# Supplementary material for: Synthesis and Evaluation of a 2,11‐Cembranoid‐Inspired Library
Source: PubMed Central journal article supplement (PMC4869678; doi:10.1002/chem.201505093), 2016-03-01

# CHEMISTRY

## A **European** Journal

### Supporting Information

#### **Synthesis and Evaluation of a 2,11-Cembranoid-Inspired Library**

Amanda J Welford,<sup>[a]</sup> John J. Caldwell,<sup>\*[a]</sup> Manjuan Liu,<sup>[a]</sup> Meirion Richards,<sup>[a]</sup> Nathan Brown,<sup>[a]</sup> Cara Lomas,<sup>[a]</sup> Graham J. Tizzard,<sup>[b]</sup> Mateusz B. Pitak,<sup>[b]</sup> Simon J. Coles,<sup>[b]</sup> Suzanne A. Eccles,<sup>[a]</sup> Florence I. Raynaud,<sup>[a]</sup> and Ian Collins<sup>[a]</sup>

chem\_201505093\_sm\_miscellaneous\_information.pdf

## Contents

|     |                                              |
|-----|----------------------------------------------|
| S2  | General experimental                         |
| S5  | Experimental procedures                      |
| S61 | Assay methods                                |
| S62 | PCA methodology                              |
| S64 | crystallography data                         |
| S68 | NCI cytotoxicity screening compounds         |
| S69 | References                                   |
| S70 | $^1\text{H}$ and $^{13}\text{C}$ NMR spectra |

## General experimental

All anhydrous solvents and reagents were obtained from commercial suppliers and used without further purification unless otherwise noted. Flash column chromatography was carried out on Merck silica gel 60 (0.040-0.063 mm).

All melting points were determined on a Stanford Research Systems MPA120 EZ-Melt melting point apparatus.

Analytical thin layer chromatography (TLC) was performed on pre-coated aluminium sheets of silica (60 F<sub>254</sub>, Merck) and visualised by short-wave UV light, potassium permanganate vanillin or anisaldehyde dip. Infrared spectra were recorded on a Perkin Elmer Spectrum RX-1 or a Bruker Alpha-P FT-IR spectrometer. Optical rotations were recorded on a Bellingham and Stanley ADP440 Polarimeter.

<sup>1</sup>H-nuclear magnetic resonance spectra were recorded at 500 MHz on Bruker Avance 500 spectrometers using an internal deuterium lock. Chemical shifts were measured in parts per million (ppm) relative to tetramethylsilane ( $\delta = 0$ ) using the following internal references for residual protons in the solvent: CDCl<sub>3</sub> ( $\delta$  7.26), CD<sub>3</sub>OD ( $\delta$  3.32), pyridine-*d*<sub>6</sub> ( $\delta$  8.74) and acetone-*d*<sub>6</sub> ( $\delta$  2.05).

<sup>13</sup>C-nuclear magnetic resonance spectra were recorded at 126 MHz on Bruker Avance 500 spectrometers using an internal deuterium lock. All chemical shift values were reported in ppm relative to tetramethylsilane ( $\delta = 0$ ). The following internal references were used: CDCl<sub>3</sub> ( $\delta_c$  77.0), CD<sub>3</sub>OD ( $\delta$  49.0) and Pyridine-*d*<sub>5</sub> ( $\delta$  150.3).

LC-MS analyses were performed on a Micromass LCT / Water's Alliance 2795 HPLC system using the column, flow rates and solvent gradient specified below at a temperature of 22 °C.

**UV Detector:** Waters 2487 Dual  $\lambda$  Absorbance Detector (detecting at 254nm)

**LCT Gradients:**

### Method A 6min Grad

Flow rate 1 mL/min; Phenomenex Gemini 3u C18 column (3cm x 4.6mm i.d), solvent system-aqueous (0.1% Formic Acid) and methanol

| Time / min | % MeOH in MP |
|------------|--------------|
| 0          | 10           |
| 0.3        | 10           |
| 0.6        | 20           |
| 4.5        | 90           |
| 5.4        | 90           |
| 5.7        | 10           |
| 6.0        | 10           |

### Method B 6min Non-Polar

Flow rate 1mL/min; Phenomenex Gemini 3u C18 column (3cm x 4.6mm i.d), solvent system aqueous (0.1% Formic Acid) & Methanol

| Time / min | % MeOH in MP |
|------------|--------------|
| 0          | 10           |
| 0.3        | 10           |
| 0.6        | 20           |
| 3          | 90           |
| 5.4        | 90           |
| 5.7        | 10           |
| 6.0        | 10           |

### Method C Fast4min

Flow rate 2 mL/min; Merck Chromolith SpeedROD RP-18e 50x4.6mm column, solvents A = MeOH, B = Aqueous (0.1% Formic Acid)

| Time / min | A (%) | B (%) |
|------------|-------|-------|
| 0          | 10    | 90    |
| 2.25       | 90    | 10    |
| 3          | 90    | 10    |
| 3.3        | 10    | 90    |
| 3.5        | 10    | 90    |

### Method D Fast4minLipophilic

Flow: 2 mL/min; Merck Chromolith SpeedROD RP-18e 50x4.6mm column, solvents A = MeOH, B = Aqueous (0.1% Formic Acid)

| Time/min | A (%) | B (%) |
|----------|-------|-------|
| 0        | 10    | 90    |
| 1.75     | 90    | 10    |
| 3        | 90    | 10    |
| 3.3      | 10    | 90    |
| 3.5      | 10    | 90    |

### Method E Fast4minLipophilic II

Flow: 2 mL/min; Merck Chromolith SpeedROD RP-18e 50x4.6mm column, solvents A = MeOH, B = Aqueous (0.1% Formic Acid)

| Time/min | A (%) | B (%) |
|----------|-------|-------|
| 0        | 10    | 90    |
| 1        | 100   | 0     |
| 3        | 100   | 0     |



|     |    |    |
|-----|----|----|
| 3.3 | 10 | 90 |
| 3.5 | 10 | 90 |

High resolution mass spectrometry data was collected using an Agilent 6210 Time Of Flight Mass Spectrometer with a Merck Chromolith SpeedROD RP-18e 50x4.6mm column and the solvent gradients as specified below-

**Flow:** 2 mL/min, Merck Chromolith SpeedROD RP-18e 50x4.6mm column, solvent A = MeOH, B = Aqueous (0.1% Formic Acid)

| Time / min | A (%) | B (%) |
|------------|-------|-------|
| 0          | 10    | 90    |
| 2.5        | 90    | 10    |
| 3.5        | 90    | 10    |
| 3.8        | 10    | 90    |
| 4          | 10    | 90    |

**Reference Masses:**

Caffeine  $[M+H]^+ = 195.087652$ ; Reserpine  $[M+H]^+ = 609.280657$ ; (1H,1H,3H-tetrafluoropentoxy)phosphazene  $[M+H]^+ = 922.009798$ .

UV detection was at 254 nm and ionisation was positive ion electrospray. Molecular weight scan range was 50-1000. Samples were prepared as 1 mg/mL in methanol or DMSO with 3  $\mu$ L injected on a partial loop fill.

Microanalysis was carried out by Stephen Boyer, London Metropolitan Elemental Analysis Service. (Stephen Boyer, School of Human Sciences, Science Centre, London Metropolitan University, 29 Hornsey Road, London N7 7DD)

## Experimental procedures

### (*S*)-5-((*tert*-Butyldiphenylsilyloxy)methyl)furan-2-(5*H*)one **8**

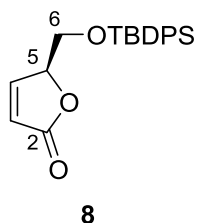

(*S*)-5-Hydroxymethylfuran-2-(5*H*)one **9** (1.00 g, 8.76 mmol) was added to a stirred solution of imidazole (660 mg, 9.76 mmol) in DMF (3 mL) and cooled to 0 °C. TBDPSCI (2.61 g, 2.47 mL, 9.76 mmol) was added dropwise and the reaction mixture was stirred for 30 min at 0 °C. The reaction was allowed to warm to RT and stirring continued for 2.5 h. The reaction mixture was quenched with sat. aq. NaHCO<sub>3</sub> (50 mL) and extracted with EtOAc (2 x 50 mL). The combined organic extracts were washed with water (50 mL) and brine (50 mL), then dried (MgSO<sub>4</sub>) and concentrated to yield a clear oil which crystallised on standing. The product was recrystallised from hexane to yield **8** as white crystals (2.38 g, 87%). mp (79-81 °C) [lit.<sup>1</sup> 79-80 °C]; [α]<sub>D</sub><sup>23</sup> -85 (c=1.50, CHCl<sub>3</sub>) [lit.<sup>2</sup> -81.5]; IR (film) 2930, 2857, 1750 (CO), 1428, 1134 cm<sup>-1</sup>; <sup>1</sup>H NMR (500 MHz, CDCl<sub>3</sub>) δ 7.78-7.59 (4H, m, Ph), 7.53-7.34 (7H, m, Ph, H-4), 6.19 (1H, dd, *J*=2.0, 6.0, H-3), 5.09-5.07 (1H, m, H-5), 3.92 (1H, dd, *J*=5.0, 11.0, Ha-6), 3.88 (1H, dd, *J*=5.0, 11.0, Hb-6), 1.06 (9H, s, <sup>t</sup>Bu); <sup>13</sup>C NMR (125 MHz, CDCl<sub>3</sub>) δ 172.8 (C2), 154.0 (C4), 135.6 (2 x Ph), 135.5 (2 x Ph), 132.8 (<sup>i</sup>Ph), 132.5 (<sup>i</sup>Ph), 130.0 (2 x Ph), 127.9 (4 x Ph), 122.7 (C3), 83.2 (C5), 63.4 (C6), 26.7 (<sup>t</sup>Bu), 19.2 (Si-C); LC-MS (ESI<sup>+</sup>) *m/z* 375 [M+Na<sup>+</sup>], R<sub>t</sub> 5.43 min [method B]; HRMS [M+Na<sup>+</sup>] calcd for C<sub>21</sub>H<sub>24</sub>O<sub>3</sub>SiNa 375.1387; found 375.1390; Found: C, 71.33; H, 6.88%; C<sub>21</sub>H<sub>24</sub>O<sub>3</sub>Si requires: C, 71.33; H, 6.86%.

### (3*S*)-3-((*tert*-Butyldiphenylsilyloxy)methyl)-3a,4,7,7a-tetrahydroisobenzofuran-1-(3*H*)-one **10**

#### Method A<sup>1,3</sup>

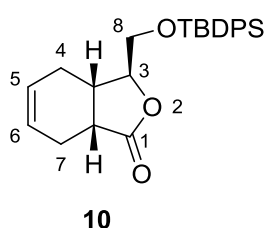

(*S*)-5-((*tert*-Butyldiphenylsilyloxy)methyl)furan-2-(5*H*)one **8** (500 mg, 1.42 mmol) was added to a stirring solution of AlCl<sub>3</sub> (50 mg, 0.375 mmol) in CH<sub>2</sub>Cl<sub>2</sub> (6 mL) in a pressure tube and cooled to 0 °C. A butadiene canister was cooled to 0 °C and butadiene (approx 3.0 mL, 25 equiv) poured into the pressure tube. The tube was sealed and heated to 55 °C for 6 d. The reaction was quenched in ice-cold sat. aq. NaHCO<sub>3</sub> (50 mL) and extracted with CH<sub>2</sub>Cl<sub>2</sub> (25 mL x 2). The organic layers were separated, washed with brine (50 mL x 2) and dried over MgSO<sub>4</sub>. The solvent was removed *in vacuo*. The crude mixture was purified by column chromatography on silica gel (15% EtOAc:hexane) to yield **10** as a clear oil (227 mg, 40%).

#### Method B

Carried out in triplicate- Trifluoromethanesulfonamide (465 mg, 3.125 mmol) was dissolved in 3.0 mL CH<sub>2</sub>Cl<sub>2</sub> in a pressure tube. 1 M Dimethylaluminium chloride in hexane (6.25 mL, 6.250 mmol) was added slowly dropwise by syringe (ensuring no contact during addition with the vessel wall) under argon (gas evolution) and the solution stirred for 30 minutes. (S)-5-((*tert*-Butyldiphenylsilyloxy)methyl)furan-2-(5*H*)one **8** (1.00 g, 2.841 mmol) and butadiene (20% w/w in toluene, 9.5 mL, 28.4 mmol) were added, the tube sealed and heated to 60 °C for 2 d. The three reactions were combined for work-up; The vessels was cooled to 0 °C before opening and diluted with Et<sub>2</sub>O (300 mL). The mixture was quenched cautiously by dropwise addition of 1M aqueous NaOH (200 mL). Gas was evolved. The aqueous layer was further extracted into Et<sub>2</sub>O (60 mL x 2). The combined organics were washed with brine (100 mL) and dried over MgSO<sub>4</sub>. The solvent was removed *in vacuo*. The crude mixture was purified by column chromatography on silica gel (10-20% EtOAc:hexane) to yield **10** as a clear oil (2.82 g, 82%). [α]<sup>20</sup><sub>D</sub> +13.0 (c=1.00, CHCl<sub>3</sub>) [lit.<sup>1</sup> +19.8]; IR (film) 3070, 3046, 2930, 2856, 1778 (CO), 1589 cm<sup>-1</sup>; <sup>1</sup>H NMR (500 MHz, CDCl<sub>3</sub>) δ 7.73-7.67 (4H, m, Ph), 7.50-7.39 (6H, m, Ph), 5.89-5.79 (2H, m, H-6, H-5), 4.17 (1H, dt, *J*=4.0, 4.0, H-3), 3.89 (1H, dd, *J*=4.0, 11.5, H-8), 3.79 (1H, dd, *J*=4.5, 11.5, H-8), 3.01 (1H, ddd, *J*=4.5, 8.5, 8.5, H-3a), 2.74-2.69 (1H, m, H-7a), 2.48-2.24 (3H, m, H-4, Ha-7), 1.97-1.90 (1H, m, Hb-7), 1.10 (9H, s, tBu); <sup>13</sup>C NMR (125 MHz, CDCl<sub>3</sub>) δ 179.5 (C1), 135.6 (2 x Ph), 135.5 (2 x Ph), 132.9 (*i*Ph), 132.6 (*i*Ph), 129.9 (Ph), 127.9 (2x Ph), 126.4 (C5 or C6), 125.6 (C5 or C6), 84.8 (C3), 64.3 (C8), 37.4 (C7a), 34.1 (C3a), 26.8 (tBu), 25.5 (C7), 22.5 (C4), 19.1 (Si-C); LC-MS (ESI<sup>+</sup>) *m/z* 429.18 [M+Na<sup>+</sup>], R<sub>t</sub> 3.08 [method A]; HRMS [M+Na<sup>+</sup>] calcd for C<sub>25</sub>H<sub>30</sub>O<sub>3</sub>Na 429.1856; found 429.1866. Found: C, 73.97; H, 7.51%, C<sub>25</sub>H<sub>30</sub>O<sub>3</sub> requires: C, 73.85; H, 7.44%.

**(3*S*,3*aS*,7*aR*)-3-((*tert*-Butyldiphenylsilyloxy)methyl)-1,3,3*a*,4,7,7*a*-hexahydroisobenzofuran-1-ol **11****

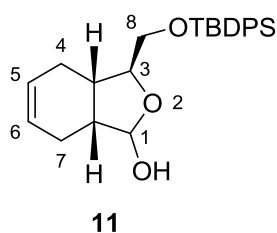

(3*S*)-3-((*tert*-Butyldiphenylsilyloxy)methyl)-3*a*,4,7,7*a*-tetrahydroisobenzofuran-1-(3*H*)one **10** (150 mg, 0.37 mmol) was dissolved in anhydrous CH<sub>2</sub>Cl<sub>2</sub> (1 mL) and cooled to -78 °C under N<sub>2</sub>. DIBAL-H (1.0 M in toluene, 0.40 mL, 0.40 mmol) was added dropwise. The reaction was stirred at -78 °C for 80 min then quenched with EtOAc (4 mL). The solution was warmed to RT and a sat. aq. solution of Rochelles salt (6 mL) was added and the mixture was stirred for 3 h. The aqueous layer was separated and extracted with CH<sub>2</sub>Cl<sub>2</sub> (3 x 5 mL). The organic layers were combined, dried over MgSO<sub>4</sub> and solvent removed *in vacuo* to yield **11** as a clear oil (145 mg, 97%). [α]<sup>23</sup><sub>D</sub> -9.13 (c=2.43 CH<sub>2</sub>Cl<sub>2</sub>); IR (film) 3409, 3024, 2929, 2856, 1427 cm<sup>-1</sup>; <sup>1</sup>H NMR (500 MHz, CDCl<sub>3</sub>) δ 7.75-7.70 (4H, m, Ph), 7.51-7.39 (6H, m, Ph), 5.75-5.72 (1H, m, H-6), 5.64-5.58 (1H, m, H-5), 5.09 (1H, d, *J*=6.0, H-3), 3.87-3.82 (2H, m, H-1, Ha-8), 3.63 (1H, dd, *J*=3.0, 10.0, Hb-8), 2.90 (1H, d, *J*=6.0, OH), 2.74 (1H, dd, *J*=7.5, 15.0, H-7a),

2.31-2.16 (3H, m, H-3a, H-7, H-4), 1.88-1.79 (2H, m, H-7, H-4), 1.11 (9H, s, <sup>t</sup>Bu); <sup>13</sup>C NMR (125 MHz, CDCl<sub>3</sub>) δ 135.7 (2 x Ph), 135.6 (2 x Ph), 133.0 (Ph), 132.9 (Ph), 129.8 (iPh), 129.7 (iPh), 127.7 (2 x Ph), 127.6 (2 x Ph), 125.0 (C5 or C6), 124.4 (C5 or C6), 103.1 (C3), 83.5 (C1), 64.6 (C8), 41.7 (C3a), 32.2 (C7a), 26.9 (tBu), 23.3 (C7 or C4), 22.8 (C7 or C4), 19.2 (Si-C); LC-MS (ESI<sup>+</sup>) m/z 431 [M+Na<sup>+</sup>], Rt 3.19 min [method B], HRMS [M+Na<sup>+</sup>] calcd for C<sub>25</sub>H<sub>32</sub>O<sub>3</sub>SiNa 431.2013; found 431.2009.

**((1*S*,3*S*,3*aR*,7*aS*)-3-Allyl-1,3,3*a*,4,7,7*a*-hexahydroisobenzofuran-1-yl)methoxy)(*tert*-butyl)diphenylsilane **12****

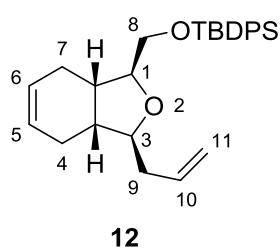

(3*S*,3*aS*,7*aR*)-3-((*tert*-Butyldiphenylsilyloxy)methyl)-1,3,3*a*,4,7,7*a*-hexahydroisobenzofuran-1-ol **11** (366 mg, 0.897 mmol) was dissolved in CH<sub>2</sub>Cl<sub>2</sub> (4 mL) and cooled to -78 °C. BF<sub>3</sub>·OEt<sub>2</sub> (0.34 mL, 2.70 mmol) was added by syringe and the solution was stirred for 5 min. Allyltrimethylsilane (0.43 mL, 2.70 mmol) was added by syringe and the reaction then warmed to RT. The reaction was stirred for 18 h before quenching with H<sub>2</sub>O (9 mL), and extracting into CH<sub>2</sub>Cl<sub>2</sub> (3x9 mL). The combined organic layers were dried over MgSO<sub>4</sub>. The solvent was removed *in vacuo* to yield **12** as a clear oil (379 mg, 98%). [α]<sup>22</sup><sub>D</sub> -13.1 (c=1.5, MeOH); IR (film) 3071, 3027, 2929, 2857, 1428 cm<sup>-1</sup>; <sup>1</sup>H NMR (500 MHz, d<sub>6</sub>-Acetone) δ 7.77-7.74 (4H, m, Ph), 7.49-7.42 (6H, m, Ph), 5.89 (1H, dddd, *J*=7.0, 7.0, 10.0, 17.0, H-10), 5.75-5.69 (2H, m, H-5, H-6), 5.06-4.97 (2H, m, H-11), 3.79-3.65 (2H, m, H-8), 3.75-3.68 (1H, m, H-1 or H-3), 3.67-3.62 (1H, m, H-1 or H-3), 2.41-1.89 (8H, m, H-4, H-7, H-3*a*, H-7*a*, H-9), 1.05 (9H, s, <sup>t</sup>Bu); <sup>13</sup>C NMR (125 MHz, d<sub>6</sub>-Acetone) δ 136.7 (C10), 136.4 (2 x Ph), 136.4 (2 x Ph), 134.6 (iPh), 134.5 (iPh), 130.6 (Ph), 130.6 (Ph), 128.7 (2 x Ph), 128.7 (2 x Ph), 126.7 (C5 or C6), 126.6 (C5 or C6), 117.1 (C11), 85.1 (C3), 84.2 (C1), 66.8 (C8), 40.4 (C3*a* or C7*a*), 40.3 (C3*a* or C7*a*), 37.4 (C9), 27.5 (<sup>t</sup>Bu), 25.6 (C4 or C7), 25.4 (C4 or C7), 19.9 (Si-C).

**((1*S*,3*S*,3*aR*,7*aS*)-3-Allyl-1,3,3*a*,4,7,7*a*-hexahydroisobenzofuran-1-yl)methanol **14****

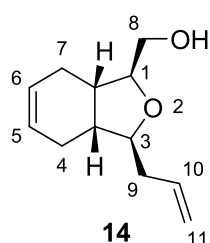

((1*S*,3*S*,3*aR*,7*aS*)-3-Allyl-1,3,3*a*,4,7,7*a*-hexahydroisobenzofuran-1-yl)methoxy)(*tert*-butyl)diphenylsilane **12** (360 mg, 0.83 mmol) was dissolved in THF (4.2 mL). The solution was cooled to 0 °C under N<sub>2</sub>, then TBAF (2.49 mL, 1.0 Mol in THF, 1.49 mmol) was added by syringe. The reaction was stirred for 2 h at 0 °C before quenching with Et<sub>2</sub>O (30 mL). The reaction mixture was washed with H<sub>2</sub>O (30 mL) and extracted into Et<sub>2</sub>O (2 x 30 mL). The combined organic layers were dried with MgSO<sub>4</sub> and solvents were removed *in vacuo* to yield the crude product as a clear oil. This was purified by column chromatography on silica gel (10% EtOAc:hexane) to yield **14** as a clear oil (132 mg, 82%).

$[\alpha]^{22}_D +17.6$  ( $c=2.60$   $\text{CH}_2\text{Cl}_2$ ); IR (film) 3414, 3075, 3026, 2975, 2841, 1435  $\text{cm}^{-1}$ ;  $^1\text{H}$  NMR (500 MHz,  $\text{CDCl}_3$ )  $\delta$  5.79 (1H, tdd,  $J=7.0, 10.0, 17.5$ , H-10), 5.78-5.73 (2H, m, H-5, H-6), 5.11-5.10 (2H, m, H-11), 3.82-3.75 (3H, m, Ha-8, H-1, H-3), 3.51 (1H, dd,  $J=6.5, 12.5$ , Hb-8), 2.39-2.28 (5H, m, Ha-9, H-7a, H-4a, Ha-7, Ha-4), 2.08 (1H, ddd,  $J=6.0, 6.5, 13.0$ , Hb-9), 1.97-1.93 (2H, Hb-7, Hb-4);  $^{13}\text{C}$  NMR (125 MHz,  $\text{CDCl}_3$ )  $\delta$  134.9 (C10), 125.8 (C5 or C6), 125.5 (C6 or C5), 117.1 (C11), 83.9 (C1 or C3), 83.7 (C1 or C3), 63.7 (C8), 39.7 (C4a or C7a), 39.5 (C9), 35.7 (C4a or C7a), 25.0 (C4 or C7), 24.4 (C4 or C7); LC-MS (ESI<sup>+</sup>)  $m/z$  217 [ $\text{M}+\text{Na}^+$ ],  $R_t$  2.38 min [method D]; HRMS [ $\text{M}+\text{Na}^+$ ] calcd for  $\text{C}_{12}\text{H}_{18}\text{O}_3\text{Na}$  217.1192; found 217.1197.

**But-2'-enoic acid (1S, 3S, 3aR, 7aS)-allyl-1, 3, 3a, 4, 7, 7a-hexahydro-isobenzofuran-8-ylmethyl ester 15**

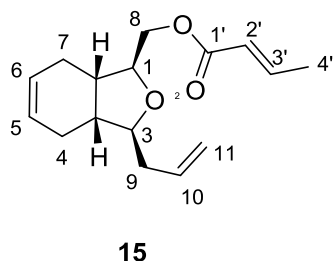

((1S,3S,3aR,7aS)-3-Allyl-1,3,3a,4,7,7a-hexahydroisobenzofuran-1-yl)methanol **14** (40 mg, 0.21 mmol) was dissolved in  $\text{CH}_2\text{Cl}_2$  (1.0 mL). Pyridine (0.05 mL, 0.63 mmol) and *trans*-crotonyl chloride (26  $\mu\text{L}$ , 0.27 mmol) were added and the reaction stirred at RT for 16 h. The reaction mixture was then diluted with  $\text{CH}_2\text{Cl}_2$  (10 mL), and washed with  $\text{H}_2\text{O}$  (2 x 10 mL) and brine (10 mL). The combined aqueous layers were extracted with  $\text{CH}_2\text{Cl}_2$  (2 x 10

mL). The organic layer was dried with  $\text{MgSO}_4$  and solvent was removed *in vacuo*. The resultant crude oil was purified by column chromatography on silica gel (15% EtOAc:hexane) to yield **15** as a clear oil (15 mg, 32%).  $[\alpha]^{19}_D -1.90$  ( $c=0.8$ ,  $\text{CH}_2\text{Cl}_2$ ); IR (film) 3027, 2916, 2843, 1723 (CO), 1443  $\text{cm}^{-1}$ ;  $^1\text{H}$  NMR (500 MHz,  $\text{CDCl}_3$ )  $\delta$  7.01 (1H, qd,  $J=7.0, 14.0$ , H-3'), 5.98-5.80 (2H, m, H-2', H-10), 5.79-5.65 (2H, m, H-5, H-6), 5.15-5.04 (2H, m, H-11), 4.25 (1H, dd,  $J=4.0, 11.5$ , Ha-8), 4.11 (1H, dd,  $J=6.0, 11.5$ , Hb-8), 3.88 (1H, ddd,  $J=4.5, 6.0, 6.0$ , H-1), 3.76 (1H, ddd,  $J=6.0, 6.0, 6.0$ , H-3), 2.32-2.19 (5H, m, H-9, H-7a, H-7, H-4), 2.17-2.09 (1H, m, H-3a), 2.01-1.91 (2H, m, H-4, H-7), 1.89 (3H, dd,  $J=1.5, 7.0$ , H-4');  $^{13}\text{C}$  NMR (125 MHz,  $\text{CDCl}_3$ )  $\delta$  199.4 (C1'), 145.0 (C3'), 134.9 (C2'), 125.7 (C5 or C6), 125.3 (C5 or C6), 122.5 (C10), 117.0 (C11), 83.9 (C3), 81.3 (C1), 65.8 (C8), 39.5 (C9), 39.1 (C3a), 37.0 (C7a), 24.8 (C4 or C7), 24.5 (C4 or C7), 17.9 (C4'); LC-MS (ESI<sup>+</sup>)  $m/z$  285 [ $\text{M}+\text{Na}^+$ ],  $R_t$  2.83 min [method D]; HRMS [ $\text{M}+\text{Na}^+$ ] calcd for  $\text{C}_{16}\text{H}_{22}\text{O}_3\text{Na}$  285.1461; found 285.1465.

**((1S,3S,3aR,7aS)-3-Allyl-1,3,3a,4,7,7a-hexahydroisobenzofuran-1-yl)methyl but-3'-enoate 16**

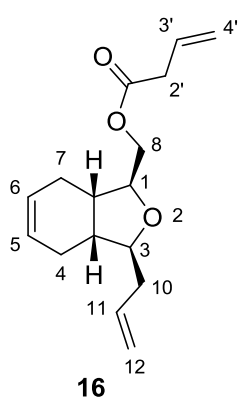

((1S,3S,3aR,7aS)-3-Allyl-1,3,3a,4,7,7a-hexahydroisobenzofuran-1-yl)methanol **14** (40 mg, 0.213 mmol) was dissolved in  $\text{CH}_2\text{Cl}_2$  (1.0 mL). Triethylamine (90  $\mu\text{L}$ , 0.630 mmol) and *trans*-crotonyl chloride (26  $\mu\text{L}$ ,

0.272 mmol) were added and the reaction left to stir at RT for 16 h. The reaction mixture was then diluted with CH<sub>2</sub>Cl<sub>2</sub> (10 mL), and washed with H<sub>2</sub>O (10 mL x 2) followed by brine (10 mL). The combined aqueous layers were extracted in to CH<sub>2</sub>Cl<sub>2</sub> (10 mL x 2). The organic layer was dried with MgSO<sub>4</sub> and solvents were removed *in vacuo*. The resultant crude oil was purified by column chromatography on silica gel (15% EtOAc:hexane) to yield **16** as a clear oil (41 mg, 75%). [ $\alpha$ ]<sup>22</sup><sub>D</sub> -6.06 (c=0.80 CH<sub>2</sub>Cl<sub>2</sub>); IR (film) 3353, 2906, 1752 (C=O), 1435, 1174 cm<sup>-1</sup>; <sup>1</sup>H NMR (500 MHz, CDCl<sub>3</sub>)  $\delta$  5.95 (1H, dddd, *J*=7.0, 7.0, 10.0, 17.0, H-3'), 5.85 (1H, dddd, *J*=7.0, 7.0, 10.0, 17.0, H-11), 5.73-5.69 (2H, m, H-5, H-6), 5.20-5.15 (2H, m H-12), 5.10-5.05 (2H, m, H-4'), 4.23 (1H, dd, *J*= 4.0, 11.5, Ha-8), 4.07 (1H, dd, *J*= 6.0, 11.5, Hb-8), 3.86 (1H, ddd, *J*=4.0, 6.0, 6.5, H-1), 3.76 (1H, ddd, *J*=6.0, 6.0, 6.0 H-3), 3.15 (2H, dd, *J*=1.5, 6.0, H-2'), 2.34-2.23 (5H, m, H-7a, H-10, H-4, H-7) 2.13-2.10 (1H, m, H-3a), 1.99-1.89 (2H, m, H-4, H-7); <sup>13</sup>C NMR (125 MHz, CDCl<sub>3</sub>) 171.5 (C1'), 134.8 (C3'), 130.2 (C11), 125.7 (C6 or C5), 125.3 (C6 or C5), 118.6 (C4'), 117 (C12), 83.9 (C3), 81.2 (C1), 66.3 (C8), 39.5 (C4a or C7a), 39.0 (C2'), 39.0 (C4a or C7a), 37.0 (C10), 24.8 (C4), 24.6 (C7); LC-MS (ESI<sup>+</sup>) *m/z* 285 [M+Na<sup>+</sup>], *R*<sub>t</sub> 2.80 [method D]; HRMS [M+H<sup>+</sup>] calcd for C<sub>16</sub>H<sub>23</sub>O<sub>3</sub>Si 263.1641; found 263.1645.

**Pent-4'enoic acid (1*S*, 3*S*, 3*aR*, 7*aS*)-allyl-1, 3, 3*a*, 4, 7, 7*a*-hexahydro-isobenzofuran-8-ylmethyl ester **17****

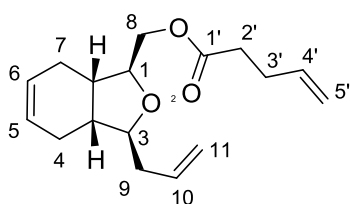

**17**

((1*S*,3*S*,3*aR*,7*aS*)-3-Allyl-1,3,3*a*,4,7,7*a*-hexahydroisobenzofuran-1-yl)methanol **14** (34 mg, 0.175 mmol) was dissolved in CH<sub>2</sub>Cl<sub>2</sub> (0.6 mL). Triethylamine (73  $\mu$ L, 0.525 mmol) and pentenonyl chloride (25  $\mu$ L, 0.223 mmol) was added and the reaction was stirred at RT for 16 h. The reaction mixture was then diluted with CH<sub>2</sub>Cl<sub>2</sub> (10 mL), washed with H<sub>2</sub>O (10 mL x 2) and brine (10 mL). The

combined aqueous layers were extracted into CH<sub>2</sub>Cl<sub>2</sub> (10 mL x 2). The organic layer was dried with MgSO<sub>4</sub> and the solvent was removed *in vacuo*. The resultant crude oil was purified by column chromatography on silica gel (15% EtOAc:hexane) to yield **17** as a clear oil (45 mg, 95%). [ $\alpha$ ]<sup>22</sup><sub>D</sub> -7.84 (c=0.30, CH<sub>2</sub>Cl<sub>2</sub>); IR (film) 2923, 2919, 2854, 1738, 1440 cm<sup>-1</sup>; <sup>1</sup>H NMR (500 MHz, CDCl<sub>3</sub>)  $\delta$  5.91-5.77 (2H, m, H-10, H-4'), 5.75-5.68 (2H, m, H-5, H-6), 5.14-4.98 (4H, m, H-5', H-11), 4.21 (1H, dd, *J*=4.0, 11.5, Ha-8), 4.03 (1H, dd, *J*=6.0, 6.0, 6.0, Hb-8), 3.85 (1H, ddd, *J*=4.0, 6.5, 6.5, H-1), 3.76 (1H, ddd, *J*=6.0, 6.0, H-3), 2.52-2.35 (4H, m, H-2', H-3'), 2.35-2.16 (5H, m, H-9, H-7a, H-4, H-7), 2.12-2.16 (1H, m, H-3a), 2.01-1.88 (2H, m, H-4, H-7); <sup>13</sup>C NMR (125 MHz, CDCl<sub>3</sub>)  $\delta$  173.0 (C1'), 136.6 (C10 or C4'), 134.8 (C10 or C4'), 125.7 (C5 or C6), 125.3 (C5 or C6), 117.1 (C11), 115.5 (C5'), 83.8 (C3), 81.2 (C1), 66.1 (C8), 39.5 (C9), 38.9 (C7a or C3a) 36.9 (C3a or C7a), 33.5 (C3'), 28.1 (C2), 24.8 (C7 or C4), 24.5 (C4 or C7); LC-MS (ESI<sup>+</sup>) *m/z* 299 [M+Na<sup>+</sup>], *R*<sub>t</sub> 2.97 min [method D]; HRMS [M+Na<sup>+</sup>] calcd for C<sub>17</sub>H<sub>24</sub>O<sub>3</sub>Na 299.1618; found 299.1619.

**((1S,3S,3aR,7aS)-3-Allyl-1,3,3a,4,7,7a-hexahydroisobenzofuran-1-yl)methyl hex-5-enoate**  
**18**

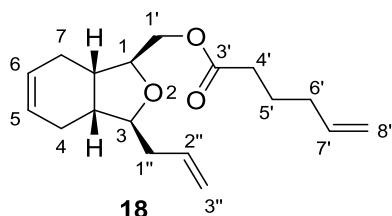

((1S,3S,3aR,7aS)-3-Allyl-1,3,3a,4,7,7a-hexahydroisobenzofuran-1-yl)methanol **14** (40 mg, 0.206 mmol) was dissolved in pyridine (1.0 mL). Hex-5-enoyl chloride (35 mg, 0.238 mmol) was added and the reaction stirred at RT for 16 h. The reaction mixture was then diluted with CH<sub>2</sub>Cl<sub>2</sub> (10 mL) and solvent removed *in vacuo* to yield a brown residue.

The residue was dissolved in CH<sub>2</sub>Cl<sub>2</sub> (10 mL), then washed with H<sub>2</sub>O (10 mL) and brine (10 mL). The combined aqueous layers were extracted with CH<sub>2</sub>Cl<sub>2</sub> (2 x 10 mL). The organic layer was dried with MgSO<sub>4</sub> and solvent was removed *in vacuo*. The resultant crude oil was purified by column chromatography on silica gel (5% EtOAc:hexane) to yield **18** as a clear oil (20 mg, 32%). [ $\alpha$ ]<sup>19</sup><sub>D</sub> -1.9 (c=0.8 CH<sub>2</sub>Cl<sub>2</sub>); IR (film) 1731 (CO), 1459 cm<sup>-1</sup>; <sup>1</sup>H NMR (500 MHz, CDCl<sub>3</sub>)  $\delta$  5.91-5.67 (4H, m, H-5, H-6, H-2'', H-7'), 5.15-4.96 (4H, m, H-3'', H-8'), 4.21 (1H, dd, *J*=4.0, 11.5, Ha-1'), 4.03 (1H, dd, *J*=6.0, 11.5, Hb-1'), 3.86 (1H, ddd, *J*=4.0, 6.0, 6.0, H-1), 3.76 (1H, ddd, *J*=6.0, 6.0, 6.0, H-3), 2.36 (2H, t, *J*=7.5, H-4'), 2.33-2.17 (5H, m, H-7, H-4, H-6', H-3a or H-7a), 2.15-2.07 (2H, m, H-1'', H-3a or H-7a), 2.02-1.87 (2H, m, H-7, H-4), 1.75 (2H, tt, *J*=7.5, 7.5, H-5'); <sup>13</sup>C NMR (125 MHz, CDCl<sub>3</sub>)  $\delta$  173.6 (C3'), 137.7 (C2'' or C7'), 134.8 (C2'' or C7'), 125.7 (C5 or C6), 125.3 (C5 or C6), 117.5 (C8'), 115.4 (C3''), 83.9 (C1), 81.2 (C3), 66.0 (C1'), 39.5 (C6'), 39.0 (C3a or C7a), 36.9 (C3a or C7a), 33.5 (C4'), 33.1 (C1''), 24.8 (C4 or C7), 24.5 (C4 or C7), 24.0 (C5'); LC-MS (ESI<sup>+</sup>) *m/z* 313 [M+Na<sup>+</sup>], *R*<sub>t</sub> 2.55 min [method D]; HRMS [M+Na<sup>+</sup>] calcd for C<sub>18</sub>H<sub>26</sub>O<sub>3</sub>Na 313.1774; found 313.1775.

**(Z)-(1S, 9S, 10R, 15S)-3, 16-Dioxa-tricyclo[7.6.1.0<sup>10,15</sup>]hexadeca-6,12-diene-4-one**  
**20**

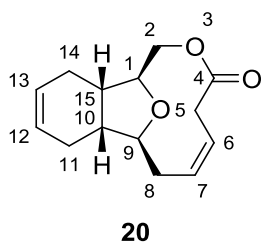

((1S,3S,3aR,7aS)-3-Allyl-1,3,3a,4,7,7a-hexahydroisobenzofuran-1-yl)methylbut-3'-enoate **16** (13 mg, 0.05 mmol) was dissolved in CH<sub>2</sub>Cl<sub>2</sub> (100 mL, 0.0005 M). Argon was bubbled through the solution for 5 min. Grubbs II (4 mg, 0.005 mmol, 5 mol%) was added under argon and the reaction stirred for 16 h. DMSO (~10  $\mu$ L) was added and the solution stirred overnight. The solvents were removed *in vacuo* and the resultant mixture purified by column chromatography on silica gel (15% EtOAc:hexane) to yield **20** as a white crystalline solid (2 mg, 10%). mp (79-81 °C); [ $\alpha$ ]<sup>22</sup><sub>D</sub> +132.0 (c=0.50 CH<sub>2</sub>Cl<sub>2</sub>); IR (film) 3020, 2952, 2889, 1731 cm<sup>-1</sup>; <sup>1</sup>H NMR (500 MHz, CDCl<sub>3</sub>)  $\delta$  5.96-5.85 (1H, m, H-7), 5.76 (1H, ddd, *J*=2.5, 5.0, 10.0, H-12), 5.74-5.67 (1H, m, H-6), 5.67-5.62 (1H, m, H-13), 5.13 (1H, dd, *J*=3.5, 11.5, Ha-2), 3.89 (1H, dd, *J*=2.5, 11.5, H-9), 3.78 (1H, dd, *J*=3.5, 11.5, H-1), 3.59 (1H, dd, *J*=11.5, Hb-2), 3.23 (1H, ddd, *J*=2.0, 7.5, 11.5, Ha-5), 2.92 (1H, dd, *J*=12.0,

9.0, Hb-5), 2.82-2.68 (2H, m, H-15, Ha-8), 2.45-2.33 (1H, m, Ha-14), 2.33-2.20 (1H, m, Ha-11) 2.10-2.06 (1H, m, H-10), 2.05-1.88 (3H, m, Hb-8, Hb-11, Hb-14);  $^{13}\text{C}$  NMR (125 MHz,  $\text{CDCl}_3$ )  $\delta$  172.4 (C4), 131.8 (C13), 125.6 (C6), 124.3 (C12), 123.4 (C7), 85.0 (C9), 80.7 (C1), 61.1 (C2), 39.4 (C10), 34.5 (C15), 34.4 (C8), 33.5 (C5), 26.1 (C11), 22.6 (C14); LC-MS (ESI<sup>+</sup>)  $m/z$  257 [M+Na<sup>+</sup>],  $R_t$  2.43 min [method D]; HRMS [M+H<sup>+</sup>] calcd for  $\text{C}_{14}\text{H}_{18}\text{O}_3\text{H}$  235.1329; found 235.1327.

**(Z)-(1S,10S,11R,16S)-3,17-Dioxa-tricyclo[8.6.1.0<sup>11,16</sup>]heptadeca-7,13-diene-4-one 21**

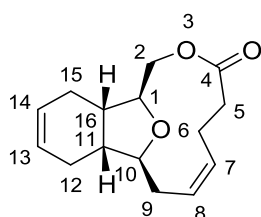

**21**

Pent-4'-enoic acid((1S,3S,3aR,7aS)-allyl-1,3,3a,4,7,7a-hexahydroisobenzofuran-8-ylmethyl ester **17** (23 mg, 0.083 mmol) was dissolved in  $\text{CH}_2\text{Cl}_2$  (166 mL, 0.0005 M). Argon was bubbled through the solution for 5 min. Grubbs II (3.5 mg, 0.004 mmol, 5 mol%) was added under argon and the reaction mixture was stirred for 16 h. DMSO (~10  $\mu\text{L}$ ) was added and the solution was stirred overnight. The solvents were removed *in vacuo* and the resultant mixture purified by column chromatography on silica gel (15% EtOAc:hexane) to yield **21** as a white crystalline solid (10 mg, 49%). mp (81-86 °C);  $[\alpha]^{22}_{\text{D}} -114.9$  ( $c=0.10$ ,  $\text{CH}_2\text{Cl}_2$ ); IR (film) 3071, 2930, 2855, 1738, 1428  $\text{cm}^{-1}$ ;  $^1\text{H}$  NMR (500 MHz,  $\text{CDCl}_3$ )  $\delta$  5.77-5.69 (1H, m, CH), 5.68-5.60 (1H, m, CH), 5.58-5.49 (2H, m, CH), 5.17 (1H, d,  $J=11.5$ , Ha-2), 3.97-3.88 (1H, dd,  $J=3.0$ , 11.5, H-10), 3.80 (1H, dd,  $J=3.0$ , 11.0, H-1) 3.60-3.47 (1H, d,  $J=12.0$ , Hb-2), 3.02-2.79 (1H, m,  $\text{CH}_2$ ), 2.78-2.53 (3H, m, H-11,  $\text{CH}_2$ ), 2.45-2.34 (2H, m,  $\text{CH}_2$ ), 2.33-2.22 (1H, m,  $\text{CH}_2$ ), 2.12-1.99 (3H, m, H-16,  $\text{CH}_2$ ), 1.98-1.81 (2H, m,  $\text{CH}_2$ );  $^{13}\text{C}$  NMR (125 MHz,  $\text{CDCl}_3$ ) 172.1 (C4), 128.5 (CH), 128.0 (CH), 125.8 (CH), 123.7 (CH), 83.4 (C10), 79.4 (C1), 59.4 (C2), 39.7 (C16), 35.2 ( $\text{CH}_2$ ), 34.1 ( $\text{CH}_2$ ), 33.9 (C11), 26.1 ( $\text{CH}_2$ ), 23.0 ( $\text{CH}_2$ ), 22.6 ( $\text{CH}_2$ ); LC-MS (ESI<sup>+</sup>)  $m/z$  271 [M+Na<sup>+</sup>],  $R_t$  2.55 min [method D]; HRMS [M+Na<sup>+</sup>] calcd for  $\text{C}_{15}\text{H}_{20}\text{O}_3\text{Na}$  271.1310; found 271.1301.

**(Z)-(1S,11S,12R,17S)-3,18-Dioxatricyclo[9.6.1.0<sup>12,17</sup>]octadeca-8,14-dien-4-one 22**

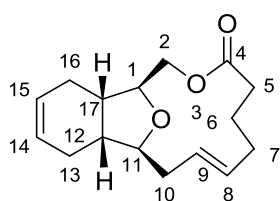

**22**

((1S,3S,3aR,7aS)-3-Allyl-1,3,3a,4,7,7a-hexahydroisobenzofuran-1-yl)methyl hex-5-enoate **18** (9 mg, 0.030 mmol) was dissolved in  $\text{CH}_2\text{Cl}_2$  (63 mL, 0.0005 M). Argon was bubbled through the solution for 5 min. Grubbs II (3 mg, 0.003 mmol, 10 mol%) was added under argon and the reaction mixture was stirred for 16 h. DMSO (10  $\mu\text{L}$ ) was added and the solution was stirred overnight. The solvents were removed *in vacuo* and the resultant mixture purified by column chromatography on silica gel (10% EtOAc:hexane) to yield **22** as a white crystalline solid (4 mg, 51%). mp (122-126 °C);  $[\alpha]^{19}_{\text{D}} -5.0$  ( $c=1.0$   $\text{CH}_2\text{Cl}_2$ ); IR (film) 3030, 2938, 2909, 1732 (CO), 1439  $\text{cm}^{-1}$ ;  $^1\text{H}$  NMR (500 MHz,  $\text{CDCl}_3$ )  $\delta$  5.81-5.70 (2H, m, CH), 5.48-5.35 (2H, m, CH), 5.20 (1H, dd,  $J=3.0$ , 12.0, Ha-2),



3.78 (1H, ddd,  $J=3.0, 3.0, 6.0$ , H-1), 3.75 (1H, ddd,  $J=1.5, 2.0, 5.0$ , H-11), 3.51 (1H, dd,  $J=3.0, 12.0$ , Hb-2), 2.48-2.22 (7H, m, CH<sub>2</sub>), 2.18-2.01 (3H, m, CH<sub>2</sub>), 1.97-1.84 (3H, m, CH<sub>2</sub>), 1.73-1.65 (1H, m, CH<sub>2</sub>); <sup>13</sup>C NMR (125 MHz, CDCl<sub>3</sub>)  $\delta$  173.8 (C4), 133.8 (CH), 126.7 (CH), 125.7 (CH), 125.5 (CH), 82.9 (C11 or C1), 82.8 (C11 or C1), 62.6 (C2), 37.4 (C12 or C17), 37.2 (C12 or C17), 34.4 (CH<sub>2</sub>), 34.1 (CH<sub>2</sub>), 33.6 (CH<sub>2</sub>), 25.6 (CH<sub>2</sub>), 24.4 (CH<sub>2</sub>), 22.5 (CH<sub>2</sub>); LC-MS (ESI<sup>+</sup>)  $m/z$  285 [M+Na<sup>+</sup>],  $R_t$  2.33 min [method D]; HRMS [M+Na<sup>+</sup>] calcd for C<sub>16</sub>H<sub>22</sub>O<sub>3</sub>Na 285.1462; found 285.1465.

**(3S,3aS,7aR)-3-((*tert*-Butyldiphenylsilyloxy)methyl)octahydroisobenzofuran-1-ol **23****

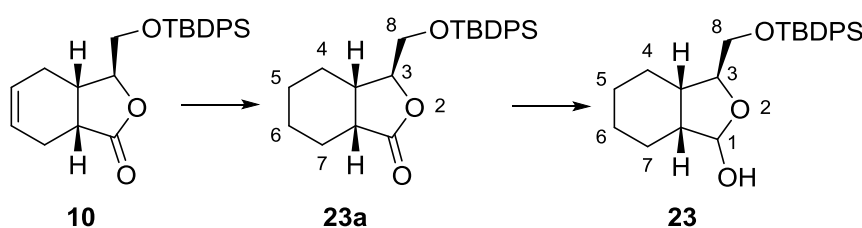

(3S)-3-((*tert*-Butyldiphenylsilyloxy)-methyl)-3a,4,7,7a-tetrahydroisobenzofuran-1(3H)-one **10** (317 mg, 0.781 mmol) was

dissolved in EtOAc (8 mL) and Pd/C (16 mg, 5% w/w Pd) was added. The solution was stirred overnight under H<sub>2</sub> (1 atm). The solution was filtered through silica eluted with EtOAc. The solvents were removed *in vacuo* to yield **23a** as a white crystalline solid (318 mg, 100%). mp (95-98 °C);  $[\alpha]_D^{23}$  6.1 ( $c=1.00$  CH<sub>2</sub>Cl<sub>2</sub>); IR (film) 3070, 2998, 2931, 2856, 1774 (CO) cm<sup>-1</sup>; <sup>1</sup>H NMR (500 MHz, CDCl<sub>3</sub>)  $\delta$  7.69-7.63 (4H, m, Ph), 7.43-7.37 (6H, m, Ph), 4.13 (1H, dd,  $J=7.0, 7.0$ , H-3), 3.83 (1H, dd,  $J=4.5, 11.5$ , Ha-8), 3.76 (1H, dd,  $J=4.5, 11.5$ , Hb-8), 2.84 (1H, dd,  $J=7.0, 11.5$ , H-7a), 2.41-2.50 (1H, m, H-3a), 2.05-1.94 (1H, m, Ha-7), 1.85-1.74 (1H, m, Ha-4), 1.71-1.48 (4H, m, H-5, H-6), 1.38-1.21 (2H, m, Hb-4, Hb-7), 1.06 (9H, s, <sup>t</sup>Bu); <sup>13</sup>C NMR (125 MHz, CDCl<sub>3</sub>)  $\delta$  178.6 (C1), 135.6 (2 x Ph), 135.6 (2 x Ph), 132.9 (<sup>i</sup>Ph), 132.7 (<sup>i</sup>Ph), 129.9 (2 x Ph), 127.8 (4 x Ph), 83.1 (C3), 64.1 (C8), 38.7 (C7a), 36.6 (C3a), 27.7 (C4), 26.8 (<sup>t</sup>Bu), 23.2 (C5), 23.1 (C6), 22.8 (C7), 19.2 (Si-C); LC-MS (ESI<sup>+</sup>)  $m/z$  431 [M+Na<sup>+</sup>],  $R_t$  3.16 min [method D]; HRMS [M+Na<sup>+</sup>] calcd for C<sub>25</sub>H<sub>32</sub>O<sub>3</sub>SiNa 431.2012; found 431.2020.

(3S,3aS,7aR)-3-((*tert*-Butyldiphenylsilyloxy)methyl)hexahydroiso-benzofuran-1-(3H)one **23a** (240 mg, 0.584 mmol) was dissolved in anhydrous CH<sub>2</sub>Cl<sub>2</sub> (4.4 mL) and cooled to 78 °C under N<sub>2</sub>. DIBAL-H (1.0 Mol in toluene, 0.97 mL, 0.97 mmol) was added dropwise. The reaction was stirred at 78 °C for 2 h then quenched with EtOAc (10 mL). The solution was warmed to RT and a sat. aq. solution of Rochelle's salt (30 mL) was added and the mixture was stirred for 2 h. The organic layer was separated and washed with brine (30 mL). The aqueous layers were extracted with CH<sub>2</sub>Cl<sub>2</sub> (3 x 30 mL). The combined organic layers were dried over MgSO<sub>4</sub> and solvent removed *in vacuo* to yield the product as a clear oil (241 mg, 100%).  $[\alpha]_D^{21.2}$  -12.0 ( $c=0.15$  Et<sub>2</sub>O); IR (film) 3416, 3070, 2960, 2938, 2857, 1428 cm<sup>-1</sup>; <sup>1</sup>H NMR (500 MHz, CDCl<sub>3</sub>)  $\delta$  7.77-7.71 (4H, m, Ph), 7.52-5.43 (6H, m, Ph), 5.02 (1H, d,  $J=6.0$ , H-1), 4.02 (1H, dd,  $J=3.5, 6.0$ , H-3), 3.83 (1H, dd,  $J=3.0, 11.0$ , Ha-8), 3.60 (1H, dd,  $J=3.5, 11.0$ , Hb-8), 2.94 (1H, d,  $J=6.0$ , OH),

2.63-2.50 (1H, m, H-3a), 2.10 (1H, ddd,  $J = 6.0, 6.0, 6.0$  H-7a), 1.74-1.46 (6H, m, CH<sub>2</sub>), 1.29-1.16 (2H, m, CH<sub>2</sub>), 1.05 (9H, s, <sup>t</sup>Bu); <sup>13</sup>C NMR (125 MHz, CDCl<sub>3</sub>)  $\delta$  135.7 (2 x Ph), 135.7 (2 x Ph), 133.0 (Ph), 132.9 (Ph), 129.8 (Ph), 129.8 (Ph), 127.8 (2 x Ph), 127.8 (2 x Ph), 102.8 (C1), 81.2 (C3), 64.9 (C8), 46.2 (C7a), 34.0 (3a), 26.9 (<sup>t</sup>Bu), 25.2 (CH<sub>2</sub>), 24.0 (CH<sub>2</sub>), 23.7 (CH<sub>2</sub>), 21.4 (CH<sub>2</sub>), 19.2 (Si-C); LC-MS (ESI<sup>+</sup>)  $m/z$  433 [M+Na<sup>+</sup>],  $R_t$  3.27 min [method D], HRMS [M + Na<sup>+</sup>] calcd for C<sub>25</sub>H<sub>34</sub>O<sub>3</sub>SiNa 433.2169; found 433.2166.

### **((1S,3S,3aR,7aS)-3-Allyloctahydroisobenzofuran-1-ylmethoxy)*tert*-butyldiphenylsilane 24**

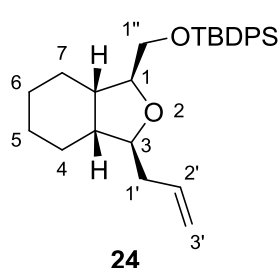

**24**

(3S,3aS,7aR)-3-((*tert*-Butyldiphenylsilyloxy)methyl)octahydroisobenzofuran-1-ol **23** (120 mg, 0.618 mmol) was dissolved in CH<sub>2</sub>Cl<sub>2</sub> (6 mL) and the solution was cooled to -78 °C. BF<sub>3</sub>·OEt<sub>2</sub> (240  $\mu$ L, 1.849 mmol) was added by syringe and the solution was stirred for 5 min. Allyltrimethylsilane (300  $\mu$ L, 1.85 mmol) was added by syringe and the reaction then warmed to RT over 18 h. The reaction was diluted with 15 mL CH<sub>2</sub>Cl<sub>2</sub> (15 mL) and washed with H<sub>2</sub>O (7 mL). The aqueous

layer was extracted with CH<sub>2</sub>Cl<sub>2</sub> (2 x 20 mL). The combined organic layers were washed with brine (10 mL) and dried over MgSO<sub>4</sub>. The solvents were removed *in vacuo* to yield **24** as a clear oil (268 mg, 100%). [ $\alpha$ ]<sub>D</sub><sup>22</sup> 2.11 ( $c = 0.46$  CH<sub>2</sub>Cl<sub>2</sub>); IR (film) 3072, 3050, 2929, 2858, 1472, 1428 cm<sup>-1</sup>; <sup>1</sup>H NMR (500 MHz, CDCl<sub>3</sub>)  $\delta$  7.80-7.65 (4H, m, Ph), 7.50-7.35 (6H, m, Ph), 5.86 (1H, tdd,  $J = 7.0, 10.0, 17.0$ , H-2'), 5.10-5.02 (2H, m, H-3'), 3.91-3.83 (2H, m, H-1, H-3), 3.65 (2H, d,  $J = 5.0$ , H-1''), 2.30-2.18 (3H, m, H-1', H-7a), 1.93 (1H, ddd,  $J = 6.0, 6.0, 6.0$ , H-3a), 1.70-1.58 (2H, m, Ha-7, Ha-4), 1.57-1.45 (4H, m, Hb-4, Ha-5, Ha-6, Hb-7), 1.42-1.32 (2H, m, Hb-5, Hb-6), 1.08 (9H, s, <sup>t</sup>Bu); <sup>13</sup>C NMR (125 MHz, CDCl<sub>3</sub>) 135.7 (2 x Ph), 135.6 (2 x Ph), 134.5 (<sup>i</sup>Ph), 134.4 (<sup>i</sup>Ph), 133.8 (Ph), 133.7 (Ph), 130.2 (C2'), 129.6 (Ph), 129.6 (Ph), 127.9 (Ph), 127.6 (Ph), 116.4 (C3'), 82.7 (C1), 81.7 (C3), 65.9 (C1''), 41.8 (C3a), 40.1 (C9), 38.9 (C7a), 26.9 (<sup>t</sup>Bu), 26.0 (C7 or C4), 25.9 (C4 or C7), 23.4 (C5 or C6), 23.2 (C5 or C6), 19.2 (Si-C).

### **((1S,3S,3aR,7aS)-3-Allyloctahydroisobenzofuran-1-yl)methanol 25**

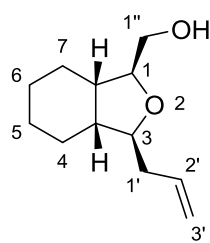

**25**

((1S,3S,3aR,7aS)-3-Allyloctahydroisobenzofuran-1-ylmethoxy)*tert*-butyldiphenylsilane **24** (410 mg, 0.945 mmol) was dissolved in THF (9.4 mL). The solution was cooled to 0 °C under N<sub>2</sub> and then TBAF (2.8 mL, 2.8 mmol, 1.0 M in THF) was added by syringe. The reaction was stirred for 2 h at 0 °C before quenching with Et<sub>2</sub>O (30 mL). The reaction mixture was washed with H<sub>2</sub>O (2 x 30 mL) and the aqueous layers extracted into Et<sub>2</sub>O (2 x 30 mL). The combined organic layers were dried over MgSO<sub>4</sub> and the

solvents were removed *in vacuo*. The crude residue was purified by column chromatography on silica gel (50% EtOAc:hexane) to yield **25** as a clear oil (131 mg, 74%). [ $\alpha$ ]<sub>D</sub><sup>22</sup> -9.0 ( $c = 1.26$

CH<sub>2</sub>Cl<sub>2</sub>); IR (film) 3414, 2929, 2856, 1449 cm<sup>-1</sup>; <sup>1</sup>H NMR (500 MHz, CDCl<sub>3</sub>) δ 5.92-5.74 (1H, dddd, *J*=7.0, 7.0, 10.0, 17.0, H-2'), 5.19-5.03 (2H, m, H-3'), 3.97-3.79 (2H, m, H-3, H-1), 3.67 (1H, dd, *J*=3.5, 11.5, H-1''), 3.45 (1H, dd, *J*=5.5, 11.5, H-1''), 2.33-2.16 (3H, m, H-1'), 2.11 (1H, ddd, *J*=6.5, 6.5, 12.5, H-7a), 3.50-3.43 (1H, m, H-3a), 1.70-1.69 (2H, m, CH<sub>2</sub>), 1.59-1.28 (6H, m, 6 x CH<sub>2</sub>); <sup>13</sup>C NMR (125 MHz, CDCl<sub>3</sub>) δ 135.1 (C2'), 117.1 (C3'), 82.2 (C3 or C1), 82.1 (C3 or C1), 64.3 (C1''), 42.2 (C3a), 40.1 (C1'), 37.8 (C7a), 26.4 (CH<sub>2</sub>, 25.6 (CH<sub>2</sub>), 23.4 (CH<sub>2</sub>), 22.8 (CH<sub>2</sub>); LC-MS (ESI<sup>+</sup>) *m/z* 219 [M+Na<sup>+</sup>], *R*<sub>t</sub> 2.47 min [method D]; HRMS [M+Na<sup>+</sup>] calcd for C<sub>12</sub>H<sub>20</sub>O<sub>3</sub>Na 219.1362; found 219.1363.

**(Z)-(1S,10S,11R,16S)-3,17-Dioxatricyclo[8.6.1.0<sup>11,16</sup>]heptadeca-7-en-4-one 26 and (E)-(1S,10S,11R,16S)-3,17-Dioxatricyclo[8.6.1.0<sup>11,16</sup>]heptadeca-7-en-4-one 27**

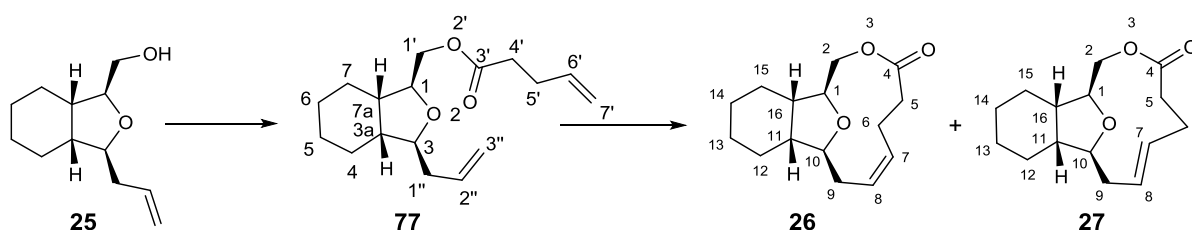

((1S,3S,3aR,7aS)-3-Allyloctahydroisobenzofuran-1-yl) methanol **25** (40 mg, 0.203 mmol) was dissolved in CH<sub>2</sub>Cl<sub>2</sub> (0.9 mL). Pent-4-enoyl chloride (29 μL, 0.275 mmol) and triethylamine (89 μL, 0.609 mmol) were added and the reaction mixture was stirred at RT for 18 h. The reaction mixture was diluted with CH<sub>2</sub>Cl<sub>2</sub> (10 mL) and washed with H<sub>2</sub>O (10 mL x 2) and brine (10 mL). The aqueous layers were combined and extracted with CH<sub>2</sub>Cl<sub>2</sub> (10 mL x 2). The combined organic layers were dried with MgSO<sub>4</sub> and the solvents removed *in vacuo*. The crude reaction mixture was purified by column chromatography on silica gel (10% EtOAc:hexane) to yield **77** as a clear oil (39 mg, 69%). [α]<sub>D</sub><sup>20</sup> -1.2 (*c*=1.0 CHCl<sub>3</sub>); IR (CDCl<sub>3</sub> solution cell) 3081, 2932, 1732 (CO), 1641, 1451 cm<sup>-1</sup>; <sup>1</sup>H NMR (500 MHz, CDCl<sub>3</sub>) δ 5.93-5.73 (2H, m, H-6', H-2''), 5.17-4.97 (4H, m, H-7', H-3''), 4.14 (1H, dd, *J*=6.5, 14.0, Ha-1'), 4.03-3.93 (2H, m, Hb-1', H-1), 3.86 (1H, dd, *J*=6.0, 11.5, H-3), 2.50-2.35 (4H, m, H-4', H-5'), 2.29-2.17 (2H, m, H-1''), 2.09-2.01 (1H, m, H-7a), 2.00-1.91 (1H, m, H-3a), 1.70-1.59 (2H, m, CH<sub>2</sub>), 1.58-1.28 (6H, m, CH<sub>2</sub>); <sup>13</sup>C NMR (125 MHz, CDCl<sub>3</sub>) δ 173.1 (C3'), 136.7 (C6' or C2''), 135.0 (C6' or C2''), 116.9 (C7' or C3''), 115.5 (C7' or C3''), 82.4 (C3), 79.8 (C1), 66.6 (C1'), 41.6 (C3a), 40.0 (C1''), 39.1 (C7a), 33.5 (C4'), 28.8 (C5'), 26.2 (CH<sub>2</sub>), 25.8 (CH<sub>2</sub>), 23.2 (CH<sub>2</sub>), 22.9 (CH<sub>2</sub>); LC-MS (ESI<sup>+</sup>) *m/z* 301 [M+Na<sup>+</sup>], *R*<sub>t</sub> 2.93 min [method D]; HRMS [M+Na<sup>+</sup>] calcd for C<sub>17</sub>H<sub>26</sub>O<sub>3</sub> Na 301.1774 found 301.1765.

((1S,3S,3aR,7aS)-3-Allyloctahydroisobenzofuran-1-yl)methyl pent-4-enoate **77** (23 mg, 0.083 mmol) was dissolved in CH<sub>2</sub>Cl<sub>2</sub> (165 mL, 0.0005 M). Argon was bubbled through the solution for 5 min. Grubbs II (7 mg, 0.008 mmol, 10 mol%) was added under argon and the reaction

mixture was stirred for 16 h. DMSO (10  $\mu$ L) was added and the solution was stirred overnight. The solvents were removed *in vacuo* and the resultant mixture purified by column chromatography on silica gel (10% EtOAc:hexane) to yield **26** and **27** as a white crystalline solid (13 mg, 65%) and a clear oil (4 mg, 20%) respectively. **26**: mp (141-143  $^{\circ}$ C);  $[\alpha]_D^{19}$  -1.9 ( $c=0.36$  CH<sub>2</sub>Cl<sub>2</sub>); IR (film) 2980, 1732 (CO), 1551 cm<sup>-1</sup>; <sup>1</sup>H NMR (500 MHz, Pyr-d5)  $\delta$  5.53-5.38 (2H, m, H-8, H-7), 5.25 (1H, d,  $J=11.5$  Ha-2), 3.92 (1H, d,  $J=11.0$ , H-1), 3.71 (1H, d,  $J=11.5$ , H-10), 3.39 (1H, d,  $J=11.5$ , Hb-2), 2.85-2.81 (1H, m, Ha-6), 2.61-2.46 (2H, m, Ha-5, Ha-9), 2.43-2.27 (2H, m, H-16, Hb-5), 1.83-1.79 (1H, m, Hb-6), 1.75-1.61 (2H, m, Ha-9, H-11), 1.59-1.48 (4H, m, Ha-12, Ha-14, H-15), 1.38-1.36 (1H, m, Ha-13), 1.21-0.89 (3H, m, Hb-14, Hb-13, Hb-12)); <sup>13</sup>C NMR (125 MHz, CDCl<sub>3</sub>)  $\delta$  172.2 (C4), 129.7 (C8), 128.8 (C7), 83.5 (C10), 77.6 (C1), 60.3 (C2), 45.2 (C11), 36.7 (C16), 35.9 (C14), 35.0 (C9), 28.2 (C5), 25.6 (C12), 23.7 (C15), 23.5 (C13 or C14), 21.7 (C13 or C14); LC-MS (ESI<sup>+</sup>)  $m/z$  273 [M+Na<sup>+</sup>],  $R_t$  2.30 min [method D]; HRMS [M+H<sup>+</sup>] calcd for C<sub>15</sub>H<sub>23</sub>O<sub>3</sub> 251.1642; found 251.1634. **27**:  $[\alpha]_D^{19}$  -49.1 ( $c=0.24$  CH<sub>2</sub>Cl<sub>2</sub>); IR (film) 2925, 1735 (CO) cm<sup>-1</sup>; <sup>1</sup>H NMR (500 MHz, Pyr-d5)  $\delta$  5.57-5.50 (1H, m, H-8), 5.48-5.40 (1H, m, H-7), 4.92-4.68 (1H, m, Ha-2), 4.02-3.95 (1H, m, H-10), 3.77-3.74 (2H, m, Hb-2, H-1), 2.49-2.46 (1H, m, Ha-9), 2.39-2.30 (2H, m, Ha-5, Ha-6), 2.26-2.19 (3H, m, Hb-5, Hb-6, H-11), 2.11-2.09 (1H, m, H-16), 1.95-1.91 (1H, m, Hb-9), 1.49-1.40 (2H, m, Ha-13, Ha-12), 1.39-1.35 (2H, m, Hb-12, Ha-15), 1.34-1.30 (3H, m, H-14, Hb-15), 1.22-1.17 (1H, m, Hb-13); <sup>13</sup>C NMR (125 MHz, CDCl<sub>3</sub>)  $\delta$  173.5 (C4), 131.2 (C7), 127.9 (C8), 82.2 (C1), 80.5 (C10), 64.9 (C2), 40.0 (C16), 38.8 (C11), 36.1 (C5), 34.2 (C9), 29.5 (C6), 27.3 (C15), 25.1 (C12), 23.9 (C13), 22.3 (C14); LC-MS (ESI<sup>+</sup>)  $m/z$  273 [M+Na<sup>+</sup>],  $R_t$  2.27 min [method D]; HRMS [M+H<sup>+</sup>] calcd for C<sub>15</sub>H<sub>23</sub>O<sub>3</sub> 251.1642; found 251.1636.

**(Z)-(1S,11S,12R,17S)-3,18-Dioxatricyclo[9.6.1.0<sup>12,17</sup>]octadec-8-en-4-one 28**

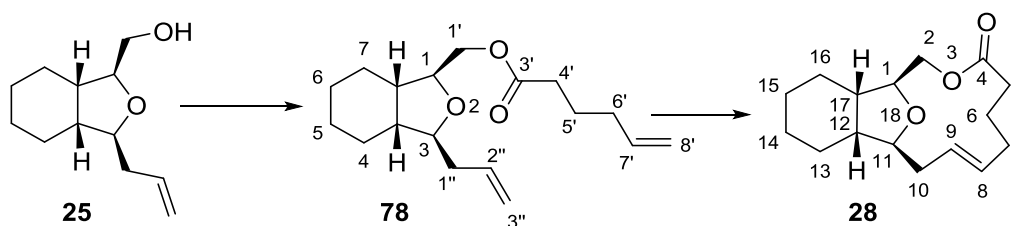

((1S,3S,3aR,7aS)-3-Allyloctahydroisobenzofuran-1-yl)methanol **25** (35 mg, 0.178 mmol) was dissolved in CH<sub>2</sub>Cl<sub>2</sub> (0.9 mL). Freshly prepared hex-5-enoyl chloride (30 mg, 0.267 mmol) and triethylamine (77  $\mu$ L, 0.534 mmol) were added and the reaction mixture was stirred at RT for 18 h. The reaction mixture was diluted with CH<sub>2</sub>Cl<sub>2</sub> (10 mL) and washed with H<sub>2</sub>O (10 mL) and brine (10 mL). The aqueous layers were combined and extracted with CH<sub>2</sub>Cl<sub>2</sub> (10 mL x 2). The combined organic layers were dried with MgSO<sub>4</sub> and the solvents removed *in vacuo*. The crude reaction mixture was purified by column chromatography on silica gel (5% EtOAc:hexane) to yield **78** as a clear oil (27 mg, 57%).  $[\alpha]_D^{19}$  -9.0 ( $c=1.0$  CH<sub>2</sub>Cl<sub>2</sub>); IR (CDCl<sub>3</sub> solution cell) 3080, 2932, 1731 (CO), 1641, 1451 cm<sup>-1</sup>; <sup>1</sup>H NMR (500 MHz, CDCl<sub>3</sub>)  $\delta$  5.89-5.71 (2H, m, H-2'', H-7'), 5.13-4.95 (4H, m, H-3'', H-8'), 4.14 (1H, dd,  $J=6.5, 6.5$ , Ha-1'), 4.05-3.94

(2H, m, Hb-1', H-1), 3.87 (1H, dd,  $J=6.0, 11.5$ , H-3), 2.38 (2H, t,  $J=7.0$ , H-4'), 2.31-2.17 (2H, m, H-1''), 2.14-2.00 (3H, m, H-6', H-7a), 2.00-1.92 (1H, m, H-3a), 1.75 (2H, tt,  $J=7.5, 7.5$ , H-5'), 1.70-1.58 (2H, m, CH<sub>2</sub>), 1.57-1.23 (6H, m, CH<sub>2</sub>); <sup>13</sup>C NMR (125 MHz, CDCl<sub>3</sub>)  $\delta$  173.7 (C3'), 137.7 (C7' or C2''), 135.1 (C7' or C2''), 116.9 (C3'' or C8'), 115.4 (C3'' or C8'), 82.5 (C1), 79.4 (C3), 66.5 (C8), 41.6 (C3a), 40.0 (C1''), 39.2 (C7a), 33.5 (C4'), 33.1 (C6'), 26.2 (CH<sub>2</sub>), 25.7 (CH<sub>2</sub>), 24.0 (C5'), 23.3 (CH<sub>2</sub>), 22.9 (CH<sub>2</sub>); LC-MS (ESI<sup>+</sup>)  $m/z$  315 [M+Na<sup>+</sup>], R<sub>t</sub> 2.63 min [method D]; HRMS [M+Na<sup>+</sup>] calcd for C<sub>18</sub>H<sub>28</sub>O<sub>3</sub>Na 315.1930; found 315.1935.

((1S,3S,3aR,7aS)-3-Allyloctahydroisobenzofuran-1-yl)methyl hex-5-enoate **78** (25 mg, 0.080 mmol) was dissolved in CH<sub>2</sub>Cl<sub>2</sub> (100 mL, 0.0008 M). Argon was bubbled through the solution for 5 min. Grubbs II (7 mg, 0.008 mmol, 10 mol%) was added under argon and the reaction mixture was stirred for 16 h. DMSO (10  $\mu$ L) was added and the solution was stirred overnight. The solvents were removed *in vacuo* and the resultant mixture purified by column chromatography on silica gel (10% EtOAc:hexane) to yield **28** as a white crystalline solid (10 mg, 51%). mp (141-143 °C);  $[\alpha]_D^{25}$  -33.4 (c=1.0 CHCl<sub>3</sub>); IR (film) 3081, 2931, 2858, 1731, 1642, 1451 cm<sup>-1</sup>; <sup>1</sup>H NMR (500 MHz, CDCl<sub>3</sub>)  $\delta$  5.39-5.35 (2H, m, H-8, H-9), 5.16 (1H, d,  $J=11.0$ , Ha-2), 3.95-3.91 (1H, m, H-11), 3.81-3.78 (1H, m, H-1), 3.47 (1H, d,  $J=11.0$ , Hb-2), 2.45-2.28 (3H, m, 3 x CH<sub>2</sub>), 2.26-2.18 (1H, m, H-17), 2.17-1.97 (4H, m, 4 x CH<sub>2</sub>), 1.95-1.85 (1H, m, CH<sub>2</sub>), 1.73-1.61 (4H, m, CH<sub>2</sub>), 1.57-1.29 (5H, m, CH<sub>2</sub>); <sup>13</sup>C NMR (125 MHz, CDCl<sub>3</sub>)  $\delta$  173.8 (C4), 133.5 (C8 or C9), 125.8 (C8 or C9), 81.2 (C1), 80.3 (C11), 63.0 (C2), 39.8 (C17), 39.1 (C12), 34.7 (CH<sub>2</sub>), 34.0 (CH<sub>2</sub>), 33.7 (CH<sub>2</sub>), 27.1 (CH<sub>2</sub>), 25.5 (CH<sub>2</sub>), 23.9 (CH<sub>2</sub>), 22.9 (CH<sub>2</sub>), 22.5 (CH<sub>2</sub>); LC-MS (ESI<sup>+</sup>)  $m/z$  287 [M+Na<sup>+</sup>], R<sub>t</sub> 2.50 min [method D]; HRMS [M+H<sup>+</sup>] calcd for C<sub>16</sub>H<sub>25</sub>O<sub>3</sub> 265.1798 found 265.1796.

### (1S,3S,3aS,7aR)-1-Allyl-3-(allyloxymethyl)-1,3,3a,4,7,7a-hexahydroisobenzofuran 29

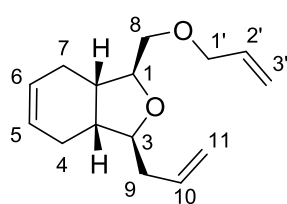

**29**

((1S,3S,3aR,7aS)-3-Allyl-1,3,3a,4,7,7a-hexahydroisobenzofuran-1-yl)methanol **14** (48 mg, 0.247 mmol) was dissolved in DMF (1 mL). NaH (24 mg, 0.618 mmol, 60% dispersion in mineral oil) was then added to the solution followed by allyl bromide (25  $\mu$ L, 0.296 mmol) by syringe. The reaction was stirred overnight at RT. The reaction was then quenched with H<sub>2</sub>O (2 mL) and extracted with Et<sub>2</sub>O (5 x 10 mL) and the organic layers subsequently washed with H<sub>2</sub>O (5 x 20 mL). The organic layer was dried with MgSO<sub>4</sub> and solvents removed *in vacuo*. The resultant crude oil was purified by column chromatography on silica gel (15% EtOAc:hexane) to yield **29** as a clear oil (28 mg, 49%).  $[\alpha]_D^{19}$  -9.8 (c=2.20, CH<sub>2</sub>Cl<sub>2</sub>); IR (film) 3076, 3025, 2900, 2843, 1641, 1437 cm<sup>-1</sup>; <sup>1</sup>H NMR (500 MHz, CDCl<sub>3</sub>)  $\delta$  6.01-5.76 (2H, m, H-2', H-10), 5.79-5.66 (2H, m, H-5, H-6), 5.33-5.32 (1H, m, Ha-3'), 5.23-5.13 (1H, m, Hb-3'), 5.13-5.02 (2H, m, H-11), 4.10-4.00 (2H, m, H-1'), 3.81 (1H, ddd,  $J=5.5, 5.5, 5.5$ , H-1), 3.73 (1H, dd,  $J=6.0, 6.0, 6.0$ , H-3), 3.52-3.44 (2H, m, H-8), 2.38-2.16 (5H, m, H-9, H-7a, Ha-4, Ha-7), 2.11 (1H, ddd,  $J=6.5, 6.5, 13.0$ , H-3a), 2.01-1.87 (2H, m,

Hb-7, Hb-4);  $^{13}\text{C}$  NMR (125 MHz,  $\text{CDCl}_3$ )  $\delta$  135.2 (C2'), 134.9 (C10), 125.8 (C5 or C6), 125.7 (C5 or C6), 116.7 (C3' or C11), 116.7 (C3' or C11), 83.6 (C3), 82.7 (C1), 72.5 (C8 or C1'), 72.4 (C8 or C1'), 39.5 (C9), 39.3 (C3a), 37.3 (C7a), 24.8 (C7), 24.8 (C4); LC-MS (ESI<sup>+</sup>)  $m/z$  257 [M+Na<sup>+</sup>],  $R_t$  2.90 min [method D]; HRMS [M+Na<sup>+</sup>] calcd for  $\text{C}_{15}\text{H}_{22}\text{O}_2\text{Na}$  257.1512; found 257.1513.

**(3aR,4aR,7S,7aS,8aS)-7-(tert-Butyldiphenylsilyloxymethyl)-2,2-dimethyl-hexahydro-benzo[3',4':4,5]benzo[1,2-d][1,3]dioxol-5-one **31****

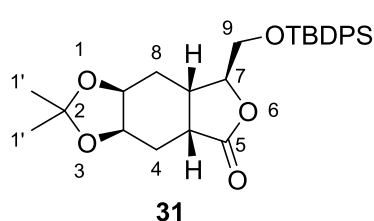

(3S)-3-((tert-Butyldiphenylsilyloxy)methyl)-3a,4,7,7a-tetrahydroisobenzofuran-1-(3H)-one **10** (1.30 g, 3.21 mmol) was dissolved in acetone:water (10:1, 32 mL). NMO (114 mg, 4.82 mmol) was added followed by Os EnCat (500 mg, 0.25 mmol/g, 0.125 mmol). The resulting solution was stirred at RT for 3 d. The Os EnCat was removed by vacuum filtration, and washed with acetone (100 mL). Sat. aq  $\text{Na}_2\text{S}_2\text{O}_5$  was added (100 mL) and stirred for 2 h. The acetone was removed *in vacuo*. The crude aqueous layer was extracted in the EtOAc (3 x 100 mL). The combined organic layers were dried over  $\text{MgSO}_4$  and solvent removed in vacuo to yield a light brown oil. The oil was redissolved in  $\text{CH}_2\text{Cl}_2$  (30 mL). 2,2-Dimethoxypropane (7.9 mL, 64.2 mmol) and pyridinium p-toluenesulfonate (241 mg, 1.08 mmol) were added and the reaction stirred at RT for 18 h. The reaction was then diluted in  $\text{CH}_2\text{Cl}_2$  (100 mL) and washed with  $\text{H}_2\text{O}$  (50 mL) and sat aq  $\text{NH}_4\text{Cl}$  (50 mL). The aqueous layers were re-extracted into  $\text{CH}_2\text{Cl}_2$  (100 mL) and the combined organic layers dried over  $\text{MgSO}_4$ . The solvent was removed *in vacuo*. The crude residue was recrystallised from  $\text{Et}_2\text{O}$  to yield **31** as a white crystalline solid (781 mg, 52%). mp (105-109 °C);  $[\alpha]_D^{22}$  -16.2 (c=1.0  $\text{CHCl}_3$ ); IR (film) 3071, 2931, 1770  $\text{cm}^{-1}$ ;  $^1\text{H}$  NMR (500 MHz,  $\text{CDCl}_3$ )  $\delta$  7.70-7.63 (4H, m, Ph), 7.49-7.39 (6H, m, Ph), 4.51 (1H, ddd,  $J=2.5, 2.5, 8.0$ , H-3a), 4.42 (1H, ddd,  $J=2.5, 2.5, 8.0$ , H-8a), 4.20-4.17 (1H, m, H-7), 3.88 (1H, dd,  $J=2.5, 11.0$ , Ha-9), 3.69 (1H, dd,  $J=2.5, 11.0$ , Hb-9), 3.13 (1H, ddd,  $J=7.5, 11.0, 11.0$ , H-4a), 2.94-2.87 (1H, m, H-7a), 2.43 (1H, ddd,  $J=3.0, 7.5, 15.0$ , Ha-4), 1.97 (1H, ddd,  $J=2.5, 4.5, 14.0$ , Ha-8), 1.59-1.44 (2H, m, Hb-4, Hb-8), 1.52 (3H, s, H-1'), 1.38 (3H, m, H-1'), 1.09 (9H, s,  $^t\text{Bu}$ );  $^{13}\text{C}$  NMR (125 MHz,  $\text{CDCl}_3$ )  $\delta$  180.2 (C5), 135.6 (2 x Ph), 135.5 (2 x Ph), 132.8 (iPh), 132.5 (iPh), 129.9 (2 x Ph), 127.9 (4 x Ph), 107.4 (C2), 82.8 (C7), 71.5 (C8a or C3a), 71.3 (C8a or C3a), 65.4 (C9), 34.4 (C4a), 30.2 (C7a), 29.6 (C8), 26.7 ( $^t\text{Bu}$ ), 25.9 (C1'), 25.0 (C4), 23.8 (C1'), 19.2 (Si-C); LC-MS (ESI<sup>+</sup>)  $m/z$  503 [M+Na<sup>+</sup>],  $R_t$  2.58 min [method D]; HRMS [M+Na<sup>+</sup>] calcd for  $\text{C}_{28}\text{H}_{36}\text{O}_5\text{SiNa}$  503.2224 found 503.2221.

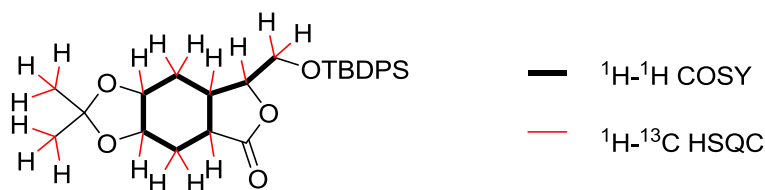

**(3aR,4aR,7S,7aS,8aS)-7-(tert-Butyldiphenylsilyloxy)methyl)-2,2-dimethyloctahydrofuro[3',4':4,5]benzo[1,2-d][1,3]dioxol-5-ol **32****

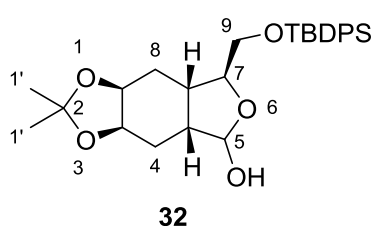

(3aR,4aR,7S,7aS,8aS)-7-(tert-Butyldiphenylsilyloxy)methyl)-2,2-dimethyl-hexahydro-furo[3',4':4,5]benzo[1,2-d][1,3]dioxol-5-one **31** (96 mg, 0.200 mmol) was dissolved in anhydrous  $\text{CH}_2\text{Cl}_2$  (2.0 mL) and cooled to  $-78\text{ }^\circ\text{C}$  under  $\text{N}_2$ . DIBAL-H (1.0 M in toluene, 0.22 mL, 0.22 mmol) was added dropwise. The reaction was stirred at  $-78\text{ }^\circ\text{C}$  for 4 h then quenched with EtOAc (10 mL). The solution was warmed to RT and a sat. aq. solution of Rochelles salt (6 mL) was added and the mixture stirred overnight. The aqueous layer was separated and extracted with  $\text{CH}_2\text{Cl}_2$  (20 mL x 3). The organic layers were combined, dried over  $\text{MgSO}_4$  and the solvent removed *in vacuo*. TLC analysis showed the presence of starting material, therefore the crude mixture was resubmitted to the above conditions for 5 h. The same work-up conditions were employed which yielded a clear oil **32** (89 mg, 92%) as an inseparable mixture of anomers. IR (film) 3418, 2930, 1113, 1040  $\text{cm}^{-1}$ ; **Major Anomer**  $^1\text{H}$  NMR (500 MHz,  $\text{CDCl}_3$ )  $\delta$  7.72-7.67 (4H, m, Ph), 7.49-7.36 (6H, m, Ph), 5.10 (1H, d,  $J=9.0$ , H-5), 4.41-4.37 (2H, m, H-3a, H-8a), 4.15-4.10 (1H, m, OH), 3.92 (1H, dd,  $J=4.0$ , 4.0, H-7), 3.82 (1H, dd,  $J=3.0$ , 11.0, Ha-9), 3.60 (1H, dd,  $J=3.5$ , 11.0, Hb-9), 2.73-2.63 (1H, m, H-7a), 2.55-2.46 (1H, m, H-4a), 2.03 (1H, ddd,  $J=2.5$ , 5.0, 14.5, Ha-4), 1.96 (1H, ddd,  $J=3.0$ , 6.0, 14.5, Ha-8), 1.50 (3H, s, H-1'), 1.36 (3H, s, H-1'), 1.37-1.28 (1H, m, Hb-8), 1.39-1.31 (1H, m, Hb-4), 1.09 (9H, s, tBu);  $^{13}\text{C}$  NMR (125 MHz,  $\text{CDCl}_3$ )  $\delta$  135.8 (2 x Ph), 135.6 (2 x Ph), 132.4 (iPh), 132.3 (iPh), 130.1 (Ph), 130.0 (Ph), 127.9 (2 x Ph), 127.9 (2 x Ph), 107.1 (C2), 105.1 (C5), 87.6 (C7), 72.0 (C8a or C3a), 71.7 (C8a or C3a), 66.9 (C9), 41.5 (C4a), 32.0 (C7a), 29.0 (C8), 27.5 (C4), 26.8 (tBu), 26.0 (C1'), 23.8 (C1'), 19.2 (Si-C); **Minor Anomer**  $^1\text{H}$  NMR (500 MHz,  $\text{CDCl}_3$ )  $\delta$  7.72-7.67 (4H, m, Ph), 7.49-7.36 (6H, m, Ph), 5.53 (1H, dd,  $J=2.0$ , 5.5, H-5), 4.52 (1H, dd,  $J=3.0$ , 3.0, H-3a or H-8a), 4.51 (1H, dd,  $J=3.0$ , 3.0, H-3a or H-8a), 4.15-4.10 (1H, m, OH), 3.96 (1H, ddd,  $J=4.5$ , 4.5, 7.0, H-7), 3.75 (2H, d,  $J=4.5$ , H-9), 2.36-2.26 (1H, m, H-7a), 1.95-1.91 (1H, m, H-4a), 1.80 (1H, ddd,  $J=2.0$ , 5.0, 14.5, Ha-4), 1.74 (1H, ddd,  $J=2.5$ , 12.0, 14.5, Ha-8), 1.45 (3H, s, H-1'), 1.35 (3H, s, H-1'), 1.44-1.40 (1H, m, Hb-8), 1.27-1.23 (1H, m, Hb-4), 1.06 (9H, s, tBu);  $^{13}\text{C}$  NMR (125 MHz,  $\text{CDCl}_3$ )  $\delta$  135.7 (2 x Ph), 135.2 (2 x Ph), 133.6 (iPh), 133.5 (iPh), 129.6 (2 x Ph), 127.9 (2 x Ph), 127.9 (2 x Ph), 106.8 (C2), 99.4 (C5), 84.0 (C7), 72.7 (C8a or C3a), 71.5 (C8a or C3a), 65.5 (C9), 36.8 (C4a), 31.7 (C7a), 29.8 (C8 or C4), 26.8 (tBu), 26.0 (C1'), 23.8

(C1'), 22.9 (C8 or C4) 19.3 (Si-C); LC-MS (ESI<sup>+</sup>) *m/z* 505 [M+Na<sup>+</sup>], R<sub>t</sub> 2.60 min [method D]; C, 70.07; H, 7.53%; C<sub>28</sub>H<sub>38</sub>O<sub>5</sub>Si requires: C, 69.97; H, 7.55%.

**((3aS,4aS,5S,7S,7aR,8aR)-7-allyl-2,2-dimethyloctahydroisobenzofuro[5,6-d][1,3]dioxol-5-yl)methanol **33****

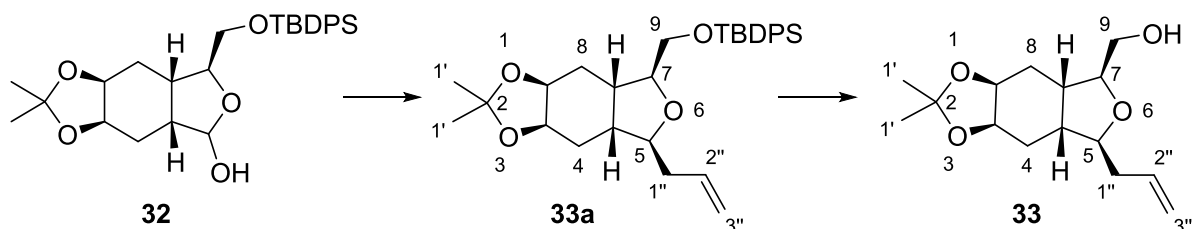

(3aR,4aR,7S,7aS,8aS)-7-(*tert*-Butyldiphenylsilyloxymethyl)-2,2-dimethyloctahydrofuro [3',4':4,5]benzo[1,2-d][1,3]dioxol-5-ol **32** (95 mg, 0.197 mmol) was dissolved in CH<sub>2</sub>Cl<sub>2</sub> (2.0 mL) and cooled to -78 °C. BF<sub>3</sub>.OEt<sub>2</sub> (0.027 mL, 0.217 mmol) was added by syringe and the solution stirred for 5 min. Allyltrimethylsilane (0.096 mL, 0.519 mmol) was added by syringe and the reaction warmed to RT over 18 h. The reaction was quenched with H<sub>2</sub>O (6 mL) and extracted into CH<sub>2</sub>Cl<sub>2</sub> (6 mL x 3). The combined organic layers were dried over MgSO<sub>4</sub>. The solvent was removed in vacuo to yield a clear oil. Partial acetal deprotection had occurred. The oil was dissolved in CH<sub>2</sub>Cl<sub>2</sub> (2.0 mL). 2,2-Dimethoxypropane (0.5 mL, 3.94 mmol) and pyridinium *p*-toluenesulfonate (12 mg, 0.059 mmol) were added and the reaction stirred as RT overnight. The reaction was then diluted with CH<sub>2</sub>Cl<sub>2</sub> (50 mL), washed with H<sub>2</sub>O (50 mL) and sat. aqueous NH<sub>4</sub>Cl (50 mL). The aqueous layers were extracted with CH<sub>2</sub>Cl<sub>2</sub> (50 mL) and the combined organic layers were dried over MgSO<sub>4</sub>. The solvent was removed in vacuo to yield **33a** a clear oil (79 mg, 79%). [α]<sub>D</sub><sup>20</sup> +0.64 (c=2.0 CHCl<sub>3</sub>); IR (film) 3049, 2931, 1472, 1428 cm<sup>-1</sup>; <sup>1</sup>H NMR (500 MHz, CDCl<sub>3</sub>) δ 7.75-7.69 (4H, m, Ph), 7.44-7.36 (6H, m, Ph), 5.89 (1H, dddd, *J*=7.5, 7.5, 10.0, 17.5, H-2''), 5.15-5.05 (2H, m, H-3''), 4.45-4.38 (2H, m, H-3a, H-8a), 3.79 (1H, dd, *J*=5.0, 10.5, Ha-9), 3.74 (1H, dd, *J*=5.0, 10.5, Hb-9), 3.57 (1H, ddd, *J*=4.5, 4.5, 7.5, H-7), 3.50 (1H, ddd, *J*=5.5, 5.5, 14.5, H-5), 2.39-2.35 (3H, m, H-7a, H-1''), 2.14-2.05 (1H, m, H-4a), 1.97 (1H, ddd, *J*=2.5, 6.0, 14.5, Ha-4 or Ha-8), 1.90 (1H, ddd, *J*=2.5, 5.5, 14.5, Ha-4 or Ha-8), 1.47 (3H, s, H-1'), 1.34 (3H, s, H-1'), 1.32-1.20 (2H, m, Hb-4, Hb-8), 1.07 (9H, s, tBu); <sup>13</sup>C NMR (125 MHz, CDCl<sub>3</sub>) δ 135.7 (2 x Ph), 135.7 (2 x Ph), 135.0 (C2''), 133.7 (2 x iPh), 129.5 (Ph), 129.5 (Ph), 127.6 (2 x Ph), 127.5 (2 x Ph), 116.8 (C3'), 107.1 (C2), 85.5 (C5 or C7), 85.0 (C5 or C7), 72.6 (C3a or C8a), 72.4 (C3a or C8a), 65.8 (C9), 38.9 (C1''), 37.1 (C4a), 34.1 (C7a), 28.8 (C4 or C8), 27.7 (C4 or C8), 26.8 (tBu), 26.0 (C1'), 23.8 (C1'), 19.2 (Si-C); LC-MS (ESI<sup>+</sup>) *m/z* 529 [M+Na<sup>+</sup>], R<sub>t</sub> 2.47 min [method E]; HRMS [M+Na<sup>+</sup>] calcd for C<sub>31</sub>H<sub>42</sub>O<sub>4</sub>SiNa 529.2755 found 529.2744; Found: C, 73.58; H, 8.40%; C<sub>31</sub>H<sub>42</sub>O<sub>4</sub>Si requires: C, 73.47; H, 8.35%.

((3aS,4aS,5S,7S,7aR,8aR)-7-allyl-2,2-dimethyloctahydroisobenzofuro[5,6-d][1,3]dioxol-5-yl)methoxy)(*tert*-butyl)diphenylsilane **33a** (506 mg, 1.09 mmol) was dissolved in THF (10



mL). The solution was cooled to 0 °C under N<sub>2</sub> and TBAF (3.26 mL, 3.26 mmol, 1.0 M in THF) was added by syringe. The reaction was stirred for 3 h at 0 °C before diluted with Et<sub>2</sub>O (50 mL). The reaction mixture was washed with H<sub>2</sub>O (50 mL x 3) and extracted into Et<sub>2</sub>O (50 mL x 2). The combined organic layers were washed with brine (50 mL) and dried over MgSO<sub>4</sub>. The solvent was removed *in vacuo* to give the crude product. This was purified by column chromatography on silica gel (5% MeOH:CH<sub>2</sub>Cl<sub>2</sub>) to yield **33** as a clear oil (193 mg, 66%). [ $\alpha$ ]<sub>D</sub><sup>23</sup> +6.9 (c=1.0, CHCl<sub>3</sub>); IR (film) 3448, 2931, 1381, 1042 cm<sup>-1</sup>; <sup>1</sup>H NMR (500 MHz, CDCl<sub>3</sub>)  $\delta$  5.86 (1H, dddd, *J*=7.0, 7.0, 10.5, 17.0, H-2''), 5.16-5.06 (2H, m, H-3''), 4.45-4.40 (2H, m, H-3a, H-8a), 3.79 (1H, dd, *J*=2.5, 12.0, Ha-9), 3.63-3.51 (3H, m, Hb-9, H-7, H-5), 2.41-2.36 (2H, m, H-1''), 2.27-2.19 (1H, m, H-7a), 2.13-2.05 (1H, m, H-4a), 1.95-1.89 (2H, m, Ha-4, Ha-8), 1.46 (3H, s, H-1'), 1.33 (3H, s, H-1'), 1.32-1.21 (2H, m, Hb-4, Hb-8); <sup>13</sup>C NMR (125 MHz, CDCl<sub>3</sub>)  $\delta$  134.5 (C2''), 177.2 (C3''), 107.2 (C2), 85.7 (C5 or C7), 85.0 (C5 or C7), 72.3 (C8a or C3a), 72.3 (C8a or C3a), 64.0 (C9), 38.7 (C1''), 37.0 (C4a), 33.0 (C7a), 28.1 (C4 or C8), 27.9 (C4 or C8), 26.0 (C1'), 23.7 (C1'); LC-MS (ESI<sup>+</sup>) *m/z* 291 [M+Na<sup>+</sup>], R<sub>t</sub> 2.12 min [method D]; HRMS [M+Na<sup>+</sup>] calcd for C<sub>15</sub>H<sub>24</sub>O<sub>4</sub> Na 291.1567 found 291.1575; Found: C, 67.21; H, 9.02%; C<sub>15</sub>H<sub>24</sub>O<sub>4</sub> requires: C, 67.14; H, 9.01%.

**((3aS,4aS,5S,7S,7aR,8aR)-7-allyl-2,2-dimethyloctahydroisobenzofuro[5,6-d][1,3]dioxol-5-yl)methyl hex-5-enoate **34****

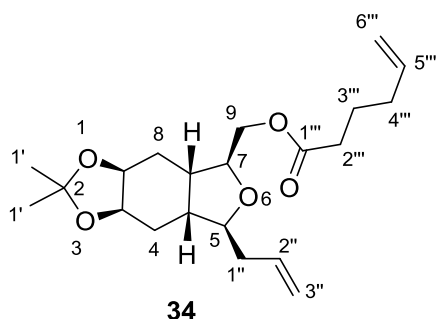

((3aS,4aS,5S,7S,7aR,8aR)-7-Allyl-2,2-dimethyloctahydroisobenzofuro[5,6-d][1,3]dioxol-5-yl)methanol **33** (92 mg, 0.343 mmol) was dissolved in CH<sub>2</sub>Cl<sub>2</sub> (3.4 mL). Hex-5-enoyl chloride (136 mg, 1.029 mmol) and triethylamine (148  $\mu$ L, 1.029 mmol) were added and the reaction mixture was stirred at RT for 18 h. The reaction mixture was diluted with CH<sub>2</sub>Cl<sub>2</sub> (10 mL) and washed with sat. aqueous NaHCO<sub>3</sub> (15 mL) and H<sub>2</sub>O (15 mL x 2). The aqueous layers were combined and extracted with CH<sub>2</sub>Cl<sub>2</sub> (10 mL x 2). The combined organic layers were dried over MgSO<sub>4</sub> and the solvents removed *in vacuo*. The crude reaction mixture was purified by column chromatography on silica gel (10% EtOAc:hexane) to yield **34** as a clear oil (116 mg, 93%). The compound was observed to decomposed on RT storage over several weeks. [ $\alpha$ ]<sub>D</sub><sup>23</sup> +10.5 (c=1.0 CHCl<sub>3</sub>); IR (film) 2937, 1732, 1381, 1163, 1040 cm<sup>-1</sup>; <sup>1</sup>H NMR (500 MHz, CDCl<sub>3</sub>)  $\delta$  5.90-5.74 (2H, m, H-2', H-5'''), 5.16-4.97 (4H, m, H-3'', H-6'''), 4.45-4.40 (2H, m, H-3a, H-8a), 4.28 (1H, dd, *J*=3.5, 12.0, Ha-9), 4.09 (1H, dd, *J*=7.0, 12.0, Hb-9), 3.64 (1H, ddd, *J*=3.5, 7.0, 7.0, H-5), 3.52 (1H, ddd, *J*=6.0, 6.0, 7.5, H-7), 2.45-2.34 (4H, m, H-2''', H-1''), 2.20-2.07 (4H, m, H-4''', H-4a, H-7a), 1.94 (2H, m, Ha-4, Ha-8), 1.76 (1H, dddd, *J*=7.0, 7.0, 7.0, 7.0, Ha-3'''), 1.75 (1H, dddd, *J*=7.0, 7.0, 7.0, 7.0, Hb-3'''), 1.46 (3H, s, H-1'), 1.34 (3H, s, H-1'), 1.33-1.20 (2H, m, Hb-4, Hb-8); <sup>13</sup>C NMR

(125 MHz, CDCl<sub>3</sub>)  $\delta$  173.5 (C1'''), 137.7 (C2' or C5'''), 137.5 (C2' or C5'''), 177.2, (C3' or C8'''), 115.3 (C3' or C8'''), 107.2 (C2), 85.2 (C7), 82.7 (C5), 72.3 (C3a or C8a), 72.2 (C3a or C8a), 65.7 (C9), 38.8 (C1''), 36.5 (C7a or C5a), 34.5 (C7a or C5a), 33.4 (C2''' or C4'''), 33.0 (C2''' or C4'''), 28.0 (C4 or C8), 28.0 (C4 or C8), 26.0 (C1'), 24.0 (C3'''), 23.7 (C1'); LC-MS (ESI<sup>+</sup>)  $m/z$  387 [M+Na<sup>+</sup>],  $R_t$  2.78 min [method D]; Found: C, 69.17; H, 8.85%; C<sub>21</sub>H<sub>32</sub>O<sub>5</sub>Na requires: C, 69.20; H, 8.85%.

**(1S,2R,4R,8S,10S,11S,18E)-6,6-dimethyl-5,7,13,21-tetraoxatetracyclo[9.9.1.0<sup>2,10</sup>.0<sup>4,8</sup>]henicos-18-en-14-one 35**

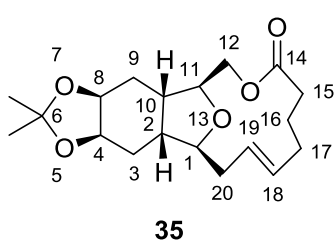

((3aS,4aS,5S,7S,7aR,8aR)-7-Allyl-2,2-dimethyloctahydroisobenzofuro[5,6-d][1,3]dioxol-5-yl)methyl hex-5-enoate **34** (53 mg, 0.145 mmol) was dissolved in CH<sub>2</sub>Cl<sub>2</sub> (100 mL, 0.0014 M). Argon was bubbled through the solution for 5 min. Grubbs II (12 mg, 0.0001 mmol, 10 mol%) was added under argon and the reaction mixture was stirred for 5 d. DMSO

(10  $\mu$ L) was added and the solution was stirred overnight. The solvents were removed *in vacuo* and the resultant mixture purified by column chromatography on silica gel (15% EtOAc:hexane) to yield **35** as a purple crystalline solid containing trace ruthenium impurities (35 mg, 51%). <sup>1</sup>H NMR (500 MHz, CDCl<sub>3</sub>)  $\delta$  5.46-5.36 (2H, m, H-18, H-19), 5.56 (1H, dd,  $J=2.0$ , 12.0, Ha-12), 4.47-4.42 (2H, m, H-8, H-4), 3.66-3.61 (2H, m, H-1, H-11), 3.46 (1H, d,  $J=12.0$ , Hb-12), 2.55-2.47 (1H, m, H-2 or H-10), 2.78-2.26 (4H, m, Ha-15, Ha-16, Ha-20, H-2 or H-10), 2.13-2.09 (3H, m, Ha-17, Hb-15, Hb-16), 1.97-1.83 (3H, m, Ha-9, Ha-3, Hb-20), 1.68-1.60 (1H, m, Hb-17), 1.53 (3H, s, H-6'), 1.37 (3H, s, H-6'), 1.38-1.21 (2H, m, Hb-9, Hb-3); <sup>13</sup>C NMR (125 MHz, CDCl<sub>3</sub>)  $\delta$  174.0 (C14), 134.8 (C18), 124.3 (C19), 107.3 (C6), 84.2 (C11 or C1), 83.6 (C11 or C1), 72.5 (C8 or C4), 72.4 (C4 or C8), 61.3 (C12), 34.6 (C17), 34.0 (C16 or C15), 33.6 (C10 or C2), 33.5 (C15 or C16), 33.3 (C10 or C2), 28.4 (C9 or C3), 28.0 (C9 or C3), 26.1 (C6'), 23.9 (C6'), 22.6 (C17); LC-MS (ESI<sup>+</sup>)  $m/z$  359 [M+Na<sup>+</sup>],  $R_t$  2.47 min [method D].

**(E)-(1S,11S,12R,14R,15S,17S)-14,15-Dihydroxy-3,18-dioxa-tricyclo[9.6.1.0<sup>12,17</sup>]octadec-8-en-4-one 36**

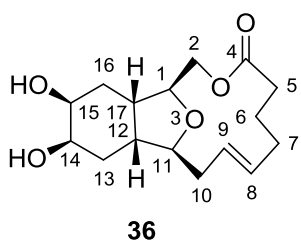

(1S,2R,4R,8S,10S,11S,18E)-6,6-Dimethyl-5,7,13,21-tetraoxatetracyclo[9.9.1.0<sup>2,10</sup>.0<sup>4,8</sup>]henicos-18-en-14-one **35** (17 mg, 0.051 mmol), was dissolved in THF (0.5 mL). HCl (0.100 mL, 1.00 mmol in H<sub>2</sub>O) was added and the solution was stirred overnight at RT. The acid and ruthenium impurities from the previous step were removed by basic ion exchange chromatography to yield **36** as an

oil (13 mg, 88%).  $[\alpha]^{24}_D$  -25.6 ( $c=1.0$  CHCl<sub>3</sub>); IR (film) 3431, 2929, 1732, 1441 cm<sup>-1</sup>; <sup>1</sup>H NMR (500 MHz, CDCl<sub>3</sub>)  $\delta$  5.42-5.34 (2H, m, H-8, H-9), 5.16 (2H, dd,  $J=2.0, 12.0$ , Ha-2), 3.91-3.79 (3H, m, H-11, H-14, H-15), 3.79-3.76 (1H, m, H-1), 3.49 (1H, dd,  $J=1.0, 12.5$ , Hb-2), 2.54-2.47 (1H, m, H-17), 2.49-2.31 (4H, m, Ha-5, Ha-6, Ha-10, H-12), 2.17-2.11 (2H, m, Hb-5, Hb-6), 2.12-1.88 (4H, m, Ha-7, Ha-13, Ha-16, Hb-10), 1.72-1.56 (3H, m, Hb-7, Hb-13, Hb-16); <sup>13</sup>C NMR (125 MHz, CDCl<sub>3</sub>)  $\delta$  173.8 (C4), 133.9 (C8), 125.3 (C9), 80.8 (C14 or C15), 80.3 (C14 or C15), 68.9 (C1 or C11), 68.4 (C1 or C11), 62.8 (C2), 37.4 (C12), 36.2 (C17), 34.6 (C5 or C6 or C10), 33.9 (C5 or C6 or C10), 33.6 (C5 or C6 or C10), 30.6 (C7 or C13 or C16), 28.6 (C7 or C13 or C16), 22.5 (C7 or C13 or C16); LC-MS (ESI<sup>+</sup>)  $m/z$  319 [M+Na<sup>+</sup>],  $R_t$  1.58 min [method D]; HRMS [M+Na<sup>+</sup>] calcd for C<sub>16</sub>H<sub>24</sub>O<sub>5</sub>Na 319.1521 found 319.1518.

**(3S,3aS,7aR)-3-(((tert-butyldiphenylsilyl)oxy)methyl)-5-methyl-3a,4,7,7a-tetrahydroisobenzofuran-1(3H)-one (37 major) and (3S,3aS,7aR)-3-(((tert-butyldiphenylsilyl)oxy)methyl)-6-methyl-3a,4,7,7a-tetrahydroisobenzofuran-1(3H)-one (37 minor)**

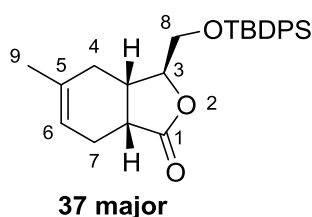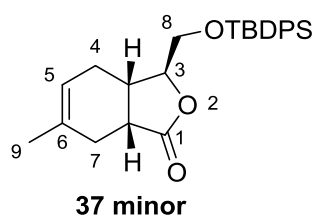

Trifluoromethanesulfonamide (465 mg, 3.13 mmol) was dissolved in CH<sub>2</sub>Cl<sub>2</sub> (3.0 mL) in a large pressure tube. Dimethylaluminium chloride (6.3 mL, 6.30 mmol) was added slowly under argon and the solution stirred for 30

min. (*S*)-5-(((*tert*-Butyldiphenylsilyloxy)methyl)furan-2-(5*H*))one **8** (1.00 g, 2.841 mmol) and isoprene (2.84 mL, 28.41 mmol) were added and the tube was sealed and heated to 60 °C for 2 d. The reaction was cooled and diluted with Et<sub>2</sub>O (100 mL). The mixture was quenched with NaOH (70 mL, 1M aq soln) and gas was evolved. The aqueous layer was extracted into Et<sub>2</sub>O (100 mL x 2) washed with brine (100 mL x 1) and dried over MgSO<sub>4</sub>. The solvent was removed *in vacuo*. The crude mixture was purified by column chromatography on silica gel (10% EtOAc:hexane) to yield an inseparable mixture of products as a clear oil (1.190 g, 100%).  $[\alpha]^{24}_D$  +4.5 ( $c=1.0$  CHCl<sub>3</sub>); IR (CDCl<sub>3</sub> solution cell) 2929, 1769, 1427, 1113 cm<sup>-1</sup>; <sup>1</sup>H NMR (500 MHz, CDCl<sub>3</sub>)  $\delta$  7.66-7.64 (4H, m, Ph), 7.49-7.40 (6H, m, Ph), 5.56-5.51 (0.85H, m, H-6 major), 5.50-5.46 (0.15H, m, H-5 minor), 4.15-4.10 (1H, m, H-3), 3.89-3.84 (1H, m, Ha-8), 3.80-3.75 (1H, m, Hb-8), 3.03 (0.15H, ddd,  $J=4.0, 8.5, 8.5$ , H-7a minor), 2.93 (0.85H, m, ddd,  $J=4.0, 8.5, 8.5$ , H-7a major), 2.77-2.70 (0.85H, m, H-3a major), 2.68-2.63 (0.15H, m, H-3a minor), 2.44-2.37 (1H, m, Ha-7), 2.35-2.27 (1H, m, Hb-7), 2.21-2.17 (0.15H, m, Ha-4 minor), 2.16 (0.85H, dd,  $J=7.5, 16.0$ , Ha-4 major), 1.95-1.88 (0.15H, m, Hb-4 minor), 1.85 (0.85H, dd,  $J=6.5, 16.5$ , Hb-4 major), 1.74 (0.45H, br.s, H-9 minor), 1.71 (2.55H, br.s, H-9 major), 1.09 (1.5H, s, <sup>t</sup>Bu), 1.07 (7.5H, s, <sup>t</sup>Bu); <sup>13</sup>C NMR (125 MHz, CDCl<sub>3</sub>)  $\delta$  184.5 (C1), 135.6 (Ph), 135.5 (Ph), 134.7, 133.2, 132.9, 132.6, 129.9, 129.6, 127.8, 127.7, 119.8, 119.2, 110.7 (C6 major),

110.2 (C5 minor), 84.7 (C3), 64.4 (C8), 37.2 (C7a), 34.8 (C3a), 30.7 (C4), 26.6 (tBu major), 26.5 (tBu minor), 23.7 (C9 major), 23.1 (C7), 22.6 (C9 minor), 14.0 (Si-C); LC-MS (ESI<sup>+</sup>) *m/z* 443 [M+Na<sup>+</sup>], R<sub>t</sub> 2.70 min [method D].

**(3S, 3aS, 5R, 6R, 7aR)-3-(tert-Butyldiphenylsilyloxymethyl)-6-hydroxy-5-methylhexahydroisobenzofuran-1-one 38**

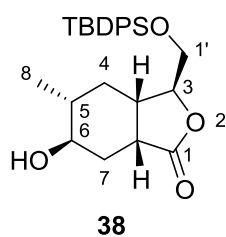

(3S,3aS,7aR)-3-(((*tert*-Butyldiphenylsilyl)oxy)methyl)-5-methyl-3a,4,7,7a-tetrahydroisobenzofuran-1(3H)-one **37** (1.17 g, 2.66 mmol) was dissolved in THF (26 mL), and cooled to -78°C. BH<sub>3</sub>.THF (5.3 mL, 5.3 mmol, 1.0 M solution in THF) was added dropwise and stirred at 0°C for 2 h. The reaction was quenched slowly with H<sub>2</sub>O (6 mL). NaOH (6 mL, 20% aqueous solution) was then added dropwise, followed by H<sub>2</sub>O<sub>2</sub> (6 mL, 30% aqueous solution). The mixture was left to stir for 30 min. Sat. sodium sulphite (40 mL) was then added, and the layers separated. The aqueous layer was extracted with Et<sub>2</sub>O (100 mL x 3). The combined organic layers were dried over MgSO<sub>4</sub> and the solvent removed *in vacuo* to yield the crude product as a clear oil. The crude reaction mixture was purified by column chromatography on silica gel (33% EtOAc:hexane) to yield **38** as a white solid (612 mg, 55%). mp (117-120°C); [α]<sub>D</sub><sup>24</sup> +8.2 (c=1.0 CHCl<sub>3</sub>); IR (film) 3421, 2932, 2859, 1772, 1428 cm<sup>-1</sup>; <sup>1</sup>H NMR (500 MHz, CDCl<sub>3</sub>) δ 7.66-7.63 (4H, m, Ph), 7.48-7.39 (6H, m, Ph), 4.05 (1H, dd, *J*=4.5, 4.5, H-3), 3.81 (1H, dd, *J*=4.5, 11.0, Ha-1'), 3.75 (1H, dd, *J*=4.0, 11.5, Hb-1'), 3.15 (1H, ddd, *J*=5.0, 10.5, 10.5, H-6), 3.09 (1H, dd, *J*=7.0, 7.0, H-7a), 2.49-2.40 (2H, m, Ha-4, Ha-7), 1.88-1.82 (1H, m, Hb-4), 1.54 (1H, ddd, *J*=7.0, 11.0, 14.0, Hb-7), 1.37 (1H, qddd, *J*=6.5, 3.0, 9.5, 12.5, H-5), 1.11-1.04 (1H, m, H-3a), 1.06 (9H, s, tBu), 1.01 (3H, d, *J*=6.5, H-8); <sup>13</sup>C NMR (125 MHz, CDCl<sub>3</sub>) δ 177.9 (C1), 135.7 (2 x Ph), 135.6 (2 x Ph), 132.7 (iPh), 132.5 (iPh), 130.0 (2 x Ph), 127.9 (2 x Ph), 127.7 (2 x Ph), 83.3 (C3), 72.5 (C6), 64.4 (C8), 39.3 (C7a), 37.2 (C5), 36.5 (C4), 36.4 (C3a), 31.7 (C7), 26.8 (tBu), 19.1 (Si-C), 17.9 (C8); LC-MS (ESI<sup>+</sup>) *m/z* 461 [M+Na<sup>+</sup>], R<sub>t</sub> 2.95 min [method D]; HRMS [M+Na<sup>+</sup>] calcd for C<sub>26</sub>H<sub>34</sub>O<sub>4</sub>SiNa 461.2119 found 461.2116; Found: C, 71.23; H, 7.75%; C<sub>26</sub>H<sub>34</sub>O<sub>4</sub>Si requires: C, 71.19; H, 7.81%.

**(1S,8E,11S,12R,14R,15R,17S)-14-hydroxy-15-methyl-3,18-dioxatricyclo[9.6.1.0<sup>12,17</sup>]octadec-8-en-4-one 39**

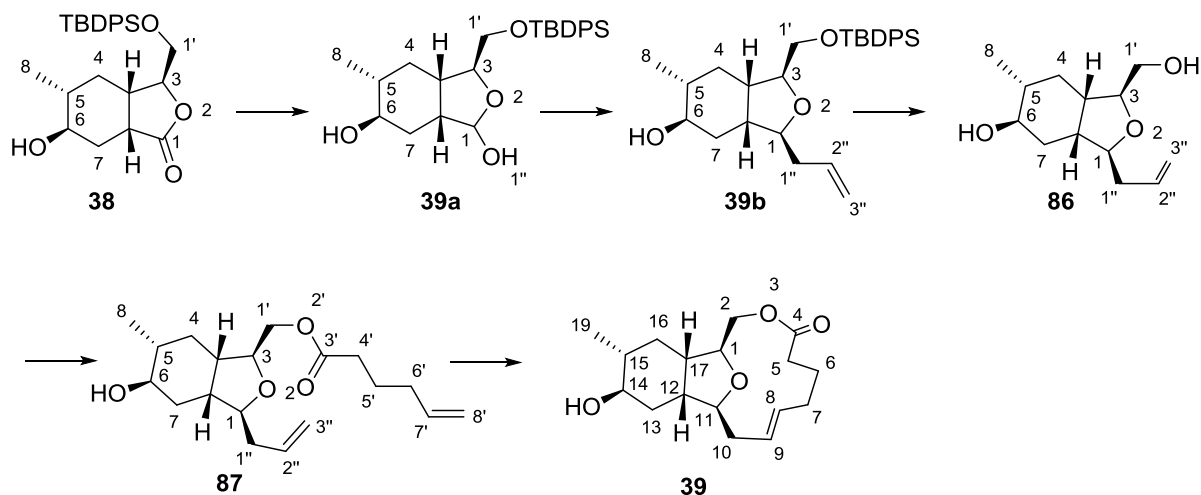

(3*S*, 3*aS*, 5*R*, 6*R*, 7*aR*)-3-(*tert*-Butyldiphenylsilyloxymethyl)-6-hydroxy-5-methylhexahydroisobenzofuran-1-one **38** (612 mg, 1.397 mmol) was dissolved in anhydrous CH<sub>2</sub>Cl<sub>2</sub> (13 mL) and cooled to -78 °C under N<sub>2</sub>. DIBAL-H (1.0 M in toluene, 1.53 mL, 1.53 mmol) was added dropwise. The reaction was stirred at -78 °C for 4 h then quenched with EtOAc (40 mL). The solution was warmed to RT and a sat. aq. solution of Rochelles salt (40 mL) was added and the mixture was stirred overnight. The aqueous layer was separated and extracted with CH<sub>2</sub>Cl<sub>2</sub> (3 x 50 mL). The organic layers were combined, dried over MgSO<sub>4</sub> and the solvent was removed *in vacuo*. NMR analysis showed only 50% conversion. Complete conversion was observed after a further 3 iterations of the above conditions. The final work up yielded a clear oil **39a** (580 mg, 94%) as an inseparable mixture of anomers. IR (film) 3312, 2930, 1428 cm<sup>-1</sup>; **MAJOR** <sup>1</sup>H NMR (500 MHz, CDCl<sub>3</sub>) δ 7.71-7.66 (4H, m, Ph), 7.47-7.37 (6H, m, Ph), 5.21 (1H, dd, *J*=6.0, 7.0, H-1), 3.81-3.78 (1H, m, H-3), 3.73-3.55 (2H, m, H-1'), 3.37-3.31 (1H, m, H-6), 2.83 (1H, d, *J*=7.5, OH), 2.34-2.28 (1H, m, H-7*a*), 2.15-2.09 (1H, m, HA-7), 1.75-1.66 (1H, m, HA-4), 1.57-1.44 (1H, m, HB-7), 1.44-1.35 (2H, m, H-5, H-3*a*), 1.11-1.05 (1H, m, HB-4), 1.09 (9H, s, <sup>t</sup>Bu), 1.03 (3H, d, *J*=6.5, H-8); <sup>13</sup>C NMR (125 MHz, CDCl<sub>3</sub>) δ 135.6 (2 x Ph), 135.6 (2 x Ph), 133.2 (iPh), 133.1 (iPh), 129.9 (2 x Ph), 127.9 (2 x Ph), 127.7 (2 x Ph), 102.1 (C1), 85.2 (C3), 72.7 (C6), 66.0 (C1''), 45.3 (C7*a*), 38.2 (C5), 37.8 (C3*a*), 35.3 (C4), 32.1 (C7), 26.8 (tBu), 19.2 (Si-C), 18.4 (C8); **MINOR** <sup>1</sup>H NMR (500 MHz, CDCl<sub>3</sub>) δ 7.71-7.66 (4H, m, Ph), 7.47-7.37 (6H, m, Ph), 5.38 (1H, dd, *J*=3.0, 5.0, H-1), 4.00-3.97 (1H, m, H-3), 3.73-3.55 (3H, m, H-1', H-6), 2.61-2.59 (1H, m, OH), 2.46-2.40 (1H, m, H-7*a*), 2.27-2.21 (1H, m, H-3*a*), 2.08-2.03 (1H, m, Ha-7), 1.75-1.66 (1H, m, HA-4), 1.57-1.44 (1H, m, Hb-7), 1.44-1.35 (1H, m, H-5), 1.11-1.05 (1H, m, Hb-4), 1.06 (9H, s, tBu), 1.04 (3H, d, *J*=6.5, H-8); <sup>13</sup>C NMR (125 MHz, CDCl<sub>3</sub>) δ 135.6 (2 x Ph), 135.6 (2 x Ph), 1.33 (iPh), 133.1 (iPh), 129.9 (2 x Ph), 127.9 (2 x Ph), 127.7 (2 x Ph), 101.1 (C1), 85.8 (C3), 73.5 (C6), 66.0 (C1'), 42.4 (C7*a*), 39.1 (C3*a*), 38.1 (C5), 35.3 (C4), 32.1 (C7), 26.8 (tBu), 19.2 (Si-C), 18.4 (C8); LC-MS (ESI<sup>+</sup>) *m/z* 463 [M+Na<sup>+</sup>], *R*<sub>t</sub> 3.00 min [method D]; HRMS [M+Na<sup>+</sup>] calcd 463.2275 for C<sub>26</sub>H<sub>36</sub>O<sub>4</sub>SiNa found 463.2279.

(3*S*,3*aS*,5*R*,6*R*,7*aR*)-3-((*tert*-Butyldiphenylsilyloxy)methyl)-5-methyloctahydroisobenzofuran-1,6-diol **39a** (569 mg, 1.293 mmol) was dissolved in CH<sub>2</sub>Cl<sub>2</sub> (13 mL) and cooled to -78 °C. BF<sub>3</sub>·OEt<sub>2</sub> (0.50 mL, 3.880 mmol) was added and the solution stirred for 5 min. Allyltrimethylsilane (0.63 mL, 3.880 mmol) was then added and the reaction warmed to RT over 18 h. The reaction was quenched with H<sub>2</sub>O (20 mL) and extracted into CH<sub>2</sub>Cl<sub>2</sub> (30 mL x 3). The combined organic layers were dried over MgSO<sub>4</sub>. The solvent was removed *in vacuo* to yield **39b** as a clear oil (549 mg, 91%). [α]<sub>D</sub><sup>20</sup> -16.4 (c=1.0 CH<sub>2</sub>Cl<sub>2</sub>); IR (film) 3384, 2929, 2885 1428 cm<sup>-1</sup>; <sup>1</sup>H NMR (500 MHz, CDCl<sub>3</sub>) δ 7.75-7.63 (4H, m, Ph), 7.48-7.37 (6H, m, Ph), 5.86 (1H, dddd, *J*=7.0, 7.0, 10.5, 17.5, H-2''), 5.11-5.02 (2H, m, H-3''), 3.85 (1H, ddd, *J*=4.0, 8.0, 10.5, H-1), 3.75 (1H, dd, *J*=4.0, 6.5, H-3), 3.60 (1H, dd, *J*=4.5, 10.5, Ha-1'), 3.50 (1H, dd, *J*=6.5, 10.5, Hb-1'), 3.28 (1H, dd, *J*=4.5, 10.5, 10.5, H-6), 2.39-2.32 (1H, m, Ha-1''), 2.24 (1H, ddd, *J*=6.5, 6.5, 12.5, H-3a), 2.18 (1H, ddd, *J*=7.0, 7.5, 14.5, Hb-1''), 2.10-2.04 (1H, m, H-7a), 1.93 (1H, ddd, *J*=2.0, 5.0, 14.0, Ha-7), 1.69 (1H, ddd, *J*=3.0, 5.5, 12.5, Ha-4), 1.55-1.49 (1H, m, Hb-7), 1.47-1.35 (1H, m, H-5), 1.29 (1H, ddd, *J*=12.5, 12.5, 12.5, Hb-4), 1.07 (9H, s, <sup>t</sup>Bu), 1.05 (3H, d, *J*=6.5, H-8); <sup>13</sup>C NMR (125 MHz, CDCl<sub>3</sub>) δ 135.6 (4 x Ph), 135.4 (C2''), 133.7 (iPh), 133.6 (iPh), 129.7 (Ph), 129.6 (Ph), 127.9 (2 x Ph), 127.7 (2 x Ph), 116.8 (C3''), 84.6 (C3), 79.6 (C1), 72.6 (C6), 66.1 (C1'), 42.6 (C7a), 40.6 (C3a), 39.2 (C1''), 39.0 (C5), 36.3 (C4), 32.8 (C7), 26.8 (<sup>t</sup>Bu), 19.2 (Si-C), 18.2 (C8); LC-MS (ESI<sup>+</sup>) *m/z* 487 [M+Na<sup>+</sup>], R<sub>t</sub> 3.25 min [method D]; HRMS [M+Na<sup>+</sup>] calcd for C<sub>29</sub>H<sub>40</sub>O<sub>3</sub>SiNa 487.2638 found 487.2647; Found: C, 74.87; H, 8.59%; C<sub>29</sub>H<sub>40</sub>O<sub>3</sub>Si requires: C, 74.95; H, 8.68%.

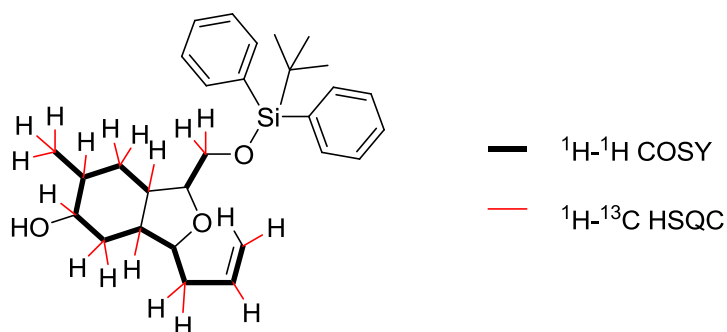

(1*S*,3*S*,3*aR*,5*R*,6*R*,7*aS*)-3-Allyl-1-((*tert*butyldiphenylsilyloxy)methyl)-6-methyloctahydroisobenzofuran-5-ol **39b** (549 mg, 1.362 mmol) was dissolved in THF (13 mL). The solution was cooled to 0 °C under N<sub>2</sub> and TBAF (4.00 mL, 4.00 mmol, 1.0 M in THF) was added. The reaction was stirred for 4 h at 0 °C before diluting with Et<sub>2</sub>O (50 mL). The reaction mixture was washed with H<sub>2</sub>O (3 x 50 mL) and extracted into Et<sub>2</sub>O (2 x 50 mL). The combined organic layers were washed with brine (50 mL) and dried over MgSO<sub>4</sub>. The solvent was removed *in vacuo* to give the crude product. This was purified by column chromatography on silica gel (5% MeOH:CH<sub>2</sub>Cl<sub>2</sub>) to yield **86** as a clear oil (160 mg, 52%). [α]<sub>D</sub><sup>20</sup> -30.7 (c=1.0 CH<sub>2</sub>Cl<sub>2</sub>); IR (film) 3368, 2922, 1456, 1031 cm<sup>-1</sup>; <sup>1</sup>H NMR (500 MHz, CDCl<sub>3</sub>) δ 5.88 (1H, dddd, *J*=7.0, 7.0, 10.0, 17.0, H-2''), 5.15-5.09 (2H, m, H-3''), 3.92 (1H, ddd, *J*=4.0,

7.0, 10.5, H-1), 3.72-3.70 (1H, m, H-3), 3.53 (1H, dd,  $J=4.0, 11.0$ , Ha-1'), 3.43 (1H, dd,  $J=7.0, 11.5$ , Hb-1'), 3.31 (1H, ddd,  $J=4.5, 10.0, 10.0$ , H-6), 2.48-2.42 (1H, m, Ha-1''), 2.24-2.17 (1H, m, Hb-1''), 2.16-2.10 (1H, m, H-7a), 2.04 (1H, ddd,  $J=6.5, 6.5, 13.0$ , H-3a), 1.93 (1H, ddd,  $J=2.5, 4.5, 14.0$ , Ha-7), 1.72 (1H, ddd,  $J=3.0, 6.0, 14.0$ , Ha-4), 1.56 (1H, ddd,  $J=6.0, 11.0, 14.0$ , Hb-7), 1.38 (1H, dqdd,  $J=3.0, 6.5, 10.0, 13.0$ , H-5), 1.19 (1H, ddd,  $J=13.0, 13.0, 14.0$ , Hb-4), 1.04 (3H, d,  $J=6.5$ , H-8);  $^{13}\text{C}$  NMR (125 MHz,  $\text{CDCl}_3$ )  $\delta$  134.5 (C2''), 117.5 (C3''), 84.5 (C3), 79.7 (C1), 72.4 (C6), 65.5 (C1'), 42.8 (C3a), 40.5 (C7a), 38.8 (C5), 38.7 (C1''), 36.0 (C4), 32.7 (C7), 18.2 (C8); LC-MS (ESI<sup>+</sup>)  $m/z$  271 [ $\text{M}+\text{Na}^+$ ],  $R_t$  2.55 min [method D].

((1S,3S,3aR,5R,6R,7aS)-3-Allyl-1-(hydroxymethyl)-6-methyloctahydroisobenzofuran-5-ol **86** (50 mg, 0.221 mmol) was dissolved in  $\text{CH}_2\text{Cl}_2$  (1.2 mL). Hex-5-enoyl chloride (32 mg, 0.243 mmol) and triethylamine (95  $\mu\text{L}$ , 0.663 mmol) were added and the reaction mixture was stirred at RT for 18 h. TLC analysis indicated the presence of starting material, therefore a further quantity of hex-5-enoyl chloride (32 mg, 0.243 mmol) was added and the solution was stirred for a further 5 h. The reaction mixture was diluted with  $\text{CH}_2\text{Cl}_2$  (10 mL) and washed with  $\text{H}_2\text{O}$  (10 mL) and brine (10 mL). The aqueous layers were combined and extracted with  $\text{CH}_2\text{Cl}_2$  (10 mL x 2). The combined organic layers were dried over  $\text{MgSO}_4$  and the solvents removed *in vacuo*. Purification by column chromatography (33% EtOAc:hexane) gave **87** (30 mg, 42%) as a clear oil.  $[\alpha]_D^{20}$  -25.0 ( $c=0.5$ ,  $\text{CH}_2\text{Cl}_2$ ); IR (film) 3444, 2924, 1438, 1642, 1455  $\text{cm}^{-1}$ ;  $^1\text{H}$  NMR (500 MHz,  $\text{CDCl}_3$ )  $\delta$  5.87 (1H, dddd,  $J=7.0, 7.0, 10.0, 17.0$ , H-2''), 5.78 (1H, dddd,  $J=6.5, 6.5, 10.0, 17.0$ , H-7'), 5.13-4.98 (4H, m, H-3'', H-8'), 4.01 (1H, dd,  $J=6.0, 11.0$ , Ha-1'), 3.96 (1H, dd,  $J=5.5, 11.0$ , Hb-1'), 3.90 (1H, ddd,  $J=4.0, 7.0, 10.5$ , H-1), 3.82 (1H, dd,  $J=6.0, 6.0$ , H-3), 3.33 (1H, ddd,  $J=4.5, 10.5, 10.5$ , H-6), 2.45-2.39 (1H, m, Ha-1''), 2.39 (2H, t,  $J=7.5$ , H-4'), 2.23-2.03 (5H, m, Hb-1'', H-6', H-3a, H-7a), 1.96 (1H, ddd,  $J=2.0, 4.5, 14.0$ , Ha-7), 1.78-1.69 (3H, m, H-4A, Ha-5'), 1.56 (2H, ddd,  $J=7.0, 10.5, 14.0$ , H-7, OH), 1.39 (1H, dqdd,  $J=3.0, 6.5, 9.5, 12.5$ , H-5), 1.20 (1H, ddd,  $J=14.0, 14.0, 14.0$ , HB-4), 1.03 (3H, d,  $J=6.5$ , H-8);  $^{13}\text{C}$  NMR (125 MHz,  $\text{CDCl}_3$ )  $\delta$  173.4 (C3'), 137.6 (C7''), 134.7 (C2''), 117.2 (C3''), 115.4 (C8'), 81.6 (C3), 79.9 (C1), 72.3 (C6), 66.3 (C1'), 42.4 (C3a or C7a), 41.1 (C3a or C7a), 38.9 (C1''), 38.8 (C5), 35.9 (C4), 33.5 (C4'), 33.0 (C6'), 32.7 (C7), 24.0 (C5'), 18.0 (C8); LC-MS (ESI<sup>+</sup>)  $m/z$  345 [ $\text{M}+\text{Na}^+$ ],  $R_t$  2.62 min [method D]; HRMS [ $\text{M}+\text{Na}^+$ ] calcd for  $\text{C}_{19}\text{H}_{30}\text{O}_4\text{Na}$  345.2036 found 345.2046; Found: C, 70.73%; H, 9.35%;  $\text{C}_{19}\text{H}_{30}\text{O}_4$  requires: C, 70.77%; H, 9.38%.

((1S,3S,3aR,5R,6R,7aS)-3-Allyl-5-hydroxy-6-methyloctahydroisobenzofuran-1-yl)methyl hex-5-enoate **87** (26 mg, 0.081 mmol) was dissolved in  $\text{CH}_2\text{Cl}_2$  (160 mL, 0.0005 M). Argon was bubbled through the solution for 5 min. Grubbs II (7 mg, 0.008 mmol, 10 mol%) was added under argon and the reaction mixture was stirred for 3 d. DMSO (10  $\mu\text{L}$ ) was added and the solution was stirred overnight. The solvents were removed *in vacuo* and the resultant mixture purified by column chromatography on silica gel (15% EtOAc:hexane) to yield **39** as a clear oil (19 mg, 80%).  $[\alpha]_D^{24}$  -20.8 ( $c=1.0$   $\text{CHCl}_3$ ); IR (film) 3432, 2919, 1738, 1446  $\text{cm}^{-1}$ ;  $^1\text{H}$  NMR (500 MHz,  $\text{CDCl}_3$ )  $\delta$  5.42-5.35 (2H, m, H-8, H-9), 5.13 (1H, dd,  $J=3.0, 12.0$ , Ha-2), 3.94 (1H, ddd,  $J=3.0, 3.0, 11.0$ , H-11), 3.69 (1H, m, H-1), 3.42 (1H, d,  $J=12.0$ , Hb-2), 3.30 (1H, ddd,

$J=5.0, 11.0, 11.0, H-14$ ), 2.49-2.34 (4H, m, Ha-7, Ha-10, H-12, Ha-5 or Ha-6), 2.28-2.22 (1H, m, H-17), 2.17-2.03 (3H, m, Hb-7, Hb-10, Ha-5 or Ha-6), 1.95-1.87 (2H, m, Ha-13, Hb-5 or Hb-6), 1.74-1.70 (1H, m, Ha-16), 1.71-1.57 (2H, m, Hb-13, Hb-5 or Hb-6), 1.45-1.38 (1H, m, Ha-15), 1.18 (1H, ddd,  $J=13.0, 13.0, 13.0$ , Hb-16), 1.03 (3H, d,  $J=6.5$ , H-19);  $^{13}\text{C}$  NMR (125 MHz,  $\text{CDCl}_3$ )  $\delta$  173.9 (C4), 133.1 (C8), 125.8 (C9), 81.9 (C1), 79.2 (C11), 72.5 (C14), 64.4 (C2), 41.5 (C17), 39.3 (C12), 38.9 (C15), 36.8 (C16), 33.8 (C5 or C6), 33.0 (C7), 32.3 (C10 or C13), 32.3 (C10 or C13), 21.8 (C5 or C6), 18.1 (C19); LC-MS (ESI<sup>+</sup>)  $m/z$  317 [M+Na<sup>+</sup>],  $R_t$  1.90 min [method D]; HRMS [M+Na<sup>+</sup>] calcd for  $\text{C}_{17}\text{H}_{26}\text{O}_4\text{Na}$  317.1723 found 317.1726.

**(1R,2S,3S,10E,13S,14R,15S)-5,20-dioxatetracyclo[13.2.2.1<sup>3,13</sup>.0<sup>2,14</sup>]icosa-10,16-dien-6-one**  
**40**

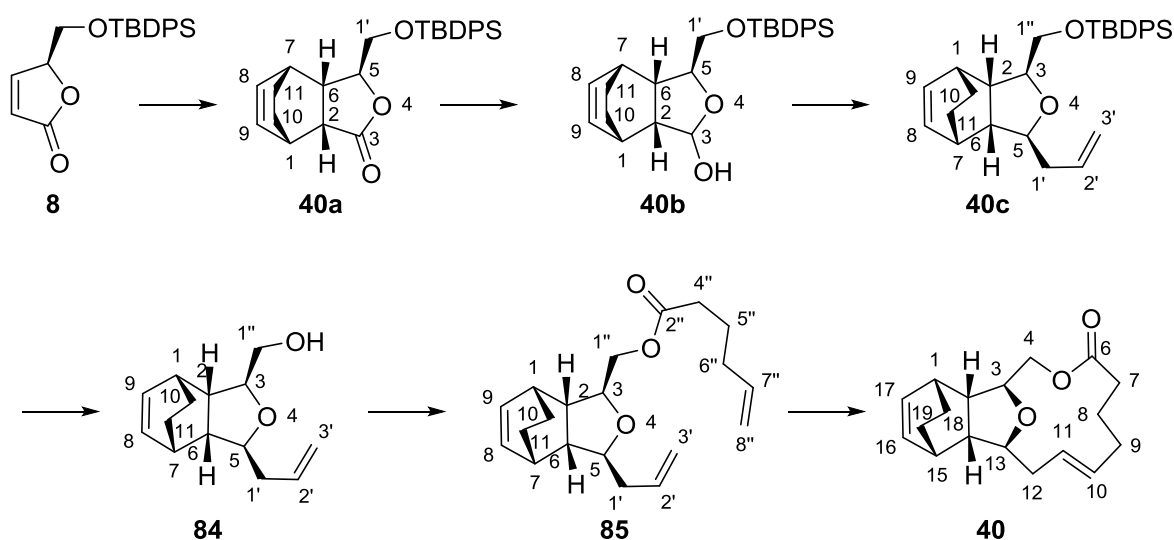

Trifluoromethanesulfonamide (465 mg, 3.12 mmol) was dissolved in  $\text{CH}_2\text{Cl}_2$  (3.0 mL) in a pressure tube. Dimethylaluminium chloride (6.2 mL, 6.2 mmol) was added slowly under argon and the solution stirred for 30 min. (*S*)-5-((*tert*-Butyldiphenylsilyloxy)methyl)furan-2-(5*H*)one **8** (1.00 g, 2.841 mmol) and cyclohexadiene (2.7 mL, 28.4 mmol) were added and the tube was sealed and heated to 60 °C for 2 d. The reaction was cooled and diluted with  $\text{Et}_2\text{O}$  (100 mL), the mixture was quenched with NaOH (70 mL, 1M aq sol) and gas was evolved. The aqueous layer was extracted into  $\text{Et}_2\text{O}$  (100 mL x 2) washed with brine (100 mL x 1) and dried over  $\text{MgSO}_4$ . The solvent was removed *in vacuo*. The crude mixture was purified by column chromatography on silica gel (10% EtOAc:hexane) to yield **40a** a clear oil (930 mg, 75%).  $[\alpha]_D^{23.7} +10.0$  ( $c=1.0$   $\text{CHCl}_3$ ); IR (film) 2934, 1767 (C=O)  $\text{cm}^{-1}$ ;  $^1\text{H}$  NMR (500 MHz,  $\text{CDCl}_3$ )  $\delta$  7.69-7.64 (4H, m, Ph), 7.48-7.39 (6H, m, Ph), 6.35-6.31 (1H, m, H-9), 6.27-6.23 (1H, m, H-8), 4.04 (1H, dd,  $J=3.5, 6.5$ , H-5), 3.80 (1H, dd,  $J=4.0, 11.0$ , Ha-1'), 3.67 (1H, dd,  $J=3.0, 11.0$ , Hb-1'), 3.10-3.06 (1H, m, H-1), 2.83 (1H, dd,  $J=3.5, 10.0$ , H-2), 2.67-2.63 (1H, m, H-7), 2.58 (1H, ddd,  $J=3.5, 3.5, 10.0$ , H-6), 1.62-1.56 (1H, m, Ha-10), 1.52-1.57 (1H, m, Ha-11), 1.35 (1H, dddd,  $J=3.0, 3.0, 12.0, 12.0$ , Hb-10), 1.30 (1H, dddd,  $J=3.0, 3.0, 12.0, 12.0$ , Hb-



11), 1.07 (9H, s, <sup>t</sup>Bu); <sup>13</sup>C NMR (125 MHz, CDCl<sub>3</sub>) δ 178.8 (C3), 135.7 (2 x Ph), 135.6 (2 x Ph), 134.2 (C9), 133.2 (iPh), 132.7 (C8), 132.6 (iPh) 129.9 (2 x Ph), 127.8 (2 x Ph), 127.8 (2 x Ph), 84.3 (C5), 65.4 (C1'), 46.3 (C2), 41.0 (C6), 33.3 (C7), 31.7 (C1), 26.7 (<sup>t</sup>Bu), 23.7 (C10), 23.3 (C11), 19.2 (Si-C); LC-MS (ESI<sup>+</sup>) *m/z* 455 [M+Na<sup>+</sup>], R<sub>t</sub> 2.68 min [method D]; HRMS [M+Na<sup>+</sup>] calcd for C<sub>27</sub>H<sub>32</sub>O<sub>3</sub>SiNa 455.2013 found 455.2010; Found: C, 74.90; H, 7.42%; C<sub>27</sub>H<sub>32</sub>O<sub>3</sub>Si requires: C, 74.96; H, 7.49%.

(1S,2R,5S,6S,7R)-5-(*tert*-Butyldiphenylsilyloxymethyl)-4-oxatricyclo[5.2.2.0<sup>2,6</sup>]undec-8-en-3-one **40a** (481 mg, 1.113 mmol) was dissolved in anhydrous CH<sub>2</sub>Cl<sub>2</sub> (5.6 mL) and cooled to -78 °C under N<sub>2</sub>. DIBAL-H (1.0 M in toluene, 1.23 mL, 1.23 mmol) was added dropwise. The reaction was stirred at -78 °C for 3 h then quenched with EtOAc (10 mL). The solution was warmed to RT and a sat. aq. solution of Rochelles salt (6 mL) was added and the mixture stirred overnight. The aqueous layer was separated and extracted with CH<sub>2</sub>Cl<sub>2</sub> (20 mL x 3). The organic layers were combined, dried over MgSO<sub>4</sub> and the solvent was removed *in vacuo*. The crude mixture was purified by column chromatography on silica gel (15% EtOAc:hexane) to yield a clear oil **40b** (530 mg, 86%) as the kinetic anomer which converts to a mixture of anomers overnight in CDCl<sub>3</sub>. [α]<sub>D</sub><sup>23.7</sup> -15.6 (c=1.0 CHCl<sub>3</sub>); IR (film) 3411, 2933, 1472, 1427 cm<sup>-1</sup>; <sup>1</sup>H NMR (500 MHz, CDCl<sub>3</sub>) δ **Anomer A** 7.74-7.66 (4H, m, Ph), 7.49-7.36 (6H, m, Ph), 6.28-6.20 (2H, m, H-9, H-8), 5.01 (1H, s, H-3), 3.82-3.76 (2H, m, H-5, Ha-1'), 3.58 (1H, dd, *J*=2.0, 10.0, Hb-1'), 2.79-2.75 (1H, m, H-1), 2.53-2.48 (1H, m, H-7), 2.41-2.38 (2H, m, H-2, H-6), 1.56-1.14 (4H, m, H-10, H-11), 1.12 (9H, s, <sup>t</sup>Bu); **Anomer B** 7.74-7.66 (4H, m, Ph), 7.49-7.36 (6H, m, Ph), 6.25-6.18 (1H, m, H-9 or H-8), 6.11-6.08 (1H, m, H-9 or H-8), 4.80 (1H, d, *J*=2.0, H-3), 3.74-3.67 (2H, m, H-5, Ha-1'), 3.61-3.52 (1H, m, Hb-1'), 2.57-2.53 (1H, m, H-1 or H-7), 2.44-2.41 (1H, m, H-1 or H-7), 2.34 (1H, ddd, *J*=3.5, 3.5, 10.0, H-6), 2.14 (1H, ddd, *J*=2.0, 3.5, 10.0 H-2), 1.56-1.14 (4H, m, H-10, H-11), 1.09 (9H, s, <sup>t</sup>Bu); <sup>13</sup>C NMR (125 MHz, CDCl<sub>3</sub>) δ 135.8 (2 x Ph A or B), 135.7 (2 x Ph A or B), 135.6 (2 x Ph A or B), 135.5 (2 x Ph A or B), 133.8 (iPh A or B), 133.8 (iPh A or B), 133.4 (C8 or C9, A or B), 133.2 (C8 or C9, A or B), 133.2 (C8 or C9, A or B), 133.0 (C8 or C9, A or B), 130.0 (Ph A or B), 129.9 (Ph A or B), 129.6 (Ph A or B), 127.8 (Ph A or B), 127.6 (Ph A or B), 127.6 (Ph A or B), 105.7 (C3B), 104.6 (C3A), 86.5 (C5A), 85.6 (C5A), 67.3 (C1' A or B), 67.1 (C1' A or B), 55.5 (C6A or C2A), 52.2 (C6B or C2B), 47.3 (C6B or C2B), 46.1 (C6A or C2A), 33.9 (C1 or C7, A or B), 33.9 (C1 or C7, A or B), 32.3 (C1A or C7A), 31.5 (C1A or C7A), 27.0 (<sup>t</sup>Bu A or B), 26.9 (<sup>t</sup>Bu A or B), 24.5 (C10 or C11, A or B), 24.5 (C10 or C11, A or B), 23.9 (C10 or C11, A or B), 19.3 (Si-C, A or B), 19.2 (Si-C, A or B); LC-MS (ESI<sup>+</sup>) *m/z* 457 [M+Na<sup>+</sup>], R<sub>t</sub> 2.78 min [method D]; HRMS [M+Na<sup>+</sup>] calcd for C<sub>27</sub>H<sub>34</sub>O<sub>3</sub>SiNa 457.2169 found 457.2167; Found: C, 74.57; H, 7.92%; C<sub>27</sub>H<sub>34</sub>O<sub>3</sub>Si requires: C, 74.57; H, 7.92%.

(1S,2R,5S,6S,7R)-5-(*tert*-Butyldiphenylsilyloxymethyl)-4-oxa-tricyclo[5.2.2.0<sup>2,6</sup>]undec-8-en-3-ol **40b** (74 mg, 0.734 mmol) was dissolved in CH<sub>2</sub>Cl<sub>2</sub> (2.0 mL) and cooled to -78 °C. BF<sub>3</sub>·OEt<sub>2</sub> (0.065 mL, 0.51 mmol) was added by syringe and the solution stirred for 5 min. Allyltrimethylsilane (0.083 mL, 0.51 mmol) was added by syringe and the reaction then warmed to RT over 18 h. The reaction was then quenched with H<sub>2</sub>O (6 mL) and extracted

into CH<sub>2</sub>Cl<sub>2</sub> (6 mL x 3). The combined organic layers were dried over MgSO<sub>4</sub>. The solvent was removed in vacuo to yield **40c** as a clear oil (60 mg, 76%). [ $\alpha$ ]<sup>23.7</sup><sub>D</sub> +5.5 (c=1.0 CH<sub>2</sub>Cl<sub>2</sub>); IR (film) 3046, 2932, 2860, 1472, 1428 cm<sup>-1</sup>; <sup>1</sup>H NMR (500 MHz, CDCl<sub>3</sub>)  $\delta$  7.76-7.71 (4H, m, Ph), 7.47-7.38 (6H, m, Ph), 6.22-6.19 (2H, m, H-8, H-9), 5.88 (1H, dddd, *J*=7.0, 7.0, 10.0, 17.0, H-2'), 5.15-5.05 (2H, m, H-3'), 3.80 (1H, dd, *J*=5.0, 10.5, Ha-1''), 3.70 (1H, dd, *J*=5.0, 10.5, Hb-1''), 3.60 (1H, ddd, *J*=5.0, 5.0, 8.0, H-3), 3.55 (1H, ddd, *J*=6.0, 6.0, 8.0, H-5), 2.55-2.49 (2H, m, H-1, H-7), 2.41-2.28 (2H, m, H-1''), 2.25 (1H, ddd, *J*=3.0, 8.0, 11.0, H-2), 2.05 (1H, ddd, *J*=3.0, 8.0, 11.0, H-6), 1.50-1.42 (2H, m, Ha-10, Ha-11), 1.34-1.26 (2H, m, Hb-10, Hb-11), 1.10 (9H, s, <sup>t</sup>Bu); <sup>13</sup>C NMR (125 MHz, CDCl<sub>3</sub>)  $\delta$  135.7 (2 x Ph), 135.7 (2 x Ph), 135.3 (C2'), 134.3 (C8 or C9), 134.1 (C8 or C9), 133.8 (iPh), 133.8 (iPh), 129.5 (2 x Ph), 127.6 (4 x Ph), 116.5 (C3'), 83.6 (C3), 82.9 (C5), 66.3 (C1''), 51.9 (C6), 49.6 (C2), 39.8 (C1'), 32.1 (C1 or C7), 31.9 (C1 or C7), 26.9 (<sup>t</sup>Bu), 24.6 (C10 or C11), 24.6 (C10 or C11), 19.3 (Si-C); LC-MS (ESI<sup>+</sup>) *m/z* 481 [M+Na<sup>+</sup>], R<sub>t</sub> 3.35 min [method E]; HRMS [M+Na<sup>+</sup>] calcd for C<sub>30</sub>H<sub>38</sub>O<sub>2</sub>SiNa 481.2533 found 481.2547; Found: C, 78.56; H, 8.29%; C<sub>30</sub>H<sub>38</sub>O<sub>2</sub>Si requires: C, 78.55; H, 8.35%.

((1R, 2S, 3S, 5S, 6R, 7S)-5-allyl-4-oxatricyclo[5.2.2.0<sup>2,6</sup>]undec-8-en-3-ylmethoxy)tertbutyldiphenylsilane **40c** (969 mg, 2.173 mmol) was dissolved in THF (22 mL). The solution was cooled to 0 °C under N<sub>2</sub> and TBAF (6.5 mL, 6.5 mmol, 1.0 M in THF) was added by syringe. The reaction was stirred for 3.5 h at 0 °C before diluting with Et<sub>2</sub>O (50 mL). The reaction mixture was washed with H<sub>2</sub>O (3 x 50 mL) and extracted into Et<sub>2</sub>O (3 x 50 mL). The combined organic layers were dried over MgSO<sub>4</sub> and the solvent was removed *in vacuo* to give the crude product. This was purified by column chromatography on silica gel (50% EtOAc:hexane) to yield **84** as a clear oil (332 mg, 72%). [ $\alpha$ ]<sup>23.7</sup><sub>D</sub> -23.5 (c=1.0 CHCl<sub>3</sub>); IR (film) 3431, 2936 cm<sup>-1</sup>; <sup>1</sup>H NMR (500 MHz, CDCl<sub>3</sub>)  $\delta$  6.22-6.16 (2H, m, H-8, H-9), 5.84 (1H, dddd, *J*=7.0, 7.0, 10.0, 17.0, H-2'), 5.14-5.04 (2H, m, H-3'), 3.79-3.73 (1H, m, Ha-1''), 3.58-3.51 (3H, m, Hb-1'', H-3, H-5), 2.52-2.45 (2H, m, H-1, H-7), 2.39-2.27 (3H, m, H-1', OH), 2.25-2.19 (1H, m, H-2), 2.08-1.98 (1H, m, H-6), 1.49-1.38 (2H, m, Ha-10, Ha-11), 1.34-1.24 (2H, m, Hb-10, Hb-11); <sup>13</sup>C NMR (125 MHz, CDCl<sub>3</sub>)  $\delta$  134.8 (C2'), 134.2 (C8 or C9), 134.1 (C8 or C9), 116.9 (C3'), 83.9 (C3 or C5), 83.0 (C3 or C5), 64.0 (C1''), 52.0 (C6), 47.6 (C2), 39.4 (C1'), 31.8 (C1 or C7), 31.6 (C1 or C7), 24.5 (C10 or C11), 24.5 (C10 or C11); LC-MS (ESI<sup>+</sup>) *m/z* 243.24 [M+Na<sup>+</sup>], R<sub>t</sub> 2.22 min [method D]; HRMS [M+H<sup>+</sup>] calcd for C<sub>14</sub>H<sub>21</sub>O<sub>2</sub> 221.1536 found 221.1538; Found: C, 76.21; H, 9.15%; C<sub>14</sub>H<sub>20</sub>O<sub>2</sub> requires: C, 76.33; H, 9.15%.

((1R, 2S, 3S, 5S, 6R, 7S)-5-Allyl-4-oxatricyclo[5.2.2.0<sup>2,6</sup>]undec-8-en-3-yl)-methanol **84** (82 mg, 0.372 mmol) was dissolved in CH<sub>2</sub>Cl<sub>2</sub> (3.0 mL). Hex-5-enoyl chloride (152 mg, 1.112 mmol) and triethylamine (160  $\mu$ L, 1.112 mmol) were added and the reaction mixture was stirred at RT for 36 h. The reaction mixture was diluted with CH<sub>2</sub>Cl<sub>2</sub> (10 mL) and washed with H<sub>2</sub>O (10 mL x 2) and brine (10 mL). The aqueous layers were combined and extracted with CH<sub>2</sub>Cl<sub>2</sub> (10 mL x 2). The combined organic layers were washed with brine (10 mL), dried with MgSO<sub>4</sub> and the solvents removed *in vacuo*. The crude reaction mixture was purified by column chromatography on silica gel (10% EtOAc:hexane) to yield **85** as a clear oil (81 mg, 70%).

$[\alpha]^{23.7}_D +3.4$  ( $c=1.0$   $\text{CHCl}_3$ ); IR (film) 2938, 2868, 1737  $\text{cm}^{-1}$ ;  $^1\text{H}$  NMR (500 MHz,  $\text{CDCl}_3$ )  $\delta$  6.23-6.18 (2H, m, H-9, H-8), 5.89-5.75 (2H, m, H-2', H-7''), 5.14-4.94 (4H, m, H-3', H-8''), 4.25 (1H, dd,  $J=3.5, 11.5$ , Ha-1''), 4.03 (1H, dd,  $J=7.0, 11.5$ , Hb-1''), 3.66 (1H, ddd,  $J=3.5, 7.0, 7.0$ , H-3), 3.55 (1H, ddd,  $J=6.5, 6.5, 6.5$ , H-5), 2.55-2.49 (2H, m, H-1, H-7), 2.45-2.34 (2H, m, H-1, H-7), 2.34-2.27 (4H, m, H-1', H-4''), 2.14-2.04 (4H, m, H-2, H-6, H-6''), 1.78-1.73 (2H, m, H-5''), 1.48-1.43 (2H, m, Ha-10, Ha-11), 1.36-1.25 (2H, m, Hb-10, Hb-11),  $^{13}\text{C}$  NMR (125 MHz,  $\text{CDCl}_3$ )  $\delta$  173.6 (C2''), 137.2 (C2' or C7''), 134.7 (C2' or C7''), 134.5 (C8 or C9), 133.9 (C8 or C9), 116.9 (C8'' or C3'), 115.3 (C8'' or C3'), 83.2 (C5), 80.9 (C3), 66.1 (C1''), 51.4 (C2 or C6), 49.3 (C2 or C6), 39.4 (C1'), 33.5 (C4''), 33.0 (C6''), 31.8 (C1 or C6), 31.6 (C1 or C6), 24.5 (C10 or C11), 24.5 (C10 or C11), 24.0 (C5''); LC-MS (ESI<sup>+</sup>)  $m/z$  339 [M+Na<sup>+</sup>],  $R_t$  3.05 min [method D]; HRMS [M+H<sup>+</sup>] calcd for  $\text{C}_{20}\text{H}_{29}\text{O}_3$  317.2111 found 317.2107.

(1R,2S,3S,5S,6R,7S)-5-Allyl-4-oxatricyclo[5.2.2.0<sup>2,6</sup>]undec-8-en-3-ylmethyl hex-5-enoate **85** (30 mg, 0.095 mmol) was dissolved in  $\text{CH}_2\text{Cl}_2$  (94 mL, 0.001 M). Argon was bubbled through the solution for 5 min. Grubbs II (8 mg, 0.0095 mmol, 10 mol%) was added under argon and the reaction mixture was stirred for 5 d. DMSO (10  $\mu\text{L}$ ) was added and the solution was stirred overnight. The solvents were removed *in vacuo* and the resultant mixture purified by column chromatography on silica gel (15% EtOAc:hexane) to yield **40** as a crystalline solid (14 mg, 51%). mp (129-134 °C);  $[\alpha]^{24}_D -60.2$  ( $c=1.0$   $\text{CHCl}_3$ ); IR (film) 2930, 2865, 1738, 1433  $\text{cm}^{-1}$ ;  $^1\text{H}$  NMR (500 MHz,  $\text{CDCl}_3$ )  $\delta$  6.28-6.14 (2H, m, H-17, H-16), 5.46 (1H, dddd,  $J=1.5, 4.5, 10.0, 15.0$ , H-11), 5.37 (1H, dddd,  $J=1.0, 4.0, 11.0, 15.0$ , H-10), 5.18 (1H, dd,  $J=2.0, 11.5$ , Ha-4), 3.67-3.60 (2H, m, H-3, H-13), 3.44 (1H, d,  $J=11.5$ , Hb-4), 2.54-2.48 (3H, m, H-2, H-14, H-1 or H-15), 2.45-2.33 (3H, m, Ha-12, Ha-9, Ha-7), 2.29 (1H, ddd,  $J=3.0, 7.5, 10.5$ , H-1 or H-15), 2.12-2.01 (3H, m, Ha-8, Hb-7, Hb-12), 1.90-1.81 (1H, m, Hb-9), 1.67-1.60 (1H, m, Hb-8), 1.55-1.47 (2H, m, H-19 or H-18), 1.35-1.29 (2H, m, H-19 or H-18);  $^{13}\text{C}$  NMR (125 MHz,  $\text{CDCl}_3$ )  $\delta$  173.9 (C6), 134.7 (C16 or C17 or C10), 134.6 (C16 or C17 or C10), 134.1 (C16 or C17 or C10), 124.4 (C11), 82.7 (C3 or C13), 82.1 (C3 or C13), 61.3 (C4), 48.6 (C1 or C15), 47.8 (C1 or C15), 34.9 (C7 or C12 or C9), 34.7 (C7 or C12 or C9), 33.6 (C7 or C8 or C9), 32.1 (C2 or C14), 31.7 (C2 or C14), 24.6 (C18 or C19), 24.3 (C18 or C19), 22.4 (C8); LC-MS (ESI<sup>+</sup>)  $m/z$  311 [M+Na<sup>+</sup>],  $R_t$  2.87 min [method D]; HRMS [M+H<sup>+</sup>] calcd for  $\text{C}_{17}\text{H}_{25}\text{O}_3$  289.1804 found 289.1798; Found: C, 73.81; H, 8.63%;  $\text{C}_{18}\text{H}_{24}\text{O}_3$  requires: C, 73.88; H, 8.75%.

**(1R,7E/R,10S,11R,12R,15S,16S)-2,17-dioxatetracyclo[8.6.1.1<sup>12,15</sup>.0<sup>11,16</sup>]octadec-7-en-3-one**  
**41**

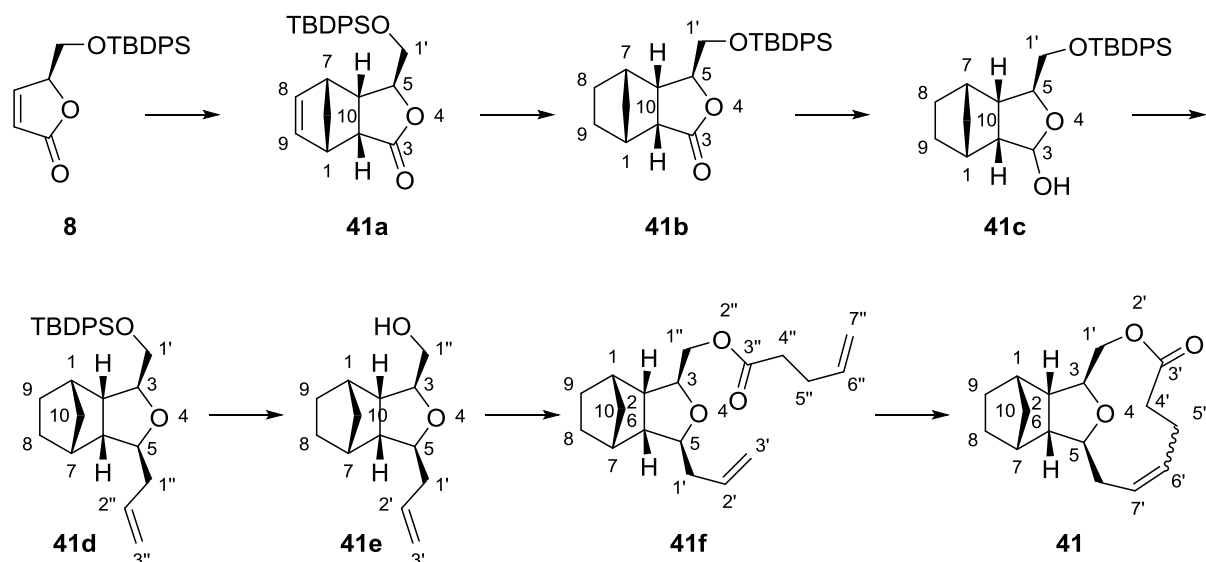

Dicyclopentadiene was cracked by heating to 170 °C and distillation of the monomer product. (*S*)-5-((*tert*-Butyldiphenylsilyloxy)methyl)furan-2-(5*H*)-one **8** (500 mg, 1.433 mmol) was weighed into a pressure tube, and cyclopentadiene (4.6 mL, 56.0 mmol) was added. The tube was sealed and heated to 110 °C for 3 d. The pressure tube was then cooled to 0 °C to reduce excess pressure, and the reaction was diluted in CH<sub>2</sub>Cl<sub>2</sub> (10 mL). Solvent and unreacted cyclopentadiene were removed *in vacuo*. Non-polar side-products were removed by loading the crude reaction mixture onto a plug of silica and washing with hexane. The products were then washed through the silica with EtOAc and concentrated *in vacuo*. The products were then separated by column chromatography (25% EtOAc:hexane) to give the *endo* product **41a** as a white crystalline solid (305 mg, 69%) and the *exo* product as a clear oil (116 mg, 16%). *Endo* Product **41a** [ $\alpha$ ]<sup>23</sup><sub>D</sub> -17.3 (*c*=2.78, CH<sub>2</sub>Cl<sub>2</sub>); IR (film) 3070, 2931, 2857, 1770 (CO), 1427 cm<sup>-1</sup>; <sup>1</sup>H NMR (500 MHz, CDCl<sub>3</sub>)  $\delta$  7.70-7.65 (4H, m, Ph), 7.50-7.38 (6H, m, Ph), 6.32 (1H, dd, *J*=3.0, 6.0, H-9), 6.23 (1H, dd, *J*=3.0, 6.5, H-8), 3.97 (1H, dd, *J*=3.0, 6.0, H-5), 3.79 (1H, dd, *J*=3.5, 11.0, Ha-1'), 3.75 (1H, dd, 3.0, 11.0, Hb-1'), 3.50-3.35 (2H, m, H-7, H-2), 3.10-3.07 (1H, m, H-6), 3.05-3.01 (1H, m, H-1), 1.66 (1H, d, *J*=8.5, Ha-10), 1.46 (1H, d, *J*=8.5, Hb-10), 1.07 (9H, s, <sup>t</sup>Bu); <sup>13</sup>C NMR (125 MHz, CDCl<sub>3</sub>)  $\delta$  177.8 (C3), 137.7 (C8), 137.3 (C9), 135.6 (Ph), 135.5 (Ph), 135.2 (Ph), 134.7 (Ph), 133.2 (<sup>i</sup>Ph), 132.6 (<sup>i</sup>Ph), 129.9 (Ph), 129.6 (Ph), 127.8 (2 x Ph), 127.8 (2 x Ph), 82.1 (C5), 65.7 (C1'), 51.7 (C10), 48.8 (C2), 45.9 (C1), 45.7 (C7), 43.1 (C6), 26.9 (<sup>t</sup>Bu), 19.2 (Si-C); LC-MS (ESI<sup>+</sup>) *m/z* 441 [M+Na<sup>+</sup>], R<sub>t</sub> 5.80 min [method B]; HRMS [M+Na<sup>+</sup>] calcd for C<sub>26</sub>H<sub>30</sub>O<sub>3</sub>SiNa 441.1856; found 441.1857. Found: C, 74.58; H, 7.23%, requires: C, 74.60; H, 7.22%. *Exo* Product [ $\alpha$ ]<sup>23</sup><sub>D</sub> -0.61 (*c*=2.14, CH<sub>2</sub>Cl<sub>2</sub>); IR (film) 3070, 3049, 2930, 2857, 1745 (CO), 1428 cm<sup>-1</sup>; <sup>1</sup>H NMR (500 MHz, CDCl<sub>3</sub>)  $\delta$  7.70-7.65 (4H, m, Ph), 7.48-7.38 (6H, m, Ph), 6.26 (1H, dd, *J*=3.0, 6.0, H-9), 6.19 (1H, dd, *J*=3.0, 6.0, H-8), 4.20 (1H, dd, *J*=3.0, 3.0, H-5), 3.84 (1H, dd, *J*=3.5, 11.0, Ha-1'), 3.75 (1H, dd, 3.5, 11.0, Hb-1'), 3.29 (1H, m, H-1), 2.88 (1H, m, H-7), 2.72 (1H, d, *J*=8.5, H-2), 2.46 (1H, dd, *J*=3, 8.5, H-6) 1.53 (2H, m, H-10), 1.05 (9H, s, <sup>t</sup>Bu); <sup>13</sup>C NMR (125 MHz, CDCl<sub>3</sub>)  $\delta$  177.4 (C1), 137.8 (C8), 137.5 (C9), 135.7 (Ph), 135.6 (Ph), 135.2 (Ph), 134.8 (Ph), 133.1 (<sup>i</sup>Ph), 132.5 (<sup>i</sup>Ph), 129.9 (Ph), 129.9 (Ph), 127.8

(2 x Ph), 127.7 (2 x Ph), 83.3 (C5), 65.7 (C1'), 49.1 (C2), 47.6 (C7), 46.6 (C1), 44.8 (C6), 43.6 (C10), 26.7 (tBu), 19.1 (Si-C); LC-MS (ESI<sup>+</sup>) *m/z* 441 [M+Na<sup>+</sup>], *R*<sub>t</sub> 5.80 min [method B]; HRMS [M+Na<sup>+</sup>] C<sub>26</sub>H<sub>30</sub>O<sub>3</sub>SiNa calcd for 441.1856; found 441.1857.

(1*S*,2*R*,5*S*,6*S*,7*R*)-5-(*tert*-Butyldiphenylsilyloxymethyl)-4-oxa-tricyclo[5.2.1.0.<sup>2,6</sup>]dec-8-en-3-one **41a** (150 mg, 0.36 mmol) was dissolved in EtOAc (3.6 mL) and Pd/C (7.5 mg, 10% w/w Pd) was added. The solution was stirred under H<sub>2</sub> (1 atm). The solution was stirred overnight at RT before being filtered through silica, washing with EtOAc. The solvent was removed *in vacuo* to yield **41b** a white crystalline solid (149 mg, 100%). mp (78-81 °C) [ $\alpha$ ]<sub>D</sub><sup>22</sup> 36.9 (c=0.89 CH<sub>2</sub>Cl<sub>2</sub>); IR (film) 3076, 3026, 2901, 2841, 1740, 1641 cm<sup>-1</sup>; <sup>1</sup>H NMR (500 MHz, CDCl<sub>3</sub>)  $\delta$  7.73-7.60 (4H, m, Ph), 7.52-7.33 (6H, m, Ph), 4.39 (1H, dd, *J*=2.5, 5.0, H-5), 3.87 (1H, dd, *J*=3.0, 11.0, Ha-1'), 3.62 (1H, dd, *J*=3.0, 11.0, Hb-1'), 3.05 (1H, dd, *J*=5.5, 11.0, H-2), 2.76-2.74 (1H, m, H-6), 2.70-2.65 (1H, m, H-1), 2.42-2.30 (1H, m, H-7), 1.66-1.44 (6H, m, H-8, H-10, H-9), 1.06 (9H, s, tBu); <sup>13</sup>C NMR (125 Hz, CDCl<sub>3</sub>)  $\delta$  178.4 (C3), 135.7 (2 x Ph), 135.6 (2 x Ph), 133.1 (iPh), 132.5 (iPh), 129.9 (2 x Ph), 127.8 (4 x Ph), 79.8 (C5), 66.2 (C1'), 48.2 (C2), 45.1 (C6), 41.6 (C10), 40.2 (C1), 39.7 (C7), 26.7 (tBu), 25.4 (C8 or C9), 19.1 (C8 or C9), 14.2 (Si-C); LC-MS (ESI<sup>+</sup>) *m/z* 443 [M+Na<sup>+</sup>], *R*<sub>t</sub> 5.65 min [method B], HRMS [M+Na<sup>+</sup>] calcd for C<sub>26</sub>H<sub>32</sub>O<sub>3</sub>SiNa 443.2018; found 443.2037.

(1*S*,2*R*,5*S*,6*S*,7*R*)-5-(*tert*-Butyldiphenylsilyloxymethyl)-4-oxa-tricyclo[5.2.1.0.<sup>2,6</sup>]decan-3-one **41b** (140 mg, 0.332 mmol) was dissolved in anhydrous CH<sub>2</sub>Cl<sub>2</sub> (1.7 mL) and cooled to -78 °C under N<sub>2</sub>. DIBAL-H (1.0 M in toluene, 0.36 mL, 0.36 mmol) was added dropwise. The reaction was stirred at -78 °C for 2 h then quenched with EtOAc (2 mL). The solution was warmed to RT and a sat. aq. solution of Rochelles salt (6mL) was added and stirred for 3 h. The aqueous layer was separated and extracted into CH<sub>2</sub>Cl<sub>2</sub> (3 x 10 mL). The organic layers were combined, dried over MgSO<sub>4</sub> and the solvent was removed *in vacuo* to yield **41c** as a clear oil (127 mg, 100%). [ $\alpha$ ]<sub>D</sub><sup>21</sup> -52.6 (c=0.15, CH<sub>2</sub>Cl<sub>2</sub>) IR (film) 3424, 3070, 2956, 2857, 1427 cm<sup>-1</sup>; <sup>1</sup>H NMR (500 MHz, CDCl<sub>3</sub>)  $\delta$  7.77-7.63 (4H, m, Ph), 7.54-7.36 (6H, m, Ph), 5.25 (1H, d, *J*=9.0, H-3), 4.42 (1H, d, *J*=10.0, OH), 4.15 (1H, dd, *J*=3.0, 3.0, H-5), 3.87 (1H, dd, *J*=3.0, 11.0, H-1'), 3.56 (1H, dd, *J*=3.0, 11.0, H-1'), 2.61-2.51 (2H, m, H-2, H-6), 2.42 (1H, m, H-7 or H-1), 2.16 (1H, m, H-1 or H-7), 1.55-1.41 (4H, m, CH<sub>2</sub>), 1.38-1.30 (2H, m, CH<sub>2</sub>), 1.10 (9H, s, tBu); <sup>13</sup>C NMR (125 MHz, CDCl<sub>3</sub>)  $\delta$  135.8 (2 x Ph), 135.6 (2 x Ph), 132.3 (iPh), 132.3 (iPh), 129.9 (Ph), 128.2 (Ph), 127.8 (4 x Ph), 100.2 (C3), 81.3 (C5), 68.0 (C1'), 56.0 (C2 or C6), 46.5 (C2 or C6), 42.0 (CH<sub>2</sub>), 40.5 (C7), 39.4 (C1), 26.9 (tBu), 23.2 (CH<sub>2</sub>), 23.0 (CH<sub>2</sub>), 19.2 (Si-C); LC-MS (ESI<sup>+</sup>) *m/z* 441 [M+Na<sup>+</sup>], *R*<sub>t</sub> 4.59 min [method B]; HRMS [M+K<sup>+</sup>] calcd for C<sub>26</sub>H<sub>34</sub>O<sub>3</sub>SiK 461.1909; found 461.1912.

(1*S*,2*R*,5*S*,6*S*,7*R*)-5-(*tert*-Butyldiphenylsilyloxymethyl)-4-oxatricyclo[5.2.1.0.<sup>2,6</sup>]decan-3-ol **41c** (101 mg, 0.239 mmol) was dissolved in CH<sub>2</sub>Cl<sub>2</sub> (1 mL) and cooled to -78 °C. BF<sub>3</sub>·OEt<sub>2</sub> (90  $\mu$ L, 0.718 mmol) was added and the solution stirred for 5 min. Allyltrimethylsilane (114  $\mu$ L, 0.719 mmol) was added and the reaction then warmed to RT. The reaction was stirred for

18 h before quenching with H<sub>2</sub>O (7 mL), and extracted with CH<sub>2</sub>Cl<sub>2</sub> (3 x 7 mL). The combined organic layers were washed with brine (10 mL) and dried with MgSO<sub>4</sub>. The solvent was removed *in vacuo* to yield **41d** a clear oil (97 mg, 92%). [ $\alpha$ ]<sup>24.9</sup><sub>D</sub> 4.1 (c=0.75, CH<sub>2</sub>Cl<sub>2</sub>); IR (film) 3071, 3048, 2956, 1427 cm<sup>-1</sup>; <sup>1</sup>H NMR (500 MHz, CDCl<sub>3</sub>)  $\delta$  7.70-7.75 (4H, m, Ph), 7.41-7.48 (6H, m, Ph), 5.77-5.82 (1H, m, H-2''), 5.03-5.06 (2H, m, H-3''), 3.93 (1H, ddd, *J*=5.0, 6.0, 6.0, H-3), 3.85 (1H, ddd, *J*=5.0, 5.0, 7.0, H-5) 3.69 (1H, dd, *J*=5.5, 10.0, Ha-1'), 3.53 (1H, dd, *J*=6.5, 10.0, Hb-1'), 2.55-2.52 (1H, m, H-2), 2.35-2.29 (2H, m, H-6, Ha-1'') 2.20 (1H, br s, H-7), 2.15 (1H, br s, H-1), 2.17-2.11 (1H, m, Hb-1''), 1.68-1.60 (4H, m, H-8, H-9), 1.41 (2H, d, *J*=8.0, H-10), 1.05 (9H, s, tBu); <sup>13</sup>C NMR (125 MHz, CDCl<sub>3</sub>)  $\delta$  135.7 (2 x Ph), 135.7 (2 x Ph), 135.4 (C2''), 133.8 (iPh), 133.7 (iPh), 129.6 (Ph), 129.5 (Ph), 127.6 (4 x Ph), 116.5 (C3''), 79.7 (C3), 78.9 (C5), 67.4 (C1'), 52.6 (C6), 50.4 (C2), 44.0 (C8), 42.0 (C2''), 39.9 (C7), 39.9 (C1), 26.9 (tBu), 22.9 (C9), 19.2 (Si-C).

((1*R*,2*S*,3*S*,5*S*,6*R*,7*S*)-5-Allyl-4-oxatricyclo[5.2.1.0<sup>2,6</sup>]decane-3-ylmethoxy-*tert*-butyldiphenylsilane **41d** (90 mg, 0.202 mmol) was dissolved in THF (1.1 mL). The solution was cooled to 0 °C under N<sub>2</sub> and TBAF (0.60 mL, 0.60 mmol, 1.0 M in THF) was added by syringe. The reaction was stirred for 2 h at 0 °C before diluting with Et<sub>2</sub>O (10 mL). The reaction mixture was washed with H<sub>2</sub>O (3 x 10 mL) and extracted into Et<sub>2</sub>O (3 x 10 mL). The combined organic layers were dried over MgSO<sub>4</sub> and the solvent was removed *in vacuo* to give the crude product. This was purified by column chromatography on silica gel (15% EtOAc:hexane) to yield **41e** as a clear oil (39 mg, 92%). [ $\alpha$ ]<sup>22</sup><sub>D</sub> 15.3 (c=0.53 CH<sub>2</sub>Cl<sub>2</sub>); IR (film) 3416, 2950, 2879, 1641, 1455, 1048 cm<sup>-1</sup>; <sup>1</sup>H NMR (500 MHz, CDCl<sub>3</sub>)  $\delta$  5.76 (1H, tdd, *J*=7.0, 10.5, 17.0, Ha-3'), 5.11-5.06 (2H, m, H-3'), 4.04-3.99 (2H, m, H-3, H-5), 3.52 (1H, dd, *J*=4.0, 11.5, Ha-1''), 3.42 (1H, dd, *J*=8.0, 11.5, Hb-1''), 2.41-2.34 (3H, m, Ha-1', H-7 or H-1, H-2 or H-6), 2.27-2.23 (3H, m, Hb-1', H-1 or H-7, H-2 or H-6), 2.07 (1H, m, OH), 1.61-1.69 (4H, m, H-8, H-9), 1.46-1.49 (2H, m, H-10); <sup>13</sup>C NMR (125 MHz, CDCl<sub>3</sub>)  $\delta$  135.2 (C2'), 116.9 (C3'), 79.8 (C3), 78.8 (C5), 66.3 (C1''), 52.7 (C6 or C2), 49.0 (C6 or C2), 43.8 (C10), 42.4 (C1'), 39.9 (C1), 39.5 (C7), 22.9 (C8 or C9), 22.9 (C8 or C9); LC-MS (ESI<sup>+</sup>) *m/z* 231 [M+Na<sup>+</sup>], *R*<sub>t</sub> 2.20 min [method D]; HRMS [M+H<sup>+</sup>] calcd for C<sub>13</sub>H<sub>21</sub>O<sub>2</sub> 209.1536; found 209.1539.

((1*R*,2*S*,3*S*,5*S*,6*R*,7*S*)-5-Allyl-4-oxatricyclo[5.2.1.0<sup>2,6</sup>]dec-3-yl)-methanol **41e** (50 mg, 0.243 mmol) was dissolved in pyridine (1.2 mL). Pent-4-enoyl chloride (83  $\mu$ L, 0.762 mmol) was added and the reaction mixture was stirred at RT for 18 h. The solvents were removed *in vacuo* and the remaining residue was dissolved in CH<sub>2</sub>Cl<sub>2</sub> (10 mL) and washed with H<sub>2</sub>O (10 mL) and brine (10 mL). The aqueous layers were combined and extracted with CH<sub>2</sub>Cl<sub>2</sub> (10 mL x 2). The combined organic layers were dried with MgSO<sub>4</sub> and the solvents removed *in vacuo*. The crude reaction mixture was purified by column chromatography on silica gel (25% EtOAc:hexane) to yield **41f** as a clear oil (38 mg, 55%). [ $\alpha$ ]<sup>25</sup><sub>D</sub> +15.8 (c=1.0 CHCl<sub>3</sub>); IR (film) 2952, 1737 cm<sup>-1</sup>; <sup>1</sup>H NMR (500 MHz, CDCl<sub>3</sub>)  $\delta$  5.89-5.73 (2H, m, H-2', H-6''), 5.11-4.94 (4H, m, H-3', H-7''), 4.11-4.02 (3H, m, H-1'', H-3), 3.95 (1H, ddd, *J*=4.0, 7.0, 7.0, H-5), 2.49-2.32 (7H, m, H-5'', H-4'', H-6, H-2, HA-1'), 2.22-2.16 (3H, m, H-1, H-7, HB-1'), 1.65-1.56 (4H,

m, H-10, H-8 or H-9), 1.45-1.39 (2H, m, H-9 or H-8);  $^{13}\text{C}$  NMR (125 MHz,  $\text{CDCl}_3$ )  $\delta$  173.0 ( $\text{C}3''$ ), 136.7 ( $\text{C}2'$  or  $\text{C}6''$ ), 134.9 ( $\text{C}2'$  or  $\text{C}6''$ ), 116.8 ( $\text{C}3'$  or  $\text{C}7''$ ), 115.5 ( $\text{C}3'$  or  $\text{C}7''$ ), 79.2 ( $\text{C}5$ ), 76.8 ( $\text{C}3$ ), 67.6 ( $\text{C}1''$ ), 52.5 ( $\text{C}6$  or  $\text{C}2$ ), 50.0 ( $\text{C}6$  or  $\text{C}2$ ), 43.9 ( $\text{C}10$ ), 41.9 ( $\text{C}1'$ ), 39.8 ( $\text{C}1$  or  $\text{C}7$ ), 39.5 ( $\text{C}1$  or  $\text{C}7$ ), 33.5 ( $\text{C}5''$  or  $\text{C}4''$ ), 28.8 ( $\text{C}5''$  or  $\text{C}4''$ ), 22.8 ( $\text{C}9$  or  $\text{C}8$ ), 22.8 ( $\text{C}9$  or  $\text{C}8$ ); LC-MS ( $\text{ESI}^+$ )  $m/z$  313 [ $\text{M}+\text{Na}^+$ ],  $R_t$  2.50 min [method D]; HRMS [ $\text{M}+\text{H}^+$ ] calcd for  $\text{C}_{18}\text{H}_{27}\text{O}_3$  291.1955 found 291.1955.

(1*S*,2*S*,3*S*,5*S*,6*R*,7*R*)-5-allyl-4-oxatricyclo[5.2.1.0<sup>2,6</sup>]dec-3-ylmethyl pent-5-enoate **41f** (20 mg, 0.069 mmol) was dissolved in  $\text{CH}_2\text{Cl}_2$  (137 mL, 0.0005 M). Argon was bubbled through the solution for 5 min. Grubbs II (6 mg, 0.008 mmol, 10 mol%) was added under argon and the reaction mixture was stirred for 16 h. DMSO (10  $\mu\text{L}$ ) was added and the solution was stirred overnight. The solvents were removed *in vacuo* and the resultant mixture purified by column chromatography on silica gel (15% EtOAc:hexane) to yield **41** as a mixture of E and Z (clear oil) (4 mg, 22%).  $[\alpha]^{24}_{\text{D}} -6.8$  ( $c=0.5$   $\text{CHCl}_3$ ); IR (film) 2951, 1737 ( $\text{C}=\text{O}$ ), 1171, 1106  $\text{cm}^{-1}$ ;  $^1\text{H}$  NMR (500 MHz,  $\text{CDCl}_3$ )  $\delta$  5.59-5.42 (2H, m, H-7', H-6'), 4.18-3.90 (4H, m, H-1', H-3, H-5), 2.40-2.28 (6H, m,  $\text{CH}_2$ , CH), 2.26-2.14 (4H, m, CH,  $\text{CH}_2$ ), 1.70-1.52 (4H, m,  $\text{CH}_2$ ), 1.47-1.37 (2H, m,  $\text{CH}_2$ );  $^{13}\text{C}$  NMR (125 MHz,  $\text{CDCl}_3$ )  $\delta$  173.2, 173.0 ( $\text{C}3'$ ), 130.2, 129.5, 129.0, 128.0 (2C,  $\text{C}7'$ ,  $\text{C}6'$ ), 79.8, 79.6, 77.6, 77.5 (2C,  $\text{C}3$ ,  $\text{C}5$ ), 67.4, 67.5 ( $\text{C}1'$ ), 52.4, 52.4 (CH), 49.0, 49.0 (CH), 43.6, 43.5 ( $\text{CH}_2$ ), 41.3 ( $\text{CH}_2$ ), 40.6 ( $\text{CH}_2$ ), 40.0, 39.8 (CH), 39.6 (CH), 34.4, 34.3 ( $\text{CH}_2$ ), 28.0, 27.9 ( $\text{CH}_2$ ), 22.9 ( $\text{CH}_2$ ), 22.8 ( $\text{CH}_2$ ); LC-MS ( $\text{ESI}^+$ )  $m/z$  285 [ $\text{M}+\text{Na}^+$ ],  $R_t$  2.32 min [method D]; HRMS [ $\text{M}+\text{H}^+$ ] calcd for  $\text{C}_{16}\text{H}_{23}\text{O}_3$  263.1642 found 263.1643.

**(E)-(1*S*,11*S*,12*R*,17*S*)-3,18-Dioxatetracyclo[9.6.1.1<sup>13,16</sup>.0<sup>12,17</sup>]nonadec-8-en-4-one **42****

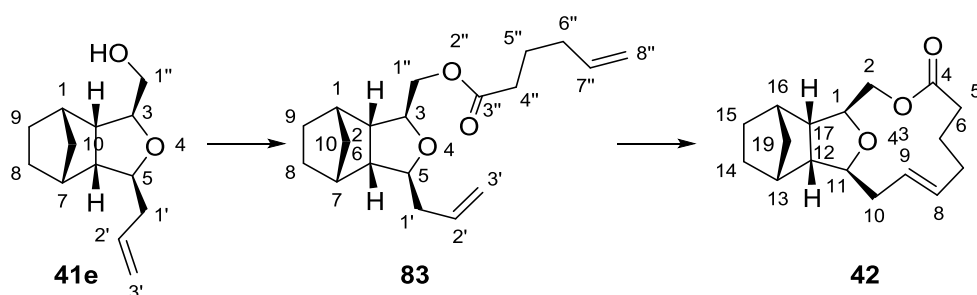

((1*R*,2*S*,3*S*,5*S*,6*R*,7*S*)-5-Allyl-4-oxatricyclo[5.2.1.0<sup>2,6</sup>]dec-3-yl)methanol **41e** (50 mg, 0.243 mmol) was dissolved in pyridine 1.2 mL. Hex-5-enoyl chloride (100 mg, 0.762 mmol) was added and the reaction mixture was stirred at RT for 18 h. The solvents were removed *in vacuo* and the remaining residue was dissolved in  $\text{CH}_2\text{Cl}_2$  (10 mL) and washed with  $\text{H}_2\text{O}$  (10 mL) and brine (10 mL). The aqueous layers were combined and extracted with  $\text{CH}_2\text{Cl}_2$  (10 mL x 2). The combined organic layers were dried with  $\text{MgSO}_4$  and the solvents removed *in vacuo*. The crude reaction mixture was purified by column chromatography on silica gel (15% EtOAc:hexane) to yield **83** as a clear oil (73 mg, 100%).  $[\alpha]^{25}_{\text{D}} -5.5$  ( $c=1.0$   $\text{CHCl}_3$ ); IR (film) 2952, 1737  $\text{cm}^{-1}$ ;  $^1\text{H}$  NMR (500 MHz,  $\text{CDCl}_3$ )  $\delta$  5.79 (1H, dddd,  $J=7.0, 7.0, 10.5, 17.0$ , H-2'

or H-7''), 5.76 (1H, dddd,  $J=7.0, 7.0, 10.0, 17.0$ , H-2' or H-7''), 5.09-4.97 (4H, m, H-3', H-8''), 4.09-4.00 (3H, m, H-1'', H-3), 3.90 (1H, ddd,  $J=4.0, 7.0, 7.0$ , H-5), 2.45-2.32 (5H, m, HA-1', H-4'', H-2, H-6), 2.21-2.16 (3H, m, H-1, H-7, HB-1'), 2.16-2.08 (2H, m, H-6''), 1.75 (2H, tt,  $J=7.5, 7.5$ , H-5''), 1.63-1.56 (4H, m, HA-8, HA-9, H-10), 1.13-1.43 (2H, m, HB-9, HB-8);  $^{13}\text{C}$  NMR (125 MHz,  $\text{CDCl}_3$ )  $\delta$  173.5 (C3''), 137.7 (C7''), 134.9 (C2'), 116.8 (C8'' or C3'), 115.3 (C8'' or C3'), 79.2 (C5), 76.7 (C3), 67.5 (C1''), 52.5 (C6 or C2), 50.1 (C6 or C2), 43.9 (C10), 41.9 (C1'), 39.8 (C1 or C7), 39.5 (C1 or C7), 33.4 (C4''), 33.0 (C6''), 24.0 (C5''), 22.8 (C9 or C8), 22.8 (C9 or C9); LC-MS (ESI<sup>+</sup>)  $m/z$  327 [ $\text{M}+\text{Na}^+$ ],  $R_t$  2.55 min [method D]; HRMS [ $\text{M}+\text{H}^+$ ] calcd for  $\text{C}_{19}\text{H}_{30}\text{O}_3$  305.2111 found 305.2115; Found: C, 74.91%; H, 9.26%;  $\text{C}_{17}\text{H}_{28}\text{O}_3$  requires: C, 74.96%; H, 9.27%.

(1*S*,2*S*,3*S*,5*S*,6*R*,7*R*)-5-Allyl-4-oxatricyclo[5.2.1.0<sup>2,6</sup>]dec-3-ylmethyl hex-5-enoate **83** (24 mg, 0.078 mmol) was dissolved in  $\text{CH}_2\text{Cl}_2$  (156 mL, 0.0005 M). Argon was bubbled through the solution for 5 min. Grubbs II (7 mg, 0.008 mmol, 10 mol%) was added under argon and the reaction mixture was stirred for 5 d. DMSO (10  $\mu\text{L}$ ) was added and the solution was stirred overnight. The solvents were removed *in vacuo* and the resultant mixture purified by column chromatography on silica gel (15% EtOAc:hexane) to yield **42** as a white crystalline solid (11 mg, 51%). mp (94-96 °C);  $[\alpha]_D^{24}$  -10.4 ( $c=1.0$   $\text{CHCl}_3$ ); IR (film) 2948, 1729, 1440  $\text{cm}^{-1}$ ;  $^1\text{H}$  NMR (500 MHz,  $\text{CDCl}_3$ )  $\delta$  5.54 (1H, ddd,  $J=7.0, 7.0, 14.0$ , H-9 or H-8), 5.28 (1H, ddd,  $J=7.0, 7.0, 14.0$ , H-9 or H-8), 4.33 (1H, dd,  $J=3.0, 12.0$ , Ha-2), 4.14-4.09 (2H, m, H-1, H-11), 3.69 (1H, dd,  $J=7.5, 12.0$ , Hb-2), 2.56-2.49 (1H, m, H-12 or H-17), 2.77-2.32 (3H, m, H-16 or H-17,  $\text{CH}_2$ ,  $\text{CH}_2$ ), 2.29-1.98 (7H, m, H-12 or H-17, H-16 or H-13,  $\text{CH}_2$ ,  $\text{CH}_2$ ,  $\text{CH}_2$ ), 1.96-1.81 (2H, m,  $\text{CH}_2$ ), 1.68-1.53 (4H, m, Ha-14, Ha-15,  $\text{CH}_2$ ), 1.46-1.38 (2H, m, Hb-14, Hb-15);  $^{13}\text{C}$  NMR (125 MHz,  $\text{CDCl}_3$ )  $\delta$  175.3 (C4), 132.0 (C8 or C9), 127.4 (C8 or C9), 77.6 (C1 or C11), 76.1 (C1 or C11), 65.8 (C2), 51.5 (C12 or C17), 48.8 (C16 or C13), 43.7 ( $\text{CH}_2$ ), 39.8 (CH), 39.5 (CH), 39.5 (CH), 33.9 ( $\text{CH}_2$ ), 33.8 ( $\text{CH}_2$ ), 24.0 ( $\text{CH}_2$ ), 22.9 (C14 or C15), 22.7 (C14 or C15); LC-MS (ESI<sup>+</sup>)  $m/z$  299 [ $\text{M}+\text{Na}^+$ ],  $R_t$  2.43 min [method D]; HRMS [ $\text{M}+\text{H}^+$ ] calcd for  $\text{C}_{17}\text{H}_{26}\text{O}_3$  277.1798 found 277.1799.

## 2-[(1*R*,3*S*,3*aS*,7*aR*)-3-[(*tert*-butyldiphenylsilyloxy)methyl]-1,3,3*a*,4,7,7*a*-hexahydro-2-benzofuran-1-yl]-2-methylpropanal **44**

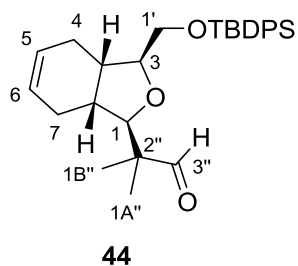

(3*S*,3*aS*,7*aR*)-3-((*tert*-Butyldiphenylsilyloxy)methyl)-1,3,3*a*,4,7,7*a*-hexahydroisobenzofuran-1-ol **11** (100 mg, 0.245 mmol) was dissolved in  $\text{CH}_2\text{Cl}_2$  (2.8 mL) and cooled to -78 °C.  $\text{BF}_3 \cdot \text{OEt}_2$  (94  $\mu\text{L}$ , 0.735 mmol) was added and the solution was stirred for 5 min. Trimethyl(2-methylprop-1-enyloxy)silane (49  $\mu\text{L}$ , 0.269 mmol) was then added and the reaction was warmed to RT and stirred for 3 h. The reaction was diluted with  $\text{CH}_2\text{Cl}_2$  (20 mL), and washed with  $\text{H}_2\text{O}$  (2 x 20 mL), followed by brine (20 mL). The organic layer was dried with  $\text{MgSO}_4$ . The solvents were removed *in vacuo* and the resultant crude residue was purified by column



chromatography on silica gel (15% EtOAc:hexane) to yield the product as a clear oil (110 mg, 97%).  $[\alpha]^{21}_{\text{D}} +1.1$  ( $c=5.0$   $\text{CHCl}_3$ ); IR (film) 3018, 1708, 1218  $\text{cm}^{-1}$ ;  $^1\text{H}$  NMR (500 MHz,  $\text{CDCl}_3$ )  $\delta$  9.66 (1H, s, H-3''), 7.73-7.68 (4H, m, Ph), 7.46-7.37 (6H, m, Ph), 5.81-5.78 (2H, m, H-5, H-6), 3.81-3.75 (2H, m, Ha-1', H-1 or H-3), 3.73-3.68 (2H, m, Hb-1', H-1 or H-3), 2.29-2.17 (4H, m, H-3a, H-7a, Ha-4, Ha-7), 1.97-1.86 (2H, m, Hb-4, Hb-7), 1.11 (3H, s, Me), 1.08 (3H, s, Me), 1.07 (9H, s, tBu);  $^{13}\text{C}$  NMR (125 MHz,  $\text{CDCl}_3$ )  $\delta$  206.1 (C3''), 135.7 (2 x Ph), 135.6 (2 x Ph), 133.6 (iPh), 133.4 (iPh), 129.6 (Ph), 129.6 (Ph), 127.7 (4 x Ph), 127.0 (C5 or C6), 126.3 (C5 or C6), 89.1 (C1), 83.8 (C3), 64.7 (C1'), 49.6 (C2''), 37.8 (C3a or C7a), 37.2 (C3a or C7a), 27.4 (C7), 26.8 (tBu), 24.0 (C4), 19.2 (C-Si), 19.2 (Me), 17.6 (Me); LC-MS (ESI<sup>+</sup>)  $m/z$  485 [ $\text{M}+\text{Na}^+$ ],  $R_t$  2.60 min [method E]; Found: C, 75.35; H, 8.15%;  $\text{C}_{29}\text{H}_{38}\text{O}_3\text{Si}$  requires: C, 75.28; H, 8.28%.

**2-((1S,3S,3aS,7aR)-3-((tert-butylidiphenylsilyloxy)methyl)-1,3,3a,4,7,7a-hexahydroisobenzofuran-1-yl)-1-phenylethanone 45**

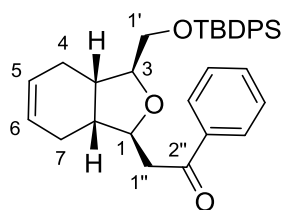

**45**

(3S,3aS,7aR)-3-((tert-Butylidiphenylsilyloxy)methyl)-1,3,3a,4,7,7a-hexahydroisobenzofuran-1-ol **11** (100 mg, 0.245 mmol) was dissolved in  $\text{CH}_2\text{Cl}_2$  (2.8 mL) and cooled to  $-20$  °C.  $\text{BF}_3\cdot\text{OEt}_2$  (63  $\mu\text{L}$ , 0.490 mmol) was added and the solution was stirred for 5 min. Trimethyl(1-phenylvinyl)silane (100  $\mu\text{L}$ , 0.490 mmol) was then added and the reaction was warmed to RT and stirred for a further 16 h. The reaction was diluted with  $\text{CH}_2\text{Cl}_2$  (20 mL), and washed with  $\text{H}_2\text{O}$  (2 x 20 mL), followed by brine (20 mL). The organic layer was dried with  $\text{MgSO}_4$ . The solvents were removed *in vacuo* and the resultant crude residue was a green oil. The product was isolated by column chromatography on silica gel (10% EtOAc:hexane) to yield **45** as a clear oil (95 mg, 78%).  $[\alpha]^{21}_{\text{D}} -1.66$  ( $c=1.0$   $\text{CHCl}_3$ ); IR (film) 3070, 2930, 2857, 1684 (CO)  $\text{cm}^{-1}$ ;  $^1\text{H}$  NMR (500 MHz,  $\text{CDCl}_3$ )  $\delta$  7.94-7.90 (2H, m, Ph), 7.75-7.67 (5H, m, Ph), 7.44-7.35 (8H, m, Ph), 5.77-5.68 (2H, m, H-5, H-6), 4.35 (1H, dd,  $J=6.0, 12.0$ , H-1), 3.82-3.77 (1H, m, H-3), 3.76 (1H, dd,  $J=4.5, 11.0$ , Ha-1''), 3.68 (1H, dd,  $J=4.0, 11.0$ , Hb-1''), 3.30 (1H, dd,  $J=6.5, 16.5$ , Ha-1'), 3.07 (1H, dd,  $J=6.0, 16.5$ , Hb-1'), 2.54-2.48 (1H, m, H-3a), 2.47-2.36 (2H, m, Ha-4, Ha-7), 2.26-2.18 (1H, m, H-7a), 2.03-1.93 (2H, m, Hb-4, Hb-7), 1.09 (9H, s, tBu);  $^{13}\text{C}$  NMR (125 MHz,  $\text{CDCl}_3$ )  $\delta$  198.7 (C2''), 137.2 (iPh), 135.6 (2 x Ph), 135.6 (2 x Ph), 134.8 (Ph), 133.6 (Ph), 133.4 (iPh), 133.0 (iPh), 129.7 (Ph), 129.6 (Ph), 129.6 (Ph), 128.5 (Ph), 128.2 (Ph), 127.7 (Ph), 127.7 (2 x Ph), 127.7 (Ph), 125.4 (C5 or C6), 125.2 (C5 or C6), 84.1 (C3), 80.2 (C1), 64.9 (C1'), 44.4 (C1''), 40.1 (C7a), 35.5 (C3a), 26.9 (tBu), 24.8 (C4 or C7), 24.5 (C4 or C7), 19.3 (Si-C); LC-MS (ESI<sup>+</sup>)  $m/z$  533 [ $\text{M}+\text{Na}^+$ ],  $R_t$  2.52 min [method D]; HRMS [ $\text{M}+\text{Na}^+$ ] calcd for  $\text{C}_{33}\text{H}_{37}\text{O}_3\text{SiNa}$  533.2482 found 533.2492; Found: C, 77.51; H, 7.40%;  $\text{C}_{33}\text{H}_{38}\text{O}_3\text{Si}$  requires: C, 77.60; H, 7.50%.

**3-[(1R,3S,3aS,7aR)-3-(Hydroxymethyl)-octahydro-2-benzofuran-1-yl]-3-methylbutan-2-one**  
**46**

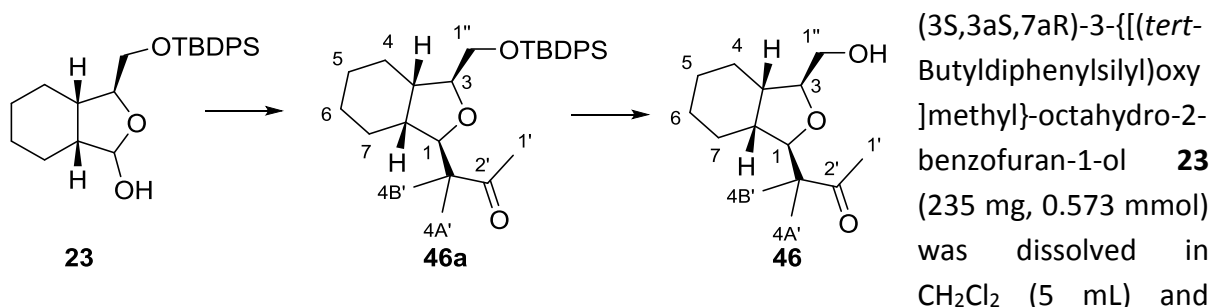

trimethyl(3-methylbut-2-en-2-yloxy)silane (100 mg, 0.630 mmol) was added. The solution was cooled to -78 °C and TMSOTf (286 μL, 0.1 M in CH<sub>2</sub>Cl<sub>2</sub>, 0.029 mmol) was added and the reaction was warmed to -18 °C for 18 h. The reaction was quenched with sat. aqueous NaHCO<sub>3</sub> (20 mL) and extracted in CH<sub>2</sub>Cl<sub>2</sub> (3 × 30 mL). The combined organic layers were dried over MgSO<sub>4</sub> and the solvent removed *in vacuo*. The crude residue was purified by column chromatography on silica gel (15% EtOAc:hexane) to yield **46a** as a clear oil (101 mg, 36%). [α]<sup>24.3</sup><sub>D</sub> -22.7 (c=0.75 CHCl<sub>3</sub>); IR (film) 2929, 2856, 1774 cm<sup>-1</sup>; <sup>1</sup>H NMR (500 MHz, CDCl<sub>3</sub>) δ 7.74-7.65 (4H, m, Ph), 7.46-7.35 (6H, m, Ph), 3.91 (1H, ddd, J=4.0, 4.0, 9.0, H-3), 3.87 (1H, d, J=3.5, H-1), 3.76 (1H, dd, J=4.0, 11.0, Ha-1''), 3.67 (1H, dd, J=5.0, 11.0, Hb-1'') 2.17 (3H, s, H-1'), 2.05-1.94 (2H, m, H-3a, H-7a), 1.73-1.54 (4H, m, CH<sub>2</sub>), 1.49-1.23 (4H, m, CH<sub>2</sub>), 1.14 (3H, s, Me), 1.09 (3H, s, Me), 1.08 (9H, s, tBu); <sup>13</sup>C NMR (125 MHz, CDCl<sub>3</sub>) δ 213.2 (C2'), 135.7 (2 x Ph), 135.6 (2 x Ph), 133.7 (iPh), 133.5 (iPh), 129.6 (Ph), 129.5 (Ph), 127.8 (2 x Ph), 127.6 (2 x Ph), 88.8 (C1), 80.7 (C3), 65.2 (C1''), 51.5 (C3'), 39.3 (C7a or C3a), 38.8 (C7a or C3a), 29.6 (CH<sub>2</sub>), 26.7 (tBu), 26.7 (C1'), 24.3 (CH<sub>2</sub>), 24.2 (CH<sub>2</sub>), 22.2 (CH<sub>2</sub>), 20.8 (C4A' or C4B'), 20.3 (C4A' or C4B'), 19.2 (C-Si); HRMS [M+Na<sup>+</sup>] calcd for C<sub>30</sub>H<sub>42</sub>O<sub>3</sub>SiNa 501.2795 found 501.2799.

3-[(1R,3S,3aS,7aR)-3-[[*tert*-Butyldiphenylsilyloxy]methyl]-octahydro-2-benzofuran-1-yl]-3-methylbutan-2-one **46a** (81 mg, 0.169 mmol), was dissolved in THF (2 mL). TBAF (1.0 M in THF, 0.51 mL, 0.51 mmol) and AcOH (0.31 mL, 0.508 mmol) were added and the reaction stirred at RT for 16 h. The solution was diluted with Et<sub>2</sub>O (20 mL) and washed with H<sub>2</sub>O (2 x 20 mL), brine (20 mL) and the organic layer was dried with MgSO<sub>4</sub>. The crude residue was purified by column chromatography on silica gel to yield **46** as a clear oil (32 mg, 78%). [α]<sup>24.6</sup><sub>D</sub> +12.4 (c=1.0 CHCl<sub>3</sub>); IR (film) 3428, 2926, 2857, 1698, 1450 cm<sup>-1</sup>; <sup>1</sup>H NMR (500 MHz, CDCl<sub>3</sub>) δ 3.89 (1H, ddd, J=3.0, 5.5, 13.0, H-3), 3.87 (1H, d, J=3.5, H-1), 3.74 (1H, ddd, J=3.0, 6.5, 12.0, Ha-1'), 3.51 (1H, ddd, J=3.5, 3.5, 12.0, Hb-1''), 2.18 (3H, s, H-1'), 2.06-1.99 (2H, m, OH, H-7a), 1.96-1.90 (1H, m, H-3a), 1.74-1.52 (4H, m, CH<sub>2</sub>), 1.43-1.21 (4H, m, CH<sub>2</sub>), 1.11 (3H, s, Me), 1.09 (3H, s, Me); <sup>13</sup>C NMR (125 MHz, CDCl<sub>3</sub>) δ 212.8 (C2''), 89.3 (C1), 80.6 (C3), 63.8 (C1'), 51.5 (C3''), 39.6 (C7a), 38.0 (C3a), 29.8 (CH<sub>2</sub>), 26.4 (C1''), 24.2 (CH<sub>2</sub>), 23.9 (CH<sub>2</sub>), 21.9 (CH<sub>2</sub>), 21.3 (Me), 19.8 (Me); LC-MS (ESI<sup>+</sup>) *m/z* 263 [M+Na<sup>+</sup>], R<sub>t</sub> 1.42 min [method D]; HRMS [M+Na<sup>+</sup>] calcd for C<sub>14</sub>H<sub>24</sub>O<sub>3</sub>Na 263.1617 found 263.1617.

**1-[(1S,3S,3aS,7aR)-3-(hydroxymethyl)-octahydro-2-benzofuran-1-yl]-3,3-dimethylbutan-2-one **47****

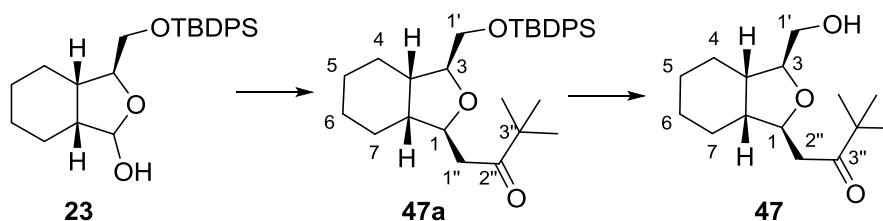

(3S,3aS,7aR)-3-((*tert*-Butyldiphenylsilyloxy)methyl)octahydroisobenzofuran-1-ol **23** (615 mg, 1.50 mmol) was dissolved in CH<sub>2</sub>Cl<sub>2</sub> (15 mL) and cooled to -20 °C. BF<sub>3</sub>·OEt<sub>2</sub> (578 μL, 4.50 mmol) was added and the solution was stirred for 5 min. (3,3-Dimethylbut-1-en-2-oxo)trimethylsilane (797 μL, 4.50 mmol) was then added and the reaction was warmed to RT and stirred for 16 h. The reaction was diluted with CH<sub>2</sub>Cl<sub>2</sub> (20 mL), and washed with H<sub>2</sub>O (2 x 20 mL), followed by brine (20 mL). The organic layer was dried with MgSO<sub>4</sub>. The product was isolated by column chromatography on silica gel (15% EtOAc:hexane) to yield **47a** as a clear oil (483 mg, 65%). [ $\alpha$ ]<sup>21</sup><sub>D</sub> +9.0 (c=1.0 CHCl<sub>3</sub>); IR (film) 2931, 2858, 1702, 1473 cm<sup>-1</sup>; <sup>1</sup>H NMR (500 MHz, CDCl<sub>3</sub>)  $\delta$  7.71-7.66 (4H, m, Ph), 7.43-4.39 (6H, m, Ph), 4.30-4.25 (1H, m, H-1), 3.89-3.85 (1H, m, H-3), 3.68 (1H, dd, J=5.0, 11.0, Ha-1'), 3.61 (1H, dd, J=4.0, 11.0, Hb-1'), 2.78 (1H, dd, J=6.0, 17.0, Ha-1''), 2.53 (1H, dd, J=6.0, 17.0, Hb-1''), 2.27-2.22 (1H, m, H-7a), 1.93-1.87 (1H, m, 3a), 1.65-1.26 (8H, m, 4 x CH<sub>2</sub>), 1.10 (9H, s, tBu), 1.08 (9H, s, tBu); <sup>13</sup>C NMR (125 MHz, CDCl<sub>3</sub>)  $\delta$  214.6 (C-3''), 135.6 (2 x Ph), 134.8 (2 x Ph), 133.7 (iPh), 133.5 (iPh), 129.6 (Ph), 129.6 (Ph), 127.7 (2 x Ph), 127.6 (2 x Ph), 82.3 (C3), 78.4 (C1), 65.0 (C1'), 44.1 (C3''), 43.1 (C3a), 42.7 (C1''), 38.3 (C7a), 26.1 (tBu), 25.9 (tBu), 25.9 (CH<sub>2</sub>), 23.3 (CH<sub>2</sub>), 23.1 (CH<sub>2</sub>), 22.6 (CH<sub>2</sub>), 19.3 (Si-C), HRMS [M+Na<sup>+</sup>] calcd for C<sub>31</sub>H<sub>44</sub>O<sub>3</sub>SiNa 515.2957 found 515.2938.

1-[(1S,3S)-3-((*tert*butyldiphenylsilyl)oxy)methyl]-octahydro-2-benzofuran-1-yl]-3,3-dimethylbutan-2-one **47a** (467mg, 0.949 mmol) was dissolved in THF (10 mL). The solution was cooled to 0 °C under N<sub>2</sub>, then TBAF (2.8 mL, 1.0 M in THF, 2.8 mmol) and AcOH (1.7 mL, 2.8 mmol) was added by syringe. The reaction was stirred for 16 h at RT before diluting with Et<sub>2</sub>O (30 mL). The reaction mixture was washed with H<sub>2</sub>O (30 mL) and extracted into Et<sub>2</sub>O (2 x 30 mL). The combined organic layers were dried with MgSO<sub>4</sub> and solvents were removed *in vacuo* to yield the crude product as a clear oil. This was purified by column chromatography on silica gel (10% EtOAc:hexane) to yield **47** as a clear oil (161 mg, 67%). [ $\alpha$ ]<sup>22</sup><sub>D</sub> + 17.6 (c=2.60 CH<sub>2</sub>Cl<sub>2</sub>); IR (film) 3414, 3075, 3026, 2975, 2841, 1700, 1478 cm<sup>-1</sup>; <sup>1</sup>H NMR (500 MHz, CDCl<sub>3</sub>)  $\delta$  4.26-4.21 (1H, m, H-1), 3.93-3.89 (1H, m, H-3), 3.76-3.71 (1H, m, Ha-1'), 3.49-3.44 (1H, m, Hb-1'), 2.71 (1H, dd, J=7.5, 15.5, Ha-1''), 2.63 (1H, dd, J=5.5, 15.5, Hb-1''), 2.24-2.18 (1H, m, H-3a), 1.95-1.89 (1H, m, H-7a), 1.79-1.71 (1H, m, CH<sub>2</sub>), 1.68-1.51 (3H, m, 3 x CH<sub>2</sub>), 1.38-1.35 (3H, m, 3 x CH<sub>2</sub>), 1.35-1.26 (1H, m, CH<sub>2</sub>), 1.16 (9H, s, tBu); <sup>13</sup>C NMR

(125 MHz, CDCl<sub>3</sub>)  $\delta$  82.0 (C3), 79.3 (C1), 63.8 (C1'), 44.3 (C3''), 43.7 (C1''), 42.0 (C7a), 37.0 (C3a), 26.5, (CH<sub>2</sub>), 26.4 (tBu), 25.1 (CH<sub>2</sub>), 23.6 (CH<sub>2</sub>), 22.5 (CH<sub>2</sub>), missing quaternary C=O; LC-MS (ESI<sup>+</sup>)  $m/z$  255 [M+Na<sup>+</sup>],  $R_t$  1.52 min [method E]; HRMS [M+Na<sup>+</sup>] calcd for C<sub>15</sub>H<sub>26</sub>O<sub>3</sub>Na 277.1779; found 217.1774.

**1-[(1S,3S,3aS,7aR)-3-(hydroxymethyl)-1,3,3a,4,7,7a-hexahydro-2-benzofuran-1-yl]-3,3-dimethylbutan-2-one **48****

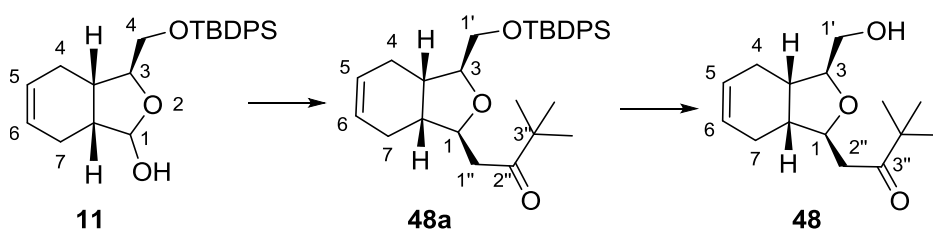

(3S,3aS,7aR)-3-((*tert*-Butyldiphenylsilyloxy)methyl)-1,3,3a,4,7,7a-hexahydroisobenzofuran-1-ol **11** (100 mg, 0.245 mmol) was dissolved in CH<sub>2</sub>Cl<sub>2</sub> (2.8 mL) and cooled to -20 °C. BF<sub>3</sub>·OEt<sub>2</sub> (94  $\mu$ L, 0.735 mmol) was added and the solution was stirred for 5 min. (3,3-Dimethylbut-1-en-2-yl)trimethylsilane (126  $\mu$ L, 0.735 mmol) was then added and the reaction was warmed to RT and stirred for 16 h. The reaction was diluted with CH<sub>2</sub>Cl<sub>2</sub> (20 mL), and washed with H<sub>2</sub>O (2 x 20 mL), followed by brine (20 mL). The organic layer was dried with MgSO<sub>4</sub>. The solvents were removed *in vacuo* and the resultant crude residue was analysed by <sup>1</sup>H NMR and found to be a mixture of diastereoisomers (85:15). The major isomer was isolated by column chromatography on silica gel (10% EtOAc:hexane) to yield **48a** as a clear oil (85 mg, 62%). [ $\alpha$ ]<sub>D</sub><sup>21</sup> +9.0 (c=1.0 CHCl<sub>3</sub>); IR (film) 2931, 2858, 1702, 1473 cm<sup>-1</sup>; <sup>1</sup>H NMR (500 MHz, CDCl<sub>3</sub>)  $\delta$  7.75-7.65 (4H, m, Ph), 7.47-4.36 (6H, m, Ph), 5.77-5.67 (2H, m, H-5, H-6), 4.21 (1H, dd, J=6.0, 12.0, H-1), 3.79 (2H, m, H-3, Ha-1'), 3.71-3.66 (1H, m, Hb-1'), 2.84 (1H, dd, J=6.5, 17.0, Ha-1''), 2.59 (1H, dd, J=6.0, 17.0, Hb-1''), 2.48-2.41 (1H, m, H-3a), 2.35-2.22 (2H, m, Ha-4, Ha-7), 2.18-2.15 (1H, m, H-7a), 2.12-2.06 (2H, m, Hb-4, Hb-7), 1.11 (9H, s, tBu), 1.08 (9H, s, tBu); <sup>13</sup>C NMR (125 MHz, CDCl<sub>3</sub>)  $\delta$  135.6 (2 x Ph), 134.8 (2 x Ph), 133.6 (iPh), 133.5 (iPh), 129.7 (Ph), 129.6 (Ph), 127.7 (2 x Ph), 127.7 (2 x Ph), 125.5 (C5 or C6), 125.2 (C5 or C6), 83.8 (C3), 80.0 (C1), 65.0 (C1'), 44.2 (C3'), 42.4 (C1''), 40.1 (C7a), 35.7 (C3a), 26.9 (tBu), 26.1 (tBu), 24.9 (C4 or C5), 24.6 (C4 or C7), 19.3 (Si-C), missing quaternary C=O; LC-MS (ESI<sup>+</sup>)  $m/z$  513 [M+Na<sup>+</sup>],  $R_t$  2.58 min [method E]; HRMS [M+Na<sup>+</sup>] calcd for C<sub>31</sub>H<sub>42</sub>O<sub>3</sub>SiNa 513.2795 found 513.2808; Found: C, 75.81; H, 8.73%; C<sub>31</sub>H<sub>42</sub>O<sub>3</sub>Si requires: C, 75.87; H, 8.73%.

1-((1S,3S,3aS,7aR)-3-((*tert*-Butyldiphenylsilyloxy)methyl)-1,3,3a,4,7,7a-hexahydroisobenzofuran-1-yl)-3,3-dimethylbutan-2-one **48a** (216 mg, 0.485 mmol) was dissolved in THF (10.0 mL). The solution was cooled to 0 °C under N<sub>2</sub>, then TBAF (1.45 mL, 1.0 M in THF, 1.45 mmol) was added by syringe. The reaction was stirred for 16 h at RT before quenching with

Et<sub>2</sub>O (30 mL). The reaction mixture was washed with H<sub>2</sub>O (30 mL) and extracted into Et<sub>2</sub>O (2 x 30 mL). The combined organic layers were dried with MgSO<sub>4</sub> and solvents were removed *in vacuo* to yield the crude product as a clear oil. This was purified by column chromatography on silica gel (10% EtOAc:hexane) to yield **48** as a clear oil (84 mg, 67%). [ $\alpha$ ]<sup>22</sup><sub>D</sub> +17.6 (c=2.60 CH<sub>2</sub>Cl<sub>2</sub>); IR (film) 3418, 3026, 2967, 2907, 1700, 1478 cm<sup>-1</sup>; <sup>1</sup>H NMR (500 MHz, CDCl<sub>3</sub>)  $\delta$  5.77-5.67 (2H, m, H-5, H-6), 4.16 (1H, dd, J=6.0, 12.0, H-1), 3.80-3.75 (2H, m, H-3, Ha-1'), 3.52-3.47 (1H, m, Hb-1'), 2.73 (1H, dd, J=6.5, 17.0, Ha-1''), 2.59 (1H, dd, J=6.0, 17.0, Hb-1''), 2.42-2.34 (2H, m, H-3a, OH), 2.31-2.27 (2H, m, Ha-4, Hb-7), 2.10-2.03 (1H, m, H-7a), 1.97-1.88 (2H, m, Hb-4, Hb-7); <sup>13</sup>C NMR (125 MHz, CDCl<sub>3</sub>)  $\delta$  125.5 (C5 or C6), 125.1 (C5 or C6), 83.8 (C3), 81.4 (C1), 63.2 (C1'), 44.4 (C3'), 42.2 (C1''), 40.6 (C7a), 35.8 (C3a), 24.9 (C4 or C5), 23.6 (C4 or C7), missing quaternary C=O; LC-MS (ESI<sup>+</sup>) *m/z* 275 [M+Na<sup>+</sup>], R<sub>t</sub> 1.47 min [method E].

### 2-((1R,3S,3aS,7aR)-3-(hydroxymethyl)-1,3,3a,4,7,7a-hexahydroisobenzofuran-1-yl)-2-methylpropan-1-ol **49**

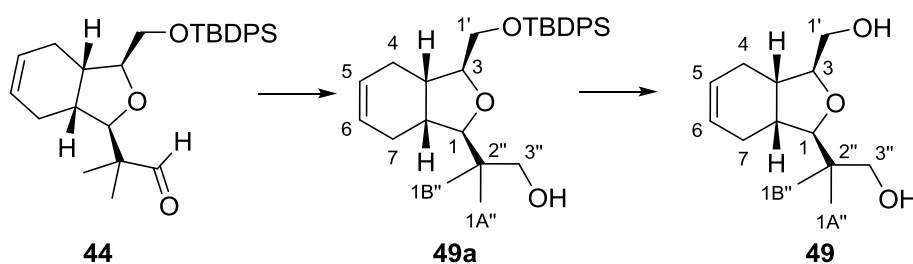

2-[(1R,3S,3aS,7aR)-3-[[*tert*-Butyldiphenylsilyloxy]methyl]-1,3,3a,4,7,7a-hexahydro-2-benzofuran-1-yl]-2-methylpropanal **44** (110 mg, 0.239 mmol) was dissolved in THF:MeOH (4:1 ratio, 2.5 mL) and cooled to 0 °C. NaBH<sub>4</sub> (27 mg, 0.717 mmol) was added and the solution stirred for 1.5 h. The solution was diluted with Et<sub>2</sub>O (10 mL), then washed with H<sub>2</sub>O (10 mL) and brine (10 mL). The organic layer was then dried with MgSO<sub>4</sub>. The solvents were removed *in vacuo* to yield **49a** as a clear oil (93 mg, 82%). [ $\alpha$ ]<sup>22</sup><sub>D</sub> -8.4 (c=1.0 CHCl<sub>3</sub>); IR (film) 3424, 1472 cm<sup>-1</sup>; <sup>1</sup>H NMR (500 MHz, CDCl<sub>3</sub>)  $\delta$  7.76-7.67 (4H, m, Ph), 7.50-7.37 (6H, m, Ph), 5.88-5.74 (2H, m, H-5, H-6), 3.83 (1H, dd, J=5.0, 7.0, Ha-1'), 3.70-3.66 (2H, m, Hb-1', H-3), 3.61 (1H, d, J=5.0, H-1), 3.51-3.47 (2H, m, H-3''), 3.12 (1H, t, J=7.0, OH), 2.33-2.24 (2H, m, H-3a, H-7a), 2.24-2.14 (2H, m, Ha-4, Ha-7), 1.97-1.90 (1H, Hb-4, or Hb-7), 1.86-1.79 (1H, Hb-4, or Hb-7), 1.09 (9H, s, <sup>t</sup>Bu), 1.01 (3H, s, Me), 0.90 (3H, s, Me); <sup>13</sup>C NMR (125 MHz, CDCl<sub>3</sub>)  $\delta$  135.7 (2 x Ph), 135.6 (2 x Ph), 133.4 (iPh), 133.4 (iPh), 129.7 (Ph), 129.6 (Ph), 127.7 (4 x Ph), 127.1 (C5 or C6), 126.7 (C5 or C6), 93.4 (C1), 83.7 (C3), 72.4 (C1'), 64.5 (C3''), 37.9 (C2''), 37.8 (C3a or C7a), 37.4 (C3a or C7a), 27.7 (C4 or C7), 26.8 (<sup>t</sup>Bu), 23.9 (C4 or C7), 22.7 (Me), 19.2 (Si-C), 19.0 (Me); LC-MS (ESI<sup>+</sup>) *m/z* 487 [M+Na<sup>+</sup>], R<sub>t</sub> 3.12 min [method E]; HRMS [M+Na<sup>+</sup>] calcd for C<sub>29</sub>H<sub>40</sub>O<sub>3</sub>SiNa 487.2639 found 487.2637; Found: C, 75.07; H, 8.64%; C<sub>29</sub>H<sub>40</sub>O<sub>3</sub>SiNa requires: C, 74.95; H, 8.68%.

2-[(1R,3S,3aS,7aR)-3-[[*tert*-butyldiphenylsilyl]oxy]methyl]-1,3,3a,4,7,7a-hexahydro-2-benzofuran-1-yl]-2-methylpropan-1-ol **49a** (80 mg, 0.172 mmol) was dissolved in THF (0.5 mL) and TBAF (1.0 M in THF, 1.70 mL) was added. The reaction was stirred at RT for 16 h. The reaction mixture was then diluted with Et<sub>2</sub>O (5 mL) and washed with H<sub>2</sub>O (5 mL x 2). Solvents were removed *in vacuo* and the crude residue was purified by column chromatography on silica gel (15% EtOAc:hexane) to yield **49** as a clear oil (16 mg, 41%). [ $\alpha$ ]<sup>22</sup><sub>D</sub> -8.4 (c=1.0 CHCl<sub>3</sub>); <sup>1</sup>H NMR (500 MHz, CDCl<sub>3</sub>) 5.85-5.78 (2H, m, H-5, H-6), 3.84 (1H, dd, J=5.0, 7.0, Ha-1'), 3.71-3.68 (1H, m, H-1), 3.64-3.60 (2H, m, Hb-1', H-3), 3.50 (1H, d, J=11.0, Ha-3''), 3.46 (1H, d, J=11.0, Hb-3''), 2.31-2.17 (4H, m, H-3a, H-7a, Ha-4, Ha-7), 1.98-1.84 (2H, Hb-4, Hb-7), 0.94 (3H, s, Me), 0.91 (3H, s, Me); <sup>13</sup>C NMR (125 MHz, CDCl<sub>3</sub>)  $\delta$ , 126.7 (C5 or C6), 126.6 (C5 or C6), 93.2 (C1), 83.6 (C3), 71.7 (C1'), 63.0 (C3''), 38.1 (C2''), 37.3 (C3a or C7a), 36.8 (C3a or C7a), 27.8 (C4 or C7), 23.6 (C4 or C7), 22.2 (Me), 19.3 (Me), LC-MS (ESI<sup>+</sup>) *m/z* 227 [M+Na<sup>+</sup>], R<sub>t</sub> 1.38 min [method E]; HRMS [M+Na<sup>+</sup>] calcd for C<sub>13</sub>H<sub>22</sub>O<sub>3</sub> Na 249.1461 found 249.1463.

**2-[(1R,3S,3aS,7aR)-3-[[*tert*-Butyldiphenylsilyl]oxy]methyl]-1,3,3a,4,7,7a-hexahydro-2-benzofuran-1-yl]-2-methylpropyl}(benzyl)amine **50****

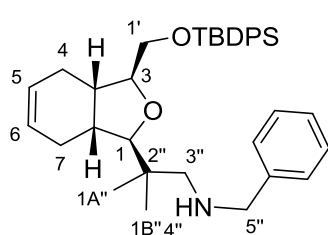

**50**

2-[(1R,3S,3aS,7aR)-3-[[*tert*-Butyldiphenylsilyl]oxy]methyl]-1,3,3a,4,7,7a-hexahydro-2-benzofuran-1-yl]-2-methylpropanal **44** (107 mg, 0.232 mmol) and benzyl amine (25  $\mu$ M, 0.232 mmol) was dissolved in 1,2-dichloroethane (3.0 mL). Sodium triacetoxyborohydride (68 mg, 0.324 mmol) was then added and the solution stirred at RT for 3 h. The reaction mixture was quenched by adding aqueous sat. NaHCO<sub>3</sub> (10 mL), and the solution was extracted with EtOAc. The organic extract was dried (MgSO<sub>4</sub>), and the crude residue was purified by ionic exchange chromatography on acidic resin (5 g) to yield **50** as a clear oil (67 mg, 52%). [ $\alpha$ ]<sup>21.9</sup><sub>D</sub> -7.0 (c=1.0 CH<sub>2</sub>Cl<sub>2</sub>); IR (film) 3028, 2930, 2856, 1471, 1428 cm<sup>-1</sup>; <sup>1</sup>H NMR (500 MHz, CDCl<sub>3</sub>)  $\delta$  7.75-7.69 (4H, m, Ph), 7.46-7.20 (11H, m, Ph), 5.83-5.74 (2H, m, H-5, H-6), 3.89-3.67 (5H, m, H-1, H-1', H-3''), 3.57-3.54 (1H, m, H-3), 2.62 (1H, d, J=12.0, Ha-5''), 2.44 (1H, d, J=12.0, Hb-5''), 2.23-2.11 (4H, m, H-3a, H-7a, Ha-4, Ha-7), 1.97-1.84 (2H, m, Hb-4, Hb-7), 1.07 (9H, s, tBu), 0.93 (3H, s, Me), 0.92 (3H, s, Me); <sup>13</sup>C NMR (125 MHz, CDCl<sub>3</sub>)  $\delta$  135.7 (Ph), 135.6 (Ph), 133.8 (iPh), 133.6 (iPh), 129.6 (Ph), 129.5 (Ph), 128.2 (2 x Ph), 128.6 (2 x Ph), 127.62 (4 x Ph), 127.0 (2 x Ph), 126.8 (C5 or C6), 126.7 (C5 or C6), 91.3 (C3), 83.3 (C1), 65.3 (C1'), 58.5 (C3''), 54.7 (C5''), 38.3 (C3a or C7a), 36.9 (C3a or C7a), 28.0 (C4 or C7), 26.8 (tBu), 24.0 (C2''), 22.9 (C4 or C7), 21.2 (Me), 19.2 (Me); LC-MS (ESI<sup>+</sup>) *m/z* 553 [M+Na<sup>+</sup>], R<sub>t</sub> 2.37 min [method D]; HRMS [M+Na<sup>+</sup>] calcd for C<sub>36</sub>H<sub>48</sub>NO<sub>2</sub>Si 554.3450 found 554.3452.

**{2-[(1R,3S,3aS,7aR)-3-[[*tert*-Butyldiphenylsilyl]oxy]methyl]-1,3,3a,4,7,7a-hexahydro-2-benzofuran-1-yl]-2-methylpropyl}[(3-methoxyphenyl)methyl]amine **51****

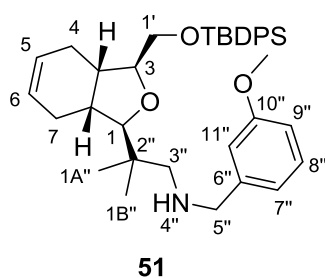

**51**

2-[(1R,3S,3aS,7aR)-3-[[*tert*-Butyldiphenylsilyl]oxy]methyl]-1,3,3a,4,7,7a-hexahydro-2-benzofuran-1-yl]-2-methylpropanal **44** (145 mg, 0.315 mmol) and (3-methoxyphenyl)methanamine (40  $\mu$ M, 0.315 mmol) was dissolved in 1,2-dichloroethane (3.0 mL). Sodium triacetoxyborohydride (86 mg, 0.441 mmol) was then added and the solution stirred at RT for 3 h. The reaction mixture was quenched by adding aqueous sat. NaHCO<sub>3</sub> (10 mL), and the solution was extracted with EtOAc. The EtOAc extract was dried (MgSO<sub>4</sub>), and the crude residue was purified by ionic exchange chromatography on acidic resin (2 g) to yield **51** as a clear oil (115 mg, 62%). [ $\alpha$ ]<sup>24.4</sup><sub>D</sub> -33.7 (c=1.0 CHCl<sub>3</sub>); IR (film) 2931, 2857, 1600, 1586, 1488 cm<sup>-1</sup>; <sup>1</sup>H NMR (500 MHz, CDCl<sub>3</sub>)  $\delta$  7.74-7.70 (4H, m, Ph), 7.45-7.36 (6H, m, Ph), 7.21 (1H, dd, J=8.0, 8.0, H-8''), 6.96-6.89 (2H, m, H-9'', H-11''), 6.84-6.77 (1H, m, H-7''), 5.83-5.76 (2H, m, H-5, H-6), 3.85-3.68 (8H, m, H-1', H-5'', OMe, H-3), 3.58-3.55 (1H, d, J=4.0, H-1), 2.60 (1H, d, J=11.0, Ha-3''), 2.42 (1H, d, J=11.0, Hb-3''), 2.43-2.13 (4H, m, H-3a, H-7a, Ha-4, Ha-7), 1.97-1.86 (2H, Hb-4, Hb-7), 1.07 (9H, s, tBu), 0.93 (3H, s, Me), 0.93 (3H, s, Me); <sup>13</sup>C NMR (125 MHz, CDCl<sub>3</sub>)  $\delta$  159.7 (C8''), 142.7 (C6''), 135.7 (2 x Ph), 135.6 (2 x Ph), 133.7 (iPh), 133.6 (iPh), 129.5 (Ph), 129.5 (Ph), 129.2 (C10''), 127.6 (4 x Ph), 127.0 (C5 or C6), 126.8 (C5 or C6), 120.3 (C11''), 113.3 (C7'' or C9''), 112.4 (C7'' or C9''), 91.3 (C1), 83.3 (C3), 65.4 (C1'), 58.3 (C3''), 55.2 (C12''), 54.0 (C5''), 38.2 (C3a or C7a), 37.8 (C2''), 36.9 (C3a or C7a), 28.0 (C4 or C7), 26.8 (tBu), 24.1 (C4 or C7), 22.9 (Me), 21.9 (Me), 19.2 (Si-C); LC-MS (ESI<sup>+</sup>) *m/z* 584.37 [M+H<sup>+</sup>], R<sub>t</sub> 2.33 min [method D]; HRMS [M+H<sup>+</sup>] calcd for C<sub>37</sub>H<sub>50</sub>NO<sub>3</sub>Si 584.3554 found 584.3568.

**{2-[(1R,3S,3aS,7aR)-3-[[*tert*-Butyldiphenylsilyl]oxy]methyl]-1,3,3a,4,7,7a-hexahydro-2-benzofuran-1-yl]-2-methylpropyl}(methyl)amine **52****

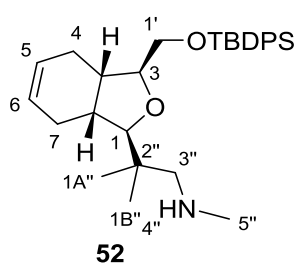

**52**

2-[(1R,3S,3aS,7aR)-3-[[*tert*-Butyldiphenylsilyl]oxy]methyl]-1,3,3a,4,7,7a-hexahydro-2-benzofuran-1-yl]-2-methylpropanal **44** (145 mg, 0.315 mmol) and methylamine (25  $\mu$ M, 0.315 mmol) was dissolved in 1,2-dichloroethane (3.0 mL). Sodium triacetoxyborohydride (86 mg, 0.441 mmol) was added and the solution stirred at RT for 3 h. The reaction mixture was quenched by adding aqueous sat. NaHCO<sub>3</sub> (10 mL), and the solution was extracted with EtOAc. The EtOAc extract was dried over MgSO<sub>4</sub>, and the crude residue was purified by ionic exchange chromatography on acidic resin (2 g) to yield **52** as a clear oil (92 mg, 64%). [ $\alpha$ ]<sup>24.4</sup><sub>D</sub> -28.5 (c=0.41 CHCl<sub>3</sub>); IR (film) 2931, 2857, 1472, 1428 cm<sup>-1</sup>; <sup>1</sup>H NMR (500 MHz, CDCl<sub>3</sub>)  $\delta$  7.75-7.68 (4H, m, Ph), 7.45-7.36 (6H, m, Ph), 5.83-5.76 (2H, m, H-5, H-6), 3.79

(1H, dd, J=4.0, 11.0, Ha-1'), 3.75-3.68 (2H, m, Hb-1', H-3), 3.55-3.51 (1H, d, J=4.0, H-1), 2.59 (1H, d, J=11.5, Ha-3''), 2.42 (3H, s, H-5''), 2.37 (1H, d, J=11.5, Hb-3''), 2.24-2.14 (4H, m, H-3a, H-7a, Ha-4, Ha-7), 1.99-1.85 (2H, m, Hb-4, Hb-7), 1.06 (9H, s, tBu), 0.93 (3H, s, Me), 0.91 (3H, s, Me); <sup>13</sup>C NMR (125 MHz, CDCl<sub>3</sub>) δ 135.7 (2 x Ph), 135.6 (2 x Ph), 133.8 (iPh), 133.6 (iPh), 129.6 (Ph), 129.5 (Ph), 127.6 (2 x Ph), 127.6 (2 x Ph), 127.0 (C5 or C6), 126.8 (C5 or C6), 91.4 (C1), 83.3 (C3), 65.2 (C1'), 61.9 (C3''), 38.2 (C3a or C7a), 37.6 (C2''), 37.6 (C5''), 36.9 (C3a or C7a), 28.1 (C4 or C7), 26.8 (tBu), 24.0 (C4 or C7), 23.1 (Me), 21.1 (Me), 19.2 (Si-C); LC-MS (ESI<sup>+</sup>) *m/z* 478 [M+H<sup>+</sup>], R<sub>t</sub> 2.28 min [method D]; HRMS [M+H<sup>+</sup>] calcd for C<sub>30</sub>H<sub>44</sub>NO<sub>2</sub> 478.3135 found 478.3114.

**{2-[(1R,3S,3aS,7aR)-3-[[*tert*-Butyldiphenylsilyloxy]methyl]-1,3,3a,4,7,7a-hexahydro-2-benzofuran-1-yl]-2-methylpropyl}(propyl)amine **53****

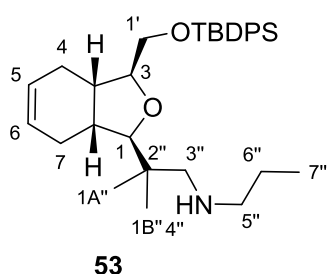

2-[(1R,3S,3aS,7aR)-3-[[*tert*-Butyldiphenylsilyloxy]methyl]-1,3,3a,4,7,7a-hexahydro-2-benzofuran-1-yl]-2-methylpropanal **44** (145 mg, 0.315 mmol) and *n*-propylamine (25 μM, 0.315 mmol) was dissolved in 1,2-dichloroethane (3.0 mL). Sodium triacetoxyborohydride (86 mg, 0.441 mmol) was added and the solution stirred at RT for 3 h. The reaction mixture was quenched by adding aqueous sat. NaHCO<sub>3</sub> (10 mL), and the solution was

extracted with EtOAc. The EtOAc extract was dried (MgSO<sub>4</sub>), and the crude residue was purified by ionic exchange chromatography on acidic resin (2 g) to yield **53** as a clear oil (92 mg, 62%). [α]<sup>24.4</sup><sub>D</sub> -21.3 (c=0.5 CHCl<sub>3</sub>); IR (film) 2956, 2857, 1472 cm<sup>-1</sup>; <sup>1</sup>H NMR (500 MHz, CDCl<sub>3</sub>) δ 7.75-7.68 (4H, m, Ph), 7.46-7.36 (6H, m, Ph), 5.82-5.74 (2H, m, H-5, H-6), 3.82-3.74 (3H, m, H-1', H-3), 3.56 (1H, d, J=4.0, H-1), 2.63-2.50 (3H, m, H-5'', Ha-3''), 2.42 (1H, d, J=11.5, Hb-3''), 2.25-2.13 (4H, m, H-3a, H-7a, Ha-4, Ha-7), 2.00-1.84 (2H, m, Hb-4, Hb-7), 1.50 (2H, dddd, J=7.0, 7.0, 7.0, 7.0, H-6''), 1.07 (9H, s, tBu), 0.91-0.89 (9H, m, Me, Me, H-7''); <sup>13</sup>C NMR (125 MHz, CDCl<sub>3</sub>) δ 135.6 (4 x Ph), 133.7 (iPh), 133.6 (iPh), 129.6 (Ph), 129.5 (Ph), 127.6 (4 x Ph), 127.0 (C5 or C6), 126.8 (C5 or C6), 91.5 (C1), 83.4 (C3), 65.2 (C1'), 59.0 (C3''), 52.8 (C5''), 38.3 (C3a or C4a), 37.6 (C2), 36.9 (C3a or C4a), 28.0 (C4 or C7), 26.0 (tBu), 24.0 (C4 or C7), 22.9 (C6''), 22.9 (C1A'' or C1B''), 21.1 (C1A'' or C1B''), 19.2 (Si-C), 11.7 (C7''); LC-MS (ESI<sup>+</sup>) *m/z* 506 [M+H<sup>+</sup>], R<sub>t</sub> 2.30 min [method D]; HRMS [M+H<sup>+</sup>] calcd for C<sub>32</sub>H<sub>48</sub>NO<sub>2</sub>Si Na 506.3449 found 506.3464.

**{2-[(1R,3S,3aS,7aR)-3-[[*tert*-Butyldiphenylsilyloxy]methyl]-1,3,3a,4,7,7a-hexahydro-2-benzofuran-1-yl]-2-methylpropyl}(2-methoxyethyl)amine **54****



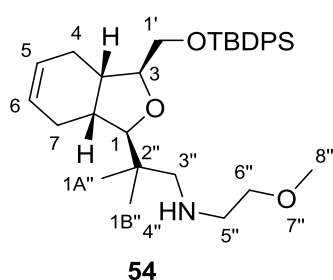

2-[(1R,3S,3aS,7aR)-3-[[*tert*-Butyldiphenylsilyl]oxy]methyl]-1,3,3a,4,7,7a-hexahydro-2-benzofuran-1-yl]-2-methylpropanal **44** (145 mg, 0.315 mmol) and methoxyethyl amine (27  $\mu$ M, 0.315 mmol) was dissolved in 1,2-dichloroethane (3.0 mL). Sodium triacetoxyborohydride (86 mg, 0.441 mmol) was added and the solution stirred at RT for 3 h. The reaction mixture was quenched by adding aqueous sat. NaHCO<sub>3</sub> (10 mL), and the

solution was extracted with EtOAc. The EtOAc extract was dried (MgSO<sub>4</sub>), and the crude residue was purified by ionic exchange chromatography on acidic resin (2 g) to yield **54** as a clear oil (92 mg, 56%).  $[\alpha]^{24.3}_D -28.6$  (c=1.0 CHCl<sub>3</sub>); IR (film) 2930, 2857, 1472, 1428 cm<sup>-1</sup>; <sup>1</sup>H NMR (500 MHz, CDCl<sub>3</sub>)  $\delta$  7.74-7.65 (4H, m, Ph), 7.44-7.36 (6H, m, Ph), 5.82-5.74 (2H, m, H-5, H-6), 3.80-3.66 (3H, m, H-1', H-3), 3.56 (1H, d, J=4.0, H-1), 3.48 (2H, dd, J=5.5, 5.5, H-6''), 3.30 (3H, s, H-8''), 2.81-2.75 (2H, m, H-5''), 2.60 (1H, d J=11.5, Ha-3''), 2.42 (1H, d, J=11.5, Hb-3''), 2.25-2.09 (4H, m, H-3a, H-7a, Ha-4, Ha-7), 1.99-1.79 (2H, m, Hb-4, Hb-7), 1.05 (9H, s, tBu), 0.91 (3H, s, Me), 0.90 (3H, s, Me); <sup>13</sup>C NMR (125 MHz, CDCl<sub>3</sub>)  $\delta$  135.6 (4 x Ph), 133.7 (iPh), 133.6 (iPh), 129.6 (Ph), 129.5 (Ph), 127.6 (4 x Ph), 127.0 (C5 or C6), 126.8 (C5 or C6), 91.2 (C1), 83.2 (C3), 72.0 (C6''), 65.2 (C1'), 58.9 (C3'' or C8''), 58.7 (C3'' or C8''), 50.4 (C5''), 38.3 (C3a or C7a), 37.8 (C2''), 36.8 (C3a or C7a), 28.0 (C4 or C7), 26.8 (tBu), 24.1 (C4 or C7), 22.3 (Me), 21.2 (Me), 19.2 (Si-C); LC-MS (ESI<sup>+</sup>) *m/z* 522 [M+H<sup>+</sup>], R<sub>t</sub> 2.30 min [method D]; HRMS [M+H<sup>+</sup>] calcd for C<sub>32</sub>H<sub>48</sub>NO<sub>3</sub>Si 522.3398 found 522.3409; Found: C, 73.75%; H, 9.00%; C<sub>32</sub>H<sub>47</sub>NO<sub>3</sub>Si requires: C, 73.66%; H, 9.08%.

**[(1S,3R,3aR,7aS)-3-[1-(benzylamino)-2-methylpropan-2-yl]-1,3,3a,4,7,7a-hexahydro-2-benzofuran-1-yl]methanol 55**

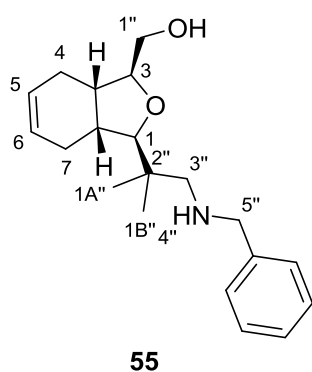

{2-[(1R,3S,3aS,7aR)-3-[[*tert*-butyldiphenylsilyl]oxy]methyl]-1,3,3a,4,7,7a-hexahydro-2-benzofuran-1-yl]-2-methylpropyl}(benzyl)amine **50** (50 mg, 0.090 mmol) was dissolved in THF (1 mL). TBAF (1.0 M in THF, 0.27 mL, 0.27 mmol) was added and the reaction stirred at 0°C for 6 h. The solution was diluted with Et<sub>2</sub>O (20 mL) and washed with H<sub>2</sub>O (2 x 20 mL), brine (20 mL) and the organic layer was dried with MgSO<sub>4</sub>. The crude residue was purified by ionic exchange chromatography on acidic resin (2 g) to yield **55** as a clear oil (18 mg, 63%).  $[\alpha]^{21}_D -10.5$

(c=1.0 CHCl<sub>3</sub>); IR (film) 3319, 2930, 2839, 1495, 1453 cm<sup>-1</sup>; <sup>1</sup>H NMR (500 MHz, CDCl<sub>3</sub>)  $\delta$  7.35-7.34 (4H, m, Ph), 7.29-7.24 (1H, m, Ph), 5.81-5.74 (2H, m, H-5, H-6), 3.86-3.81 (2H, m, Ha-1', Ha-5''), 3.73 (1H, d, J=13.0, Hb-5''), 3.68 (1H, ddd, J=3.0, 3.0, 8.5, H-3), 3.56-3.52 (2H, m, Hb-1', H-1), 2.61 (1H, d, J=12.0, Ha-3''), 2.38 (1H, d, J=12.0, Hb-3''), 2.34-2.15 (4H, m, H-7a, H-3a, Ha-4, Ha-7), 1.97-1.83 (2H, m, Hb-4, Hb-7), 1.00 (3H, s, Me), 0.83 (3H, s, Me); <sup>13</sup>C NMR

(125 MHz, CDCl<sub>3</sub>)  $\delta$  128.4 (4x Ph), 128.3 (Ph), 127.2 (Ph), 126.5 (C5 or C6), 126.4 (C5 or C6), 92.7 (C1), 83.6 (C3), 62.5 (C1'), 57.3 (C3''), 24.5 (C5''), 37.5 (C2''), 37.0 (C3a or C7a), 36.2 (C3a or C7a), 27.9 (C4 or C7), 23.9 (C4 or C7), 23.8 (Me), 23.2 (Me); LC-MS (ESI<sup>+</sup>)  $m/z$  316 [M+H<sup>+</sup>],  $R_t$  1.73 min [method D]; HRMS [M+H<sup>+</sup>] calcd for C<sub>20</sub>H<sub>30</sub>NO<sub>2</sub> 316.2271 found 316.2278.

**[(1S,3R,3aR,7aS)-3-(1-[[[3-Methoxyphenyl)methyl]amino]-2-methylpropan-2-yl]-1,3,3a,4,7,7a-hexahydro-2-benzofuran-1-yl)methanol 56**

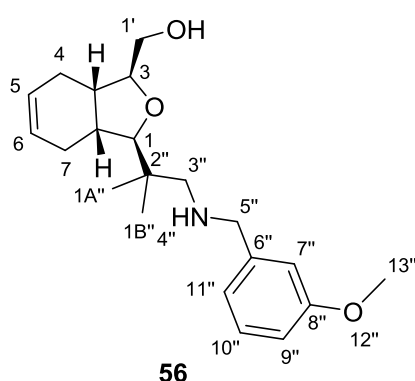

{2-[(1R,3S,3aS,7aR)-3-[[*tert*-Butyldiphenylsilyl]oxy]methyl]-1,3,3a,4,7,7a-hexahydro-2-benzofuran-1-yl]-2-methylpropyl}[(3-methoxyphenyl)methyl]amine **51** (69 mg, 0.118 mmol), was dissolved in THF (1.3 mL). TBAF (1.0 M in THF, 0.35 mL, 0.35 mmol) was added and the reaction stirred at 0 °C for 6 h. The solution was diluted with Et<sub>2</sub>O (20 mL) and washed with H<sub>2</sub>O (2 x 20 mL), brine (20 mL) and the organic layer was dried with MgSO<sub>4</sub>. The crude residue

was purified by ionic exchange chromatography on acidic resin (2 g) to yield **56** as a clear oil (26 mg, 63%). [ $\alpha$ ]<sub>D</sub><sup>21</sup> -6.7 (c=2.0 CHCl<sub>3</sub>); IR (film) 2938, 1600, 1489, 1466, 1252 cm<sup>-1</sup>; <sup>1</sup>H NMR (500 MHz, CDCl<sub>3</sub>)  $\delta$  7.29-7.24 (1H, m, Ph), 7.00-6.92 (2H, m, Ph), 6.85-6.80 (1H, m, Ph), 5.82-5.77 (2H, m, H-5, H-6), 3.89-3.79 (6H, m, Ha-1', H-3''), 3.76 (3H, s, H-13''), 3.70-3.65 (1H, m, H-3), 3.57-3.52 (2H, m, Hb-1', H-1), 2.66 (1H, d, J=12.0, Ha-5''), 2.42 (1H, d, J=12.0, Hb-5''), 2.32-2.14 (4H, m, H-3a, H-7a, Ha-4, Hb-7), 1.96-1.83 (2H, m, H-4, H-7), 1.01 (3H, s, Me), 0.92 (3H, s, Me); <sup>13</sup>C NMR (125 MHz, CDCl<sub>3</sub>)  $\delta$  159.3 (C8''), 128.9 (Ph), 126.1 (C5 or C6), 125.8 (C5 or C6), 120.8 (Ph), 119.9 (Ph), 113.5 (Ph), 113.1 (Ph), 92.3 (C1), 83.2 (C3), 61.9 (C1'), 56.5 (C5''), 54.7 (C13''), 53.6 (C3''), 36.9 (C2''), 36.5 (C3a or C7a), 35.8 (C3a or C7a), 27.4 (C4 or C7), 23.3 (C4 or C7), 23.0 (Me), 22.3 (Me); LC-MS (ESI<sup>+</sup>)  $m/z$  346 [M+H<sup>+</sup>],  $R_t$  1.53 min [method D]; HRMS [M+H<sup>+</sup>] calcd for C<sub>21</sub>H<sub>32</sub>NO<sub>3</sub> 346.2376 found 346.2386.

**[(1S,3R,3aR,7aS)-3-[2-Methyl-1-(methylamino)propan-2-yl]-1,3,3a,4,7,7a-hexahydro-2-benzofuran-1-yl)methanol 57**

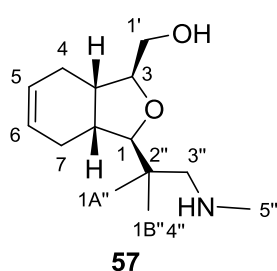

{2-[(1R,3S,3aS,7aR)-3-[[*tert*-Butyldiphenylsilyl]oxy]methyl]-1,3,3a,4,7,7a-hexahydro-2-benzofuran-1-yl]-2-methylpropyl}(methyl)amine **52** (84 mg, 0.176 mmol), was dissolved in THF (2 mL). TBAF (1.0 M in THF, 0.53 mL, 0.53 mmol) was added and the reaction stirred at 0 °C for 4 h. The solution was diluted with

Et<sub>2</sub>O (20 mL) and washed with H<sub>2</sub>O (2 x 20 mL), brine (20 mL) and the organic layer was dried with MgSO<sub>4</sub>. The crude residue was purified by ionic exchange chromatography on acidic resin (2 g) to yield **57** as a clear oil (25 mg, 60%). [ $\alpha$ ]<sup>21</sup><sub>D</sub> -16.1 (c=1.0 CHCl<sub>3</sub>); IR (film) 3327, 3027, 2932, 1472, 1443 cm<sup>-1</sup>; <sup>1</sup>H NMR (500 MHz, CDCl<sub>3</sub>)  $\delta$  5.83-5.72 (2H, m, H-5, H-6), 3.86 (1H, dd, J=2.5, 12.0, Ha-1'), 3.68 (1H, ddd, J=2.5, 2.5, 9.0, H-3), 3.54-3.50 (2H, m, Hb-1', H-1), 2.58 (1H, d, J=12.0, Ha-3''), 2.36 (3H, s, H-5''), 2.35-2.16 (5H, m, Hb-3'', H-3a, H-7a, Ha-4, Ha-7), 1.98-1.82 (2H, m, Hb-4, Hb-7), 1.04 (3H, s, Me), 0.87 (3H, s, Me); <sup>13</sup>C NMR (125 MHz, CDCl<sub>3</sub>)  $\delta$  126.4 (C5 or C6), 126.1 (C5 or C6), 93.1 (C1), 83.7 (C3), 62.1 (C1'), 60.5 (C3''), 37.5 (C2''), 27.1 (C7a or C3a), 36.9 (C5''), 35.0 (C3a or C7a), 28.0 (C4 or C7), 24.4 (Me), 23.9 (C4 or C7), 23.8 (Me); LC-MS (ESI<sup>+</sup>) *m/z* 240 [M+H<sup>+</sup>], R<sub>t</sub> 1.43 min [method D]; HRMS [M+H<sup>+</sup>] calcd for C<sub>14</sub>H<sub>26</sub>NO<sub>2</sub> 240.1958 found 240.1967.

**[(1S,3R,3aR,7aS)-3-[2-methyl-1-(propylamino)propan-2-yl]-1,3,3a,4,7,7a-hexahydro-2-benzofuran-1-yl]methanol 58**

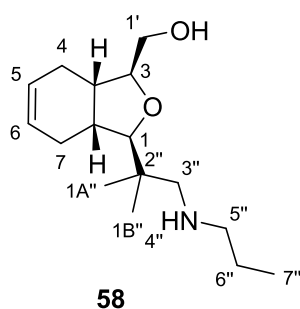

{2-[(1R,3S,3aS,7aR)-3-[[*tert*-Butyldiphenylsilyl]oxy]methyl]-1,3,3a,4,7,7a-hexahydro-2-benzofuran-1-yl]-2-methylpropyl}(propyl)amine **53** (84 mg, 0.144 mmol), was dissolved in THF (2 mL). TBAF (1.0 M in THF, 0.43 mL, 0.43 mmol) was added and the reaction stirred at 0 °C for 4 h. The solution was diluted with Et<sub>2</sub>O (20 mL) and washed with H<sub>2</sub>O (2 x 20 mL), brine (20 mL) and the organic layer was dried with MgSO<sub>4</sub>. The crude residue was purified by ionic exchange chromatography on acidic resin (2 g) to yield **58** as a clear oil (36 mg, 93%). [ $\alpha$ ]<sup>21</sup><sub>D</sub> -25.6 (c=1.0 CHCl<sub>3</sub>); IR (film) 3313, 3027, 2931, 2872, 1467 cm<sup>-1</sup>; <sup>1</sup>H NMR (500 MHz, CDCl<sub>3</sub>)  $\delta$  5.83-5.74 (2H, m, H-5, H-6), 3.88 (1H, dd, J=2.0, 12.0, Ha-1'), 3.68 (1H, ddd, J=2.0, 2.0, 9.0, H-3), 3.57-3.52 (2H, m, Hb-1', H-1), 2.69 (1H, d, J=12.0, Ha-3''), 2.66-2.59 (1H, m, Ha-5''), 2.55-2.49 (1H, m, Hb-5''), 2.40 (1H, d, J=12.0, Hb-3''), 2.32-2.17 (4H, m, Ha-4, Ha-7, H-3a, H-7a), 1.98-1.83 (2H, m, Hb-4, Hb-7), 1.67-1.50 (2H, m, H-6''), 1.06 (3H, s, Me), 0.94 (3H, s, Me), 0.92 (3H, t, J=7.0, J-7''); <sup>13</sup>C NMR (125 MHz, CDCl<sub>3</sub>)  $\delta$  126.7 (C5 or C6), 126.0 (C5 or C6), 93.7 (C1), 84.1 (C3), 61.2 (C1'), 58.8 (C3''), 51.7 (C5''), 37.2 (C3a or C7a), 36.9 (C2''), 35.5 (C3a or C7a), 28.0 (C4 or C7), 24.5 (Me), 23.6 (C4 or C7), 21.6 (Me), 20.4 (C6''), 11.4 (C7''); LC-MS (ESI<sup>+</sup>) *m/z* 268 [M+H<sup>+</sup>], R<sub>t</sub> 1.55 min [method D]; HRMS [M+H<sup>+</sup>] calcd for C<sub>16</sub>H<sub>31</sub>NO<sub>2</sub> 268.2271 found 268.2273.

**[(1S,3R,3aR,7aS)-3-{1-[(2-Methoxyethyl)amino]-2-methylpropan-2-yl}-1,3,3a,4,7,7a-hexahydro-2-benzofuran-1-yl]methanol 59**

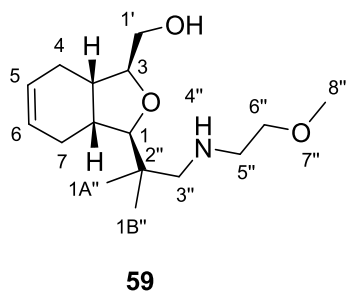

{2-[(1R,3S,3aS,7aR)-3-[[[tert-Butyldiphenylsilyl]oxy]methyl]-1,3,3a,4,7,7a-hexahydro-2-benzofuran-1-yl]-2-methylpropyl}(2-methoxyethyl)amine **54** (94 mg, 0.180 mmol), was dissolved in THF (2 mL). TBAF (1.0 M in THF, 0.54 mL, 0.54 mmol) was added and the reaction stirred at 0 °C for 6 h. The solution was diluted with Et<sub>2</sub>O (20 mL) and washed with H<sub>2</sub>O (2 x 20 mL), brine (20 mL) and the organic layer was dried with MgSO<sub>4</sub>. The crude residue was purified by ionic exchange chromatography on acidic resin (2 g) to yield **59** as a clear oil (25 mg, 49%). [ $\alpha$ ]<sup>21</sup><sub>D</sub> -21.2 (c=1.0 CHCl<sub>3</sub>); IR (film) 3331, 2875, 2839, 1457, 1097 cm<sup>-1</sup>; <sup>1</sup>H NMR (500 MHz, CDCl<sub>3</sub>)  $\delta$  5.81-5.76 (2H, m, H-5, H-6), 3.87 (1H, dd, J=2.0, 12.0, Ha-1') 3.69 (1H, ddd, J=3.0, 3.0, 9.0, H-3), 3.57-3.51 (4H, Hb-1', H-1, H-6''), 3.38 (3H, s, H-8''), 2.77-2.72 (2H, m, H-5''), 2.66 (1H, d, J=12.0, Ha-3''), 2.43 (1H, d, J=12.0, Hb-3''), 2.35-2.31 (1H, m, H-3a), 2.30-2.17 (3H, m, Ha-4, Ha-7, H-7a), 1.98-1.84 (2H, m, Hb-4, Hb-7), 1.06 (3H, s, Me), 0.92 (3H, s, Me); <sup>13</sup>C NMR (125 MHz, CDCl<sub>3</sub>)  $\delta$  126.0 (C5 or C6), 125.7 (C5 or C6), 92.9 (C3), 83.3 (C1), 70.6 (C6''), 61.8 (C1'), 58.3 (C8''), 57.9 (C3''), 49.6 (C5''), 36.9 (C2''), 36.6 (C7a), 35.4 (C3a), 27.5 (C4 or C7), 23.6 (Me), 23.4 (C4 or C7), 23.2 (Me); LC-MS (ESI<sup>+</sup>) *m/z* 284 [M+H<sup>+</sup>], R<sub>t</sub> 1.52 min [method D]; HRMS [M+H<sup>+</sup>] calcd for C<sub>16</sub>H<sub>30</sub>NO<sub>3</sub> 284.2220 found 284.2230; Found: C, 67.90; H, 10.36%; C<sub>16</sub>H<sub>29</sub>NO<sub>3</sub> requires: C, 67.81; H, 10.31%.

**[(1S,3S,3aR,7aS)-3-(2-methoxy-3-phenylpropyl)-octahydro-2-benzofuran-1-yl]methanol 60**

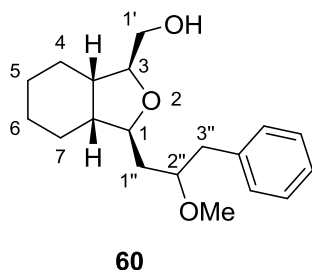

Trimethyl(phenyl)silane (0.155 mL, 0.903 mmol), Ph<sub>3</sub>PAuCl (11 mg, 0.023 mmol) and Selectfluor (346 mg, 0.903 mmol) was added to a solution of ((1S,3S,3aR,7aS)-3-allyloctahydroisobenzofuran-1-yl)methanol **25** (196 mg, 1.000 mmol) in MeOH:MeCN (1:5, 4.8 mL) and heated to 70 °C for 5 h. The reaction was cooled to RT and TBAF (1.0 M in THF, 1.35 mL, 1.35 mmol) was added. The resultant solution was stirred at RT for 16 h. The reaction mixture was then diluted with Et<sub>2</sub>O (10 mL) and washed with H<sub>2</sub>O (10 mL x 2). Solvents were removed *in vacuo* and the crude residue was purified by column chromatography on silica gel (15% EtOAc:hexane) to yield **60** as a mixture of diastereoisomers (39 mg, 29%). IR (film) 3406, 3028, 2926, 1451 cm<sup>-1</sup>; <sup>1</sup>H NMR (500 MHz, CDCl<sub>3</sub>)  $\delta$  7.34-7.27 (2H, m, Ph), 7.25-7.20 (3H, m, Ph), 4.00 (0.8H, ddd, J=4.0, 4.0, 8.5, H-1), 3.93 (0.2H, ddd, J=3.5, 3.5, 8.5, H-3), 3.88-3.84 (0.8H, m, H-3), 3.80 (0.2H, ddd, J=4.0, 4.0, 10.0, H-1), 3.78 (0.2H, dd, J=3.0, 11.5, Ha-1'), 3.66-3.63 (0.8H, m, H-2''), 3.60-3.54 (1H, m, Ha-1', H-2''), 3.48-3.41 (0.2H, m, Hb-1'), 3.42 (2.4H, s, OMe), 3.36 (0.6H, s, OMe), 3.30-3.23 (0.8H, m, Hb-1'), 2.99 (0.8H, dd, J=5.5, 13.5, Ha-3''), 2.91 (0.2H, dd, J=5.5, 13.5, Ha-3''), 2.75 (0.2H, dd, J=7.0, 13.5, Hb-3''), 2.69 (0.8H, dd, J=7.5, 14.0, Hb-3''), 2.35-2.28 (0.2H, m, H-3a),

2.08-1.98 (0.8H, m, H-3a), 1.85-1.77 (1H m, H-7a), 1.68-1.24 (10H, m, H-4, H-5, H-6, H-7, H-1'');  $^{13}\text{C}$  NMR (125 MHz,  $\text{CDCl}_3$ )  $\delta$  **MAJOR**: 139.3 (iPh), 130.3 (2 x Ph), 129.1 (2 x Ph), 127.0 (Ph), 82.7 (C3), 80.6 (C1), 80.5 (C2''), 65.0 (C1'), 58.1 (OMe), 44.4 (C7a), 41.5 (C1''), 40.8 (C3''), 38.3 (C3a), 27.2 ( $\text{CH}_2$ ), 26.1 ( $\text{CH}_2$ ), 24.3 ( $\text{CH}_2$ ), 23.4 ( $\text{CH}_2$ ), **MINOR**: 139.0 (iPh), 130.1 (2 x Ph), 129.0 (2 x Ph), 126.9 (Ph), 83.1 (C3), 82.1 (C2''), 82.5 (C1), 63.6 (C1'), 57.5 (OMe), 44.6 (C7a), 41.1 (C3''), 40.4 (C1''), 36.8 (C3a), 27.7 ( $\text{CH}_2$ ), 25.5 ( $\text{CH}_2$ ), 24.8 ( $\text{CH}_2$ ), 22.6 ( $\text{CH}_2$ ); LC-MS (ESI<sup>+</sup>)  $m/z$  327 [ $\text{M}+\text{Na}^+$ ],  $R_t$  1.52 min [method E].

**Ethyl (2E)-4-[(1R,3S,3aS,7aR)-3-[[*tert*-butyldiphenylsilyl]oxy]methyl]-1,3,3a,4,7,7a-hexahydro-2-benzofuran-1-yl]-4-methylpent-2-enoate 61**

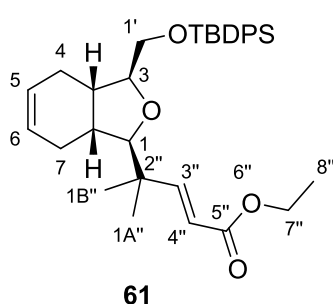

NaH (60 mg, 60% w/w mineral oil, 1.519 mmol) was added to THF (5 mL) to form a suspension. Triethylphosphonate (370  $\mu\text{L}$ , 1.870 mmol) was added dropwise followed by a solution of 2-[(1R,3S,3aS,7aR)-3-[[*tert*-butyldiphenylsilyl]oxy]methyl]-1,3,3a,4,7,7a-hexahydro-2-benzofuran-1-yl]-2-methylpropanal **44** (469 mg, 1.167 mmol) in THF (7 mL). The reaction was stirred at RT for 16 h. The reaction was then diluted in  $\text{Et}_2\text{O}$  (50 mL), washed with  $\text{H}_2\text{O}$  (50 mL x 2) and brine (50 mL). The combined aqueous layers were extracted into  $\text{CH}_2\text{Cl}_2$ , and the organic layers dried over  $\text{MgSO}_4$ . Solvents were removed *in vacuo* to yield the crude product as a clear oil (660 mg). The product was purified by column chromatography on silica gel (5% EtOAc:hexane) to yield **61** as a clear oil (361 mg, 58%).  $[\alpha]^{24.7}_{\text{D}} -22.9$  ( $c=1.0$   $\text{CHCl}_3$ ); IR (film) 2931, 2858, 1716  $\text{cm}^{-1}$ ;  $^1\text{H}$  NMR (500 MHz,  $\text{CDCl}_3$ )  $\delta$  7.76-7.69 (4H, m, Ph), 7.47-7.37 (6H, m, Ph), 7.03 (1H, d,  $J=16.0$ , H-3''), 5.81 (1H, d,  $J=16.0$ , H-4''), 5.80-5.77 (2H, m, H-5, H-6), 4.19 (2H, dq,  $J=1.5, 7.0$ , H-7''), 3.80-3.72 (3H, m, H-1', H-3), 3.51 (1H,  $J=5.0$ , H-1), 2.24-2.07 (4H, m, H-3a, H-7a, Ha-4, Hb-7), 1.95-1.88 (2H, m, Hb-4, Hb-7), 1.28 (3H, t,  $J=7.0$ , H-8''), 1.11 (3H, s, H-1A'' or H-1B''), 1.10 (3H, s, H-1A'' or H-1B''), 1.08 (9H, s,  $^t\text{Bu}$ );  $^{13}\text{C}$  NMR (125 MHz,  $\text{CDCl}_3$ )  $\delta$  166.9 (C5''), 155.4 (C3''), 135.7 (2 x Ph), 135.6 (2 x Ph), 133.7 (iPh), 133.6 (iPh), 129.6 (Ph), 129.6 (Ph), 127.8 (2 x Ph), 127.7 (2 x Ph), 126.9 (C5 or C6), 126.4 (C5 or C6), 119.0 (C4''), 91.6 (C1), 83.7 (C3), 65.3 (C1'), 60.2 (C7''), 40.8 (C2''), 38.1 (C3a or C7a), 37.2 (C3a or C7a), 27.6 (C4 or C7), 26.8 ( $^t\text{Bu}$ ), 24.1 (C4 or C7), 23.4 (Me), 22.6 (Me), 19.2 (Si-C), 14.3 (C8''); LC-MS (ESI<sup>+</sup>)  $m/z$  555 [ $\text{M}+\text{Na}^+$ ],  $R_t$  3.15 min [method E]; HRMS [ $\text{M}+\text{H}^+$ ] calcd for  $\text{C}_{33}\text{H}_{44}\text{O}_4\text{SiNa}$  555.2901 found 555.2917.

**Ethyl 4-[(1R,3S,3aS,7aR)-3-[[*tert*-butyldiphenylsilyl]oxy]methyl] octahydro-2-benzofuran-1-yl]-4-methylpentanoate 62**

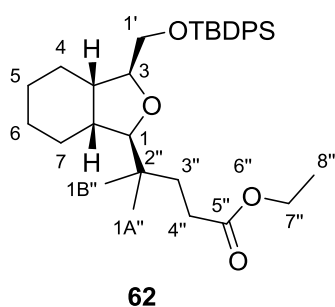

Ethyl

(2E)-4-[(1R,3S,3aS,7aR)-3-[[*tert*-

*butyldiphenylsilyl*]oxy]methyl]-1,3,3a,4,7,7a-hexahydro-2-benzofuran-1-yl]-4-methylpent-2-enoate **61** (587 mg, 1.105 mmol) was dissolved in EtOAc (11 mL). Palladium on activated carbon (30 mg, 10% w/w Pd) was added. The flask was evacuated and flushed with H<sub>2</sub>, and left to stir under an atmosphere of H<sub>2</sub> for 5 d. The suspension was filtered through celite and the solvents removed *in vacuo* to yield **62** as a clear oil

(592 mg, 97%). [ $\alpha$ ]<sup>24.7</sup><sub>D</sub> -7.0 (c=1.0 CHCl<sub>3</sub>); IR (film) 2930, 2858, 1733, 1472 cm<sup>-1</sup>; <sup>1</sup>H NMR (500 MHz, CDCl<sub>3</sub>)  $\delta$  7.66-7.60 (4H, m, Ph), 7.36-7.27 (6H, m, Ph), 4.03 (2H, q, J=7.5, H-7''), 3.84 (1H, ddd, J=4.5, 9.0, 9.0, H-3), 3.71 (1H, dd, J=4.0, 11.0, Ha-1'), 3.59 (1H, dd, J=4.5, 11.0, Hb-1'), 3.27 (1H, d, J=2.5, H-1), 2.29 (1H, dd, J=5.0, 10.5, Ha-4''), 2.28 (1H, J=6.0, 10.5, Hb-4''), 1.99-1.91 (2H, m, H-3a, H-7a), 1.64-1.45 (8H, m, 8 x CH<sub>2</sub>), 1.49-1.20 (2H, m, 2 x CH<sub>2</sub>), 1.16 (3H, t, J=7.5, H-8''), 1.01 (9H, s, tBu), 0.77 (3H, s, Me), 0.75 (3H, s, Me); <sup>13</sup>C NMR (125 MHz, CDCl<sub>3</sub>)  $\delta$  174.5 (C5''), 135.7 (2 x Ph), 135.6 (2 x Ph), 133.8 (iPh), 133.6 (iPh), 129.5 (Ph), 129.5 (Ph), 127.6 (4 x Ph), 91.9 (C1), 80.1 (C3), 65.4 (C1'), 60.2 (C7''), 38.8 (C3a, C7a), 36.6 (C2''), 34.0 (CH<sub>2</sub>), 30.3 (CH<sub>2</sub>), 29.5 (CH<sub>2</sub>), 26.8 (tBu), 24.6 (2 x CH<sub>2</sub>), 24.0 (CH<sub>2</sub>), 22.6 (Me), 22.4 (Me), 22.1 (CH<sub>2</sub>), 19.21 (C-Si), 14.2 (C8''); LC-MS (ESI<sup>+</sup>) *m/z* 559 [M+Na<sup>+</sup>], R<sub>t</sub> 3.50 min [method E]; HRMS [M+Na<sup>+</sup>] calcd for C<sub>33</sub>H<sub>48</sub>O<sub>4</sub>SiNa 559.3214 found 559.3224; Found: C, 74.02; H, 8.91%; C<sub>33</sub>H<sub>48</sub>O<sub>4</sub>Si requires: C, 73.83; H, 9.01%.

### Ethyl 4-[(1R,3S)-3-(hydroxymethyl)octahydro-2-benzofuran-1-yl]-4-methylpentanoate **63**

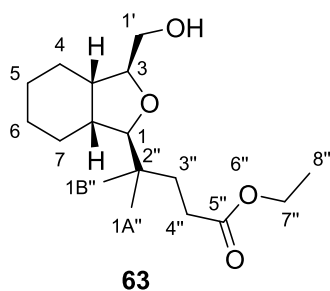

Ethyl

4-[(1R,3S,3aS,7aR)-3-[[*tert*-

*butyldiphenylsilyl*]oxy]methyl]octahydro-2-benzofuran-1-yl]-4-methylpentanoate **62** (221 mg, 0.412 mmol) was dissolved in THF (4 mL). TBAF (1.0 Mol in THF, 1.23 mL, 1.23 mmol) was added and the reaction stirred at 0 °C for 4 h. The solution was diluted with Et<sub>2</sub>O (20 mL) and washed with H<sub>2</sub>O (2 x 20 mL), brine (20 mL) and the organic layer was dried with MgSO<sub>4</sub>. The

product was purified by column chromatography on silica gel (15% EtOAc:hexane) to yield **63** as a clear oil (89 mg, 72%). [ $\alpha$ ]<sup>24.6</sup><sub>D</sub> +7.3 (c=3.0 CHCl<sub>3</sub>); IR (film) 2931, 1723, 1450 cm<sup>-1</sup>; <sup>1</sup>H NMR (500 MHz, CDCl<sub>3</sub>)  $\delta$  4.11 (2H, dq, J= 1.5, 7.0, H-7''), 3.89 (1H, ddd, J=3.0, 6.0, 10.5, H-3), 3.76 (1H, br d, J=11.5, Ha-1'), 3.51 (1H, dd, J=6.0, 11.5, Hb-1'), 3.35 (1H, d, J=3.0, H-1), 2.32 (1H, ddd, J=6.5, 10.5, 15.5, Ha-4''), 2.27 (1H, ddd, J=6.5, 10.5, 15.5, Hb-4''), 2.07-1.99 (1H, m, H-7a), 1.92-1.86 (1H, m, H-3a), 1.67-1.52 (6H, m, CH<sub>2</sub>), 1.50-1.44 (1H, m, CH<sub>2</sub>), 1.41-1.20 (3H, m, CH<sub>2</sub>), 1.24 (3H, t, J=7.0, H-8''), 0.83 (3H, s, Me), 0.81 (3H, s, Me); <sup>13</sup>C NMR (125 MHz, CDCl<sub>3</sub>)  $\delta$  174.4 (C5''), 92.3 (C1), 79.9 (C3), 64.2 (C1'), 60.3 (C4'), 39.1 (C7a), 38.1 (C3a), 36.5 (C2''), 34.0 (CH<sub>2</sub>), 30.3 (CH<sub>2</sub>), 29.5 (CH<sub>2</sub>), 24.5 (CH<sub>2</sub>), 23.8 (CH<sub>2</sub>), 22.9 (Me), 22.3 (Me), 21.9

(CH<sub>2</sub>), 14.2 (C8''); LC-MS (ESI<sup>+</sup>) *m/z* 321.24 [M+Na<sup>+</sup>], *R<sub>t</sub>* 1.72 min [method E]; HRMS [M+H<sup>+</sup>] calcd for C<sub>17</sub>H<sub>30</sub>O<sub>4</sub>H 298.2144 found 298.2151;

#### 4-[(1R,3S,3aS,7aR)-3-(hydroxymethyl)octahydro-2-benzofuran-1-yl]-4-methylpentanoic acid **64**

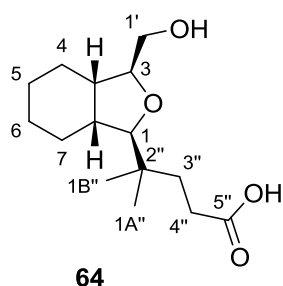

Ethyl 4-[(1R,3S)-3-(hydroxymethyl)octahydro-2-benzofuran-1-yl]-4-methylpentanoate **63** (95 mg, 0.319 mmol) was dissolved in THF:H<sub>2</sub>O (3.0 mL, 2:1 ratio) and LiOH·H<sub>2</sub>O (23 mg, 7.9 mmol) was added. The solution was stirred at RT for 16 h. The reaction mixture was acidified to pH 4 with 1 M HCl. The solution was extracted with CH<sub>2</sub>Cl<sub>2</sub> (4 x 5 mL). The combined organic layers were dried over MgSO<sub>4</sub> and the solvents removed *in vacuo* to yield **64** as a clear oil (81 mg, 99%). [ $\alpha$ ]<sup>24.2</sup><sub>D</sub> +17.8 (c=1.0 CHCl<sub>3</sub>); IR (film) 2928, 2858, 1708, 1451 cm<sup>-1</sup>; <sup>1</sup>H NMR (500 MHz, CDCl<sub>3</sub>)  $\delta$  3.96 (1H, ddd, J=2.5, 6.0, 10.0, H-3), 3.77 (1H, dd, H=2.5, 12.0, Ha-1'), 3.55 (1H, dd, J=6.0, 12.0, Hb-1'), 3.40 (1H, d, J=3.0, H-1), 2.37 (1H, ddd, J=6.0, 12.0, 16.0, Ha-4''), 2.30 (1H, ddd, J=6.0, 12.0, 16.0, Hb-4''), 2.09-2.02 (1H, m, H-7a), 1.95-1.88 (1H, m, H-3a), 1.71-1.46 (7H, m, H-3'', 3 x CH<sub>2</sub>), 1.42-1.21 (3H, m, CH<sub>2</sub>), 0.85 (3H, s, H-1A''), 0.84 (3H, s, H-1B''); <sup>13</sup>C NMR (125 MHz, CDCl<sub>3</sub>)  $\delta$  178.5 (C5''), 92.3 (C1), 80.5 (C3), 64.2 (C1'), 39.1 (C7a), 38.0 (C3a), 36.4 (C2''), 33.9 (C3''), 30.3 (CH<sub>2</sub>), 29.0 (C4''), 24.5 (CH<sub>2</sub>), 23.7 (CH<sub>2</sub>), 23.1 (C1A''), 22.1 (C1B''), 21.8 (CH<sub>2</sub>); LC-MS (ESI<sup>+</sup>) *m/z* 293 [M+Na<sup>+</sup>], *R<sub>t</sub>* 1.58 min [method D lipoll]; HRMS [M+Na<sup>+</sup>] calcd for C<sub>15</sub>H<sub>26</sub>O<sub>4</sub>Na 293.1723 found 293.1726; Found: C, 66.59 H, 9.59%; C<sub>15</sub>H<sub>26</sub>O<sub>4</sub> requires: C, 66.64; H, 9.69%.

#### (1R,2R,7S,8S)-14,14-dimethyl-10,15-dioxatricyclo[6.6.1.0<sup>(2,7)</sup>]pentadecan-11-one **65**

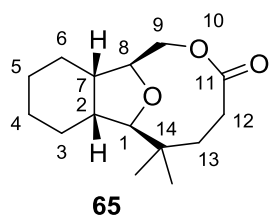

2-Methyl-6-nitrobenzoic anhydride (87 mg, 0.253 mmol) and DMAP (61 mg, 0.506 mmol) was dissolved in CH<sub>2</sub>Cl<sub>2</sub> (90 mL). A solution of 4-[(1R,3S,3aS,7aR)-3-(hydroxymethyl)octahydro-2-benzofuran-1-yl]-4-methylpentanoic acid **64** (57 mg, 0.211 mmol) in CH<sub>2</sub>Cl<sub>2</sub> (20 mL, 0.01 M) was added by syringe pump over 16 h at RT. Approximately 50% of the solvent was removed *in vacuo* and the remaining solution was washed with ice cold sat. aqueous NaHCO<sub>3</sub>. The aqueous layer was extracted with CH<sub>2</sub>Cl<sub>2</sub> (2 x 30 mL), and the combined organic layers were washed with brine (30 mL). The organic layer was dried with MgSO<sub>4</sub> and the solvents were removed *in vacuo*. The crude residue was purified by column chromatography on silica gel (5% MeOH:CH<sub>2</sub>Cl<sub>2</sub>) to yield the product as a white crystalline solid (18 mg, 30%). mp (56.6-57.1 °C); [ $\alpha$ ]<sup>22</sup><sub>D</sub> +14.0 (c=2.0 CHCl<sub>3</sub>); IR (film) 2923, 2860, 1730, 1447 cm<sup>-1</sup>; <sup>1</sup>H NMR (500 MHz, CDCl<sub>3</sub>)  $\delta$  5.12 (1H, dd, J=4.0, 11.5, Ha-9), 3.90 (1H, dd, J=4.0, 8.0, H-8), 3.70 (1H, d, J=11.5, Hb-9), 3.50 (1H, d, J=3.0, H-1), 2.55-2.48

(1H, m, H-7), 2.48-2.44 (2H, m, H-12), 2.27-2.20 (1H, m, H-2), 2.05 (1H, ddd, J=6.5, 10.5, 15.0, Ha-13), 1.69-1.60 (3H, m, CH<sub>2</sub>), 1.62-1.47 (2H, m, CH<sub>2</sub>), 1.40-1.09 (4H, m, CH<sub>2</sub>), 1.09 (3H, s, Me), 0.86 (3H, s, Me); <sup>13</sup>C NMR (125 MHz, CDCl<sub>3</sub>) δ 175.7 (C11), 95.7 (C1), 79.5 (C8), 65.4 (C9), 39.0 (C2 or C7), 38.8 (C2 or C7), 37.3 (C14), 33.9 (C12), 32.5 (C13), 30.1 (CH<sub>2</sub>), 29.1 (Me), 25.4 (Me), 24.3 (CH<sub>2</sub>), 24.0 (CH<sub>2</sub>), 22.1 (CH<sub>2</sub>); LC-MS (ESI<sup>+</sup>) *m/z* 253 [M+H<sup>+</sup>], R<sub>t</sub> 1.63 min [method D]; HRMS [M+H<sup>+</sup>] calcd for C<sub>15</sub>H<sub>25</sub>O<sub>3</sub> 253.1798 found 253.1799; Found: C, 71.45%; H, 9.42%; C<sub>15</sub>H<sub>24</sub>O<sub>3</sub> requires: C, 71.39%; H, 9.59%.

### 2-[(1R,3S,3aS,7aR)-3-[[*tert*-butyldiphenylsilyl]oxy]methyl]-octahydro-2-benzofuran-1-yl]-2-methylpropanal **66**

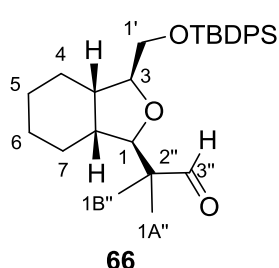

(3S,3aS,7aR)-3-[[*tert*-Butyldiphenylsilyl]oxy]methyl]-octahydro-2-benzofuran-1-ol **23** (841 mg, 2.05 mmol) was dissolved in CH<sub>2</sub>Cl<sub>2</sub> (20 mL) and cooled to -78 °C. BF<sub>3</sub>·OEt<sub>2</sub> (0.78 mL, 6.15 mmol) was added and the solution was stirred for 5 min. Trimethyl(2-methylprop-1-enyloxy)silane (0.41 mL, 2.25 mmol) was then added and the reaction was warmed to RT and stirred for 3 h. The reaction was diluted with CH<sub>2</sub>Cl<sub>2</sub> (20 mL), and washed with H<sub>2</sub>O (2 x 50 mL), followed by brine (50 mL). The organic layer was dried with MgSO<sub>4</sub>. Solvent was removed *in vacuo* to yield **66** as a pale brown oil (950 mg, >98%). This compound was found to be unstable so was used immediately. <sup>1</sup>H NMR (500 MHz, CDCl<sub>3</sub>) δ 9.63 (1H, s, H-3''), 7.75-7.64 (4H, m, Ph), 7.46-4.36 (6H, m, Ph), 3.96-3.89 (1H, m, H-3), 3.79-3.75 (2H, m, Ha-1', H-1), 3.65 (1H, dd, J=5.0, 11.5, Hb-1'), 2.06-2.01 (2H, m, H-3a, H-7a), 1.70-1.56 (4H, 4 x CH<sub>2</sub>), 1.49-1.37 (2H, m, 2 x CH<sub>2</sub>), 1.37-1.21 (2H, m, 2 x CH<sub>2</sub>), 1.07 (3H, s, Me), 1.06 (9H, s, tBu), 1.06 (3H, s, Me); <sup>13</sup>C NMR (125 MHz, CDCl<sub>3</sub>) δ 206.1 (C3'') 135.7 (2 x Ph), 135.6 (2 x Ph), 133.6 (iPh), 133.4 (iPh), 129.6 (Ph), 129.6 (Ph), 127.7 (4 x Ph), 88.3 (C1), 80.9 (C3), 64.9 (C1'), 49.9 (C2''), 39.0 (C3a or C7a), 38.6 (C3a or C7a), 29.4 (CH<sub>2</sub>), 26.8 (tBu), 24.2 (CH<sub>2</sub>), 24.0 (CH<sub>2</sub>), 22.2 (CH<sub>2</sub>), 19.2 (Me) 18.8 (C-Si), 17.6 (Me); LC-MS (ESI<sup>+</sup>) *m/z* 487 [M+Na<sup>+</sup>], R<sub>t</sub> 1.92 min [method E]; HRMS [M+Na<sup>+</sup>] calcd for C<sub>29</sub>H<sub>40</sub>O<sub>3</sub>SiNa 487.2644 found 487.2639.

### [[1S,3R,3aR,7aS)-3-(2-methyl-1-oxopropan-2-yl)octahydro-2-benzofuran-1-yl]methyl 2-bromoacetate **68**

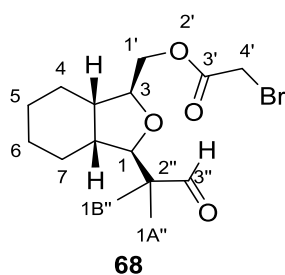

2-[(1R,3S,3aS,7aR)-3-[[*tert*-Butyldiphenylsilyl]oxy]methyl]-octahydro-2-benzofuran-1-yl]-2-methylpropanal **66** (950 mg, 2.05 mmol) was dissolved in THF (20 mL). TBAF (1.0 M in THF, 6.2 mL, 6.2 mmol) was added and the reaction stirred at RT for 8 h. The solution was diluted with Et<sub>2</sub>O (30 mL) and washed with H<sub>2</sub>O (2 x 30 mL) and



the organic layer was dried with MgSO<sub>4</sub>. The product was purified by column chromatography on silica gel (33% EtOAc:hexane) to yield the alcohol **67** as a clear oil (200 mg, 43%). This unstable product was taken immediately into the next step. The alcohol **67** (200 mg, 0.89 mmol) was dissolved in CH<sub>2</sub>Cl<sub>2</sub> (9 mL) and Et<sub>3</sub>N (257 μL, 1.78 mmol) was added. 2-Bromoacetyl bromide (154 μL, 1.78 mmol) was added and the solution was stirred at RT for 5 h. The solution was diluted with CH<sub>2</sub>Cl<sub>2</sub> (20 mL), washed with H<sub>2</sub>O (10 mL), brine (10 mL) and then the aqueous layers were extracted with CH<sub>2</sub>Cl<sub>2</sub> (2 x 10 mL). The organic layer was dried with MgSO<sub>4</sub>. The solvents were removed in vacuo and the crude mixture was flushed through silica (4 cm x Ø 20 mm) with (33% EtOAc:hexane) to yield **68** as a pale brown oil (250 mg, 34% over 2 steps). This compound was unstable so limited characterisation was possible. <sup>1</sup>H NMR (500 MHz, CDCl<sub>3</sub>) δ 9.61 (1H, s, H-3''), 4.31 (1H, dd, J=3.0, 11.5, Ha-1'), 4.17-4.10 (1H, m, Hb-1'), 4.04 (1H, ddd, J=3.0, 6.0, 9.0, H-3), 3.88 (2H, s, H-4'), 3.81 (1H, d, J=4.0, H-1), 2.14-2.08 (1H, m, H-7a), 1.96-1.89 (1H, m, H-3a), 1.75-1.58 (4H, m, 2 x CH<sub>2</sub>), 1.46-1.25 (4H, m, 2x CH<sub>2</sub>), 1.08 (3H, s, Me), 1.07 (3H, s, Me); <sup>13</sup>C NMR (125 MHz, CDCl<sub>3</sub>) δ 205.7 (C3''), 166.7 (C3'), 88.3 (C1), 77.4 (C3), 66.5 (C1'), 49.3 (C2''), 38.6 (C7a or C3a), 38.4 (C7a or C3a), 28.7 (CH<sub>2</sub>), 25.1 (C4'), 23.5 (CH<sub>2</sub>), 23.4 (CH<sub>2</sub>), 21.3 (CH<sub>2</sub>), 18.3 (C1A''), 17.3 (C1B''); LC-MS (ESI<sup>+</sup>) *m/z* 369 [M+Na<sup>+</sup>], R<sub>t</sub> 2.25 min [method D].

**(1R,2R,7S,8S,13R)-13-hydroxy-14,14-dimethyl-10,15-dioxatricyclo[6.6.1.0<sup>(2,7)</sup>]pentadecan-11-one **69****

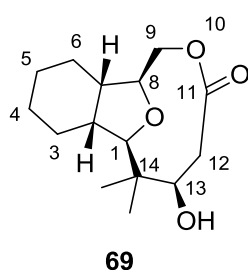

[(1S,3R,3aR,7aS)-3-(2-Methyl-1-oxopropan-2-yl)octahydro-2-benzofuran-1-yl]methyl 2-bromoacetate **68** (240 mg, 0.581 mmol) was dissolved in THF (200 mL), and Sml<sub>2</sub> (0.1 M in THF) was added dropwise (~25 mL) until the colour change of the Sml<sub>2</sub> from blue to yellow on addition slowed and the reaction mixture remained green. The solution was then diluted with Et<sub>2</sub>O (20 mL), and washed with H<sub>2</sub>O (20 mL) and brine (20 mL). The organic layer was dried with MgSO<sub>4</sub>. The

crude yellow oil was purified by column chromatography on silica gel (5% MeOH:CH<sub>2</sub>Cl<sub>2</sub>) to yield **69** as a white crystalline solid (70 mg, 45%). mp (107.8-108.3 °C); [α]<sup>21</sup><sub>D</sub> +14.3 (c=2.0 CHCl<sub>3</sub>); IR (film) 3518, 1724, 1448 cm<sup>-1</sup>; <sup>1</sup>H NMR (500 MHz, CDCl<sub>3</sub>) δ 5.41 (1H, dd, J=4.0, 11.0, H-9A), 3.93 (1H, dd, J=4.0, 8.0, H-8), 3.82-3.78 (1H, m, H-13), 3.74 (1H, d, J=11.0, H-9B), 3.62 (1H, d, J=1.5, H-1), 2.86-2.77 (2H, m, H-12), 2.49-2.43 (3H, m, H-2, H-7, OH), 1.72-1.60 (3H, m, CH<sub>2</sub>), 1.57-1.49 (2H, m, CH<sub>2</sub>), 1.38-1.24 (3H, m, CH<sub>2</sub>), 1.08 (3H, s, CH<sub>3</sub>), 1.01 (3H, s, CH<sub>3</sub>); <sup>13</sup>C NMR (125 MHz, CDCl<sub>3</sub>) δ 172.2 (C11), 94.7 (C1), 78.1 (C8), 75.4 (C13), 65.6 (C9), 41.9 (C14), 40.8 (C12), 38.8 (C2 or C7), 38.7 (C2 or C7), 30.1 (CH<sub>2</sub>), 26.2 (Me), 23.6 (CH<sub>2</sub>), 23.4 (CH<sub>2</sub>), 23.1 (Me), 21.2 (CH<sub>2</sub>); LC-MS (ESI<sup>+</sup>) *m/z* 269 [M+H<sup>+</sup>], R<sub>t</sub> 1.28 min [method E]; HRMS [M+Na<sup>+</sup>] calcd for C<sub>15</sub>H<sub>24</sub>O<sub>4</sub>Na 291.1566 found 291.1572; Found: C, 67.26; H, 9.01%; C<sub>15</sub>H<sub>24</sub>O<sub>4</sub> requires: C, 67.14; H, 9.01%.

**(1R,2R,7S,8S,13R)-14,14-dimethyl-11-oxo-10,15-dioxatricyclo[6.6.1.0<sup>(2,7)</sup>]pentadecan-13-yl acetate **70****

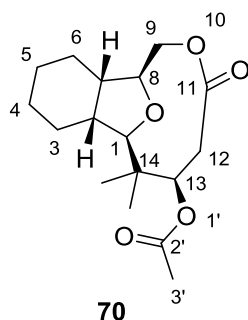

(1R,2R,7S,8S,13R)-13-Hydroxy-14,14-dimethyl-10,15-dioxatricyclo[6.6.1.0<sup>(2,7)</sup>]pentadecan-11-one **69** (8 mg, 0.030 mmol) was dissolved in CH<sub>2</sub>Cl<sub>2</sub> (1.0 mL) and Et<sub>3</sub>N (8.3 μL, 0.060 mmol) was added. Acetic anhydride (6.6 μL, 0.070 mmol) was added and the reaction mixture was stirred for 18 h. The solution was diluted with CH<sub>2</sub>Cl<sub>2</sub> (5 mL) and washed with H<sub>2</sub>O (10 mL x 2). The combined aqueous layers were extracted in CH<sub>2</sub>Cl<sub>2</sub> (10 mL) and the combined organic layers dried over MgSO<sub>4</sub>. Solvent was removed *in vacuo* to yield **70** as a clear oil (9 mg, quant.). [α]<sub>D</sub><sup>24</sup> +42.3 (c=0.1 CHCl<sub>3</sub>); IR (film) 2921, 2852, 1735, 1450 cm<sup>-1</sup>; <sup>1</sup>H NMR (500 MHz, CDCl<sub>3</sub>) δ 5.18 (1H, dd, J=4.0, 11.0, Ha-9), 4.95 (1H, dd, J=4.5, 4.5, H-13), 3.96 (1H, dd, J=4.0, 9.0, H-8), 3.74 (1H, d, J=11.5, Hb-9), 3.58 (1H, d, J=1.5, H-1), 2.83 (1H, obs dd, J=4.5, 15.0, Ha-12), 2.82-2.76 (1H, m, H-7), 2.68 (1H, dd, J=4.5, 15.0, Hb-12), 2.39-2.32 (1H, m, H-2), 2.11 (3H, s, H-3'), 1.72-1.50 (5H, m, CH<sub>2</sub>), 1.37-1.21 (3H, m, CH<sub>2</sub>), 1.07 (3H, s, Me), 0.98 (3H, s, Me); <sup>13</sup>C NMR (125 MHz, CDCl<sub>3</sub>) δ 172.4 (C11), 169.9 (C2'), 95.2 (C1), 78.9 (C8), 76.1 (C13), 65.9 (C9), 41.6 (C14), 39.8 (C2), 38.7 (C12), 37.4 (C7), 30.9 (CH<sub>2</sub>), 25.9 (Me), 24.4 (CH<sub>2</sub>), 24.4 (Me), 23.7 (CH<sub>2</sub>), 21.7 (CH<sub>2</sub>), 21.0 (C3'); LC-MS (ESI<sup>+</sup>) *m/z* 311 [M+Na<sup>+</sup>], R<sub>t</sub> 1.57 min [method D]; HRMS [M+Na<sup>+</sup>] calcd for C<sub>17</sub>H<sub>26</sub>O<sub>5</sub>Na 333.1673 found 333.1691.

**(1S,3S,3aR,7aS)-3-(Prop-2-en-1-yl)-octahydro-2-benzofuran-1-carbaldehyde **71****

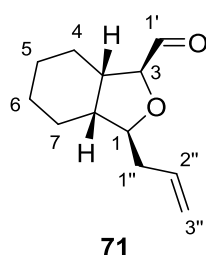

[(1S,3S,3aR,7aS)-3-(Prop-2-en-1-yl)-octahydro-2-benzofuran-1-yl]methanol **25** (146 mg, 0.753 mmol) was dissolved in CH<sub>2</sub>Cl<sub>2</sub> (3 mL). Dess Martin reagent (3.0 mL, 0.3 M in CH<sub>2</sub>Cl<sub>2</sub>, 0.90 mmol) was added and the reaction was stirred at RT for 3 h. An aqueous quenching solution (10 mL, 1.0 g NaHCO<sub>3</sub> and 13 g Na<sub>2</sub>S<sub>2</sub>O<sub>3</sub> in 100 mL H<sub>2</sub>O) was added and the mixture was stirred for 3 h. The organic layer was separated and washed with the quenching solution (5 mL), dried over MgSO<sub>4</sub> and flushed through silica gel (CH<sub>2</sub>Cl<sub>2</sub>). The solvent was removed *in vacuo* to yield **71** as a clear oil (146 mg, 100%). This compound was unstable so limited characterisation was possible and the compound was used immediately. <sup>1</sup>H NMR (500 MHz, CDCl<sub>3</sub>) δ 9.69 (1H, d, J=2.0, H-1'), 5.90 (1H, dddd, J=7.0, 7.0, 10.0, 17.0, H-2''), 5.20-5.06 (2H, m, H-3''), 4.09-3.99 (2H, m, H-1, H-3), 2.45-2.25 (3H, m, H-1'', H-7a or H-3a), 1.98-1.90 (1H, m, H-7a or H-3a), 1.81-1.32 (8H, m, CH<sub>2</sub>); <sup>13</sup>C NMR (125 MHz, CDCl<sub>3</sub>) δ 203.2 (C1'), 134.2 (C2''), 116.8 (C3''), 85.7 (C1 or C3), 82.8 (C1 or C3), 41.6 (C3a or C7a), 39.7 (C3a or C7a), 39.2 (C1''), 25.2 (CH<sub>2</sub>), 24.9 (CH<sub>2</sub>), 22.5 (CH<sub>2</sub>), 22.2 (CH<sub>2</sub>).

**(R)-1-((1S,3S,3aR,7aS)-3-allyl-1-methyloctahydroisobenzofuran-1-yl)pent-4-en-1-ol **72** and (S)-1-((1S,3S,3aR,7aS)-3-allyl-1-methyloctahydroisobenzofuran-1-yl)pent-4-en-1-ol **73****

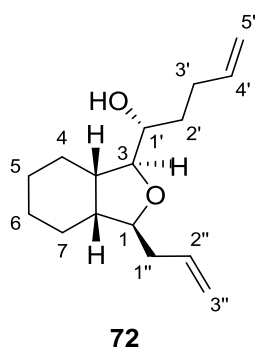

**72**

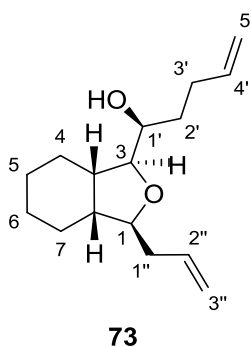

**73**

A solution of (1S,3S,3aR,7aS)-3-(Prop-2-en-1-yl)-octahydro-2-benzofuran-1-carbaldehyde **71** (160 mg, 0.824 mmol) in THF (8.2 mL) was added dropwise by syringe to a freshly prepared solution of but-3-enylmagnesium bromide (0.9 mL, 4.0 M in Et<sub>2</sub>O) at 0 °C under nitrogen. The reaction was warmed to RT, quenched with sat. aqueous NH<sub>4</sub>Cl (30 mL) and

extracted with Et<sub>2</sub>O (3 × 20 mL). The combined organic layers were dried over NaSO<sub>4</sub> and the solvents were removed *in vacuo*. The crude residue was purified by column chromatography (20% ethyl acetate in hexane) to give major isomer **72** (106 mg, 51%) and minor isomer **73** (59 mg, 29%) as clear oils. Major isomer [α]<sup>24.6</sup><sub>D</sub> -35.1 (c=0.1 CHCl<sub>3</sub>); IR (film) 3408, 2925, 2856, 1640 cm<sup>-1</sup>; <sup>1</sup>H NMR (500 MHz, CDCl<sub>3</sub>) δ 5.94-5.77 (2H, m, H-2'', H-4'), 5.22-4.96 (4H, m, H-3'', H-5'), 3.88 (1H, ddd, J=4.5, 7.0, 7.0, H-1), 3.70-3.62 (2H, m, H-1', H-3), 2.40-2.10 (5H, m, H-3', H-1'', H-3a), 2.00-1.88 (2H, m, H-7a, OH), 1.69-1.27 (10H, m, CH<sub>2</sub>); <sup>13</sup>C NMR (125 MHz, CDCl<sub>3</sub>) δ 138.6 (C4' or C2''), 135.2 (C4' or C2''), 117.3 (C3'' or C5'), 115.0 (C3'' or C5'), 86.3 (C3), 80.6 (C1), 72.6 (C1'), 42.5 (C7a), 39.1 (C1'' or C3'), 37.7 (C3a), 31.9 (CH<sub>2</sub>), 30.5 (C1'' or C3'), 28.0 (CH<sub>2</sub>), 25.3 (CH<sub>2</sub>), 23.8 (CH<sub>2</sub>), 22.8 (CH<sub>2</sub>); LC-MS (ESI<sup>+</sup>) *m/z* 273 [M+Na<sup>+</sup>], R<sub>t</sub> 1.45 min [method D]; HRMS [M+H<sup>+</sup>] calcd for C<sub>16</sub>H<sub>27</sub>O<sub>2</sub> 251.2006 found 251.2013. Minor Isomer- <sup>1</sup>H NMR (500 MHz, CDCl<sub>3</sub>) δ 5.90-5.77 (m, 2H, H-2'', H-4'), 5.14-4.93 (m, 4H, H-3'', H-5'), 3.89 (ddd, J = 7.0, 6.0, 5.2 Hz, 1H, H-1), 3.56 (t, J = 5.4 Hz, 1H, H-3), 3.35 (dq, J = 8.1, 5.2 Hz, 1H, H-1'), 2.38-2.05 (m, 6H, H-1'', H-3', H-3a, OH), 1.98-1.89 (m, 1H, H-7a), 1.69-1.30 (m, 10H); <sup>13</sup>C NMR (126 MHz, CDCl<sub>3</sub>) δ 138.7 (C4' or C2''), 135.2 (C4' or C2''), 117.3 (C5' or C3''), 114.8 (C5' or C3''), 85.4 (C3), 81.5 (C1), 71.8 (C1'), 42.2 (C7a), 40.0 (C1'' or C3'), 39.0 (C3a), 34.0 (CH<sub>2</sub>), 30.2 (C1'' or C3'), 26.5 (CH<sub>2</sub>), 25.9 (CH<sub>2</sub>), 23.4 (CH<sub>2</sub>), 23.2 (CH<sub>2</sub>); LC-MS (ESI<sup>+</sup>) *m/z* 273 [M+Na<sup>+</sup>], R<sub>t</sub> 1.53 min [method D]; HRMS [M+H<sup>+</sup>] calcd for C<sub>16</sub>H<sub>27</sub>O<sub>2</sub> 251.2006 found 251.2003.

**((R)-1-((1S,3S,3aR,7aS)-3-allyl-1-methyloctahydroisobenzofuran-1-yl)pent-4-en-1-yl)oxy)(tert-butyl)dimethylsilane **74****

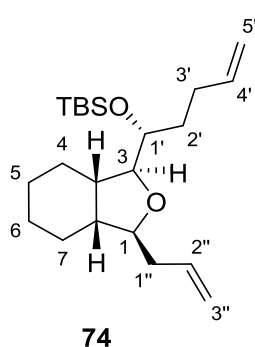

**74**

1-[(1S,3S,3aR,7aS)-3-(Prop-2-en-1-yl)-octahydro-2-benzofuran-1-yl]pent-4-en-1-ol **72** (70 mg, 0.283 mmol) was dissolved in CH<sub>2</sub>Cl<sub>2</sub> (2.8 mL) and DIPEA (195 μL, 1.12 mmol) was added. TBSOTf (117 μL, 0.67 mmol) was added and the reaction was stirred at RT for 30 min. The reaction was quenched with sat. aqueous NH<sub>4</sub>Cl (10 mL) and extracted in CH<sub>2</sub>Cl<sub>2</sub> (3 × 10 mL). The combined organic layers were dried over

MgSO<sub>4</sub> and the solvent was removed *in vacuo* to yield **74** as a clear oil (102 mg, 100%). [ $\alpha$ ]<sup>24.3</sup><sub>D</sub> -33.5 (c=0.25 CHCl<sub>3</sub>); IR (film) 3407, 2927, 2857, 1463 cm<sup>-1</sup>; <sup>1</sup>H NMR (500 MHz, CDCl<sub>3</sub>)  $\delta$  5.95-5.81 (2H, m, H-2'', H-4'), 5.14-4.92 (4H, m, H-5', H-3''), 3.87-3.85 (1H, m, H-1), 3.58-3.52 (2H, m, H-3, H-1'), 2.37-2.24 (1H, m, Ha-1''), 2.20-2.12 (2H, m, Hb-1'', H-3a or H-7a), 1.94-1.84 (1H, m, H-3a or H-7a), 1.74-1.26 (12H, m, CH<sub>2</sub>), 0.91 (9H, s, <sup>t</sup>Bu), 0.08 (6H, s, Si-CH<sub>3</sub>); <sup>13</sup>C NMR (125 MHz, CDCl<sub>3</sub>)  $\delta$  139.2 (C2'' or C4'), 135.7 (C2'' or C4'), 116.5 (C3'' or C5'), 114.1 (C3'' or C5'), 85.8 (C3), 80.2 (C1), 73.6 (C1'), 41.6 (C3a or C7a), 39.7 (C3a or C7a), 39.6 (C1''), 33.4 (CH<sub>2</sub>), 28.6 (CH<sub>2</sub>), 28.2 (CH<sub>2</sub>), 26.0 (<sup>t</sup>Bu), 24.7 (CH<sub>2</sub>), 24.3 (CH<sub>2</sub>), 22.3 (CH<sub>2</sub>), 18.1 (Si-C), -4.0 (Si-Me), -4.3 (Si-Me); HRMS [M+H<sup>+</sup>] calcd for C<sub>22</sub>H<sub>41</sub>O<sub>2</sub>Si 365.2870 found 365.2875.

**tert-butyl(((4a*S*,5*S*,6*R*,12*S*,12a*R*,*Z*)-5,12-dimethyl-1,2,3,4,4a,5,6,7,8,11,12,12a-dodecahydro-5,12-epoxybenzo[10]annulen-6-yl)oxy)dimethylsilane **75****

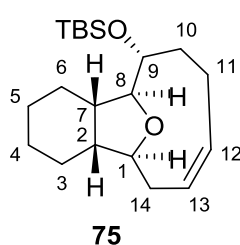

({1-[(1*S*,3*S*,3a*R*,7a*S*)-3-(Prop-2-en-1-yl)-octahydro-2-benzofuran-1-yl]pent-4-en-1-yl)oxy)(*tert*-butyl)dimethylsilane **74** (42 mg, 0.115 mmol) was dissolved in CH<sub>2</sub>Cl<sub>2</sub> (230 mL) and Grubbs II catalyst (9.7 mg, 0.01 mmol) was added. The solution was stirred at RT for 16 h. DMSO (10  $\mu$ L) was added and the solution was stirred for 24 h, before pre-absorbing on to silica (~200 mg). The product was purified by column chromatography to yield **75** as a clear oil (36 mg, 97%). [ $\alpha$ ]<sup>24.6</sup><sub>D</sub> -31.1 (c=0.75 CHCl<sub>3</sub>); IR (film) 2930, 2857 cm<sup>-1</sup>; <sup>1</sup>H NMR (Acetone-*d*<sub>6</sub>, 500 MHz)  $\delta$  5.75 (1H, tdd, *J*=11.6, 5.6, 2.0 Hz, H-12), 5.62 (1H, ddd, *J*=11.0, 8.7, 6.3 Hz, H-13), 4.09 (1H, dt, *J*=9.9, 3.1 Hz, H-1), 3.45 (1H, ddd, *J*=9.6, 8.8, 4.9 Hz, H-9), 3.28 (1H, d, *J*=8.8 Hz, H-8), 3.01 (1H, qd, *J*=11.7, 8.7 Hz, H-11a), 2.56 (1H, ddt, *J*=14.6, 6.3, 3.1, 2.0 Hz, H-14a), 2.18 (1H, dtd, *J*=10.3, 6.0, 4.8, 1.7 Hz, H-2), 2.07 (2H, ddd, *J*=14.8, 8.7, 2.7 Hz, H-14b), 1.96 (1H, dt, *J*=11.6, 5.9 Hz, H-7), 1.92 (1H, ddt, *J*=11.6, 4.8, 2.5, 1.2 Hz, H-11b), 1.73 – 1.66 (3H, m, H-5a, H-10), 1.66 – 1.54 (3H, m, H-6a, H-3), 1.54 – 1.48 (1H, m, H-4a), 1.40 – 1.29 (1H, m, H-4b), 1.29 – 1.14 (2H, m, H-5b, H-6b), 0.89 (9H, s, <sup>t</sup>Bu), 0.08 (3H, s, Si-Me), 0.06 (3H, s, Si-Me); <sup>13</sup>C NMR (126 MHz, Acetone)  $\delta$  133.2 (C12), 125.5 (C13), 89.9 (C9), 79.5 (C1), 72.1 (C8), 42.8 (C7), 36.4 (C2), 33.6 (C10), 28.5 (C14), 27.9 (C6), 25.5 (C11), 25.3 (<sup>t</sup>Bu), 24.9 (C5), 23.5 (C3), 21.1 (4), 17.6 (<sup>t</sup>Bu), -4.4 (Si-Me), -5.2 (Si-Me); LC-MS (ESI<sup>+</sup>) *m/z* 359 [M+Na<sup>+</sup>], R<sub>t</sub> 2.00 min [method E]; HRMS [M+H<sup>+</sup>] calcd for C<sub>20</sub>H<sub>37</sub>O<sub>2</sub>Si 337.2557 found 337.2549

**(4a*S*,5*S*,6*R*,12*S*,12a*R*,*Z*)-5,12-dimethyl-1,2,3,4,4a,5,6,7,8,11,12,12a-dodecahydro-5,12-epoxybenzo[10]annulen-6-ol **76****

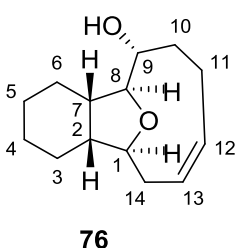

*tert*-Butyldimethyl[(1*S*,2*R*,7*S*,8*S*,12*Z*)-15-oxatricyclo[6.6.1.0<sup>[2,7]</sup>]pentadec-12-en-9-yl]oxy)silane **75** (42 mg, 0.113 mmol), was dissolved in 1M HCl:EtOH:Et<sub>2</sub>O (5 mL, 0.05:1:1) and stirred

at RT for 3 h. The solution was then basified with sat. aqueous NaHCO<sub>3</sub> (dropwise to neutral pH) and extracted into Et<sub>2</sub>O (3 × 10 mL). The combined organic layers were washed in brine (10 mL) and dried over MgSO<sub>4</sub>. The solvents were removed *in vacuo* to yield **76** as white crystals (14 mg, 55%). mp (102.3-103.2 °C); [ $\alpha$ ]<sup>22</sup><sub>D</sub> +23.0 (c=0.1 CHCl<sub>3</sub>); IR (film) 3014, 2923, 2851, 1449 cm<sup>-1</sup>; <sup>1</sup>H NMR (500 MHz, CDCl<sub>3</sub>)  $\delta$  5.73 (1H, dddd, J=2.5, 5.5, 11.0, 12.0, H-12), 5.59 (1H, ddd, J=6.5, 8.5, 11.0, H-13), 4.12 (1H, ddd, H-1), 3.40-3.35 (2H, m, H-8, H-9), 2.98 (1H, dddd, J=7.5, 12.0, 12.0, 12.0, Ha-11), 2.67-2.62 (1H, m, Ha-14), 2.20-2.16 (1H, m, H-2), 2.05-1.97 (3H, m, H-7, Hb-11, Hb-14), 1.82-1.75 (2H, m, H-10), 1.74-1.66 (2H, m, CH<sub>2</sub>), 1.62-1.49 (3H, m, CH<sub>2</sub>), 1.36-1.15 (3H, m, CH<sub>2</sub>); <sup>13</sup>C NMR (125 MHz, CDCl<sub>3</sub>)  $\delta$  133.6 (C12), 125.5 (C13), 89.7 (C8), 80.0 (C1), 71.6 (C9), 42.9 (C7), 36.7 (C2), 33.9 (C10), 28.8 (C14), 27.8 (CH<sub>2</sub>), 25.4 (C11), 24.9 (CH<sub>2</sub>), 23.9 (C3), 21.4 (CH<sub>2</sub>); LC-MS (ESI<sup>+</sup>) *m/z* 245 [M+Na<sup>+</sup>], R<sub>t</sub> 1.47 min [method E]; HRMS [M+H<sup>+</sup>] calcd for C<sub>14</sub>H<sub>23</sub>O<sub>2</sub> 223.1693 found 223.1695.

**((1R,2S,3S,5S,6R,7S)-5-Allyl-4-oxatricyclo[5.2.1.0<sup>2,6</sup>]dec-8-en-3-yl)-methanol **79****

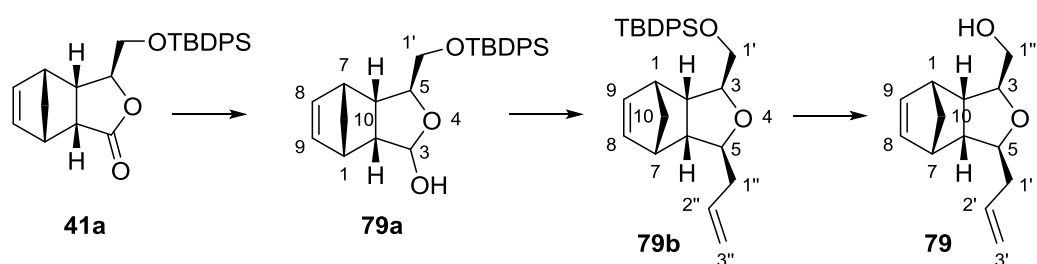

(1*S*,2*R*,5*S*,6*S*,7*R*)-5-(*tert*-Butyldiphenylsilyloxymethyl)-4-oxatricyclo[5.2.1.0<sup>2,6</sup>]dec-8-en-3-one **41a** (292 mg, 0.699 mmol) was dissolved in anhydrous CH<sub>2</sub>Cl<sub>2</sub> (1.9 mL) and cooled to -78 °C under N<sub>2</sub>. DIBAL-H (1.0 M in toluene, 0.77 mL, 0.77 mmol) was added dropwise. The reaction was stirred at 78 °C for 100 min then quenched with EtOAc (10 mL). The solution was warmed to RT and a sat. aq. solution of Rochelles salt (6 mL) was added and the mixture was stirred for 3 h. The aqueous layer was separated and extracted with CH<sub>2</sub>Cl<sub>2</sub> (3 x 20 mL). The organic layers were combined, dried over MgSO<sub>4</sub> and the solvent was removed *in vacuo* to yield **79a** as a clear oil (286 mg, 98%). [ $\alpha$ ]<sup>24</sup><sub>D</sub> +2.8 (c=0.34 CH<sub>2</sub>Cl<sub>2</sub>); IR (film) 3423, 2931, 2858, 1428 cm<sup>-1</sup>; <sup>1</sup>H NMR (500 MHz, CDCl<sub>3</sub>)  $\delta$  7.73-7.67 (4H, m, Ph), 7.49-7.41 (6H, m, Ph), 6.19-6.17 (2H, m, H-8, H-9), 4.87 (1H, d, J=9.5, H-3), 3.99 (1H, d, J=9.5, OH), 3.76 (1H, dd, J=3.0, 11.0, Ha-1'), 3.67-3.65 (1H, m, H-5), 3.55 (1H, dd, J=3.0, 11.0, Hb-1'), 3.08-3.05 (1H, m, H-7), 2.92-2.89 (1H, m, H-1), 2.88-2.84 (2H, m, H-2, 6), 1.48 (1H, d, J=8.0, Ha-10), 1.35 (1H, d, J=8.0, Hb-10), 1.09 (9H, s, <sup>t</sup>Bu); <sup>13</sup>C NMR (125 MHz, CDCl<sub>3</sub>)  $\delta$  135.8 (2 x Ph), 135.7 (2 x Ph), 135.6 (Ph), 134.9 (C9), 134.6 (C8), 132.5 (Ph), 132.4 (Ph), 130.1 (Ph), 129.9 (Ph), 129.4 (Ph), 127.9 (Ph), 127.7 (Ph), 101.3 (C3), 83.6 (C5), 67.6 (C1'), 58.1 (C1), 51.6 (C10), 48.3 (C6), 46.0 (C2), 45.2 (C7), 27.0 (<sup>t</sup>Bu), 19.2 (Si-C); LC-MS (ESI<sup>+</sup>) *m/z* 443 [M+Na<sup>+</sup>], R<sub>t</sub> 3.22 min, [method C]; HRMS [M+Na<sup>+</sup>] calcd for C<sub>26</sub>H<sub>32</sub>O<sub>3</sub>SiNa 443.2013; found 443.2002.

(1*S*,2*R*,5*S*,6*S*,7*R*)-5-(*tert*-Butyldiphenylsilyloxymethyl)-4-oxatricyclo[5.2.1.0<sup>2,6</sup>]dec-8-en-3-ol **79a** (286 mg, 0.90 mmol) was dissolved in CH<sub>2</sub>Cl<sub>2</sub> (3 mL) and cooled to -78 °C. BF<sub>3</sub>·OEt<sub>2</sub> (0.26 mL, 2.04 mmol) was added by syringe and the solution stirred for 5 min. Allyltrimethylsilane (0.32 mL, 2.04 mmol) was added by syringe and the reaction then warmed to RT over 18 h. The reaction was then quenched with H<sub>2</sub>O (6 mL) and extracted into CH<sub>2</sub>Cl<sub>2</sub> (3 x 6 mL). The combined organic layers were dried over MgSO<sub>4</sub>. The solvent was removed *in vacuo* to yield **79b** as a clear oil (289 mg, 96%). [α]<sup>22</sup><sub>D</sub> 67.7 (c=0.10 CH<sub>2</sub>Cl<sub>2</sub>); IR (film) 2930, 2857, 1471, 1427 cm<sup>-1</sup>; <sup>1</sup>H NMR (500 MHz, CDCl<sub>3</sub>) δ 7.72-7.68 (4H, m, Ph), 7.45-7.39 (6H, m, Ph), 6.22-6.19 (2H, m, H-8, H-9), 5.85 (1H, dddd, *J*=7.0, 7.0, 10.0, 17.0, H-2'), 5.09-5.02 (2 H, m, H-3'), 3.72 (1H, dd, *J*=5.0, 10.0 H-1''), 3.59 (1H, dd, *J*=6.0, 10.0, H-1'), 3.54 (1H, ddd, *J*=6.0, 6.0, 6.0, H-3), 3.48 (1H, ddd, *J*=6.5, 6.0, 6.5, H-5), 2.89 (1H, ddd, *J*=4.0, 6.0, 10.0, H-2), 2.85-2.82 (1H, m, H-1), 2.80-2.78 (1H, m, H-7), 2.66 (1H, ddd, *J*=4.0, 6.0, 10.5, H-6), 2.38-2.32 (1H, m, H-1'), 2.20-2.15 (1H, m, H-1'), 1.71 (1H, dt, *J*=2.0, 8.0, H-10), 1.59-1.56 (1H, m, H-10), 1.09 (9H, s, <sup>t</sup>Bu); <sup>13</sup>C NMR (125 MHz, CDCl<sub>3</sub>) δ 136.7 (C9), 136.6 (C8), 135.7 (4 x Ph), 135.1 (C1'), 133.8 (<sup>i</sup>Ph), 133.7 (<sup>i</sup>Ph), 129.6 (Ph), 129.6 (Ph), 127.6 (4 x Ph), 116.6 (C3'), 82.1 (C3), 81.5 (C5), 66.9 (C1''), 55.0 (C2), 53.8 (C10), 53.1 (C6), 45.0 (C1), 44.9 (C7), 41.0 (C1'), 26.9 (<sup>t</sup>Bu), 19.3 (Si-C).

((1*R*,2*S*,3*S*,5*S*,6*R*,7*S*)-5-Allyl-4-oxatricyclo[5.2.1.0<sup>2,6</sup>]dec-8-en-3-ylmethoxy)-*tert*-butyldiphenyl silane **79b** (178 mg, 0.403 mmol) was dissolved in THF (2.2 mL). The solution was cooled to 0 °C under N<sub>2</sub> and TBAF (1.20 mL, 1.20 mmol, 1.0 M in THF) was added by syringe. The reaction was stirred for 1 h at 0 °C before quenching with Et<sub>2</sub>O (20 mL). The reaction mixture was washed with H<sub>2</sub>O (3 x 30 mL) and extracted into Et<sub>2</sub>O (2 x 30 mL). The combined organic layers were dried over Na<sub>2</sub>SO<sub>4</sub> and the solvent was removed *in vacuo* to give the crude product. This was purified by column chromatography on silica gel (15% EtOAc:hexane) to yield **79** as a clear oil (49 mg, 59%). [α]<sup>25</sup><sub>D</sub> -5.7 (c=0.51 CH<sub>2</sub>Cl<sub>2</sub>); IR (film) 3420, 2965, 1653, 1558 cm<sup>-1</sup>; <sup>1</sup>H NMR (500 MHz, d<sub>5</sub>-Pyr) δ 6.23-6.11 (2H, m, H-8, H-9), 6.11-6.02 (1H, m, OH), 5.91 (1H, ddt, *J*=7.0, 10.5, 17.0, H-2'), 5.12 (1H, dd, *J*=1.5, 17.0, Ha-3'), 5.09-5.09 (1H, m, Hb-3'), 3.90 (1H, dd, *J*=5.0, 11.0, Ha-1''), 3.84 (1H, dd, *J*=6.0, 11.0, Hb-1''), 3.75 (1H, ddd, *J*=5.5, 6.0, 6.0, H-3), 3.57 (1H, ddd, *J*=6.5, 6.5, 6.5, H-5), 2.93 (1H, ddd, *J*=4.0, 6.5, 10.5, H-2), 2.80-2.75 (1H, m, H-1) 2.70-2.64 (1H, m, H-7), 2.64 (1H, ddd, *J*=4.0, 6.5, 10.0, H-6), 2.43 (1H, m, H-1'), 2.29 (1H, ddd, *J*=7.0, 7.0, 13.5, H-1'), 1.63 (1H, d, *J*=8.0, Ha-10), 1.48 (1H, d, *J*=8.0, Hb-10); <sup>13</sup>C NMR (125 MHz, CDCl<sub>3</sub>) δ 137.6 (C8 or C9), 137.4 (C8 or C9), 136.4 (C2'), 117.1 (C3'), 83.9 (C3), 81.9 (C5), 66.1 (C1''), 56.0 (C2), 54.7 (C10), 53.5 (C6), 45.6 (C1 or C7), 45.5 (C1 or C7), 41.7 (C2'); LC-MS (ESI<sup>+</sup>) *m/z* 229 [M+Na<sup>+</sup>], R<sub>t</sub> 2.12 min [method D]; HRMS [M+H<sup>+</sup>] calcd for C<sub>13</sub>H<sub>19</sub>O<sub>2</sub> 207.1380; found 207.1377.

**((1*R*,2*S*,3*S*,5*S*,6*R*,7*S*)-5-allyl-4-oxa-tricyclo[5.2.1.0<sup>2,6</sup>]dec-8-en-3-ylmethyl but-3-enoate **80****

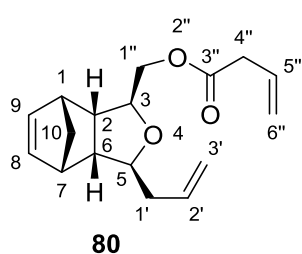

((1*R*,2*S*,3*S*,5*S*,6*R*,7*S*)-5-Allyl-4-oxatricyclo[5.2.1.0<sup>2,6</sup>]dec-8-en-3-yl)methanol **79** (50 mg, 0.243 mmol) was dissolved in CH<sub>2</sub>Cl<sub>2</sub> (0.5

S57

mL). *Trans*-crotonyl chloride (30  $\mu$ L, 0.316 mmol) and triethylamine (105  $\mu$ L, 0.725 mmol) were added and the reaction mixture was stirred at RT for 18 h. The reaction mixture was diluted with  $\text{CH}_2\text{Cl}_2$  (10 mL) and washed with  $\text{H}_2\text{O}$  (10 mL) and brine (10 mL). The aqueous layers were combined and extracted with  $\text{CH}_2\text{Cl}_2$  (10 mL x 2). The combined organic layers were dried with  $\text{MgSO}_4$  and the solvents removed *in vacuo*. The crude reaction mixture was purified by column chromatography on silica gel (20% EtOAc:hexane) to yield **80** as a clear oil (44 mg, 66%).  $[\alpha]_D^{25} -19.0$  ( $c=1.0$   $\text{CHCl}_3$ ); IR (film) 3076, 2968, 1752  $\text{cm}^{-1}$ ;  $^1\text{H}$  NMR (500 MHz,  $\text{CDCl}_3$ )  $\delta$  6.23-6.19 (2H, m, H-9, H-8), 5.93 (1H, tdd,  $J=6.5, 10.0, 17.0$ , H-5''), 5.78 (1H, tdd,  $J=7.0, 10.0, 17.0$ , H-2'), 5.19-5.14 (2H, m, H-6''), 5.11-5.03 (2H, m, H-3'), 4.15 (1H, dd,  $J=4.0, 11.0$ , HA-1''), 4.02 (1H, dd,  $J=7.0, 11.0$ , HB-1''), 3.64 (1H, dd,  $J=6.0, 11.0$ , H-3), 3.51 (1H, dd,  $J=6.0, 12.5$ , H-5), 3.13 (2H, d,  $J=7.0$ , H-4''), 2.84-2.77 (2H, m, H-1, H-7), 2.76-2.67 (2H, m, H-2, H-6), 2.41-2.34 (1H, m, HA-1'), 2.24-2.18 (1H, m, HB-1'), 1.71 (1H, d,  $J=8.0$ , HA-10), 1.56 (1H, d,  $J=8.0$ , HB-10);  $^{13}\text{C}$  NMR (125 MHz,  $\text{CDCl}_3$ )  $\delta$  171.4 (C3''), 136.8 (C8 or C9), 136.3 (C8 or C9), 134.7 (C2'), 130.2 (C5''), 118.6 (C6''), 116.9 (C3'), 81.8 (C5), 79.2 (C3), 67.1 (C1''), 54.9 (C2 or C6), 53.7 (C10), 52.9 (C2 or C6), 44.9 (C1 or C7), 44.5 (C1 or C7), 40.8 (C1'), 38.7 (C4''); LC-MS (ESI<sup>+</sup>)  $m/z$  297 [ $\text{M}+\text{Na}^+$ ],  $R_t$  2.37 min [method D]; HRMS [ $\text{M}+\text{Na}^+$ ] calcd for  $\text{C}_{17}\text{H}_{22}\text{O}_3$  H 275.1643 found 275.1642.

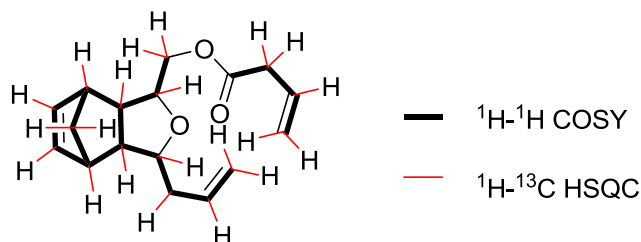

**(1R,2S,3S,5S,6R,7S)-5-Allyl-4-oxatricyclo[5.2.1.0<sup>2,6</sup>]dec-8-en-3-ylmethyl pent-4-enoate **81****

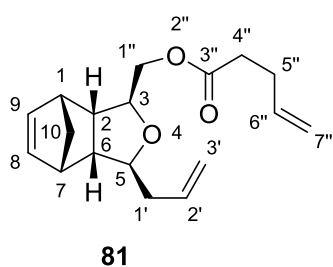

((1R,2S,3S,5S,6R,7S)-5-Allyl-4-oxatricyclo[5.2.1.0<sup>2,6</sup>]dec-8-en-3-yl)-methanol **79** (50 mg, 0.243 mmol) was dissolved in pyridine (1.2 mL). Pent-4-enoyl chloride (35  $\mu$ L, 0.316 mmol) was added and the reaction mixture was stirred at RT for 18 h. The reaction mixture was diluted with  $\text{CH}_2\text{Cl}_2$  (10 mL) and washed with  $\text{H}_2\text{O}$  (10 mL) and brine (10 mL). The aqueous layers were combined and extracted with  $\text{CH}_2\text{Cl}_2$  (10 mL x 2). The combined organic

layers were dried with  $\text{MgSO}_4$  and the solvents removed *in vacuo*. The crude reaction mixture was purified by column chromatography on silica gel (20% EtOAc:hexane) to yield **81** as a clear oil (49 mg, 70%).  $[\alpha]_D^{25} +15.5$  ( $c=2.0$ ,  $\text{CHCl}_3$ ); IR (film) 3075, 2965, 1741  $\text{cm}^{-1}$ ;  $^1\text{H}$  NMR (500 MHz,  $\text{CDCl}_3$ )  $\delta$  6.22-6.21 (2H, m, H-9, H-8), 5.88-5.74 (2H, m, H-2', H-6''), 5.12-4.99 (4H, m, H-3', H-7''), 4.15 (1H, dd,  $J=4.5, 11.5$ , HA-1''), 4.02 (1H, dd,  $J=6.5, 11.5$ , HB-1''), 3.64 (1H, ddd,  $J=6.5, 6.5, 4.5$ , H-3), 3.15 (1H, ddd,  $J=5.5, 5.5, 7.5$ , H-5), 2.83-2.79 (2H, m, H-1, H-7), 2.76-2.69 (2H, m, H-2, H-6), 2.47-2.35 (5H, m, H-4'', H-5'', HA-1'), 2.20 (1H, ddd,  $J=7.5, 7.5,$

14.5, HB-1'), 1.71 (1H, ddd,  $J=1.5, 1.5, 8.5$ , HA-10), 1.57 (1H, br d,  $J=8.5$ , HB-10);  $^{13}\text{C}$  NMR (125 MHz,  $\text{CDCl}_3$ )  $\delta$  172.9 (C3''), 136.9 (C8 or C9), 136.7 (C2' or C6''), 136.4 (C8 or C9), 134.6 (C2' or C6''), 117.0 (C3' or C7''), 115.5 (C3' or C7''), 81.8 (C5), 79.3 (C3), 66.9 (C1''), 54.9 (C2 or C6), 53.9 (C10), 52.7 (C2 or C6), 44.9 (C1 or C7), 44.5 (C1 or C7), 40.8 (C1'), 33.5 (C4'' or C5''), 28.8 (C4'' or C5''); LC-MS (ESI+)  $m/z$  311 [ $\text{M}+\text{Na}^+$ ],  $R_t$  2.43 min [method D]; HRMS [ $\text{M}+\text{H}^+$ ] calcd for  $\text{C}_{18}\text{H}_{24}\text{O}_3$   $H$  289.1798 found 289.1798.

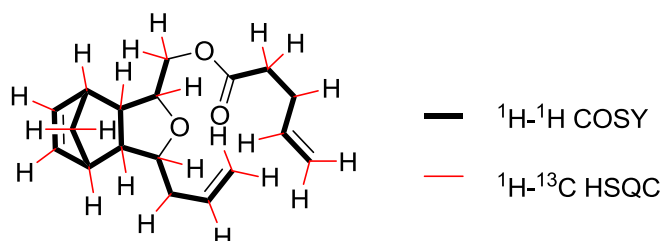

**(1R,2S,3S,5S,6R,7S)-5-allyl-4-oxatricyclo[5.2.1.0<sup>2,6</sup>]dec-8-en-3-ylmethyl hex-5-enoate **82****

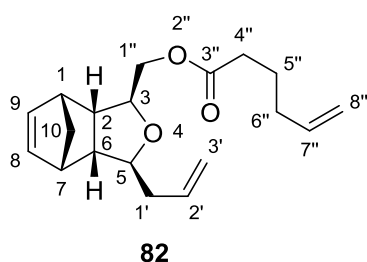

((1R,2S,3S,5S,6R,7S)-5-Allyl-4-oxatricyclo[5.2.1.0<sup>2,6</sup>]dec-8-en-3-yl) methanol **79** (50 mg, 0.243 mmol) was dissolved in pyridine (1.2 mL). Hex-5-enoyl chloride (42 mg, 0.317 mmol) was added and the reaction mixture was stirred at RT for 18 h. The reaction mixture was diluted with  $\text{CH}_2\text{Cl}_2$  (10 mL) and washed with  $\text{H}_2\text{O}$  (10 mL) and brine (10 mL). The aqueous layers were combined and extracted with  $\text{CH}_2\text{Cl}_2$  (10 mL x 2).

The combined organic layers were dried over  $\text{MgSO}_4$  and the solvents removed *in vacuo*. The crude reaction mixture was purified by column chromatography on silica gel (20% EtOAc:hexane) to yield **82** as a clear oil (33 mg, 46%).  $[\alpha]^{25}_{\text{D}} +19.6$  ( $c=1.0$   $\text{CHCl}_3$ ); IR (film) 3075, 2965, 1738  $\text{cm}^{-1}$ ;  $^1\text{H}$  NMR (500 MHz,  $\text{CDCl}_3$ )  $\delta$  6.25-6.22 (2H, m, H-9, H-8), 5.83-5.74 (2H, m, H-2', H-7''), 5.13-5.05 (2H, m, H-3'), 5.06-4.98 (2H, m, H-8''), 4.18 (1H, dd,  $J=4.5, 11.0$ , Ha-1''), 4.02 (1H, dd,  $J=7.0, 11.0$ , Hb-1''), 3.63 (1H, ddd,  $J=4.5, 6.0, 6.5$ , H-3), 3.51 (1H, ddd,  $J=6.0, 7.0, 7.5$ , H-5), 2.84-2.79 (2H, m, H-1, H-7), 2.77-2.69 (2H, m, H-2, H-6), 2.42-2.35 (1H, m, Ha-1'), 2.38 (2H, t,  $J=7.5$ , H-4''), 2.26-2.19 (2H, m, H-1'), 2.14-2.08 (1H, m, H-5''), 1.78-1.12 (3H, m, H-6'', Ha-10), 1.61-1.56 (1H, m, Hb-10),  $^{13}\text{C}$  NMR (125 MHz,  $\text{CDCl}_3$ )  $\delta$  173.5 (C3''), 137.6 (C7''), 136.9 (C8 or C9), 136.3 (C8 or C9), 134.6 (C2'), 116.2 (C3'), 115.3 (C8''), 81.7 (C5), 79.3 (C3), 66.8 (C1''), 54.9 (C2 or C6), 53.8 (C10), 52.7 (C2 or C6), 44.9 (C1 or C7), 44.5 (C1 or C7), 40.8 (C1'), 33.7 (C4''), 33.0 (C5''), 24.0 (C6''); LC-MS (ESI+)  $m/z$  325 [ $\text{M}+\text{Na}^+$ ],  $R_t$  2.48 min [method D]; HRMS [ $\text{M}+\text{H}^+$ ] calcd for  $\text{C}_{19}\text{H}_{27}\text{O}_3$  303.1955 found 303.1940.

**[(1S,3R,3aR,7aS)-3-(2-methyl-3-oxobutan-2-yl)-octahydro-2-benzofuran-1-yl]methyl acetate **89****



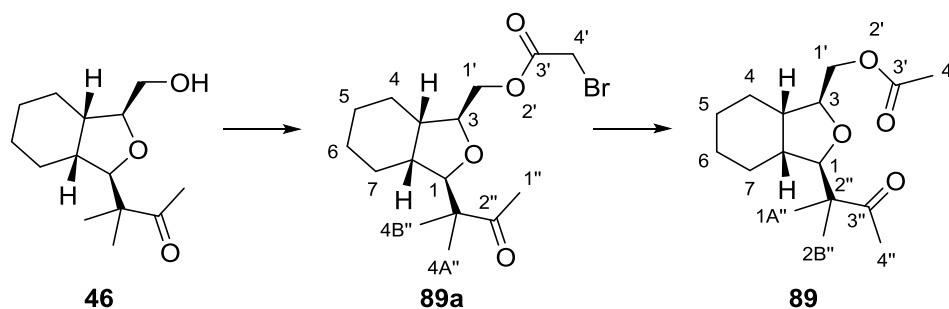

3-[(1R,3S,3aS,7aR)-3-(Hydroxymethyl)octahydro-2-benzofuran-1-yl]-3-methylbutan-2-one **46** (67 mg, 0.279) was dissolved in CH<sub>2</sub>Cl<sub>2</sub> (3 mL) and Et<sub>3</sub>N (80 μL, 0.558 mmol) was added. 2-Bromoacetyl bromide (260 μL, 0.558 mmol) was added and the solution was stirred at RT for 5 h. The solution was diluted with CH<sub>2</sub>Cl<sub>2</sub> (20 mL), washed with H<sub>2</sub>O (10 mL), brine (10 mL), and then the aqueous layers were extracted with CH<sub>2</sub>Cl<sub>2</sub> (2 x 10 mL). The combined organic layers were dried with MgSO<sub>4</sub>. The solvent was removed *in vacuo* and the crude residue purified by column chromatography on silica gel (33% EtOAc:hexane) to yield the product as a pale brown oil (67 mg, 67%). This compound was unstable so limited characterisation was possible. <sup>1</sup>H NMR (500 MHz, CDCl<sub>3</sub>) δ 4.29 (1H, dd, J=3.0, 12.0, Ha-1'), 4.16 (1H, dd, J=6.0, 12.0, Hb-1'), 4.03 (1H, ddd, J=3.0, 6.0, 9.0, H-3), 3.88 (2H, s, H-4'), 3.88-3.80 (1H, m, H-1), 2.18 (3H, s, H-1''), 2.07-2.01 (1H, m, H-7a), 1.95-1.88 (1H, m, H-3a), 1.75-1.68 (1H, m, CH<sub>2</sub>), 1.68-1.57 (3H, m, CH<sub>2</sub>), 1.45-1.23 (4H, m, CH<sub>2</sub>), 1.13 (3H, s, Me), 1.09 (3H, s, Me); LC-MS (ESI<sup>+</sup>) *m/z* 361 [M+H<sup>+</sup>], R<sub>t</sub> 1.50 min [method E]; HRMS [M+Na<sup>+</sup>] calcd for C<sub>16</sub>H<sub>25</sub>BrO<sub>4</sub>Na 361.1009 found 361.1013.

[(1S,3R,3aR,7aS)-3-(2-Methyl-3-oxobutan-2-yl)-octahydro-2-benzofuran-1-yl]methyl 2-bromoacetate **89a** (67 mg, 0.186 mmol) was dissolved in THF (37 mL) and Sml<sub>2</sub> (0.1 M in THF) was added dropwise (~9 mL) until the colour change of the Sml<sub>2</sub> from blue to yellow on addition slowed and the reaction mixture remained green for ~10 seconds before returning to a pale yellow. The solution was then diluted with Et<sub>2</sub>O (20 mL) and washed with H<sub>2</sub>O (20 mL) and brine (20 mL). The organic layer was dried with MgSO<sub>4</sub>. The crude yellow oil was purified by column chromatography on silica gel (5% MeOH:CH<sub>2</sub>Cl<sub>2</sub>) to yield **89** as a clear oil (26 mg, 49%). [α]<sub>D</sub><sup>24.3</sup> +25.4 (c=1.0 CHCl<sub>3</sub>); IR (film) 2929, 2858, 1739, 1701 cm<sup>-1</sup>; <sup>1</sup>H NMR (500 MHz, CDCl<sub>3</sub>) δ 4.25-4.19 (1H, m, Ha-1'), 4.06-3.97 (2H, m, Hb-1', H-3), 3.86 (1H, d, J=3.5, H-1), 2.17 (3H, s, H-4''), 2.08 (3H, s, H-4'), 2.06-1.98 (1H, m, H-7a), 1.83-1.76 (1H, m, H-3a), 1.75-1.57 (4H, m, CH<sub>2</sub>), 1.46-1.22 (4H, m, CH<sub>2</sub>), 1.12 (3H, s, Me), 1.09 (3H, s, Me), <sup>13</sup>C NMR (125 MHz, CDCl<sub>3</sub>) δ 213.2 (C3''), 171.1 (C3'), 89.7 (C1), 78.0 (C3), 65.7 (C1'), 51.6 (C2''), 39.4 (C3a or C7a), 39.4 (C3a or C7a), 29.9 (CH<sub>2</sub>), 27.0 (C4''), 24.2 (CH<sub>2</sub>), 24.1 (CH<sub>2</sub>), 22.1 (CH<sub>2</sub>), 21.0 (C4'' or Me), 21.0 (C4'' or Me), 20.6 (C4'' or Me); LC-MS (ESI<sup>+</sup>) *m/z* 305 [M+Na<sup>+</sup>], R<sub>t</sub> 1.48 min [method E]; HRMS [M+H<sup>+</sup>] calcd for C<sub>16</sub>H<sub>27</sub>O<sub>4</sub> 283.1904 found 283.1914; Found: C, 66.09; H, 8.81%; C<sub>16</sub>H<sub>26</sub>O<sub>4</sub> requires: C, 66.12; H, 8.72%.

## Assay methods

### SRB assay

Cells were seeded in 100µl medium into 96-well plates. After 36 hours, serial doubling dilutions of drug (or vehicle) were added to give the required dose range in sextuplicate across the plate. Cells were incubated for a further 96 hours. The medium was then removed and cells were fixed by adding 50µl of 10% (w/v) trichloroacetic acid (TCA) for one hour at room temperature. The plates were gently washed by immersion in tap water three times then air dried. 50µl of 0.4% (w/v) SRB in 1% (v/v) acetic acid was added to each well for one hour. Plates were then washed three times with 1% acetic acid and air dried. SRB was solubilised with 100ul/well 10mM Tris

pH10.5. Absorbance at 570nm was measured using a SPECTRAmax 340PC plate reader.

### Migration assay

Cells in standard tissue culture flasks were fluorescently labelled by incubation with 1µmol/L CellTracker Green 5-chloromethylfluorescein diacetate (Invitrogen, Paisley) concomitant with serum starvation for two hours. Following trypsinisation cells were counted and added to the upper wells of 8µm pore Fluoroblok™ membrane inserts in 24-well companion plates (BD Biosciences, Franklin Lakes, NJ). The lower chambers were filled with 800uL medium containing 5% heat- inactivated FCS (to measure chemotaxis) or serum-free medium (to measure unstimulated random motility). The assay plates were incubated in a humidified atmosphere at 37°C in 5% CO<sub>2</sub> in air for 16 hours. Cells which successfully migrated to the lower surface of the filter were visualised using an inverted fluorescence microscope.

## PCA methodology

Principal Components Analysis (PCA) was conducted using SIMCA-P+<sup>4</sup>, and the scatter plot was created using Spotfire<sup>5</sup>. The descriptors used for the calculation of the PCA models are given in Table S1.

**Table S1.** Molecular descriptors calculated for the generation of the PCA model.

| <b>Descriptor ID</b> | <b>Descriptor Definition</b>                   |
|----------------------|------------------------------------------------|
| Molecular Weight     | Molecular weight                               |
| No. Bonds            | Number of bonds                                |
| No. Rings            | Number of rings                                |
| AlogP                | Calculated octanol/water partition coefficient |
| No. Rotatable Bonds  | Number of rotatable bonds                      |
| No. H acceptors      | Number of hydrogen-bond acceptors              |
| No. H donors         | Number of hydrogen-bond donors                 |
| O count              | Number of oxygen atoms                         |
| H count              | Number of hydrogen atoms                       |
| No. Stereocentres    | Number of stereocentres                        |
| N count              | Number of nitrogen atoms                       |
| No. Aromatic Rings   | Number of aromatic rings                       |
| No. Aromatic Bonds   | Number of aromatic bonds                       |

The first two principal components of the PCA model explain 69% of the variance in the data which indicates that visualisation in a two-dimensional scatterplot is reasonable for interpretation of the chemistry spaces covered by the libraries.

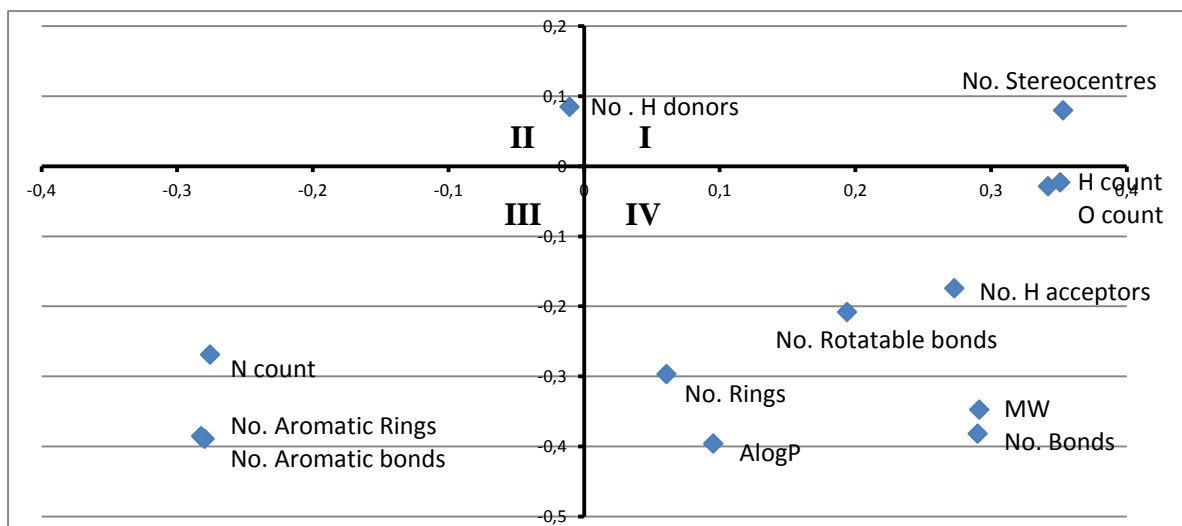

**Figure S1.** The loading scores of the Principal Components Analysis.

The loadings plot is provided in Figure S1 and can assist in interpreting the PCA scores plot of Figure 5 in the main paper. The loadings plot illustrates those molecular descriptors that are most important for explaining the variance of the molecules in those regions of the scores plot when overlaid. Descriptors that lie proximate to each other on the loadings plot are correlated, such as aromatic rings and bonds in quadrant III. Furthermore, the magnitude of deviation from the origin indicates the importance of each descriptor in that region of the plot, as seen in those molecules in quadrant III being more nitrogen-rich in their composition. Therefore, it can be readily observed that the screening collection is enriched for nitrogen-containing compounds and aromaticity, as opposed to the cembranoid-like and cembranoid libraries.

## Crystallography data for compound 26

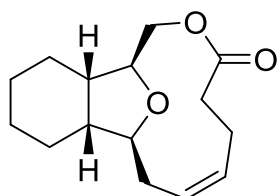

26

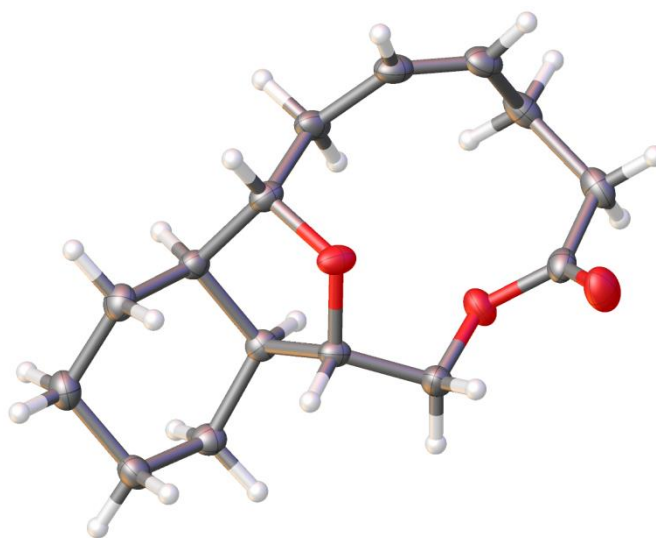

Formula:  $C_{15}H_{22}O_3$ ;  $M_r = 250.32$ ; crystal dimensions: 0.62 x 0.22 x 0.06 mm; crystal system: orthorhombic; space group:  $P2_12_12_1$ ;  $a = 5.25570(10)$  Å,  $b = 10.3241(4)$  Å,  $c = 24.6007(9)$  Å,  $\alpha = 90^\circ$ ,  $\beta = 90^\circ$ ,  $\gamma = 90^\circ$ ;  $V = 1334.84(8)$  Å<sup>3</sup>;  $Z = 4$ ;  $\rho_{\text{calcd}} = 1.246$  Mg/m<sup>3</sup>;  $\mu = 0.085$  mm<sup>-1</sup>; Mo  $K\alpha$  radiation,  $\lambda = 0.71073$  Å;  $T = 120(2)$  K;  $2\theta_{\text{max}} = 54.9^\circ$ ; 10722/3007 measured/independent reflections;  $R_{\text{int}} = 0.0442$ ;  $R = 0.0418$ ,  $wR = 0.0935$ ;  $\Delta\rho_{\text{max}} = 0.206$  eÅ<sup>-3</sup>,  $\Delta\rho_{\text{min}} = -0.208$  eÅ<sup>-3</sup>. Colourless blade crystals gave good diffraction. The data were collected on a Nonius-Kappa CCD area detector mounted at the window of an FR591 rotating anode generator with a Mo anode and equipped with an Oxford Cryosystems cryostream device. Nonius COLLECT<sup>6</sup> was used to record images and HKL (Denzo and Scalepack)<sup>7</sup> was used for data integration. The structure was solved by direct methods using SHELXT<sup>8</sup> and refined on  $F_o^2$  by full-matrix least squares refinement using SHELXL.<sup>9</sup> All non-hydrogen atoms were refined with anisotropic displacement parameters. Hydrogen atoms were added at calculated positions and refined using a riding model with isotropic displacement parameters based on the equivalent isotropic displacement parameter ( $U_{\text{eq}}$ ) of the parent atom. The structure was deposited on the Cambridge Structural Database with the deposition number CCDC 1010197.

## Crystallography data for compound 40

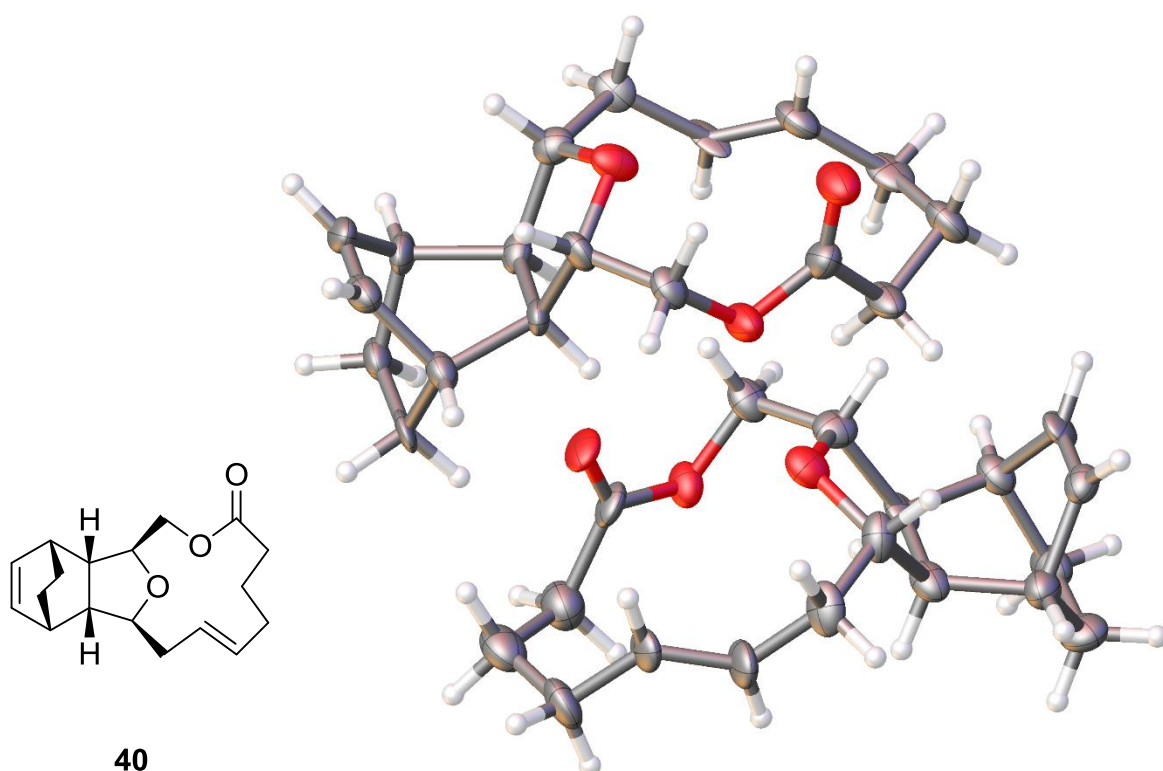

**40**

Formula:  $C_{18}H_{24}O_3$ ;  $M_r = 288.37$ ; crystal dimensions: 0.3 x 0.2 x 0.19 mm; crystal system: monoclinic; space group:  $P2_1$ ;  $a = 10.801(3)$  Å,  $b = 11.564(3)$  Å,  $c = 12.083(4)$  Å,  $\alpha = 90^\circ$ ,  $\beta = 90.15(3)^\circ$ ,  $\gamma = 90^\circ$ ;  $V = 1509.2(8)$  Å<sup>3</sup>;  $Z = 4$ ;  $\rho_{\text{calcd}} = 1.269$  Mg/m<sup>3</sup>;  $\mu = 0.085$  mm<sup>-1</sup>; Mo  $K\alpha$  radiation,  $\lambda = 0.71073$  Å;  $T = 120(2)$  K;  $2\theta_{\text{max}} = 50.2^\circ$ ; 9752/9752 measured/independent reflections;  $R_{\text{int}} = \text{N/A}$ ;  $R = 0.0899$ ,  $wR = 0.2274$ ;  $\Delta\rho_{\text{max}} = 0.348$  eÅ<sup>-3</sup>,  $\Delta\rho_{\text{min}} = -0.308$  eÅ<sup>-3</sup>. Colourless block crystals were poorly diffracting with no significant data beyond 0.84 Å resolution and also non-merohedrally twinned, with a twinning ratio of 0.537:0.463. The twinned components were related by 179.8° rotation about reciprocal lattice vector 001. The data were collected on a Nonius-Kappa CCD area detector mounted at the window of an FR591 rotating anode generator with a Mo anode and equipped with an Oxford Cryosystems cryostream device. Nonius COLLECT<sup>6</sup> was used to record images and RigakuOD CrysAlisPro<sup>10</sup> was used for data integration. The structure was solved by direct methods using SHELXT<sup>8</sup> and refined on  $F_o^2$  by full-matrix least squares refinement using SHELXL.<sup>9</sup> All non-hydrogen atoms were refined with anisotropic displacement parameters. Hydrogen atoms were added at calculated positions and refined using a riding model with isotropic displacement parameters based on the equivalent isotropic displacement parameter ( $U_{\text{eq}}$ ) of the parent atom. The structure was deposited on the Cambridge Structural Database with the deposition number CCDC 1011320.

## Crystallography data for compound 42

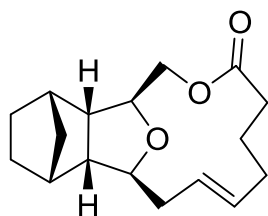

42

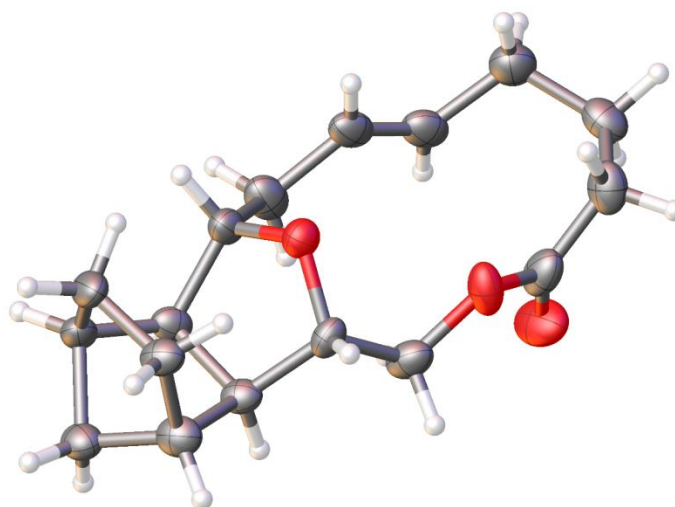

Formula:  $C_{17}H_{24}O_3$ ;  $M_r = 276.36$ ; crystal dimensions: 0.4 x 0.2 x 0.03 mm; crystal system: orthorhombic; space group:  $P2_12_12_1$ ;  $a = 5.7992(6)$  Å,  $b = 12.0419(10)$  Å,  $c = 20.795(2)$  Å,  $\alpha = 90^\circ$ ,  $\beta = 90^\circ$ ,  $\gamma = 90^\circ$ ;  $V = 1452.2(2)$  Å<sup>3</sup>;  $Z = 4$ ;  $\rho_{\text{calcd}} = 1.264$  Mg/m<sup>3</sup>;  $\mu = 0.085$  mm<sup>-1</sup>; Mo  $K\alpha$  radiation,  $\lambda = 0.71073$  Å;  $T = 120(2)$  K;  $2\theta_{\text{max}} = 54.9^\circ$ ; 17321/3252 measured/independent reflections;  $R_{\text{int}} = 0.1130$ ;  $R = 0.1002$ ,  $wR = 0.2476$ ;  $\Delta\rho_{\text{max}} = 0.534$  eÅ<sup>-3</sup>,  $\Delta\rho_{\text{min}} = -0.400$  eÅ<sup>-3</sup>. Colourless plate crystals were poorly diffracting. The data were collected on a Nonius-Kappa CCD area detector mounted at the window of an FR591 rotating anode generator with a Mo anode and equipped with an Oxford Cryosystems cryostream device. Nonius COLLECT<sup>6</sup> was used to record images and RigakuOD CrysAlisPro<sup>10</sup> was used for data integration. The structure was solved by direct methods using SHELXT<sup>8</sup> and refined on  $F_o^2$  by full-matrix least squares refinement using SHELXL.<sup>9</sup> All non-hydrogen atoms were refined with anisotropic displacement parameters. Hydrogen atoms were added at calculated positions and refined using a riding model with isotropic displacement parameters based on the equivalent isotropic displacement parameter ( $U_{\text{eq}}$ ) of the parent atom. The structure was deposited on the Cambridge Structural Database with the deposition number CCDC 1435146.

## Crystallography data for compound 69

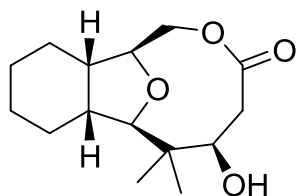

69

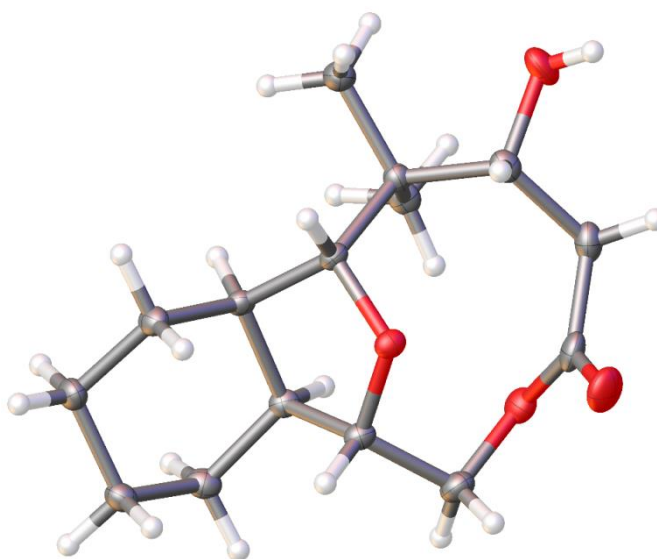

Formula:  $C_{15}H_{24}O_4$ ;  $M_r = 268.34$ ; crystal dimensions: 0.45 x 0.4 x 0.38 mm; crystal system: orthorhombic; space group:  $P2_12_12_1$ ;  $a = 9.16700(10)$  Å,  $b = 10.5275(2)$  Å,  $c = 14.3960(3)$  Å,  $\alpha = 90^\circ$ ,  $\beta = 90^\circ$ ,  $\gamma = 90^\circ$ ;  $V = 1389.29(4)$  Å<sup>3</sup>;  $Z = 4$   $\rho_{\text{calcd}} = 1.283$  Mg/m<sup>3</sup>;  $\mu = 0.091$  mm<sup>-1</sup>; Mo  $K\alpha$  radiation,  $\lambda = 0.71073$  Å;  $T = 120(2)$  K;  $2\theta_{\text{max}} = 55.4^\circ$ ; 14418/3181 measured/independent reflections;  $R_{\text{int}} = 0.0361$ ;  $R = 0.0324$ ,  $wR = 0.0756$ ;  $\Delta\rho_{\text{max}} = 0.178$  eÅ<sup>-3</sup>,  $\Delta\rho_{\text{min}} = -0.174$  eÅ<sup>-3</sup>. Colourless block crystals diffracted well. The data were collected on a Nonius-Kappa CCD area detector mounted at the window of an FR591 rotating anode generator with a Mo anode and equipped with an Oxford Cryosystems cryostream device. Nonius COLLECT<sup>6</sup> was used to record images and HKL (Denzo and Scalepack)<sup>7</sup> was used for data integration. The structure was solved by direct methods using SHELXS<sup>11</sup> and refined on  $F_o^2$  by full-matrix least squares refinement using SHELXL.<sup>9</sup> All non-hydrogen atoms were refined with anisotropic displacement parameters. Hydrogen atoms were added at calculated positions and refined using a riding model with isotropic displacement parameters based on the equivalent isotropic displacement parameter ( $U_{\text{eq}}$ ) of the parent atom. The structure was deposited on the Cambridge Structural Database with the deposition number CCDC 1435148.



## NCI cytotoxicity screening compounds

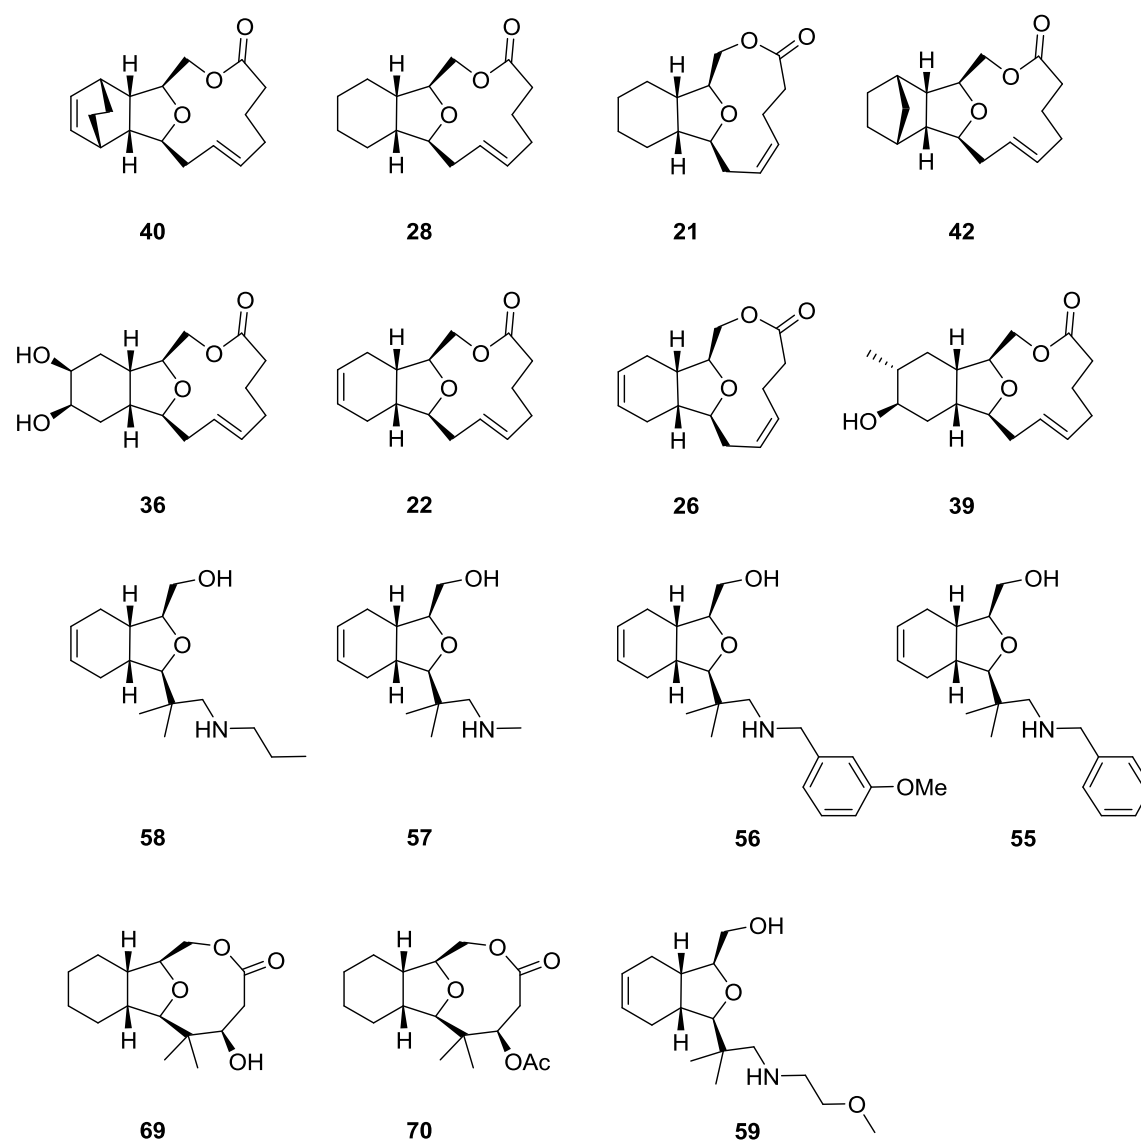

Figure S2: Compounds screened at the NCI for cytotoxicity in a 60 cell line panel

## References

1. J. Mann, A. Thomas, *Chem. Commun.* **1985**, 737-738.
2. S. Hanessian, P. J. Murray, *J Org Chem*, **1987**, 52, 1170-1172.
3. J. Mann, A. Thomas, *J Chem Soc., Perkin Trans 1*, **1986**, 2279-2285.
4. Simca-P+ 12.0, Umetrics, Umeå, Sweden, <http://www.umetrics.com/>
5. Spotfire Decision Site, Tibco, Palo Alto, CA, USA, <http://spotfire.tibco.com/>
6. R. W. W. Hooft, COLLECT data collection software, Nonius B.V., 1998.
7. Z. Otwinowski, W. Minor, *Macromolecular Crystallography*, Pt A. 1997; 276, 307-326.
8. G. M. Sheldrick, *Acta Cryst.*, 2015, A71, 3-8.
9. G. M. Sheldrick, *Acta Cryst.*, 2015, C71, 3-8.
10. CrysAlisPro Software System, Rigaku Oxford Diffraction, Yarnton, Oxford, UK, 2015.
11. G. M. Sheldrick, *Acta Cryst.*, 2008, A64, 112-122.

(S)-5-((*tert*-Butyldiphenylsilyloxy)methyl)furan-2-(5*H*)one **8**

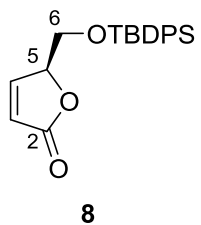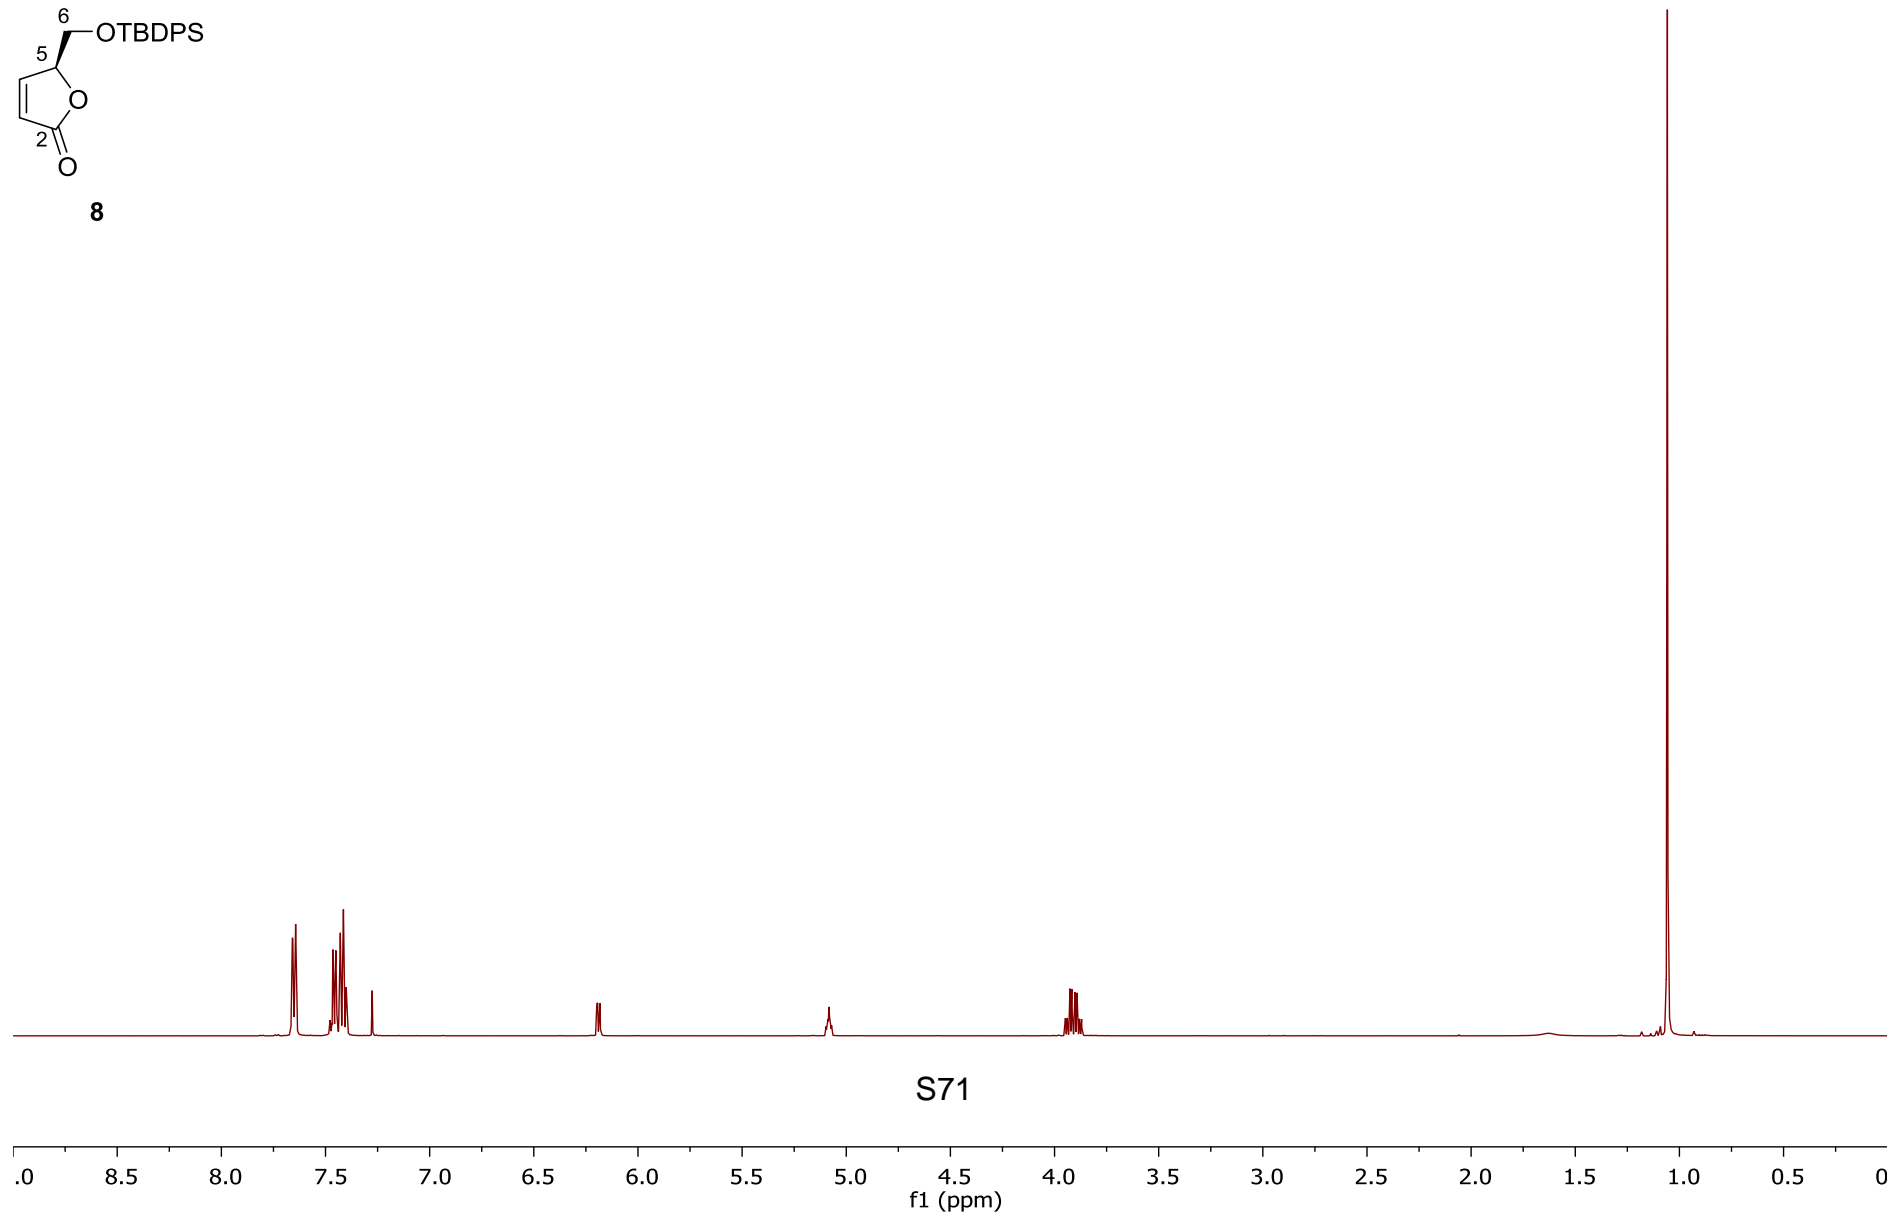

(S)-5-((*tert*-Butyldiphenylsilyloxy)methyl)furan-2-(5*H*)one **8**

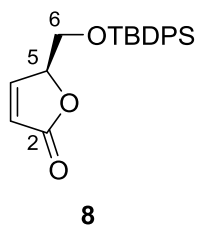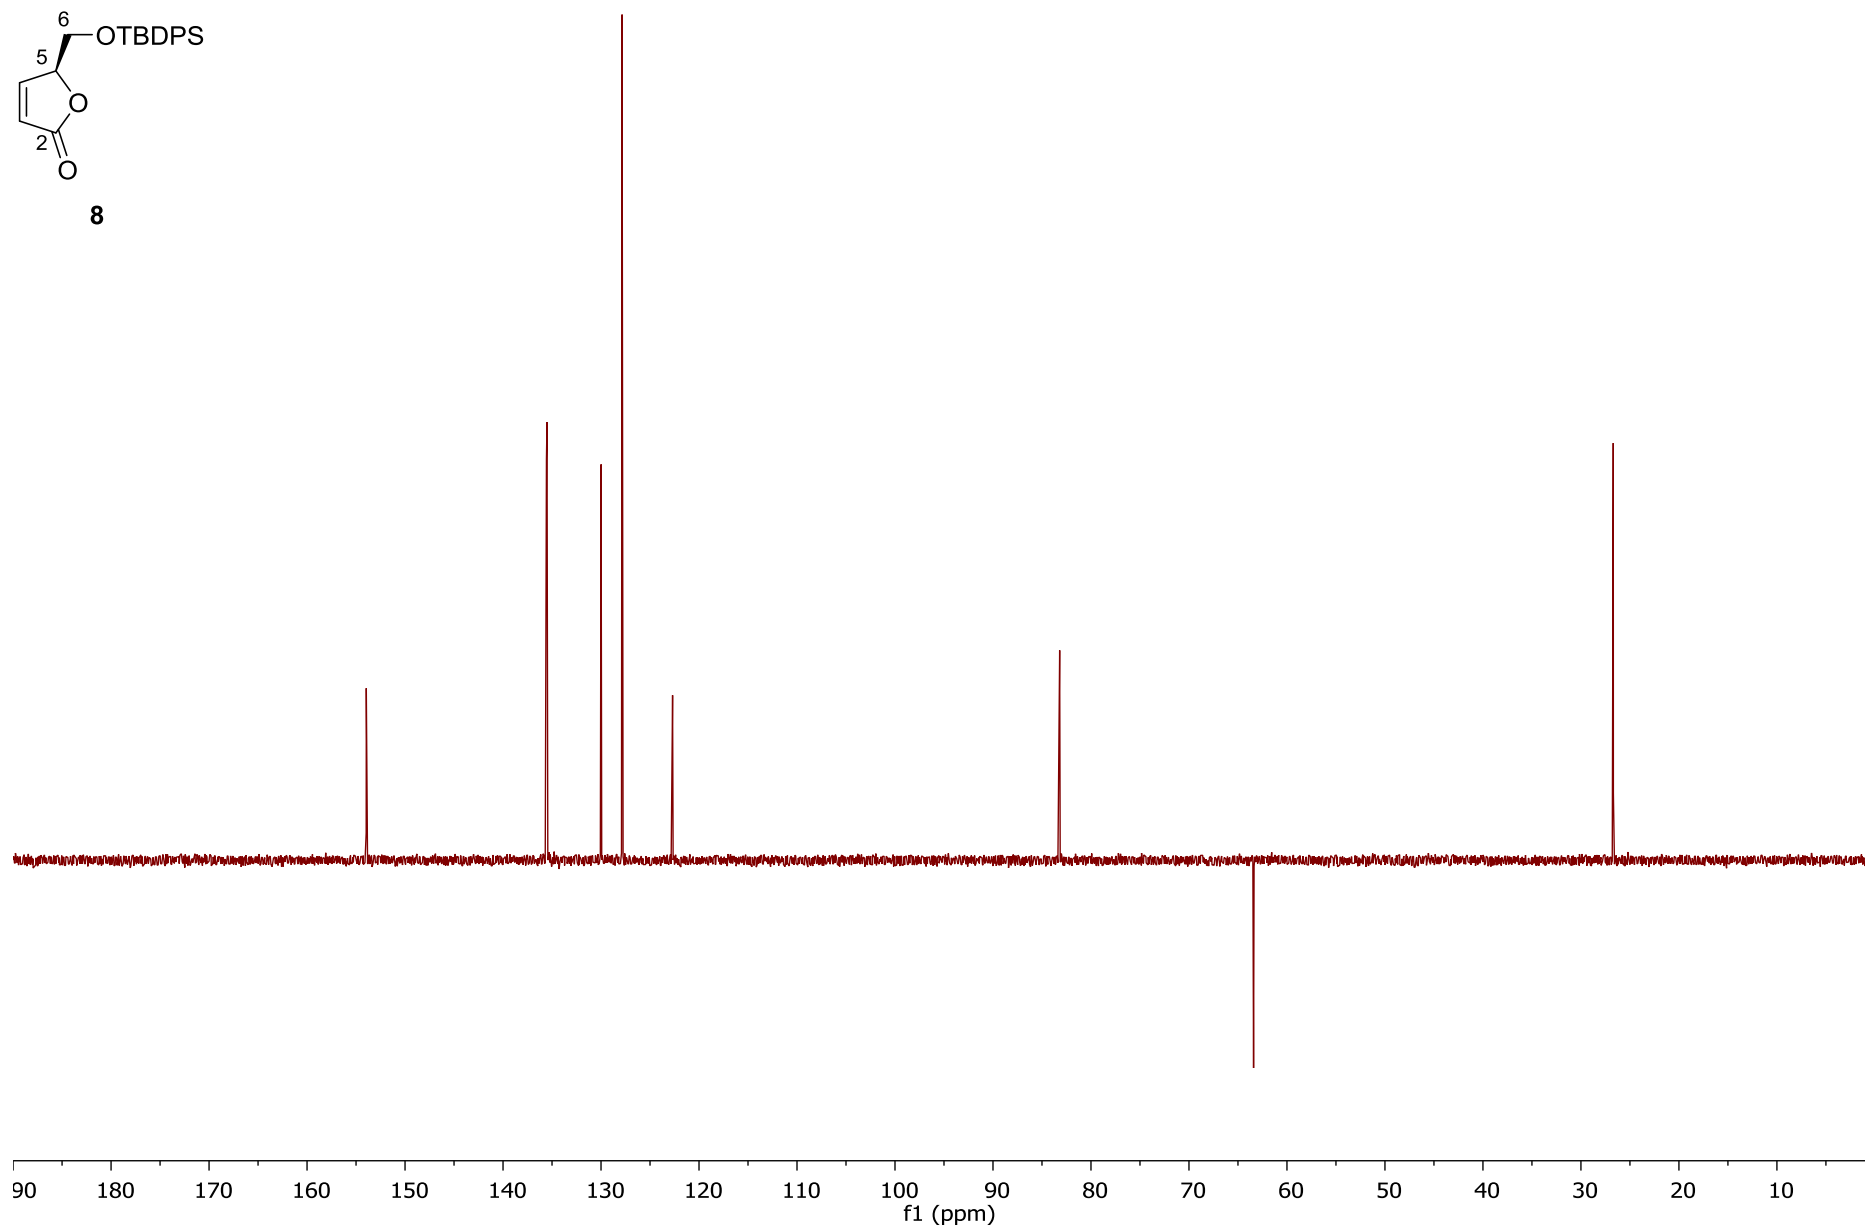

(3*S*)-3-((*tert*-Butyldiphenylsilyloxy)methyl)-3a,4,7,7a-tetrahydroisobenzofuran-1-(3*H*)-one **10**

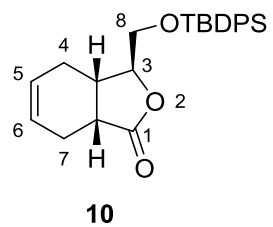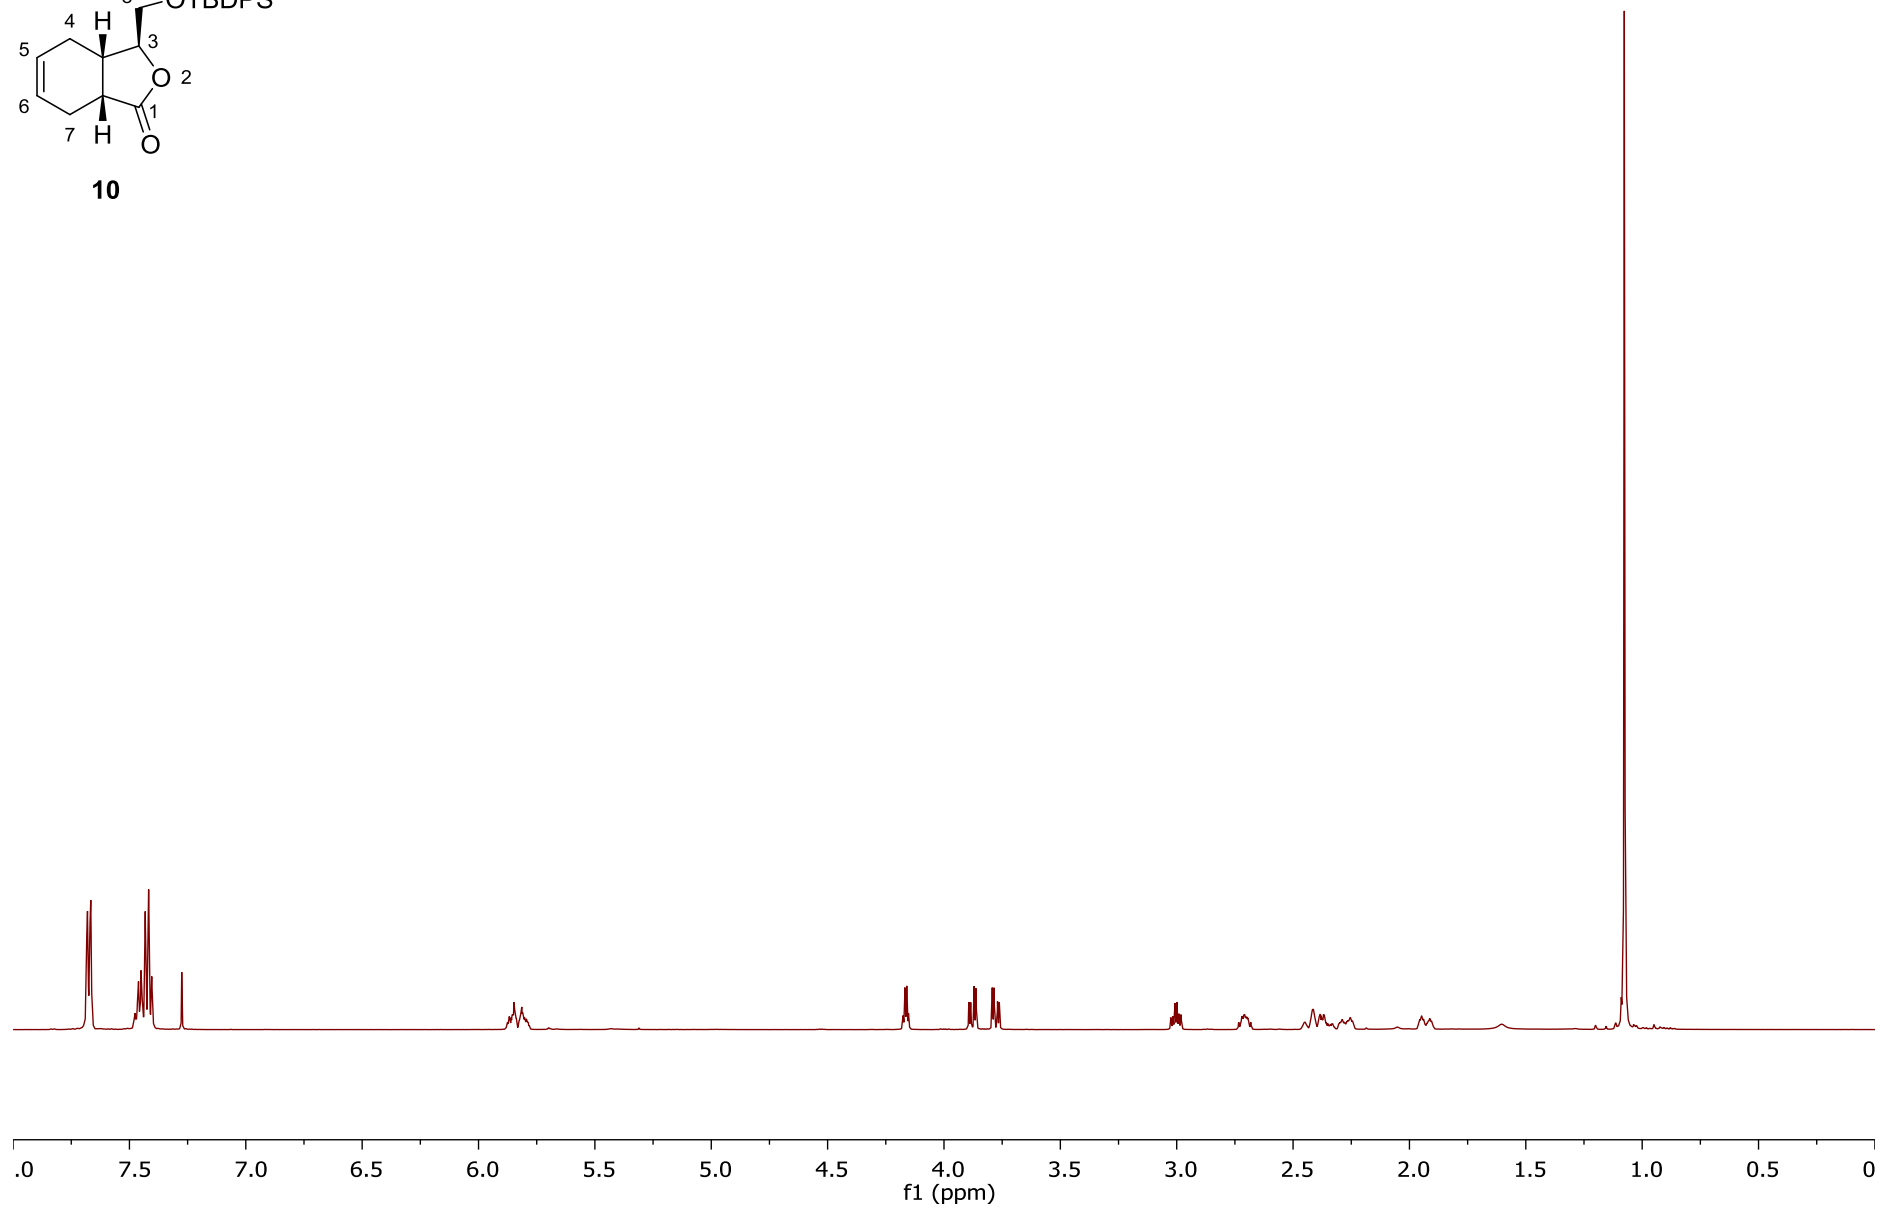

(3*S*)-3-((*tert*-Butyldiphenylsilyloxy)methyl)-3a,4,7,7a-tetrahydroisobenzofuran-1-(3*H*)-one **10**

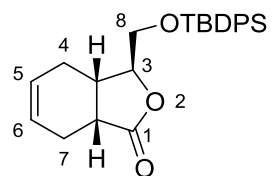

**10**

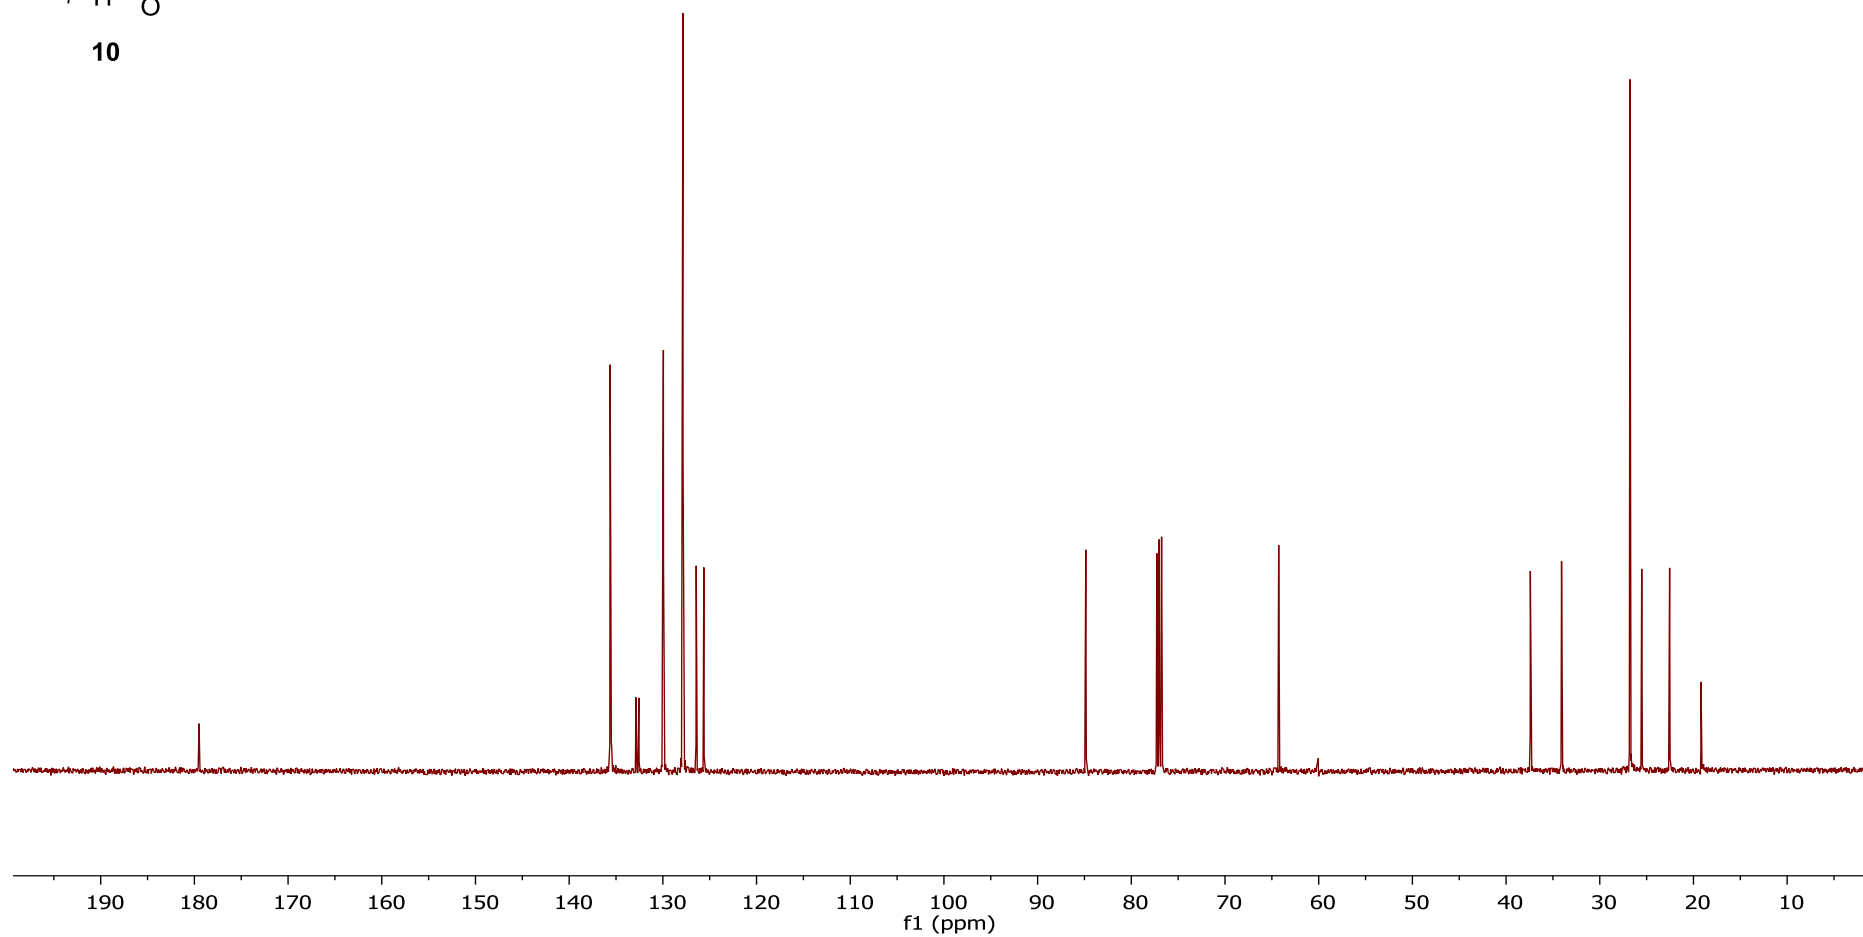

(3*S*,3*aS*,7*aR*)-3-((*tert*-Butyldiphenylsilyloxy)methyl)-1,3,3*a*,4,7,7*a*-hexahydroisobenzofuran-1-ol **11**

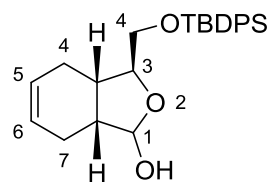

**11**

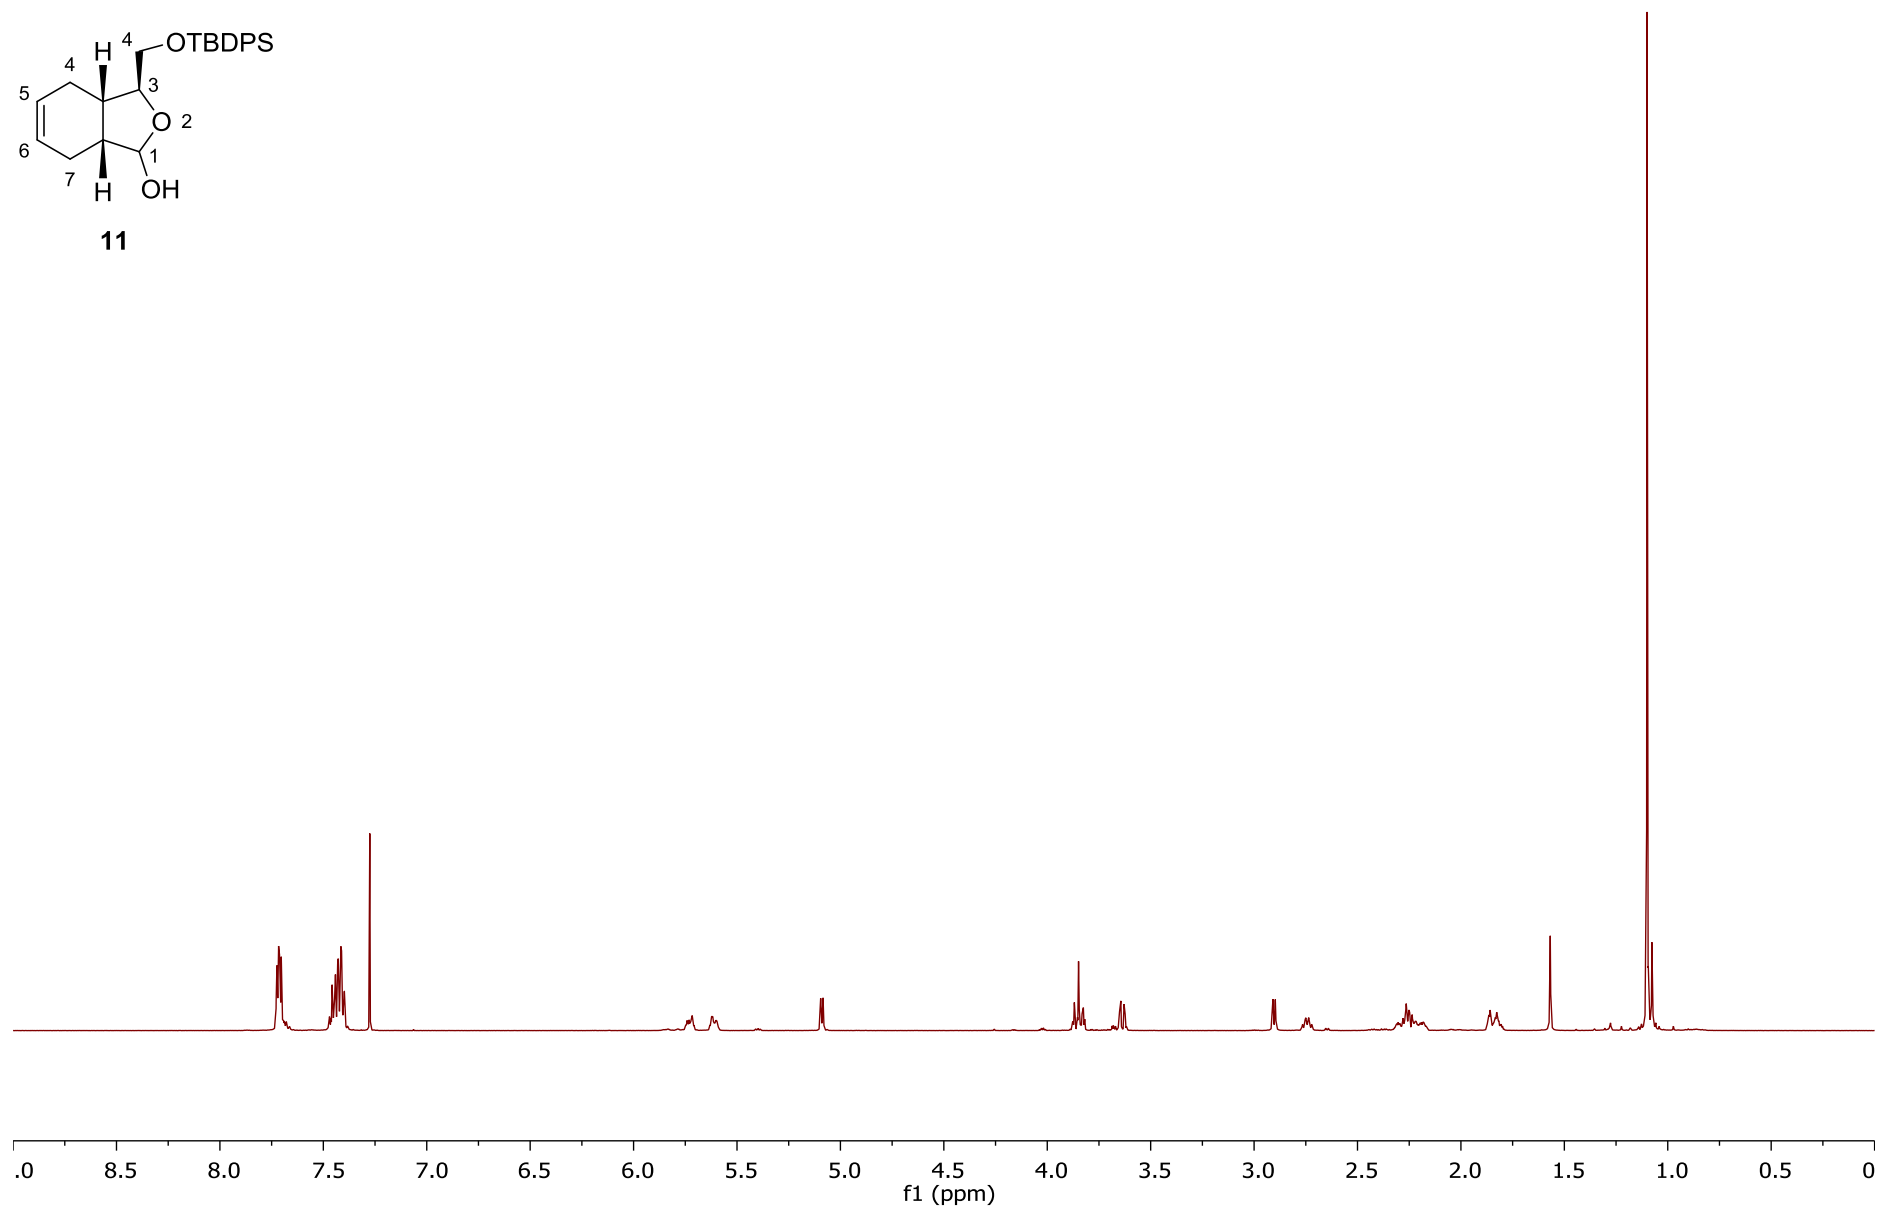

(3*S*,3*aS*,7*aR*)-3-((*tert*-Butyldiphenylsilyloxy)methyl)-1,3,3*a*,4,7,7*a*-hexahydroisobenzofuran-1-ol **11**

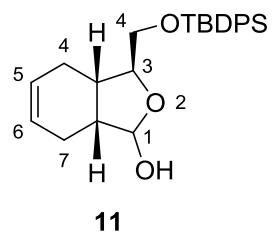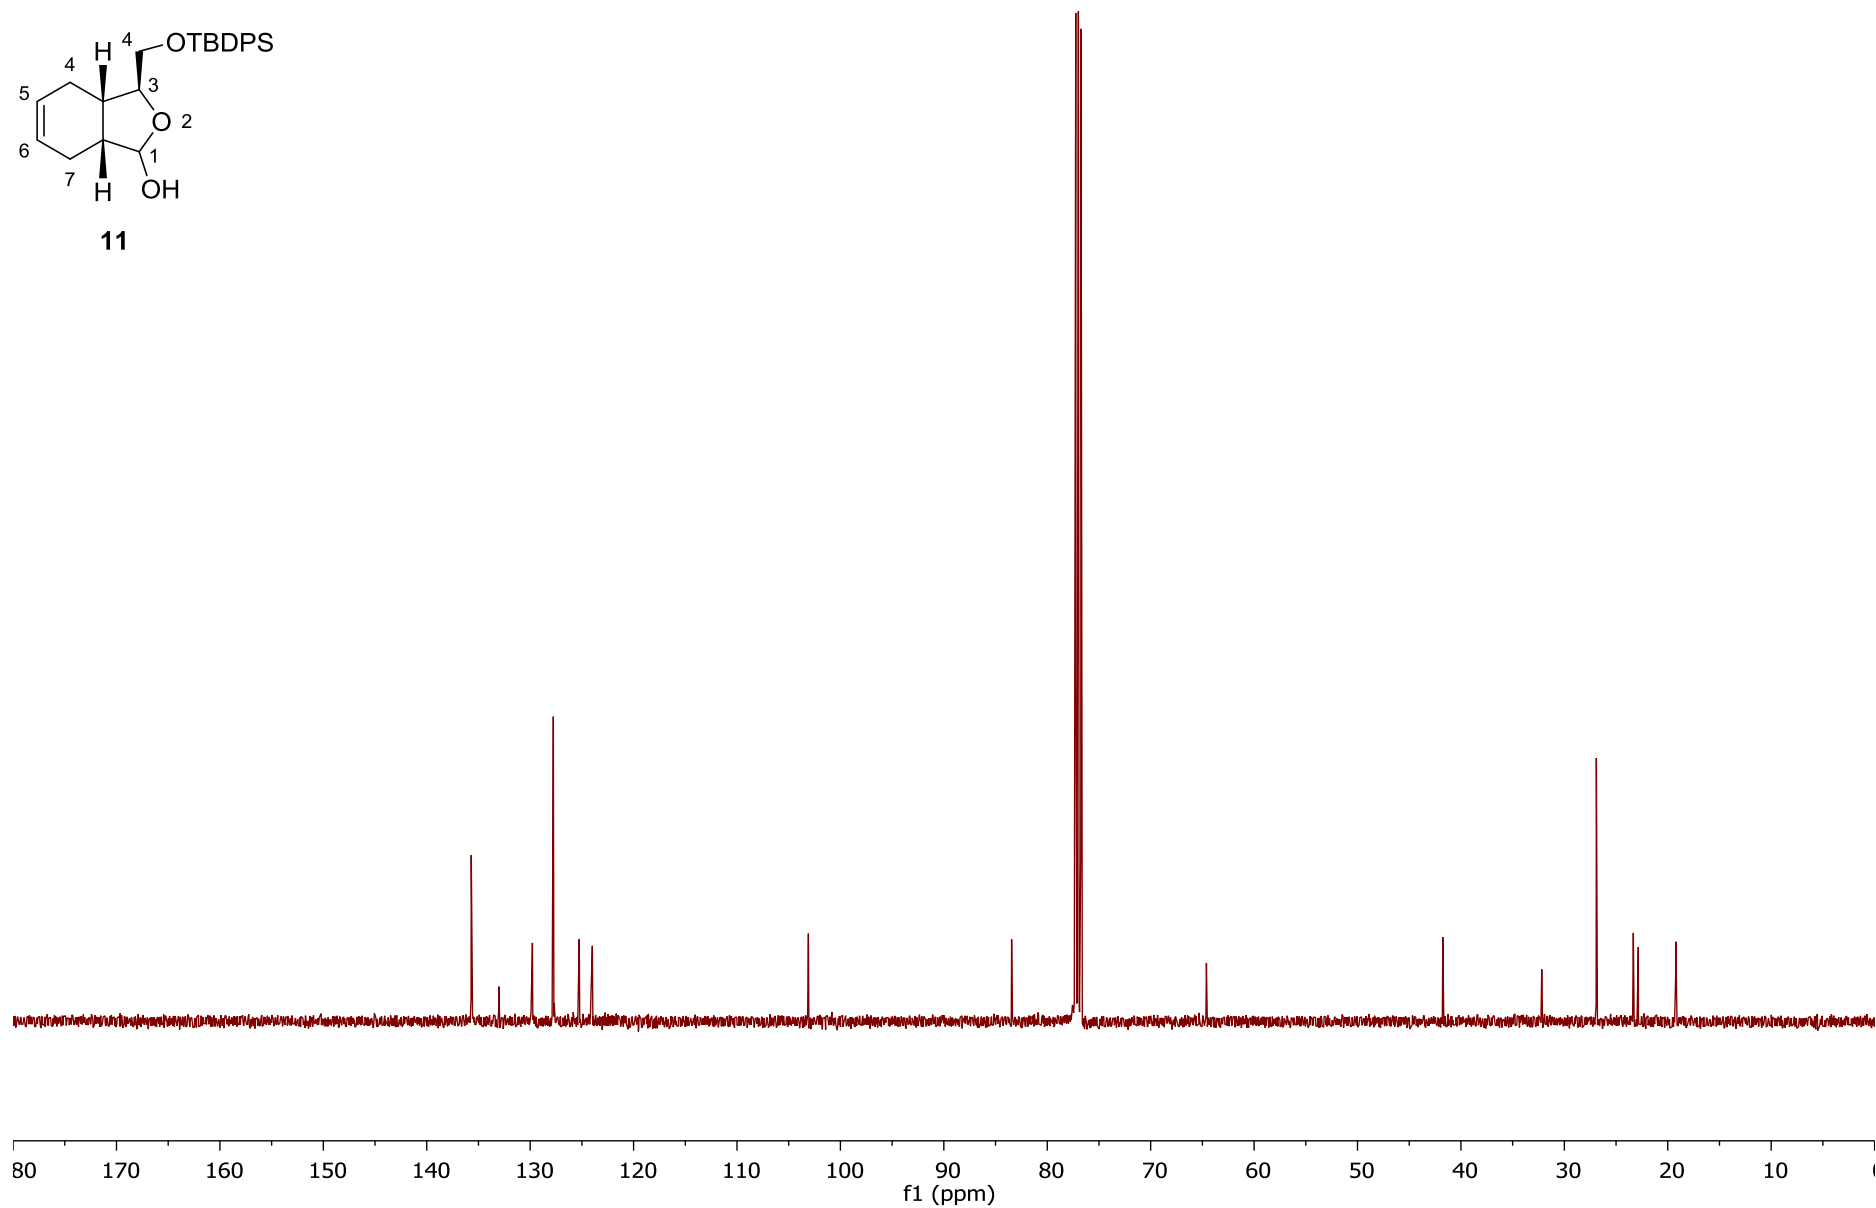



(((1*S*,3*S*,3*aR*,7*aS*)-3-Allyl-1,3,3*a*,4,7,7*a*-hexahydroisobenzofuran-1-yl)methoxy)(*tert*-butyl)diphenylsilane **12**

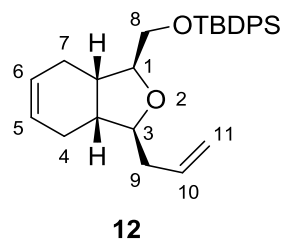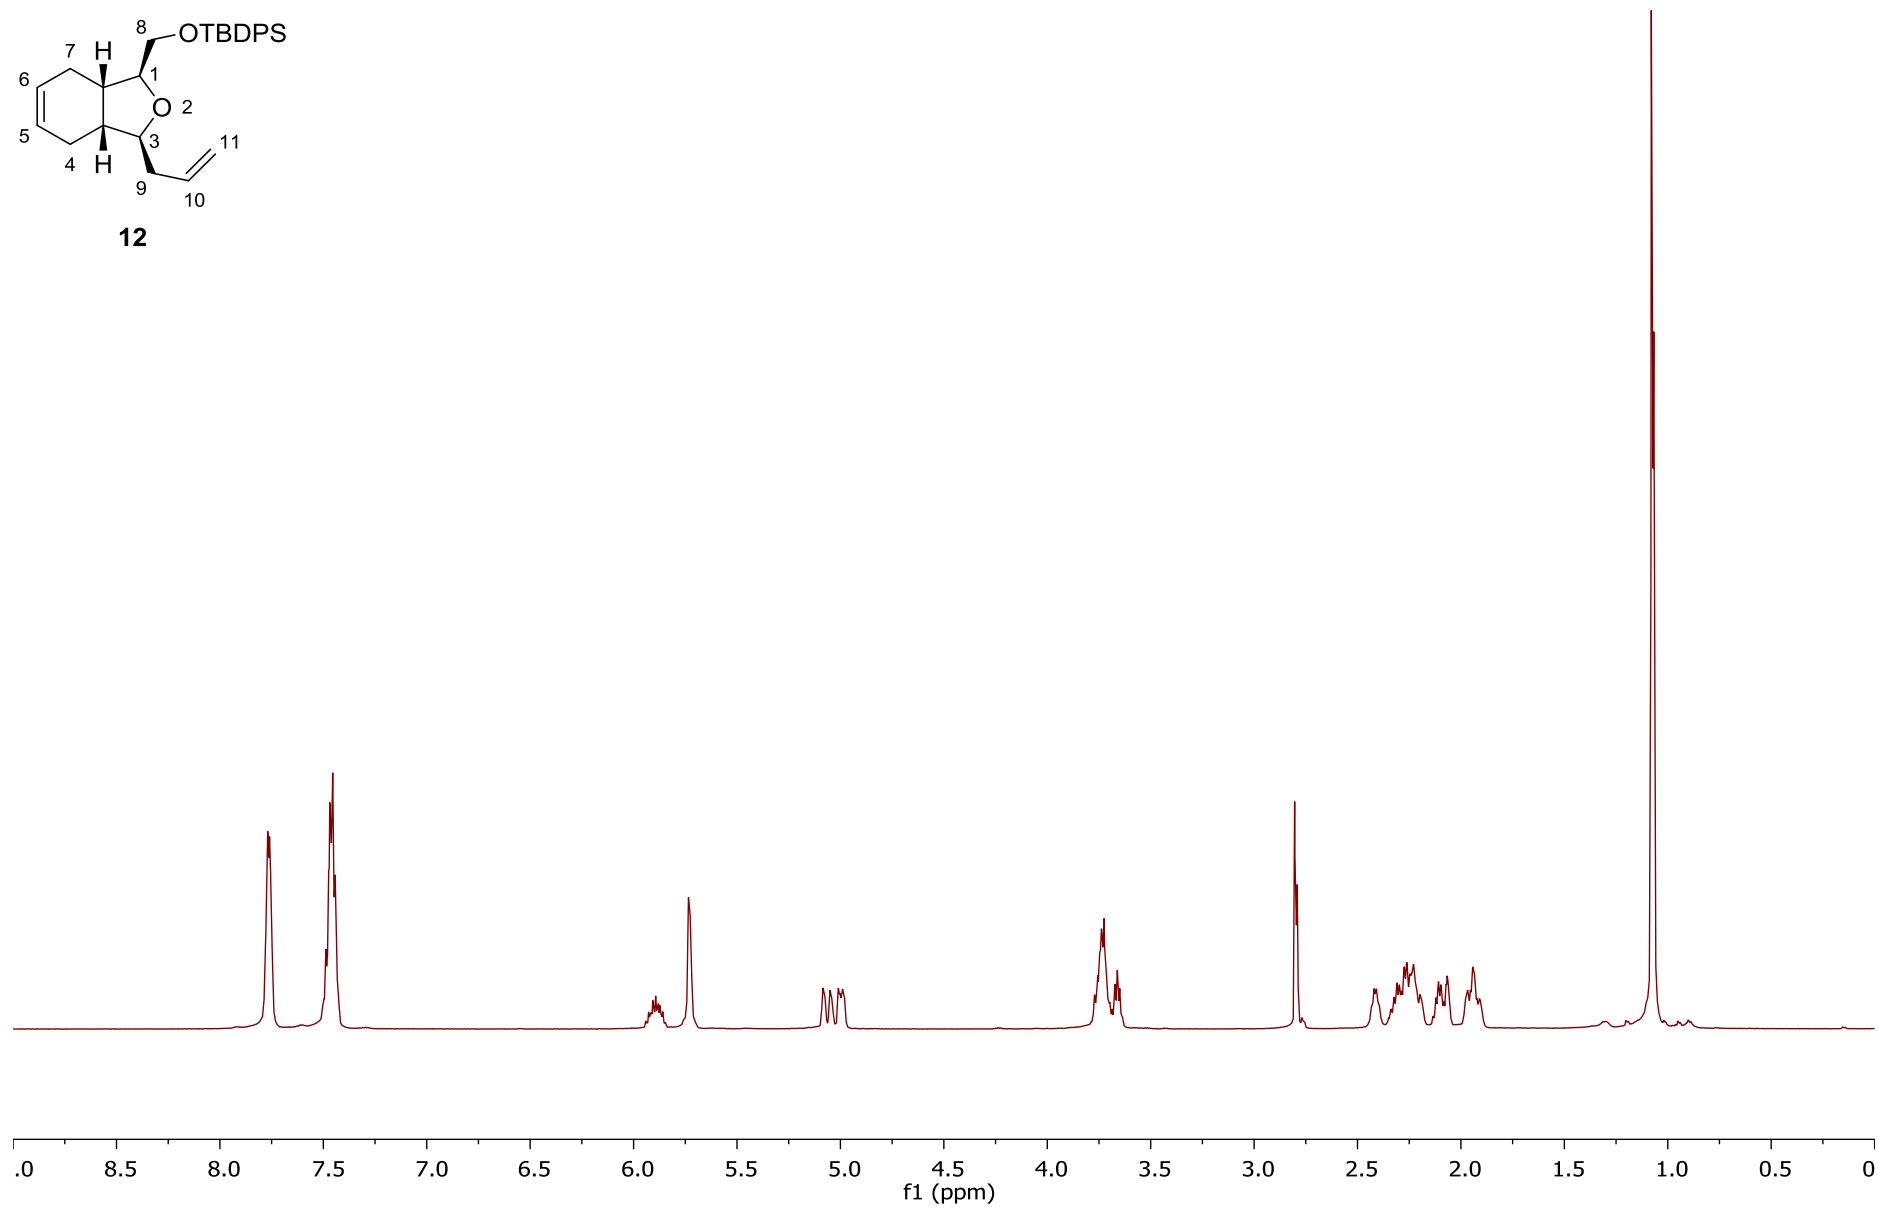

(((1*S*,3*S*,3*aR*,7*aS*)-3-Allyl-1,3,3*a*,4,7,7*a*-hexahydroisobenzofuran-1-yl)methoxy)(*tert*-butyl)diphenylsilane **12**

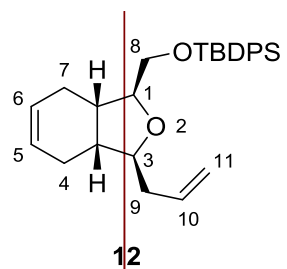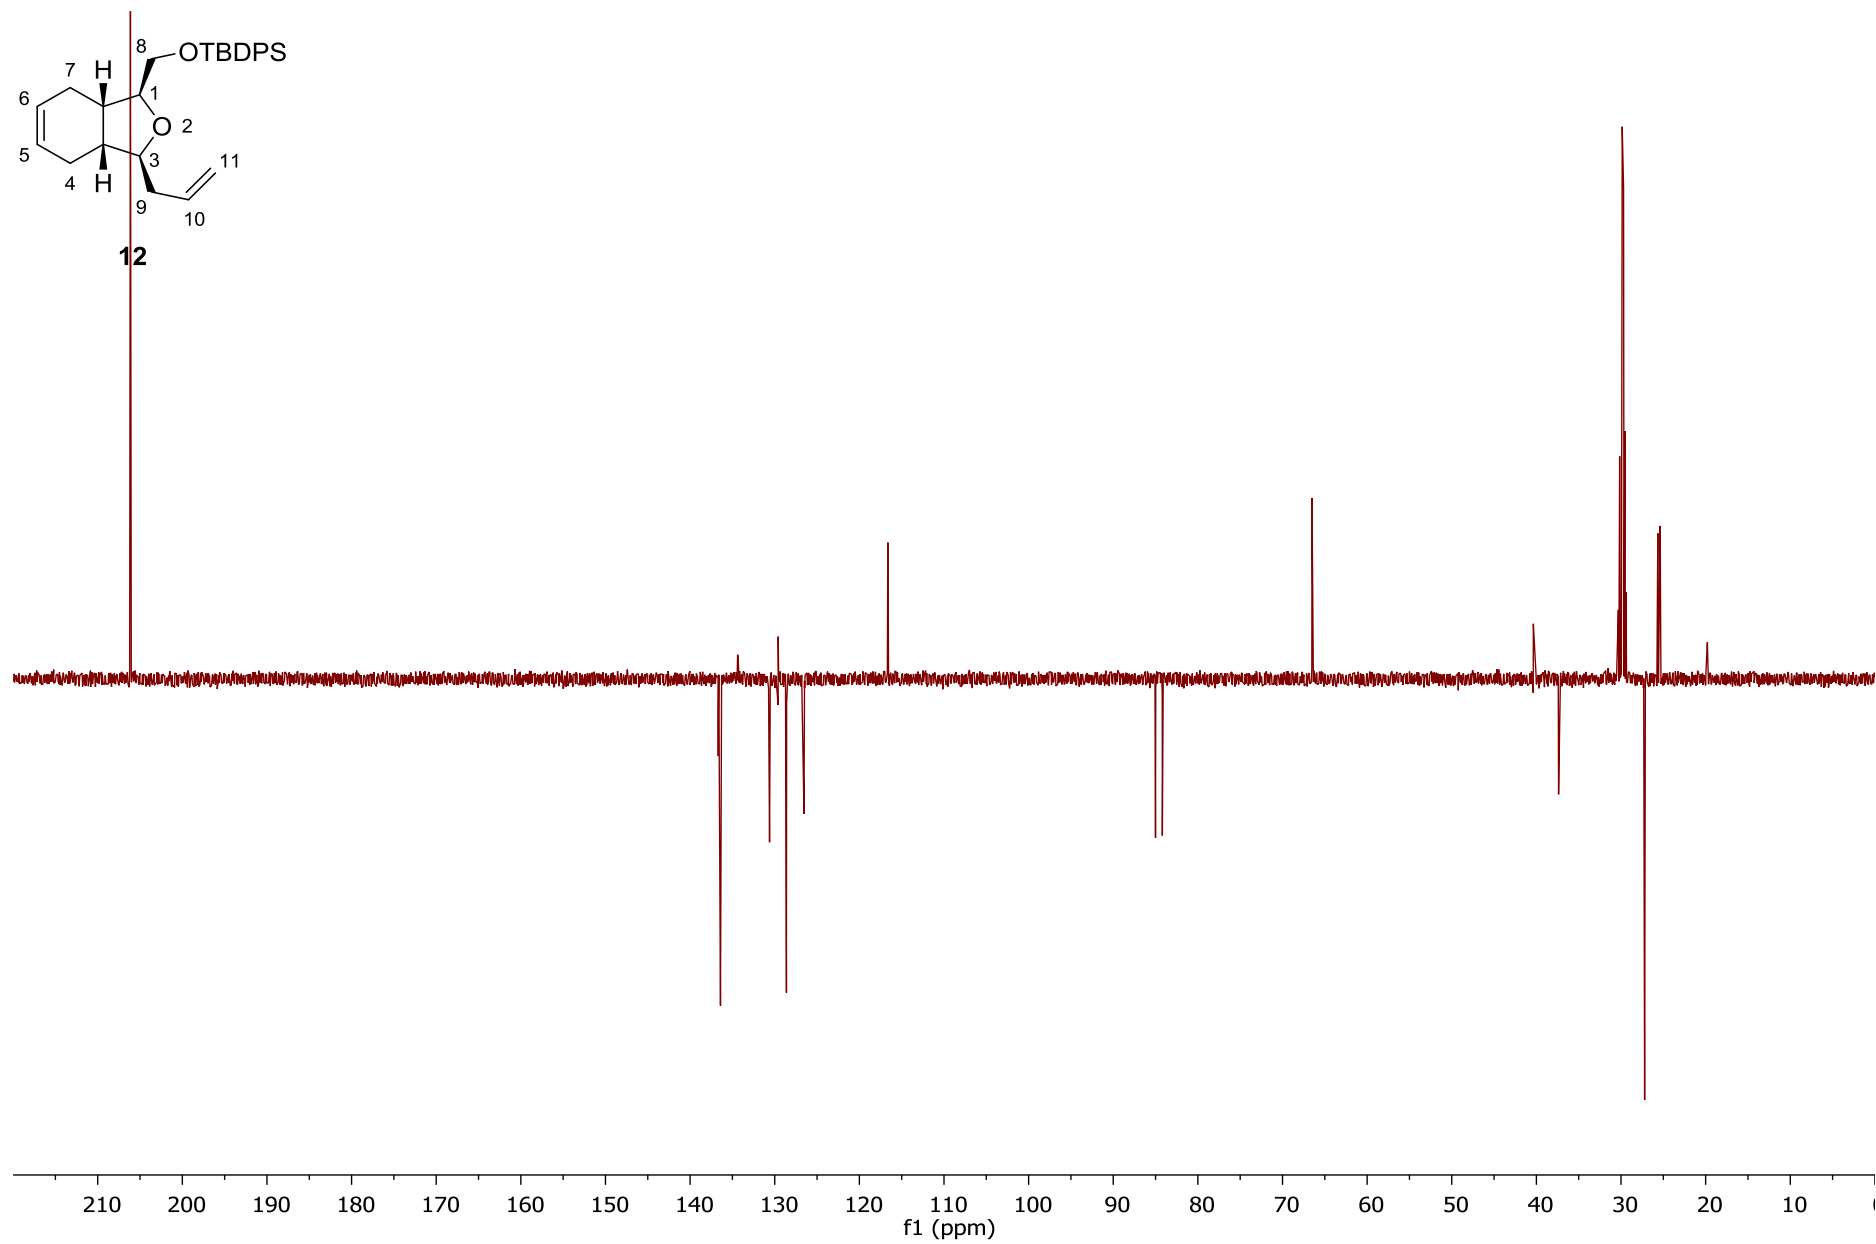

((1*S*,3*S*,3*aR*,7*aS*)-3-Allyl-1,3,3*a*,4,7,7*a*-hexahydroisobenzofuran-1-yl)methanol **14**

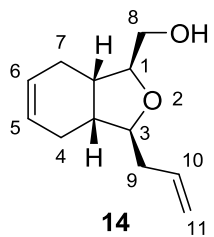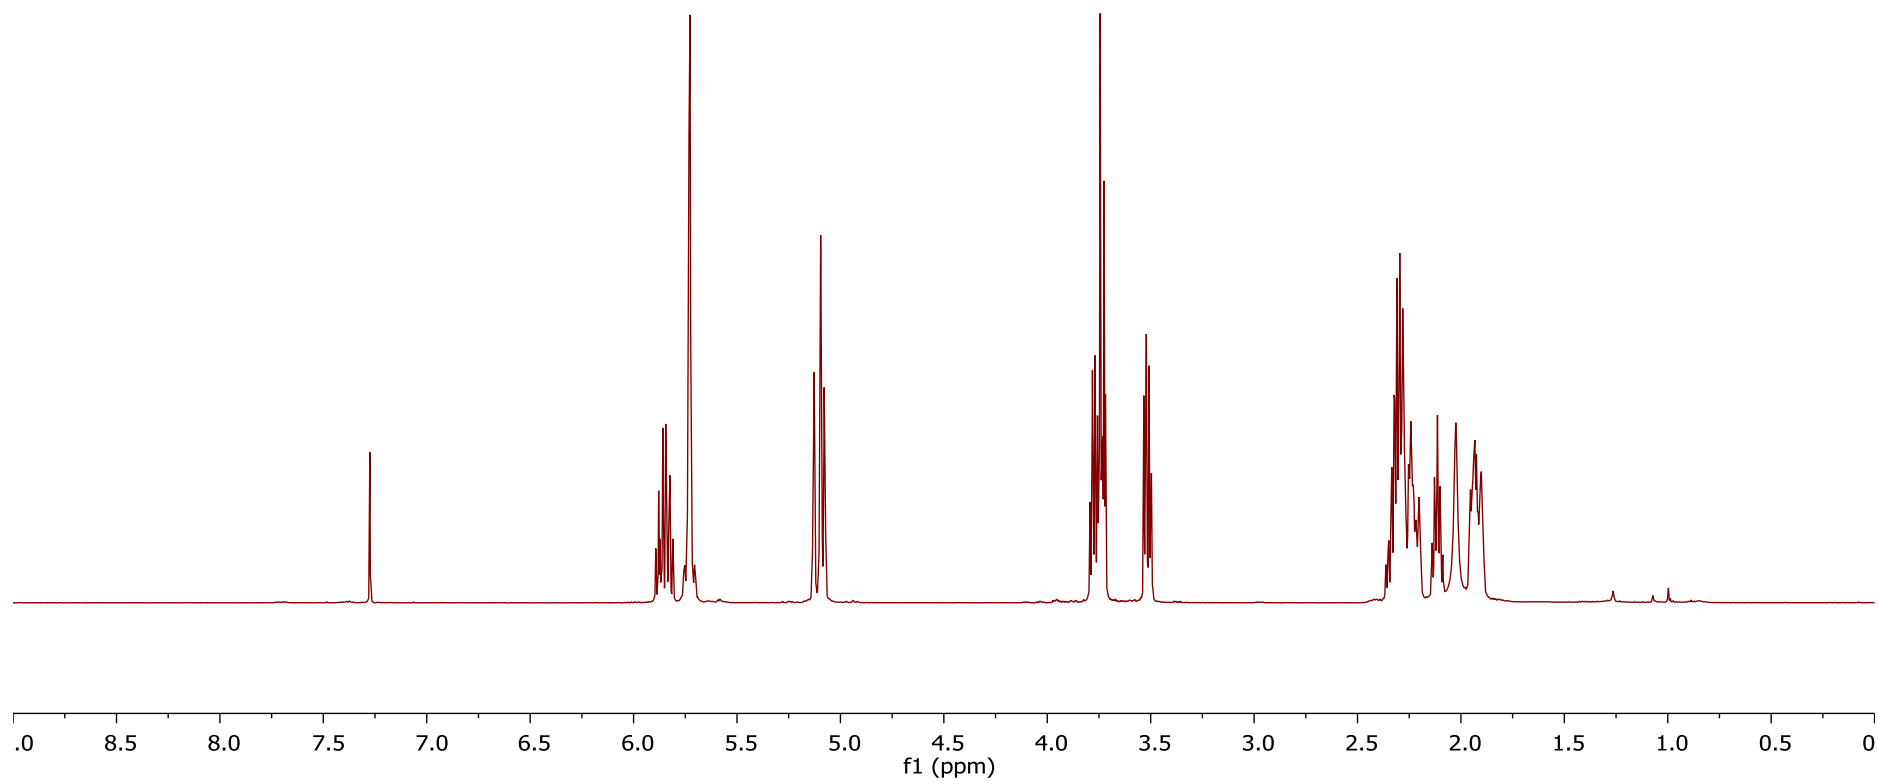

((1*S*,3*S*,3*aR*,7*aS*)-3-Allyl-1,3,3*a*,4,7,7*a*-hexahydroisobenzofuran-1-yl)methanol **14**

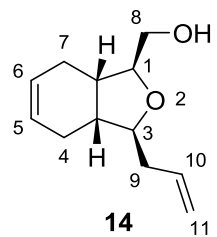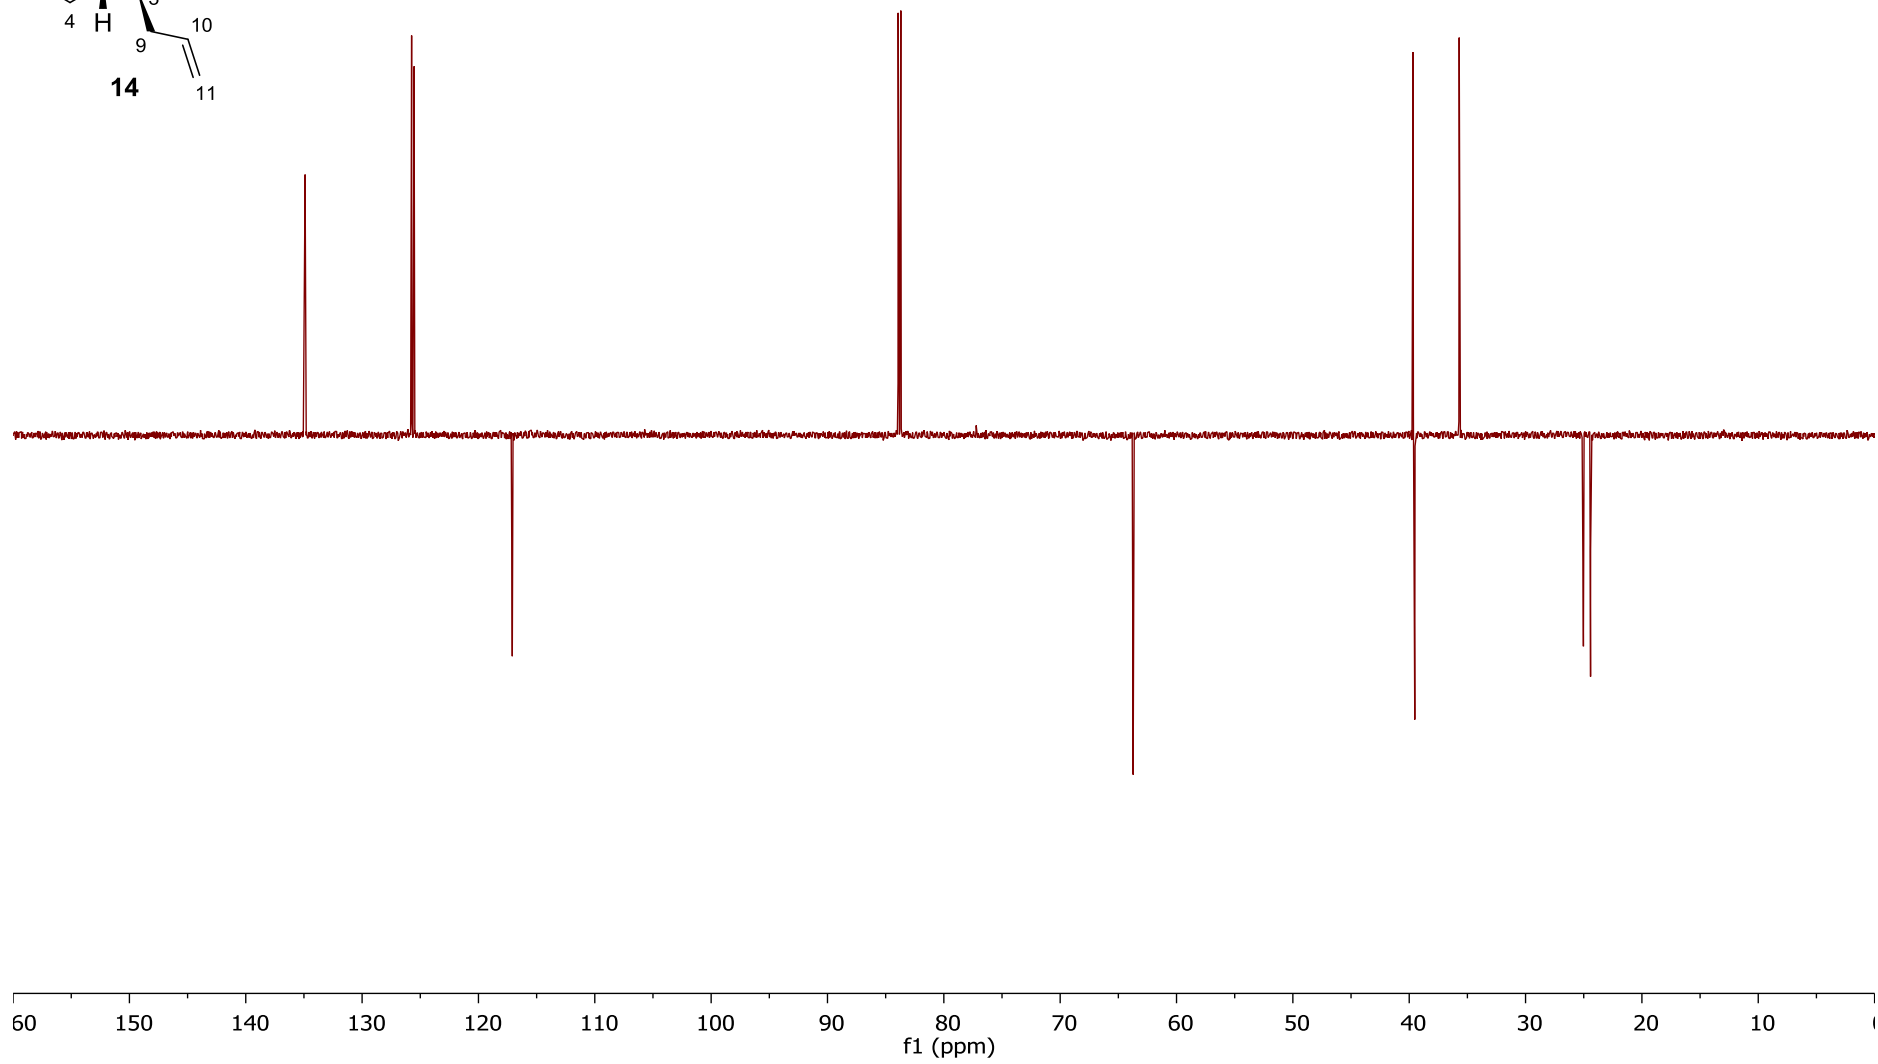

But-2'-enoic acid (1*S*, 3*S*, 3*aR*, 7*aS*)-allyl-1, 3, 3*a*, 4, 7, 7*a*-hexahydro-isobenzofuran-8-ylmethyl ester **15**

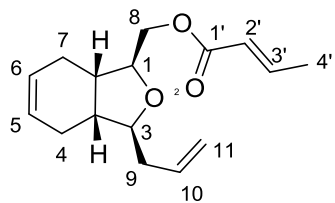

**15**

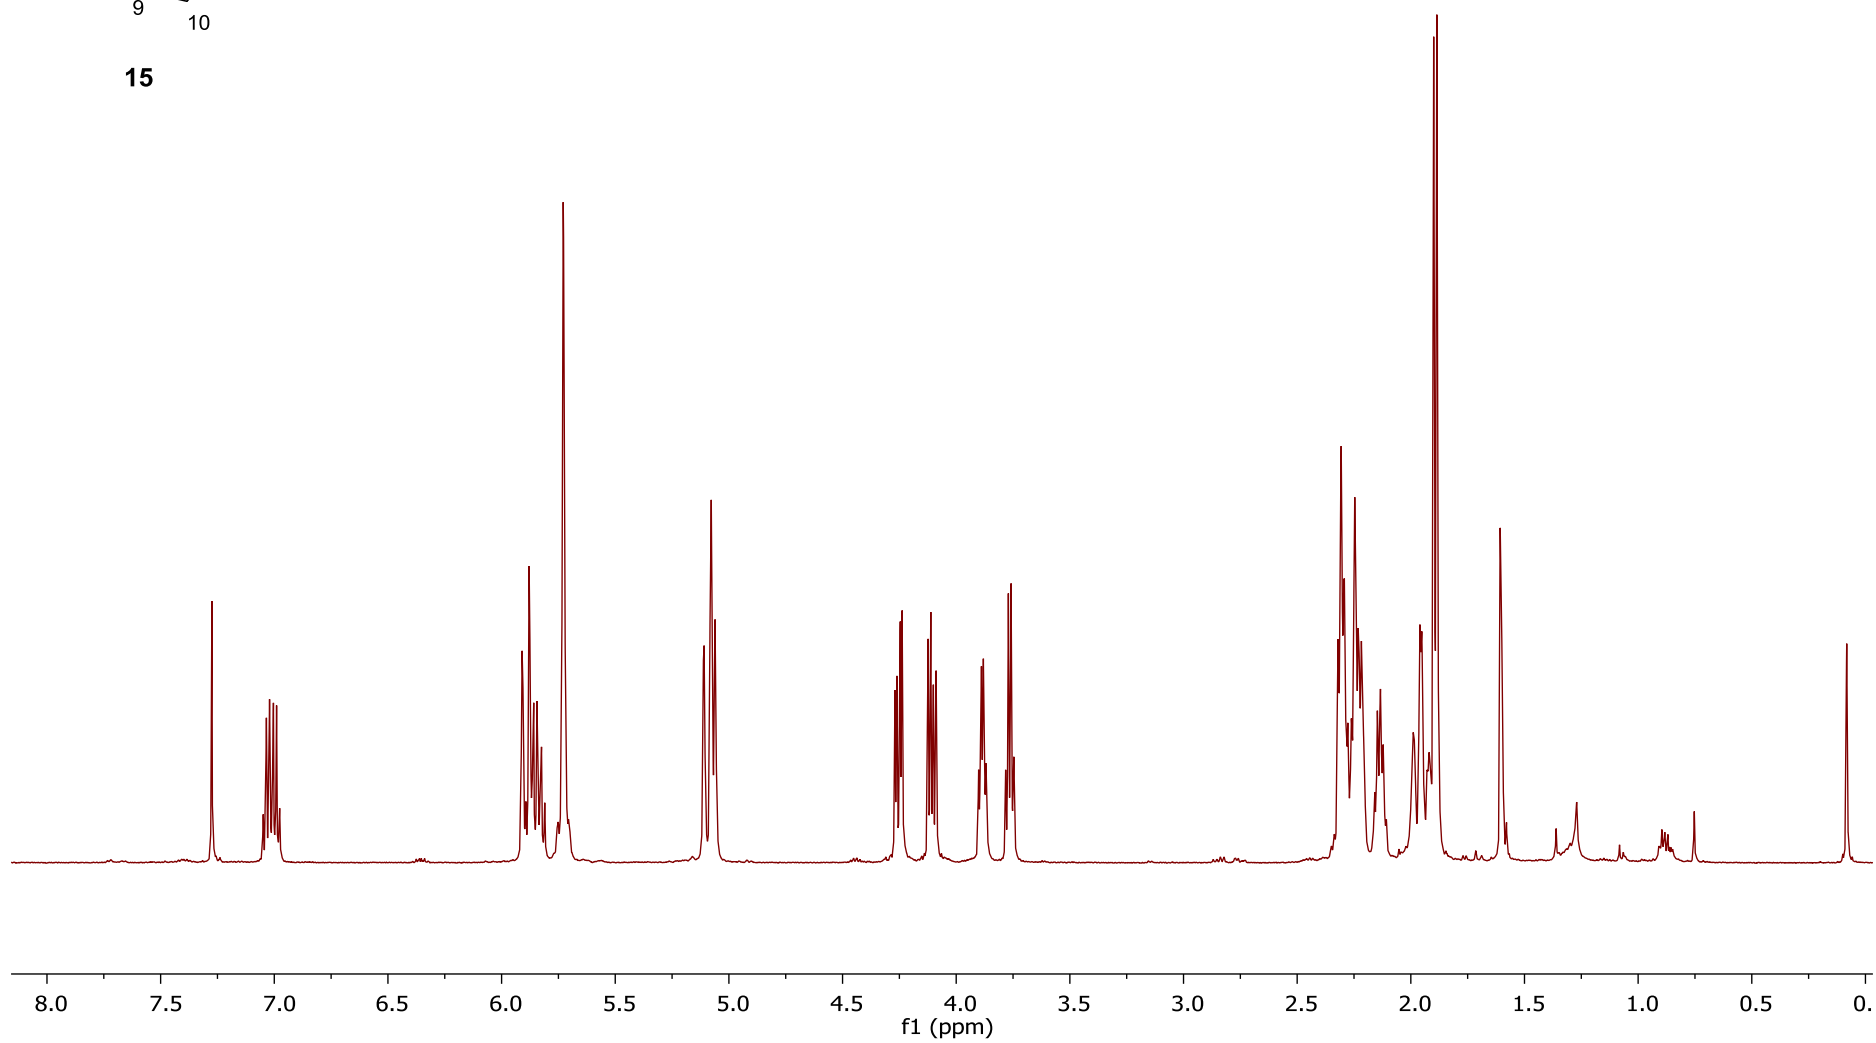

But-2'-enoic acid (1*S*, 3*S*, 3*aR*, 7*aS*)-allyl-1, 3, 3*a*, 4, 7, 7*a*-hexahydro-isobenzofuran-8-ylmethyl ester **15**

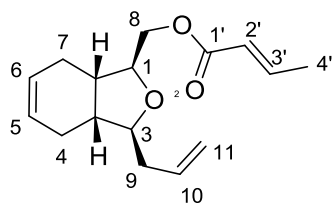

**15**

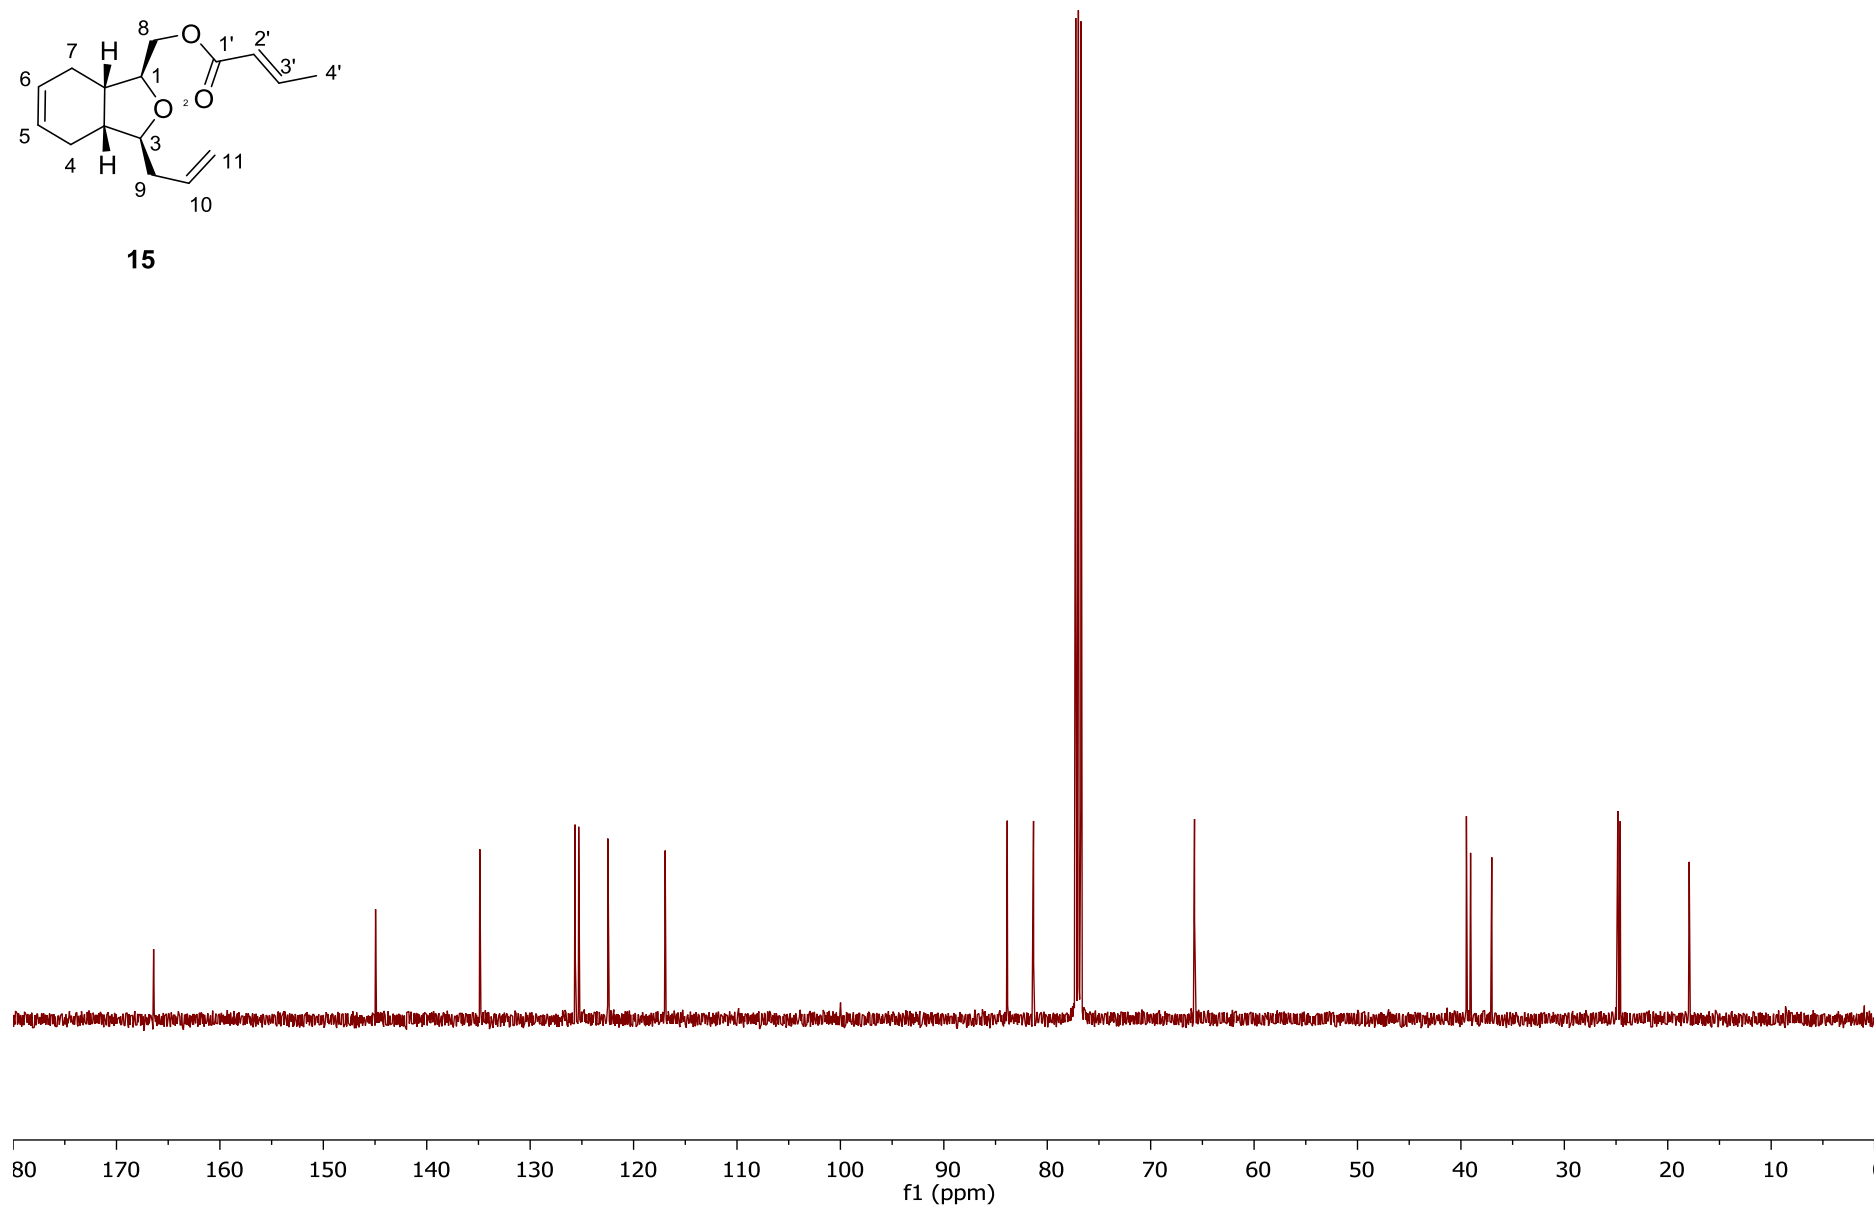

((1*S*,3*S*,3*aR*,7*aS*)-3-Allyl-1,3,3*a*,4,7,7*a*-hexahydroisobenzofuran-1-yl)methyl but-3'-enoate **16**

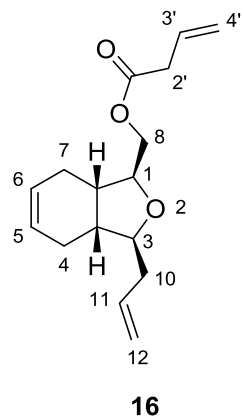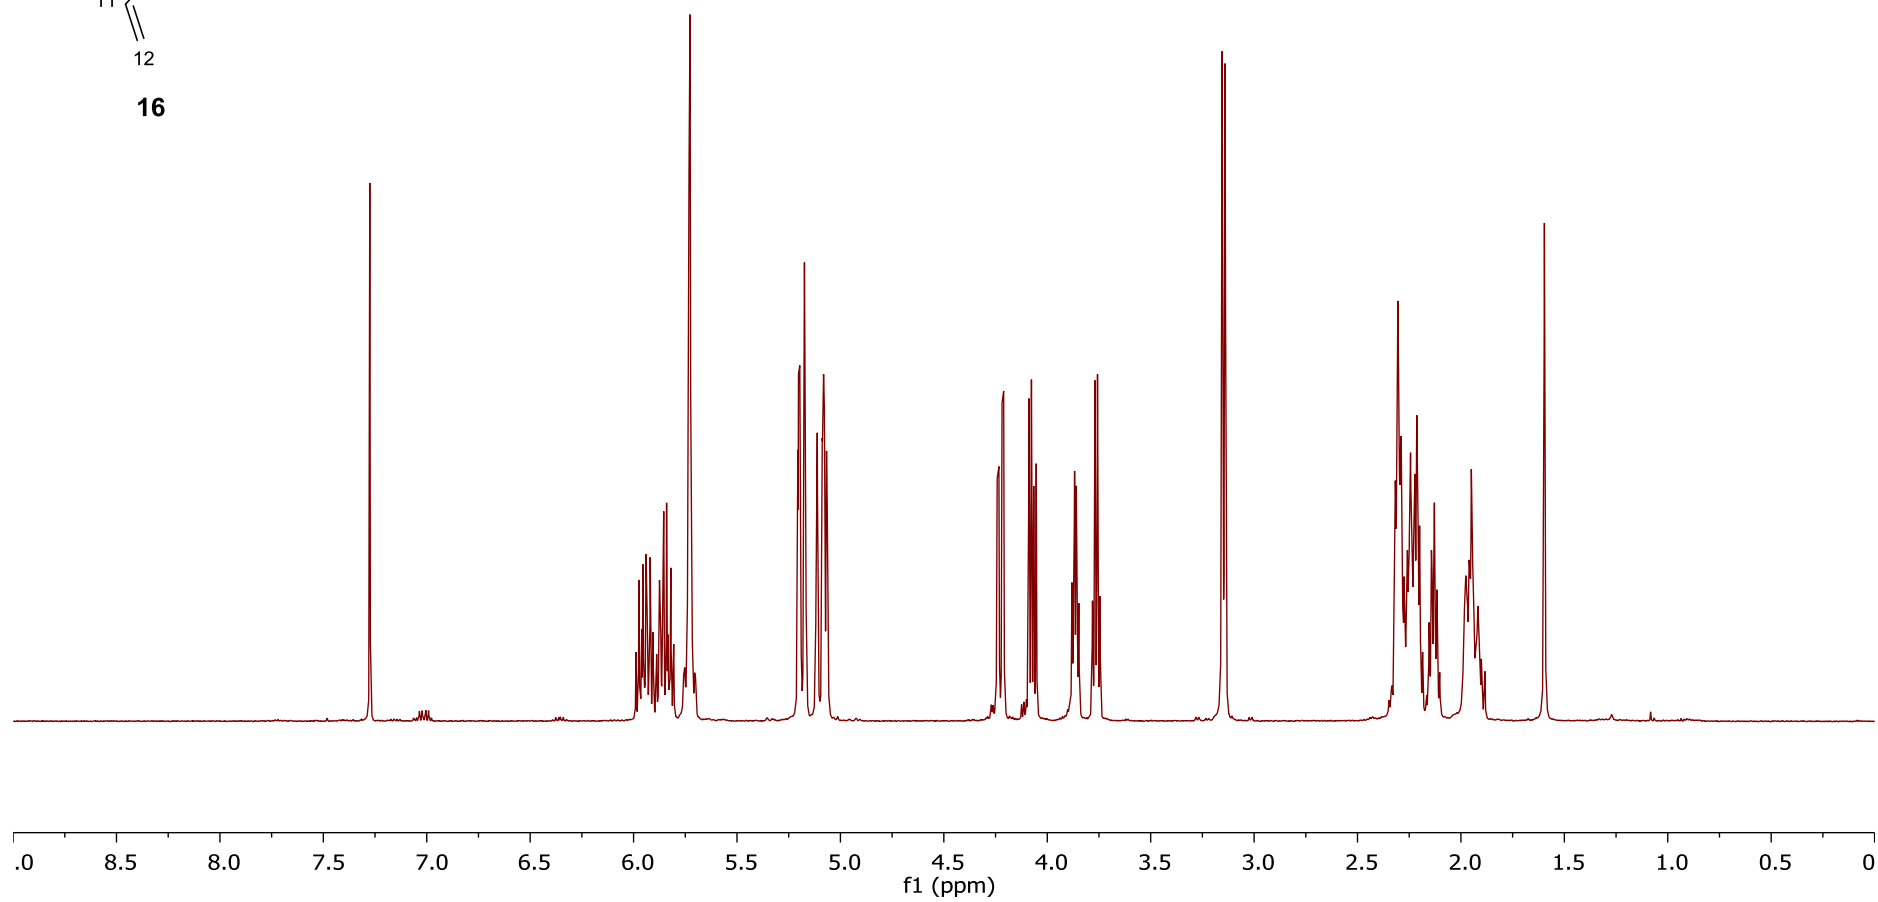

**((1*S*,3*S*,3*aR*,7*aS*)-3-Allyl-1,3,3*a*,4,7,7*a*-hexahydroisobenzofuran-1-yl)methyl but-3'-enoate **16****

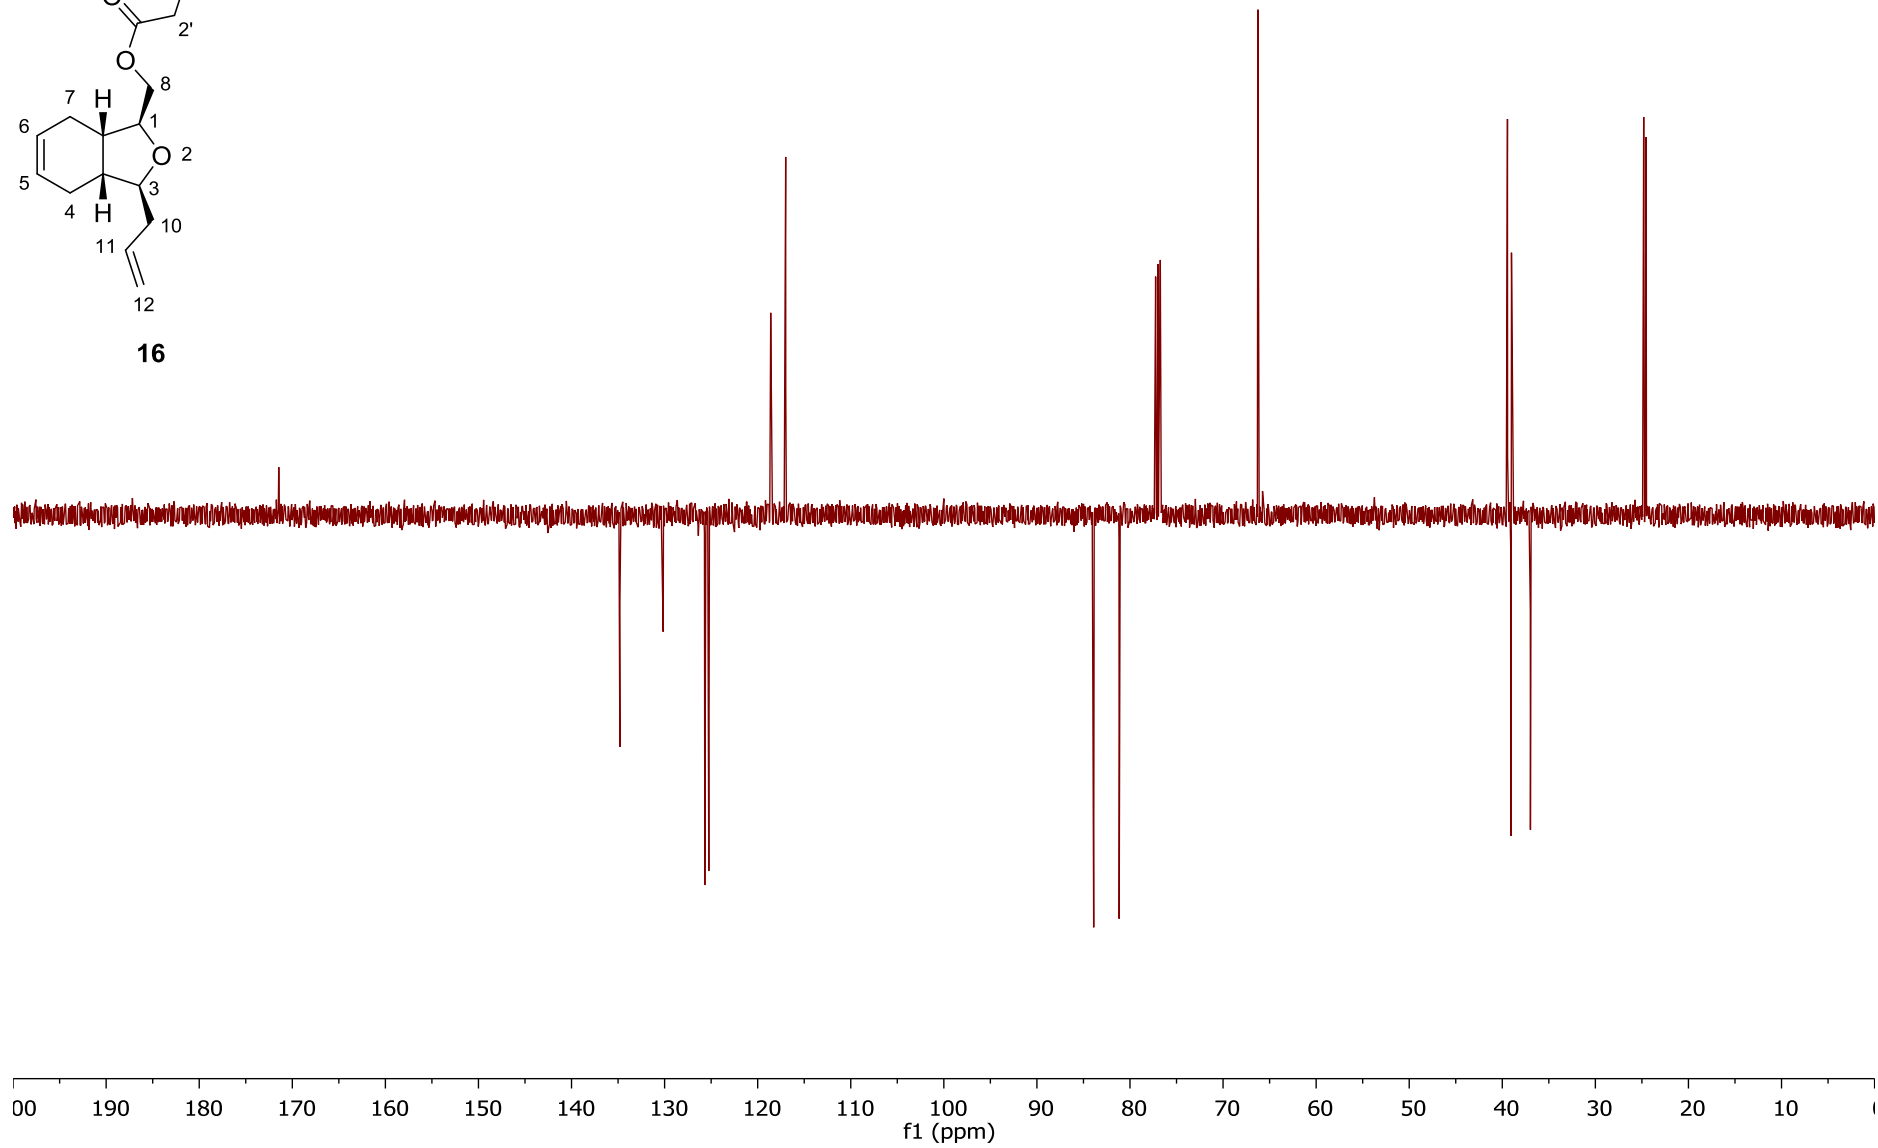



Pent-4'enoic acid (1*S*, 3*S*, 3*aR*, 7*aS*)-allyl-1, 3, 3*a*, 4, 7, 7*a*-hexahydro-isobenzofuran-8-ylmethyl ester **17**

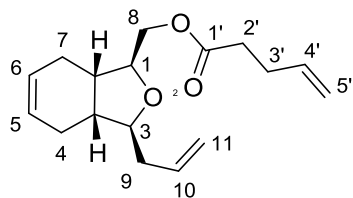

**17**

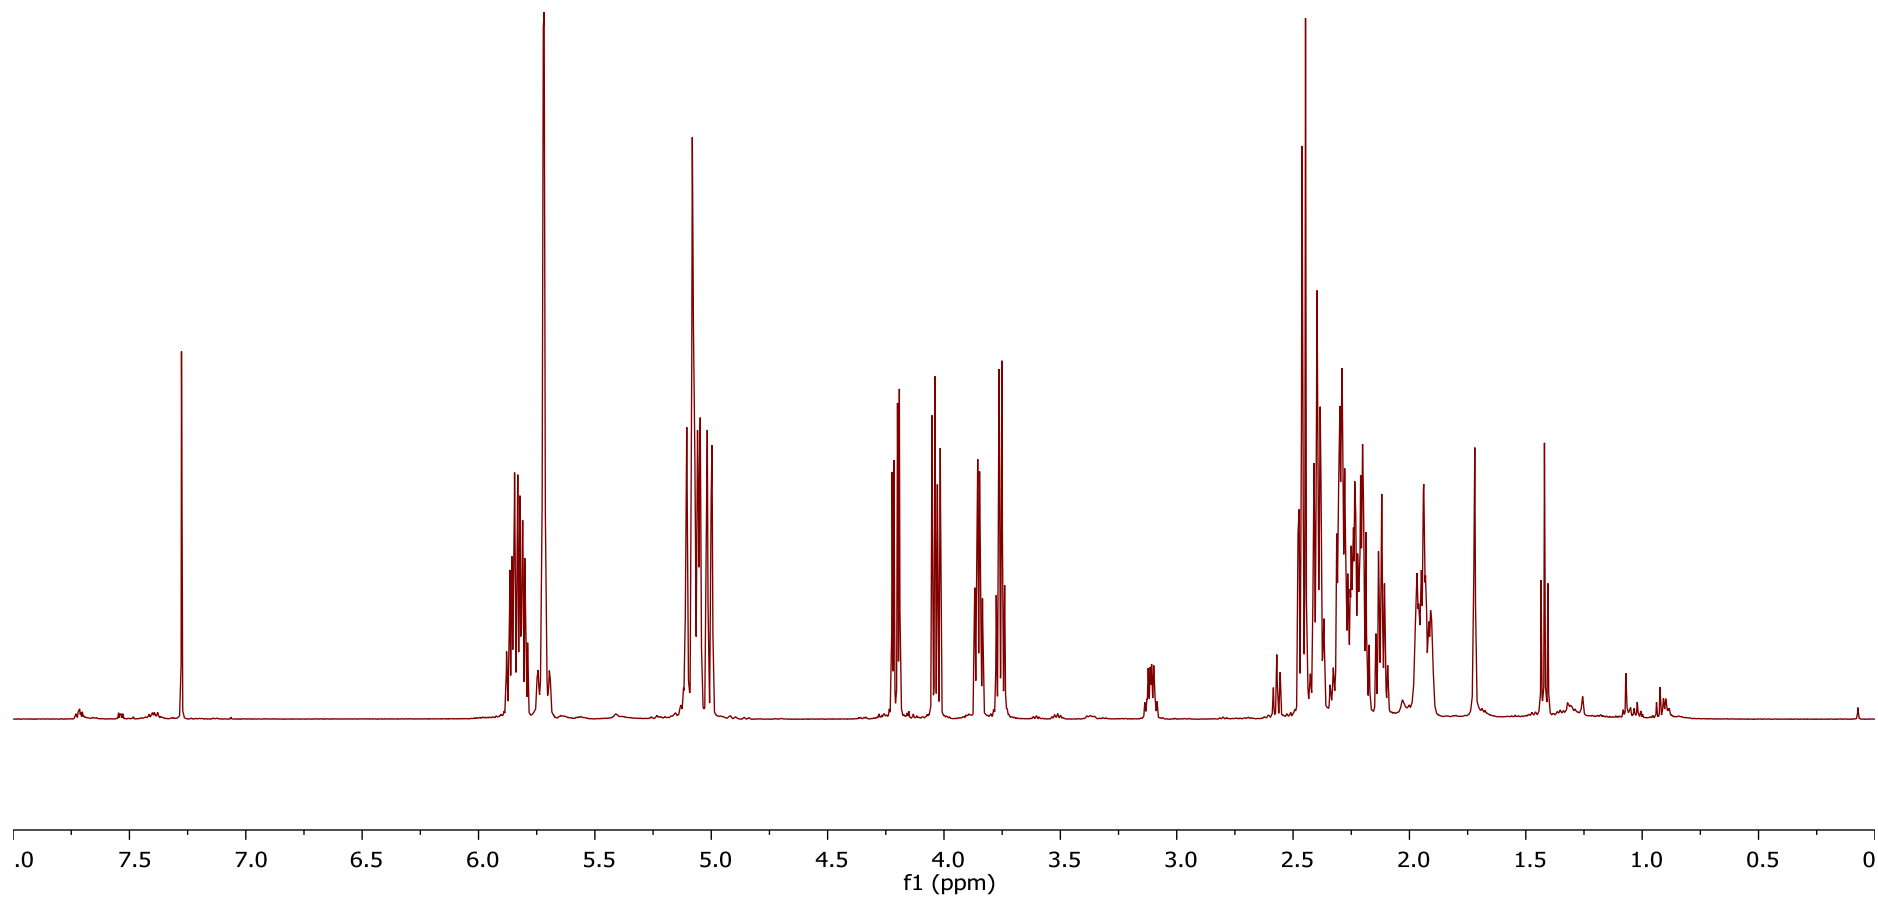

Pent-4'enoic acid (1*S*, 3*S*, 3*aR*, 7*aS*)-allyl-1, 3, 3*a*, 4, 7, 7*a*-hexahydro-isobenzofuran-8-ylmethyl ester **17**

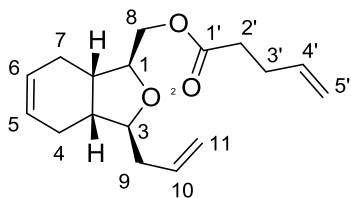

**17**

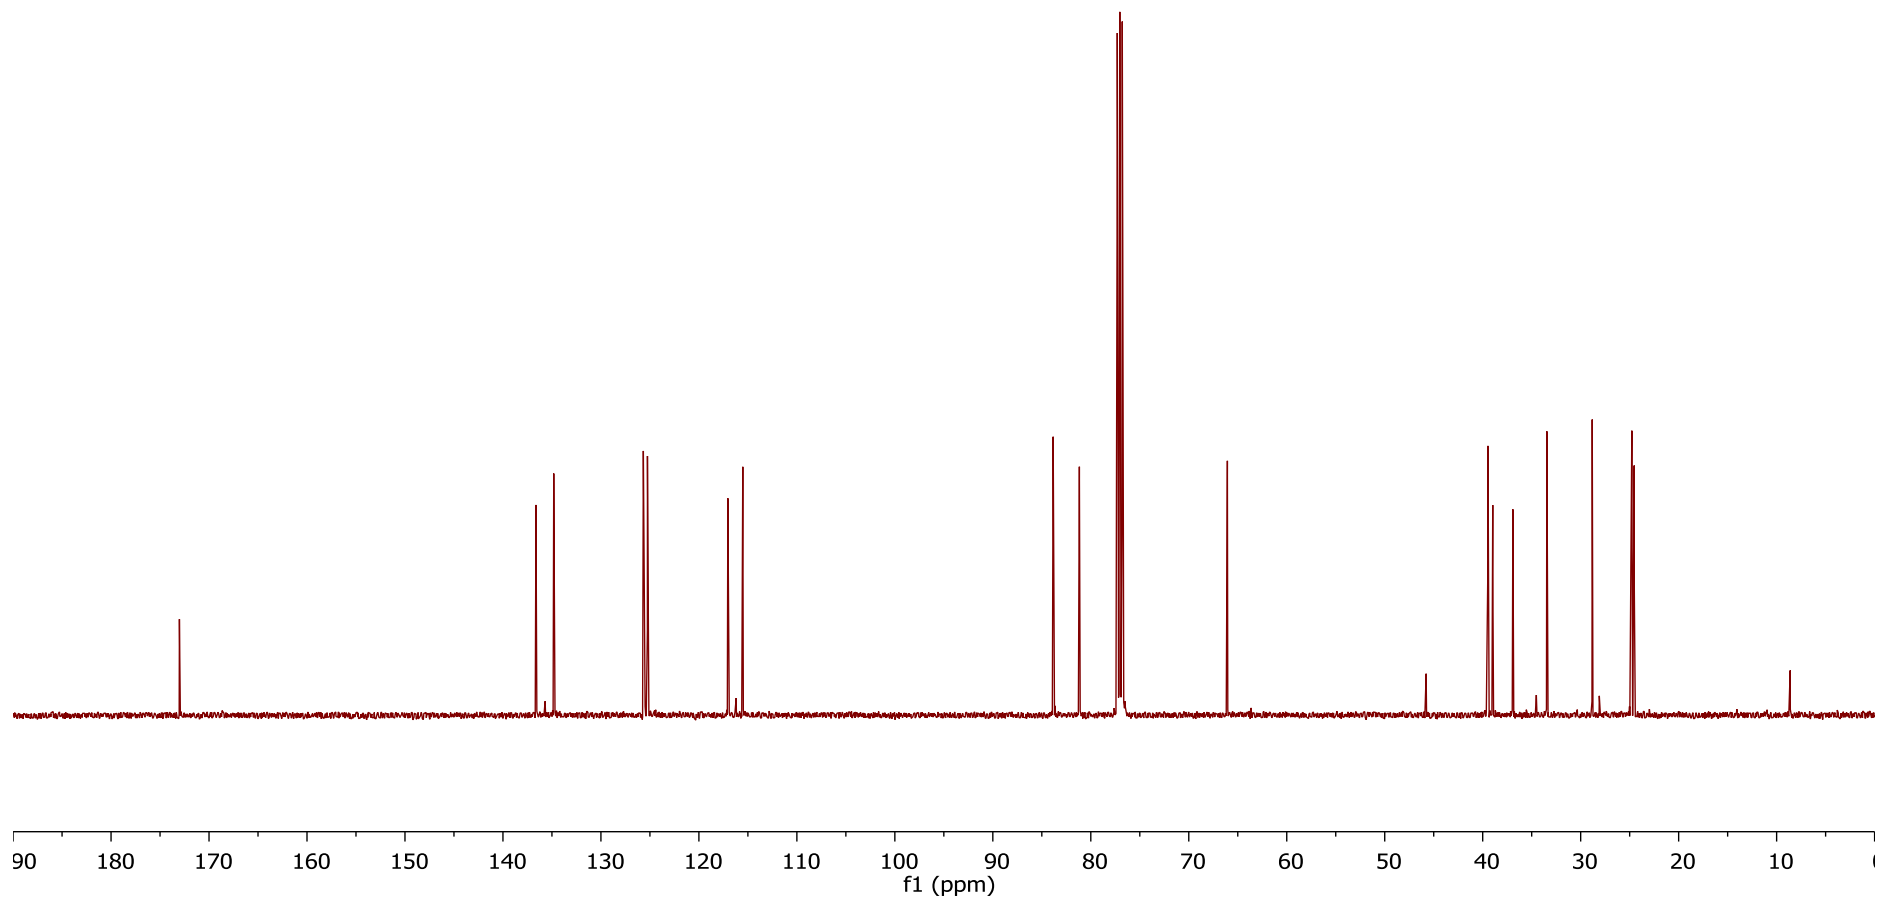

((1*S*,3*S*,3*aR*,7*aS*)-3-Allyl-1,3,3*a*,4,7,7*a*-hexahydroisobenzofuran-1-yl)methyl hex-5-enoate **18**

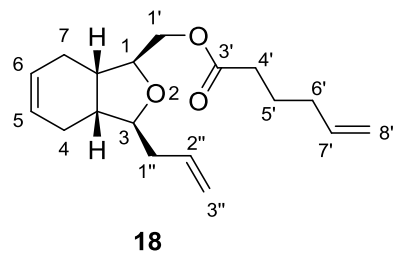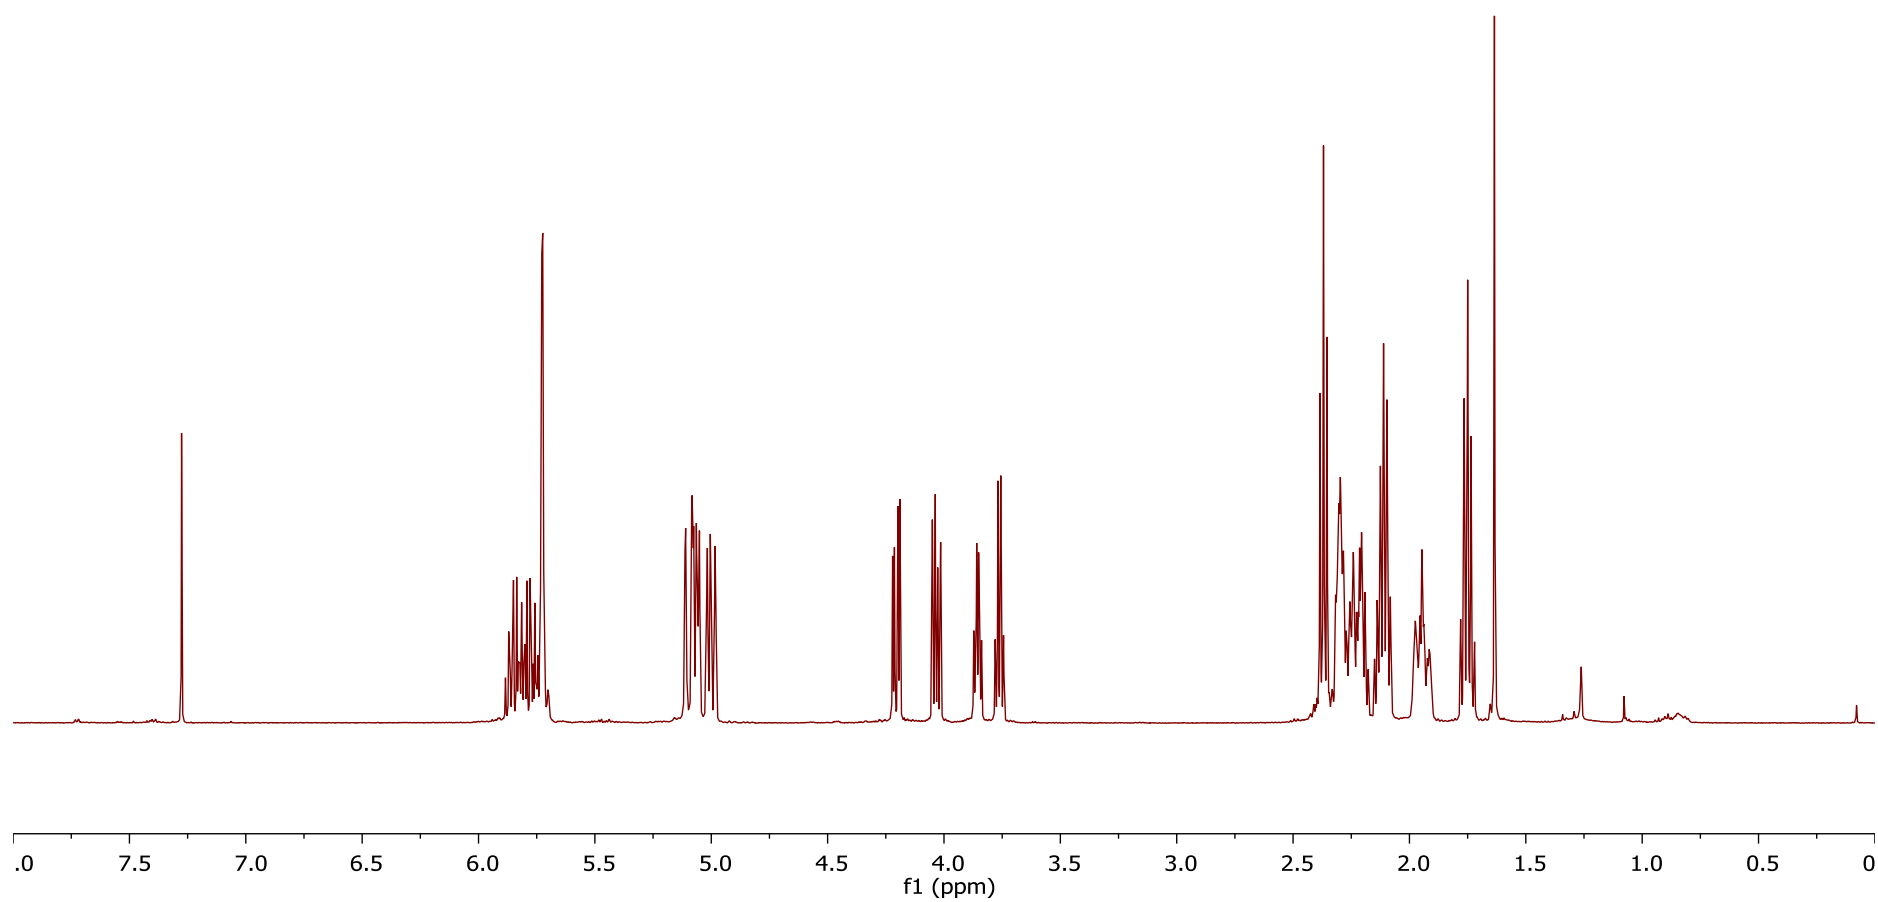

((1S,3S,3aR,7aS)-3-Allyl-1,3,3a,4,7,7a-hexahydroisobenzofuran-1-yl)methyl hex-5-enoate **18**

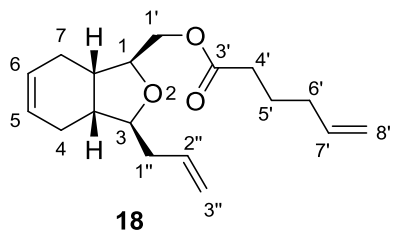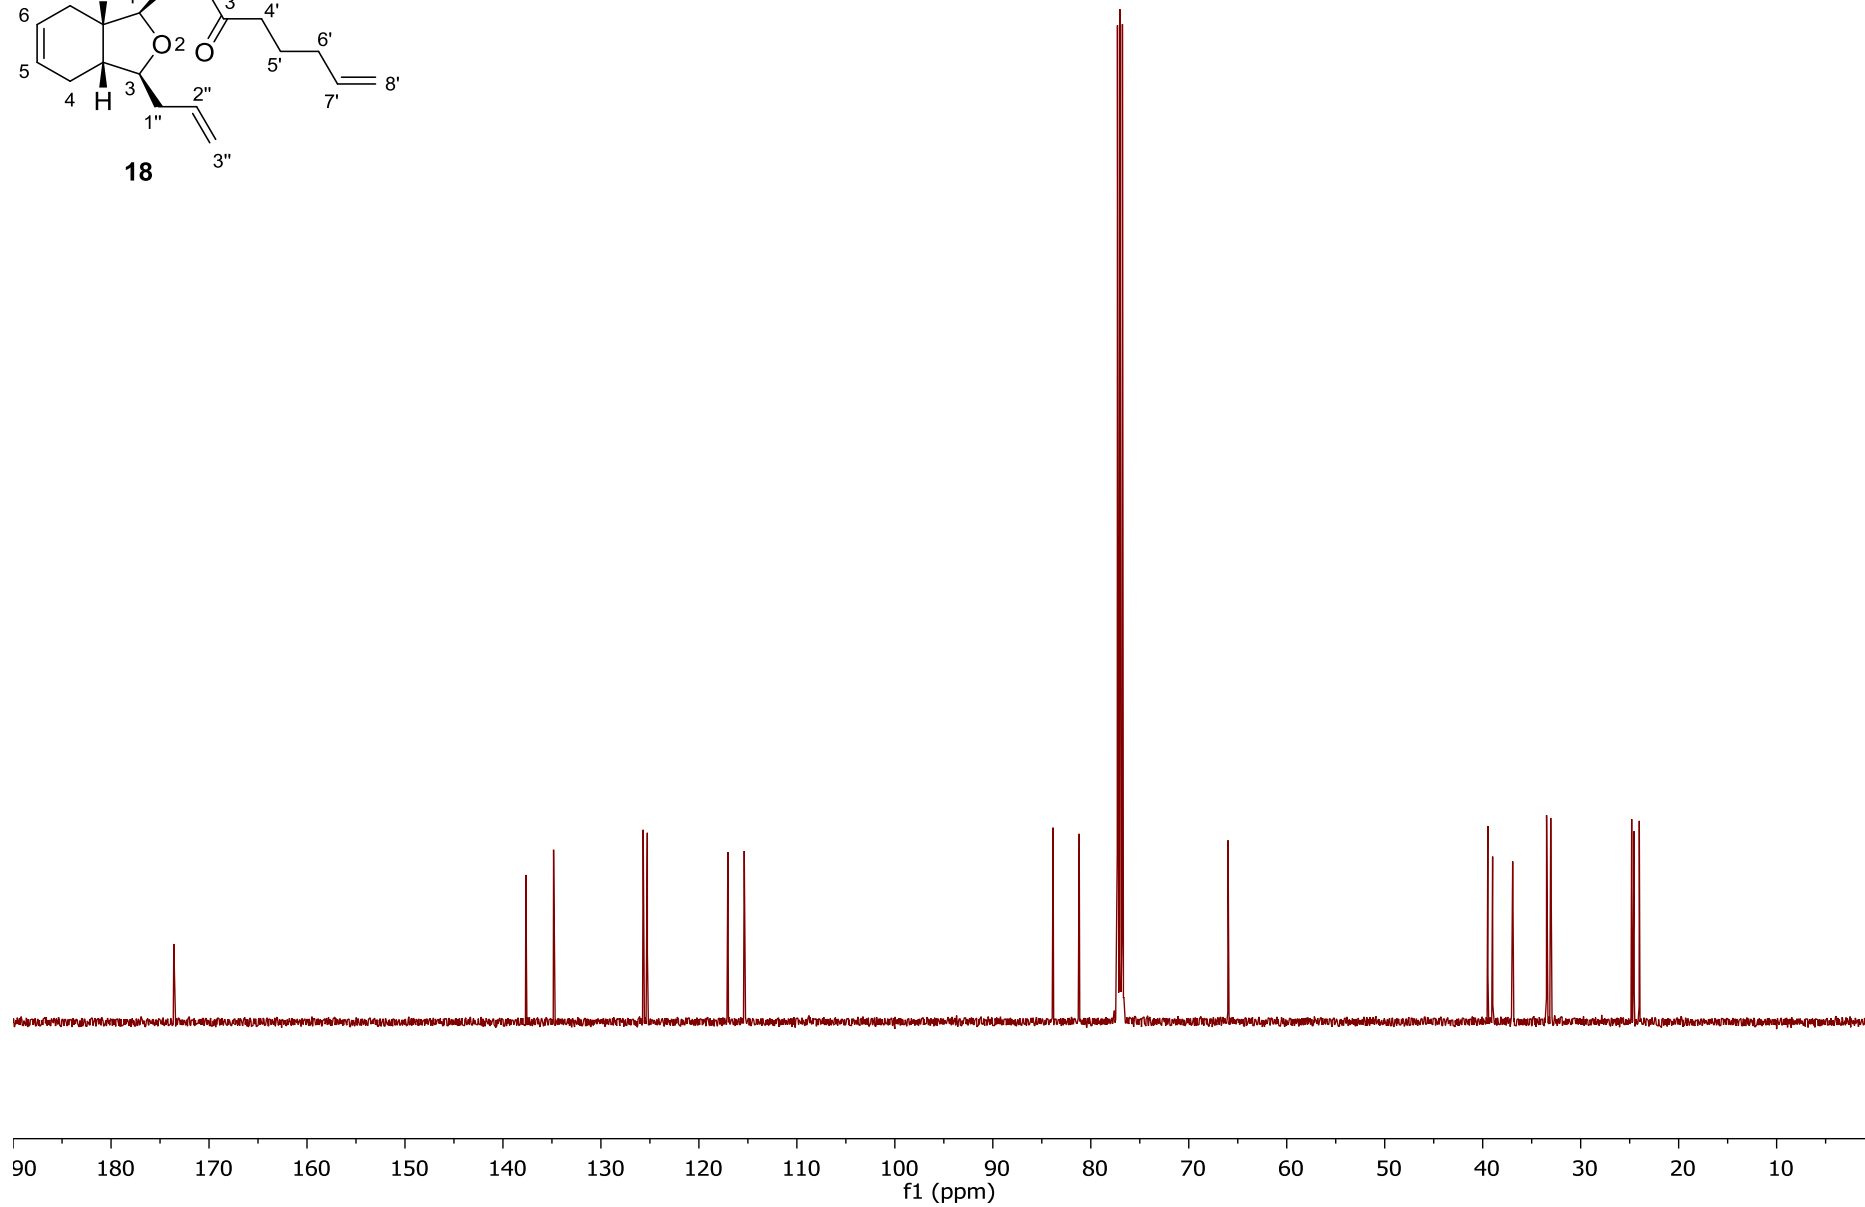

(Z)-(1S, 9S, 10R, 15S)-3, 16-Dioxa-tricyclo[7.6.1.0<sup>10,15</sup>]hexadeca-6,12-diene-4-one **20**

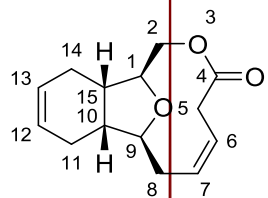

**20**

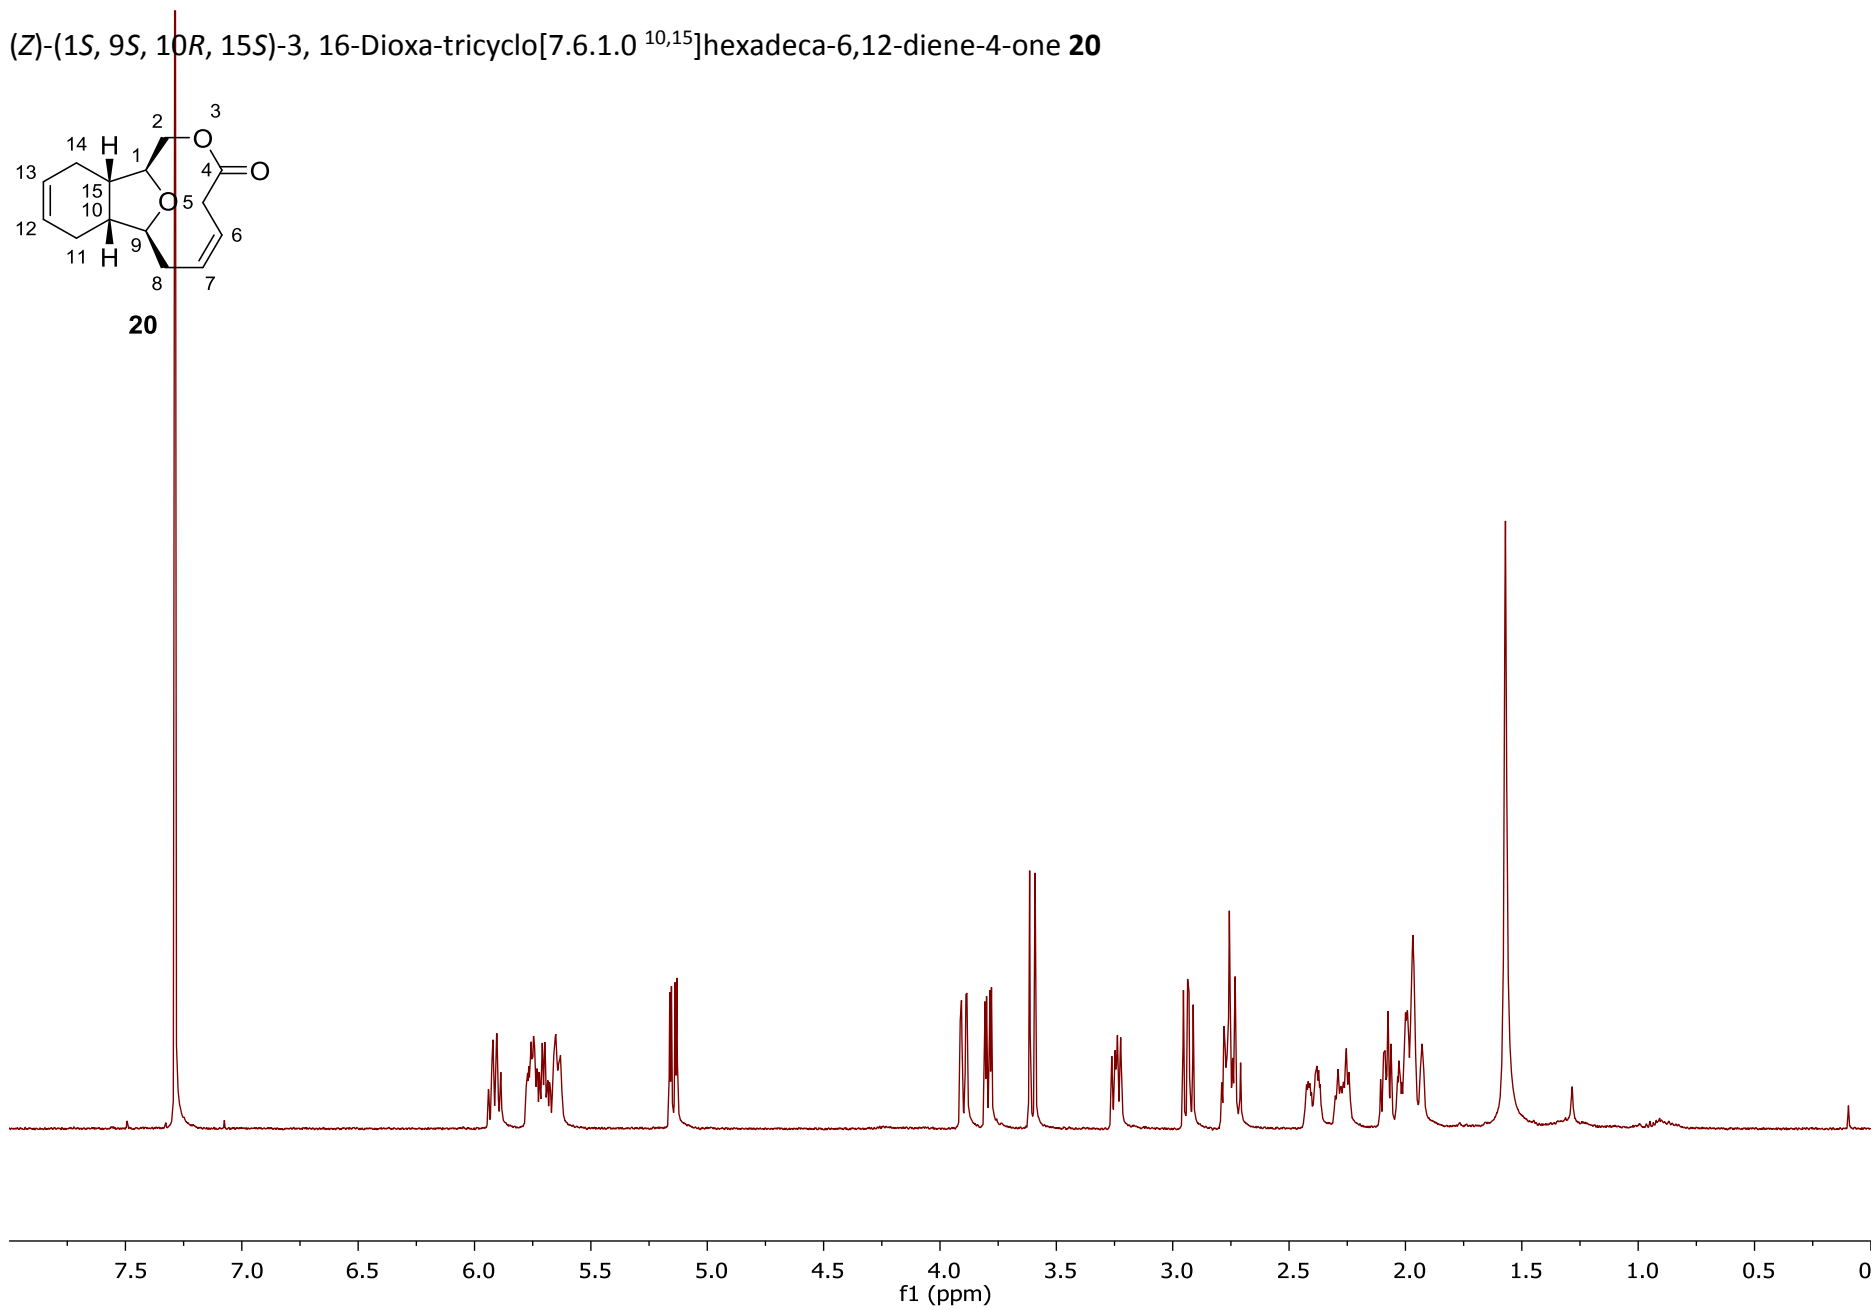

(Z)-(1S, 9S, 10R, 15S)-3, 16-Dioxa-tricyclo[7.6.1.0<sup>10,15</sup>]hexadeca-6,12-diene-4-one **20**

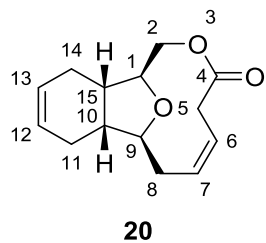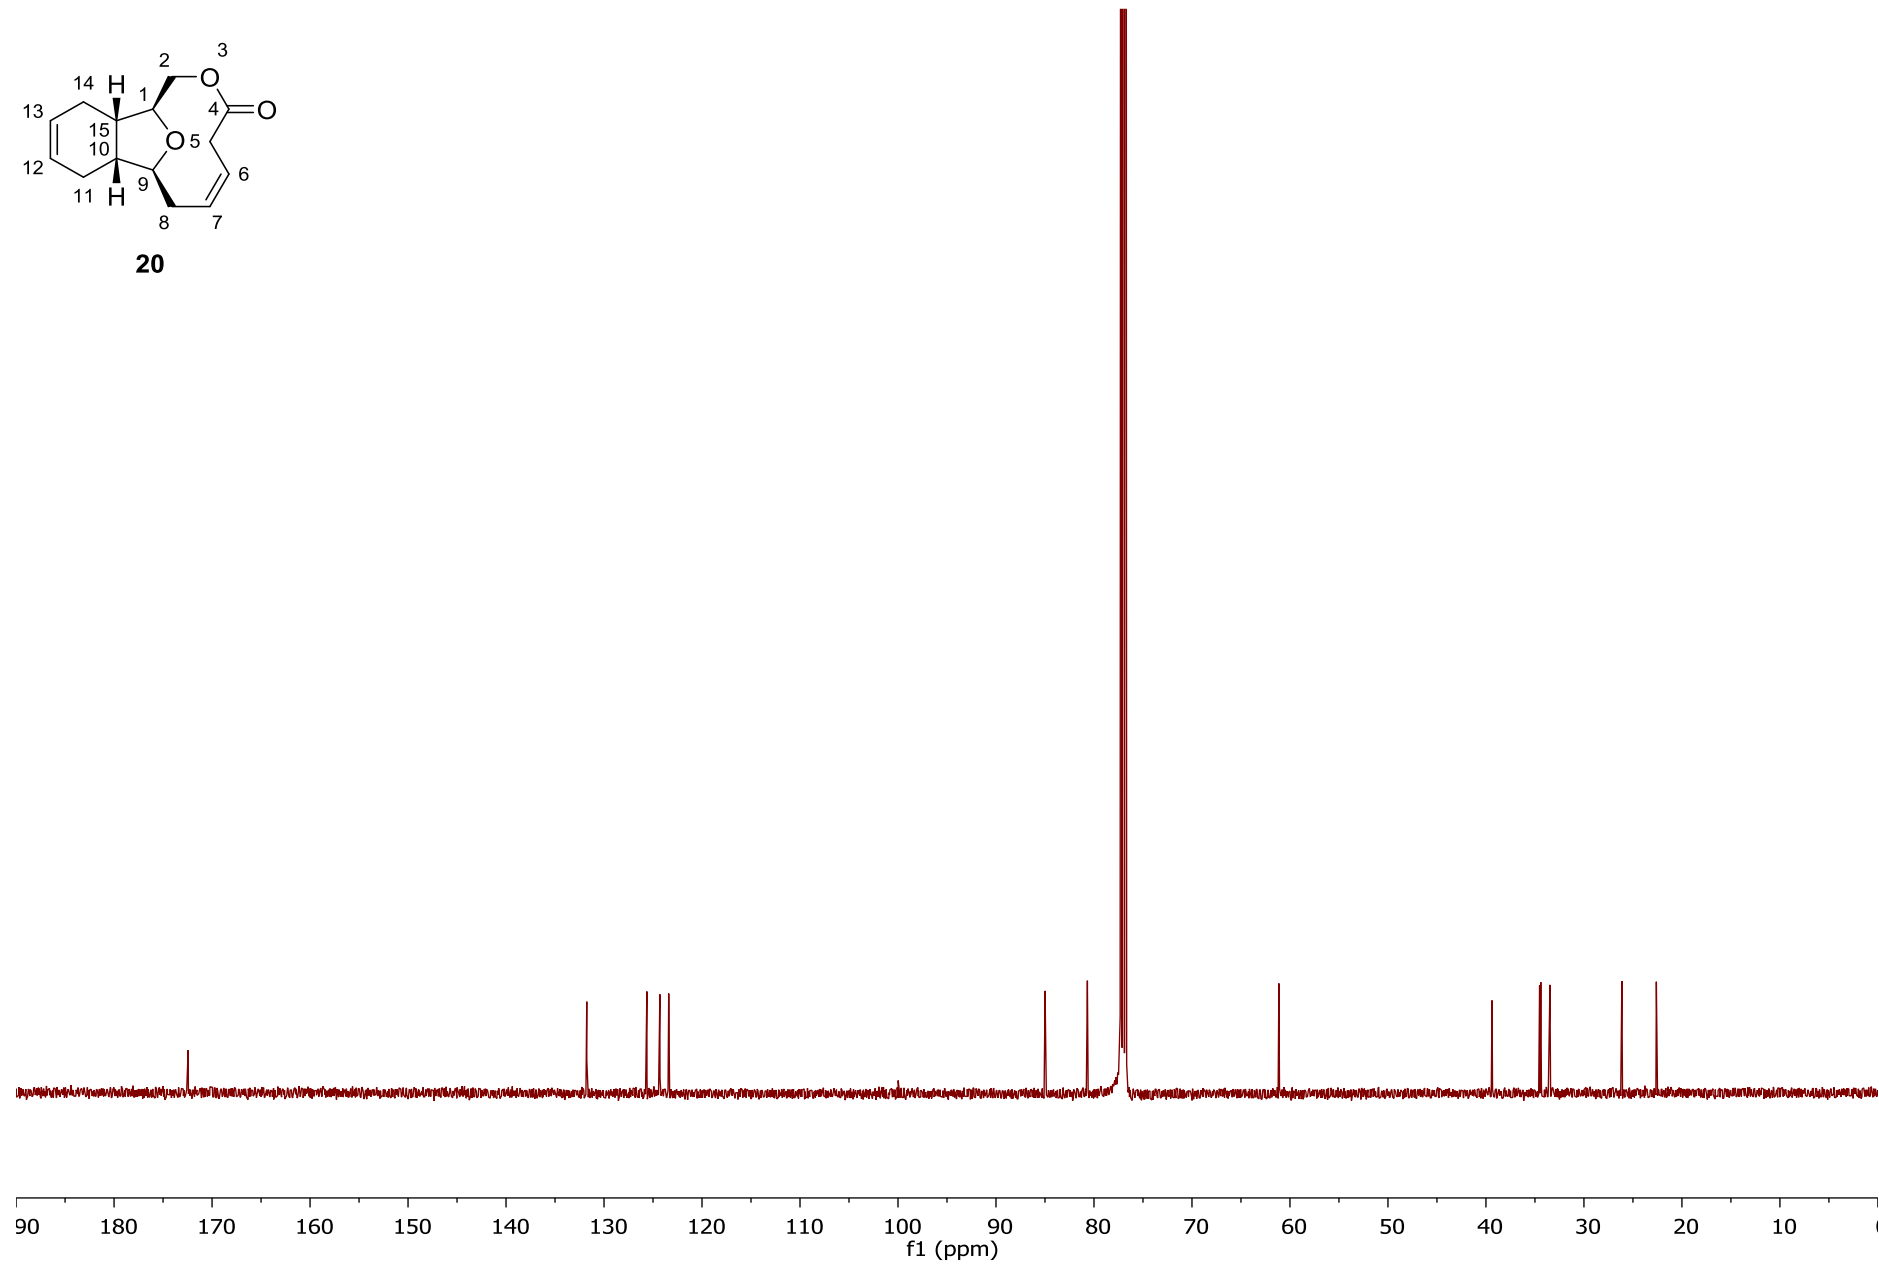

(Z)-(1S,10S,11R,16S)-3,17-Dioxa-tricyclo[8.6.1.0<sup>11,16</sup>]heptadeca-7,13-diene-4-one **21**

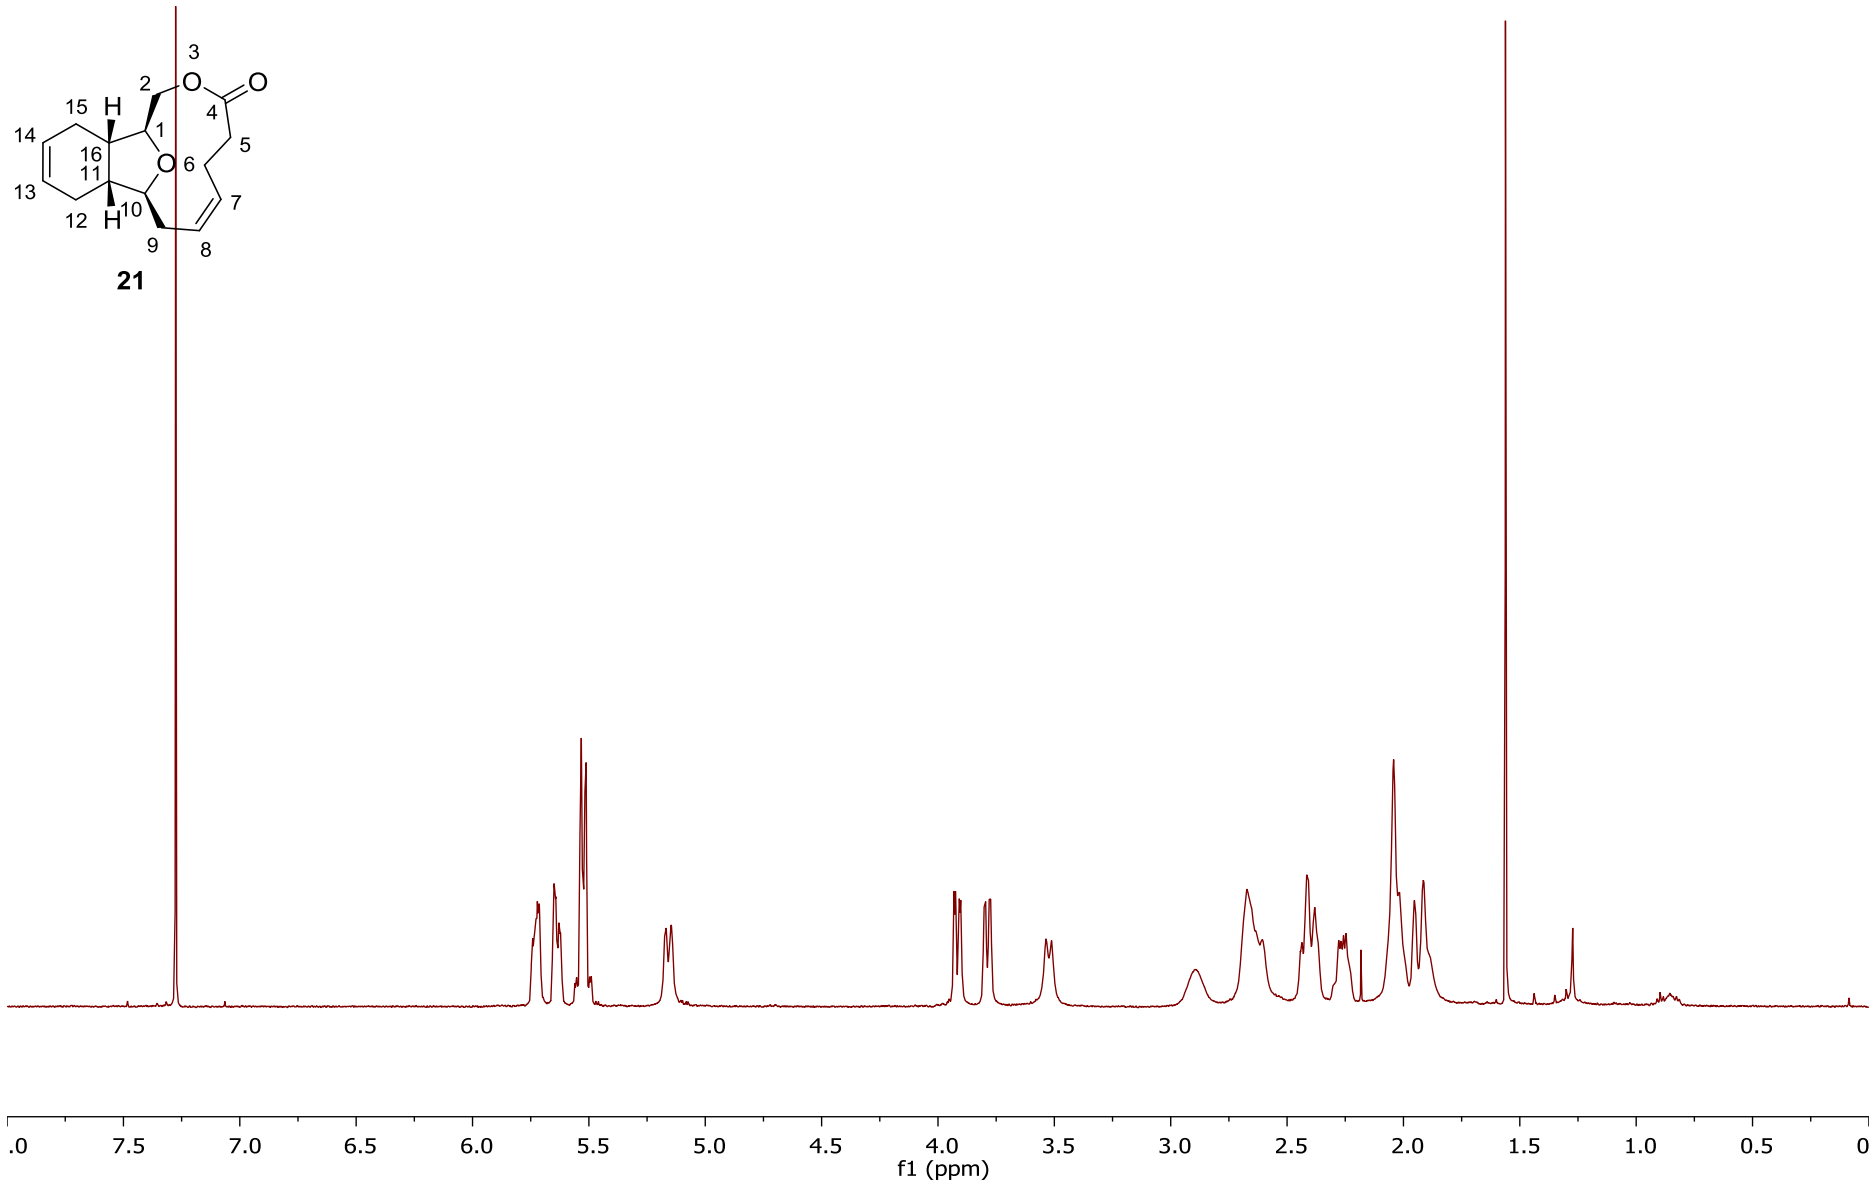

(Z)-(1*S*,10*S*,11*R*,16*S*)-3,17-Dioxa-tricyclo[8.6.1.0<sup>11,16</sup>]heptadeca-7,13-diene-4-one **21** acetone contaminant

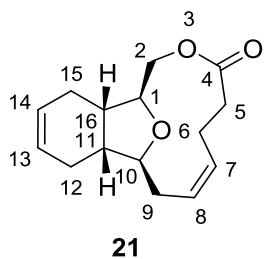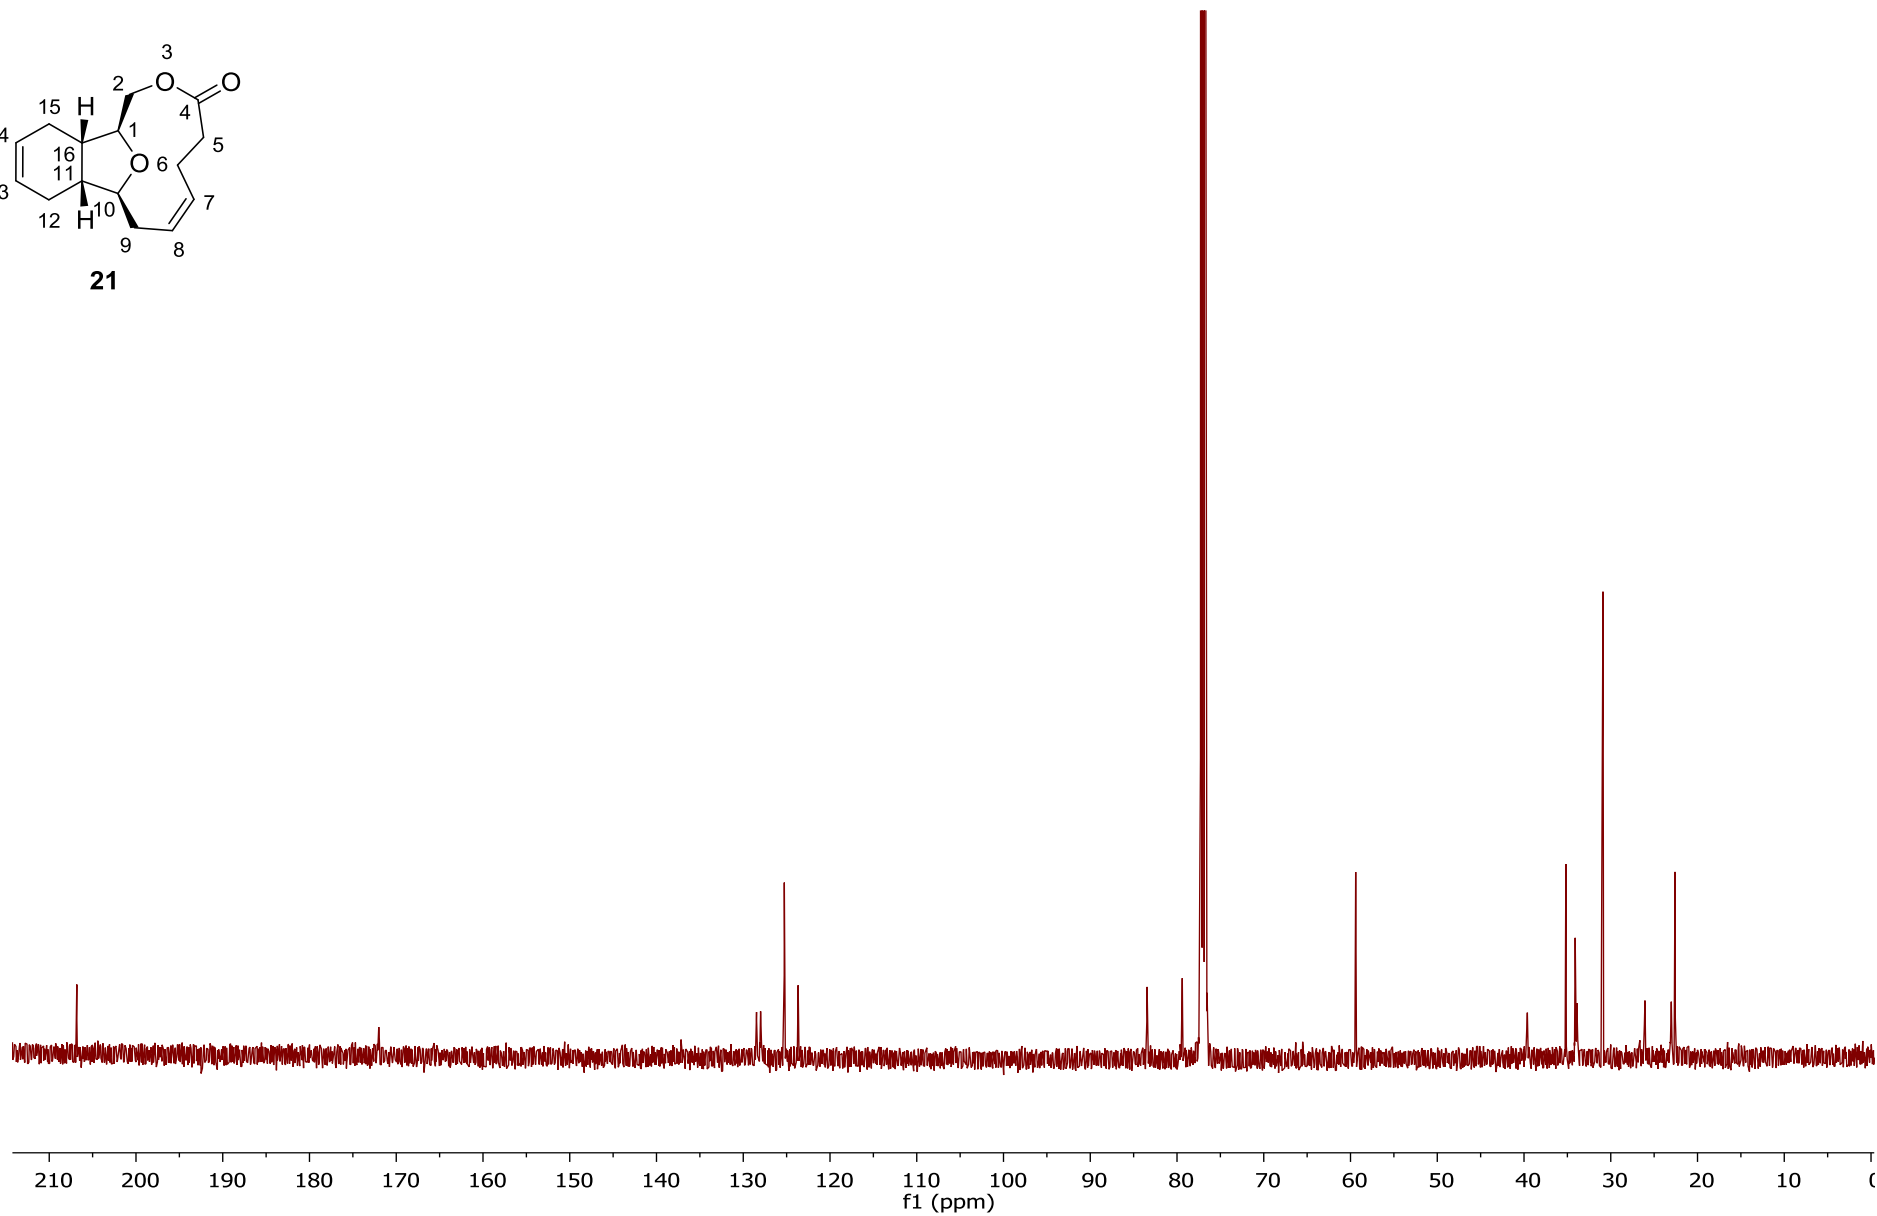



(Z)-(1S,11S,12R,17S)-3,18-Dioxatricyclo[9.6.1.0<sup>12,17</sup>]octadeca-8,14-dien-4-one **22**

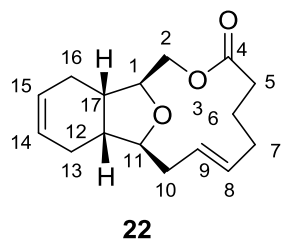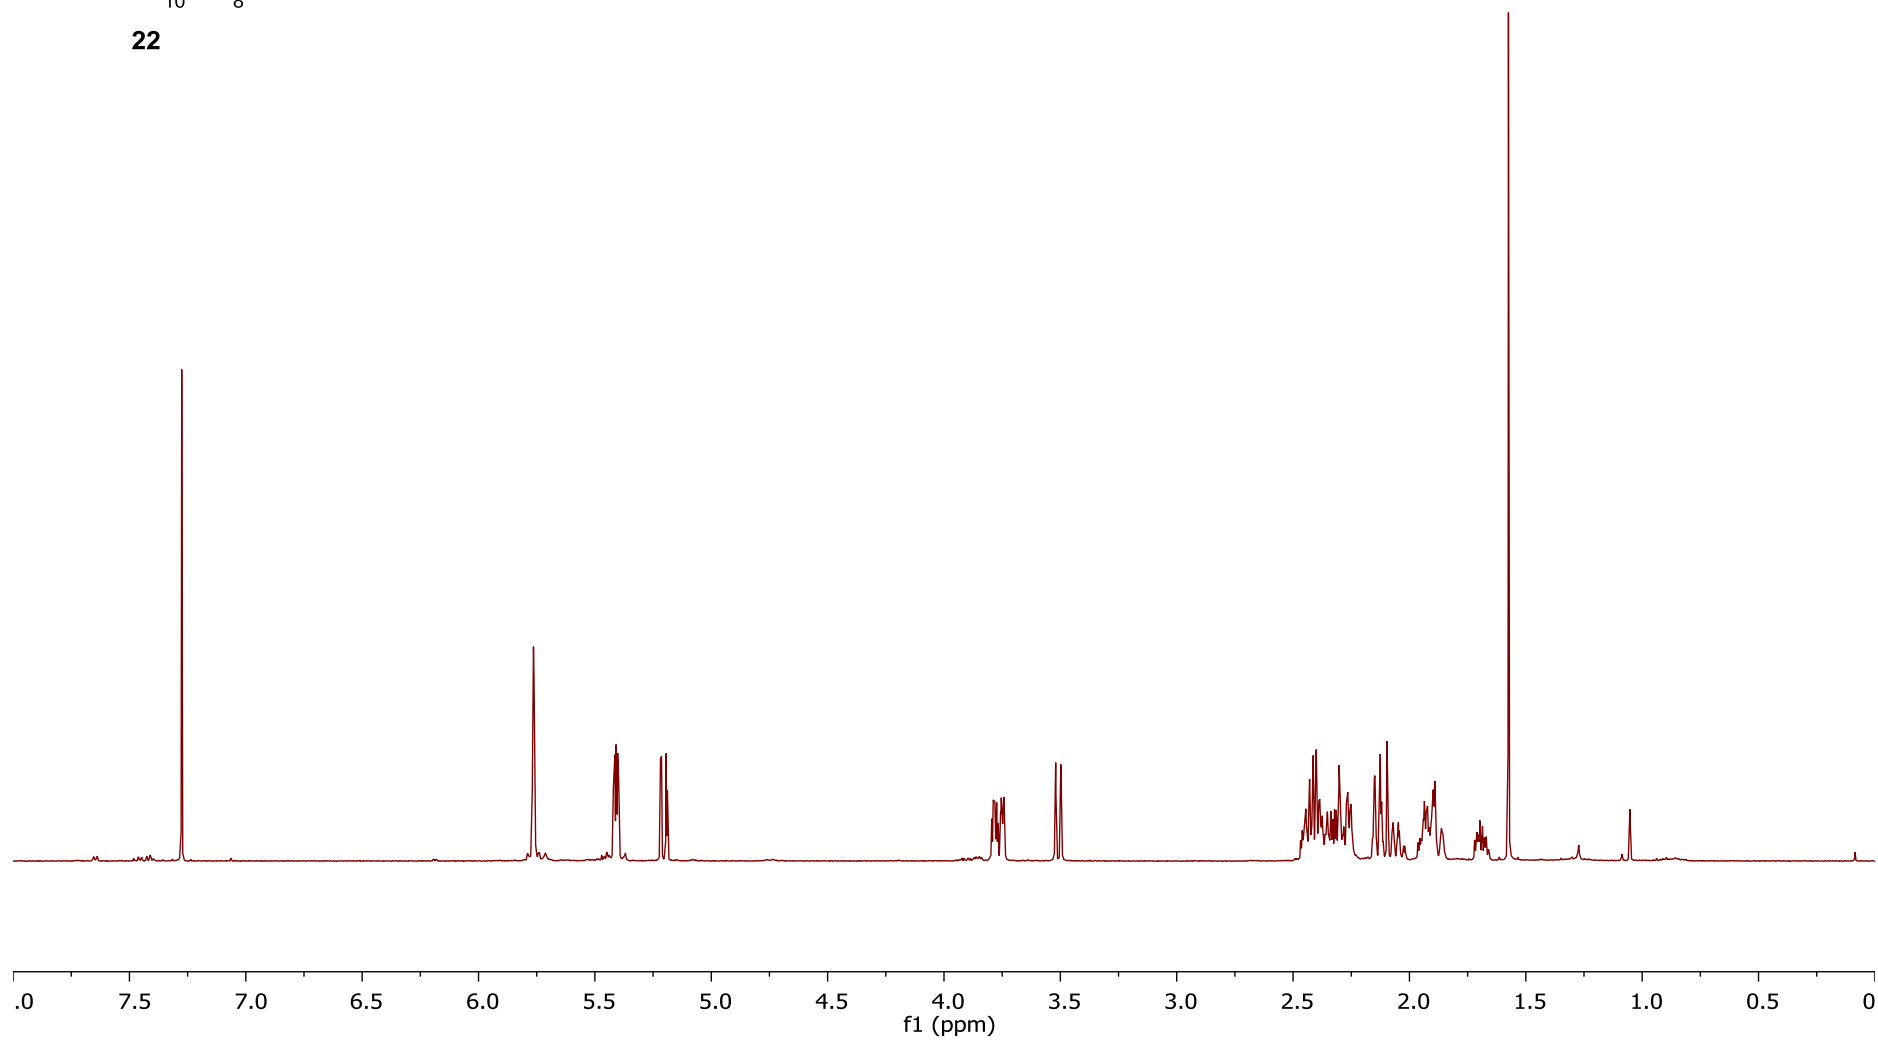

(Z)-(1S,11S,12R,17S)-3,18-Dioxatricyclo[9.6.1.0<sup>12,17</sup>]octadeca-8,14-dien-4-one **22**

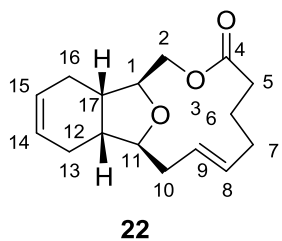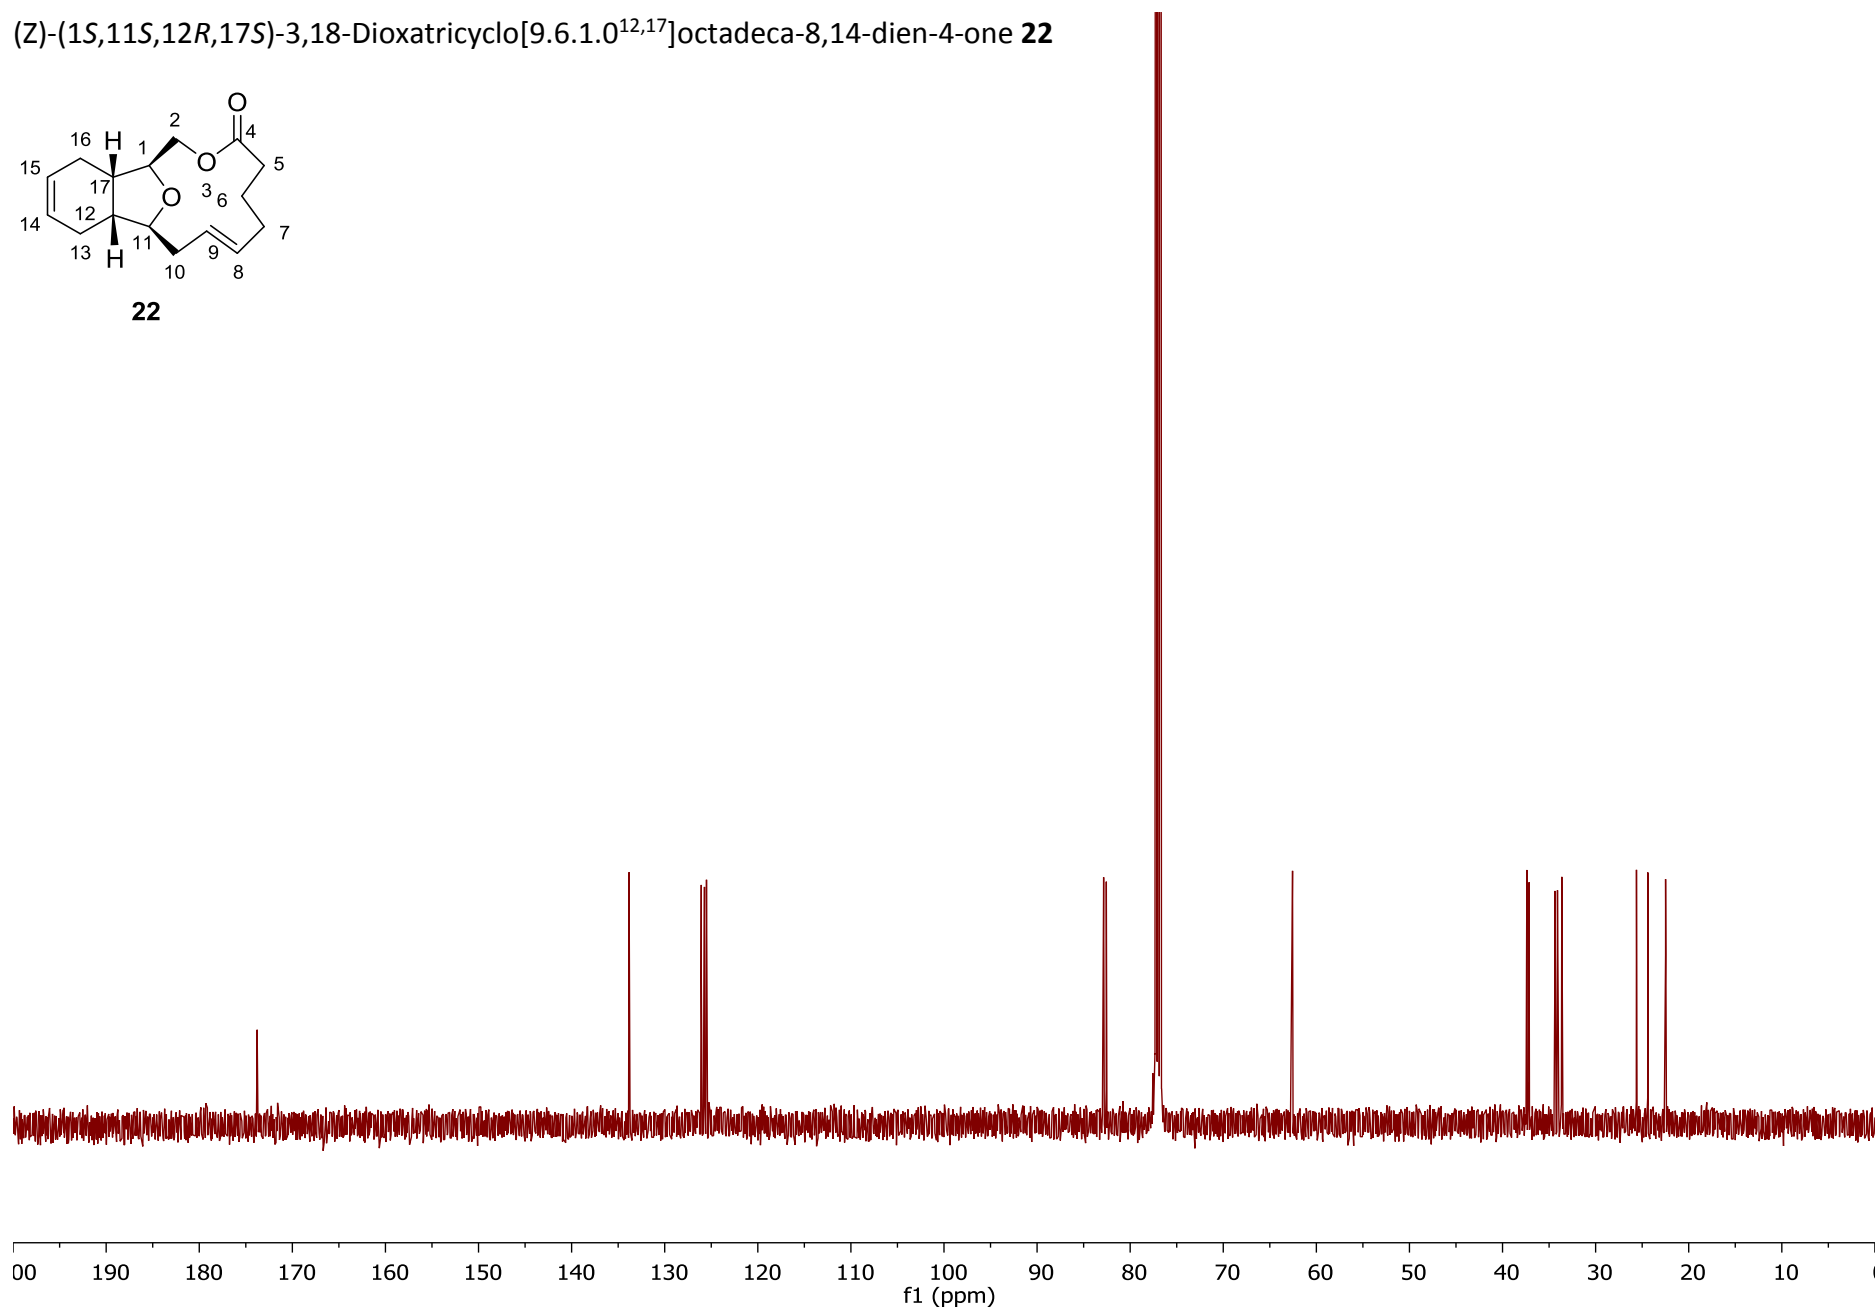

(3*S*,3*aS*,7*aR*)-3-((*tert*-Butyldiphenylsilyloxy)methyl)hexahydroisobenzofuran-1(3*H*)-one **23a**

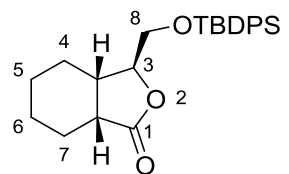

**23a**

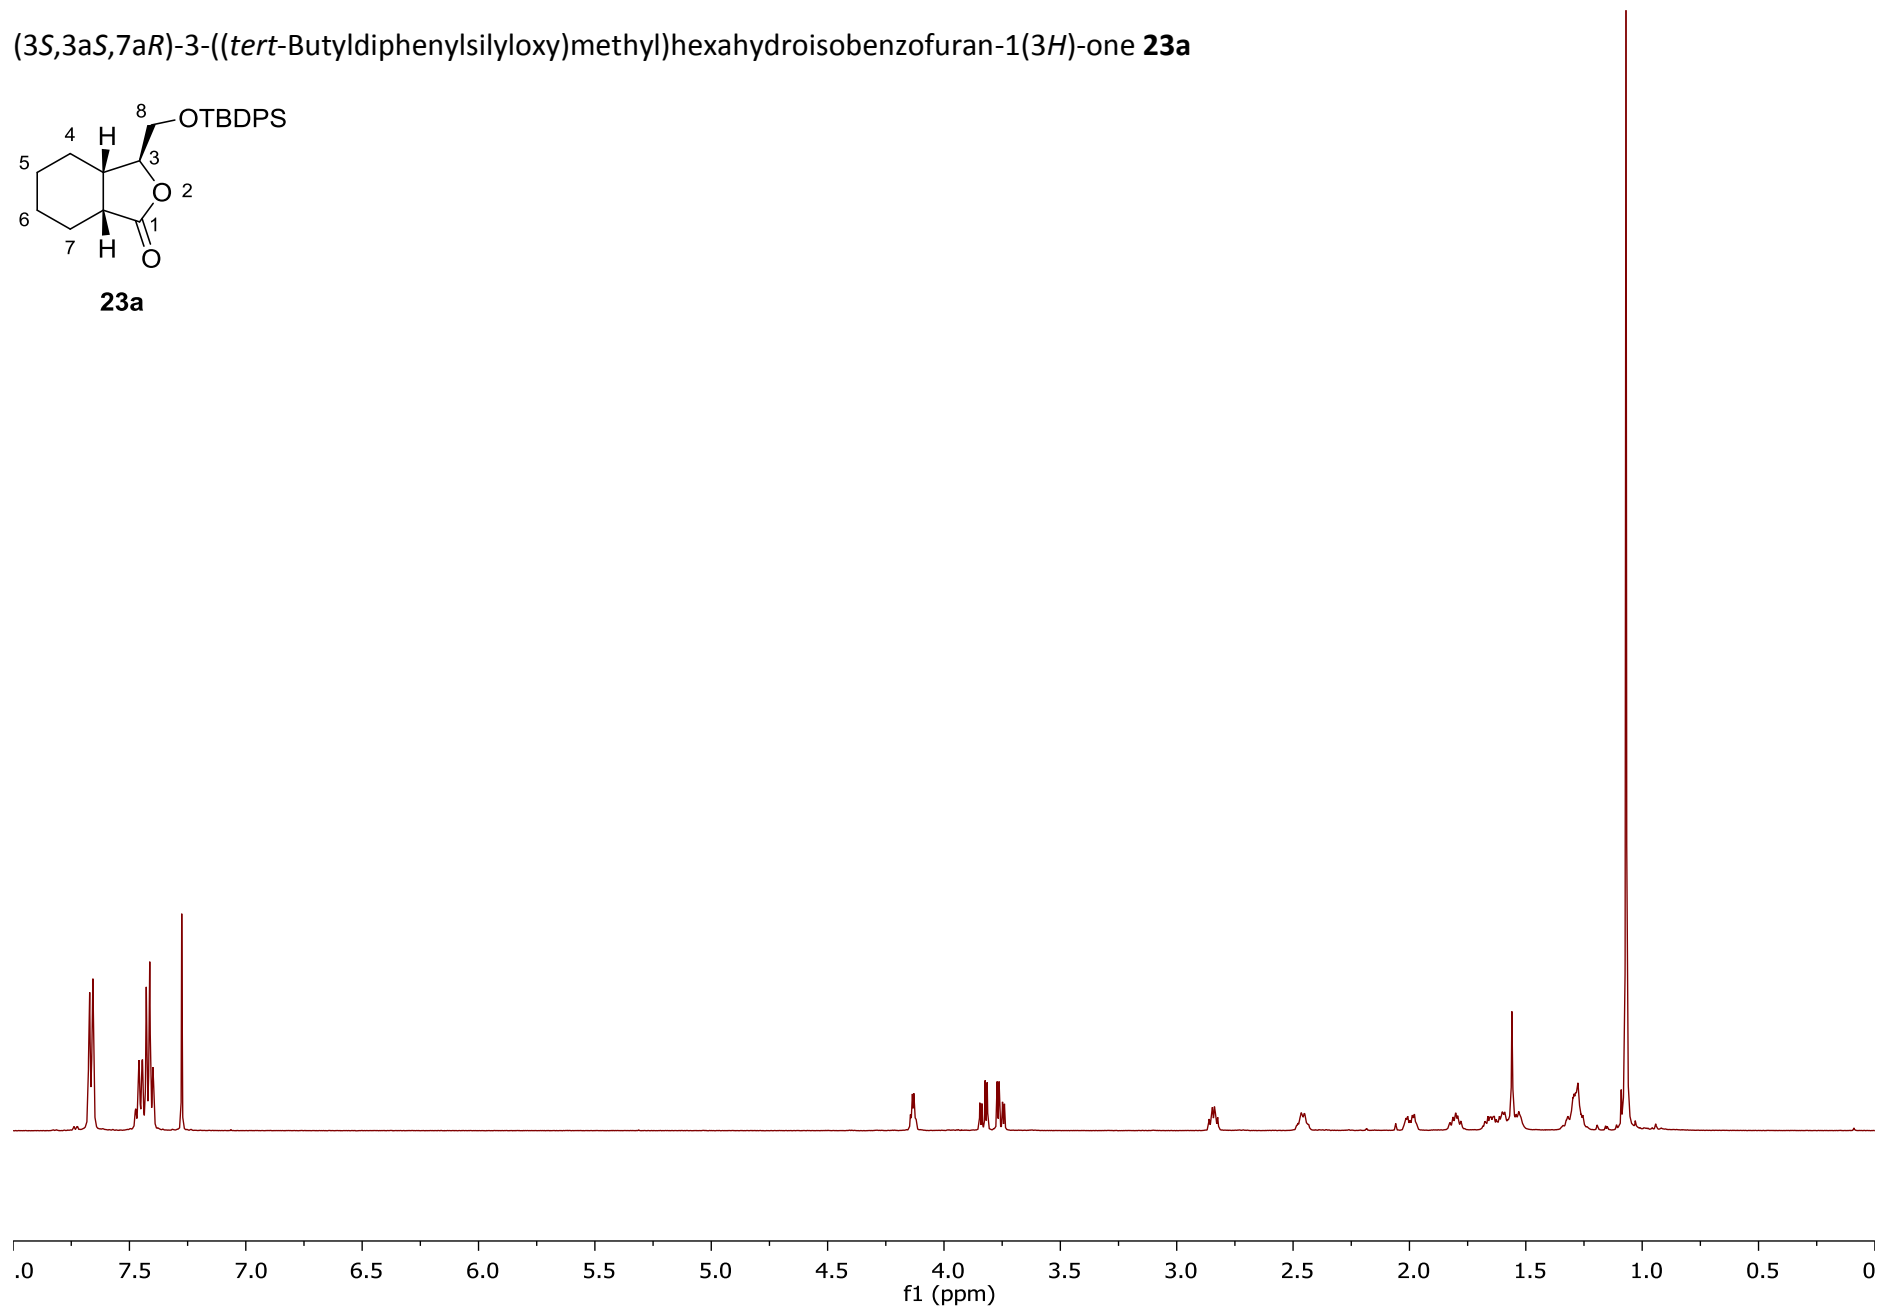

(3*S*,3*aS*,7*aR*)-3-((*tert*-Butyldiphenylsilyloxy)methyl)hexahydroisobenzofuran-1(3*H*)-one **23a**

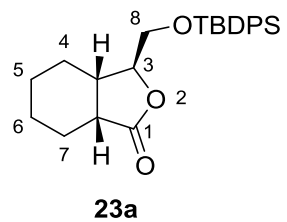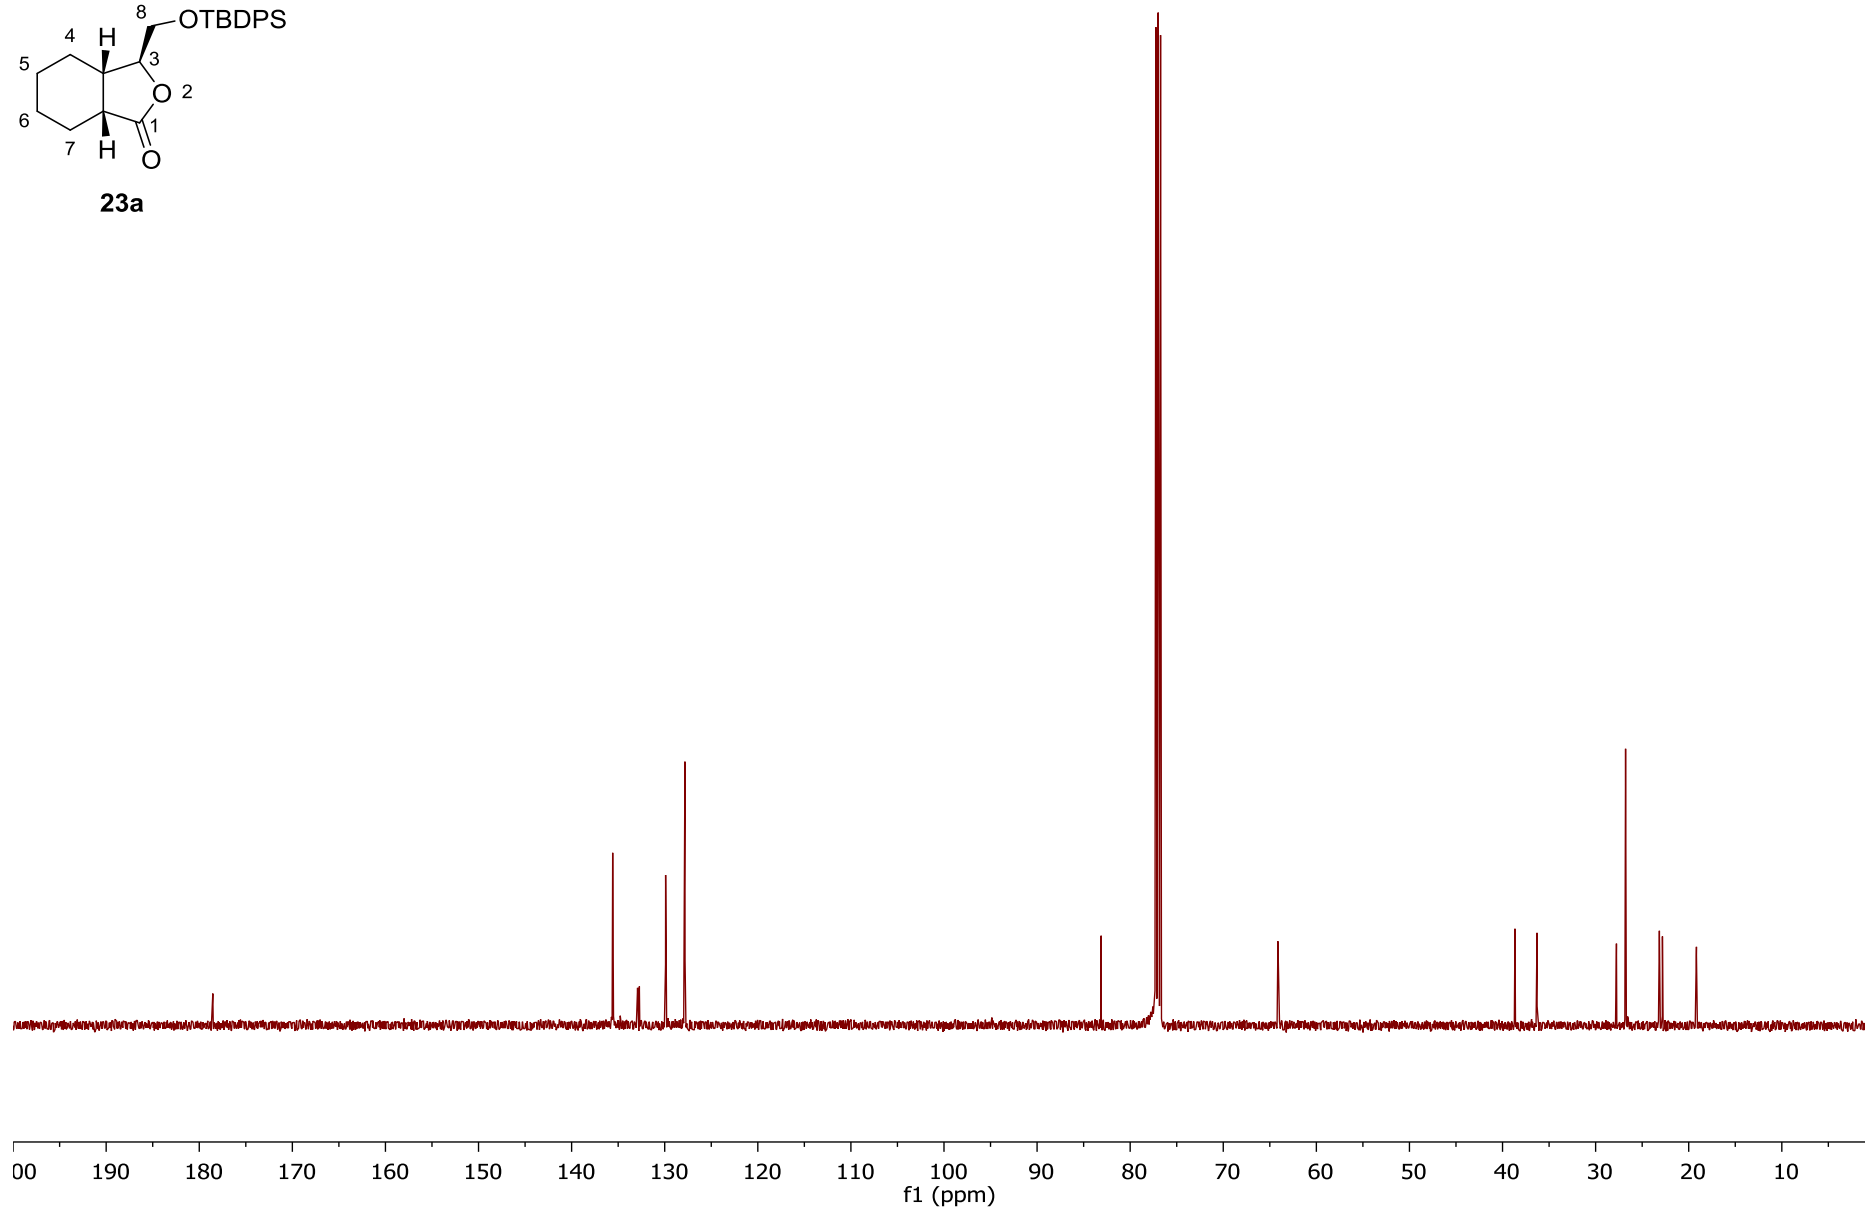

(3*S*,3*aS*,7*aR*)-3-((*tert*-Butyldiphenylsilyloxy)methyl)octahydroisobenzofuran-1-ol **23**

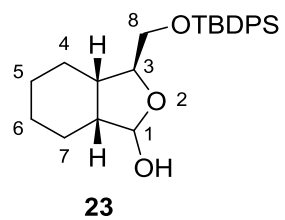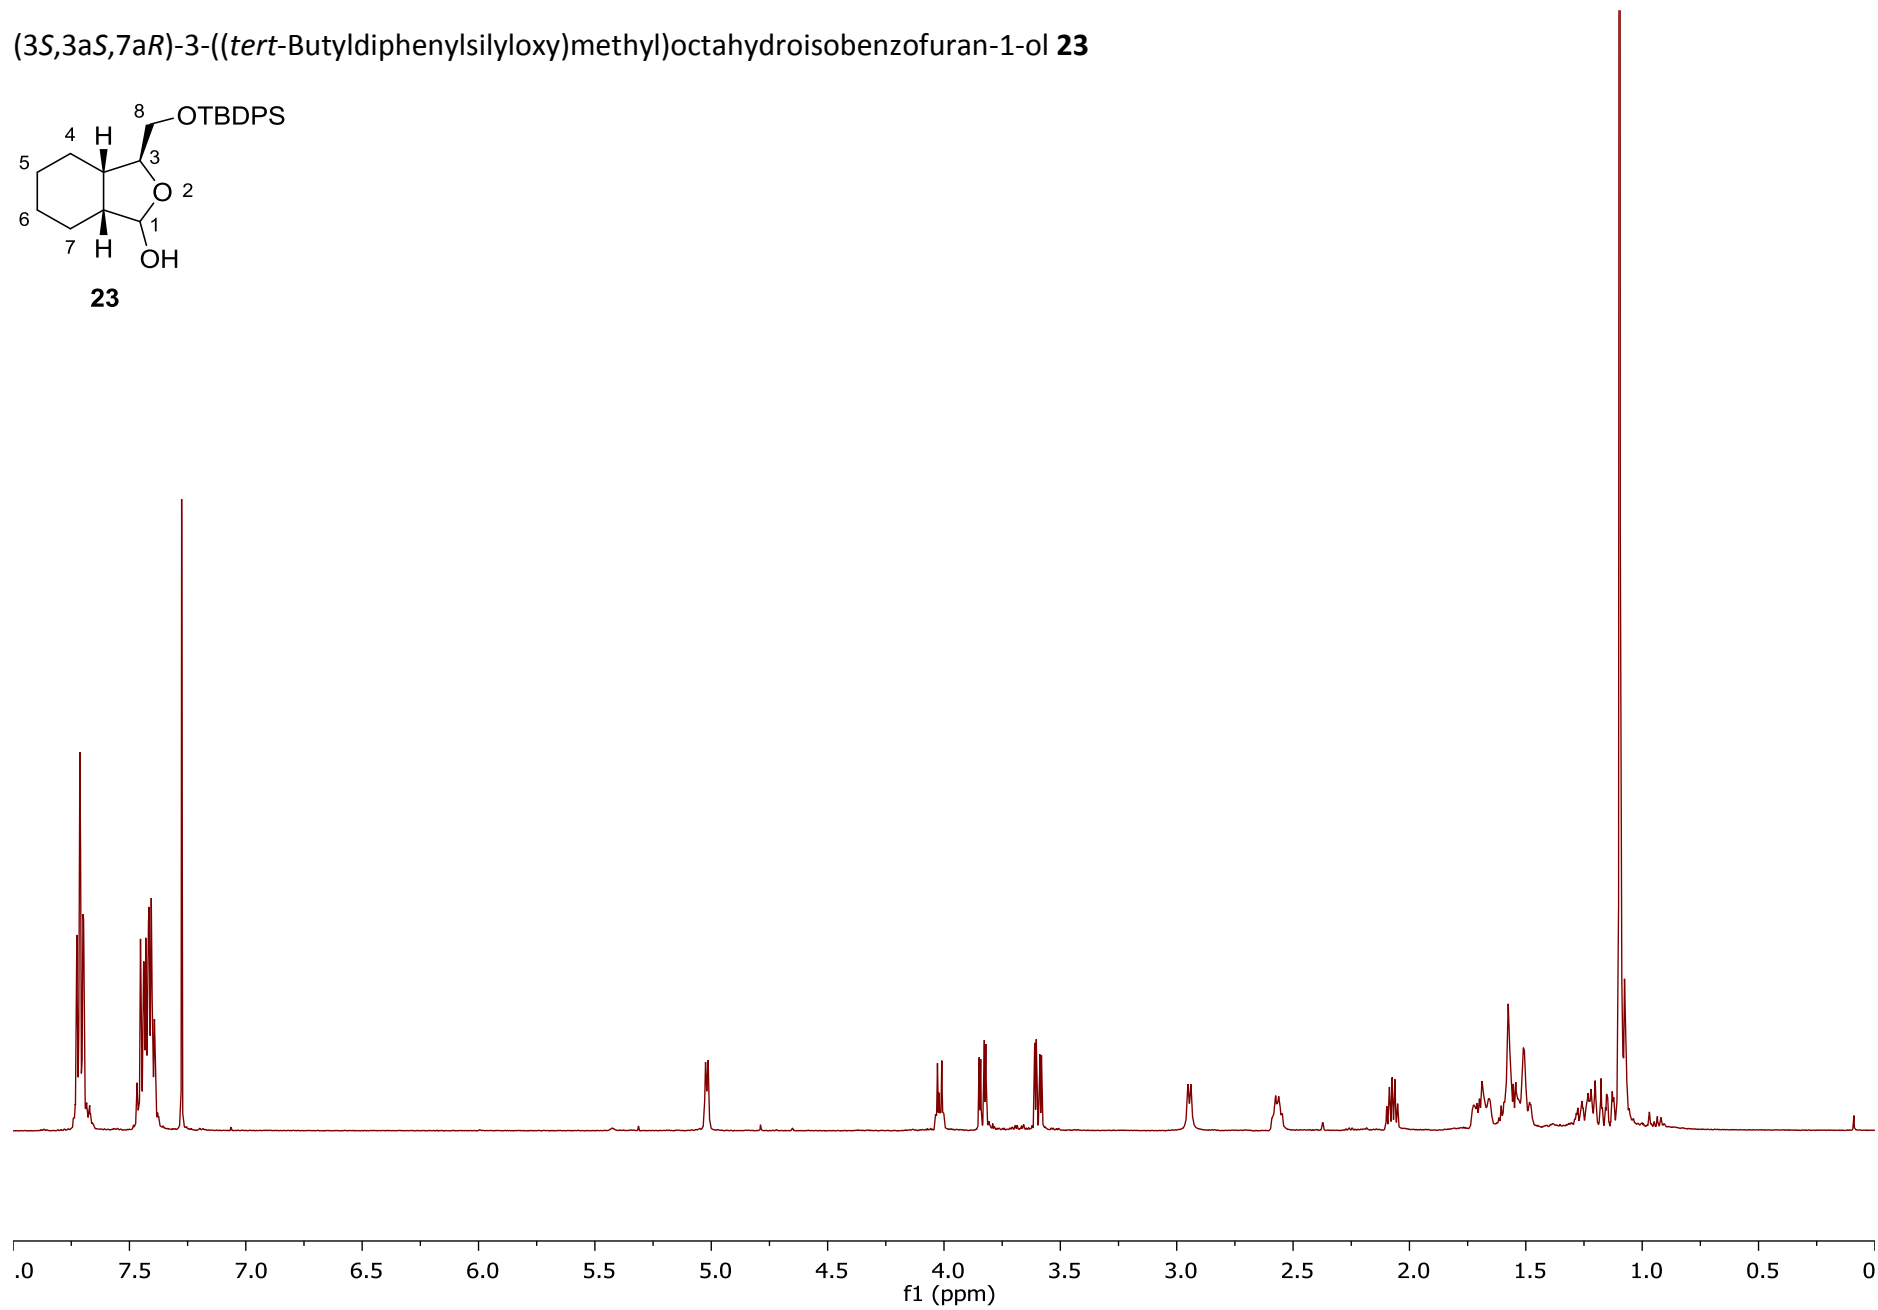

(3*S*,3*aS*,7*aR*)-3-((*tert*-Butyldiphenylsilyloxy)methyl)octahydroisobenzofuran-1-ol **23**

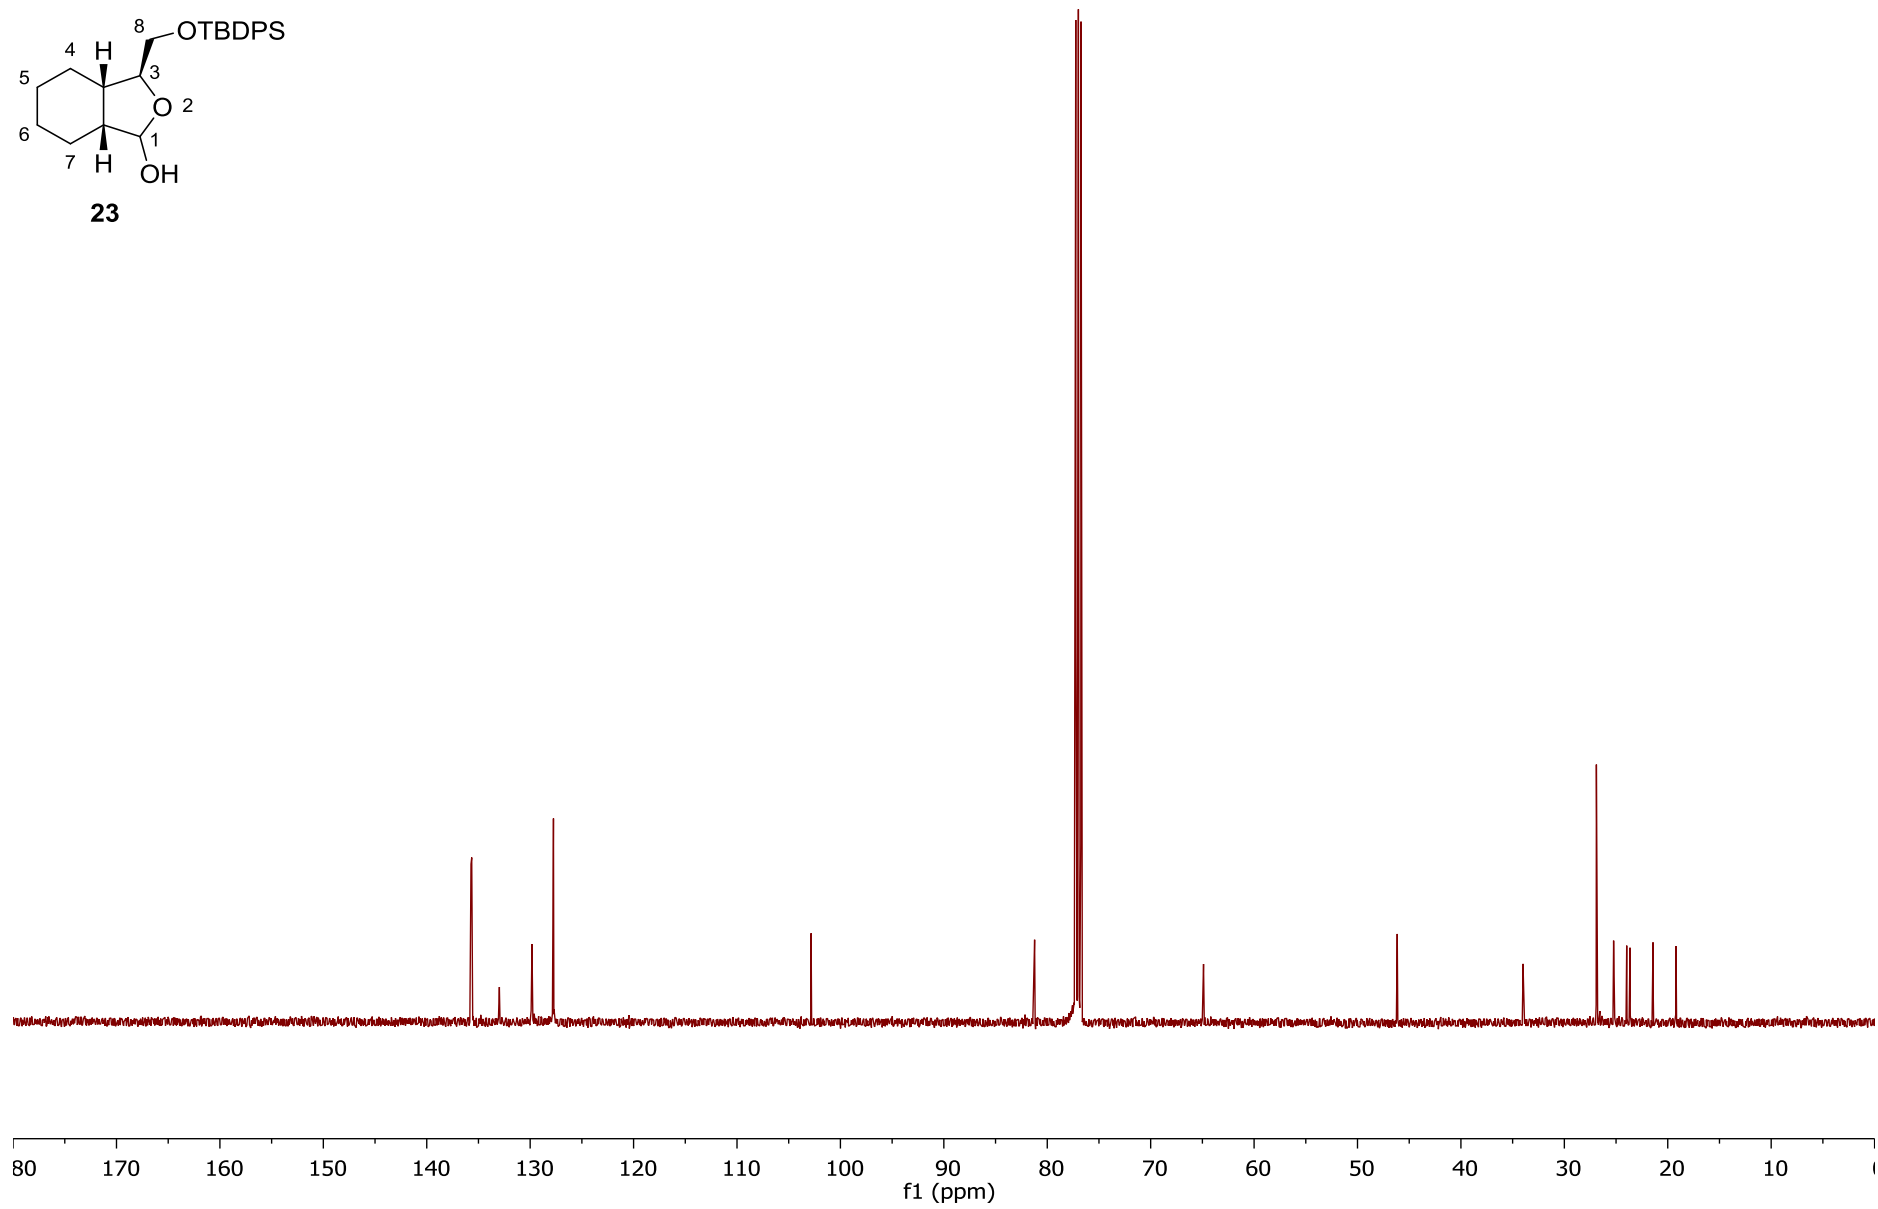

((1*S*,3*S*,3*aR*,7*aS*)-3-Allyl-octahydro-isobenzofuran-1-ylmethoxy)-*tert*-butyldiphenylsilane **24**

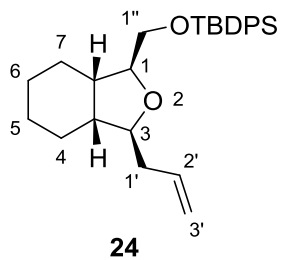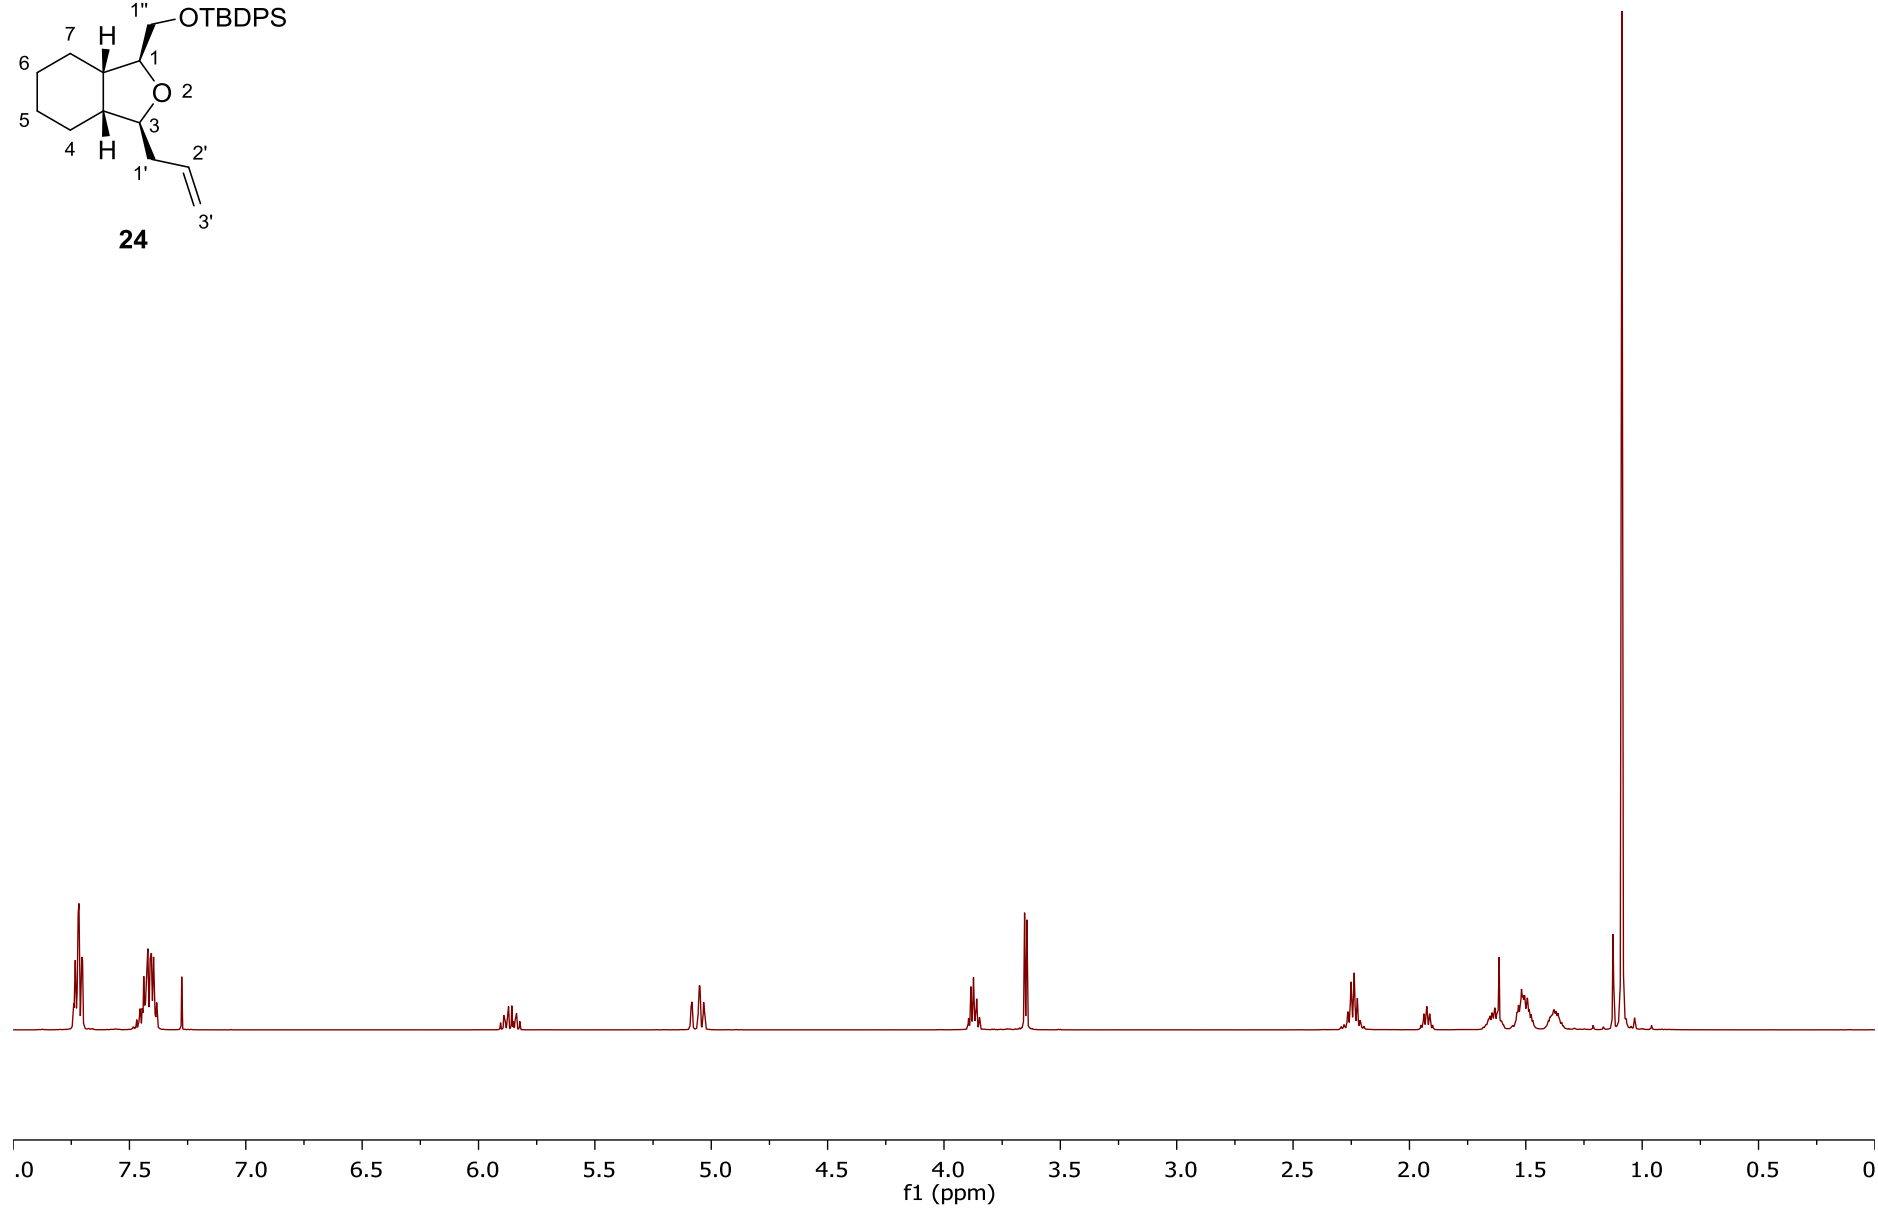

((1*S*,3*S*,3*aR*,7*aS*)-3-Allyl-octahydro-isobenzofuran-1-ylmethoxy)-*tert*-butyldiphenylsilane **24**

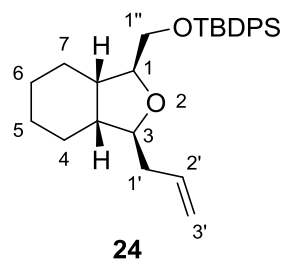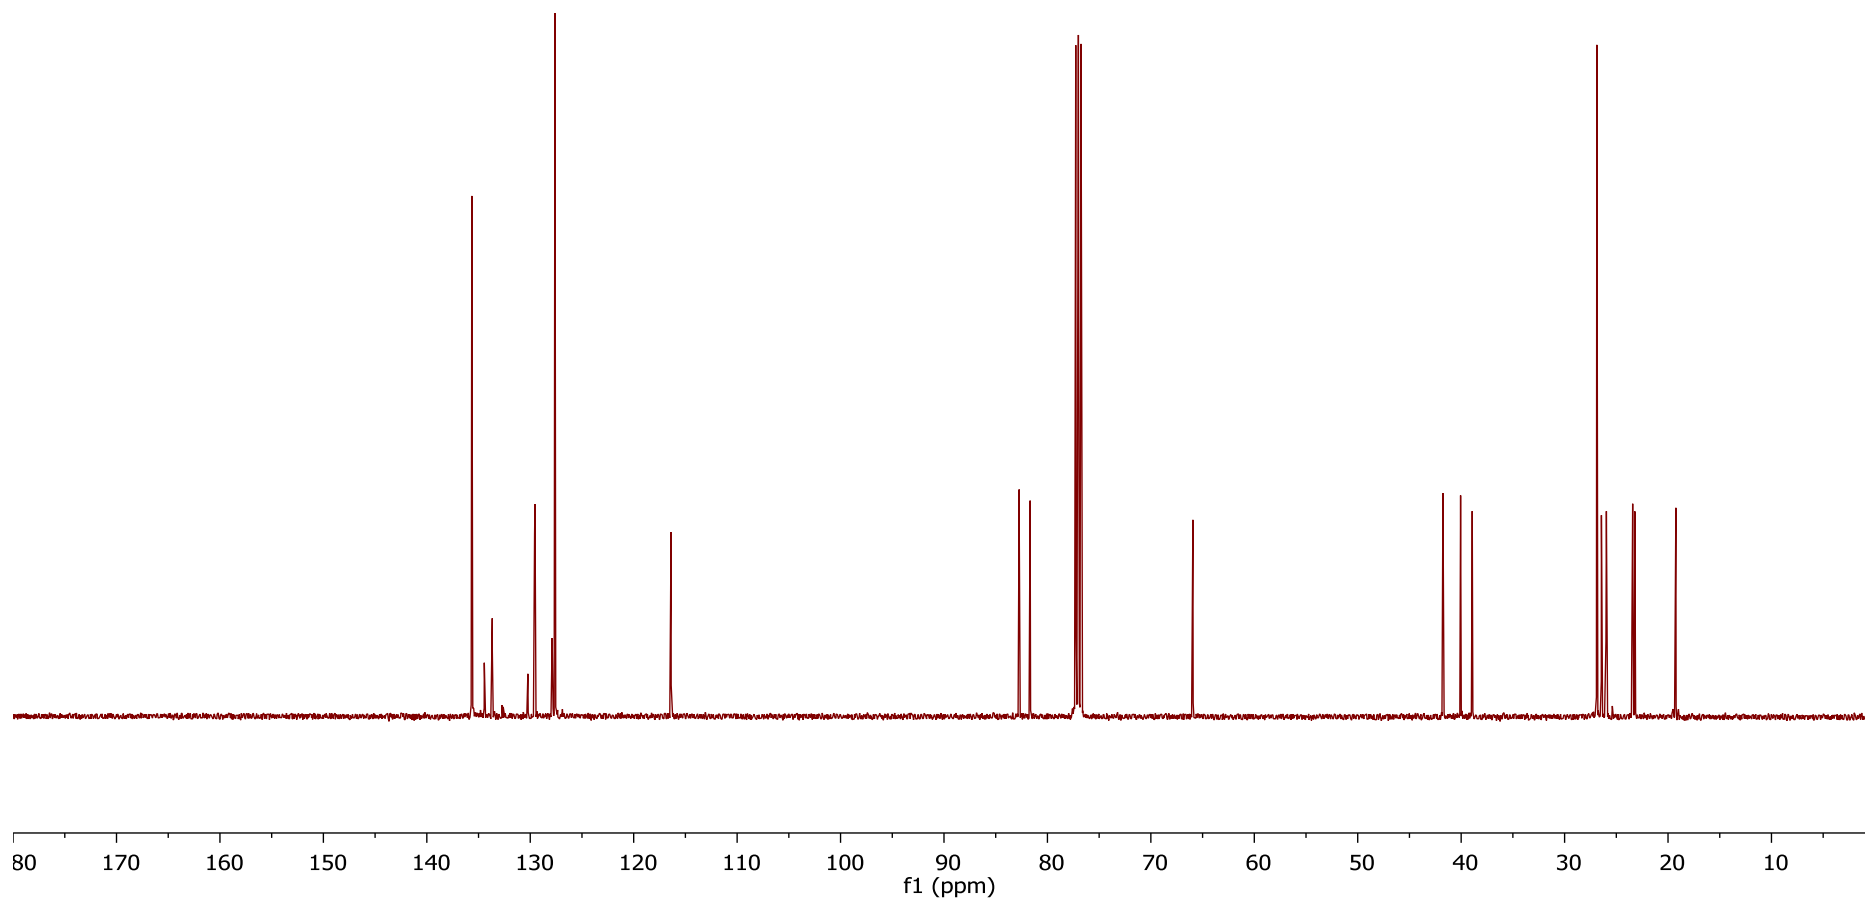



**((1*S*,3*S*,3*aR*,7*aS*)-3-Allyl-octahydro-isobenzofuran-1-yl)-methanol **25****

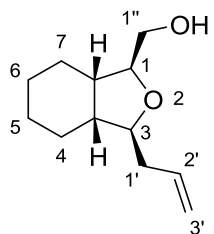

**25**

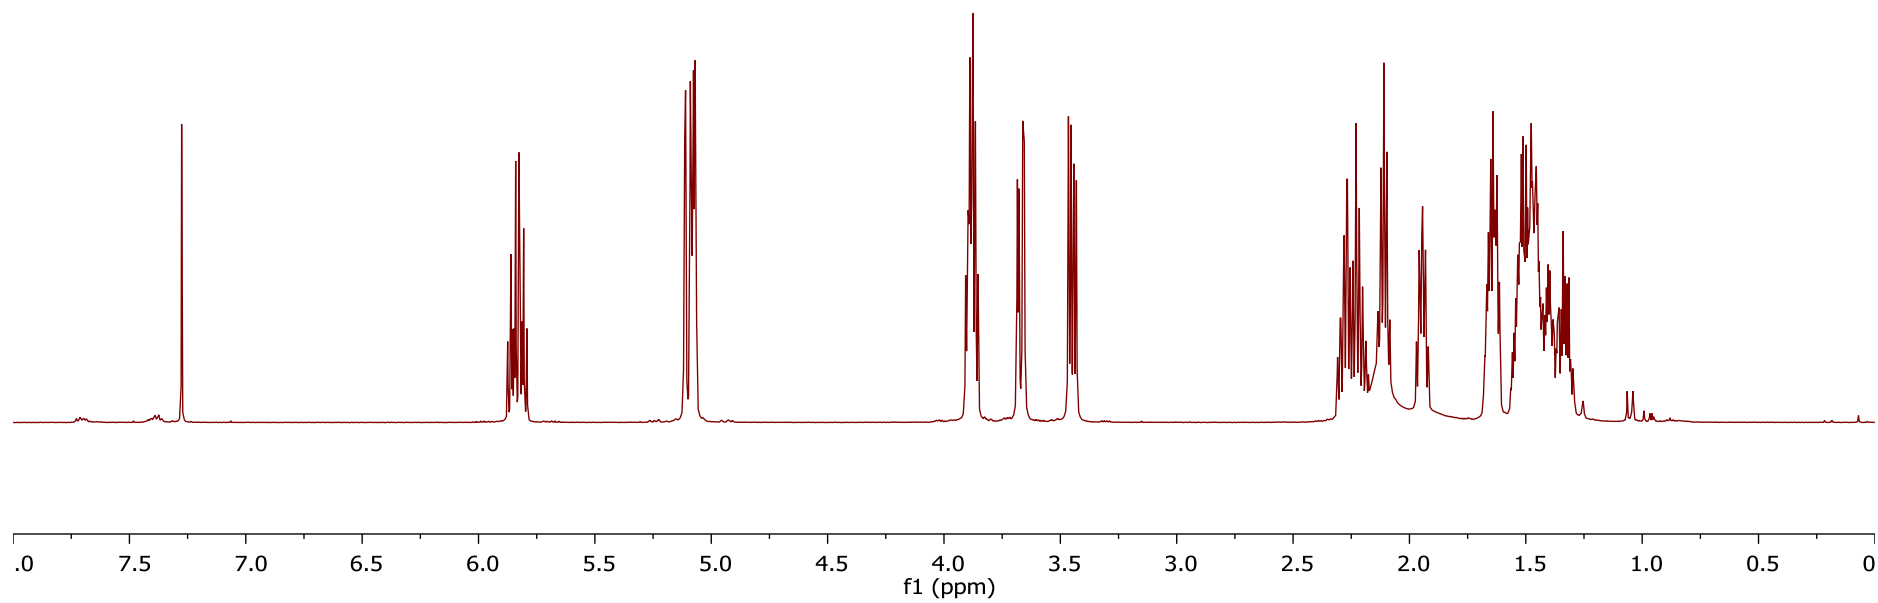

**((1*S*,3*S*,3*aR*,7*aS*)-3-Allyl-octahydro-isobenzofuran-1-yl)-methanol **25****



**25**

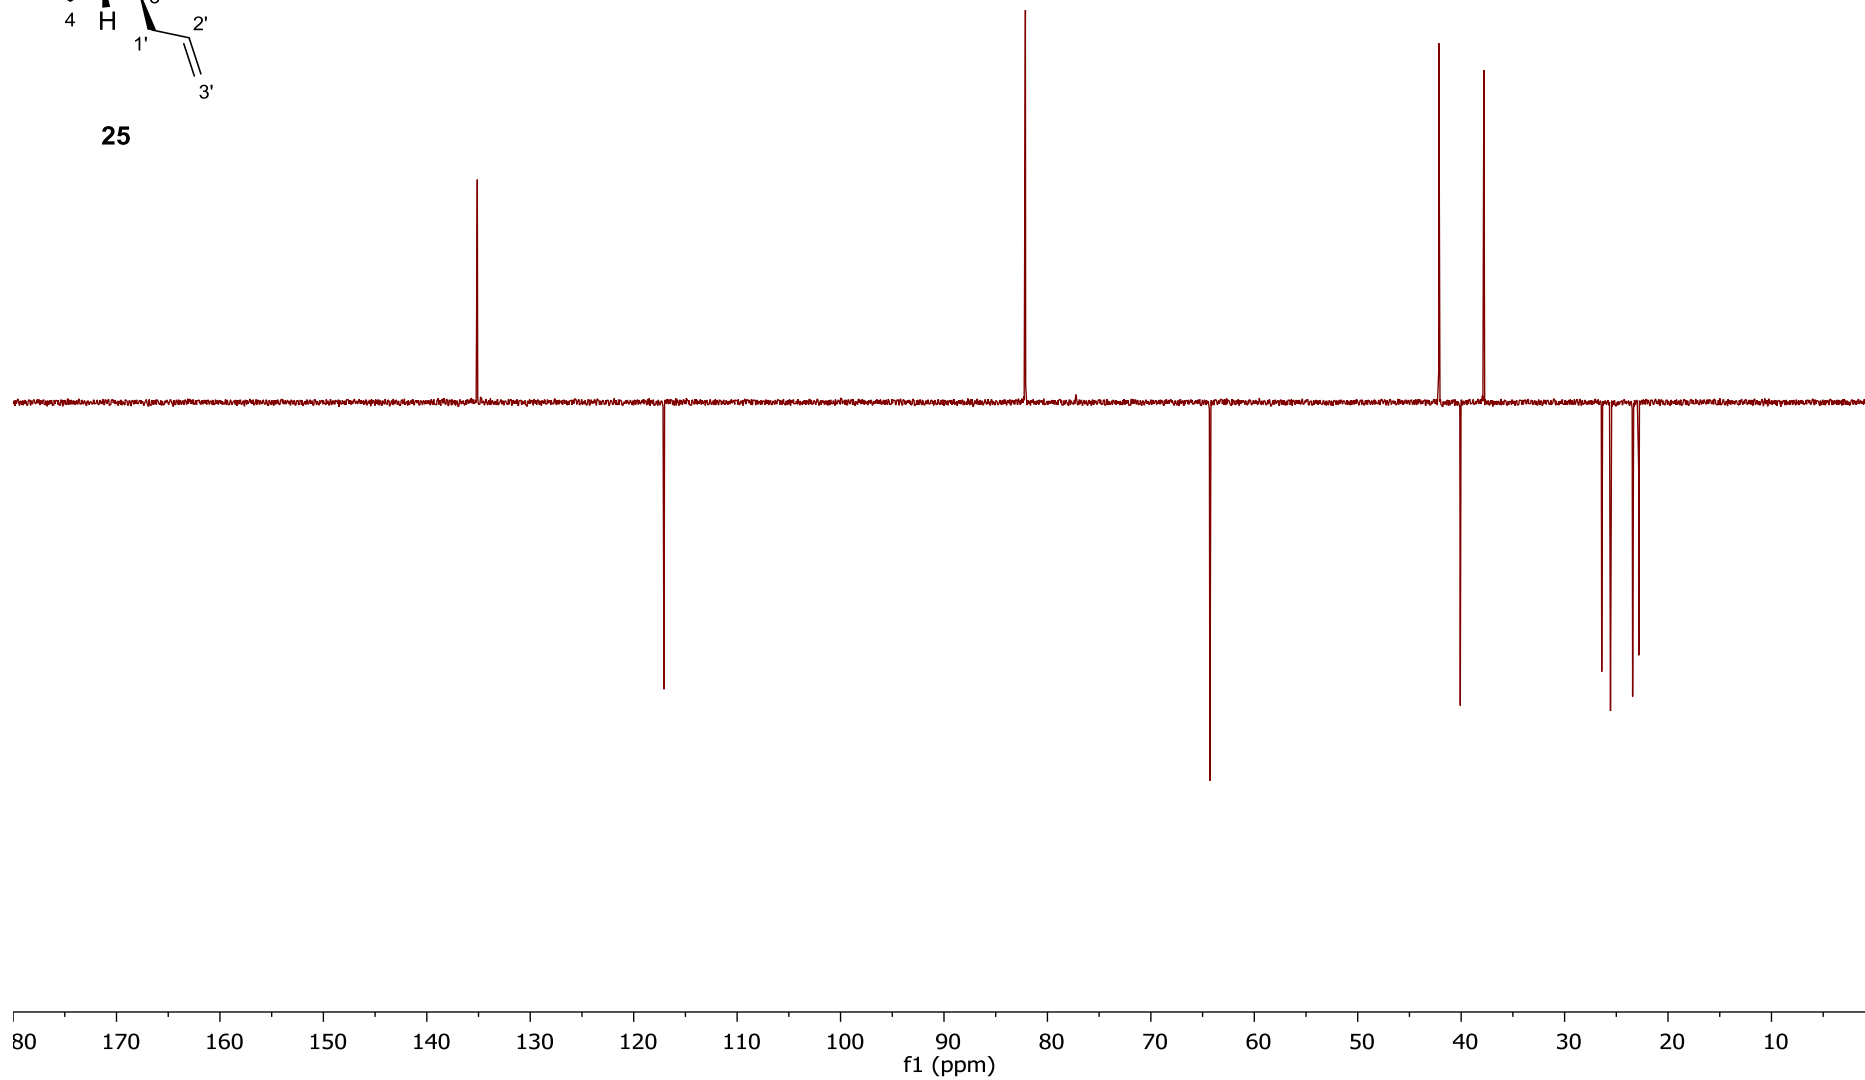

**((1S,3S,3aR,7aS)-3-allyloctahydroisobenzofuran-1-yl)methyl pent-4-enoate 77**

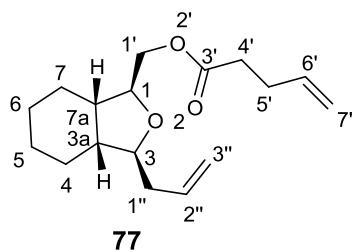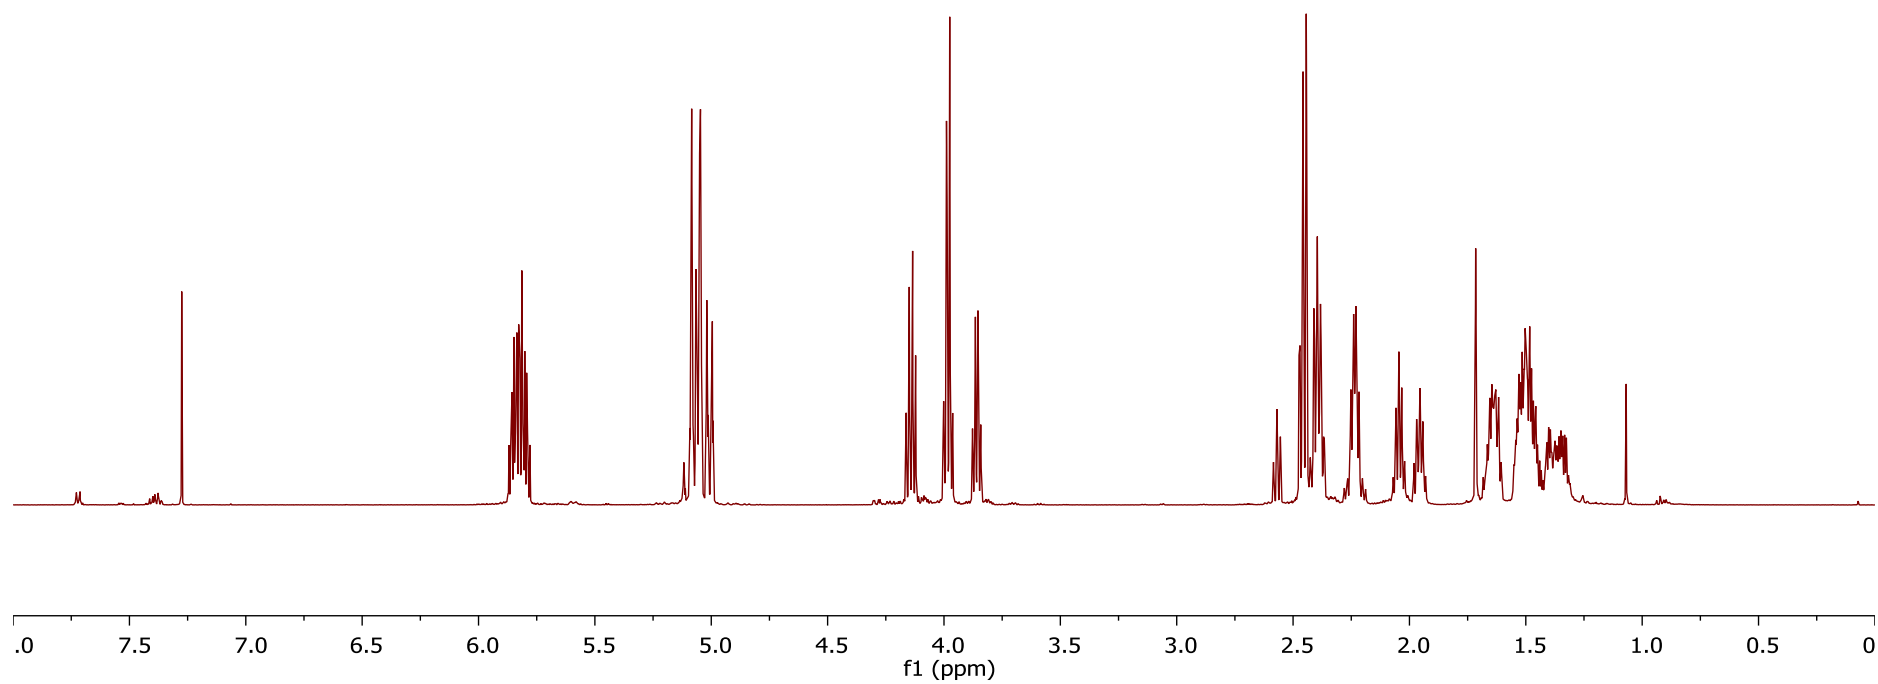

**((1*S*,3*S*,3*a**R*,7*a**S*)-3-allyloctahydroisobenzofuran-1-yl)methyl pent-4-enoate **77****

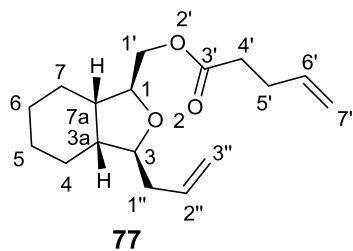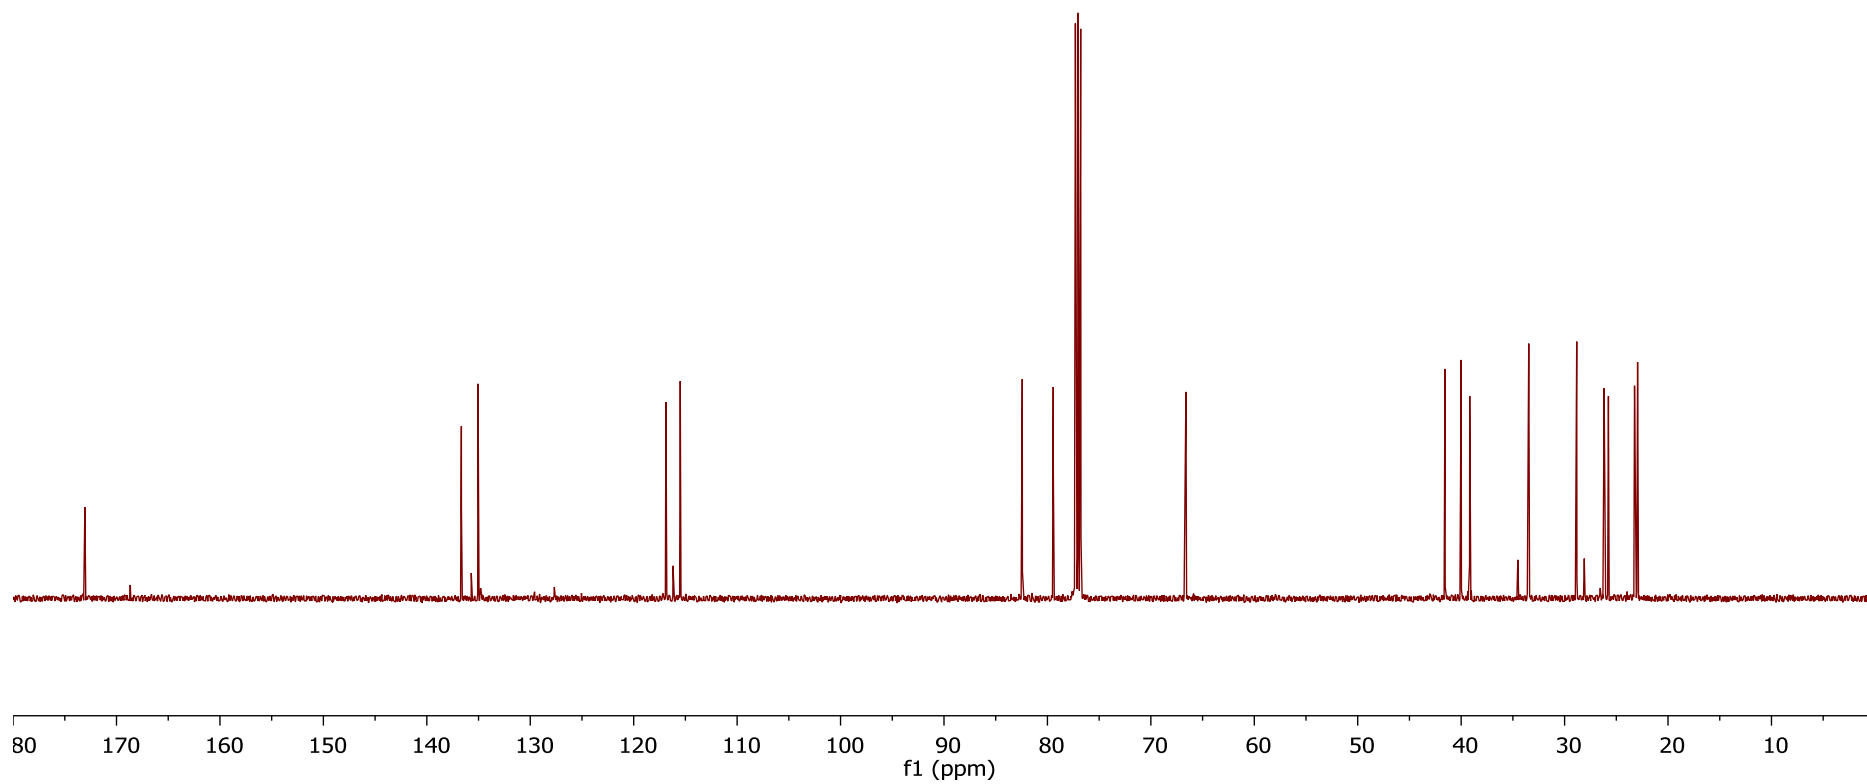

(Z)-(1*S*,10*S*,11*R*,16*S*)-3,17-Dioxatricyclo[8.6.1.0<sup>11,16</sup>]heptadeca-7-en-4-one **26**

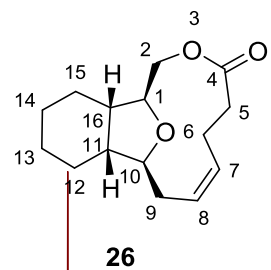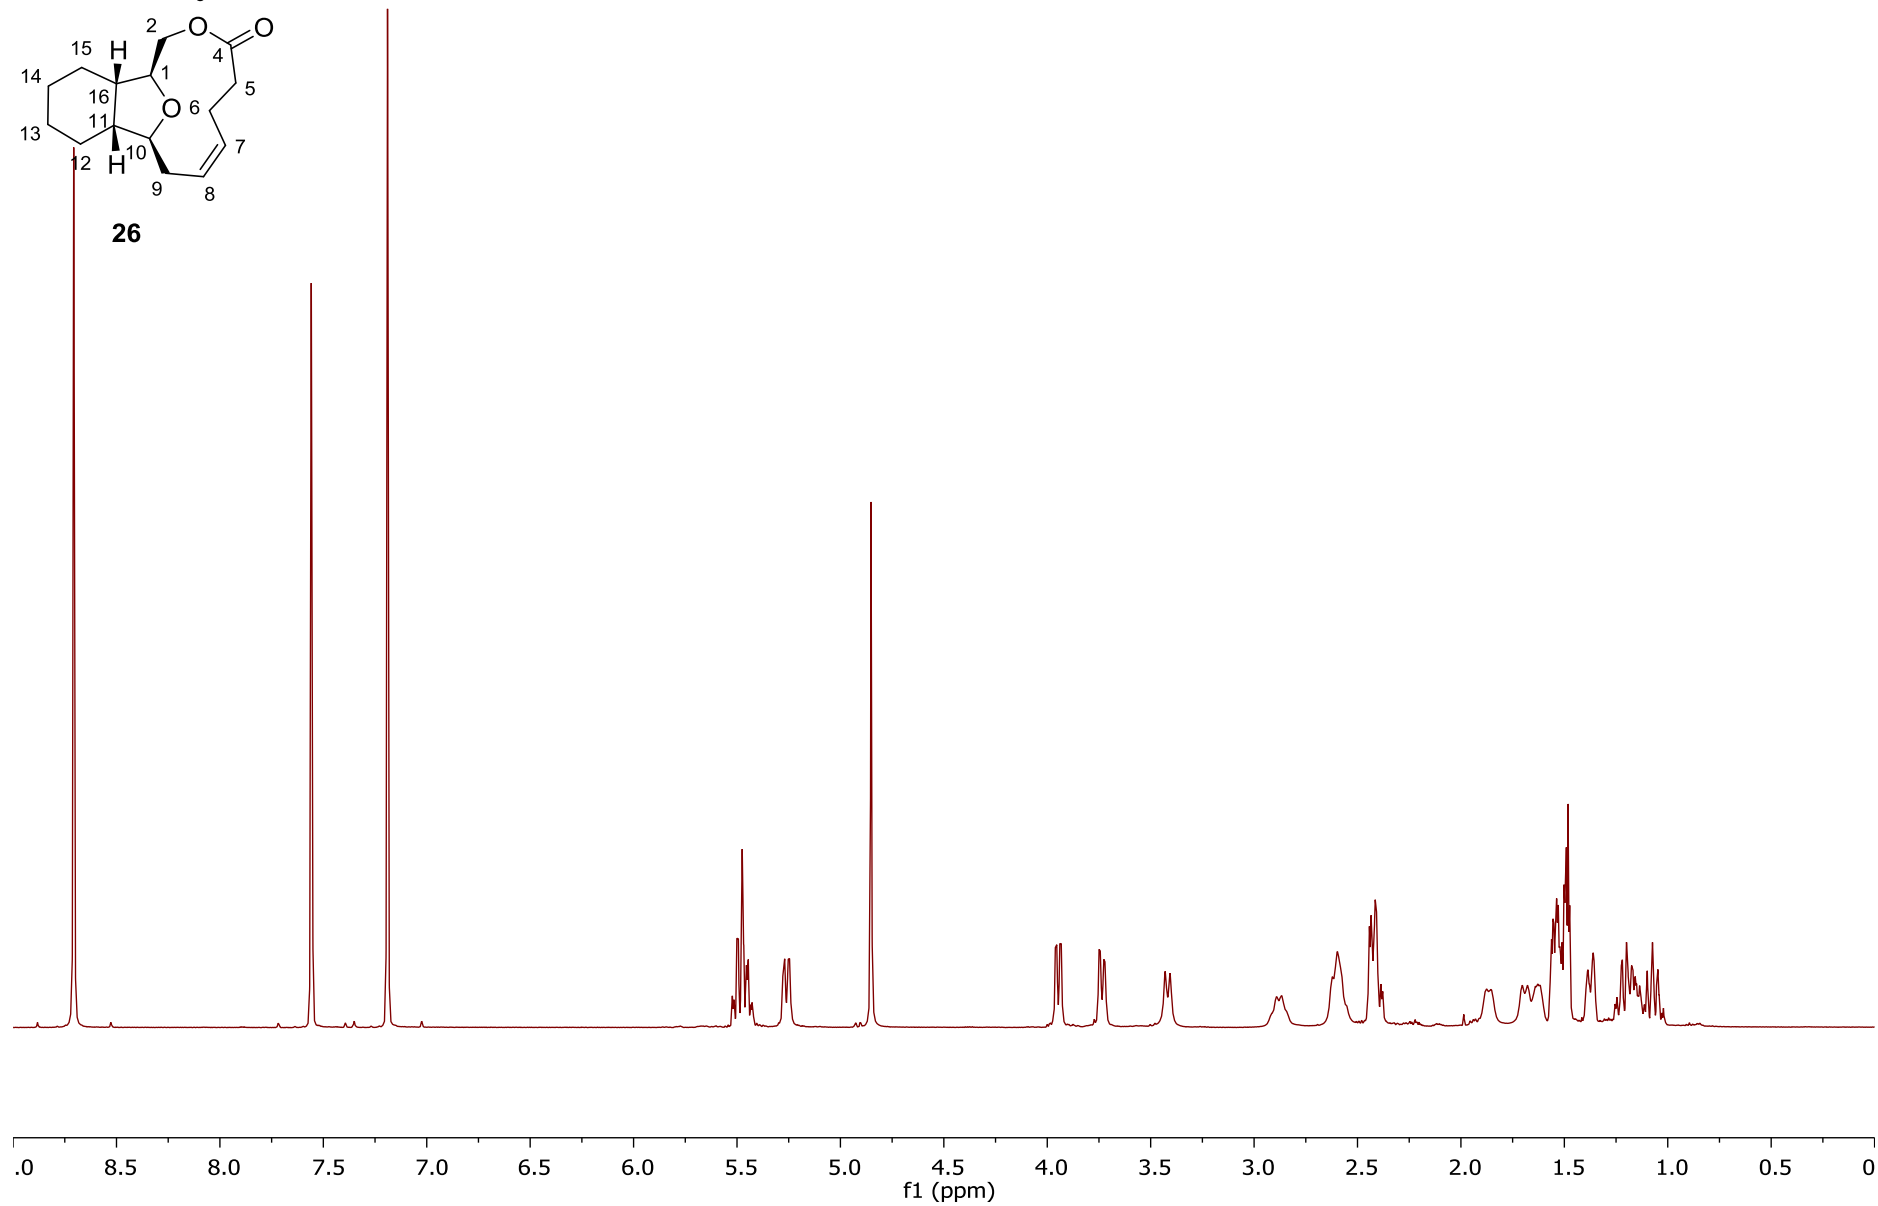

(Z)-(1*S*,10*S*,11*R*,16*S*)-3,17-Dioxatricyclo[8.6.1.0<sup>11,16</sup>]heptadeca-7-en-4-one **26**

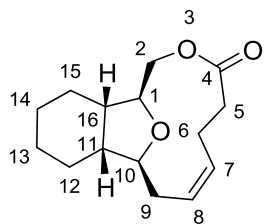

**26**

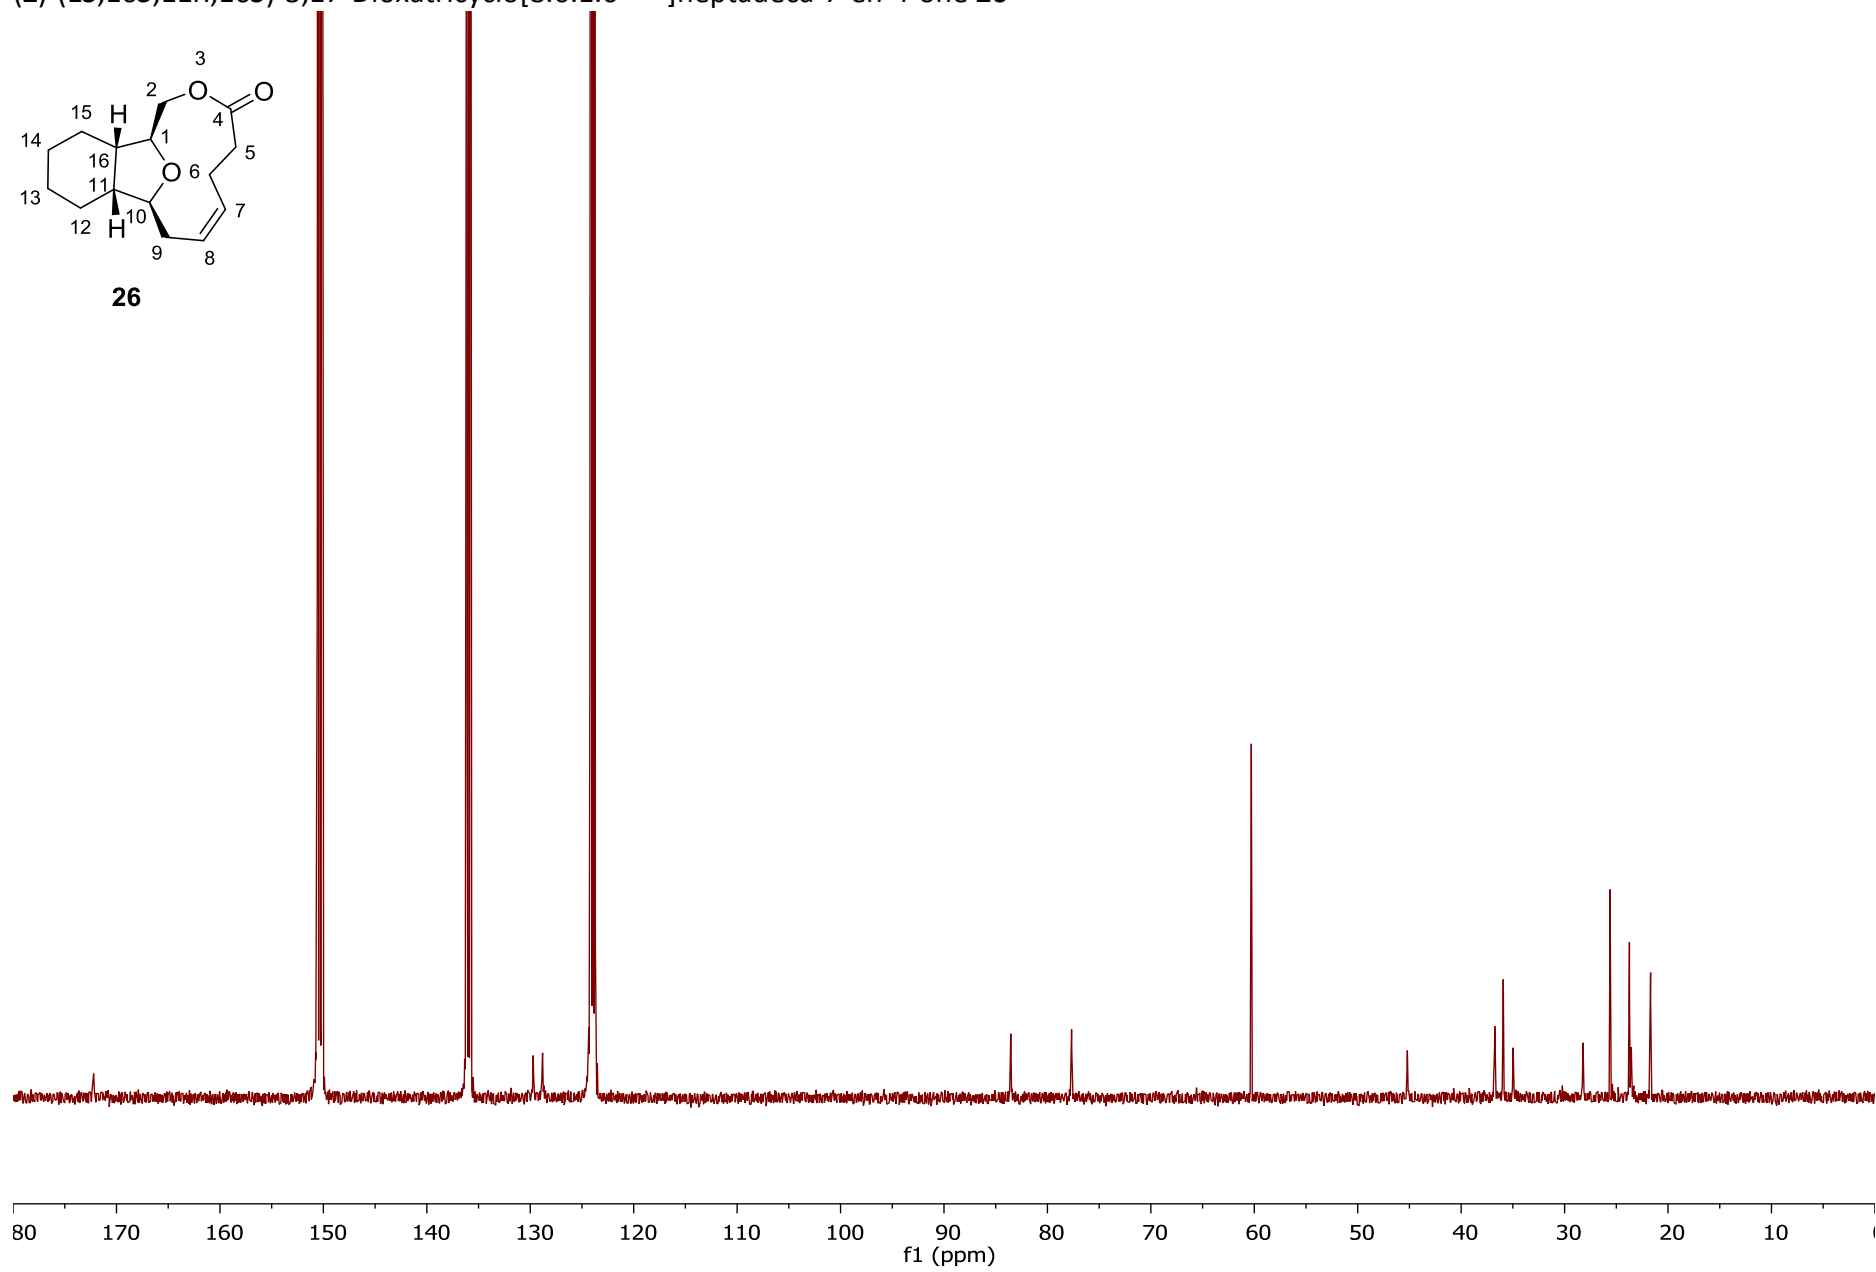

(E)-(1*S*,10*S*,11*R*,16*S*)-3,17-Dioxatricyclo[8.6.1.0<sup>11,16</sup>]heptadeca-7-en-4-one **27**

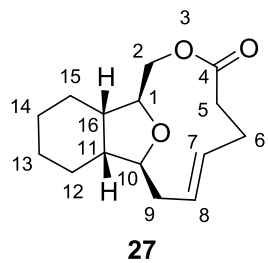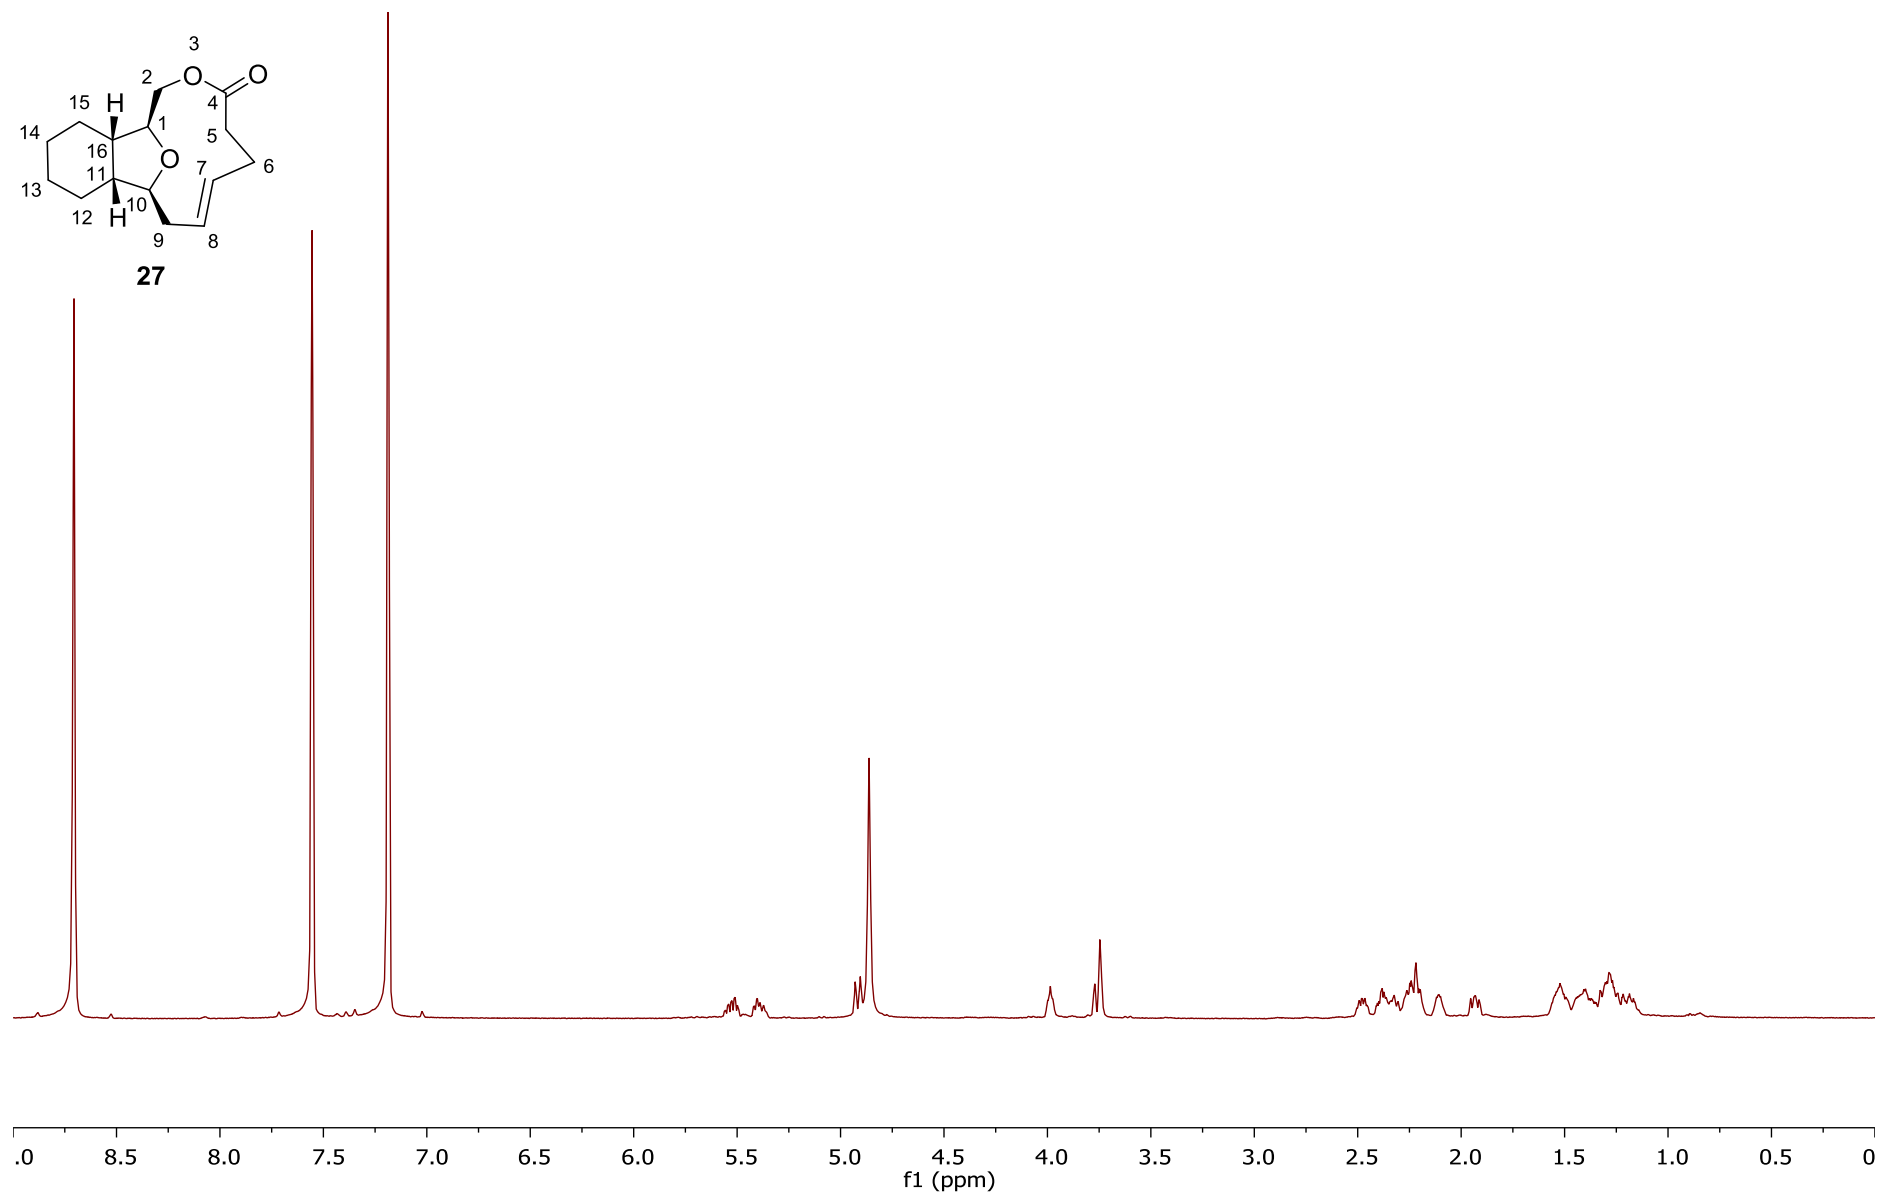

(E)-(1*S*,10*S*,11*R*,16*S*)-3,17-Dioxatricyclo[8.6.1.0<sup>11,16</sup>]heptadeca-7-en-4-one **27**

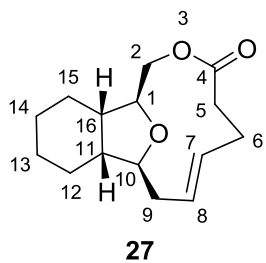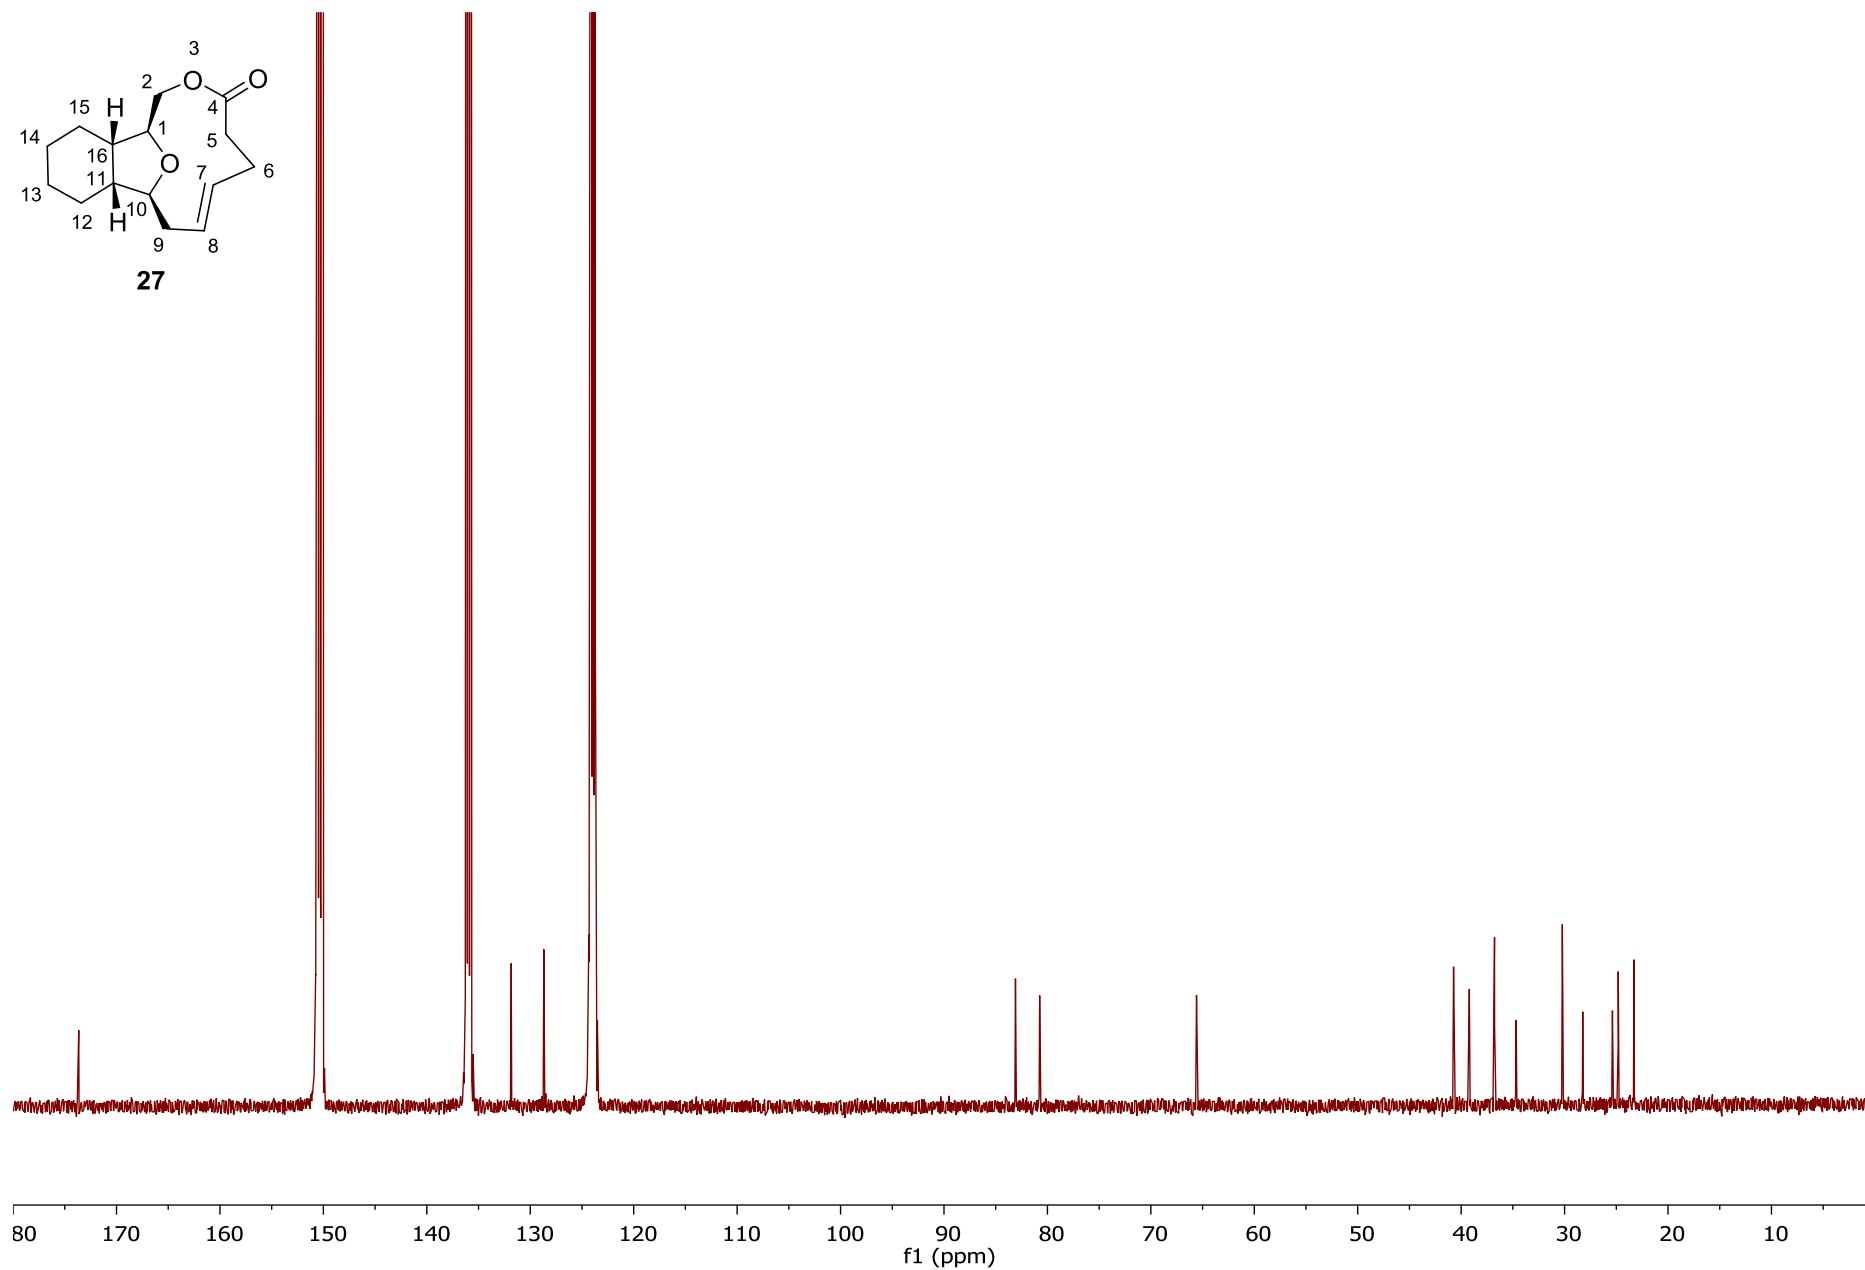





**((1S,3S,3aR,7aS)-3-allyloctahydroisobenzofuran-1-yl)methyl hex-5-enoate **78****

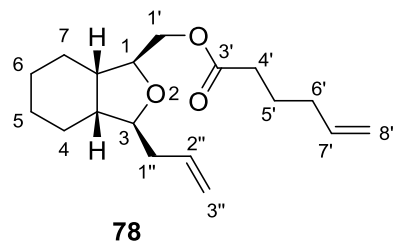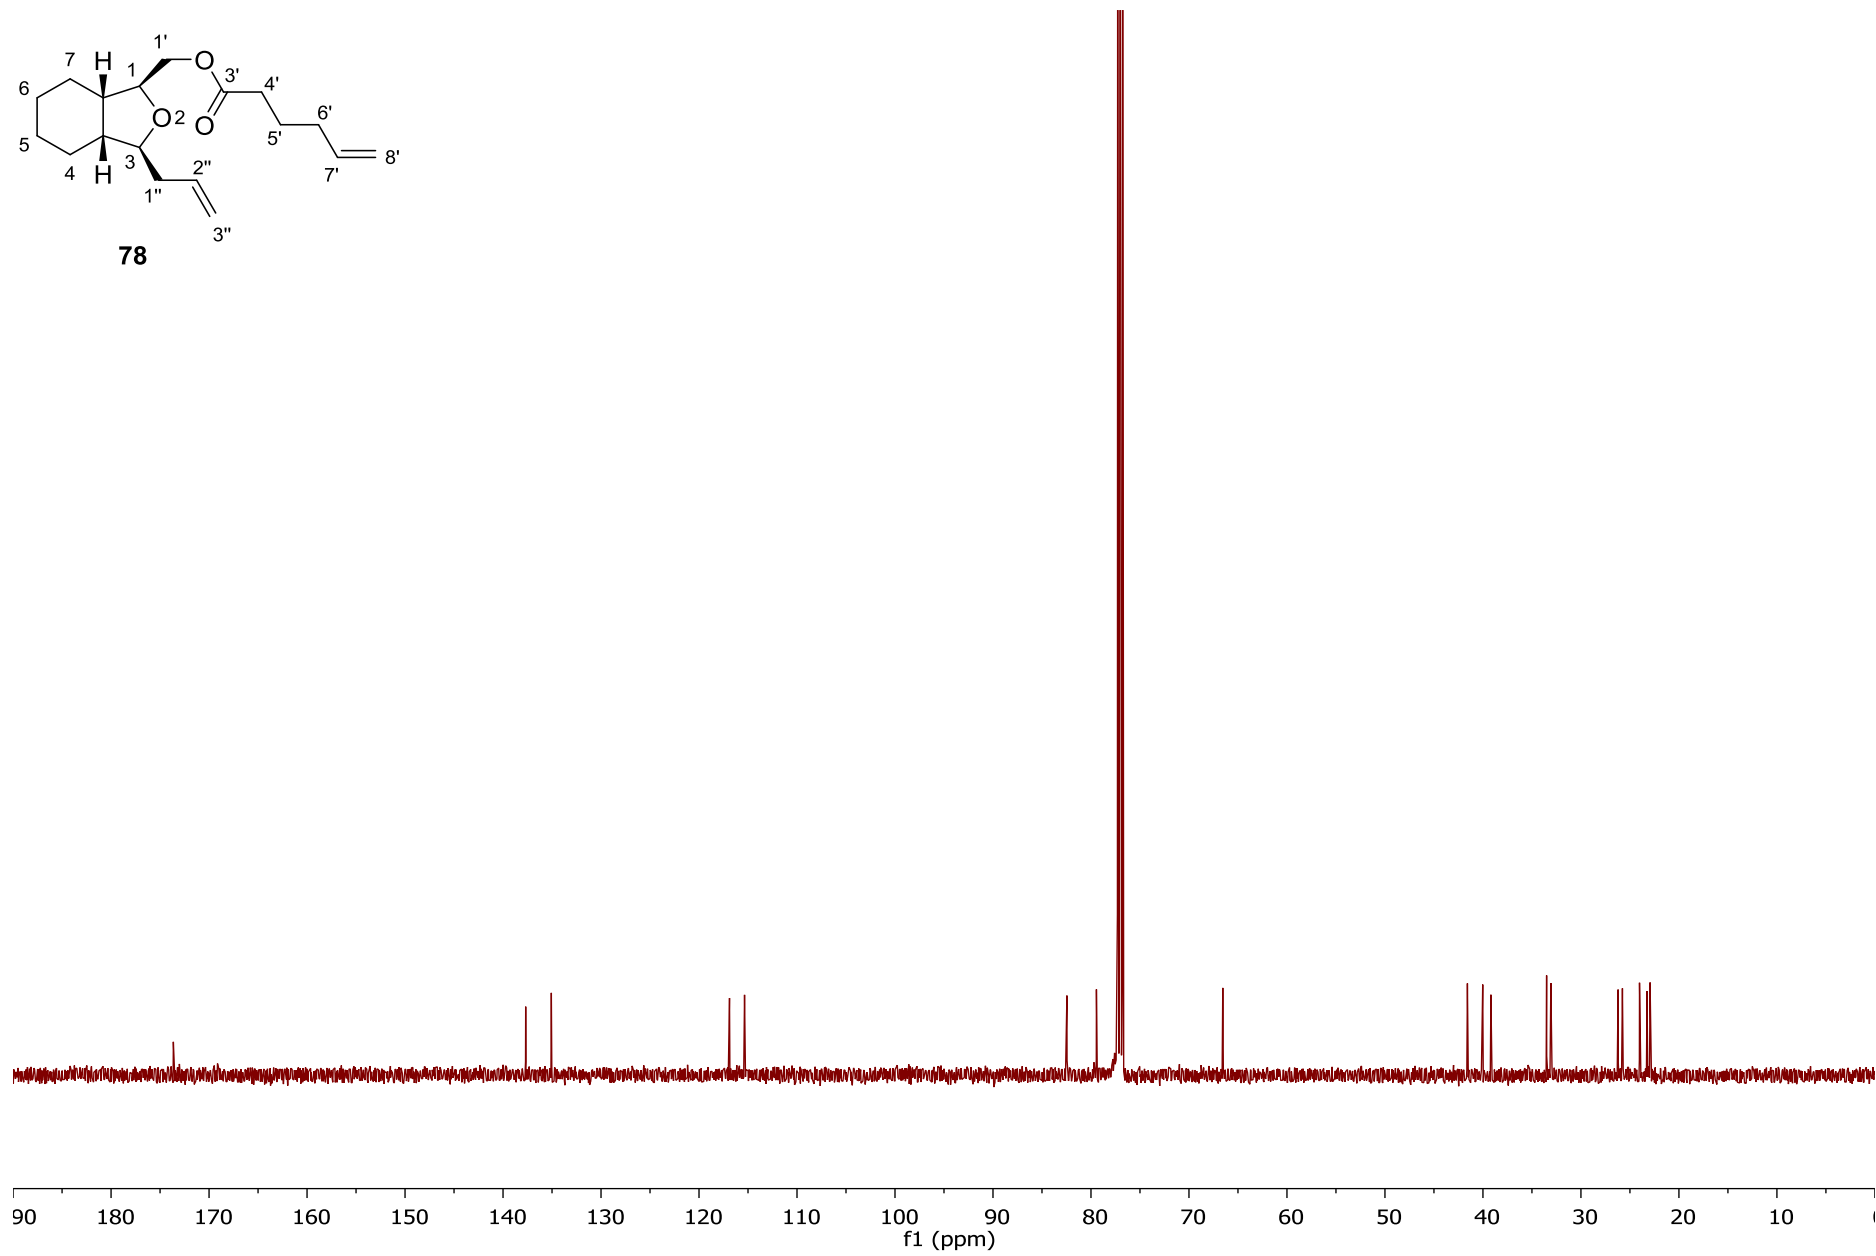

(Z)-(1S,11S,12R,17S)-3,18-Dioxatricyclo[9.6.1.0<sup>12,17</sup>]octadec-8-en-4-one **28**

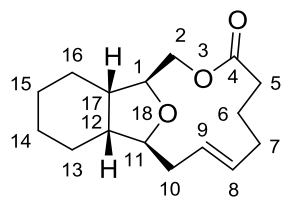

**28**

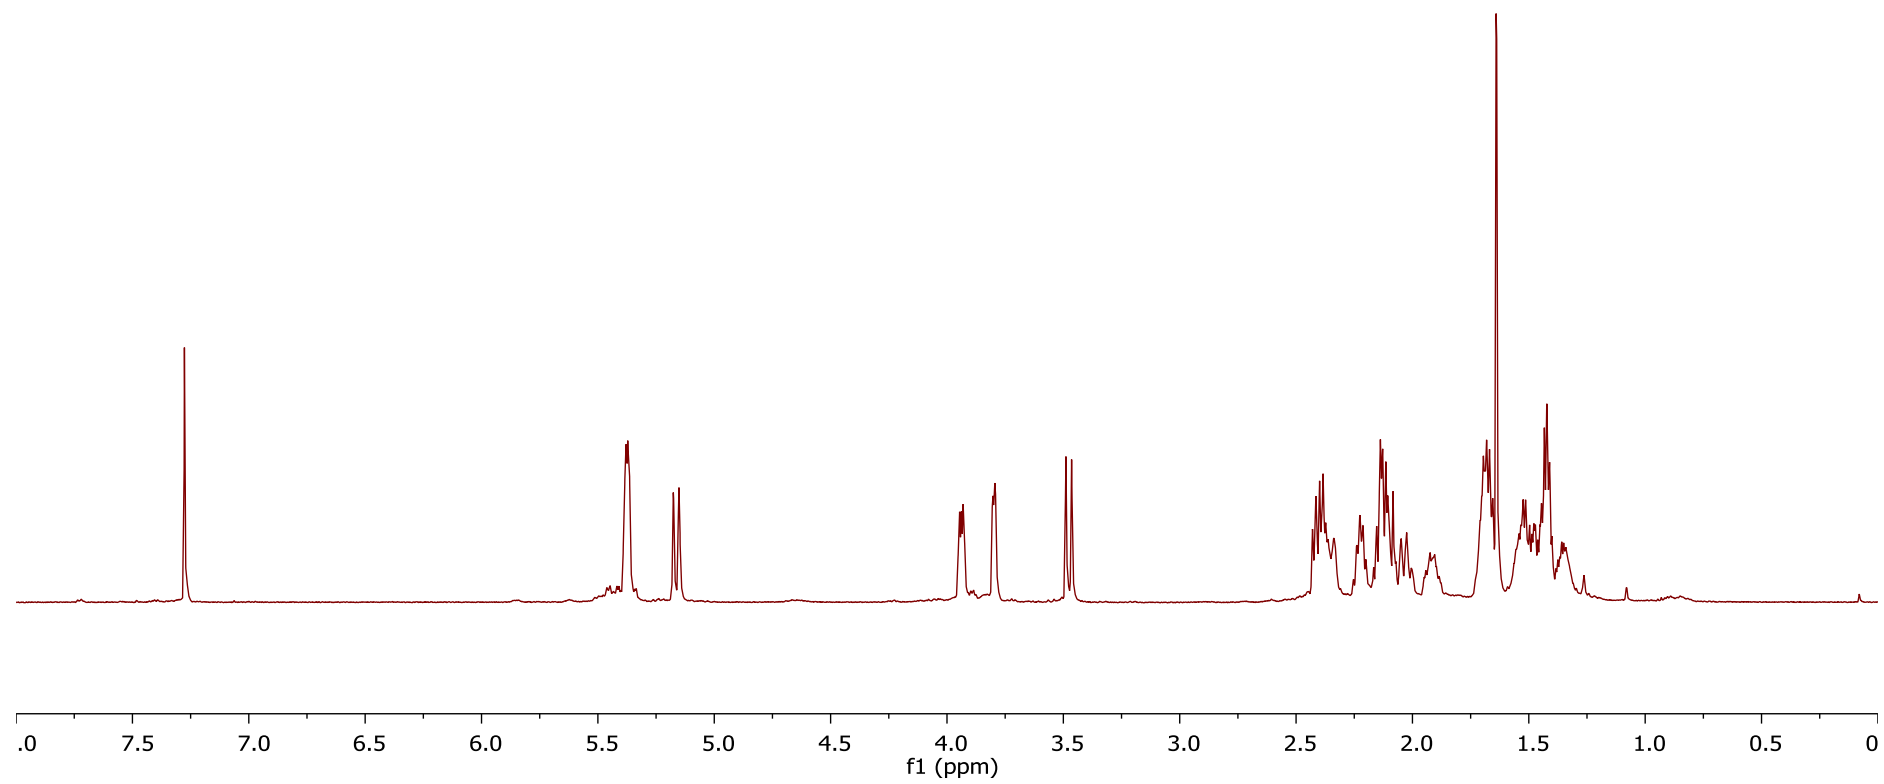

(Z)-(1S,11S,12R,17S)-3,18-Dioxatricyclo[9.6.1.0<sup>12,17</sup>]octadec-8-en-4-one **28**



**28**

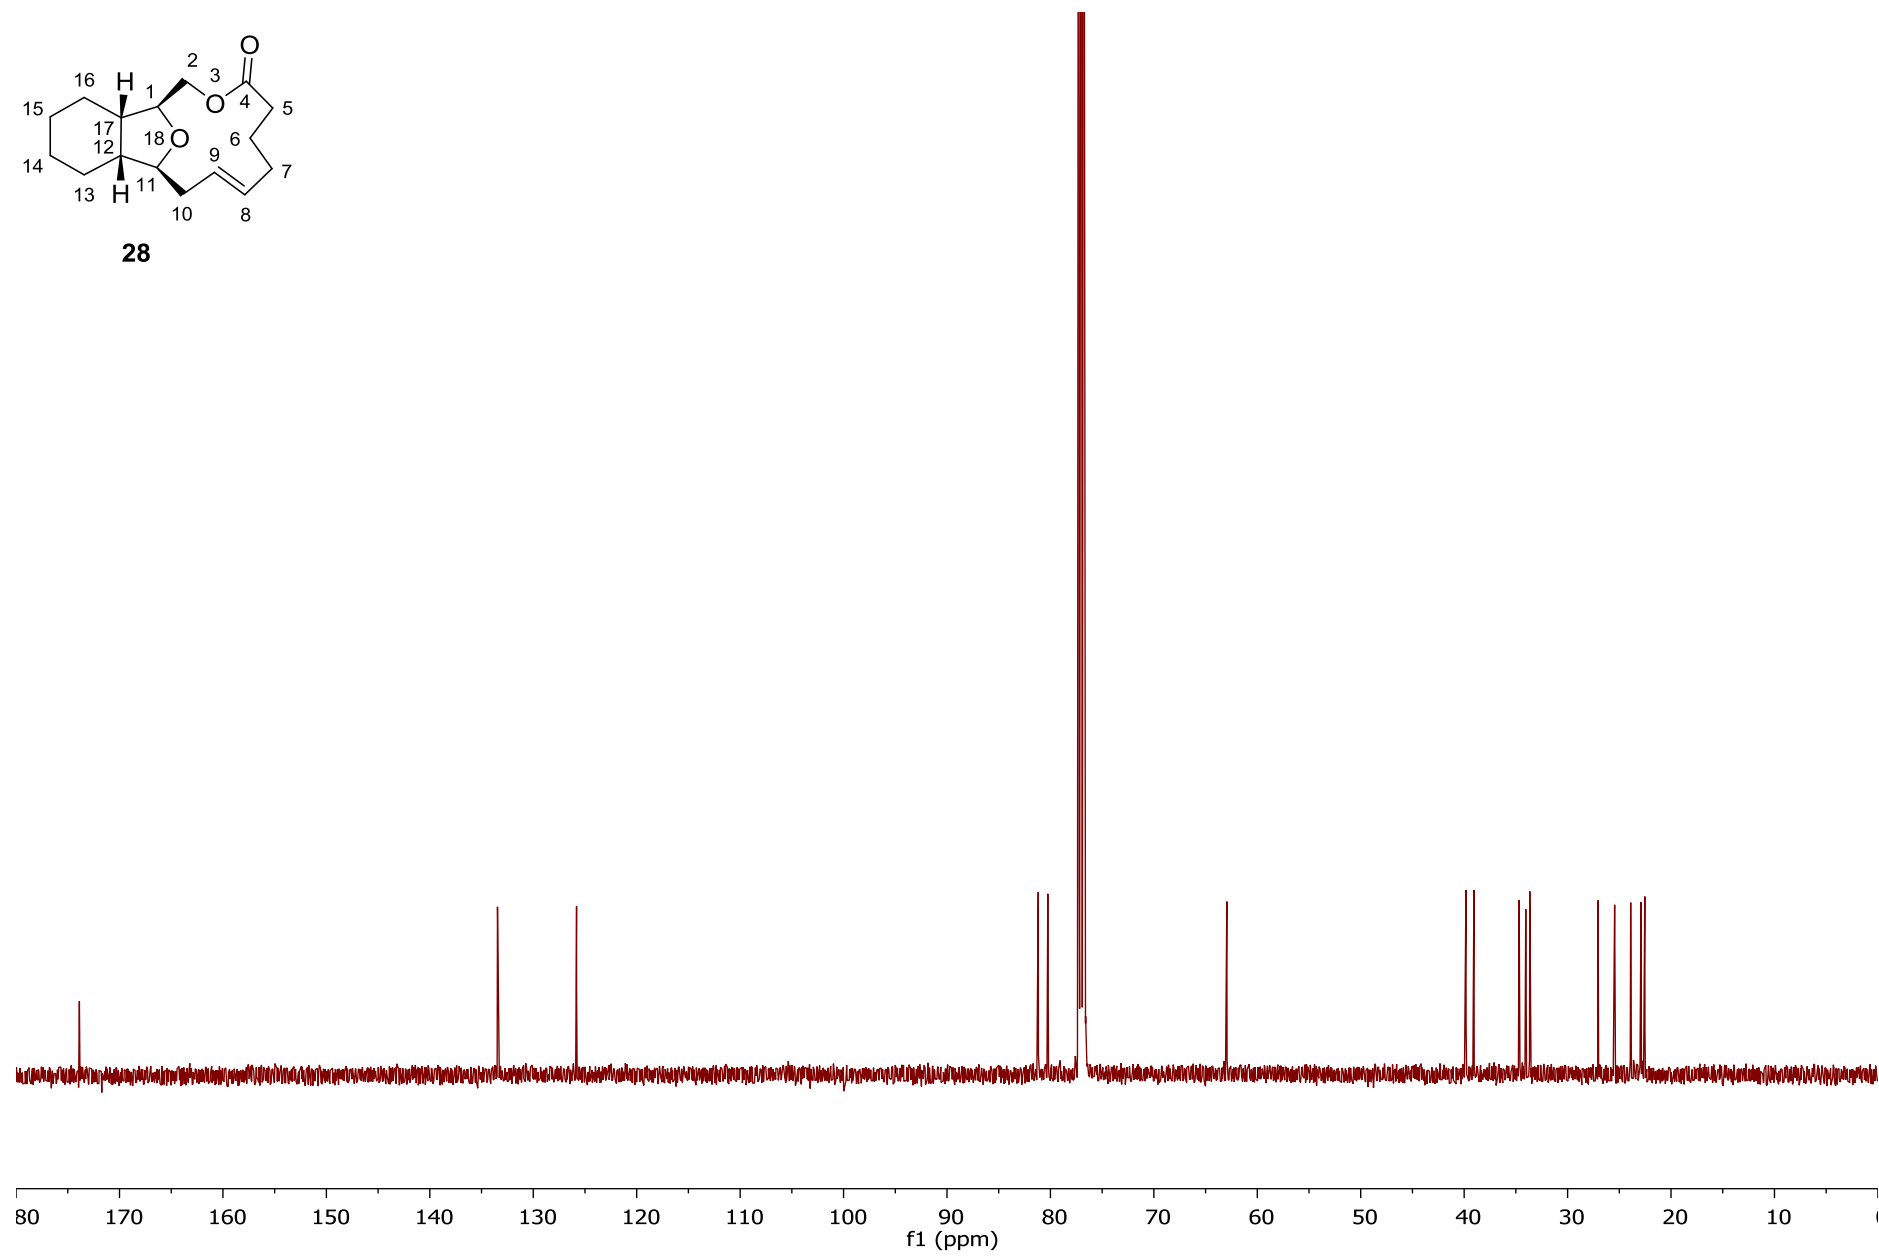

(1*S*,3*S*,3*aS*,7*aR*)-1-Allyl-3-(allyloxymethyl)-1,3,3*a*,4,7,7*a*-hexahydroisobenzofuran **29**

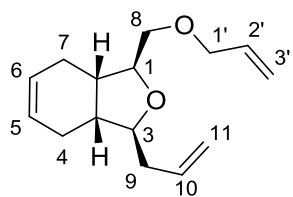

**29**

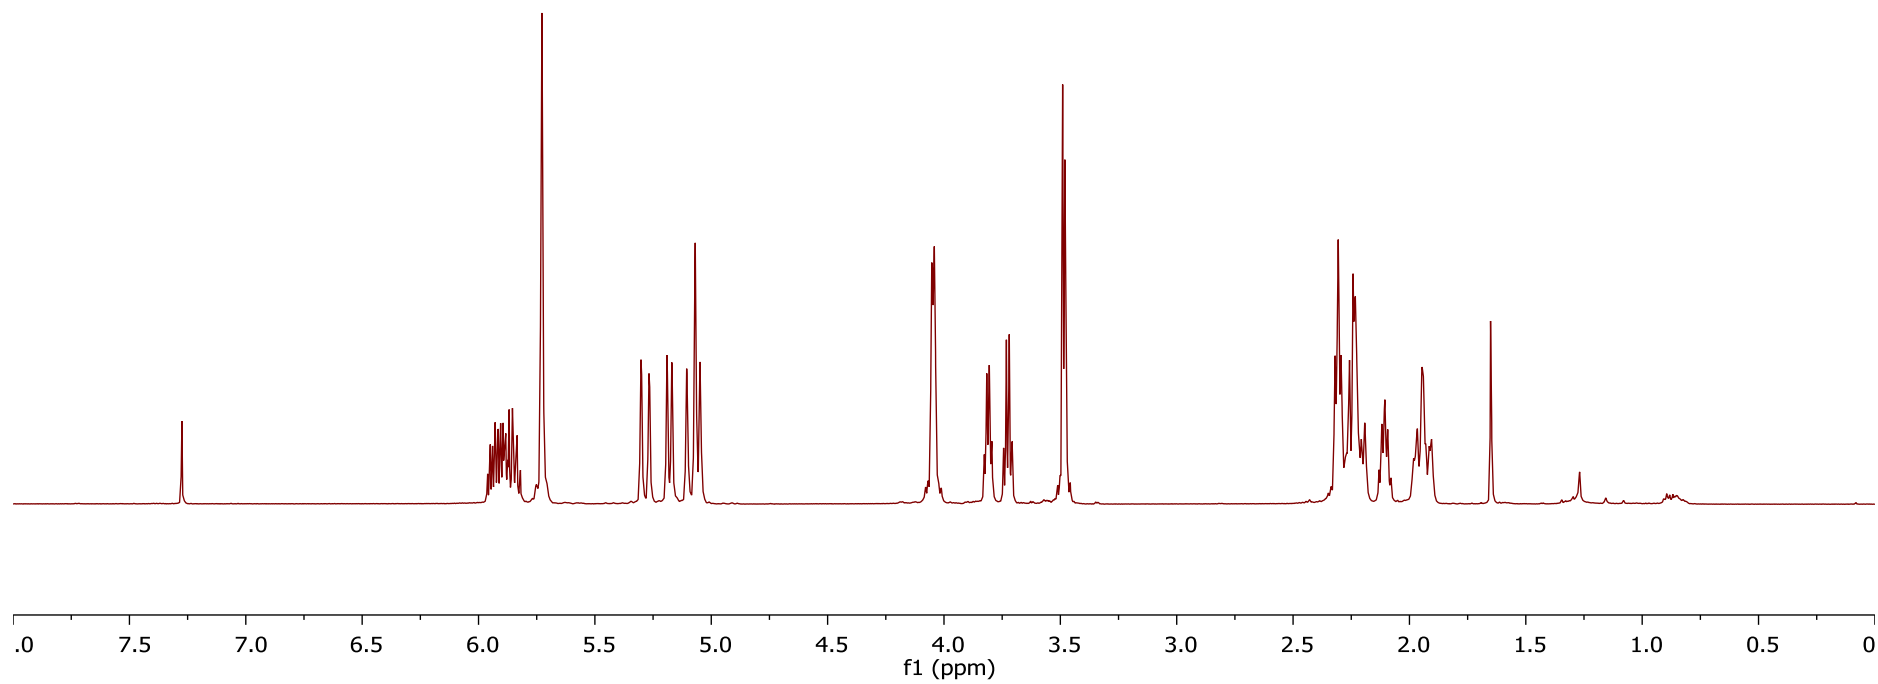

(1*S*,3*S*,3*aS*,7*aR*)-1-Allyl-3-(allyloxymethyl)-1,3,3*a*,4,7,7*a*-hexahydroisobenzofuran **29**

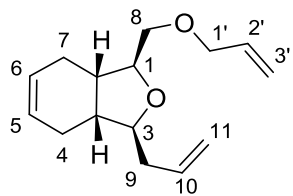

**29**

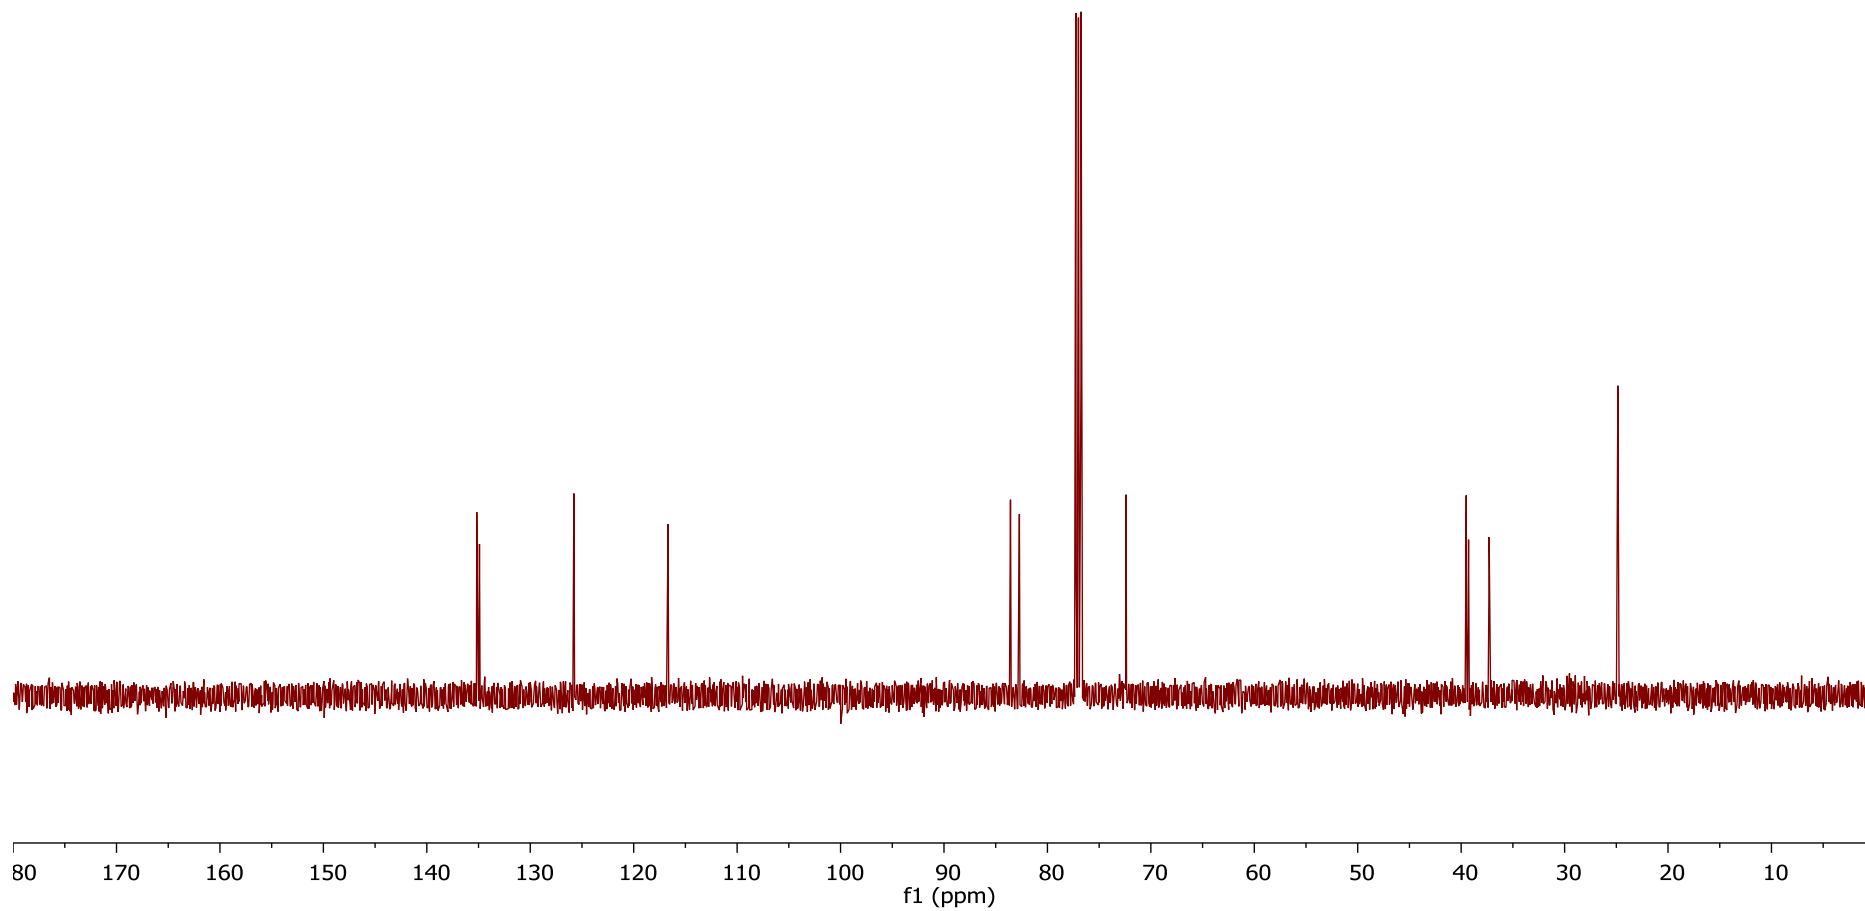

(3aR,4aR,7S,7aS,8aS)-7-(*tert*-Butyldiphenylsilyloxymethyl)-2,2-dimethyl-hexahydro-furo[3',4':4,5]benzo[1,2-d][1,3]dioxol-5-one **31**

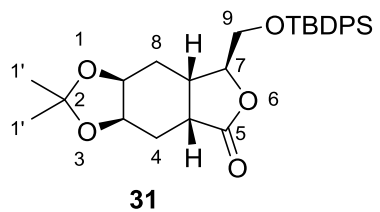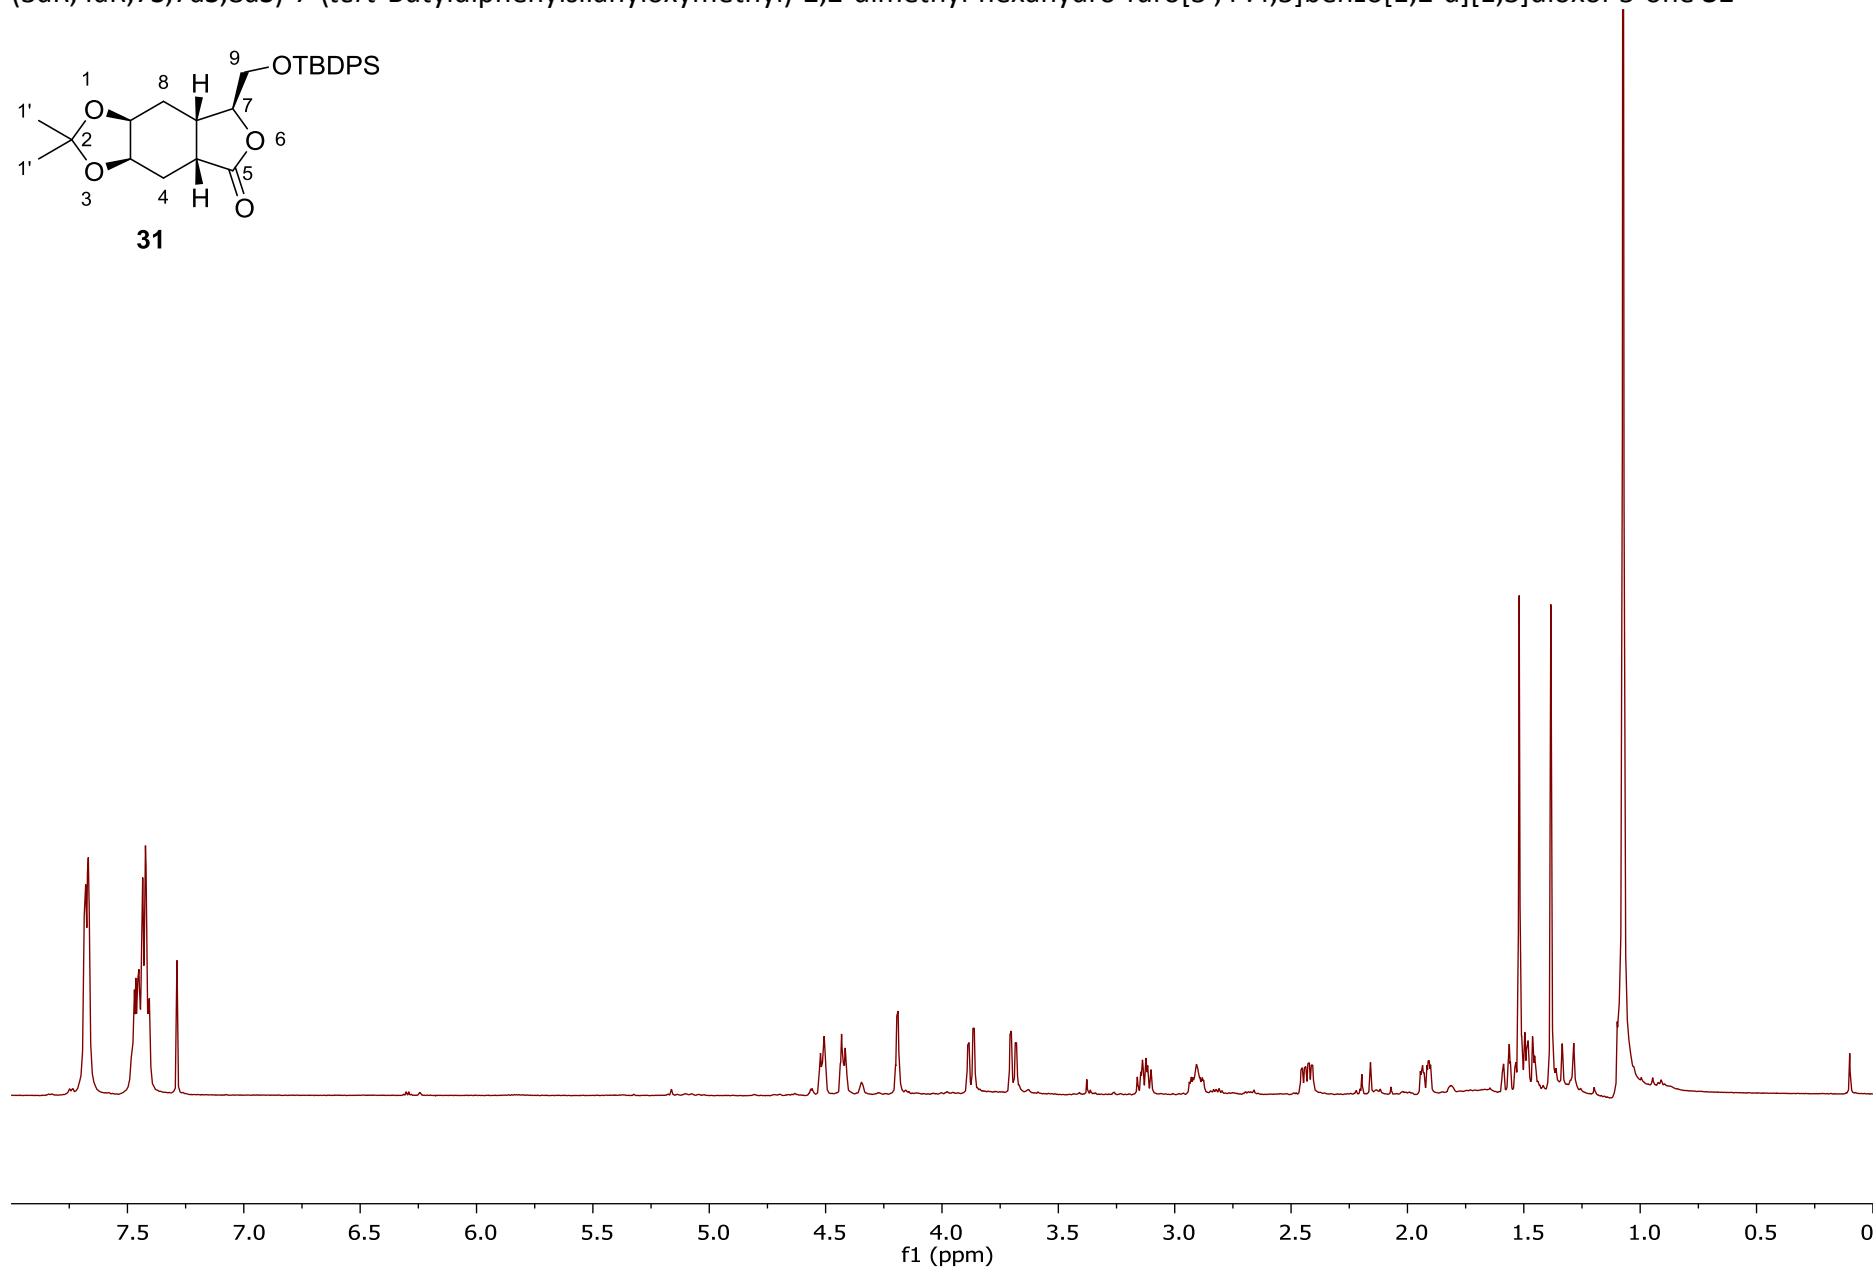

(3aR,4aR,7S,7aS,8aS)-7-(*tert*-Butyldiphenylsilyloxy)methyl)-2,2-dimethyl-hexahydro-furo[3',4':4,5]benzo[1,2-d][1,3]dioxol-5-one **31**

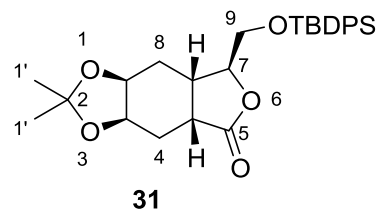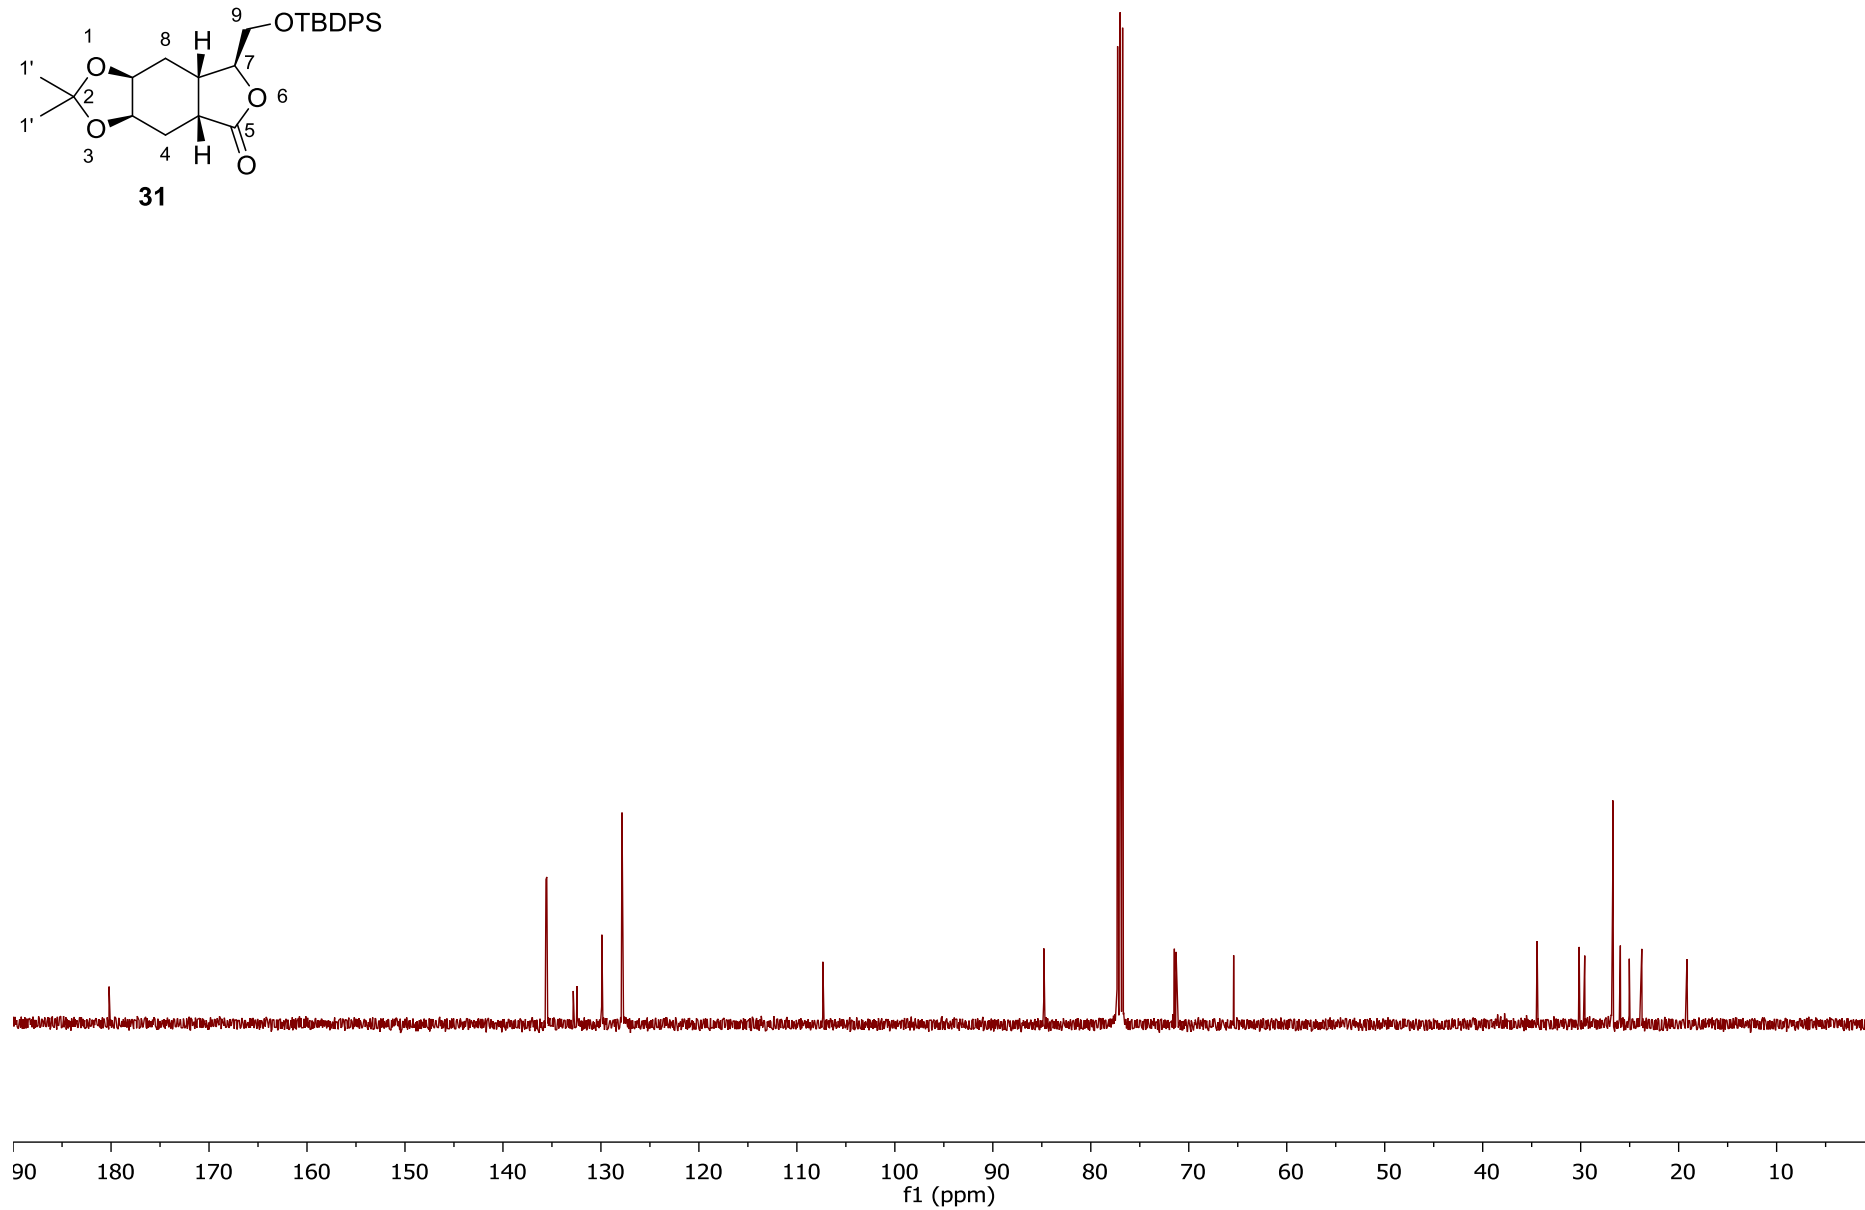



(3aR,4aR,7S,7aS,8aS)-7-(*tert*-Butyldiphenylsilyloxymethyl)-2,2-dimethyl-hexahydro-furo[3',4':4,5]benzo[1,2-d][1,3]dioxol-5-one **31**

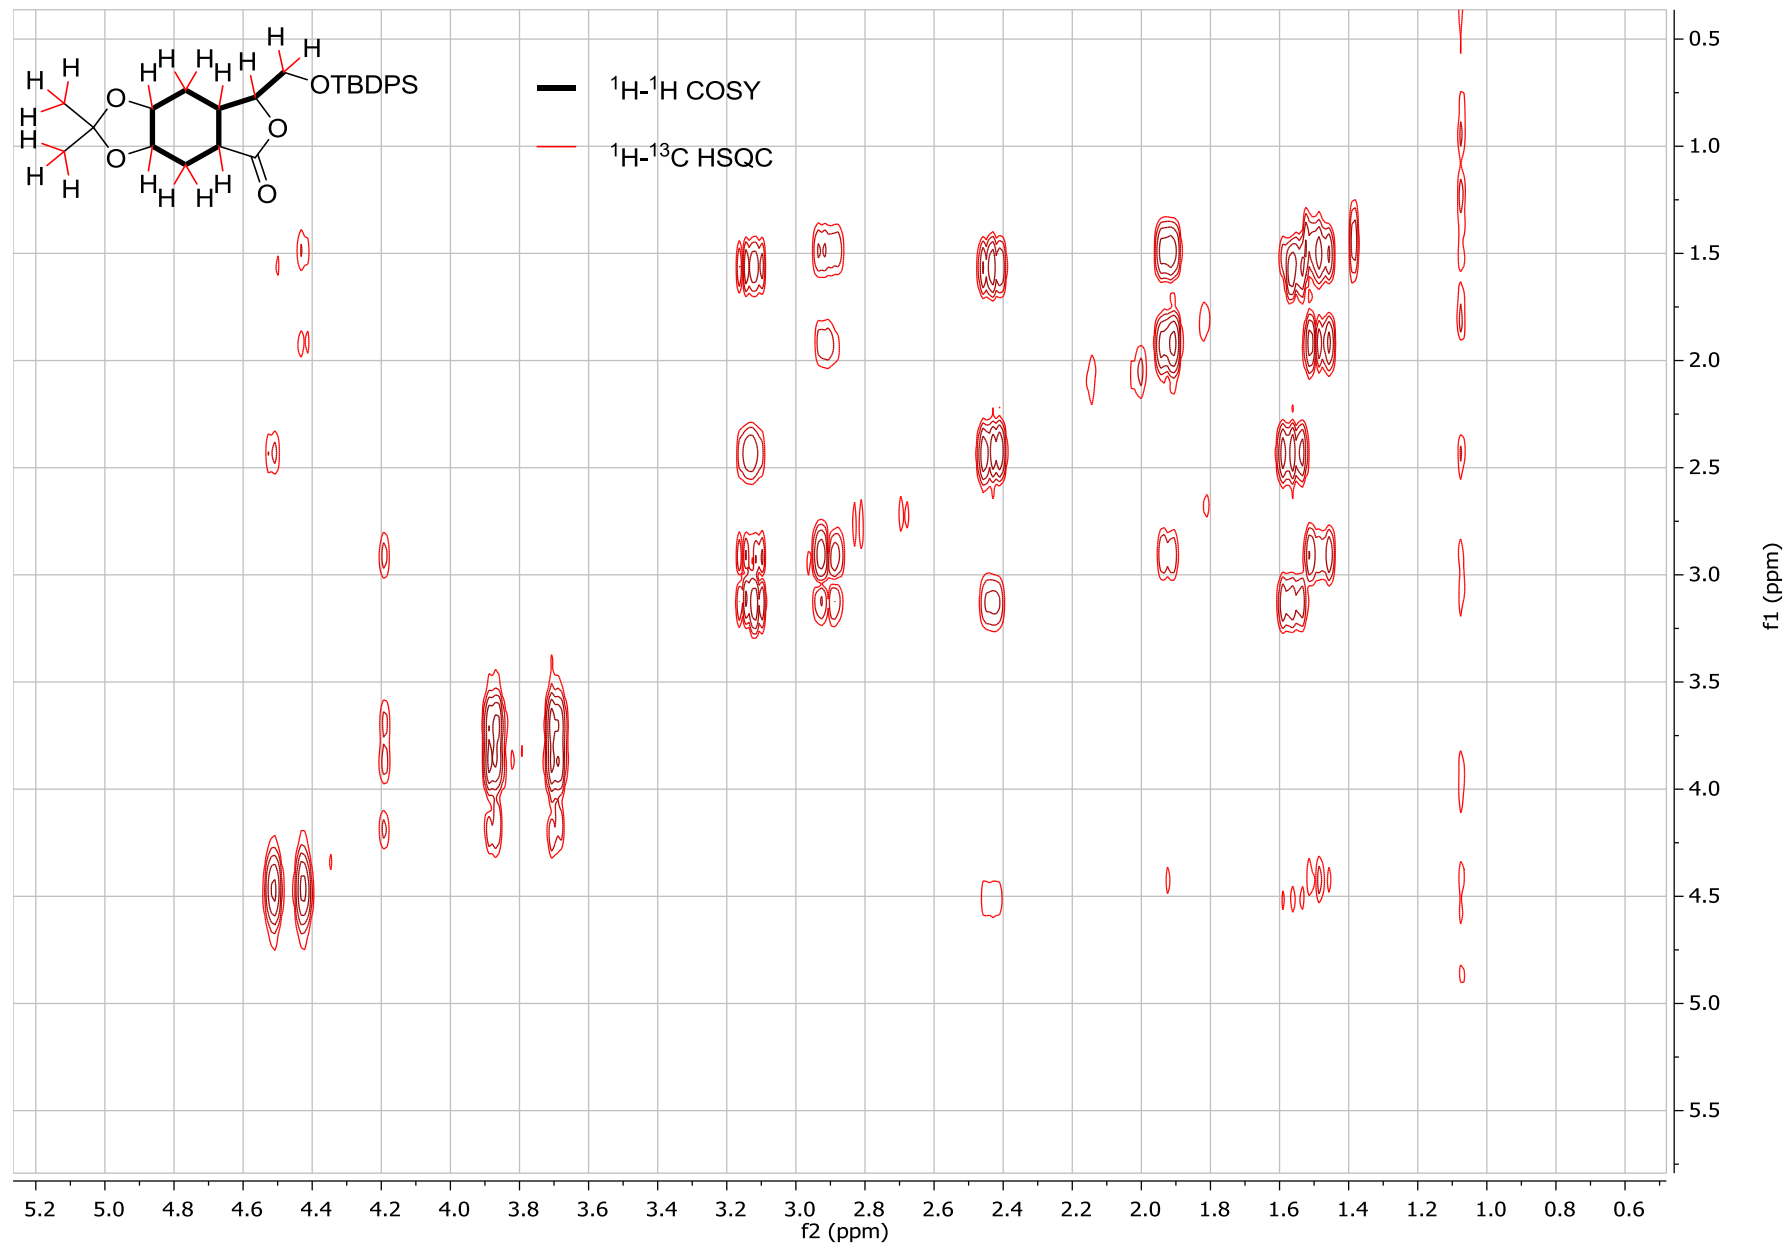

(3aR,4aR,7S,7aS,8aS)-7-(*tert*-Butyldiphenylsilyloxymethyl)-2,2-dimethyl-hexahydro-furo[3',4':4,5]benzo[1,2-d][1,3]dioxol-5-one **31**

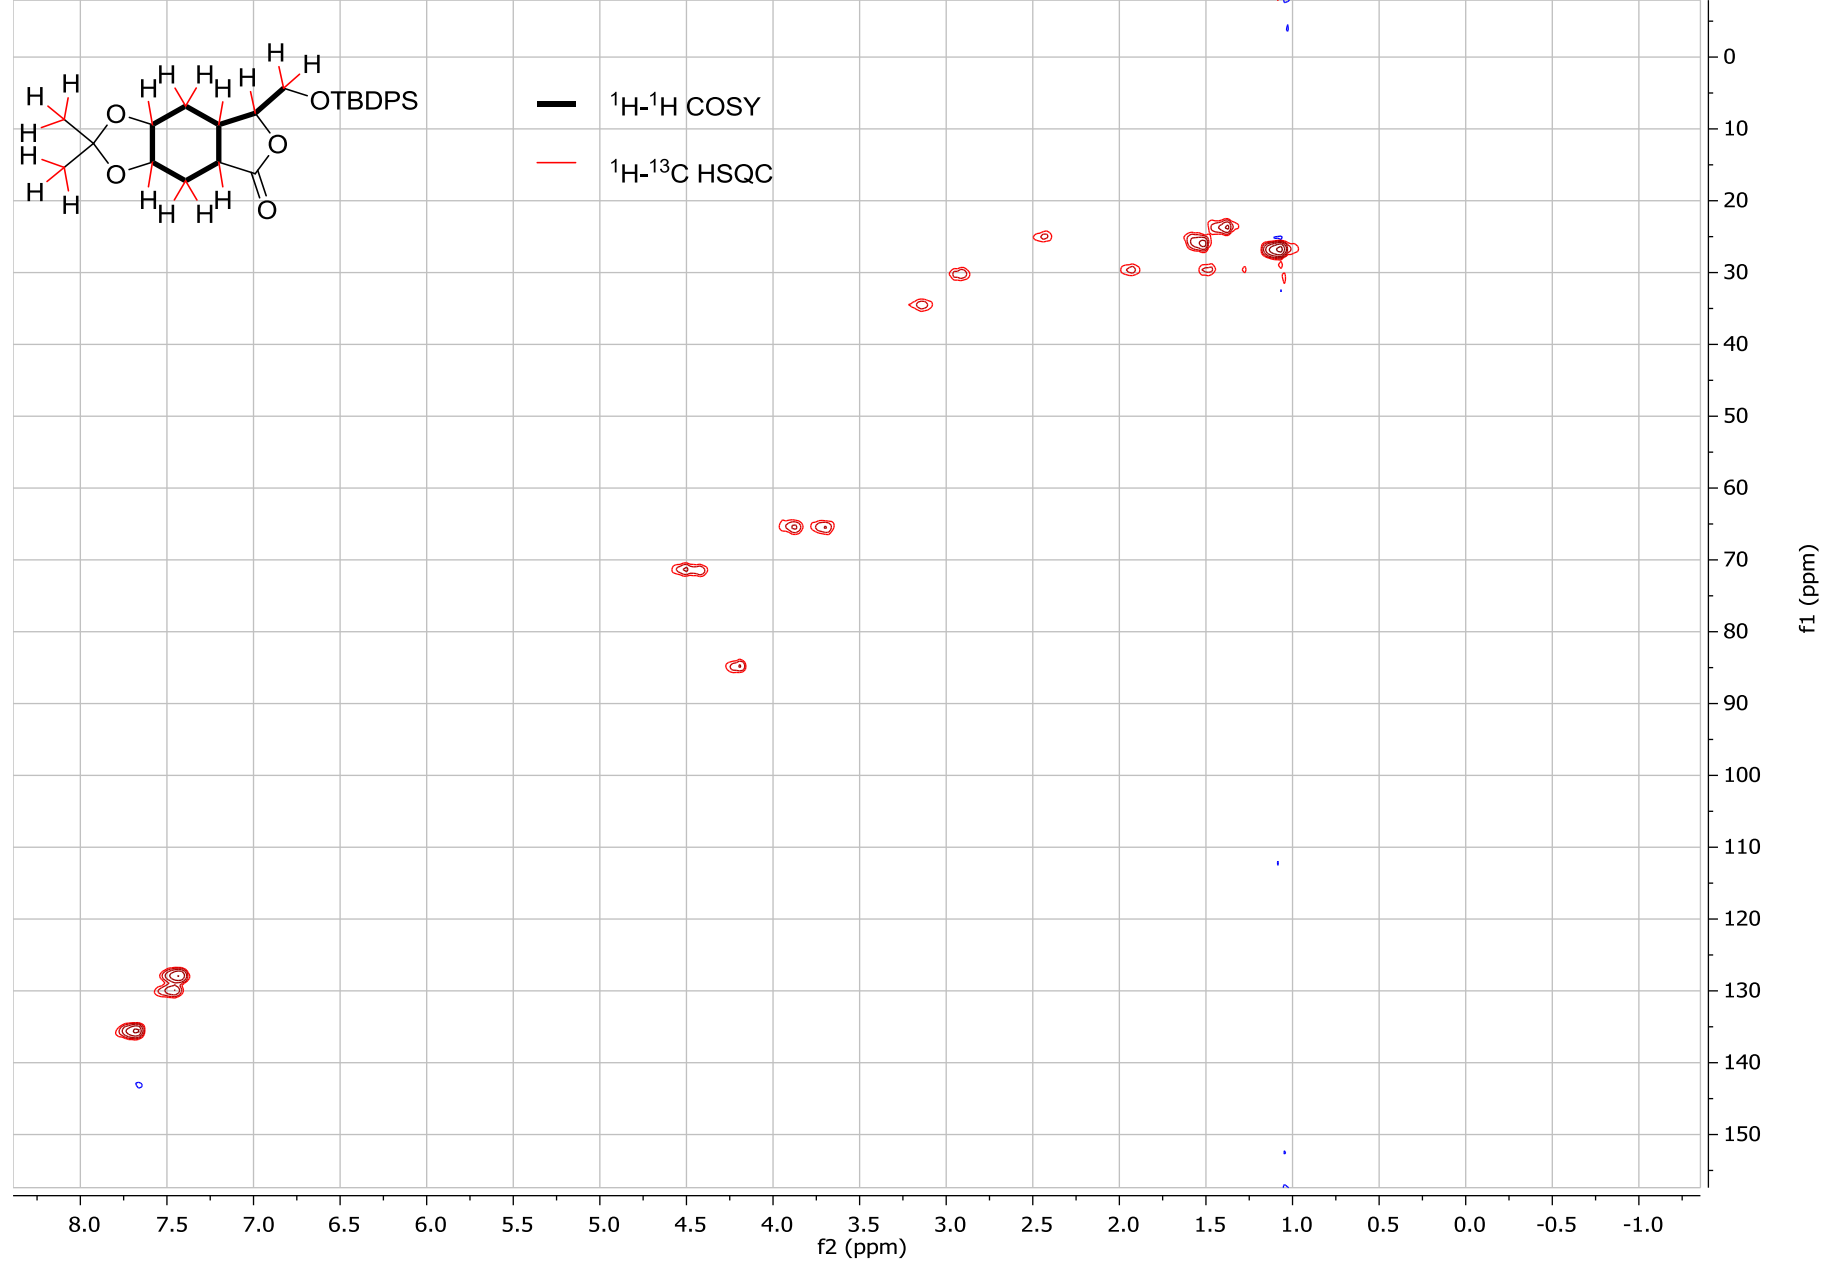

(3aR,4aR,7S,7aS,8aS)-7-(*tert*-Butyldiphenylsilyloxymethyl)-2,2-dimethyloctahydrofuro [3',4':4,5]benzo[1,2-*d*][1,3]dioxol-5-ol **32**

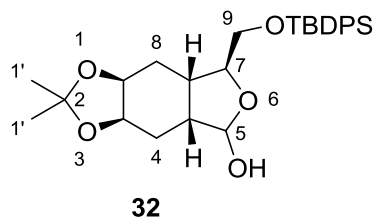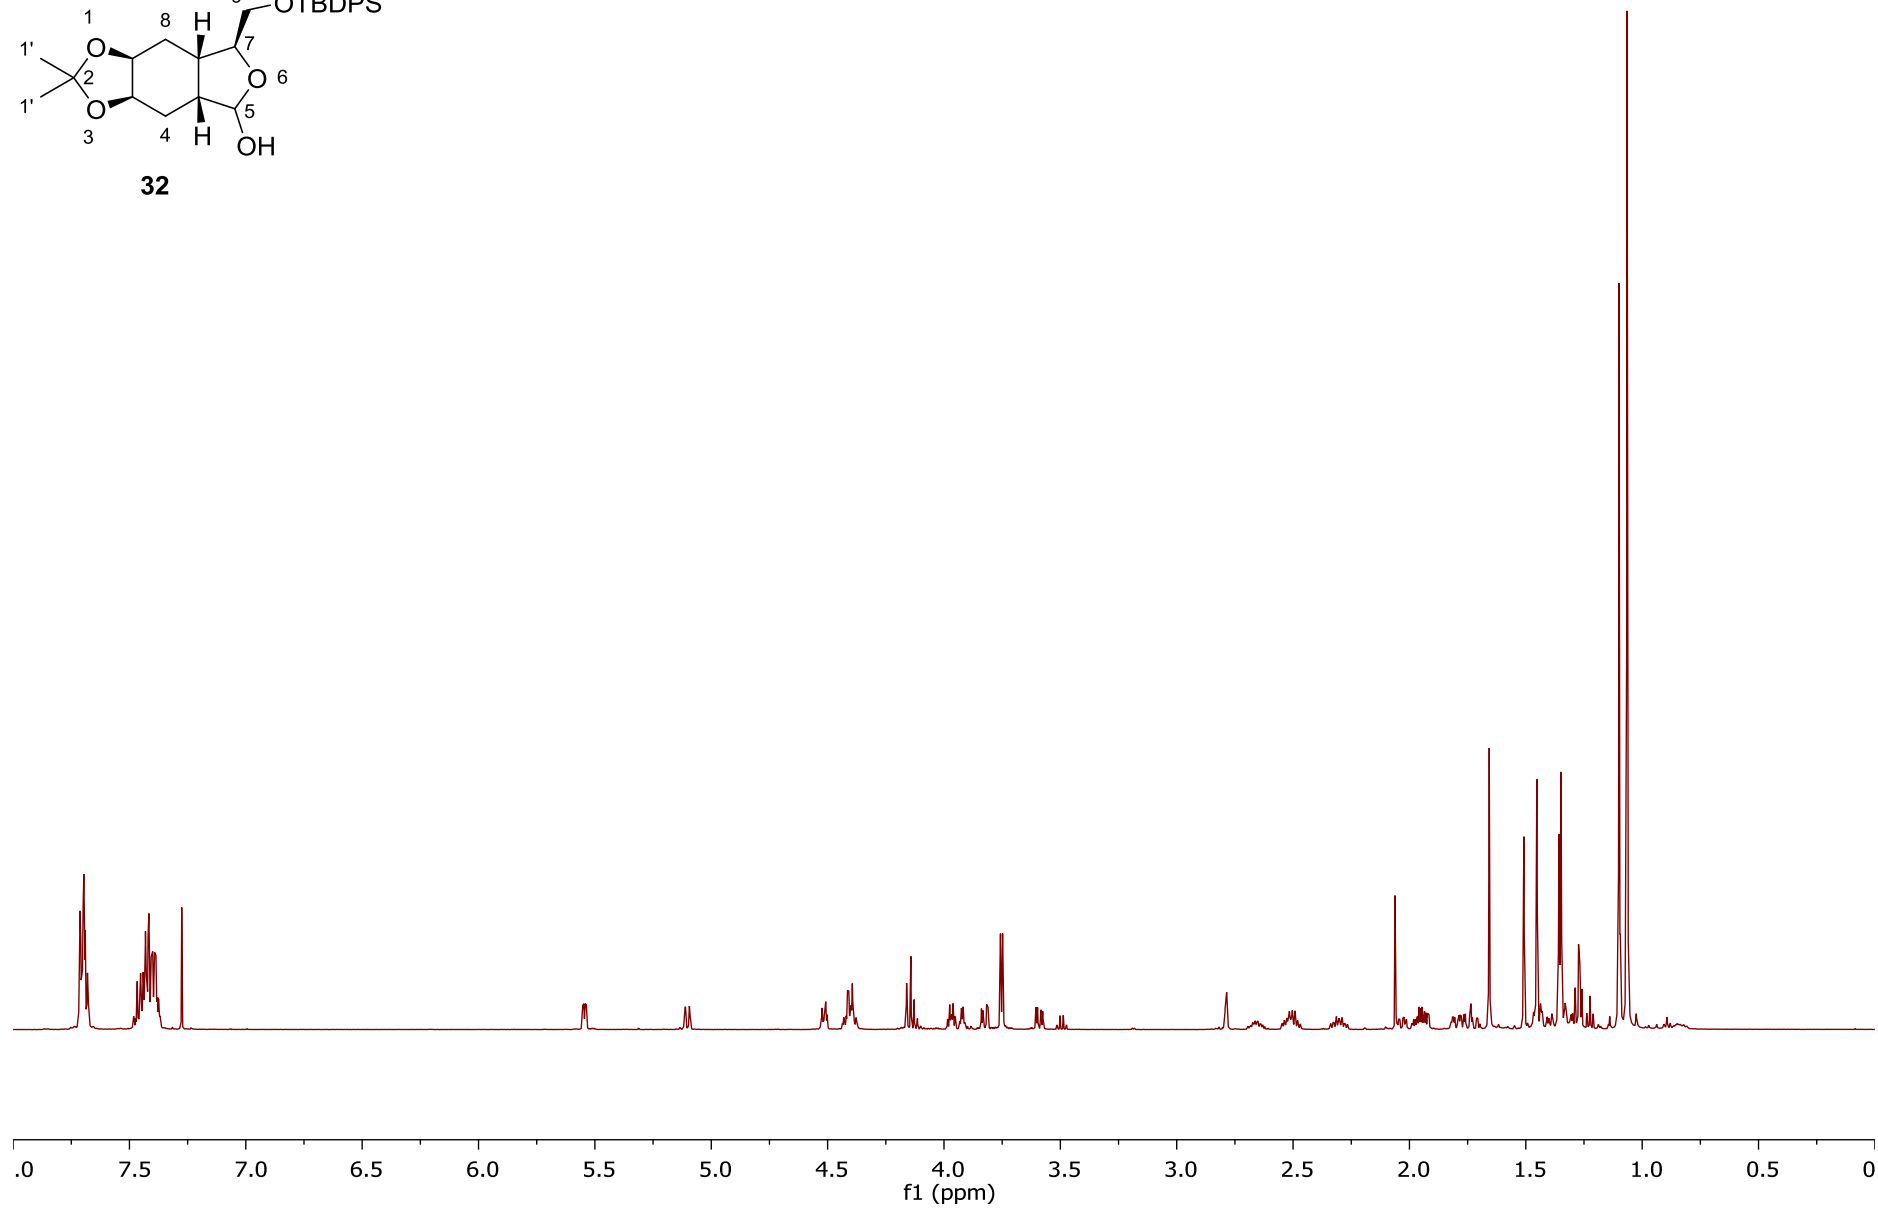

(3aR,4aR,7S,7aS,8aS)-7-(*tert*-Butyldiphenylsilyloxymethyl)-2,2-dimethyloctahydrofuro [3',4':4,5]benzo[1,2-*d*][1,3]dioxol-5-ol **32**

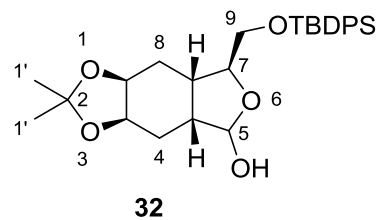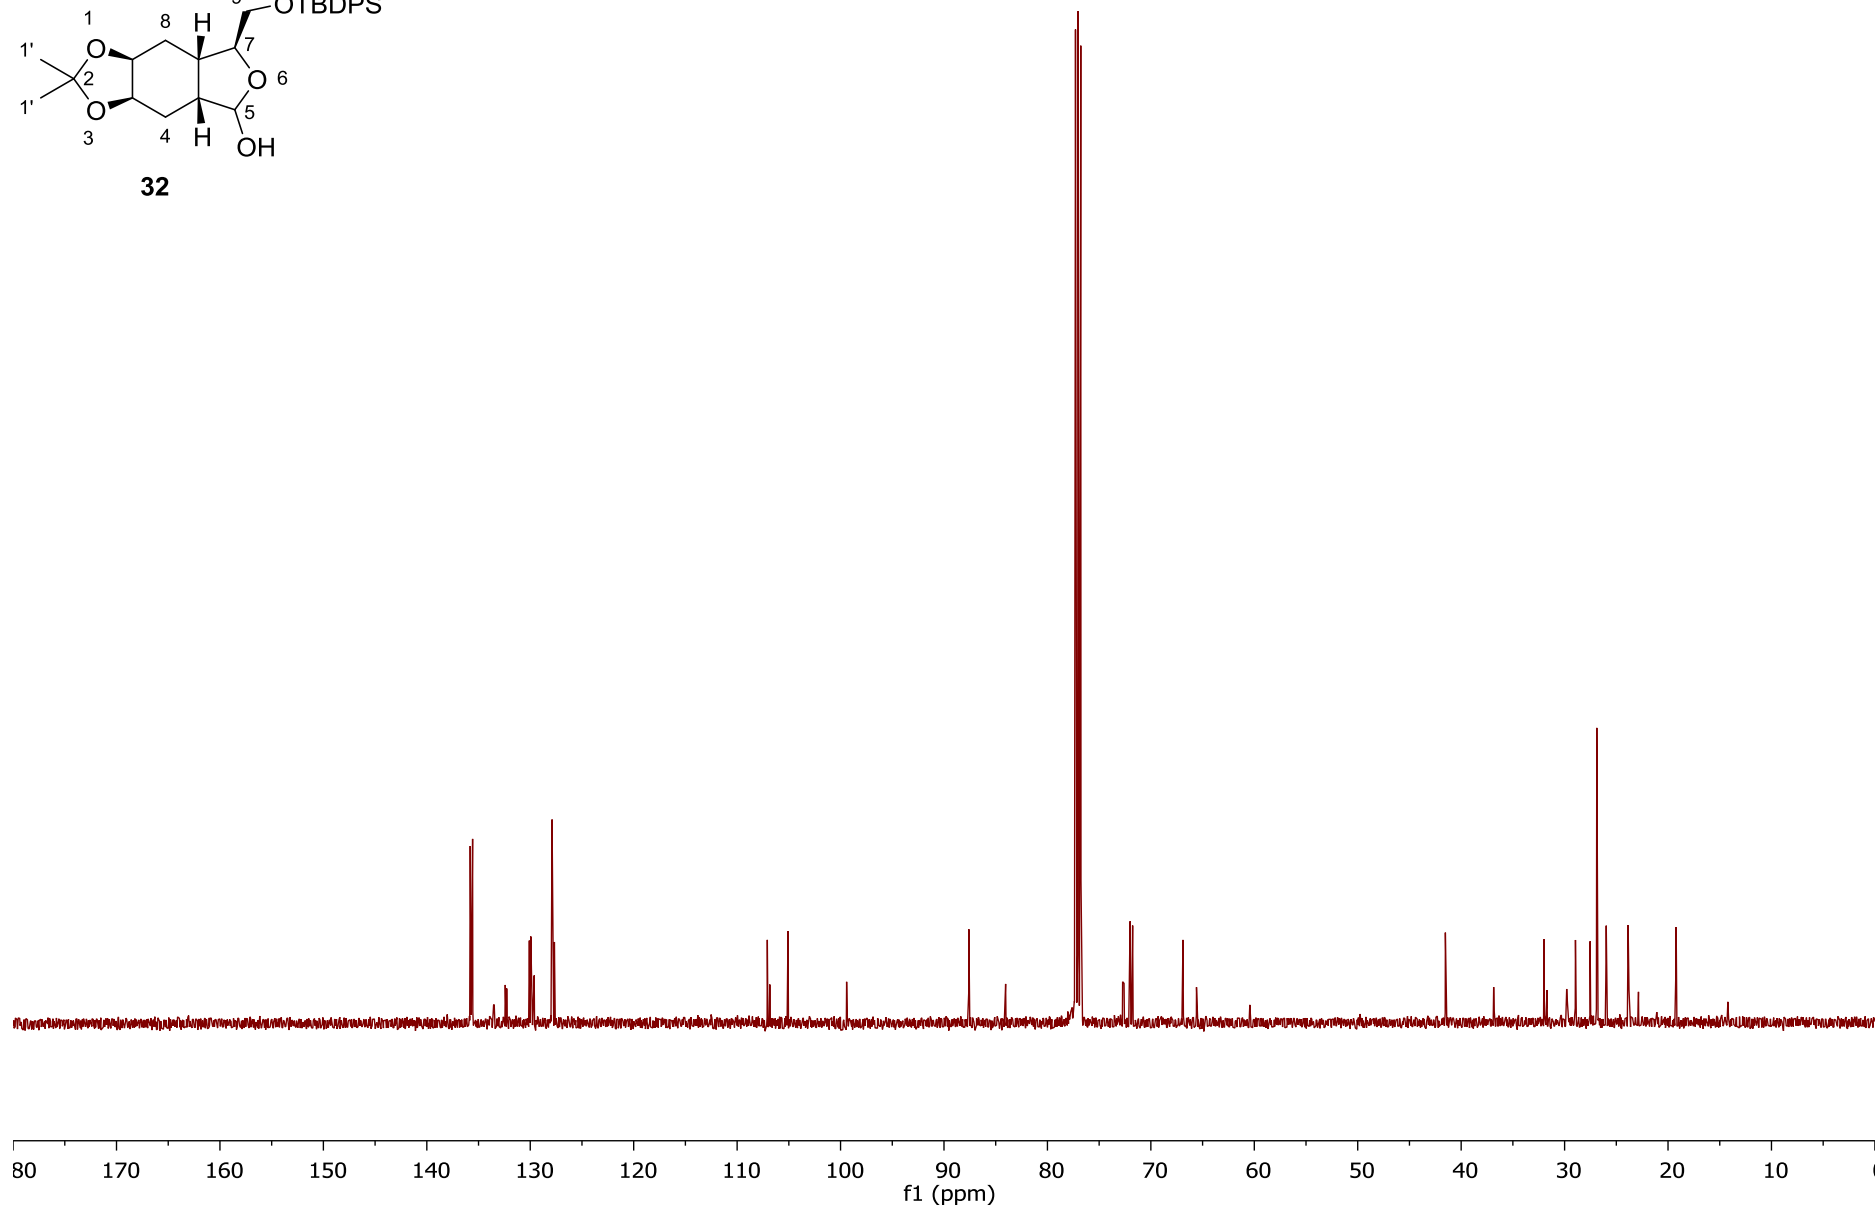

(((3aS,4aS,5S,7S,7aR,8aR)-7-allyl-2,2-dimethyloctahydroisobenzofuro[5,6-d][1,3]dioxol-5-yl)methoxy)(tert-butyl)diphenylsilane **33a**

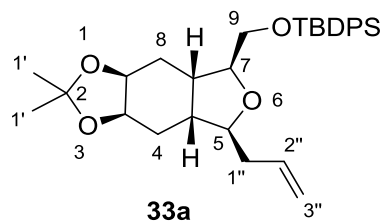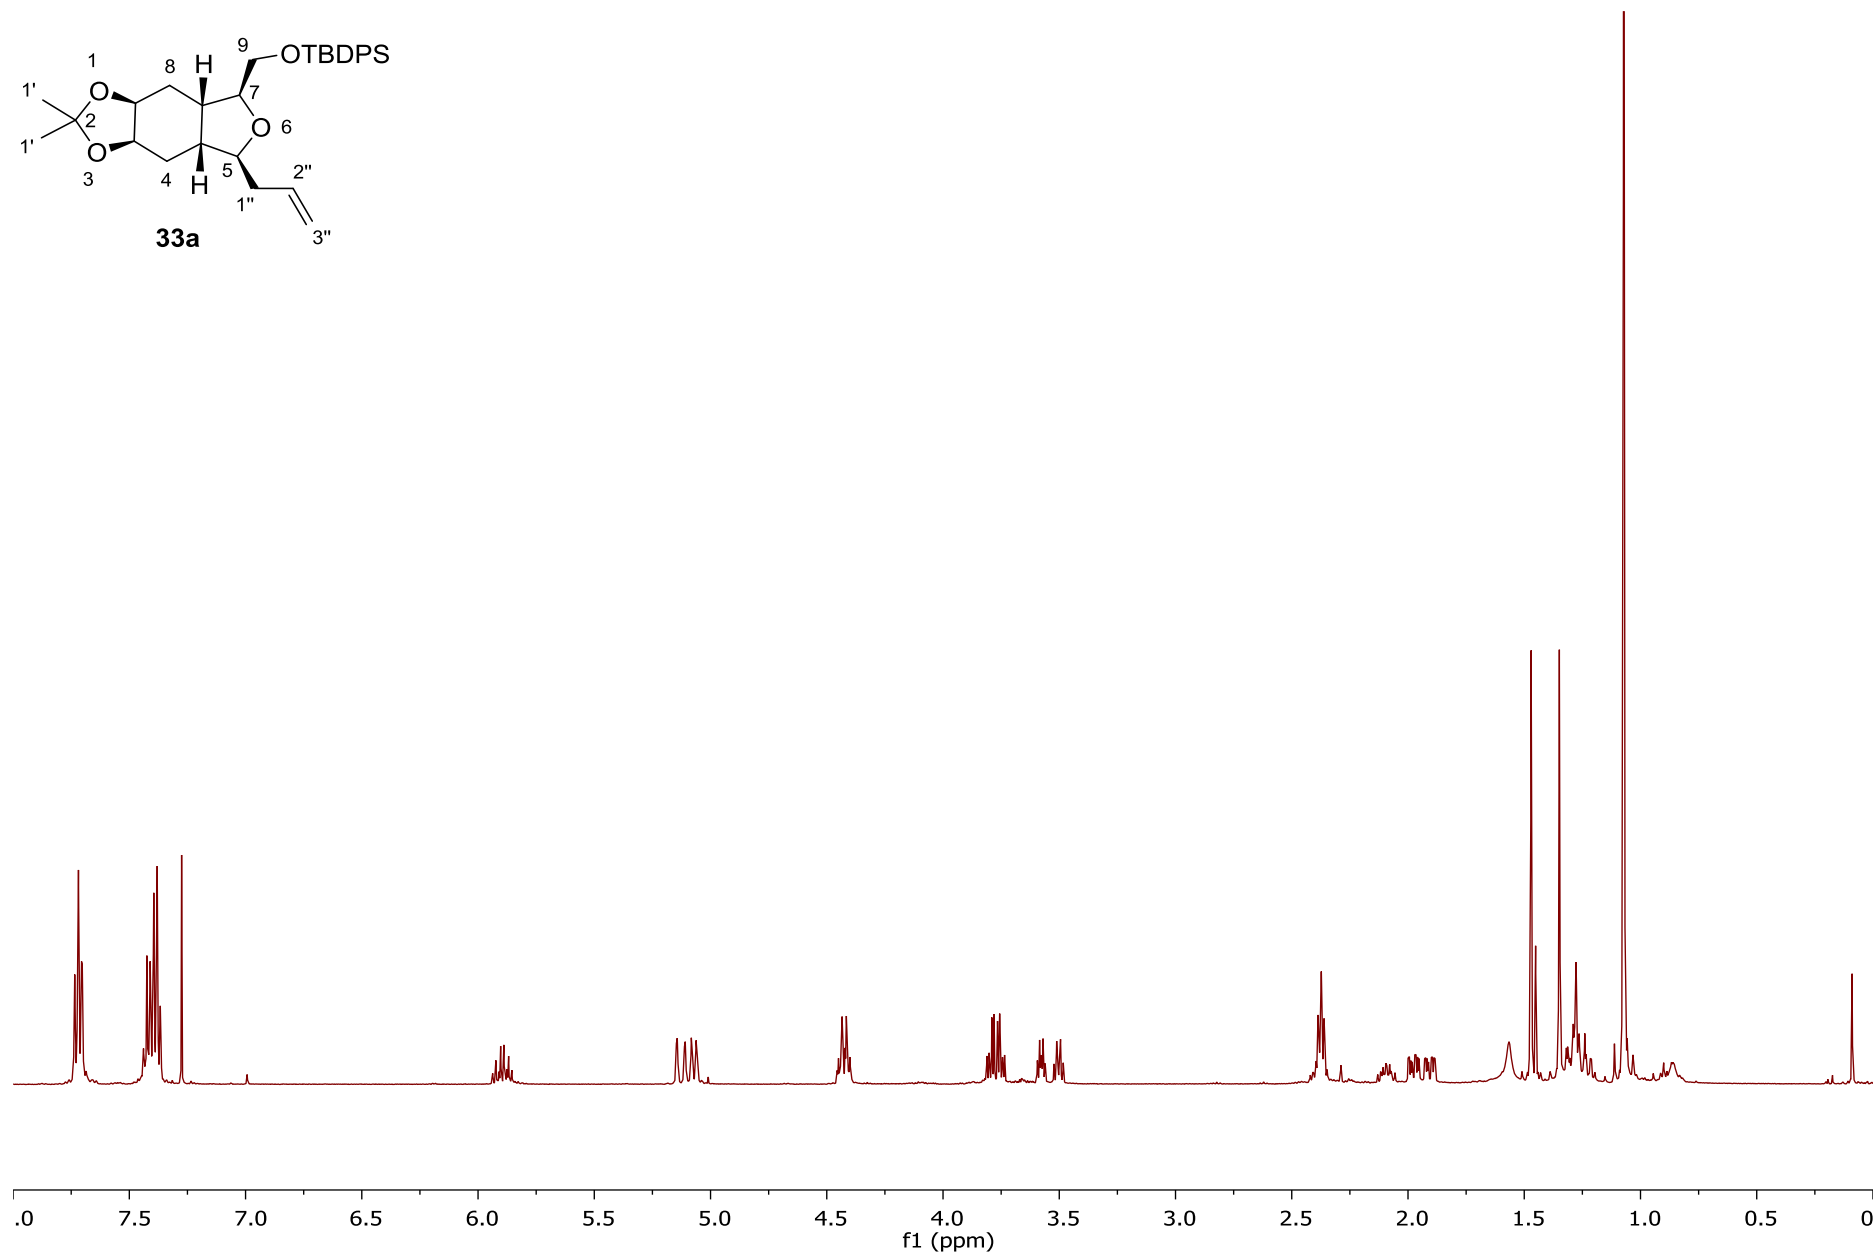

(((3aS,4aS,5S,7S,7aR,8aR)-7-allyl-2,2-dimethyloctahydroisobenzofuro[5,6-d][1,3]dioxol-5-yl)methoxy)(tert-butyl)diphenylsilane **33a**

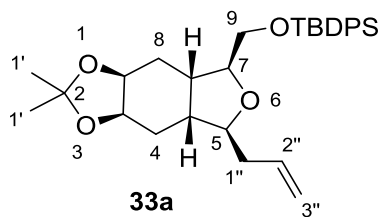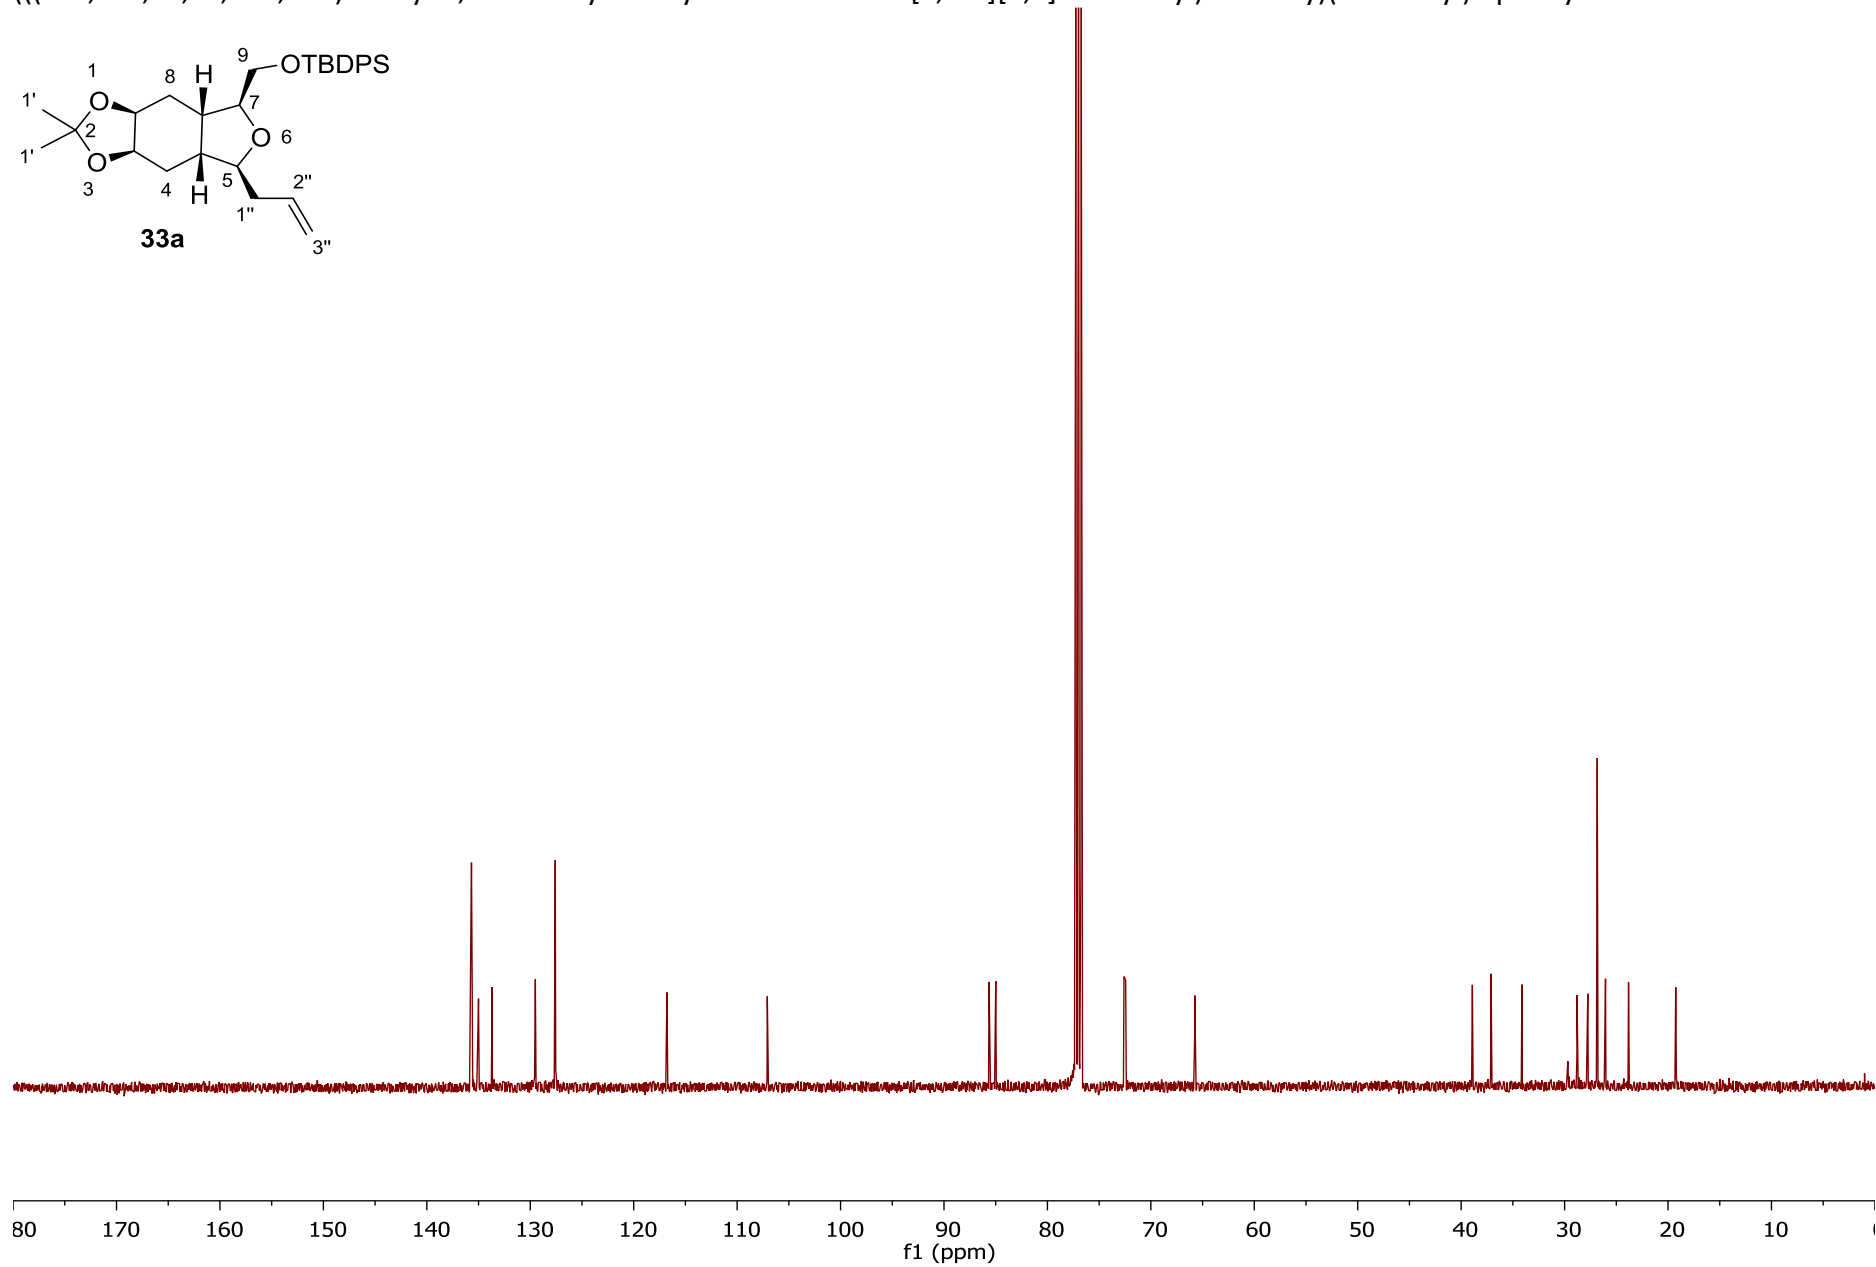

((3aS,4aS,5S,7S,7aR,8aR)-7-allyl-2,2-dimethyloctahydroisobenzofuro[5,6-d][1,3]dioxol-5-yl)methanol **33**

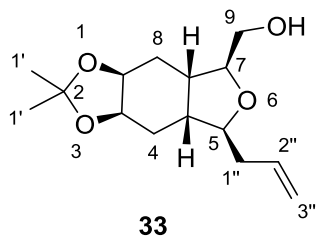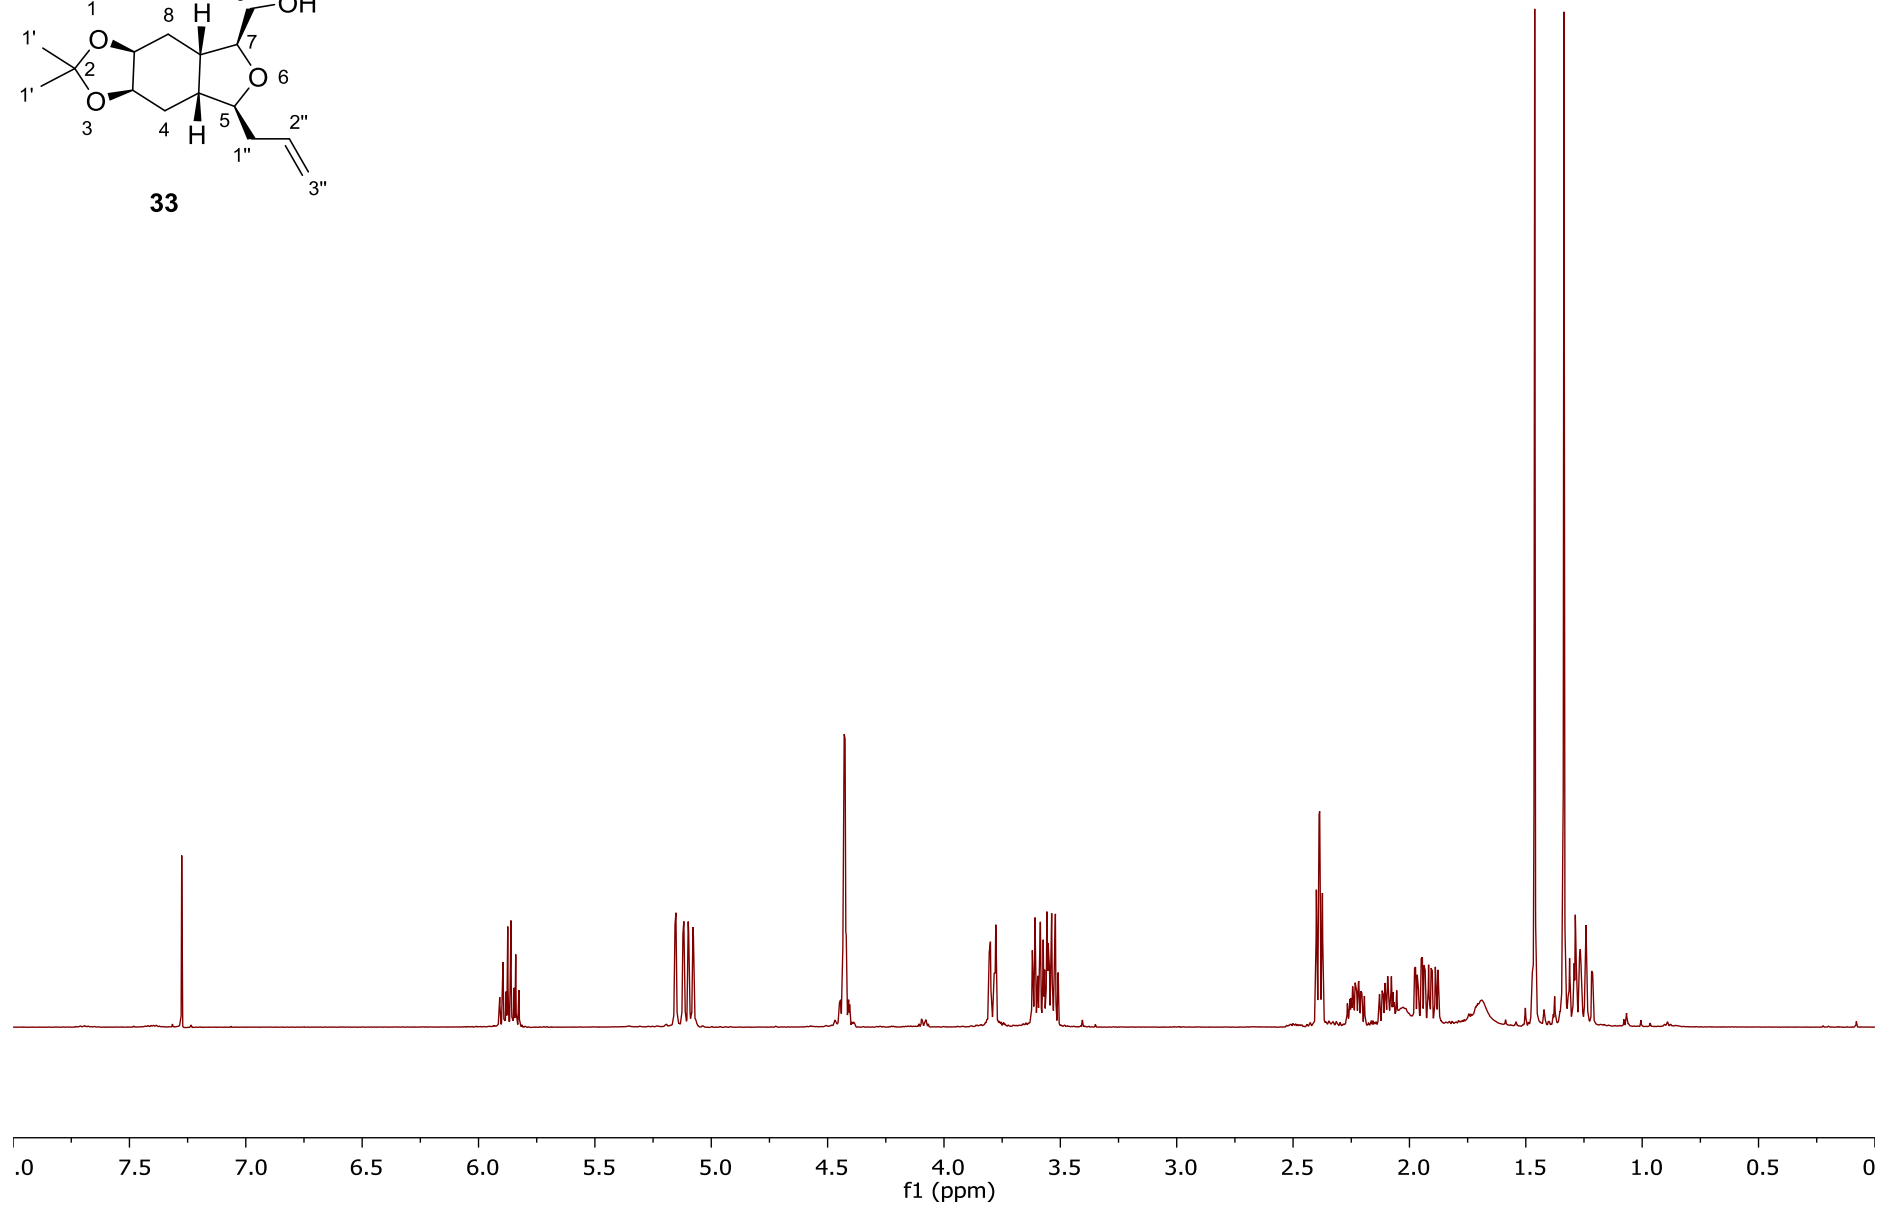

((3aS,4aS,5S,7S,7aR,8aR)-7-allyl-2,2-dimethyloctahydroisobenzofuro[5,6-d][1,3]dioxol-5-yl)methanol **33**

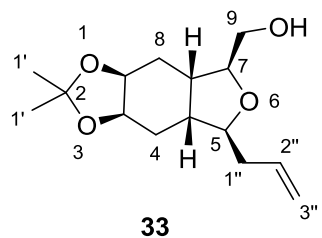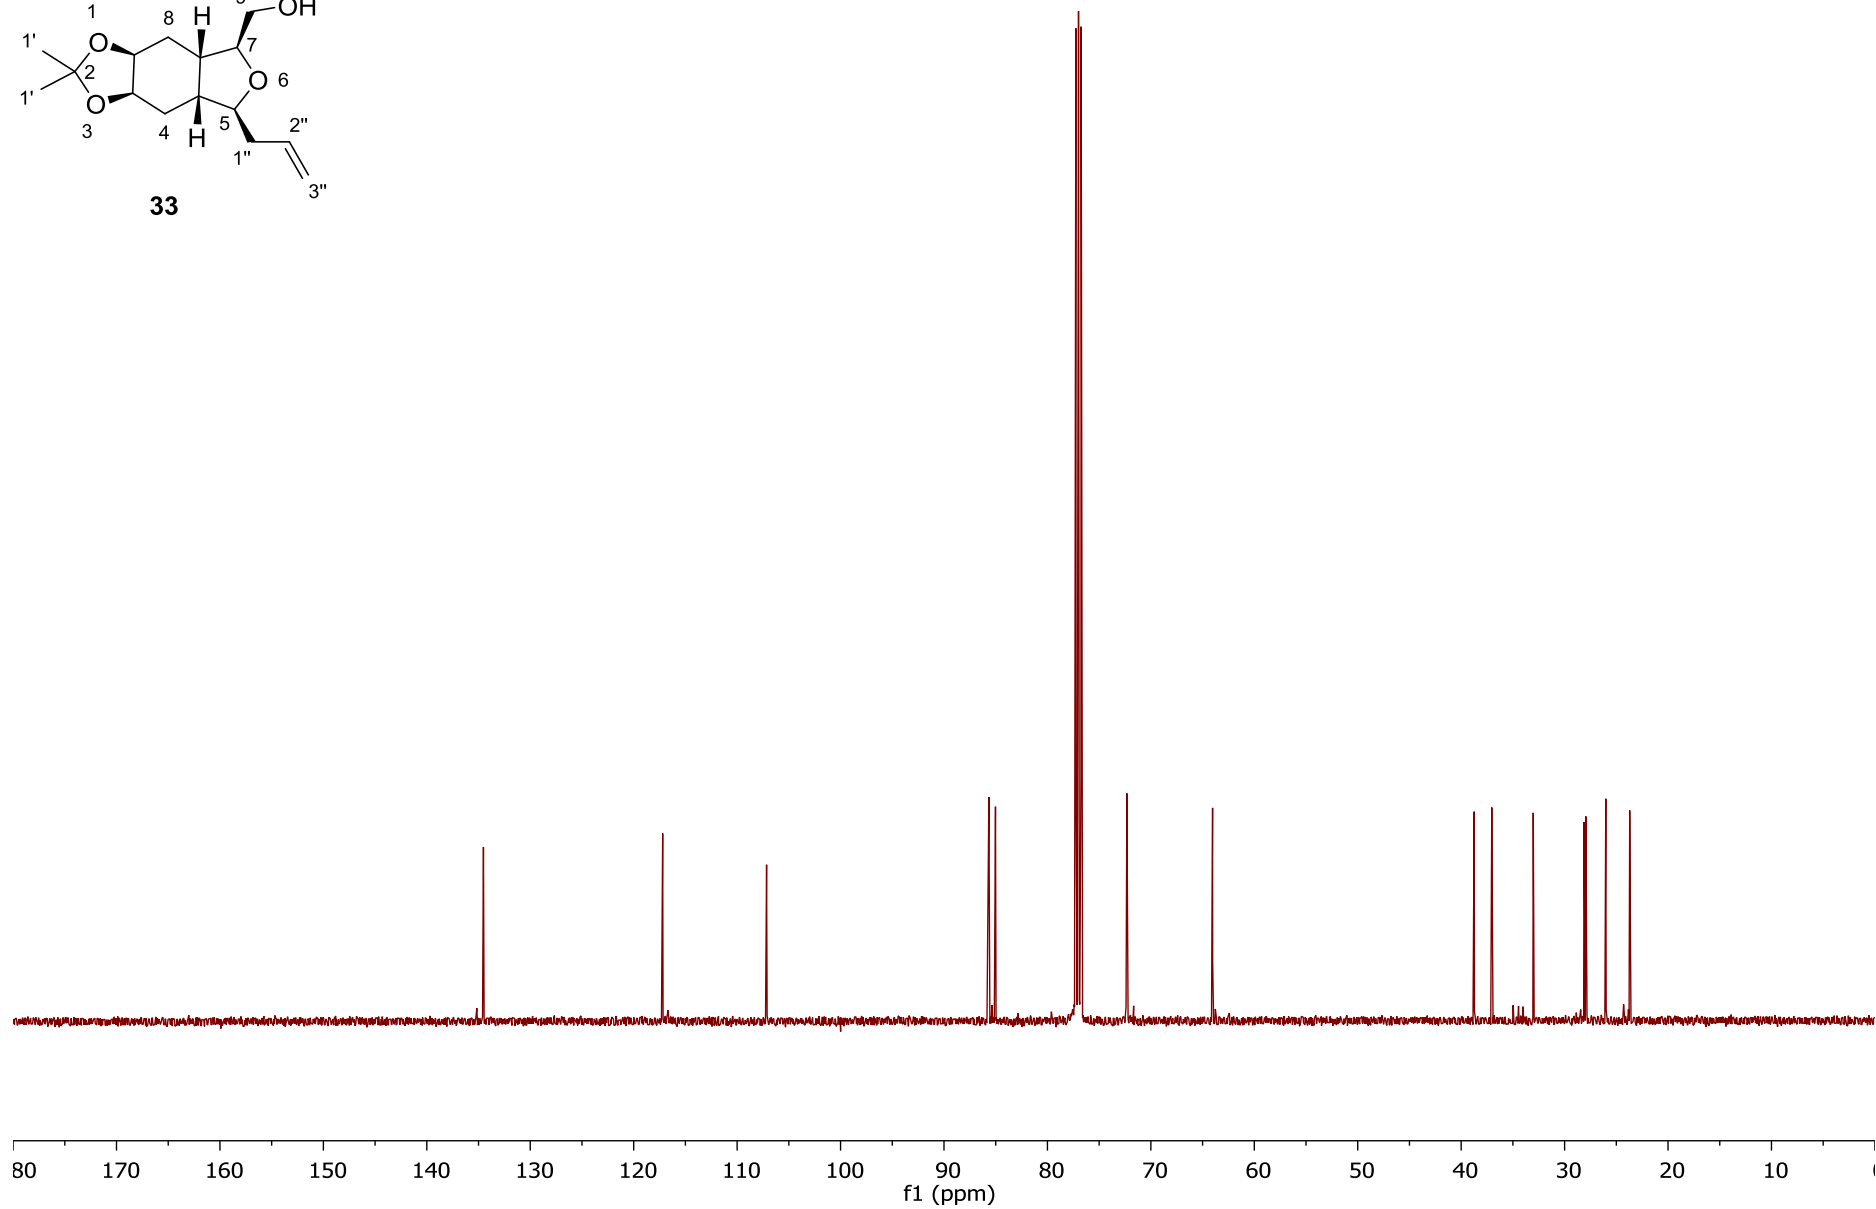



((3aS,4aS,5S,7S,7aR,8aR)-7-allyl-2,2-dimethyloctahydroisobenzofuro[5,6-d][1,3]dioxol-5-yl)methyl hex-5-enoate **34**

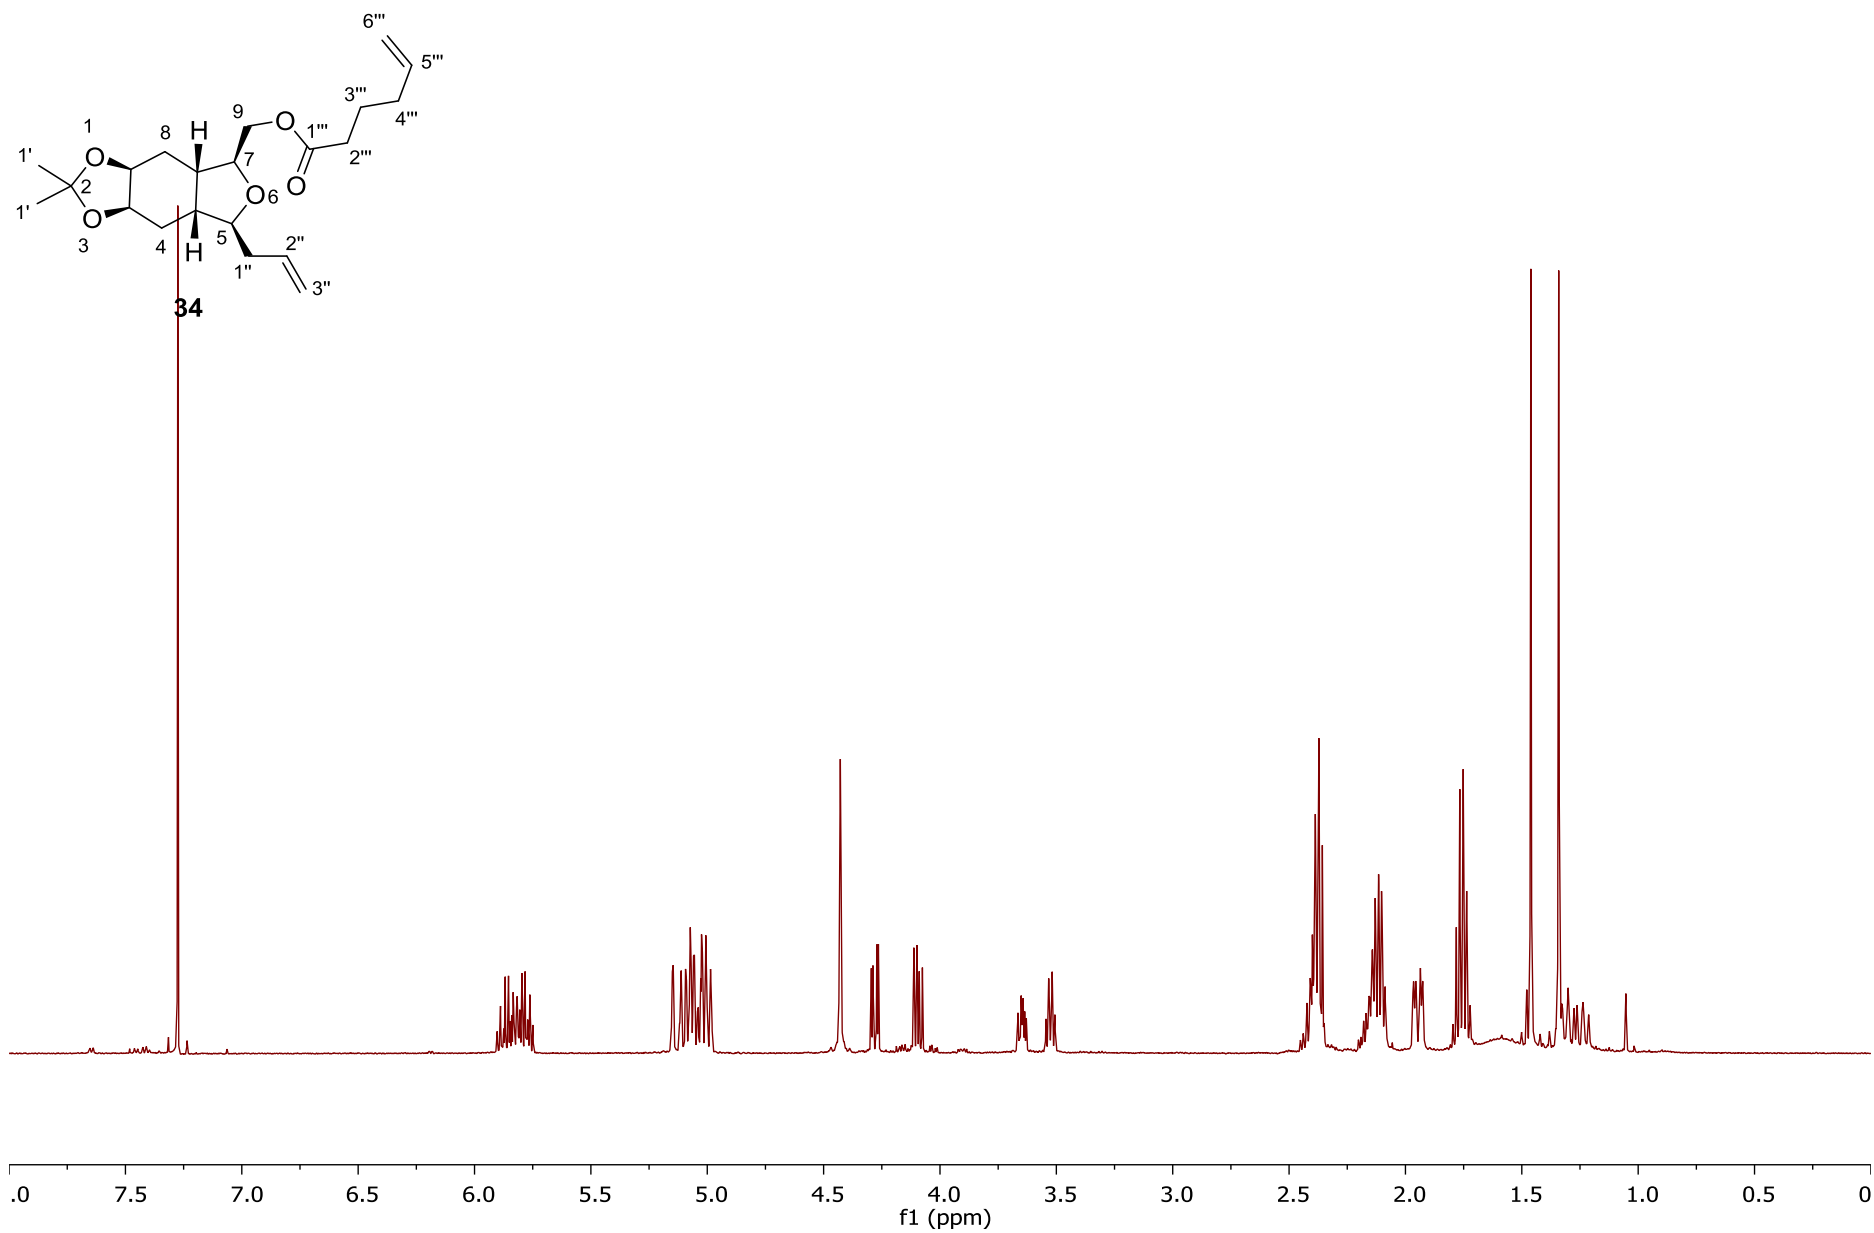

((3aS,4aS,5S,7S,7aR,8aR)-7-allyl-2,2-dimethyloctahydroisobenzofuro[5,6-d][1,3]dioxol-5-yl)methyl hex-5-enoate **34**

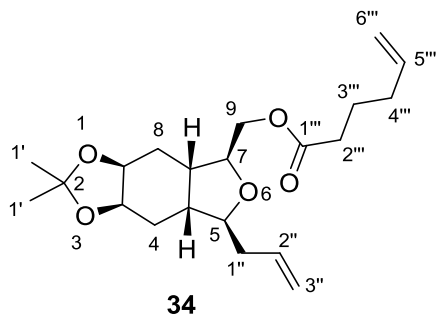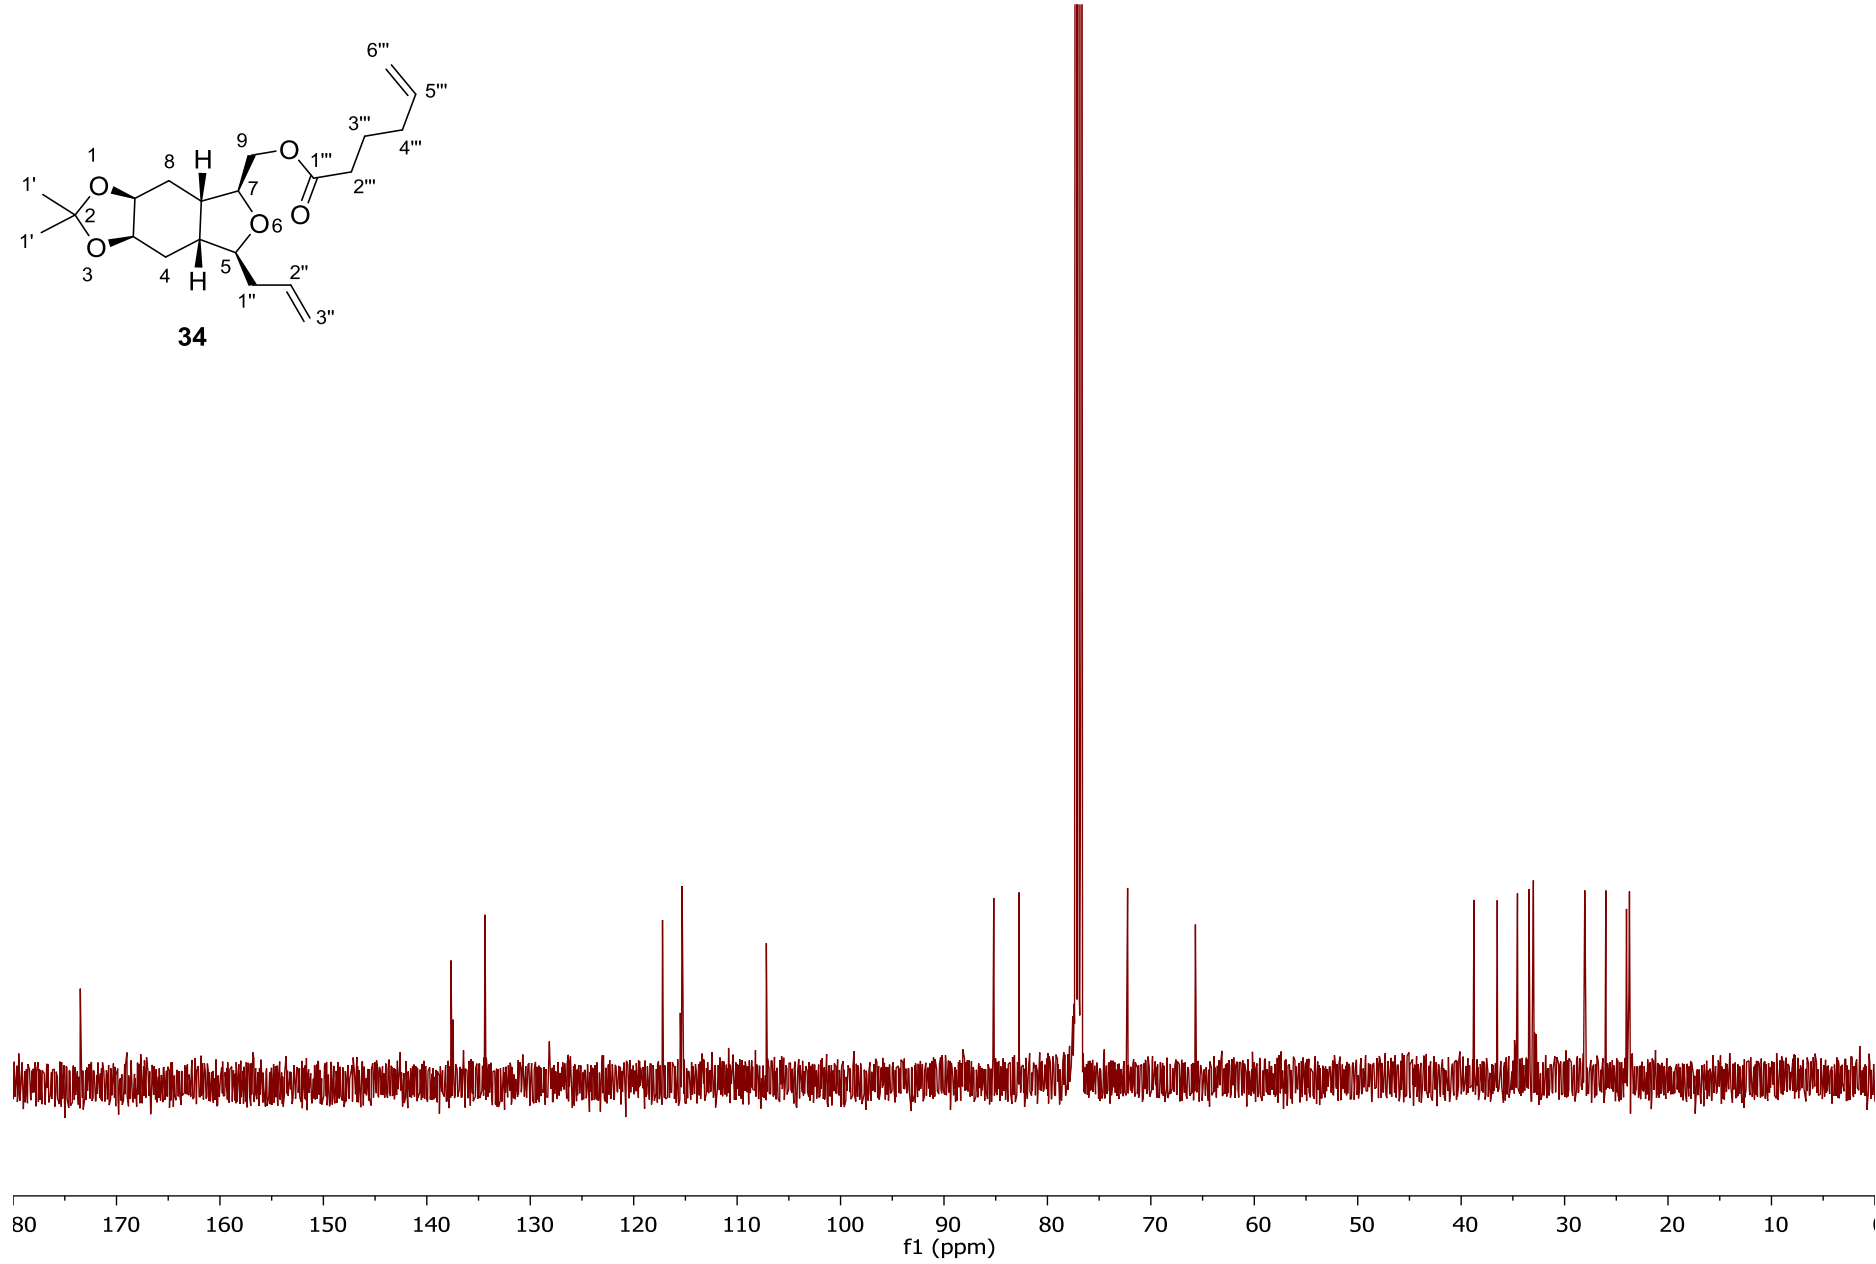

(1S,2R,4R,8S,10S,11S,18E)-6,6-dimethyl-5,7,13,21-tetraoxatetracyclo[9.9.1.0<sup>2,10</sup>.0<sup>4,8</sup>]henicos-18-en-14-one **35**

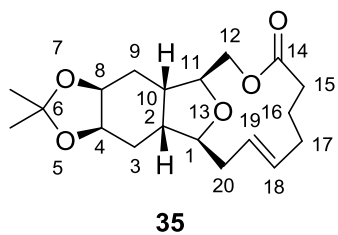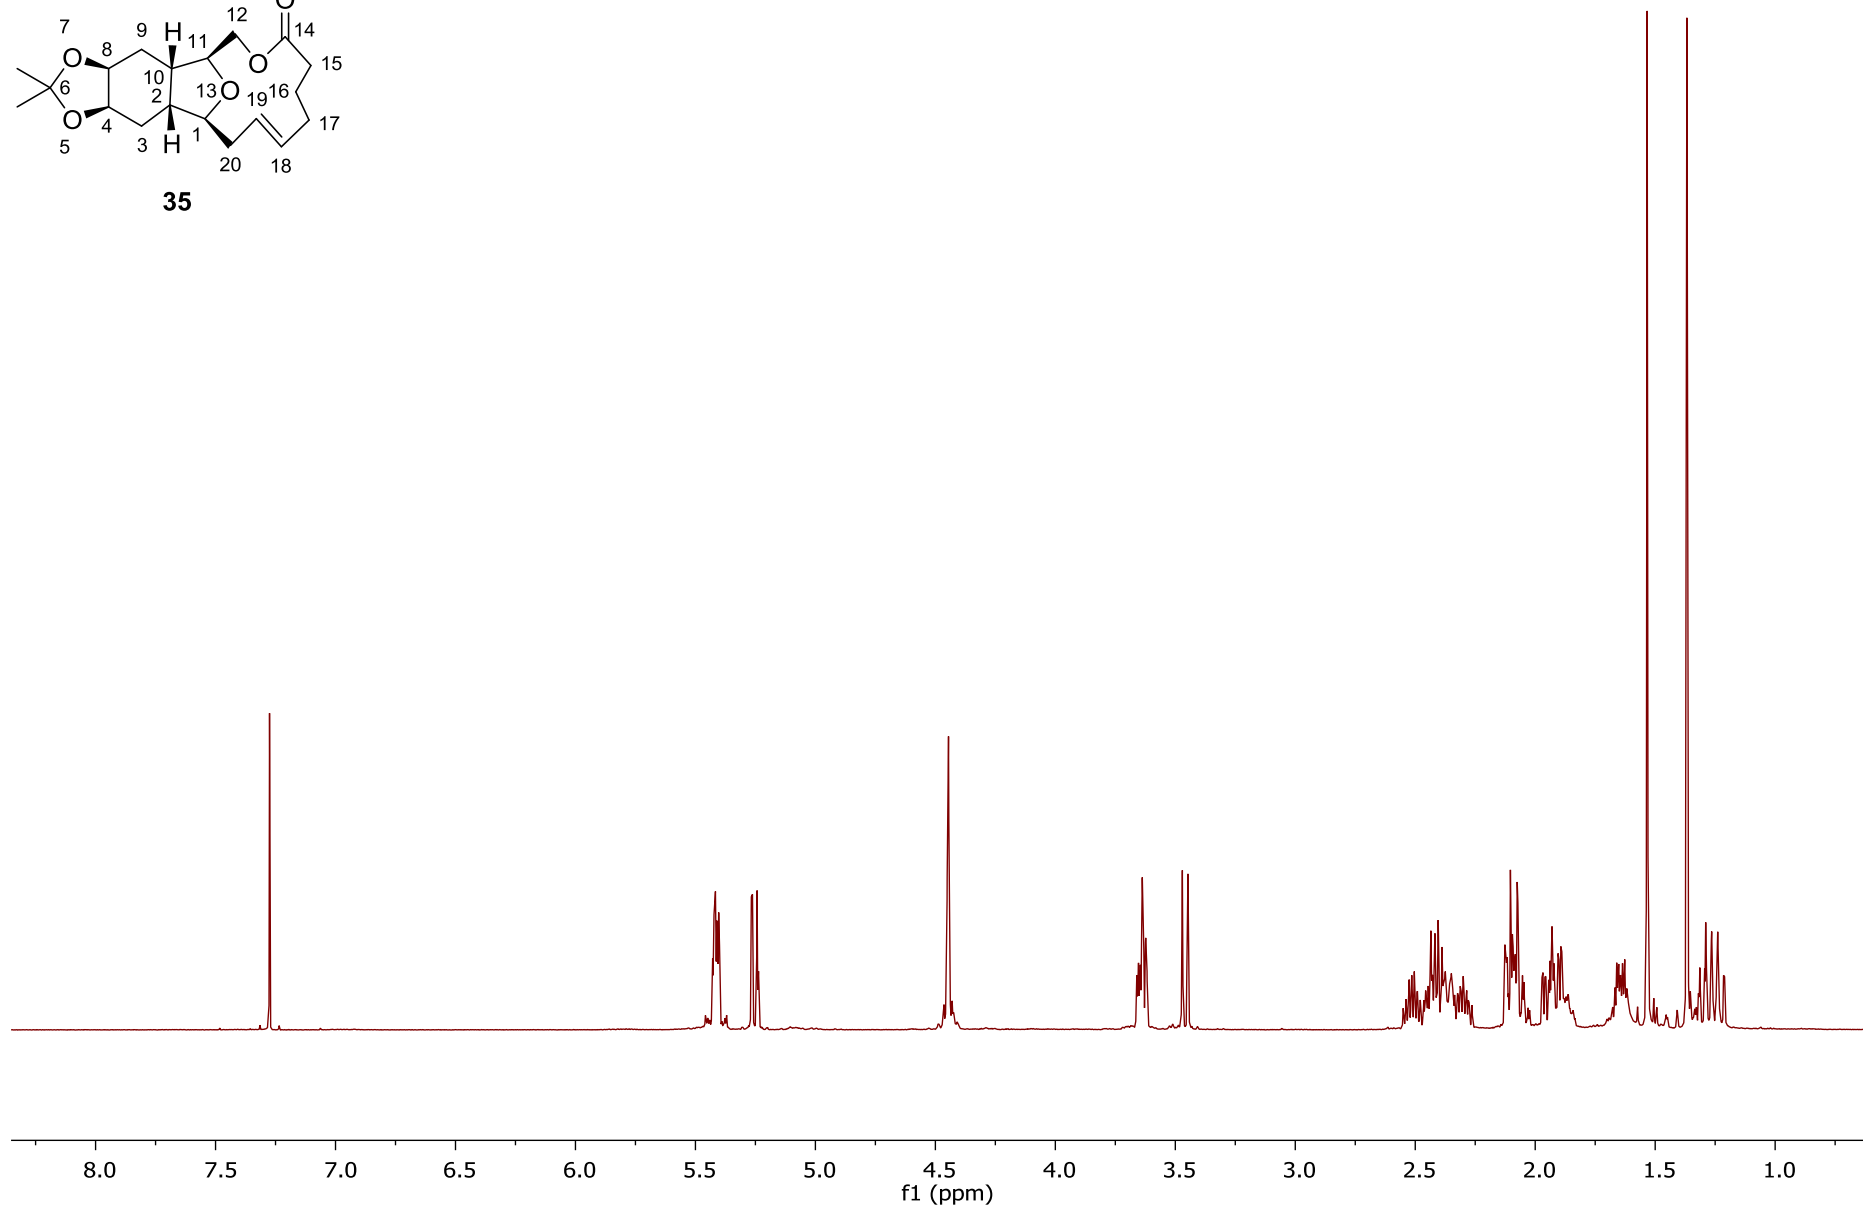

(1S,2R,4R,8S,10S,11S,18E)-6,6-dimethyl-5,7,13,21-tetraoxatetracyclo[9.9.1.0<sup>2,10</sup>.0<sup>4,8</sup>]henicos-18-en-14-one **35**

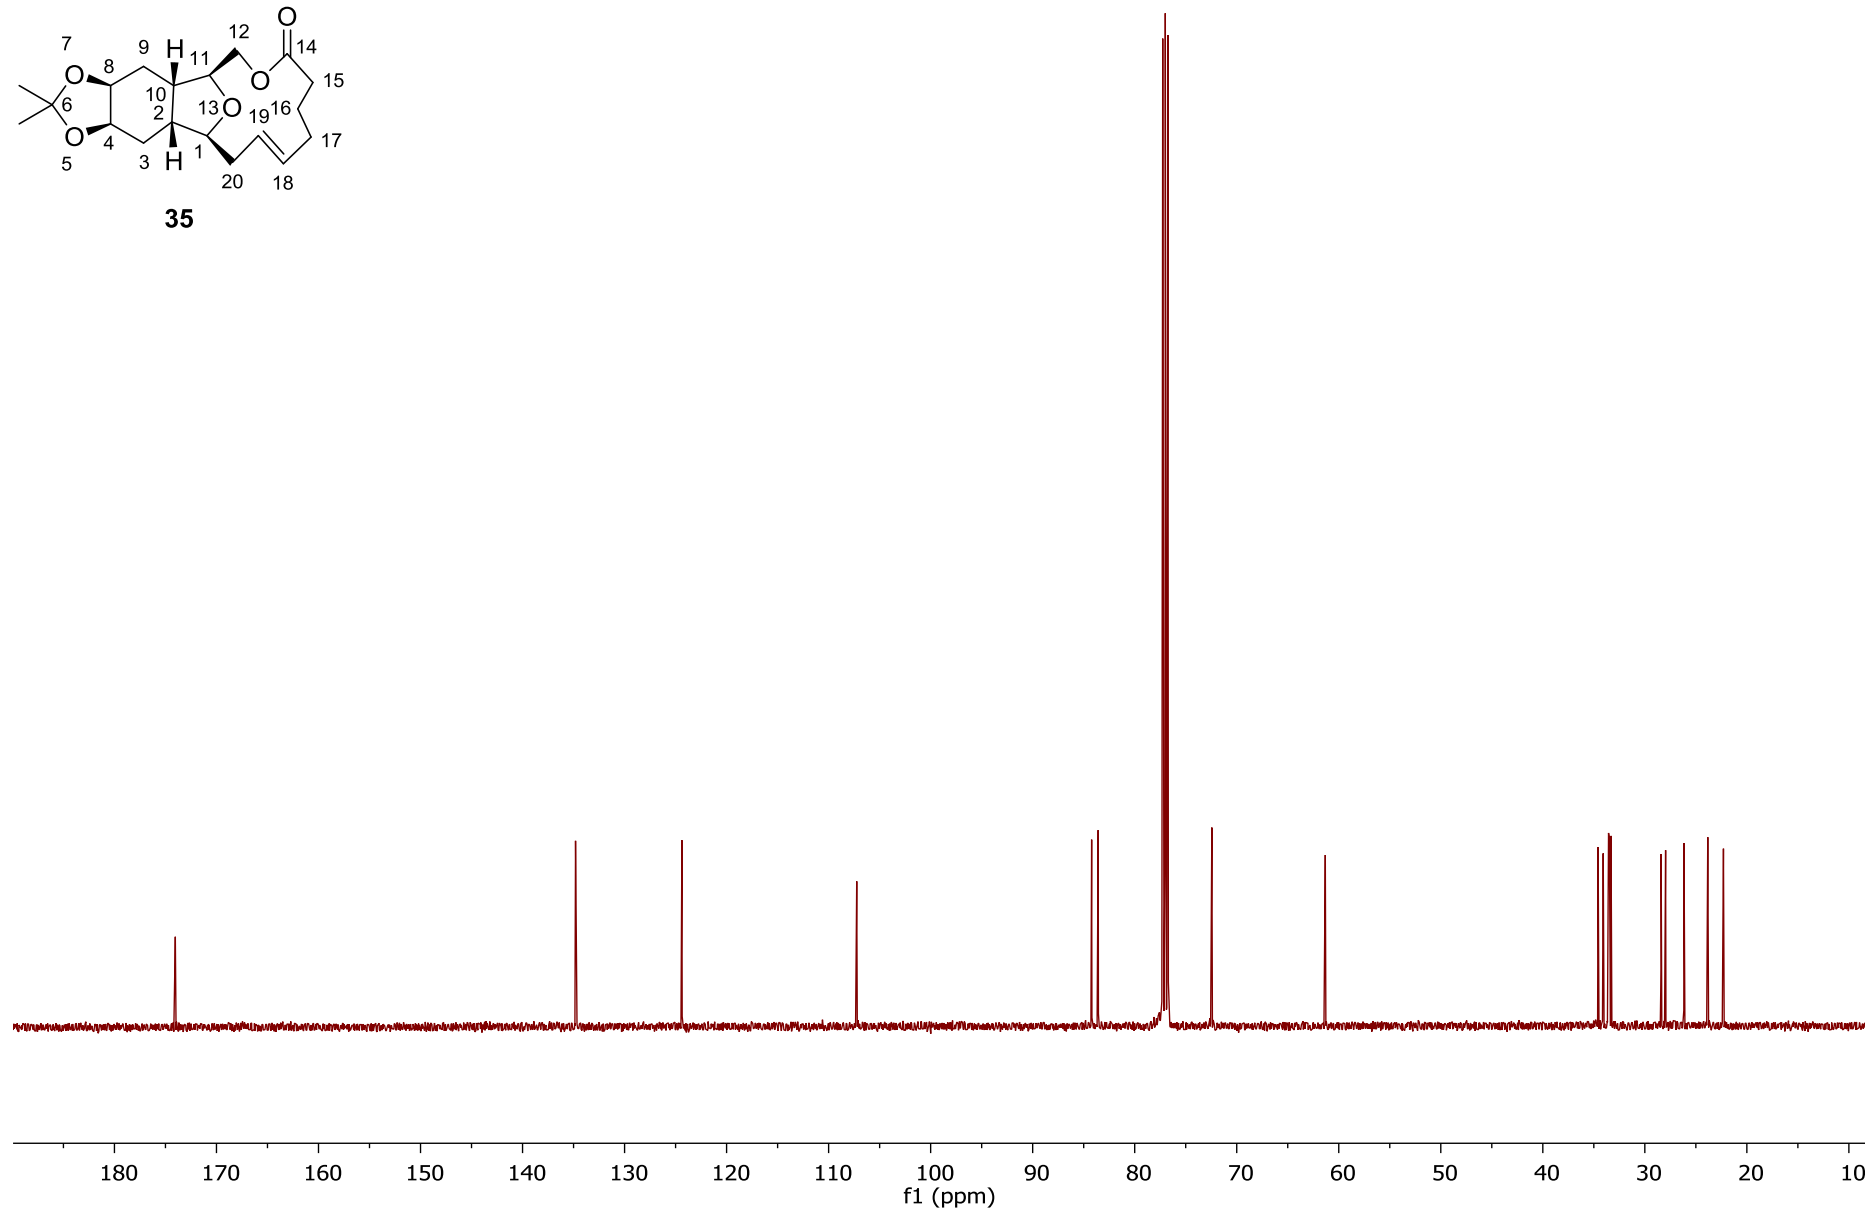

(E)-(1S,11S,12R,14R,15S,17S)-14,15-Dihydroxy-3,18-dioxa-tricyclo[9.6.1.0<sup>12,17</sup>]octadec-8-en-4-one **36**

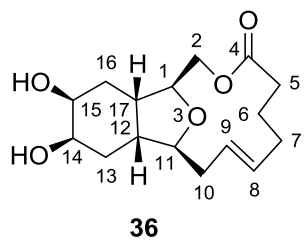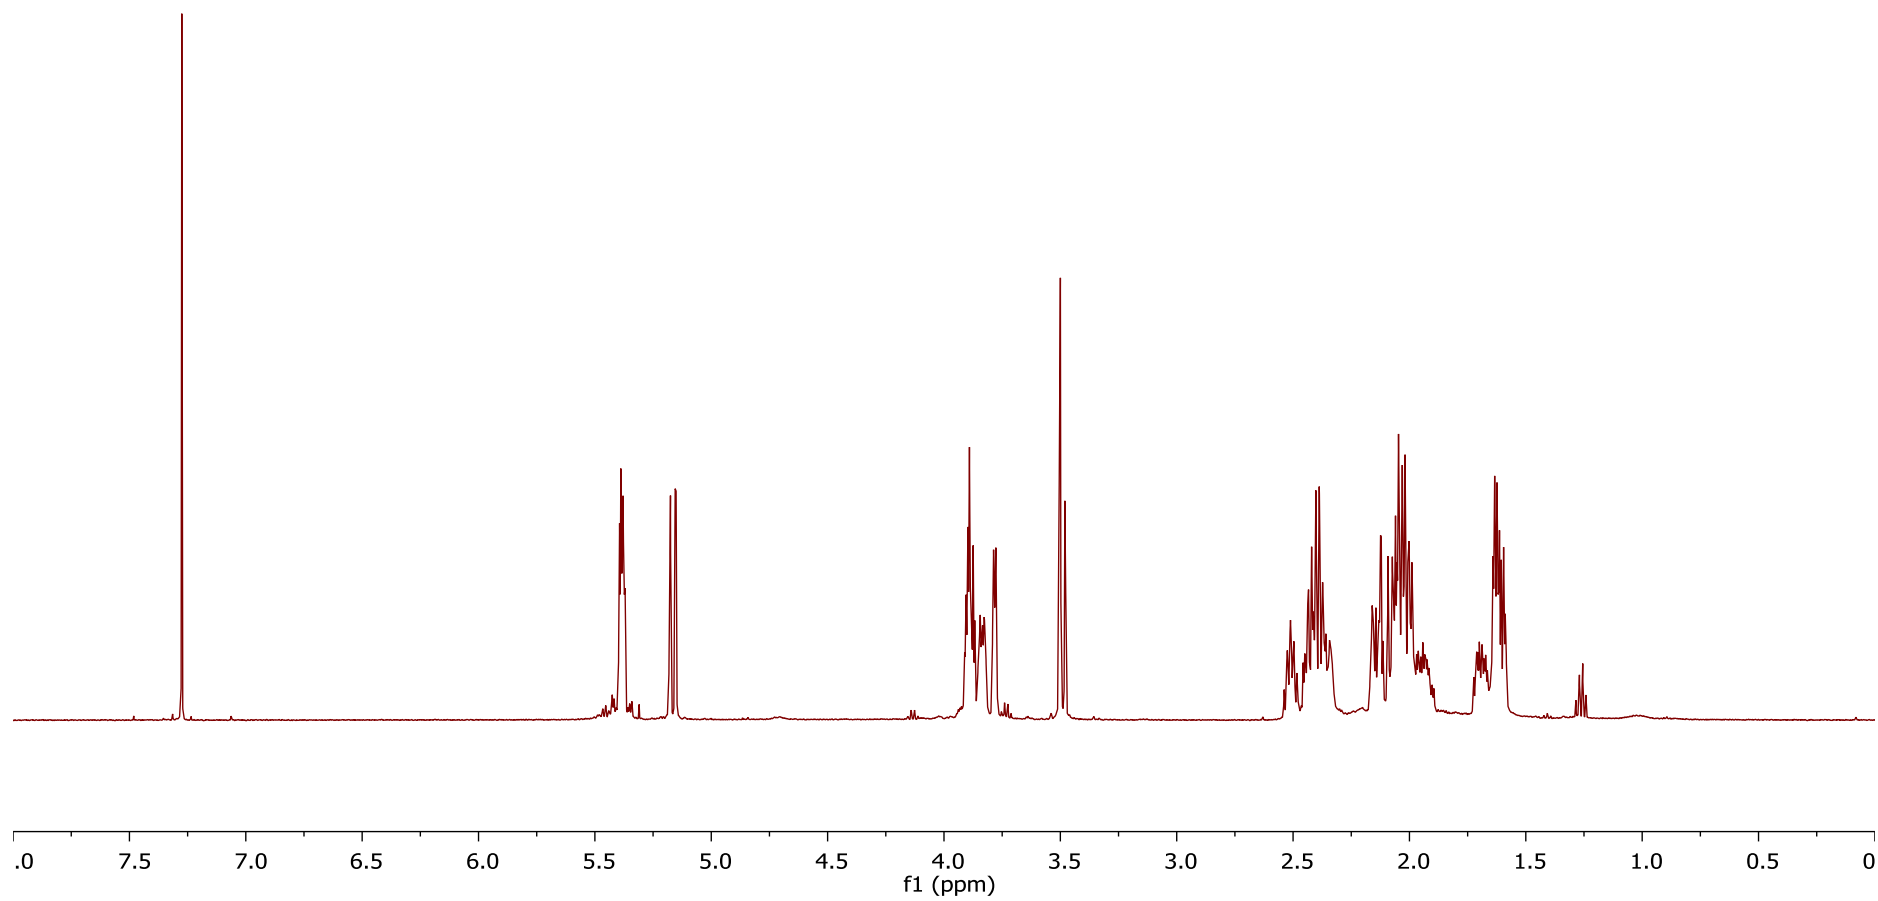

(E)-(1S,11S,12R,14R,15S,17S)-14,15-Dihydroxy-3,18-dioxa-tricyclo[9.6.1.0<sup>12,17</sup>]octadec-8-en-4-one **36**

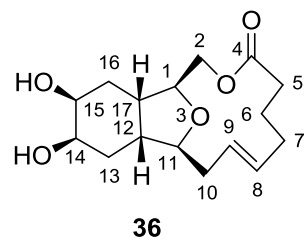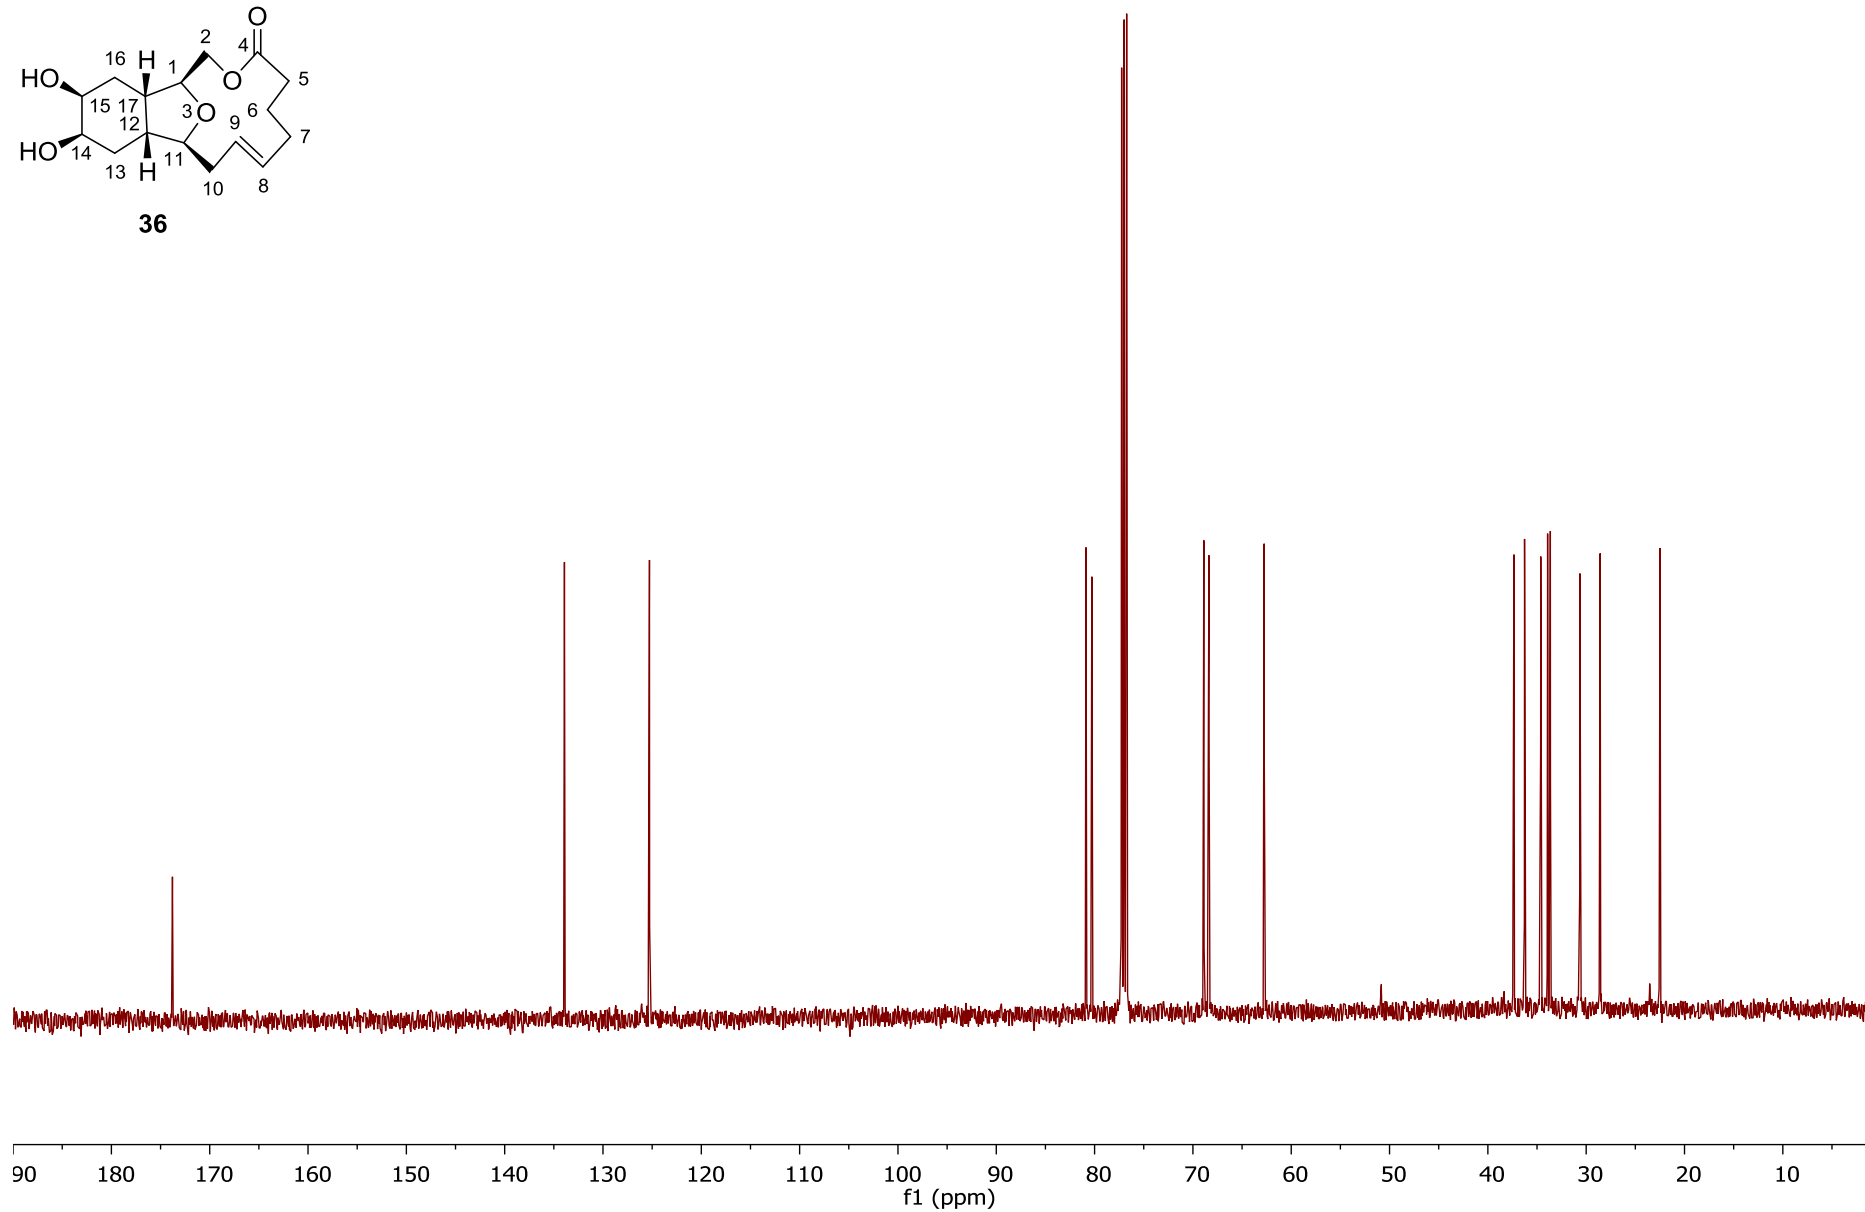

(3*S*,3*aS*,7*aR*)-3-(((*tert*-butyldiphenylsilyl)oxy)methyl)-5-methyl-3*a*,4,7,7*a*-tetrahydroisobenzofuran-1(3*H*)-one **37**

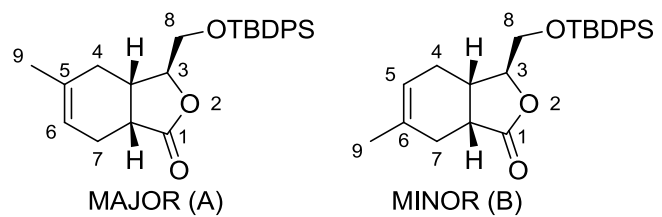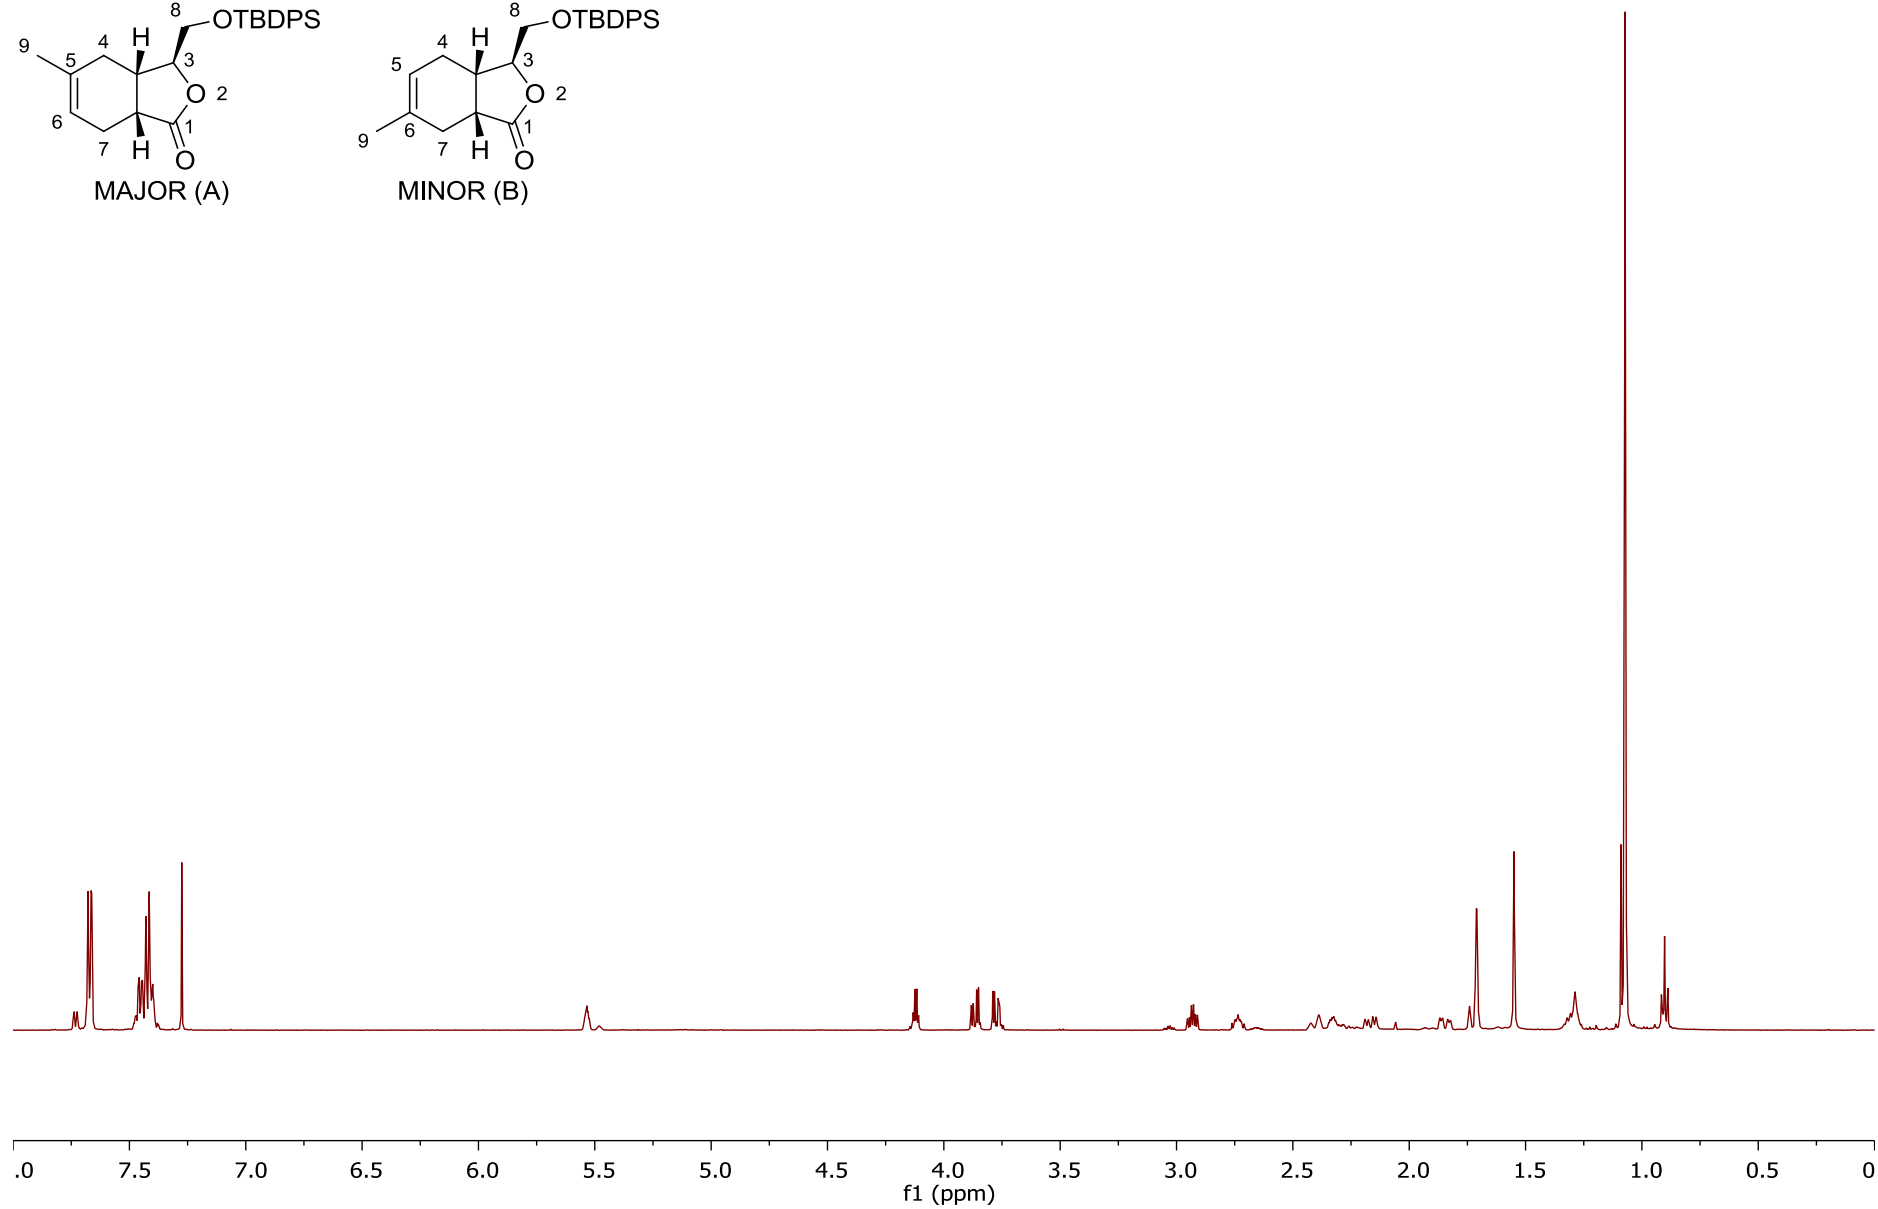

(3*S*,3*aS*,7*aR*)-3-(((tert-butyl)phenylsilyl)oxy)methyl)-5-methyl-3*a*,4,7,7*a*-tetrahydroisobenzofuran-1(3*H*)-one **37**

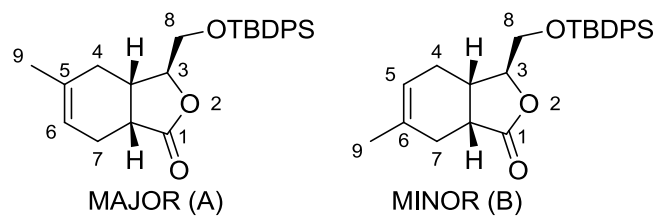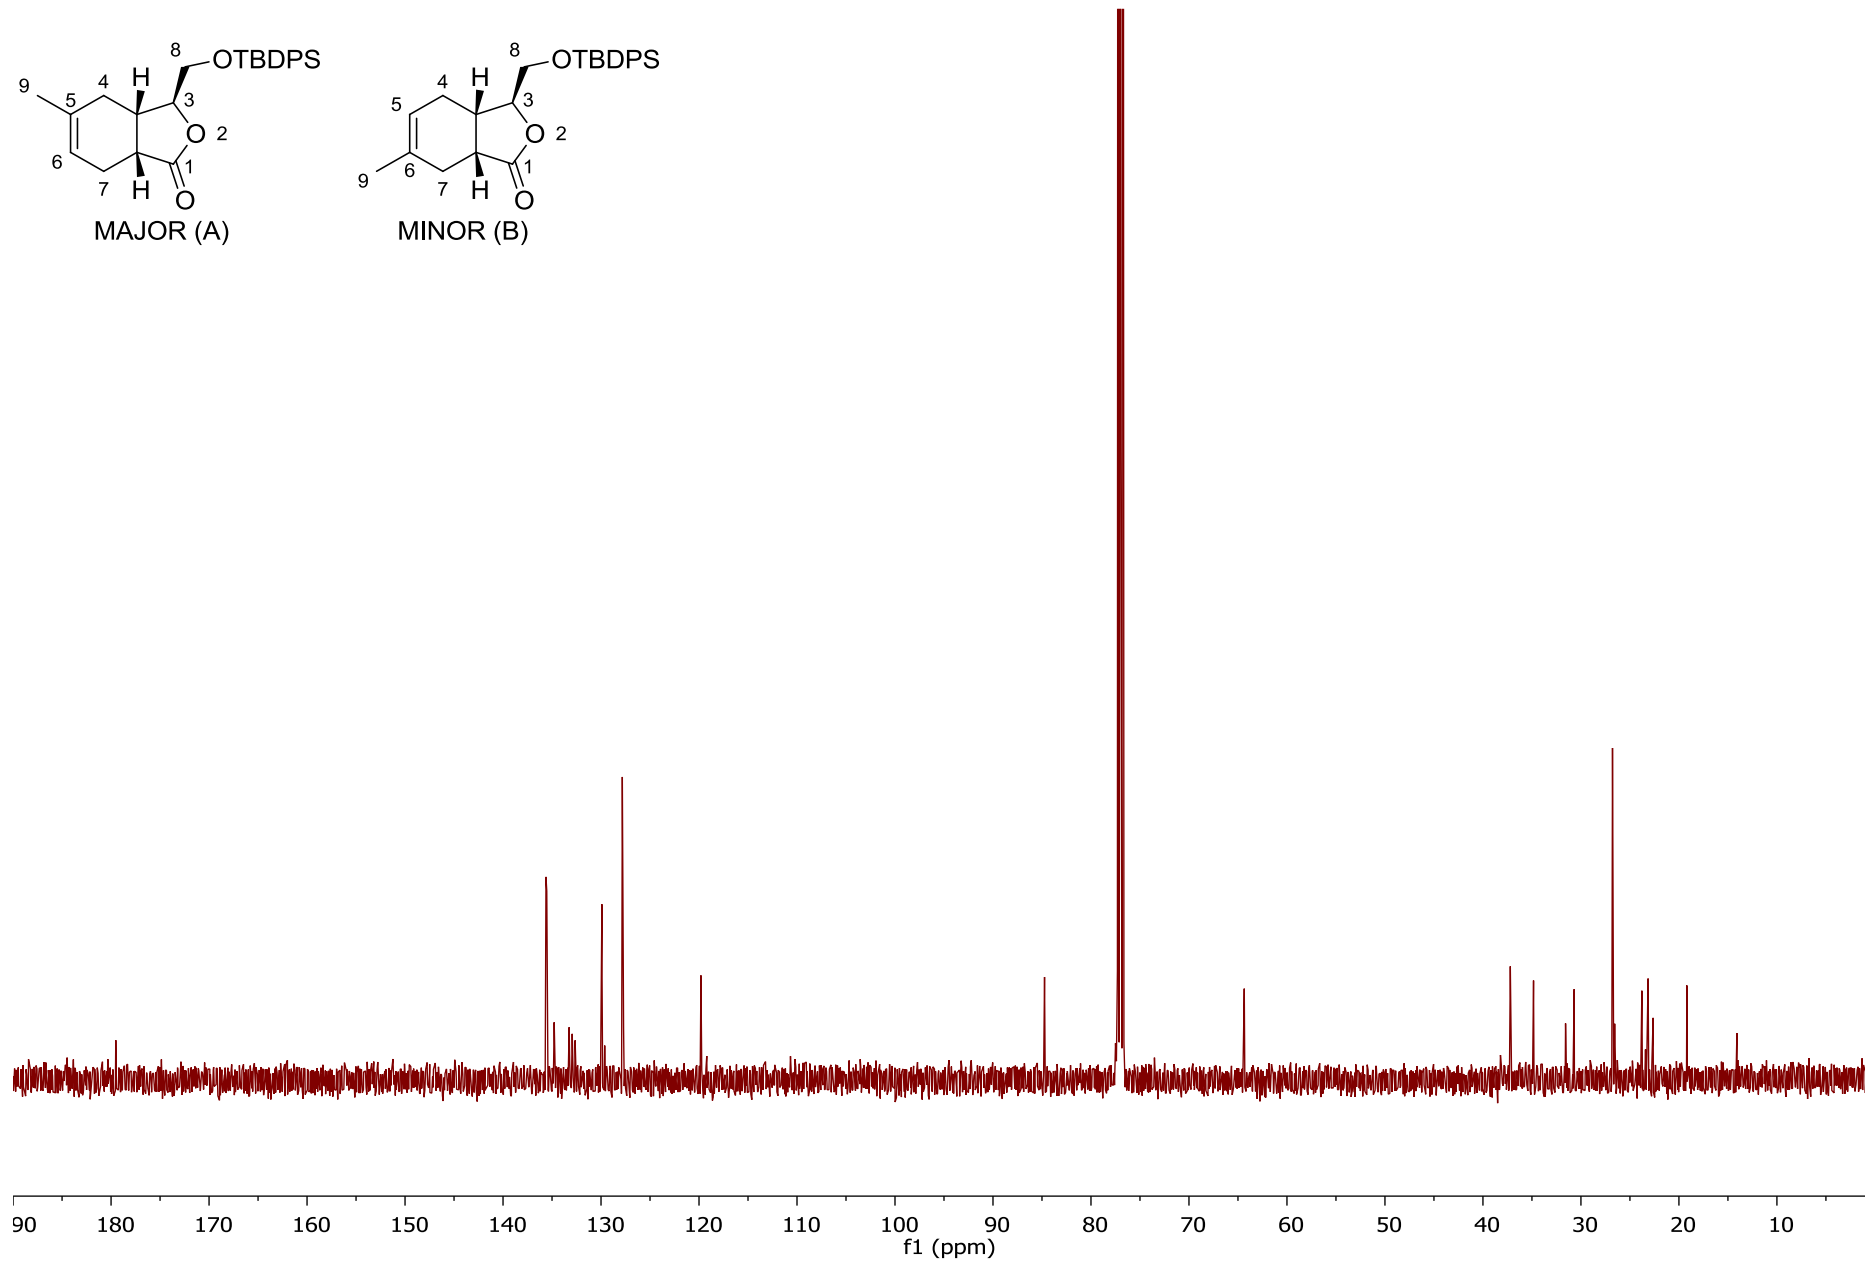



(3S, 3aS, 5R, 6R, 7aR)-3-(*tert*-Butyldiphenylsilanyloxymethyl)-6-hydroxy-5-methylhexahydroisobenzofuran-1-one **38**

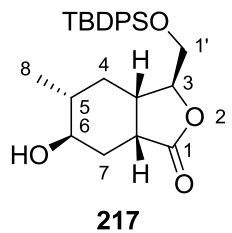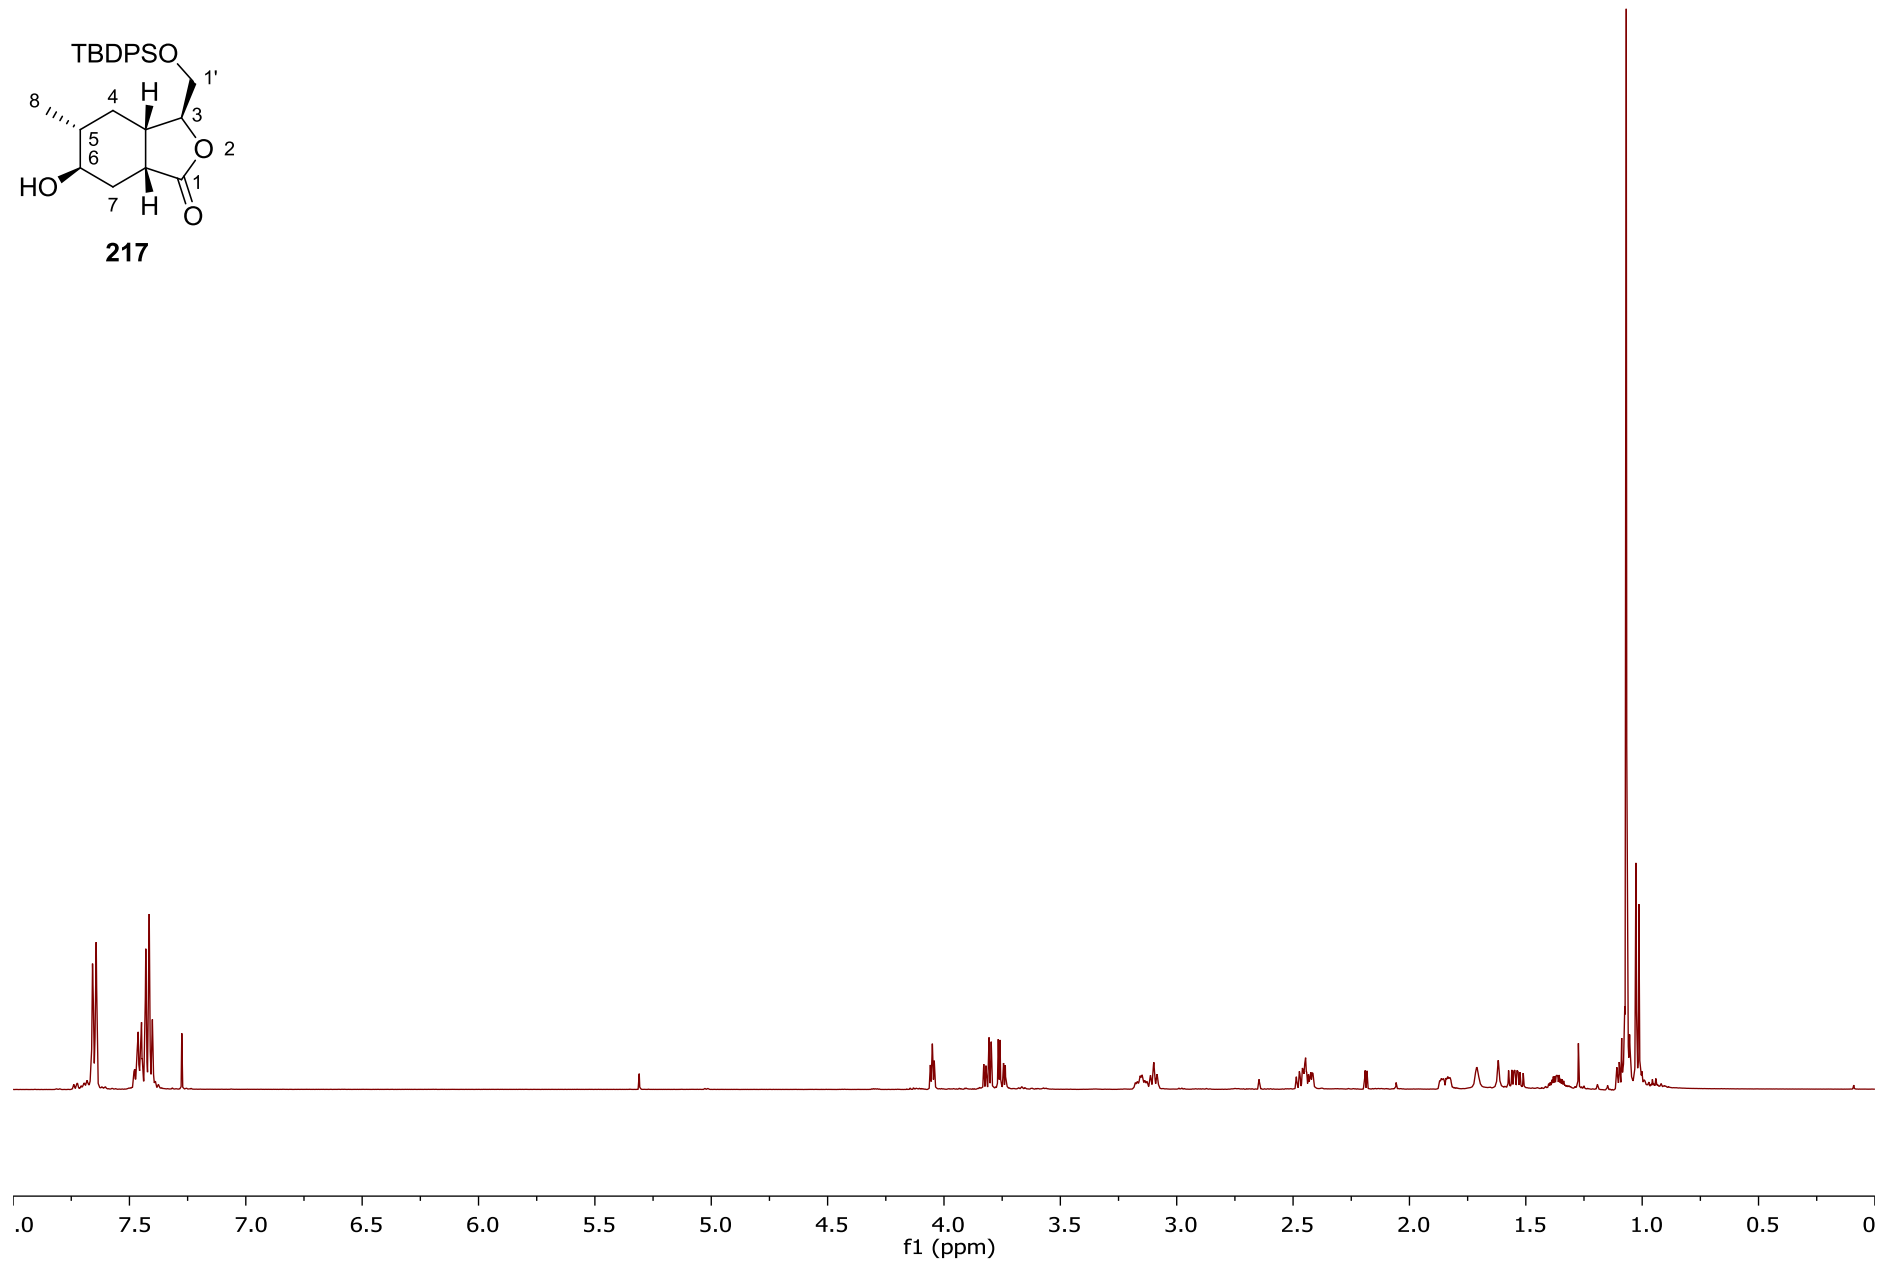

(3S, 3aS, 5R, 6R, 7aR)-3-(*tert*-Butyldiphenylsilanyloxymethyl)-6-hydroxy-5-methylhexahydroisobenzofuran-1-one **38**

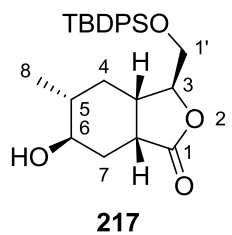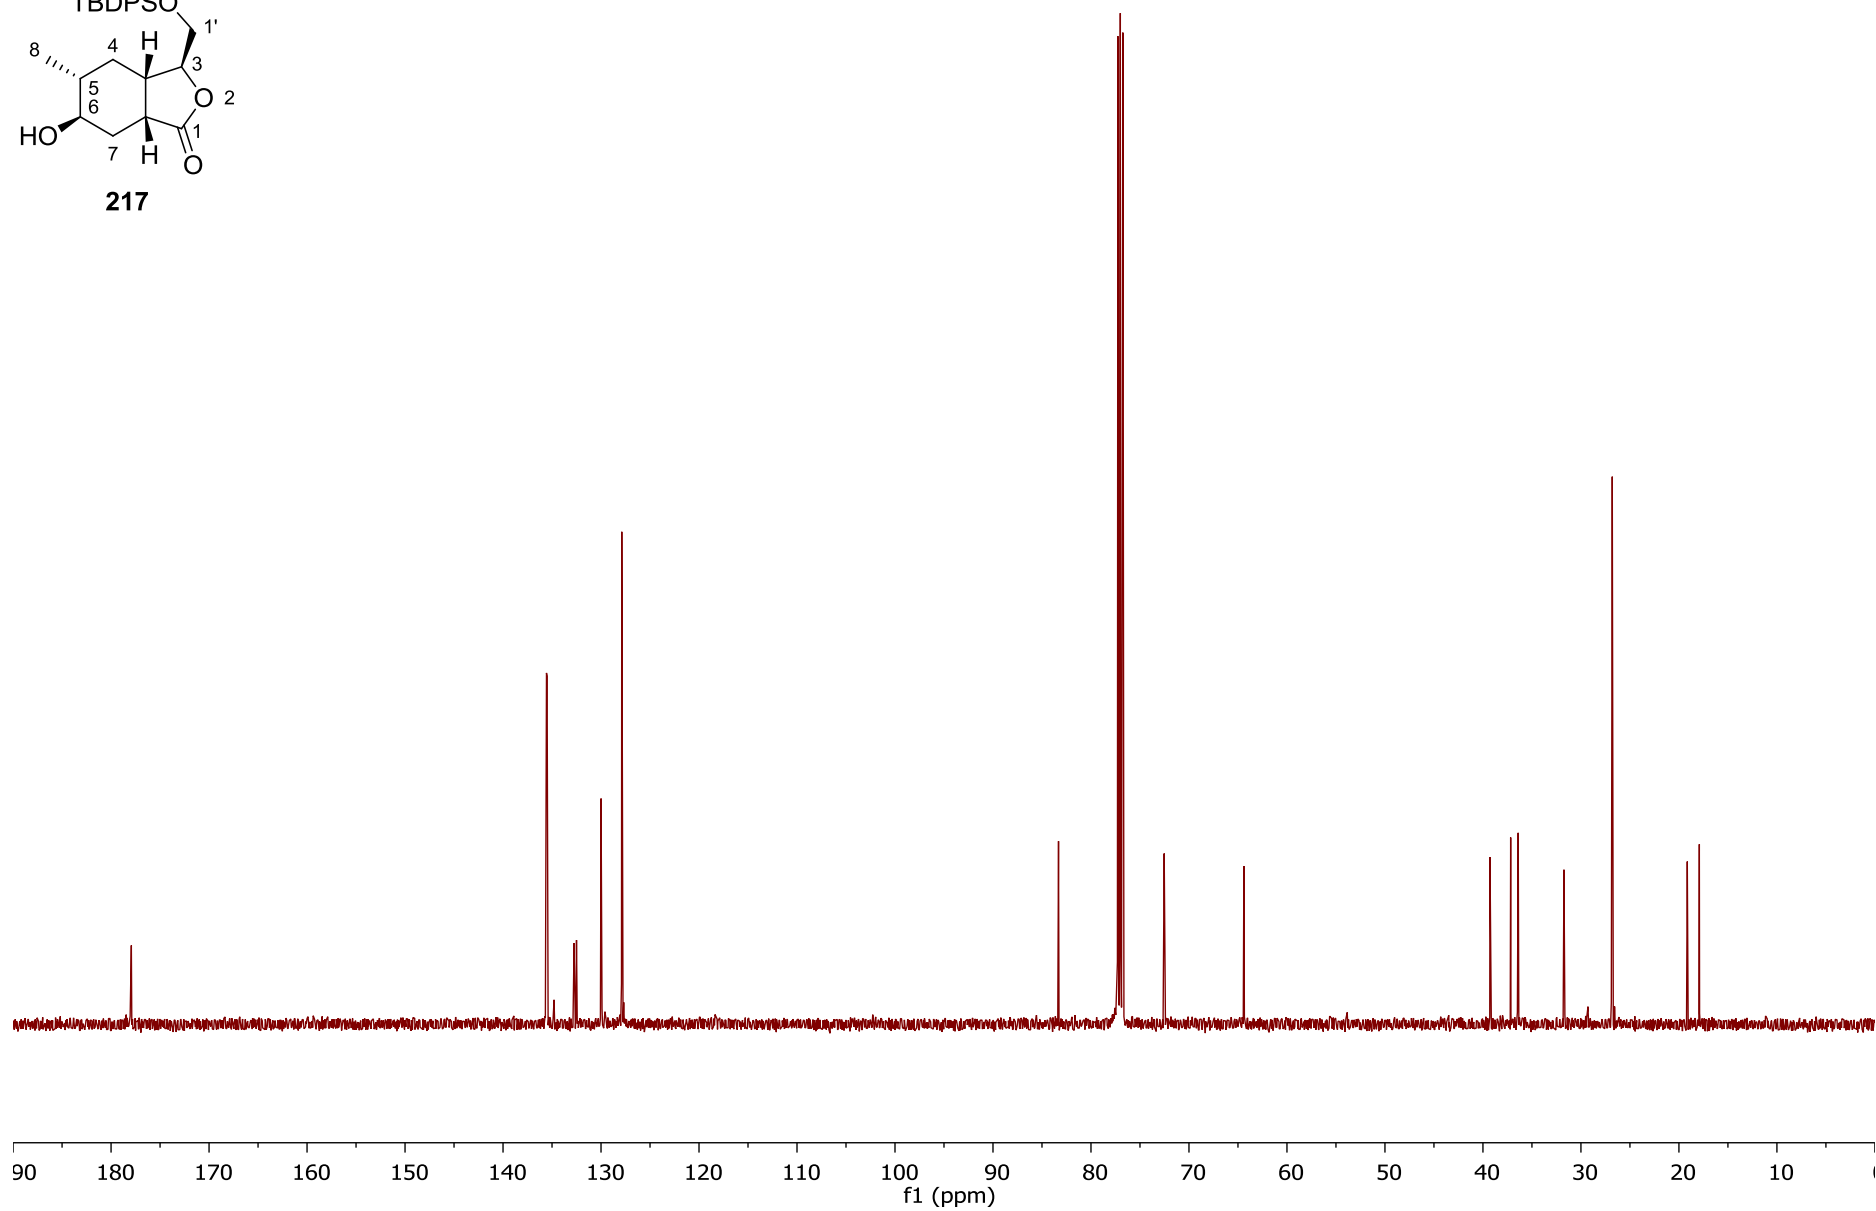

(3*S*,3*aS*,5*R*,6*R*,7*aR*)-3-((*tert*-butyldiphenylsilyloxy)methyl)-5-methyloctahydroisobenzofuran-1,6-diol **39a**

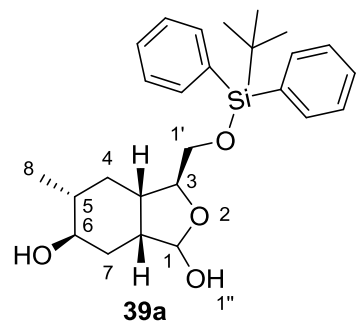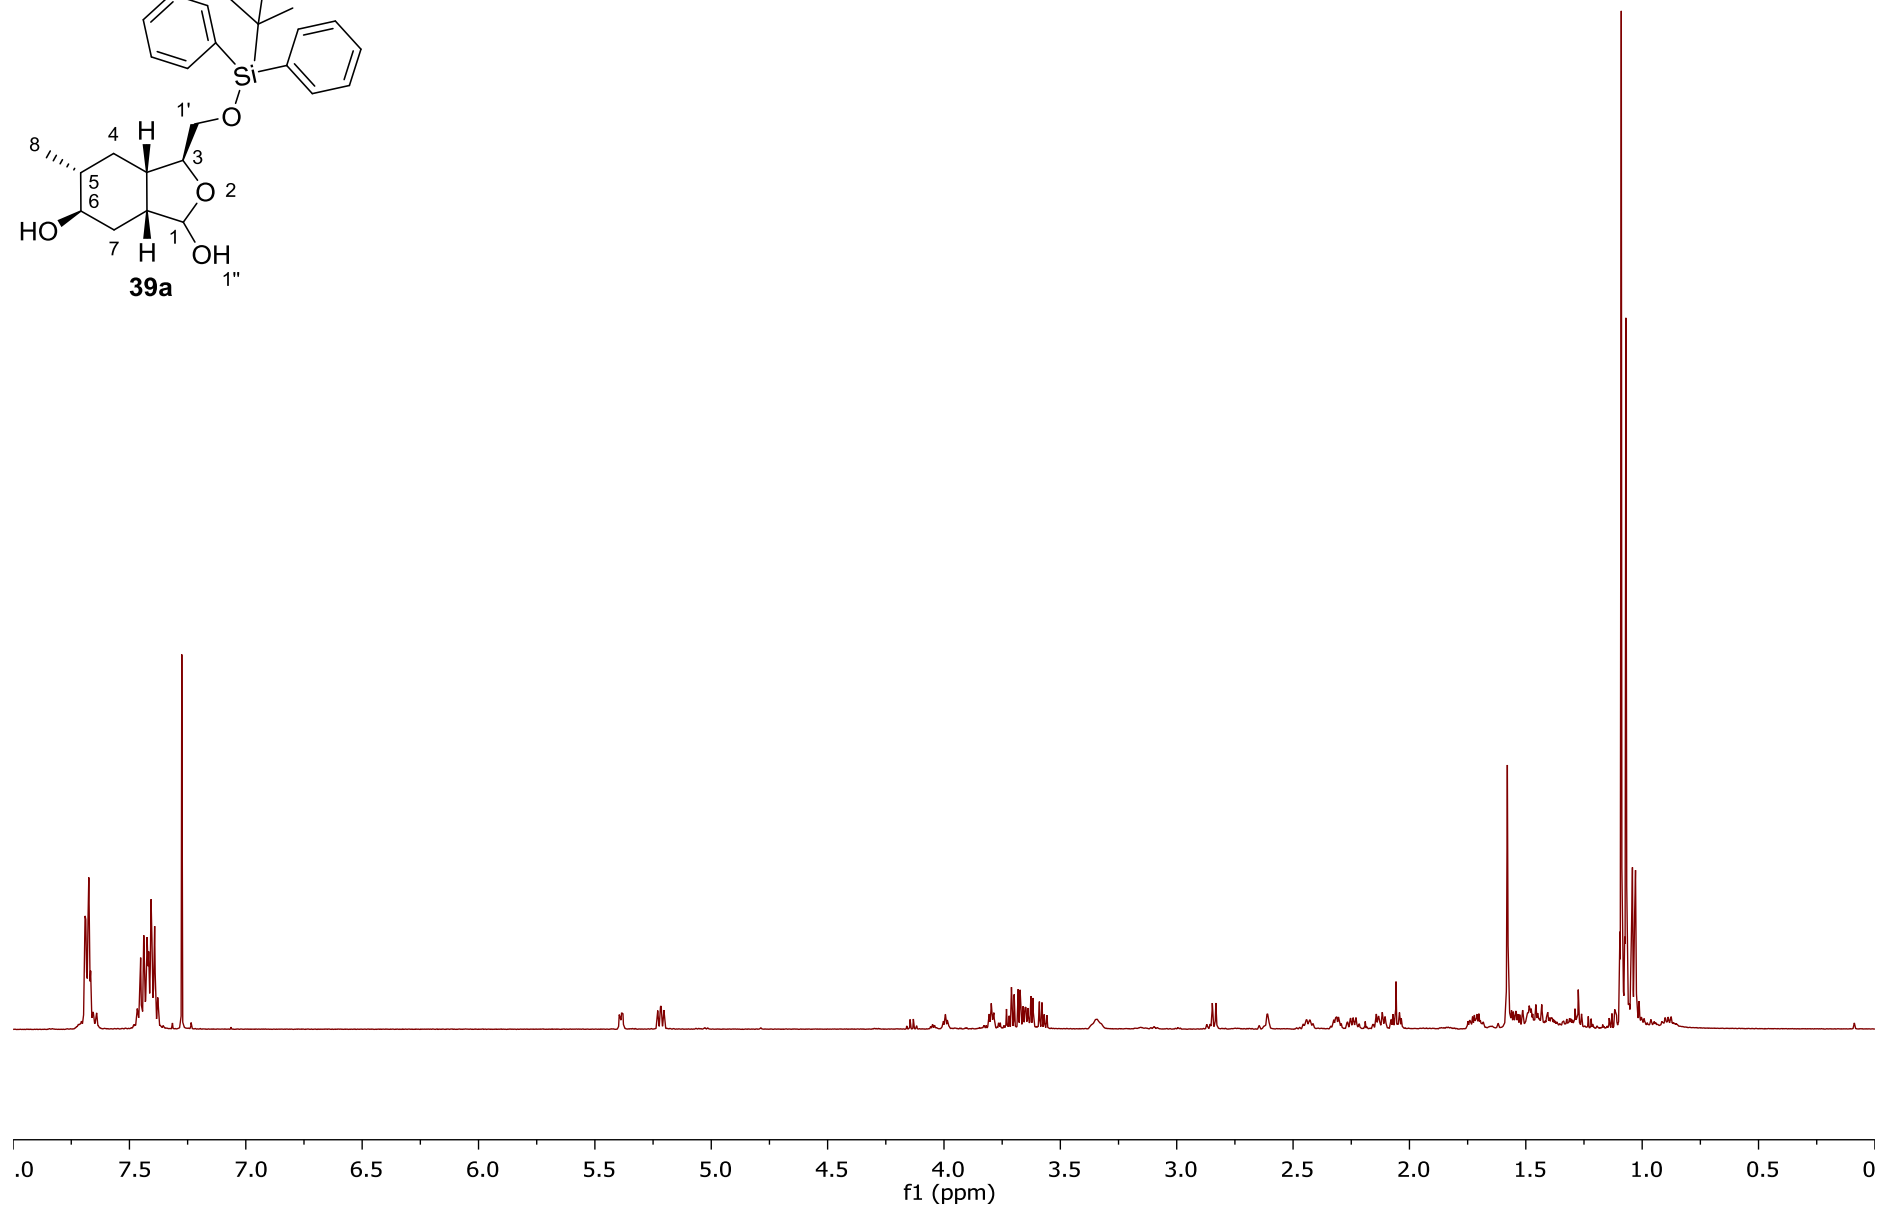

(3*S*,3*aS*,5*R*,6*R*,7*aR*)-3-((*tert*-butyldiphenylsilyloxy)methyl)-5-methyloctahydroisobenzofuran-1,6-diol **39a**

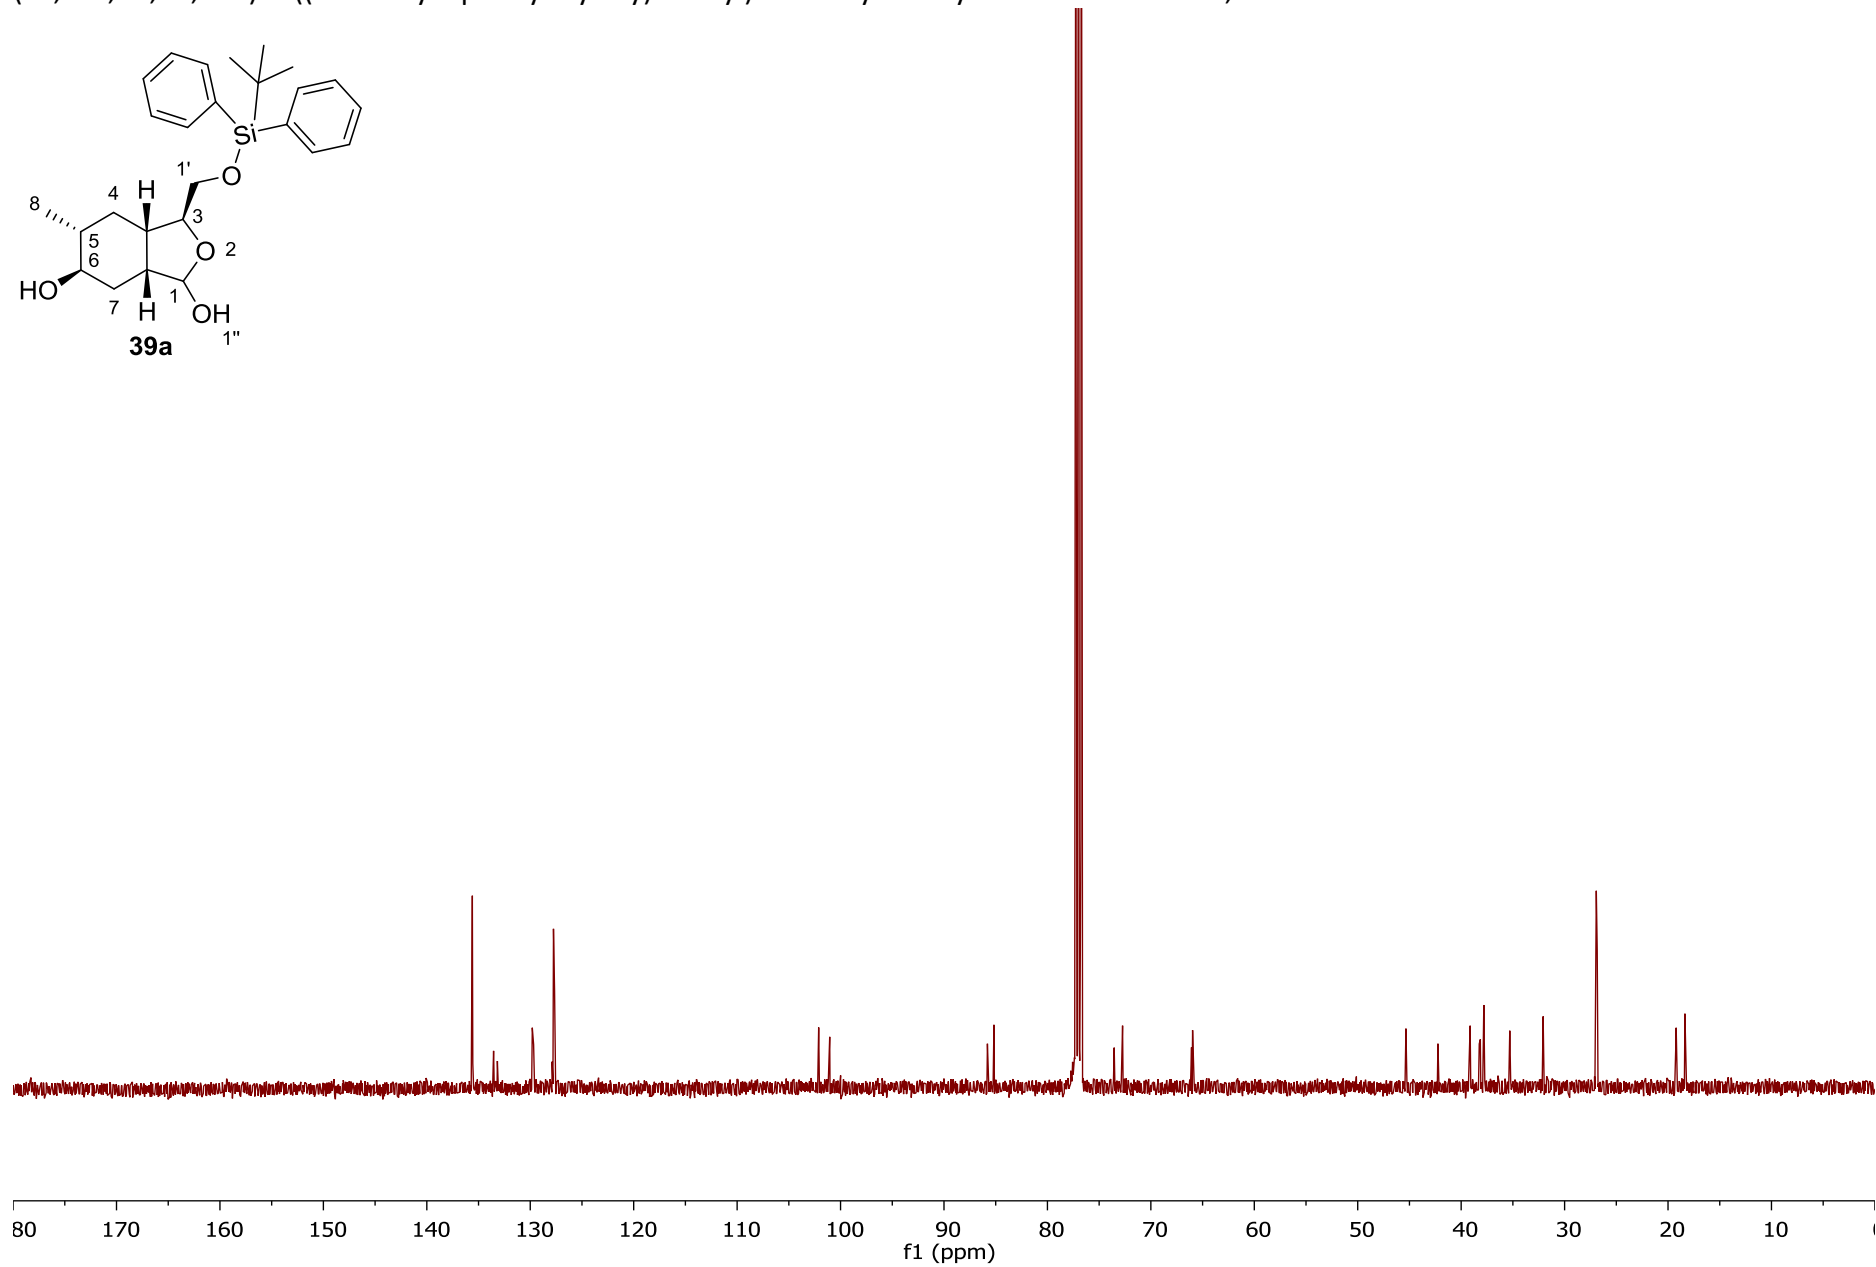

(1*S*,3*S*,3*a**R*,5*R*,6*R*,7*a**S*)-3-allyl-1-((*tert*-butyldiphenylsilyloxy)methyl)-6-methyloctahydroisobenzofuran-5-ol **39b**

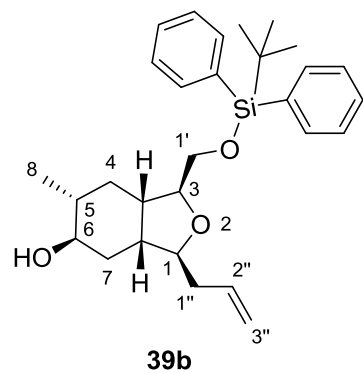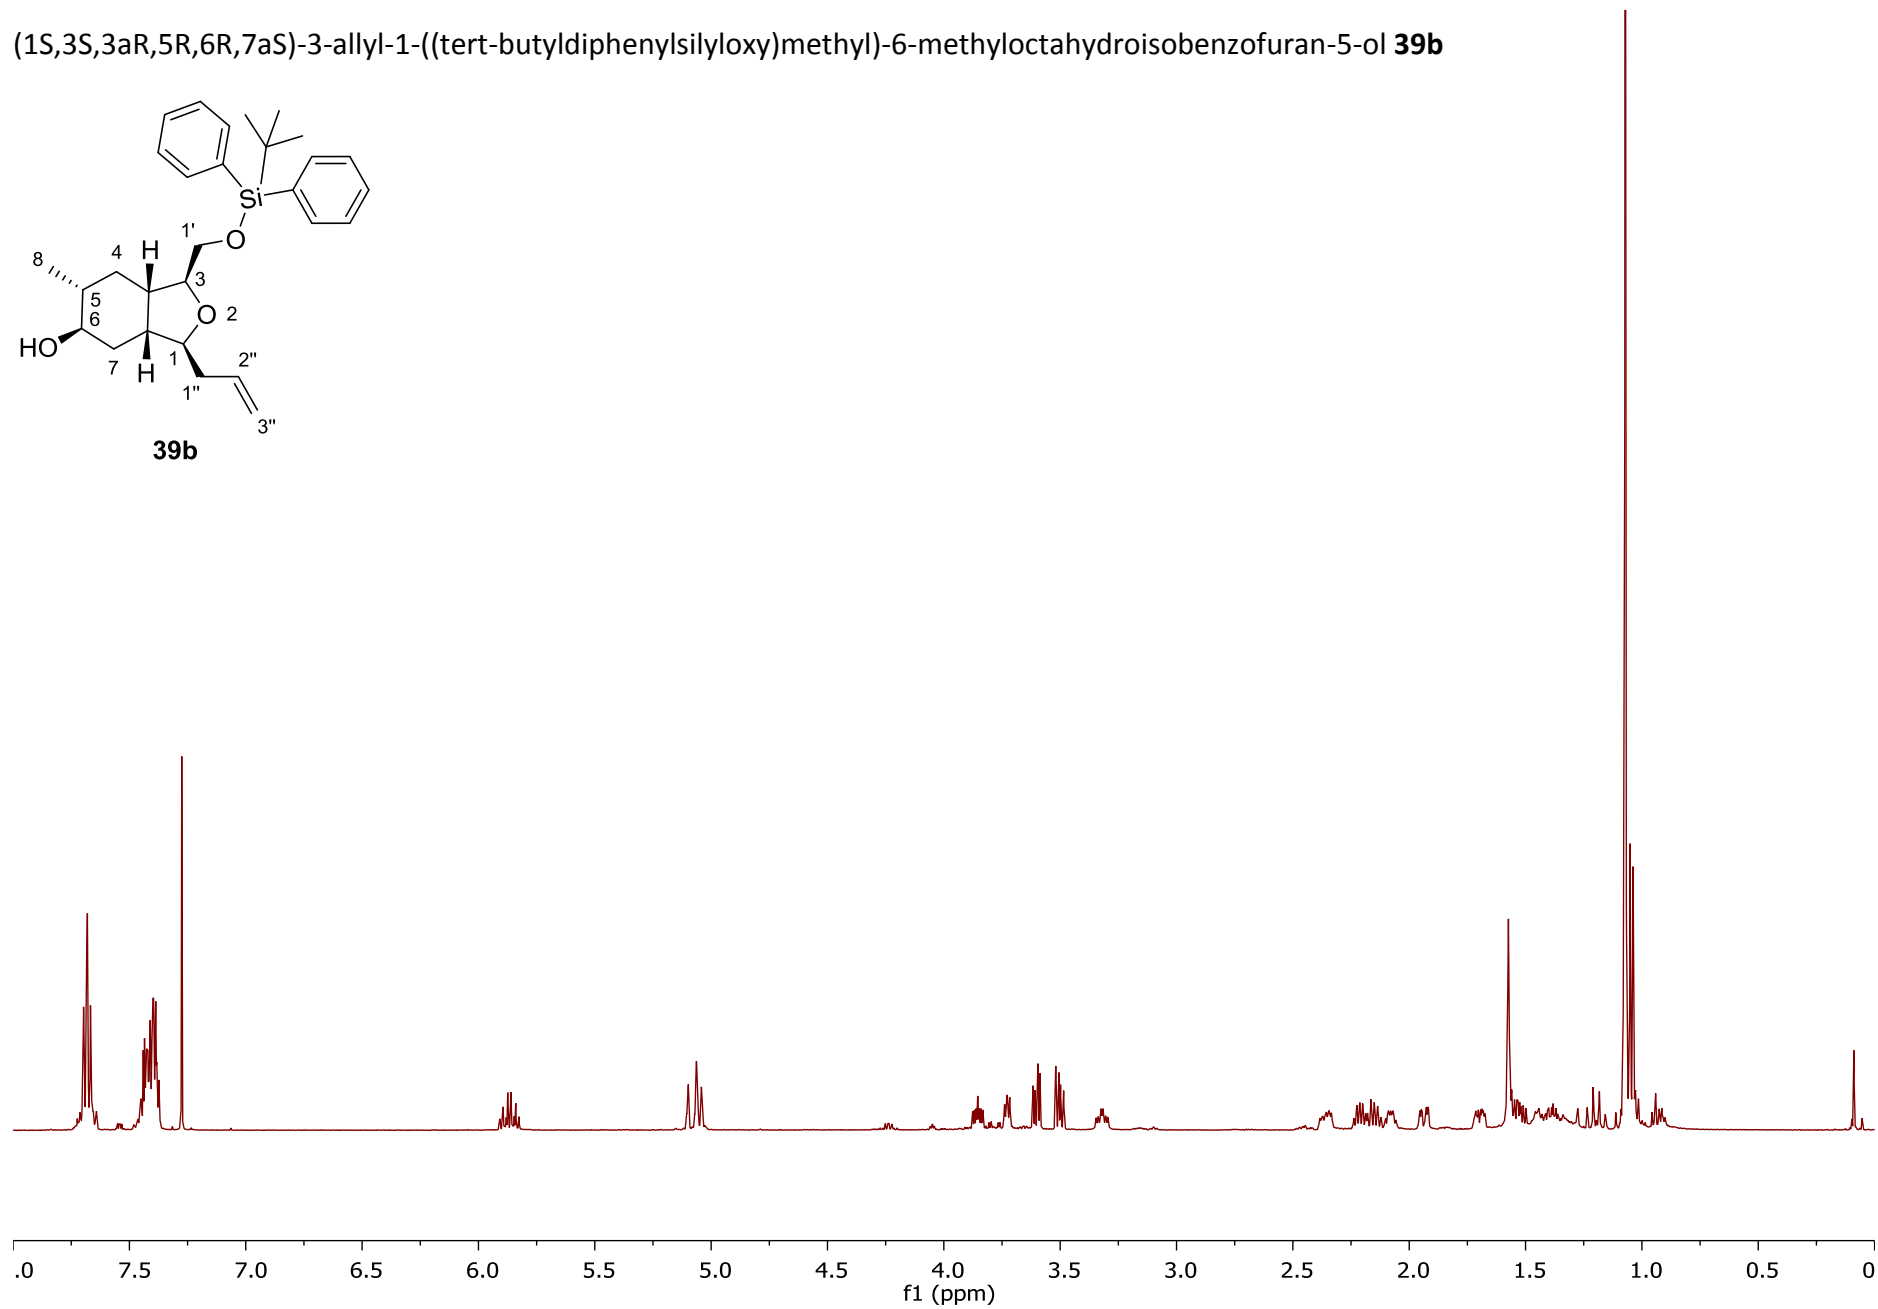

(1S,3S,3aR,5R,6R,7aS)-3-allyl-1-((tert-butylidiphenylsilyloxy)methyl)-6-methyloctahydroisobenzofuran-5-ol **39b**

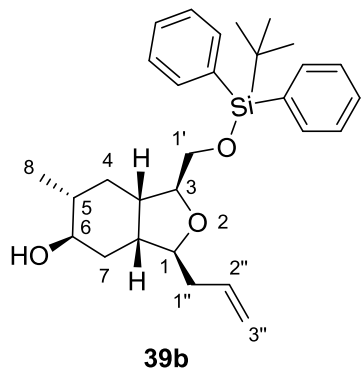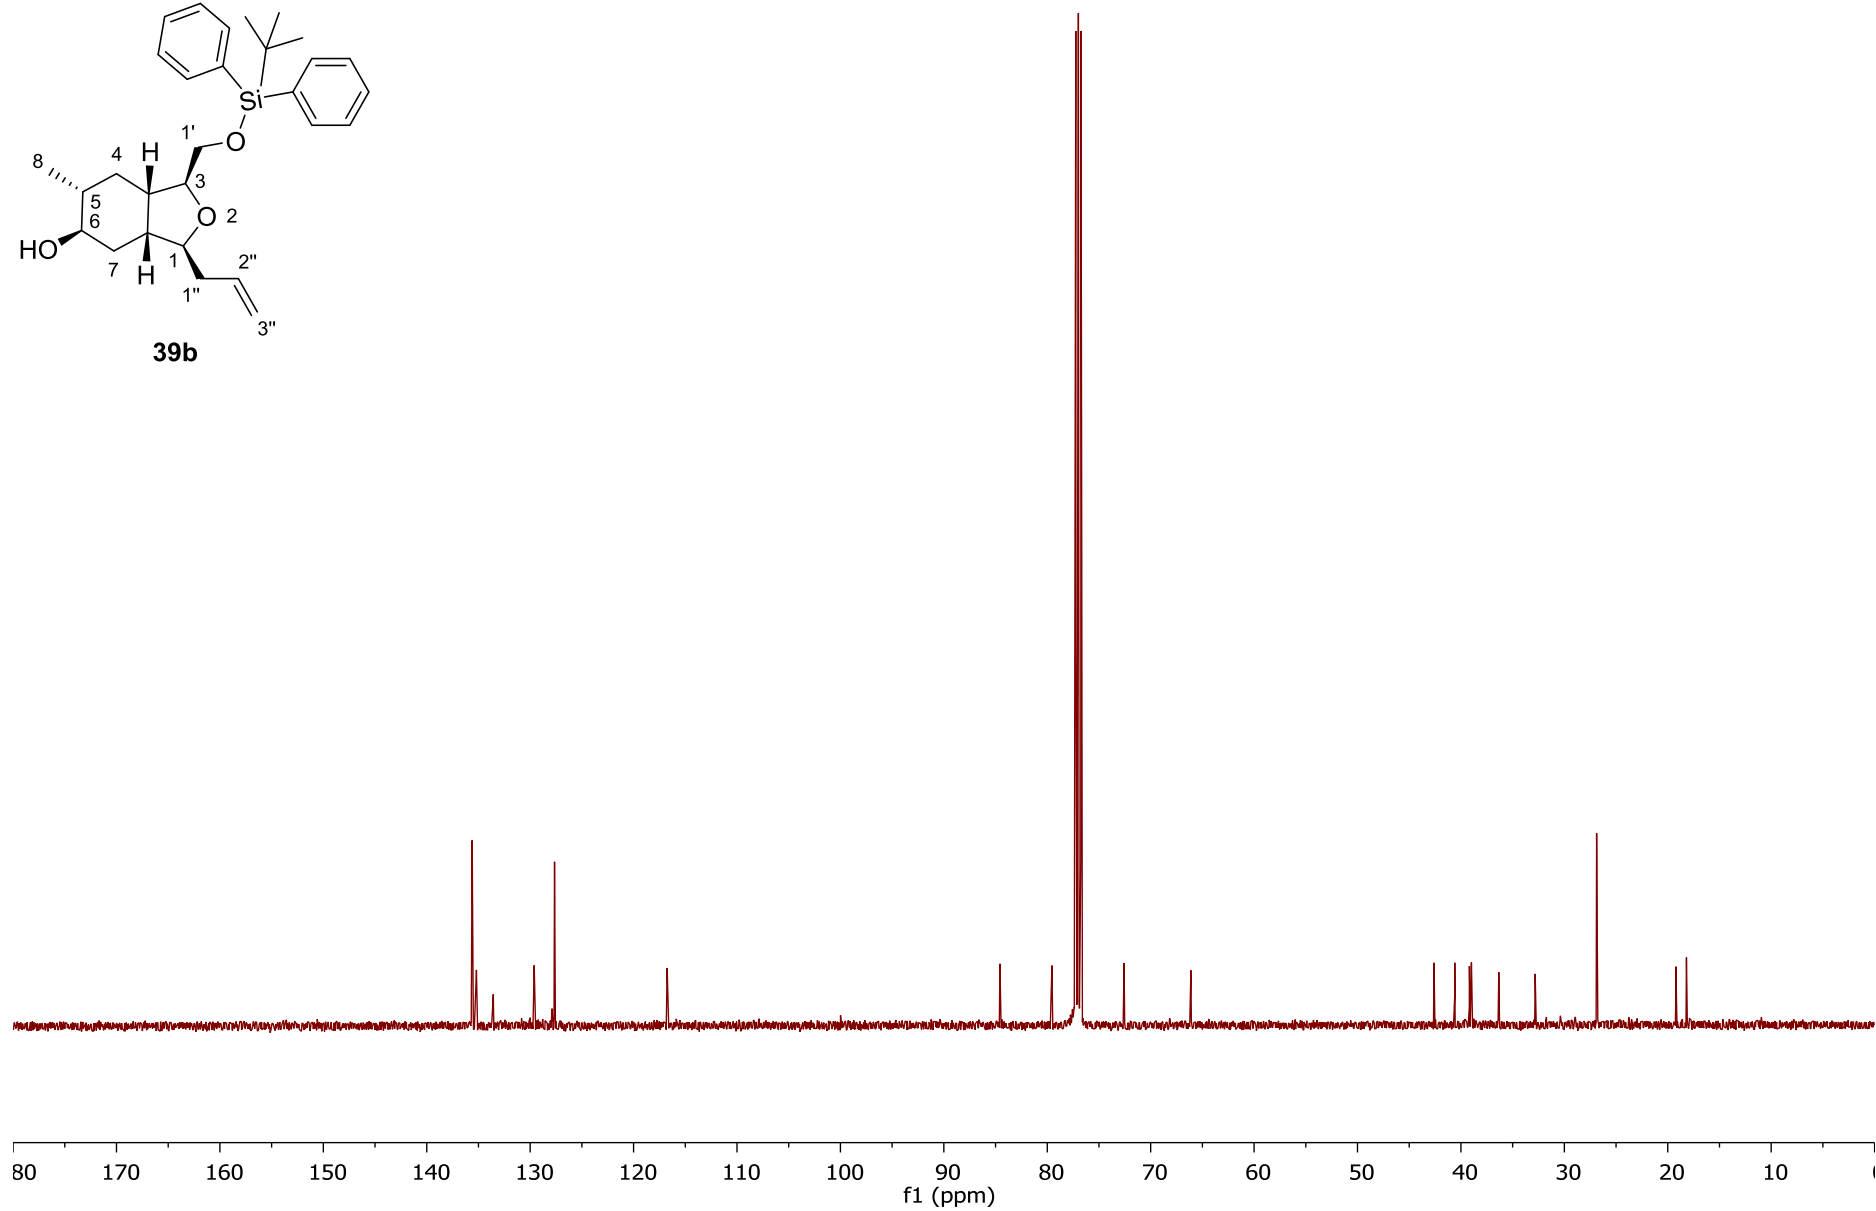

(1S,3S,3aR,5R,6R,7aS)-3-allyl-1-((tert-butylidiphenylsilyloxy)methyl)-6-methyloctahydroisobenzofuran-5-ol **39b**

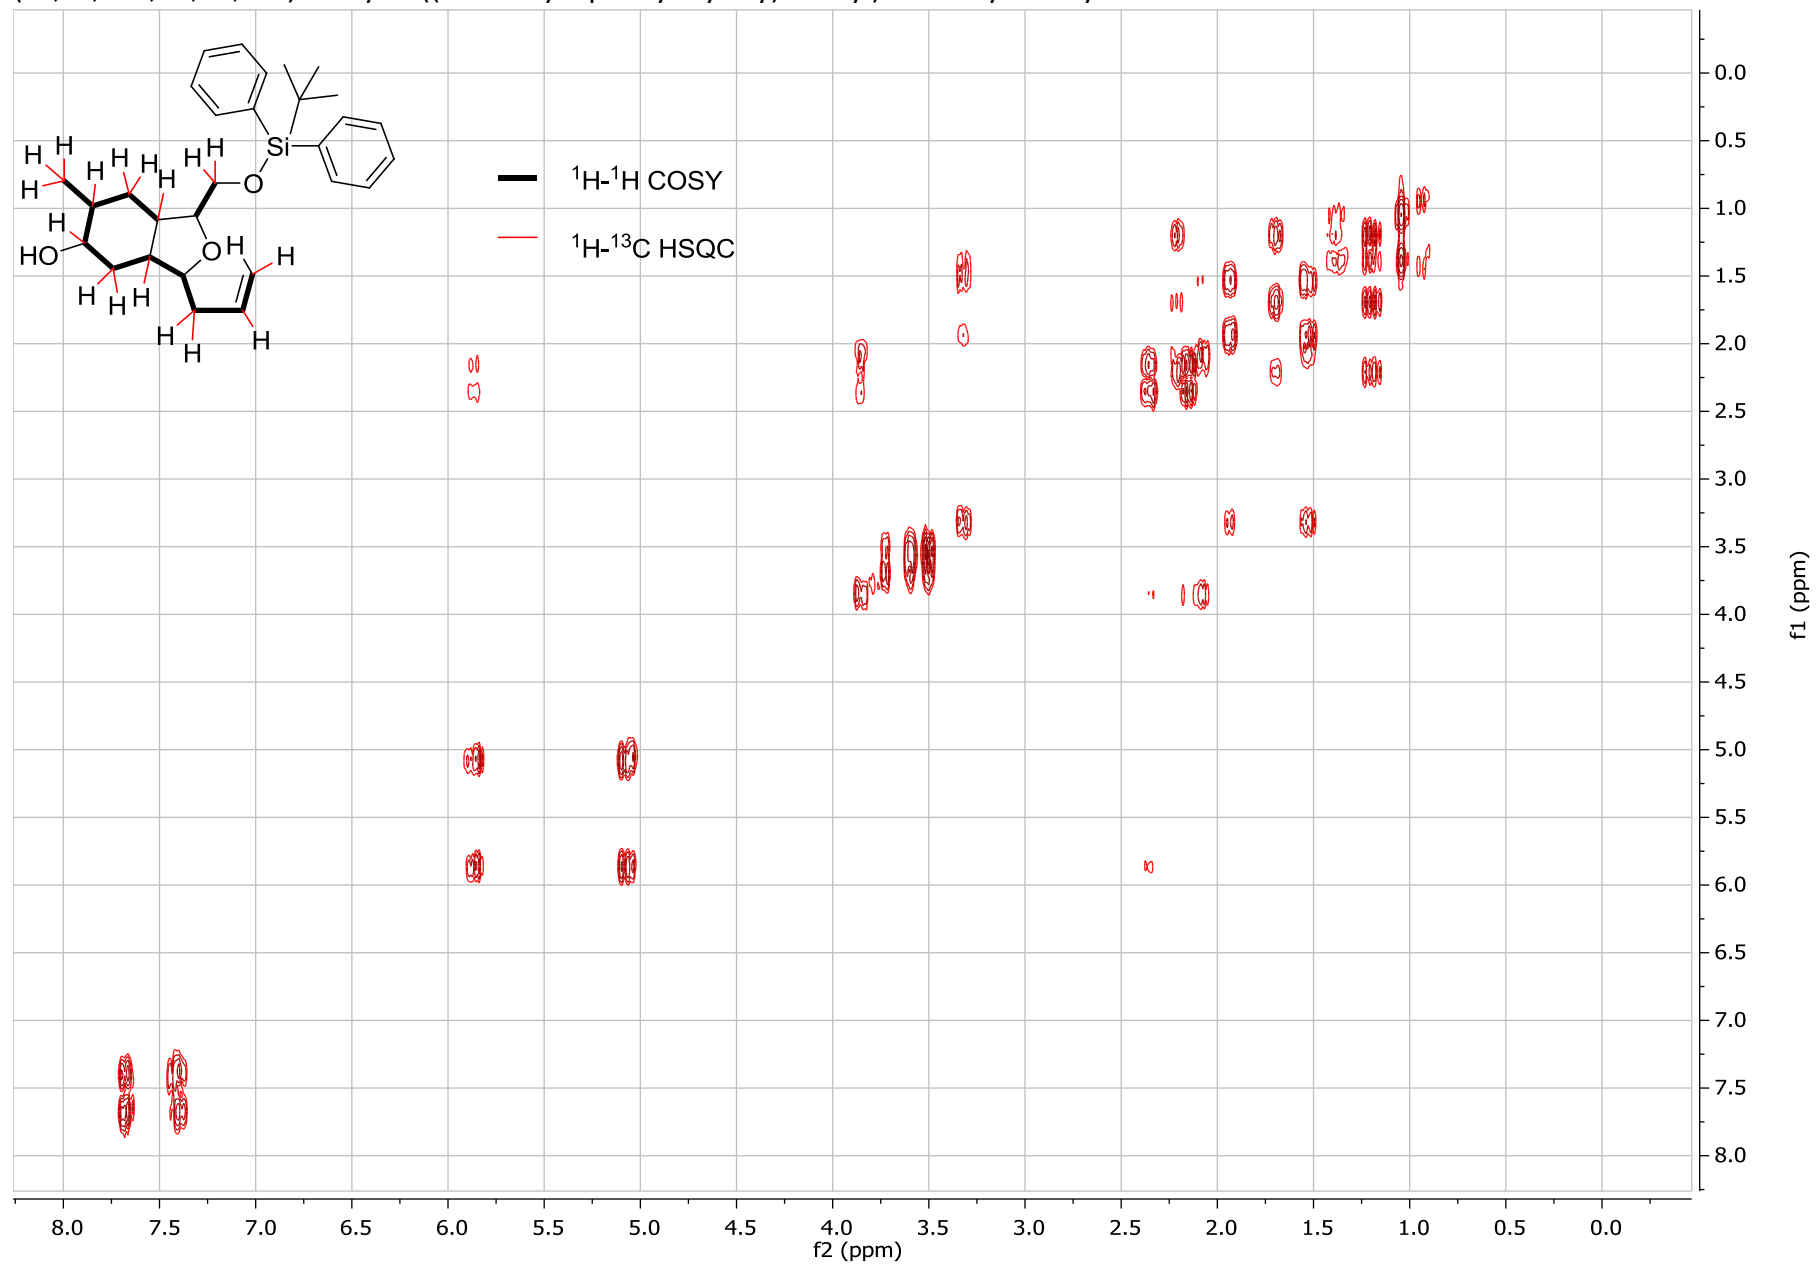

(1S,3S,3aR,5R,6R,7aS)-3-allyl-1-((tert-butylidiphenylsilyloxy)methyl)-6-methyloctahydroisobenzofuran-5-ol **39b**

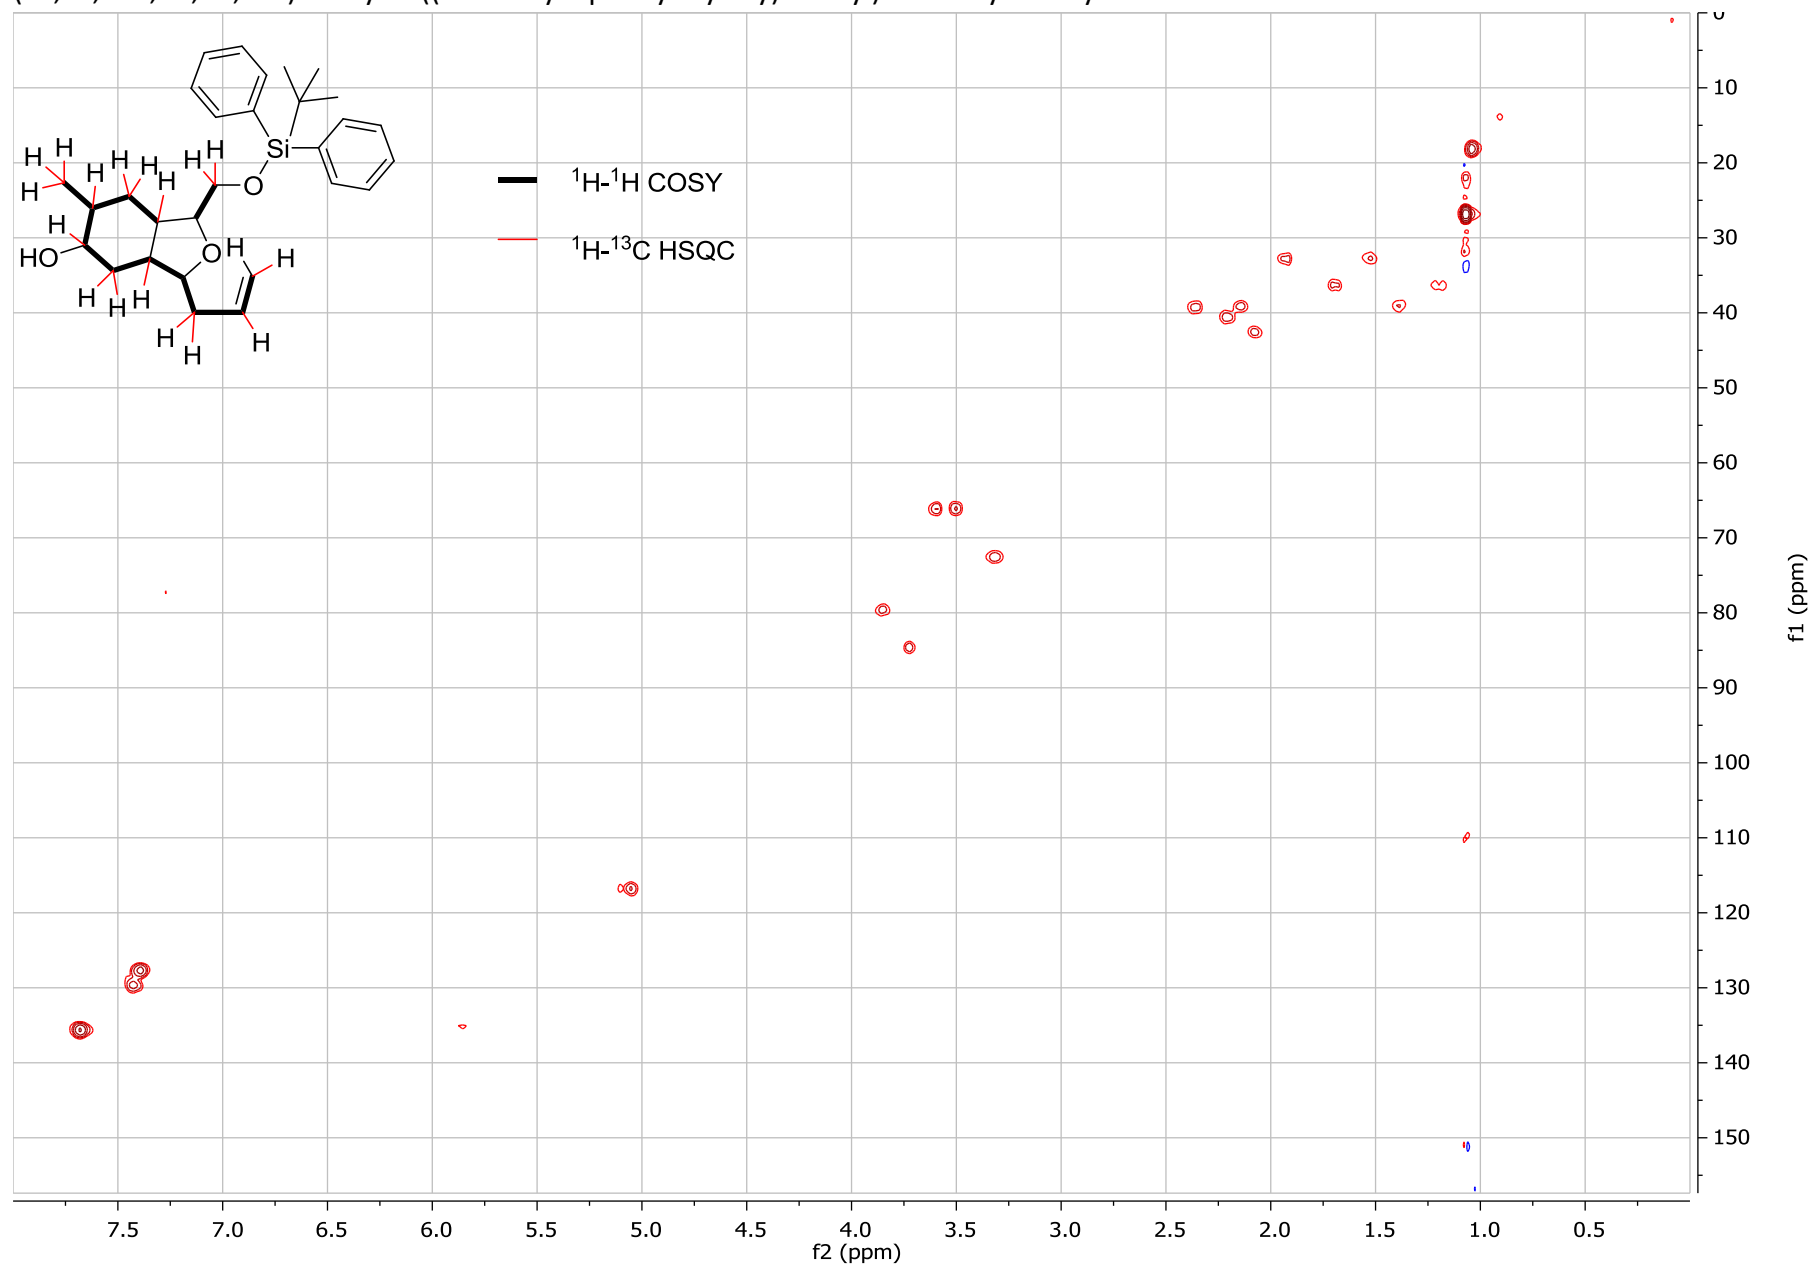



(1S,3S,3aR,5R,6R,7aS)-3-allyl-1-(hydroxymethyl)-6-methyloctahydroisobenzofuran-5-ol **86**

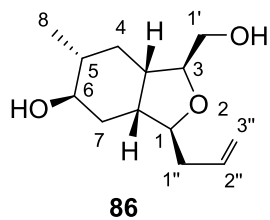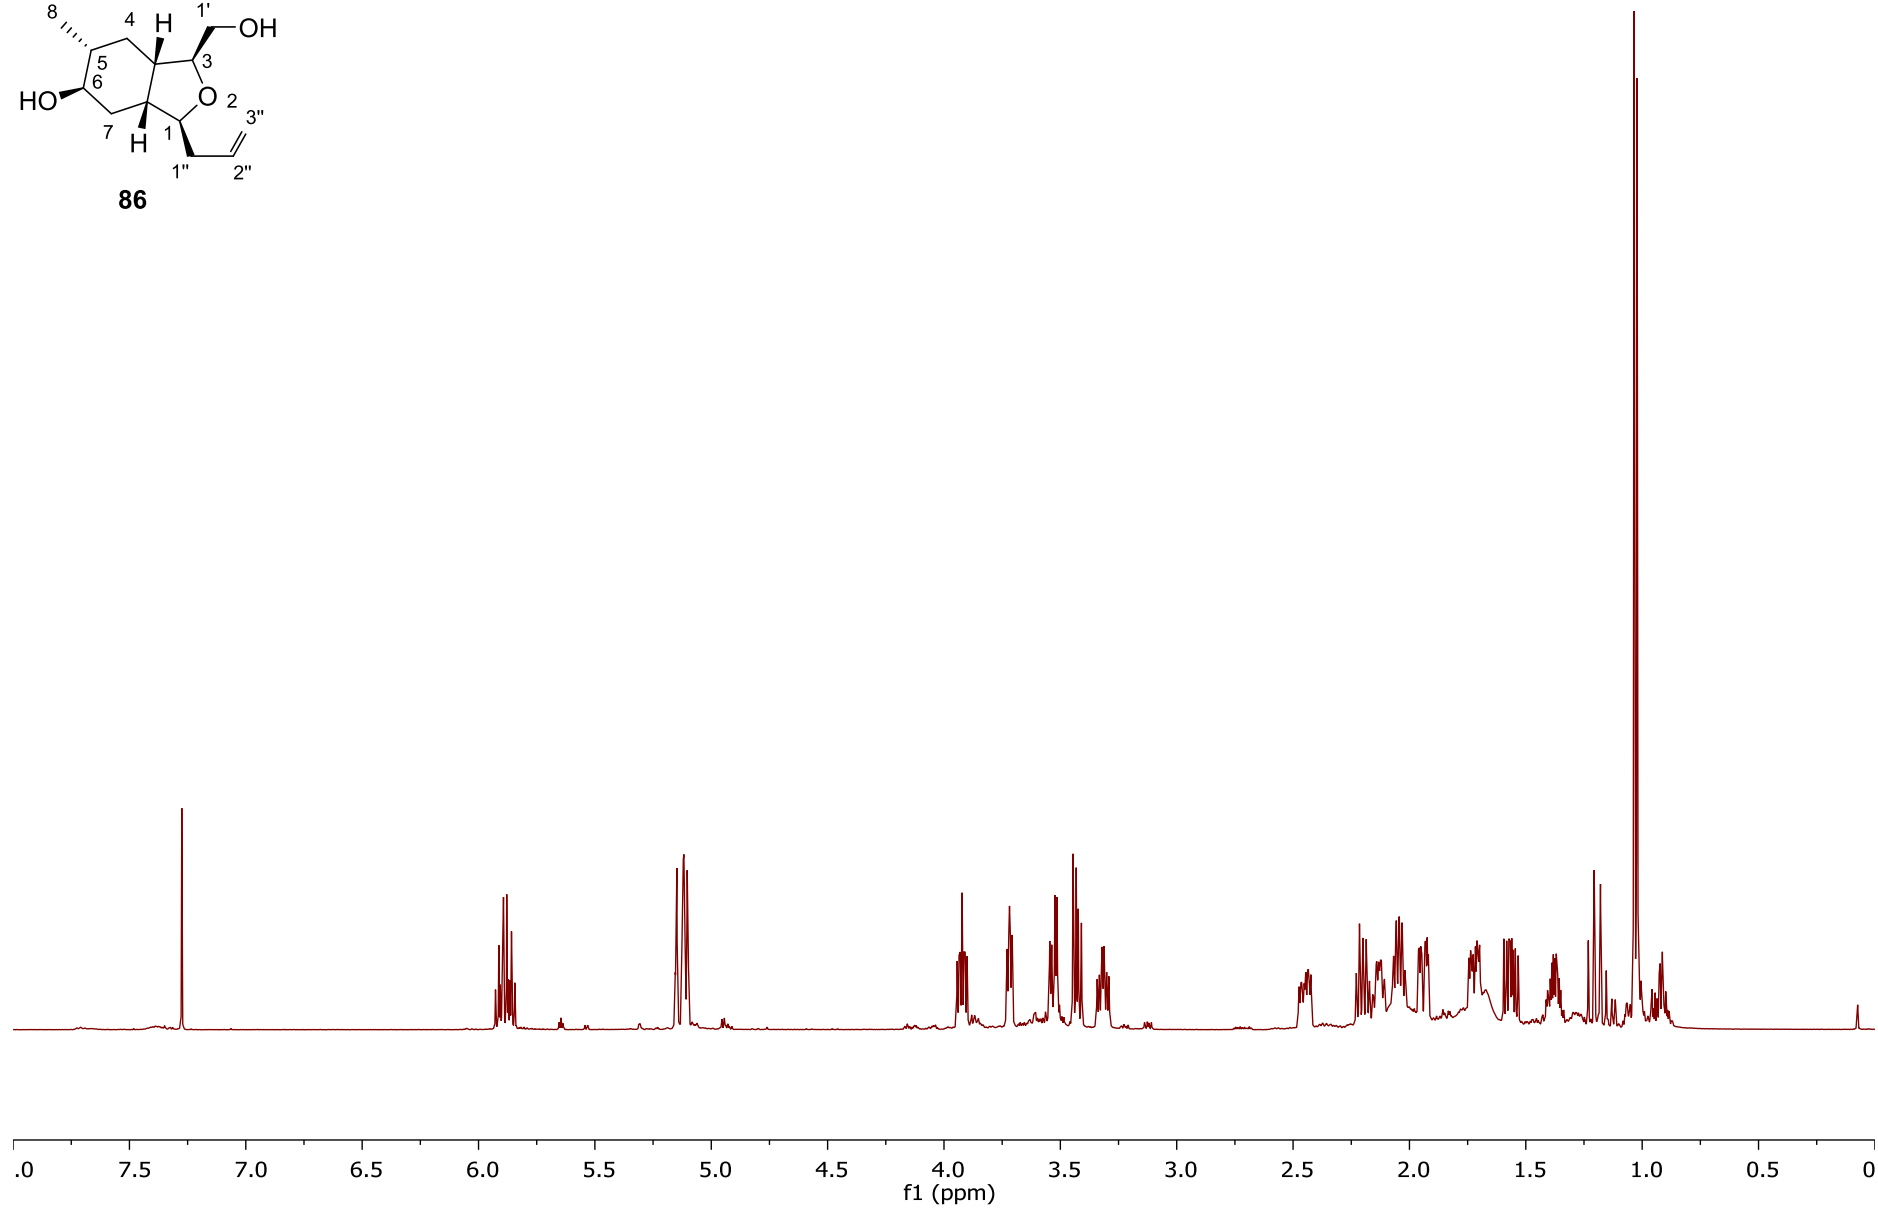

(1S,3S,3aR,5R,6R,7aS)-3-allyl-1-(hydroxymethyl)-6-methyloctahydroisobenzofuran-5-ol **86**

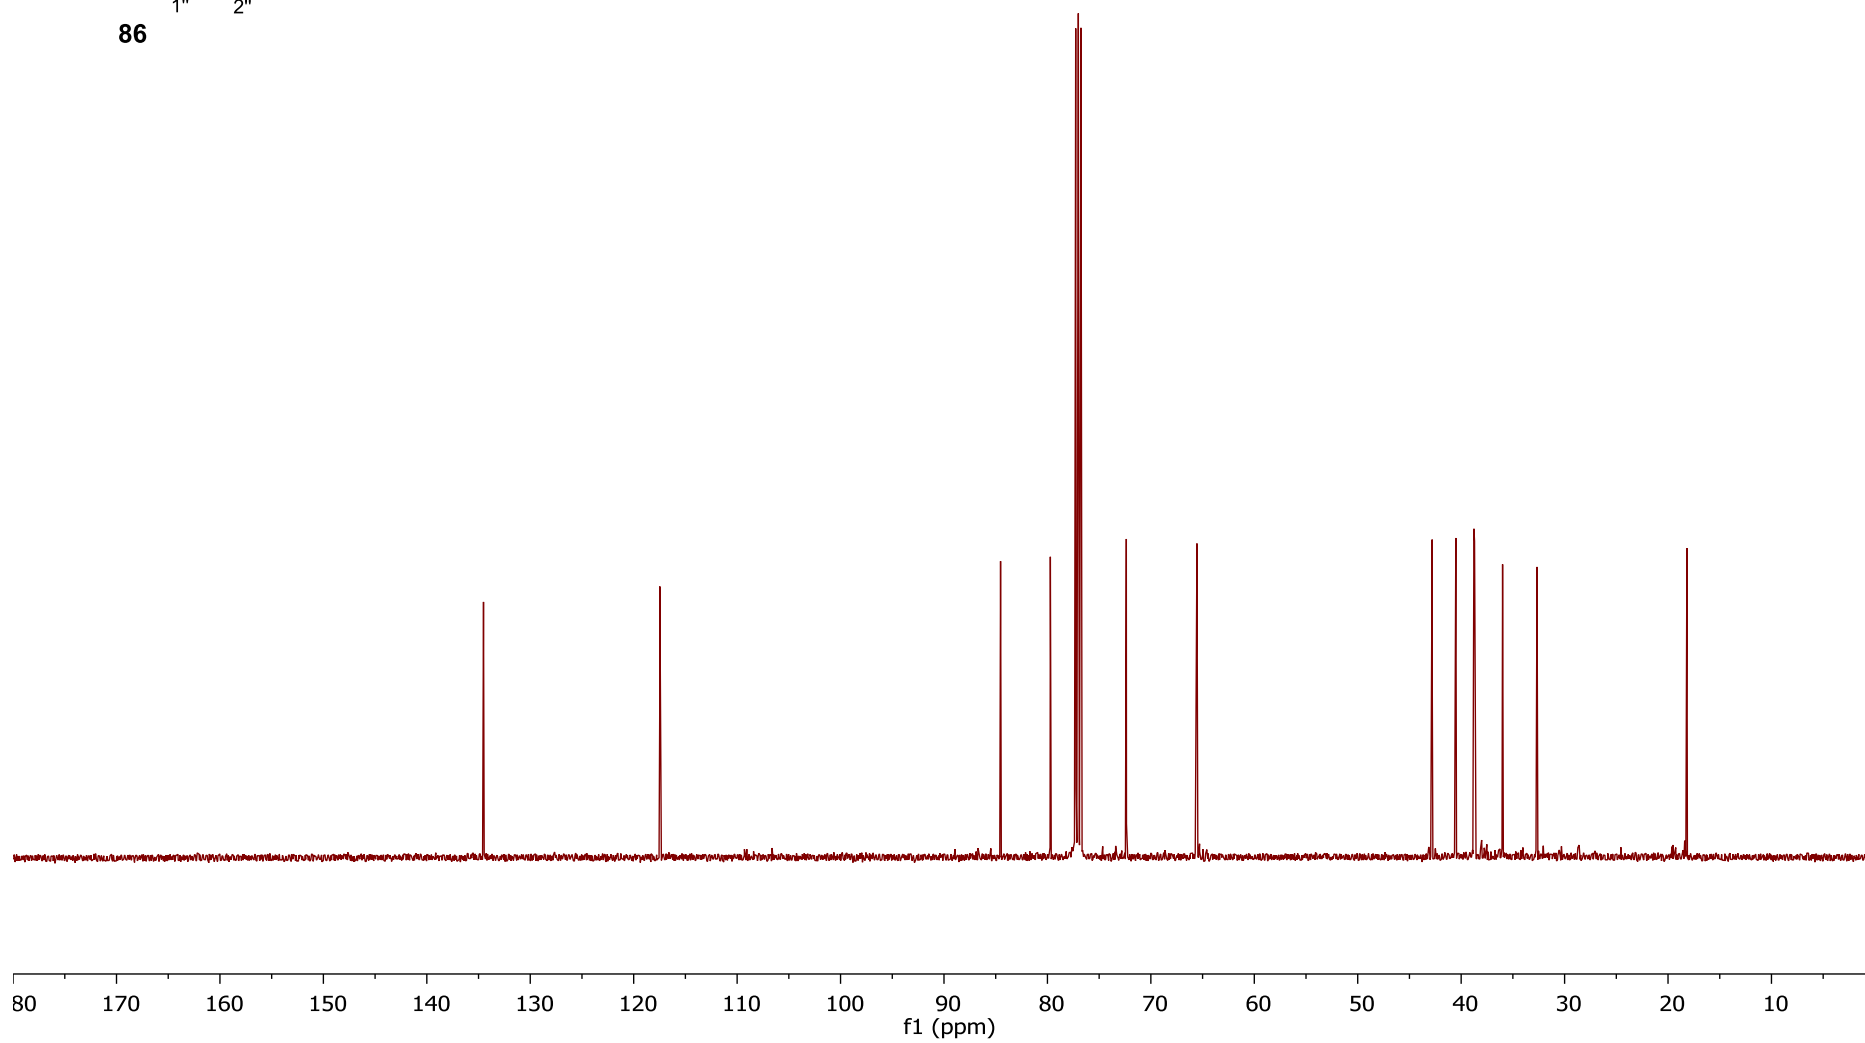

((1S,3S,3aR,5R,6R,7aS)-3-Allyl-5-hydroxy-6-methyloctahydroisobenzofuran-1-yl)methyl hex-5-enoate **87**

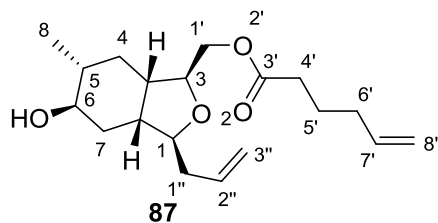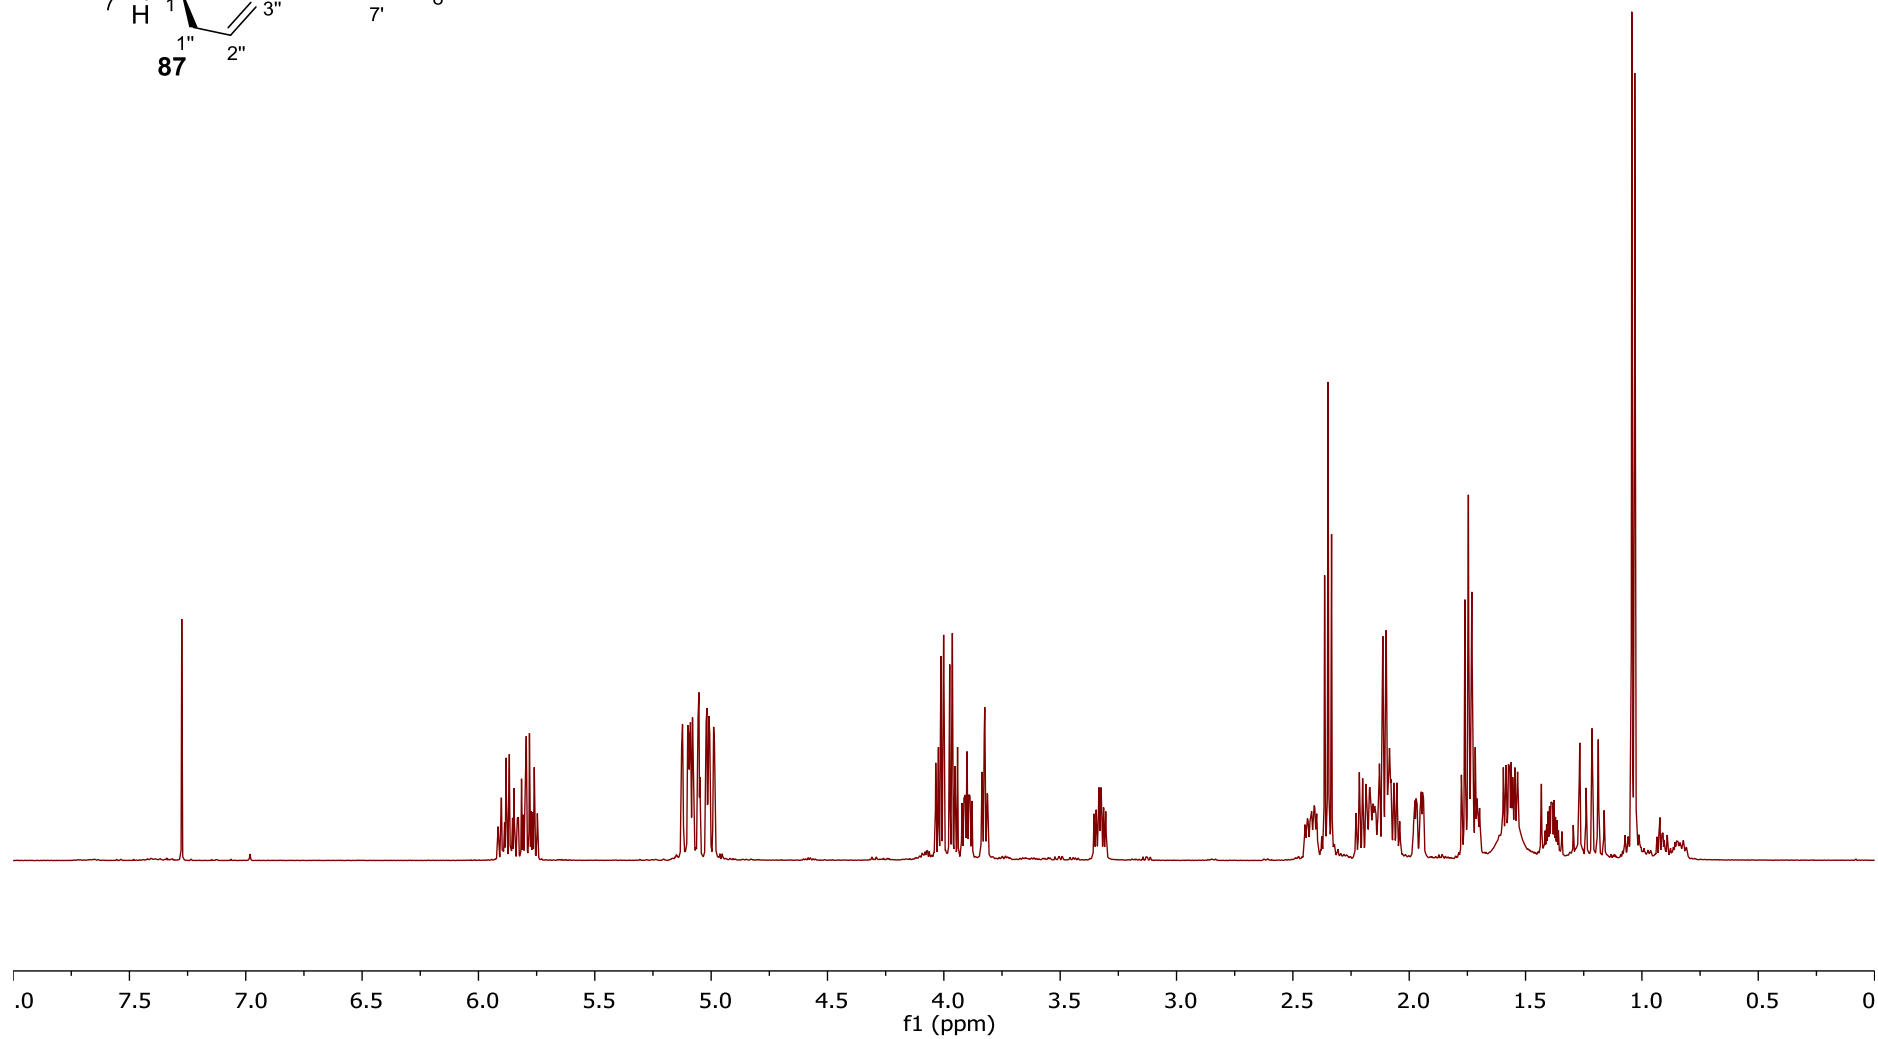

((1S,3S,3aR,5R,6R,7aS)-3-Allyl-5-hydroxy-6-methyloctahydroisobenzofuran-1-yl)methyl hex-5-enoate **87**

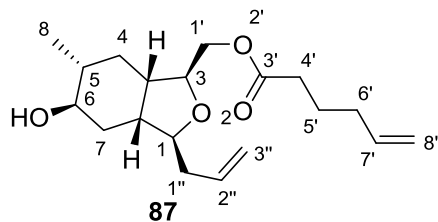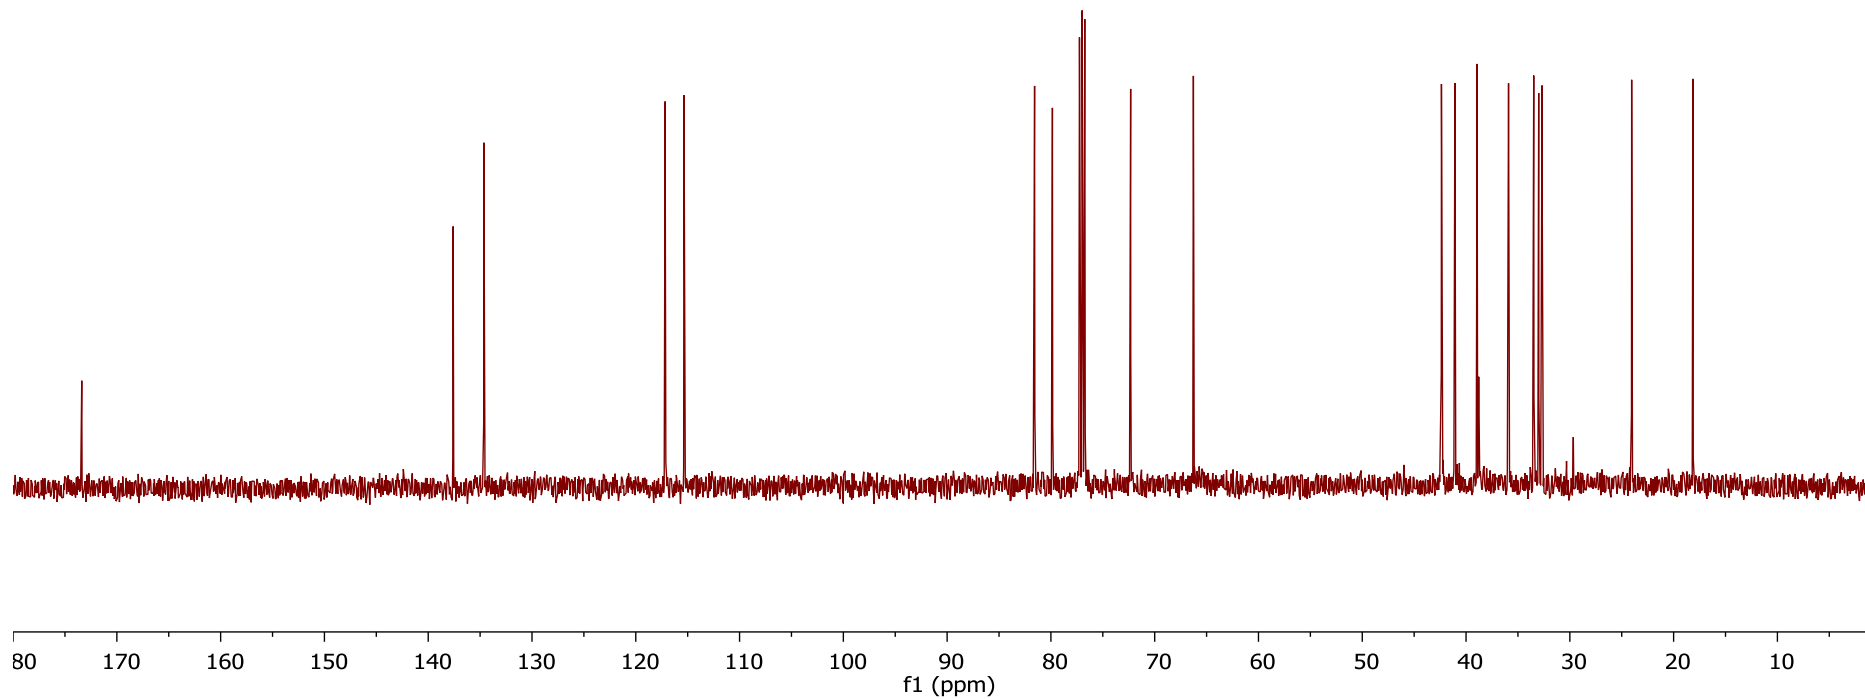

(1S,8E,11S,12R,14R,15R,17S)-14-hydroxy-15-methyl- 3,18-dioxatricyclo[9.6.1.0<sup>12,17</sup>]octadec-8-en-4- one **39**

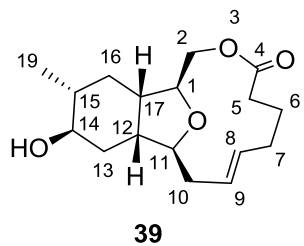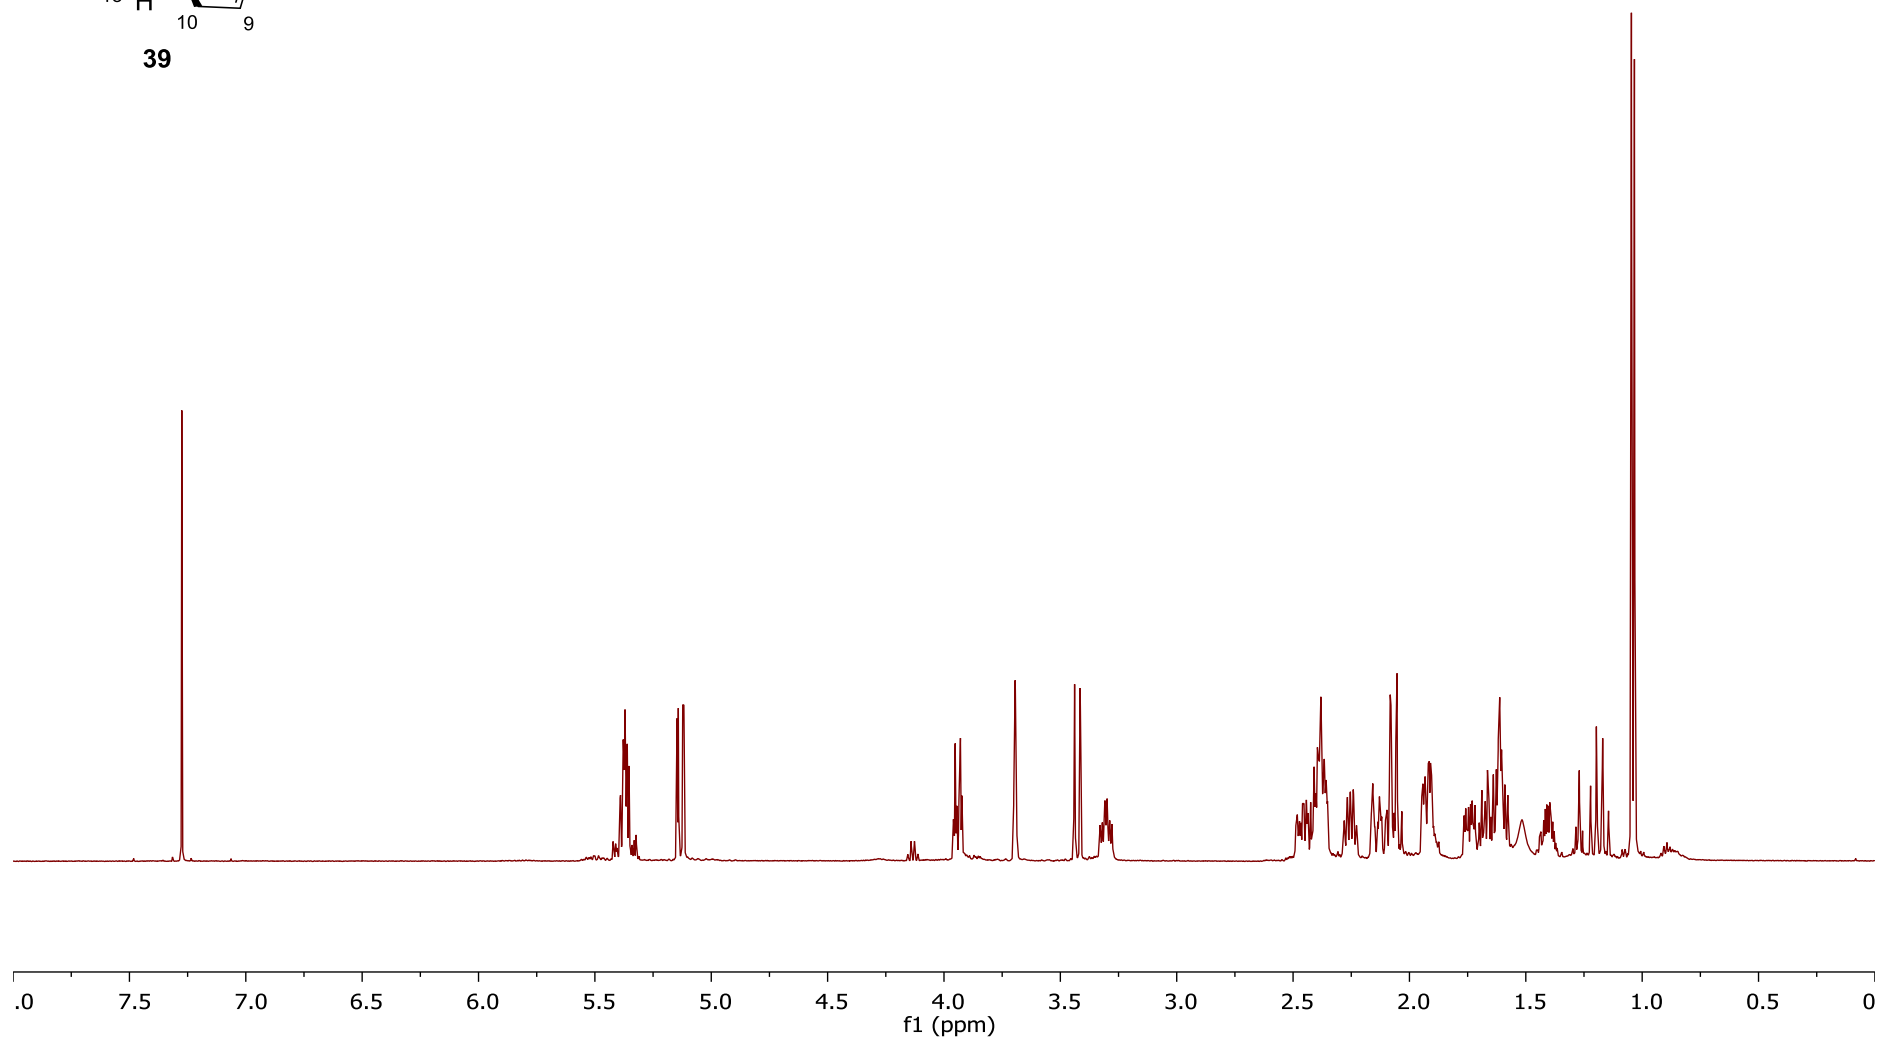

(1S,8E,11S,12R,14R,15R,17S)-14-hydroxy-15-methyl- 3,18-dioxatricyclo[9.6.1.0<sup>12,17</sup>]octadec-8-en-4- one **39**

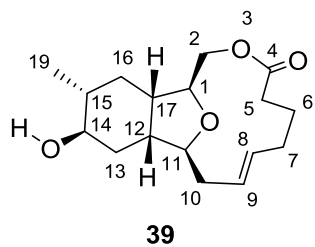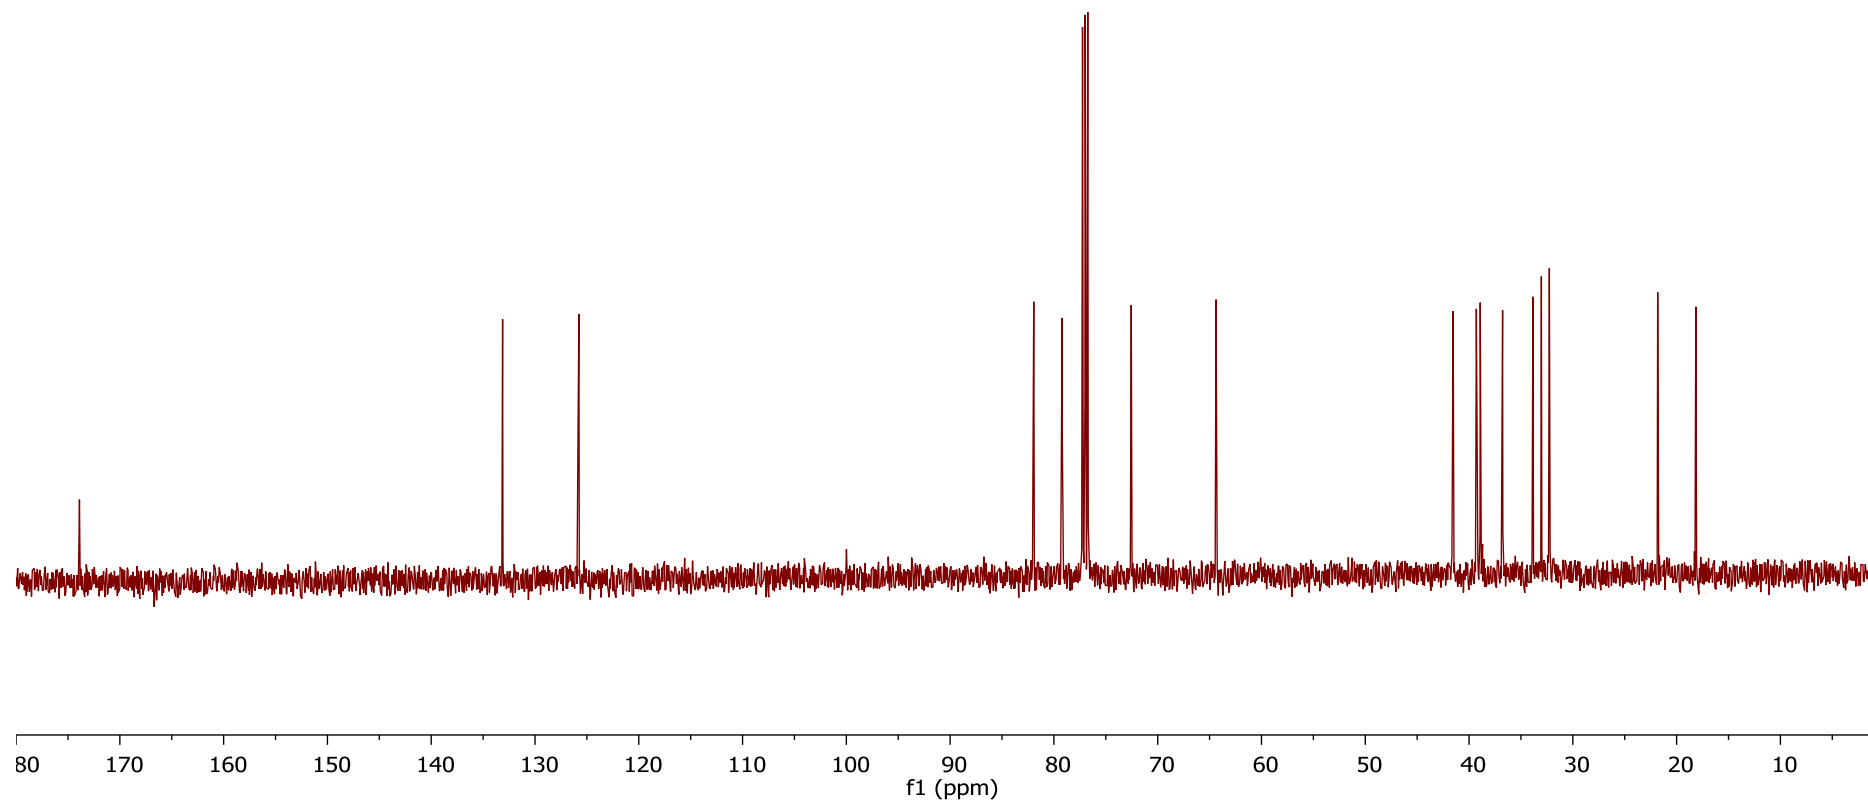

(1S,2R,5S,6S,7R)-5-(*tert*-Butyldiphenylsilyloxy)methyl)-4-oxa-tricyclo[5.2.2.0<sup>2,6</sup>]undec-8-en-3-one **40a**

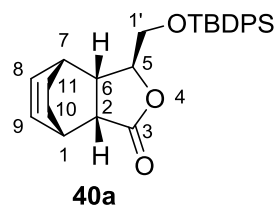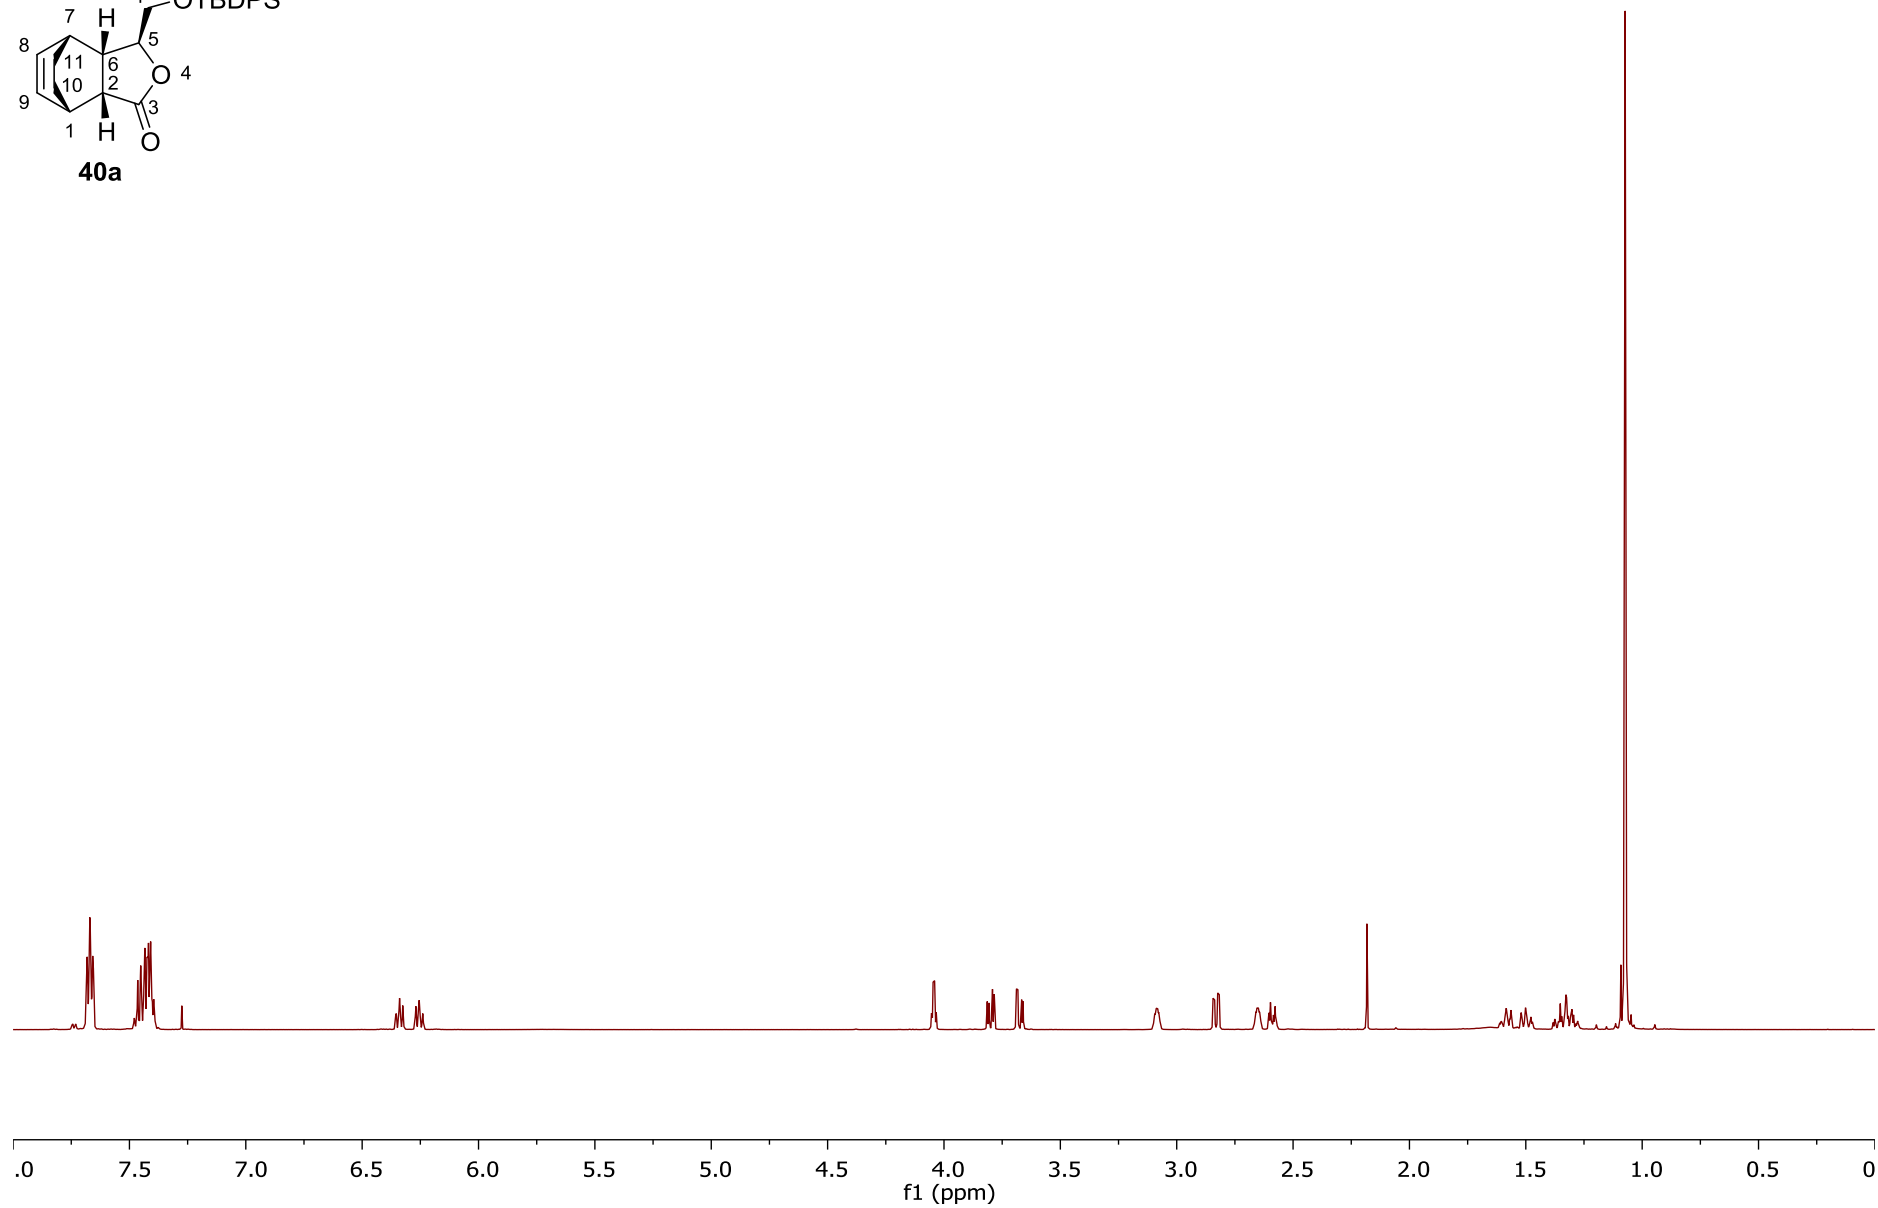

(1S,2R,5S,6S,7R)-5-(*tert*-Butyldiphenylsilyloxymethyl)-4-oxa-tricyclo[5.2.2.0<sup>2,6</sup>]undec-8-en-3-one **40a**

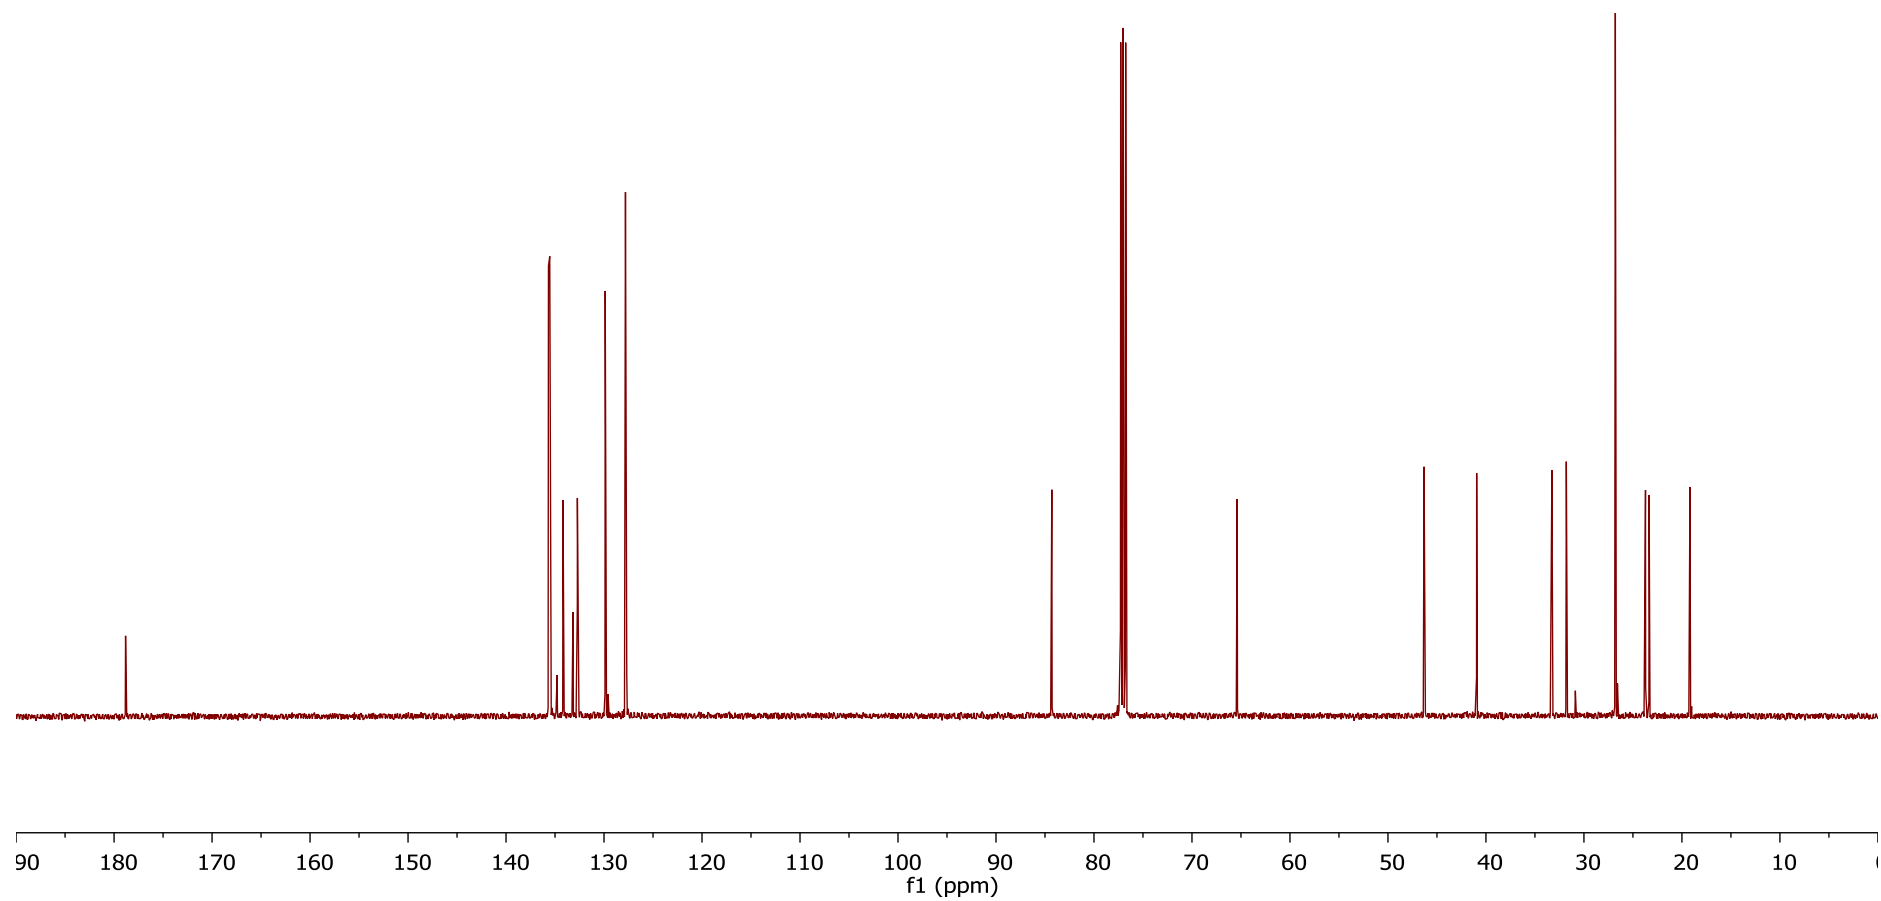



(1S,2R,5S,6S,7R)-5-(*tert*-Butyldiphenylsilyloxymethyl)-4-oxa-tricyclo[5.2.2.0<sup>2,6</sup>]undec-8-en-3-ol **40b**

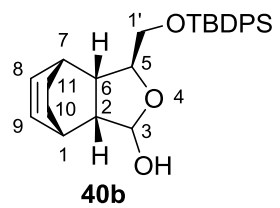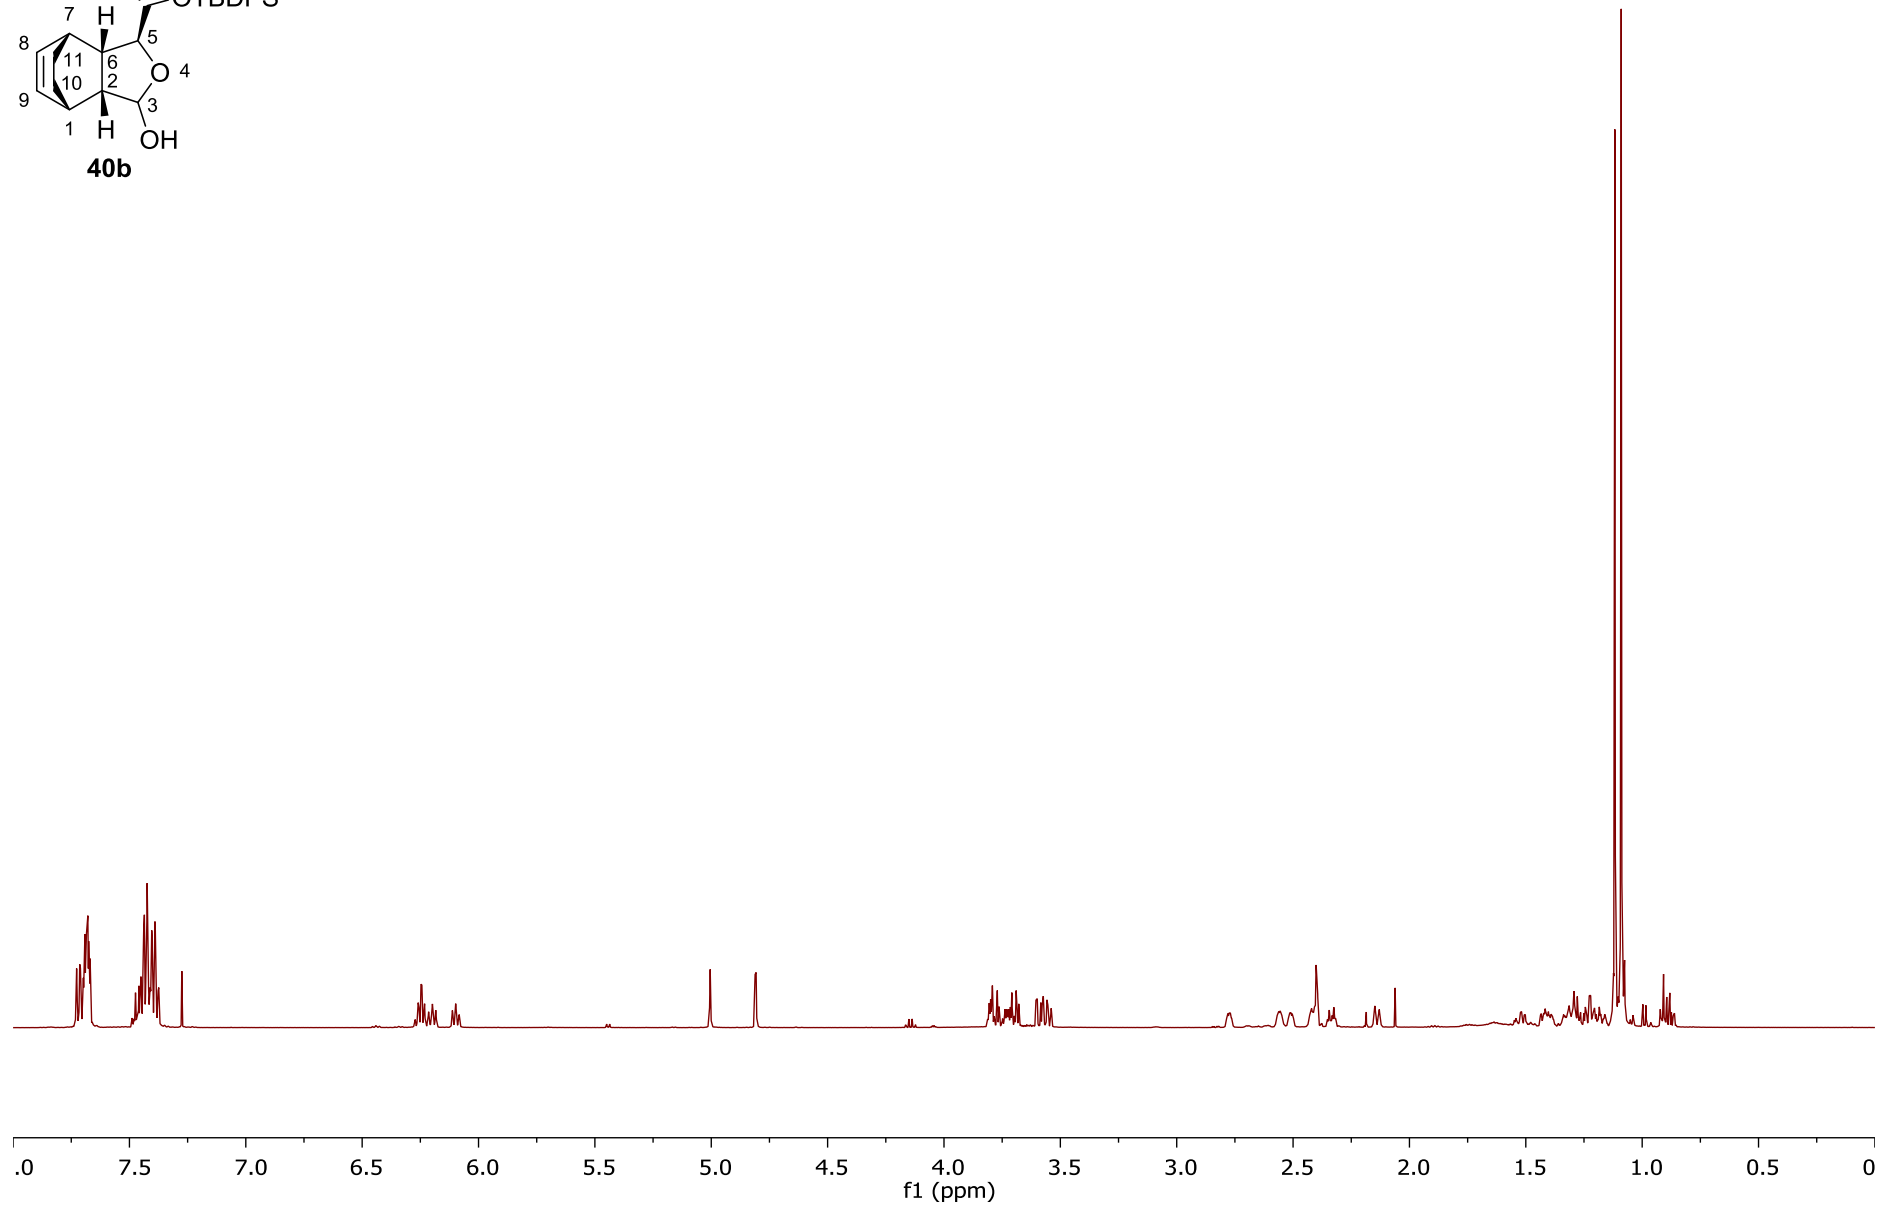

(1S,2R,5S,6S,7R)-5-(*tert*-Butyldiphenylsilyloxymethyl)-4-oxa-tricyclo[5.2.2.0<sup>2,6</sup>]undec-8-en-3-ol **40b**

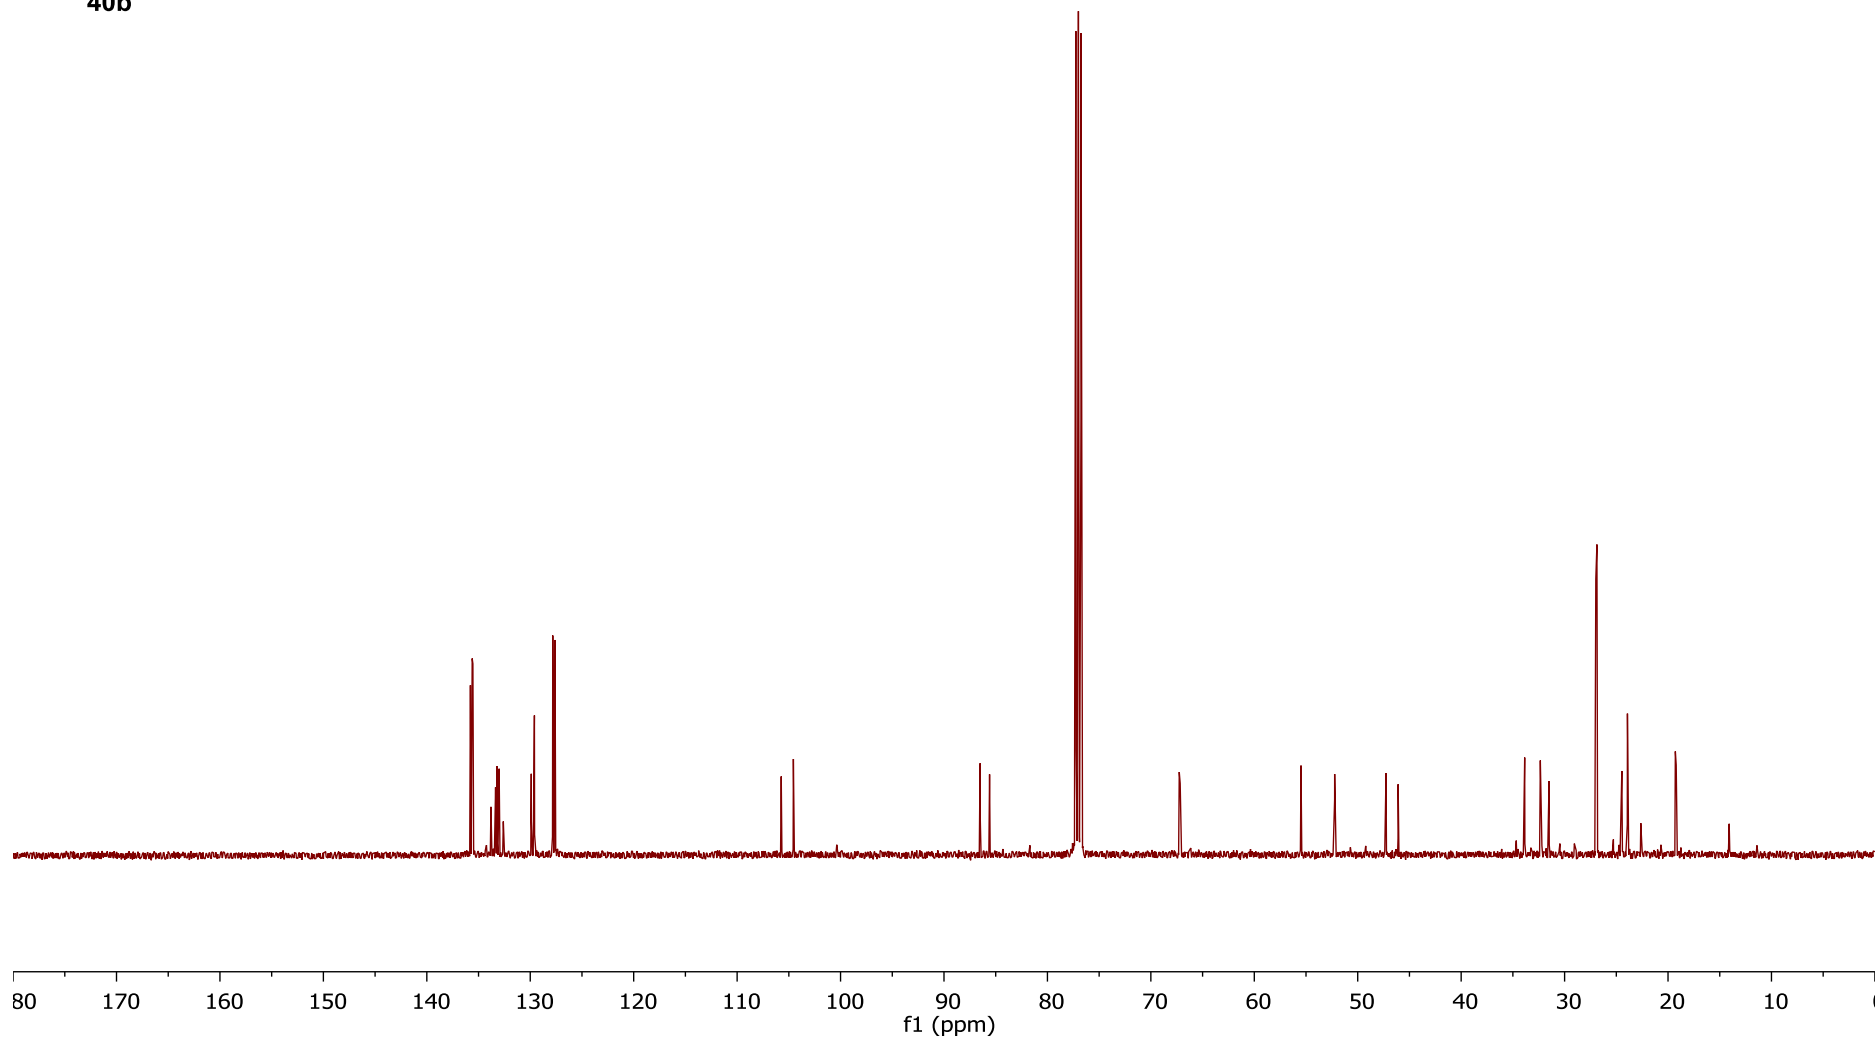

((1R, 2S, 3S, 5S, 6R, 7S)-5-allyl-4-oxatricyclo[5.2.2.0<sup>2,6</sup>]undec-8-en-3-ylmethoxy)*tert*butyl diphenylsilane **40c**

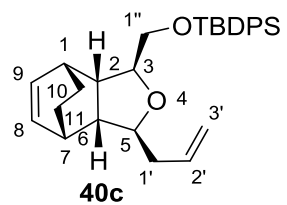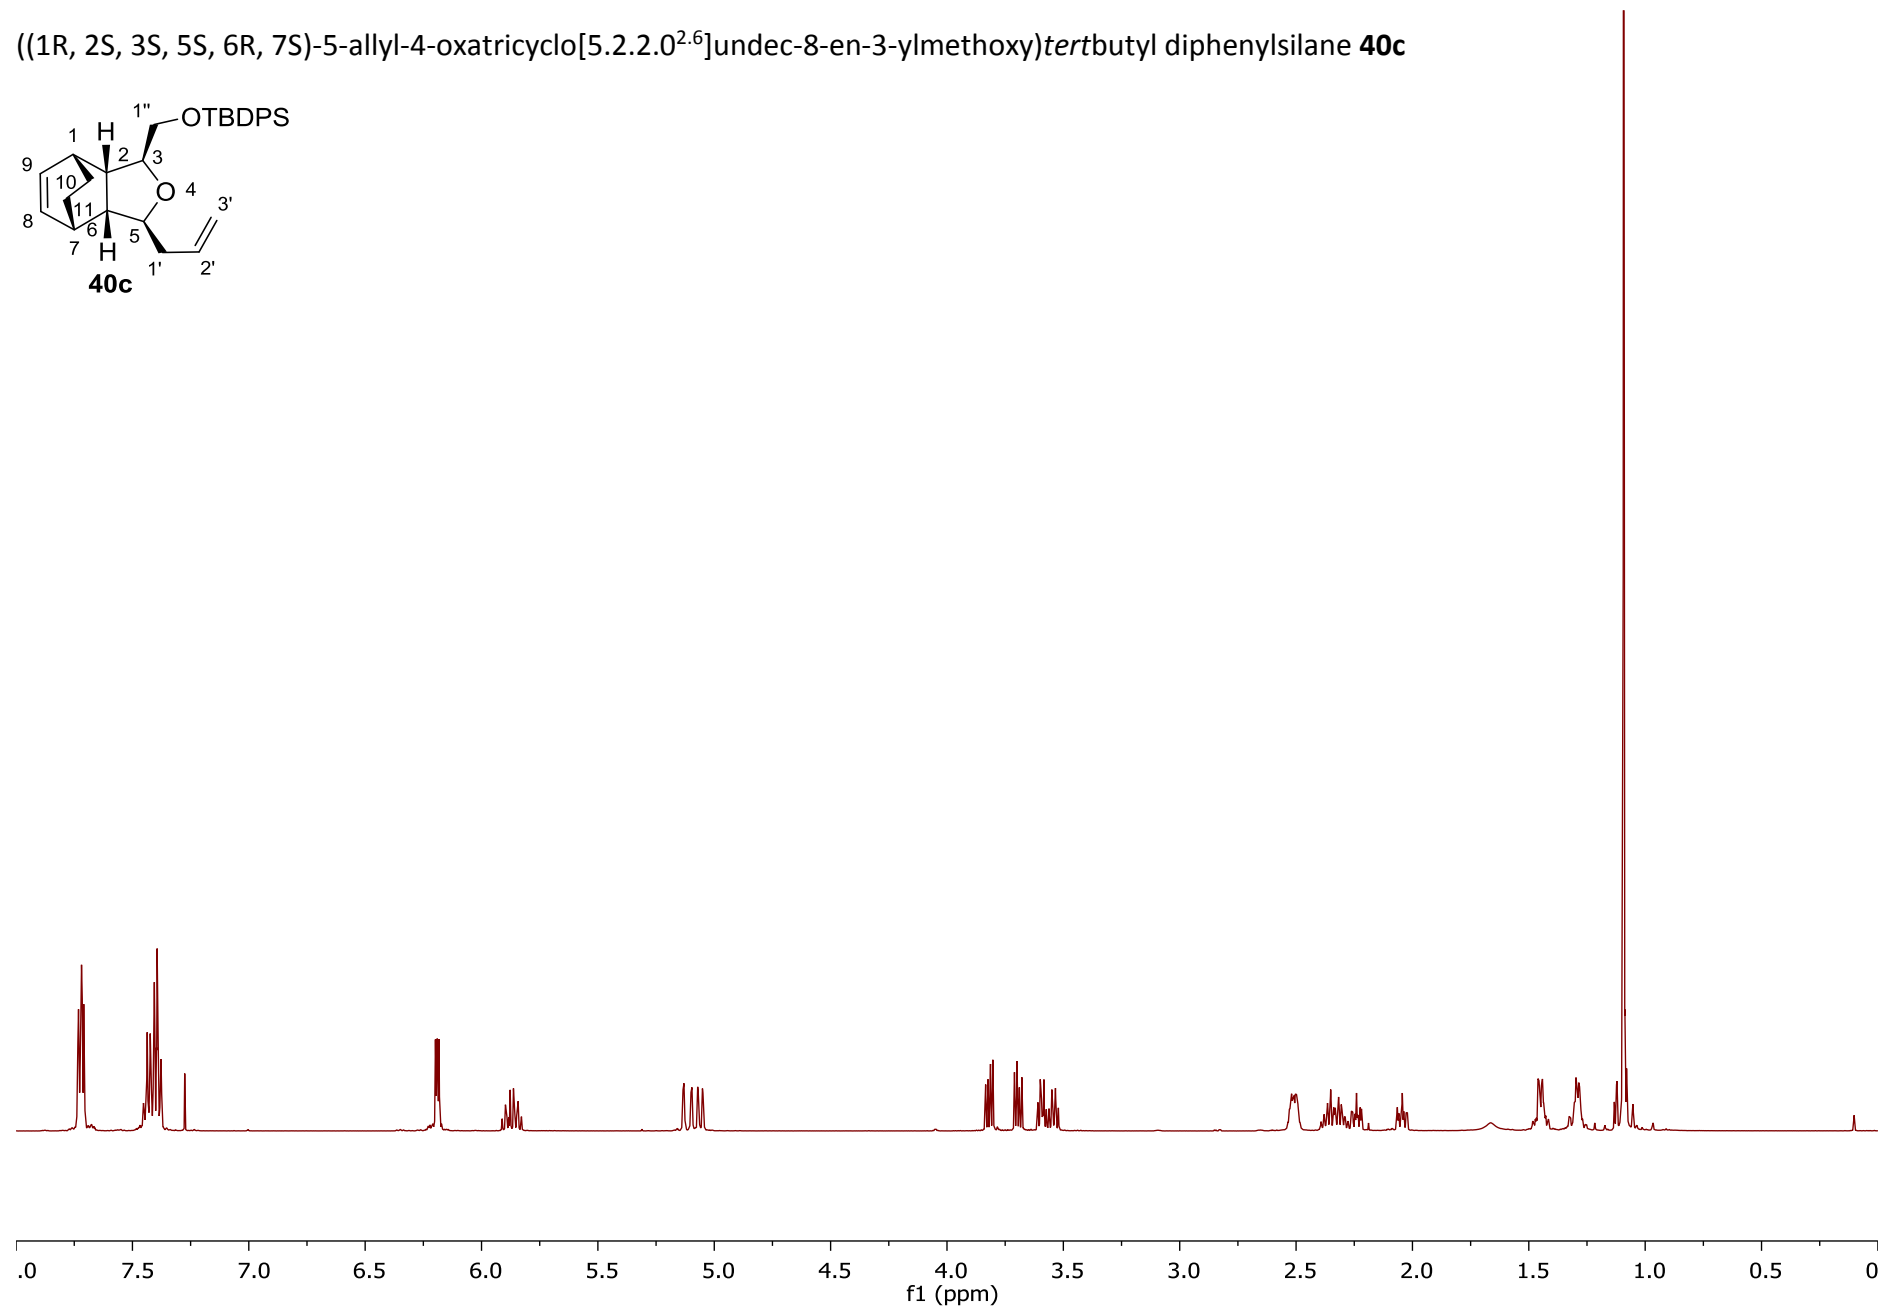

((1R, 2S, 3S, 5S, 6R, 7S)-5-allyl-4-oxatricyclo[5.2.2.0<sup>2,6</sup>]undec-8-en-3-ylmethoxy)*tert*butyl diphenylsilane **40c**

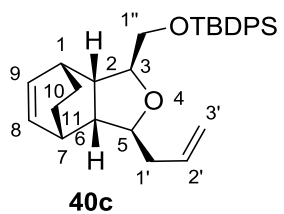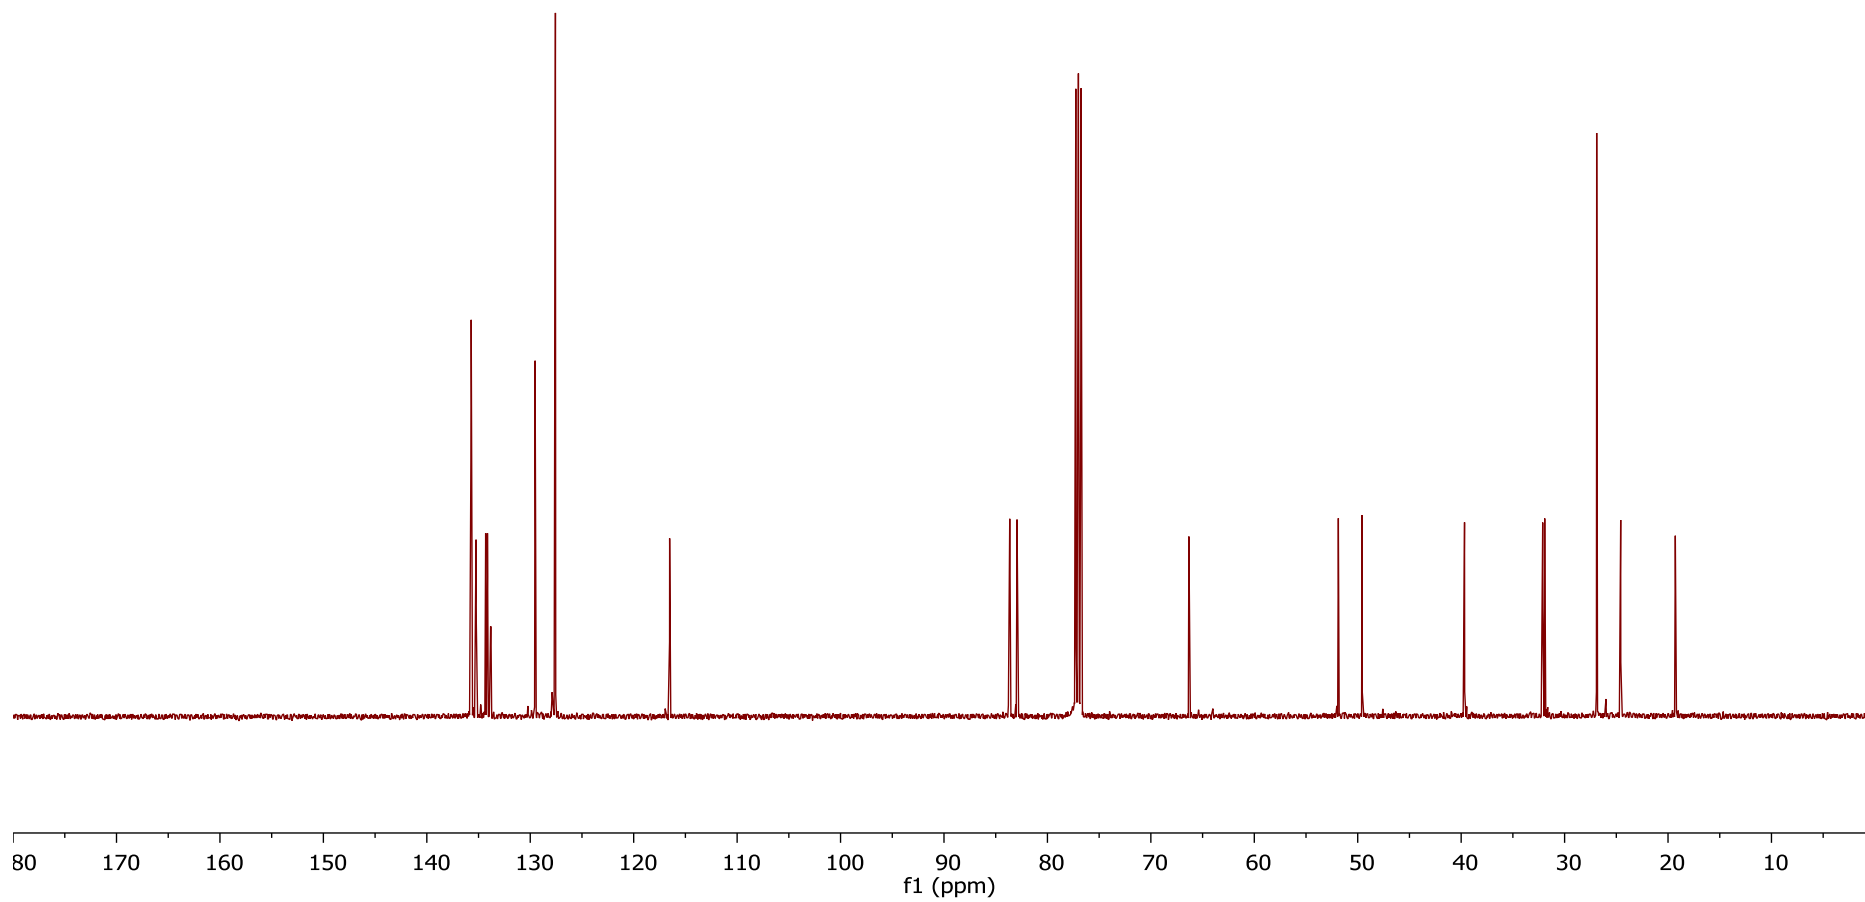

((1R, 2S, 3S, 5S, 6R, 7S)-5-allyl-4-oxatricyclo[5.2.2.0<sup>2,6</sup>]undec-8-en-3-yl)-methanol **84**

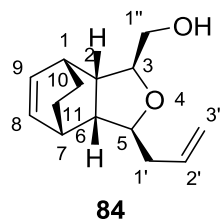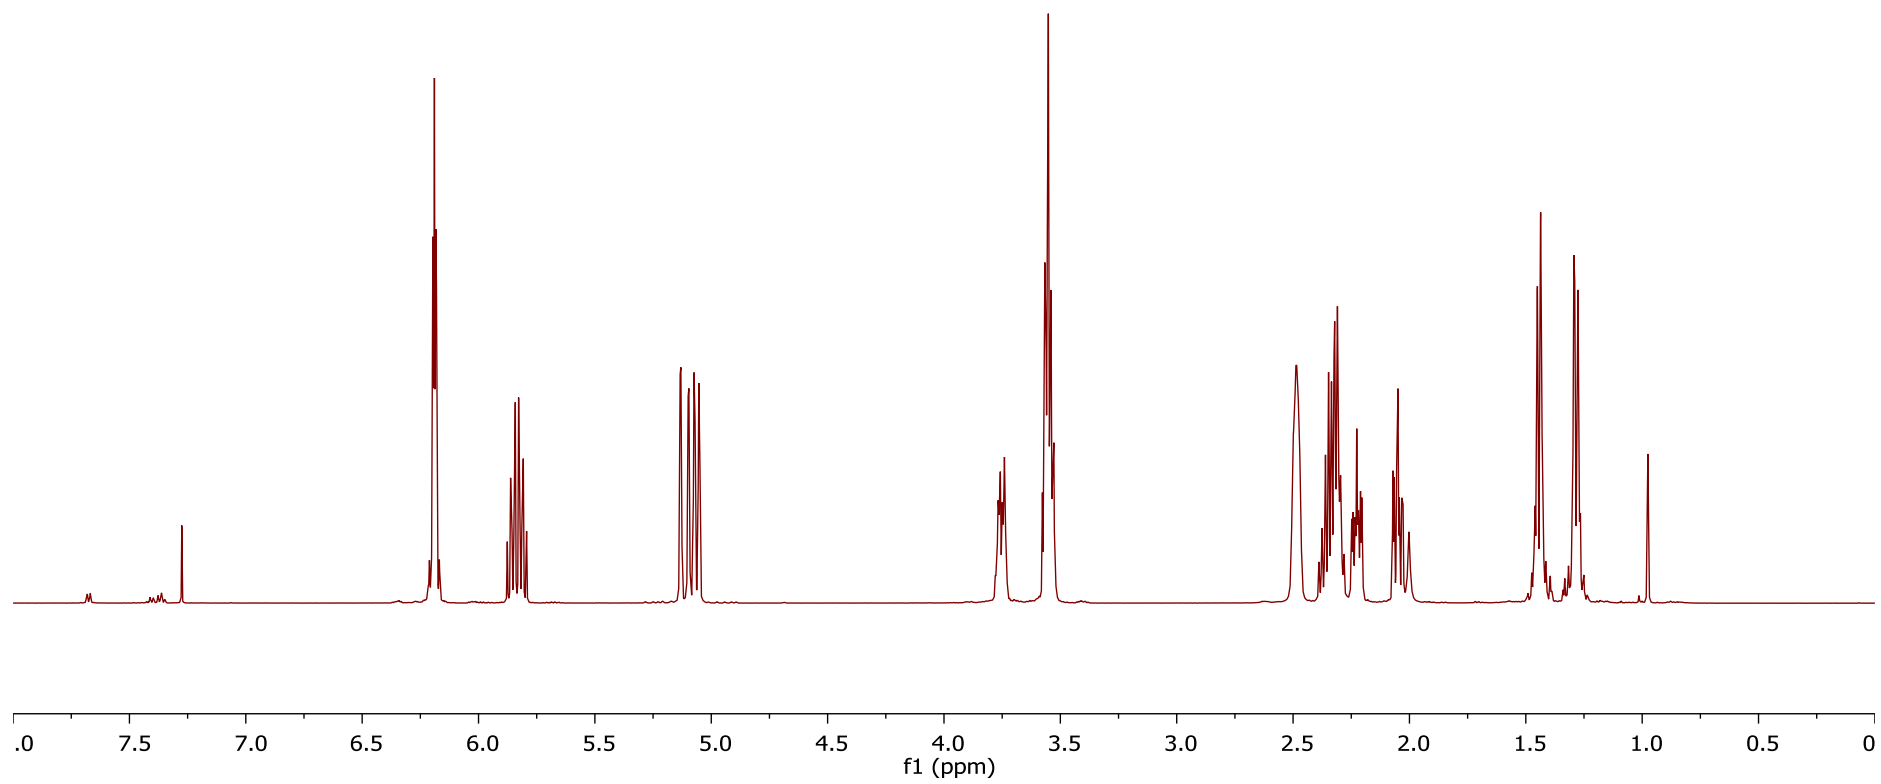

((1R, 2S, 3S, 5S, 6R, 7S)-5-allyl-4-oxatricyclo[5.2.2.0<sup>2,6</sup>]undec-8-en-3-yl)-methanol **84**

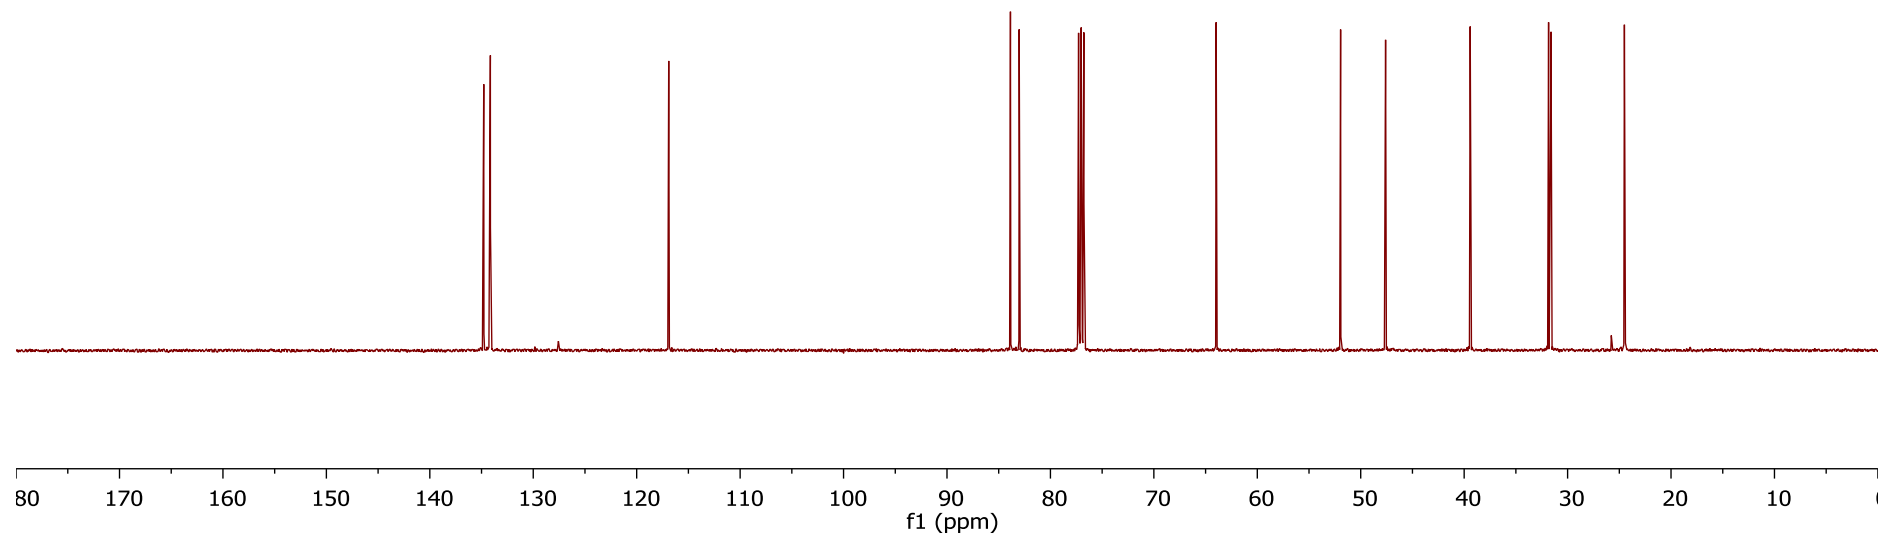

(1R,2S,3S,5S,6R,7S)-5-Allyl-4-oxatricyclo[5.2.2.0<sup>2,6</sup>]undec-8-en-3-ylmethyl hex-5-enoate **85**

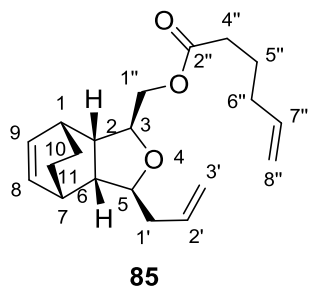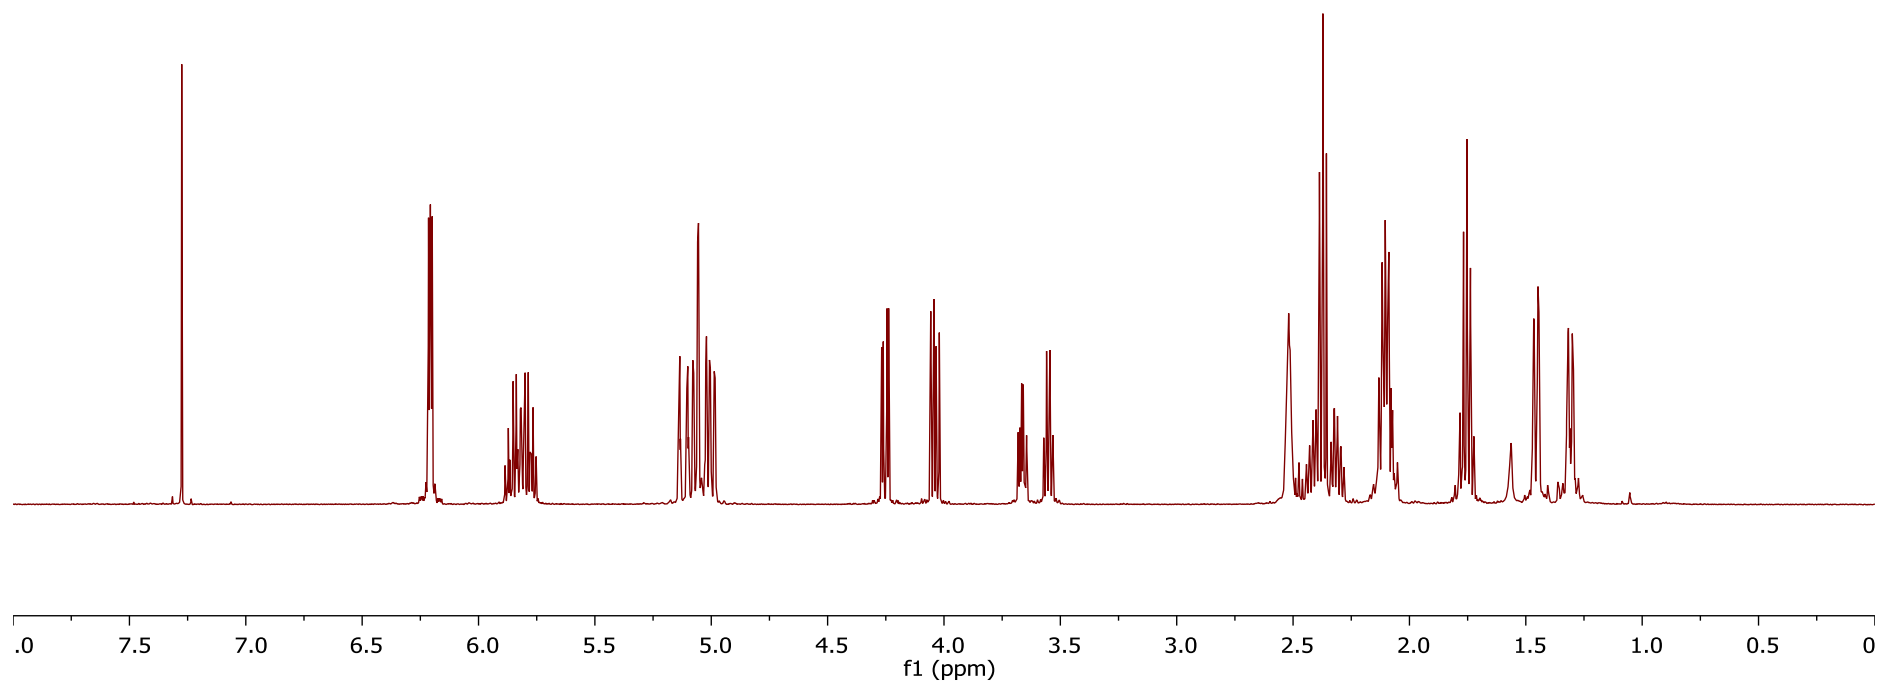

(1R,2S,3S,5S,6R,7S)-5-Allyl-4-oxatricyclo[5.2.2.0<sup>2,6</sup>]undec-8-en-3-ylmethyl hex-5-enoate **85**

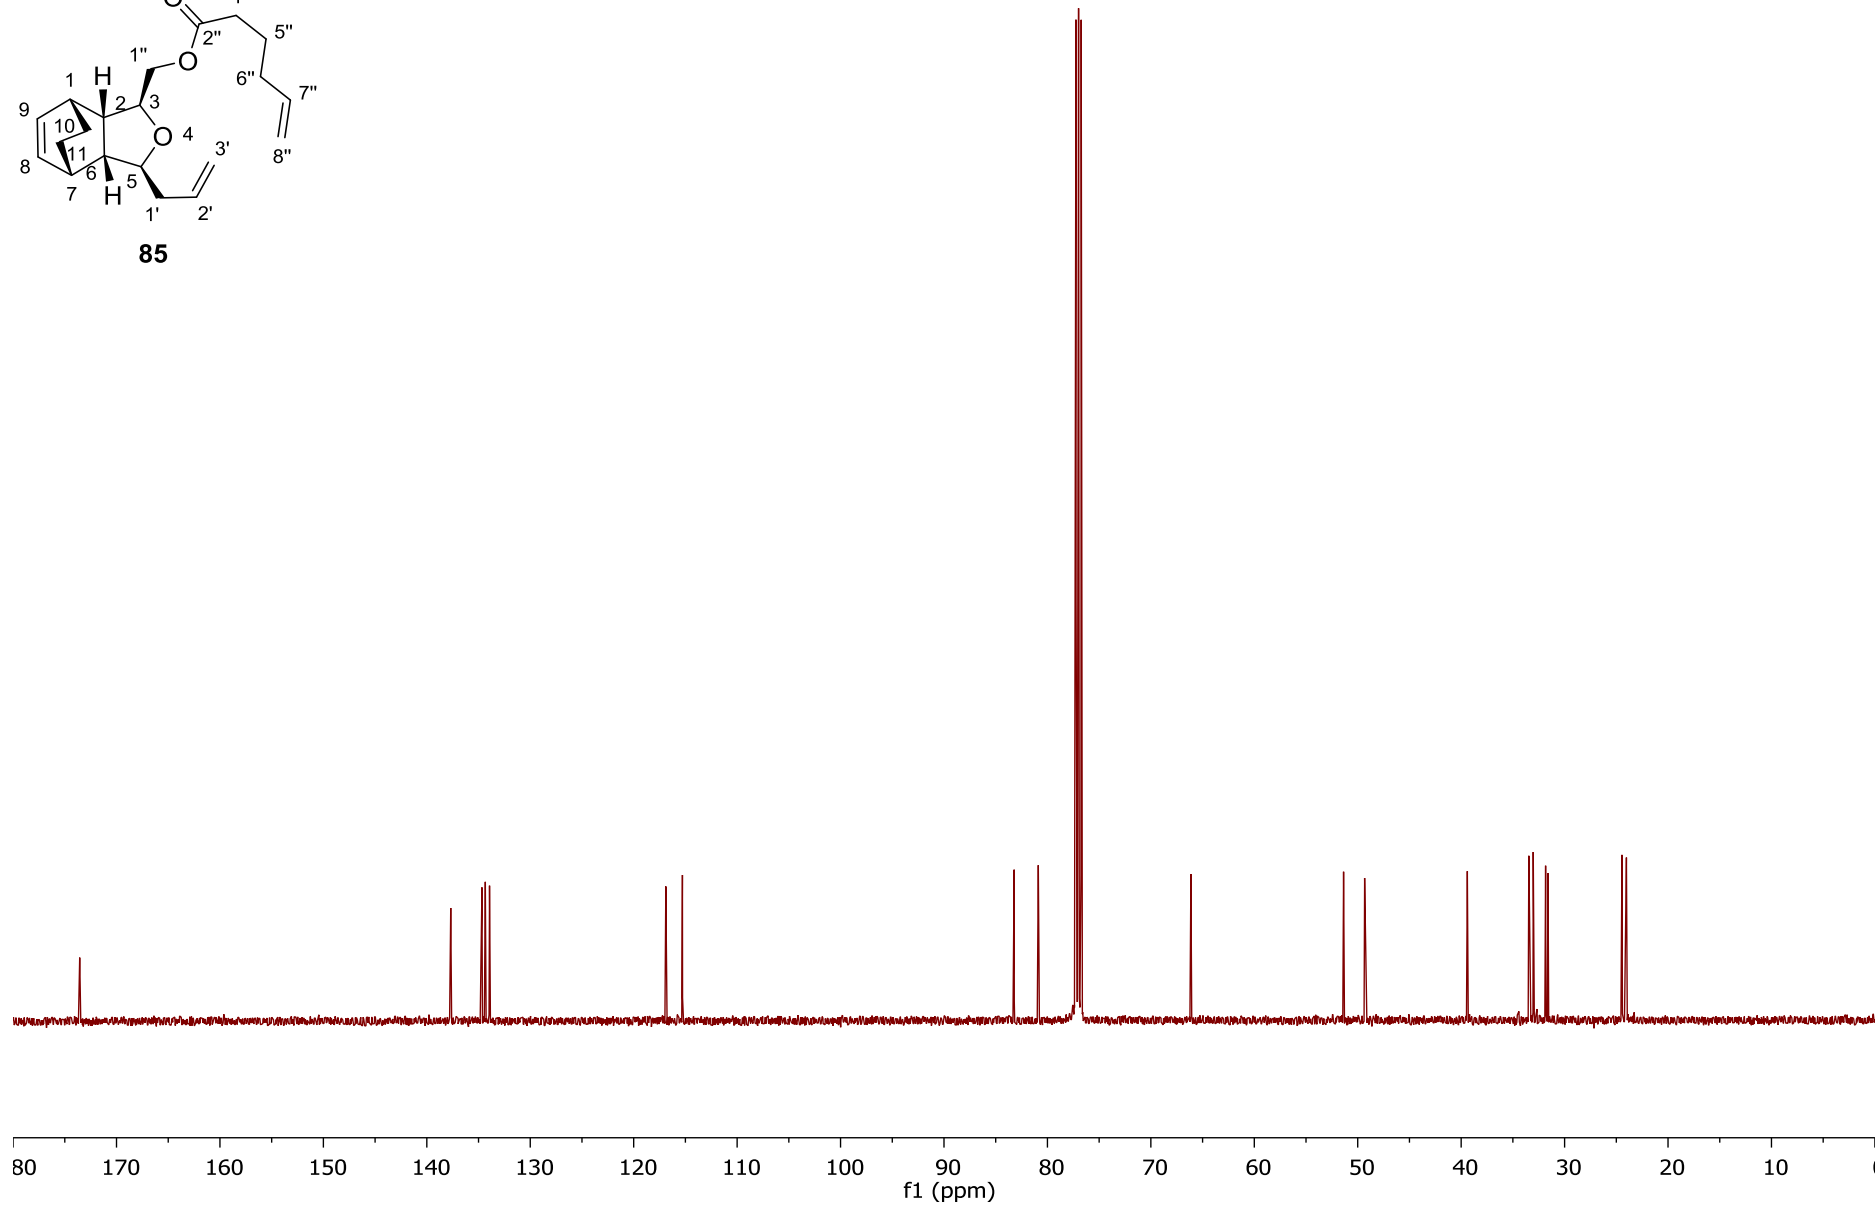



(1R,2S,3S,10E,13S,14R,15S)-5,20- dioxatetracyclo[13.2.2.1<sup>3,13</sup>.0<sup>2,14</sup>]icosa- 10,16-dien-6-one **40**

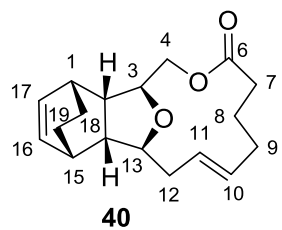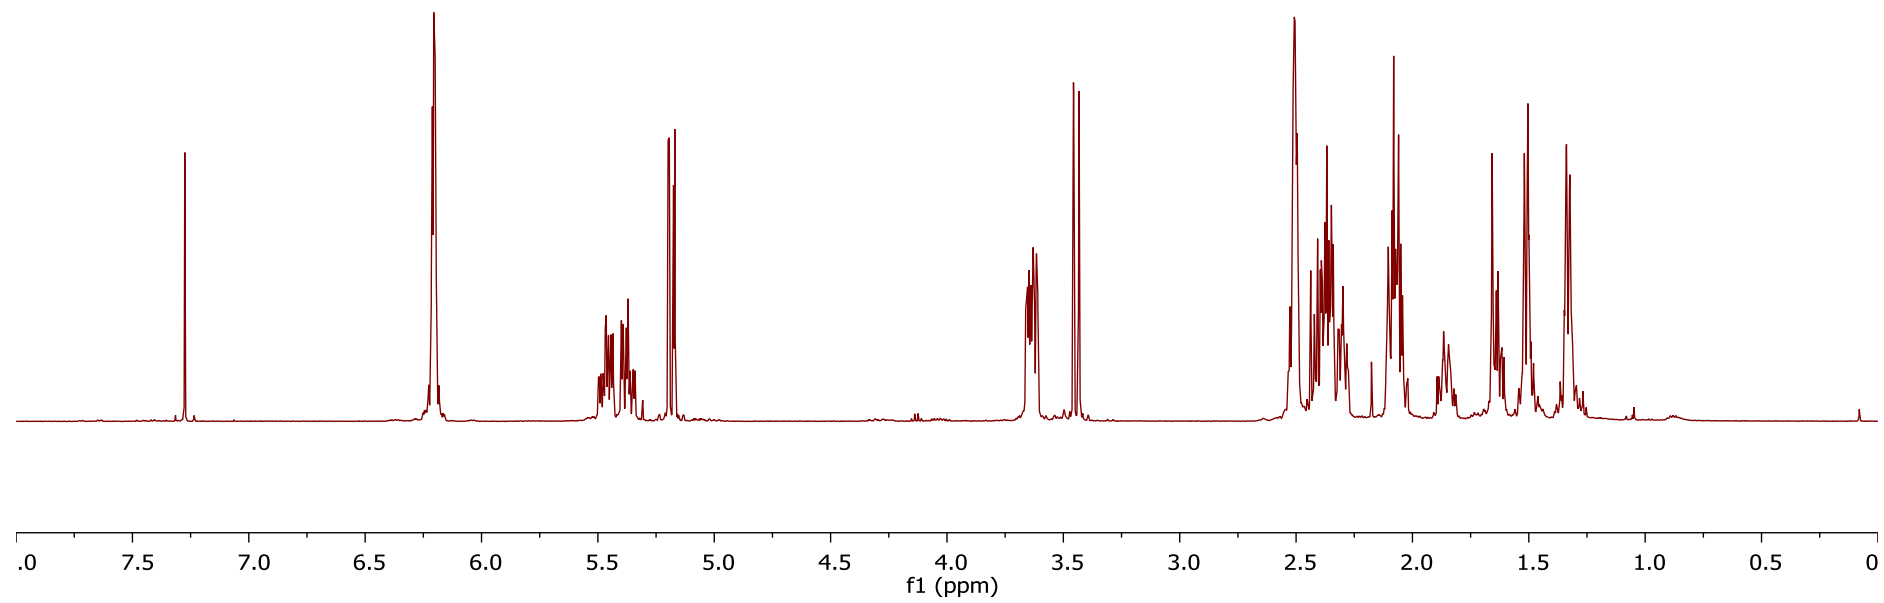

(1R,2S,3S,10E,13S,14R,15S)-5,20- dioxatetracyclo[13.2.2.1<sup>3,13</sup>.0<sup>2,14</sup>]icosa- 10,16-dien-6-one **40**

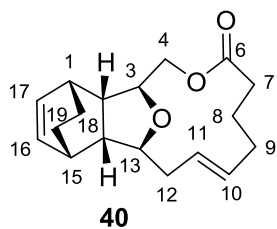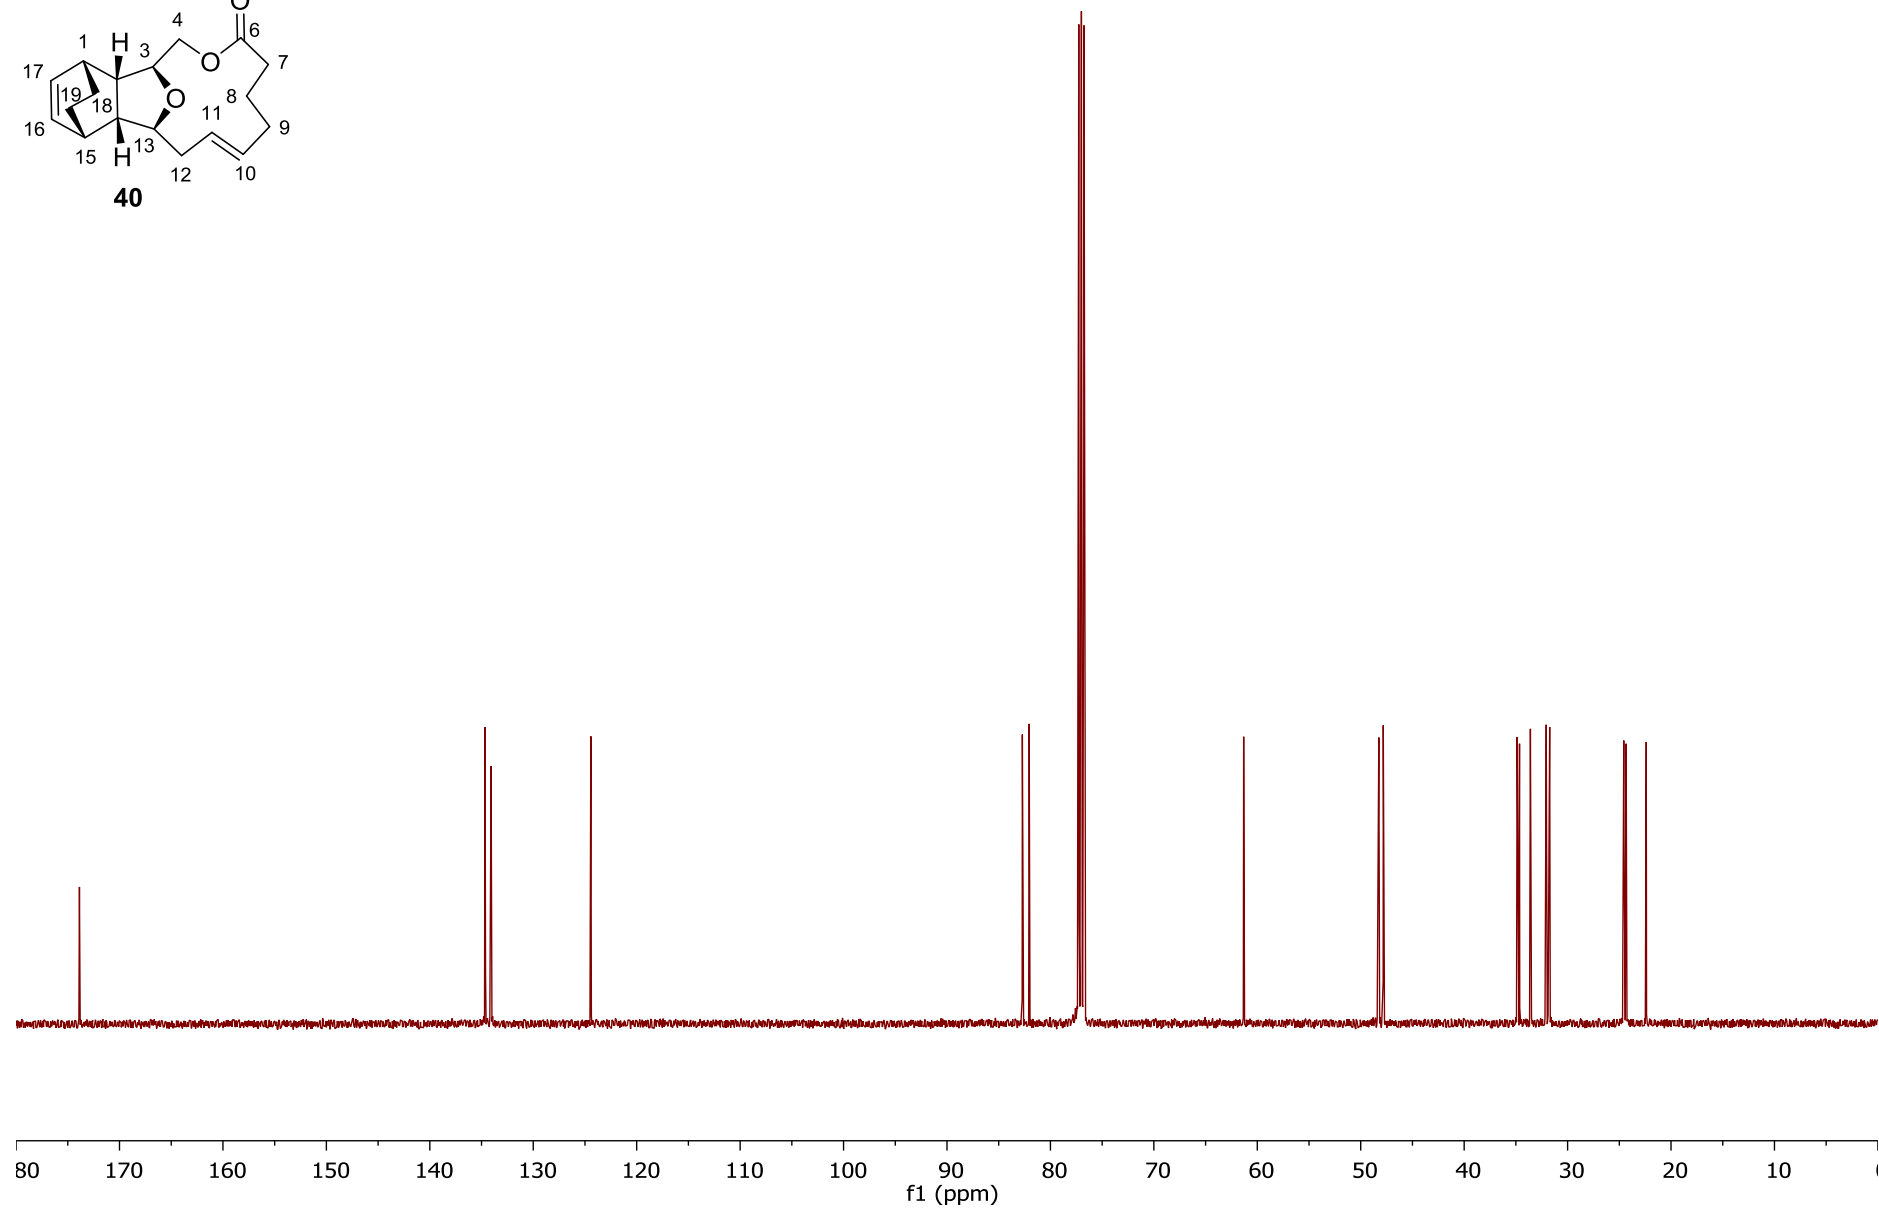

(3*S*,3*aS*,4*R*,7*S*,7*aR*)-3-(((*tert*-butyldiphenylsilyl)oxy)methyl)-3*a*,4,7,7*a*-tetrahydro-4,7-methanoisobenzofuran-1(3*H*)-one **41a**

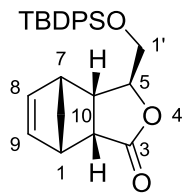

**41a**

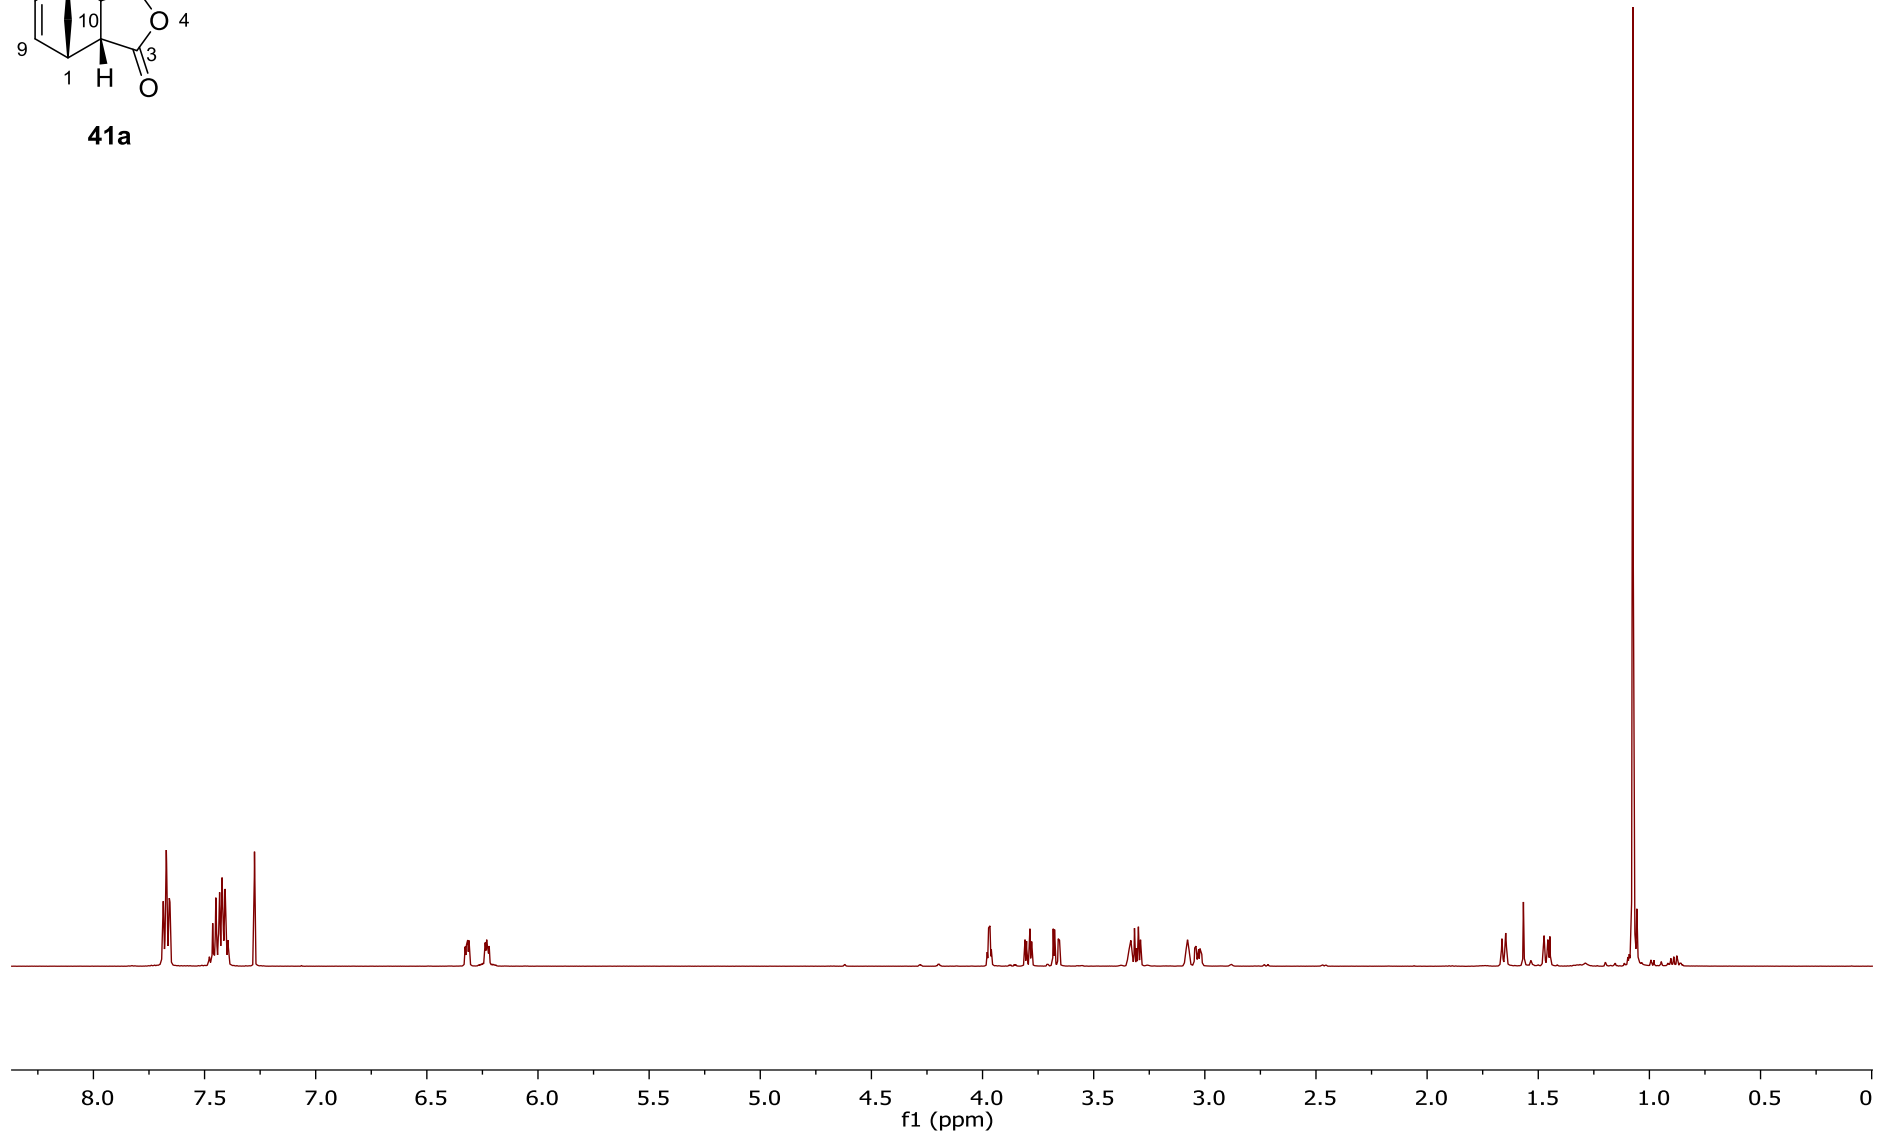

(3*S*,3*aS*,4*R*,7*S*,7*aR*)-3-(((*tert*-butyldiphenylsilyl)oxy)methyl)-3*a*,4,7,7*a*-tetrahydro-4,7-methanoisobenzofuran-1(3*H*)-one **41a**

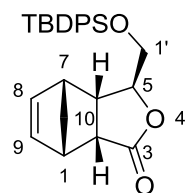

**41a**

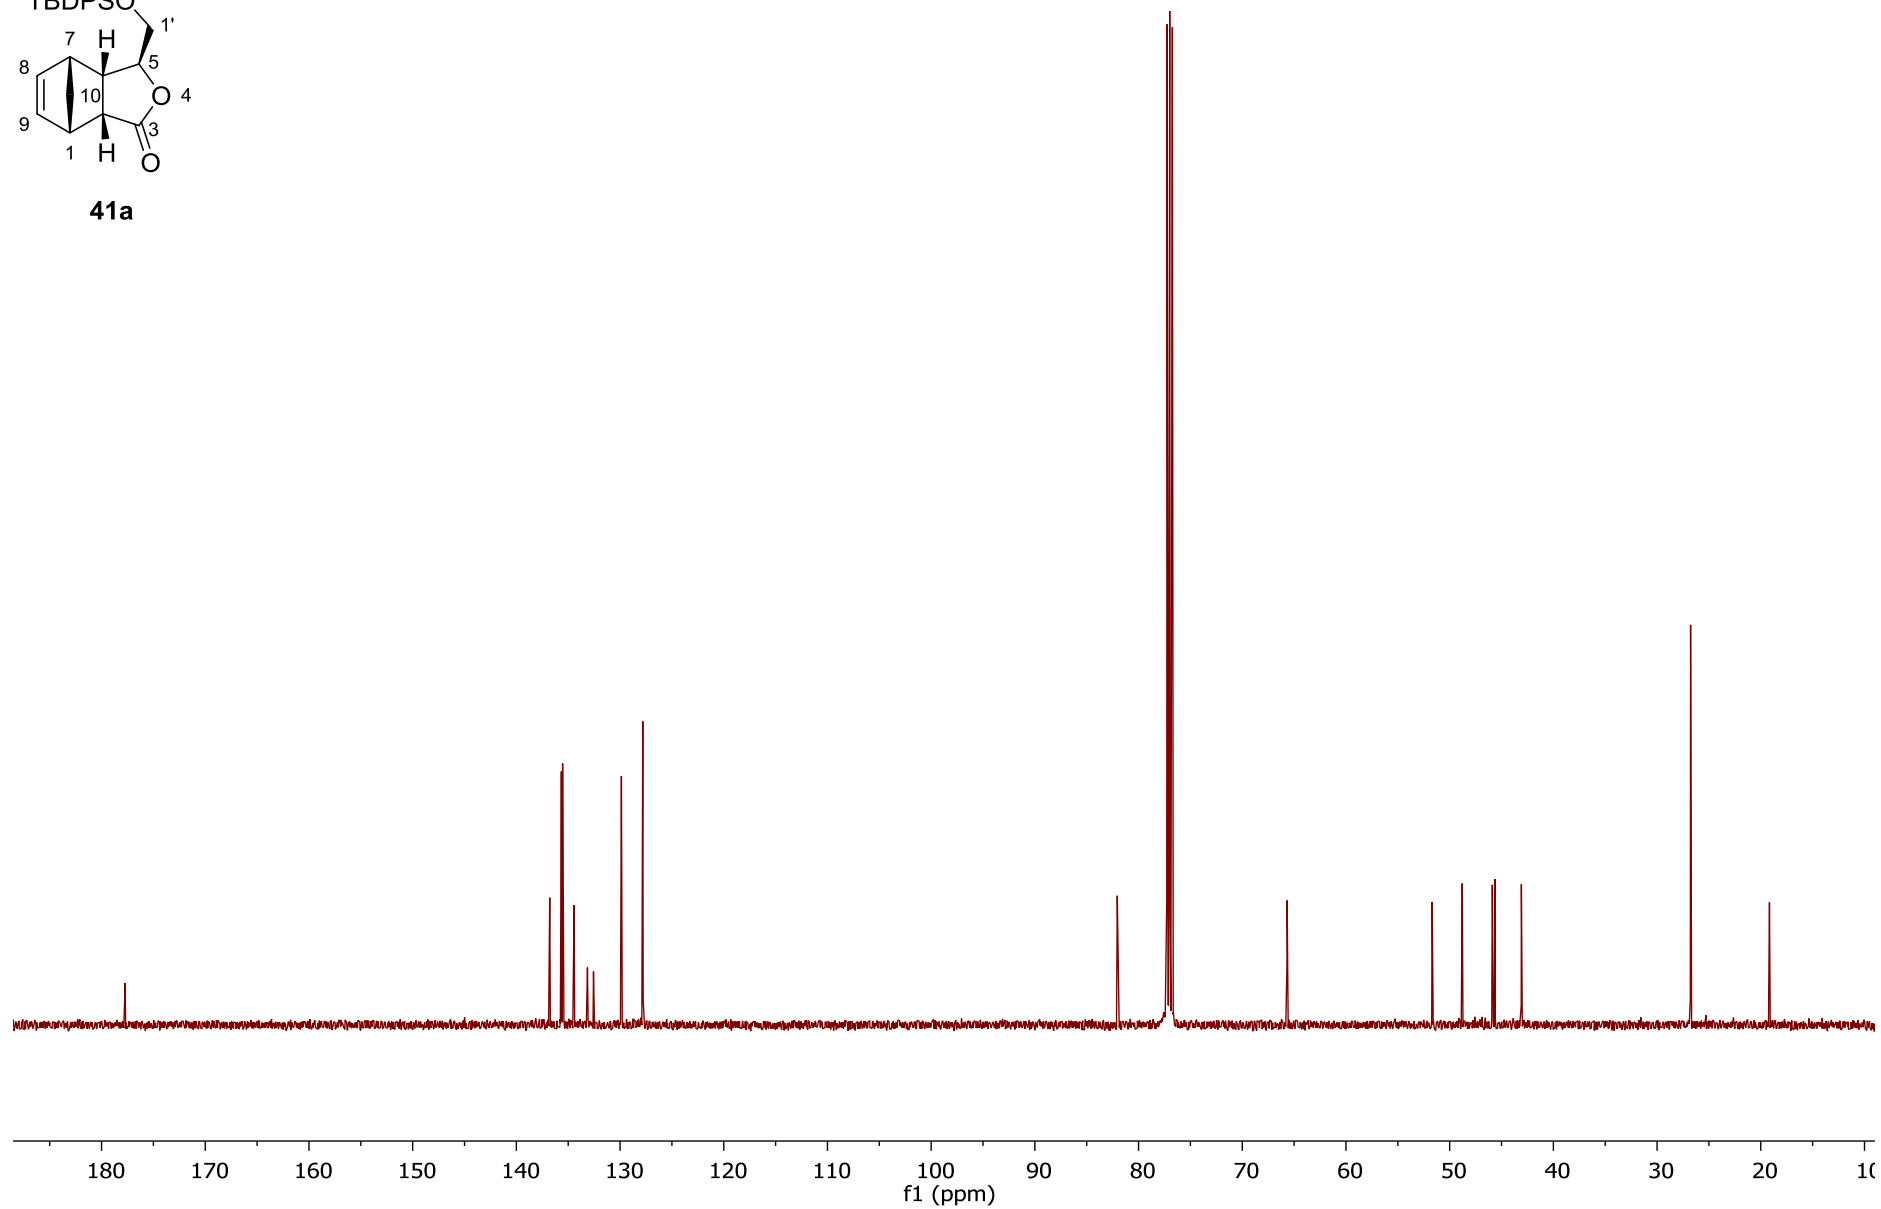

(1*S*,2*R*,5*S*,6*S*,7*R*)-5-(*tert*-Butyldiphenylsilanoxymethyl)-4-oxa-tricyclo[5.2.1.0.<sup>2,6</sup>]decan-3-one **41b**

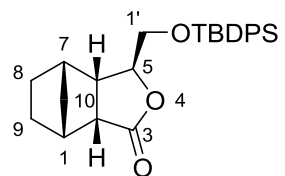

**41b**

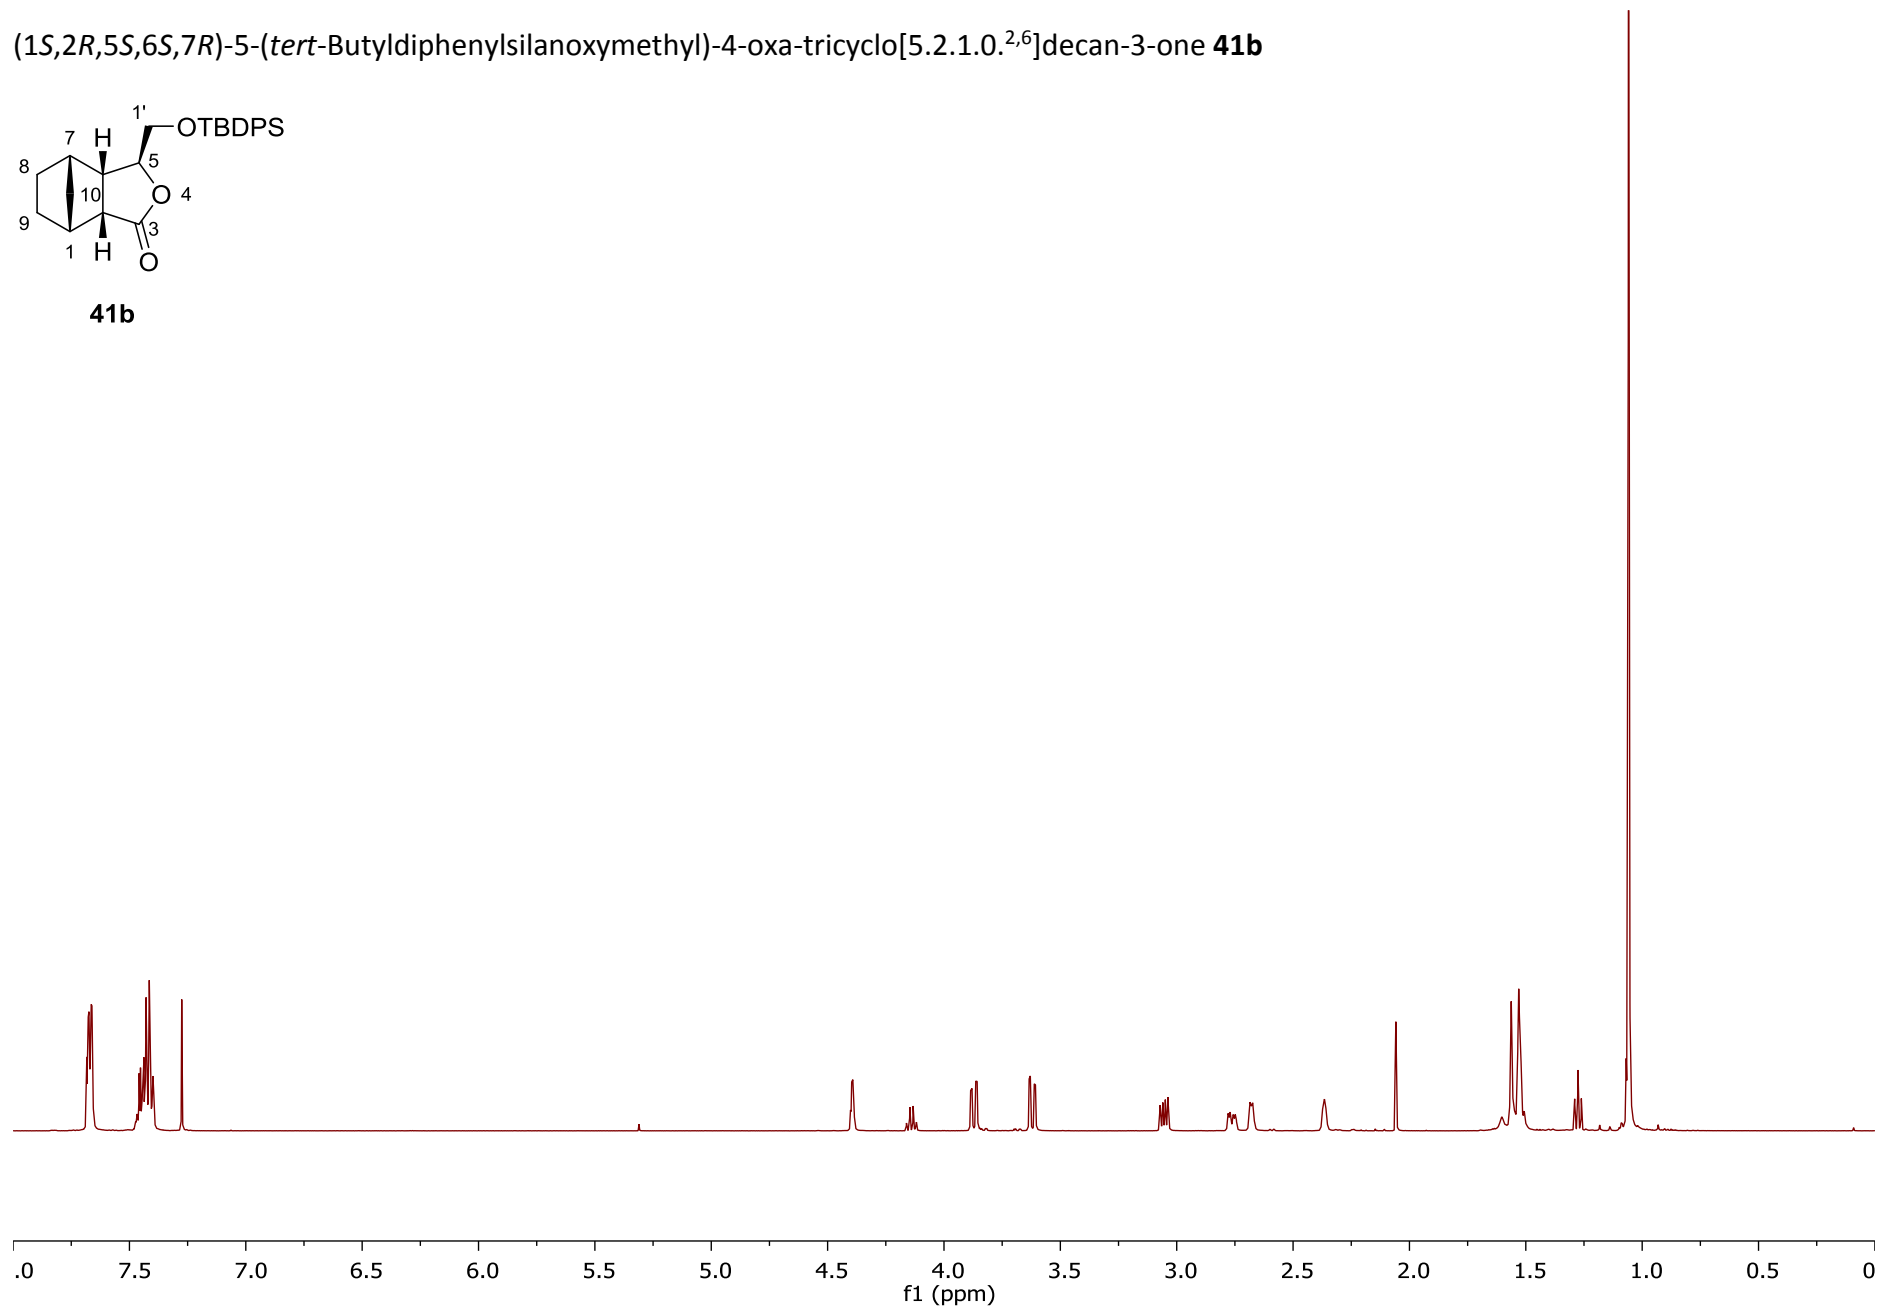

(1*S*,2*R*,5*S*,6*S*,7*R*)-5-(*tert*-Butyldiphenylsilanoxymethyl)-4-oxa-tricyclo[5.2.1.0.<sup>2,6</sup>]decan-3-one **41b**



**41b**

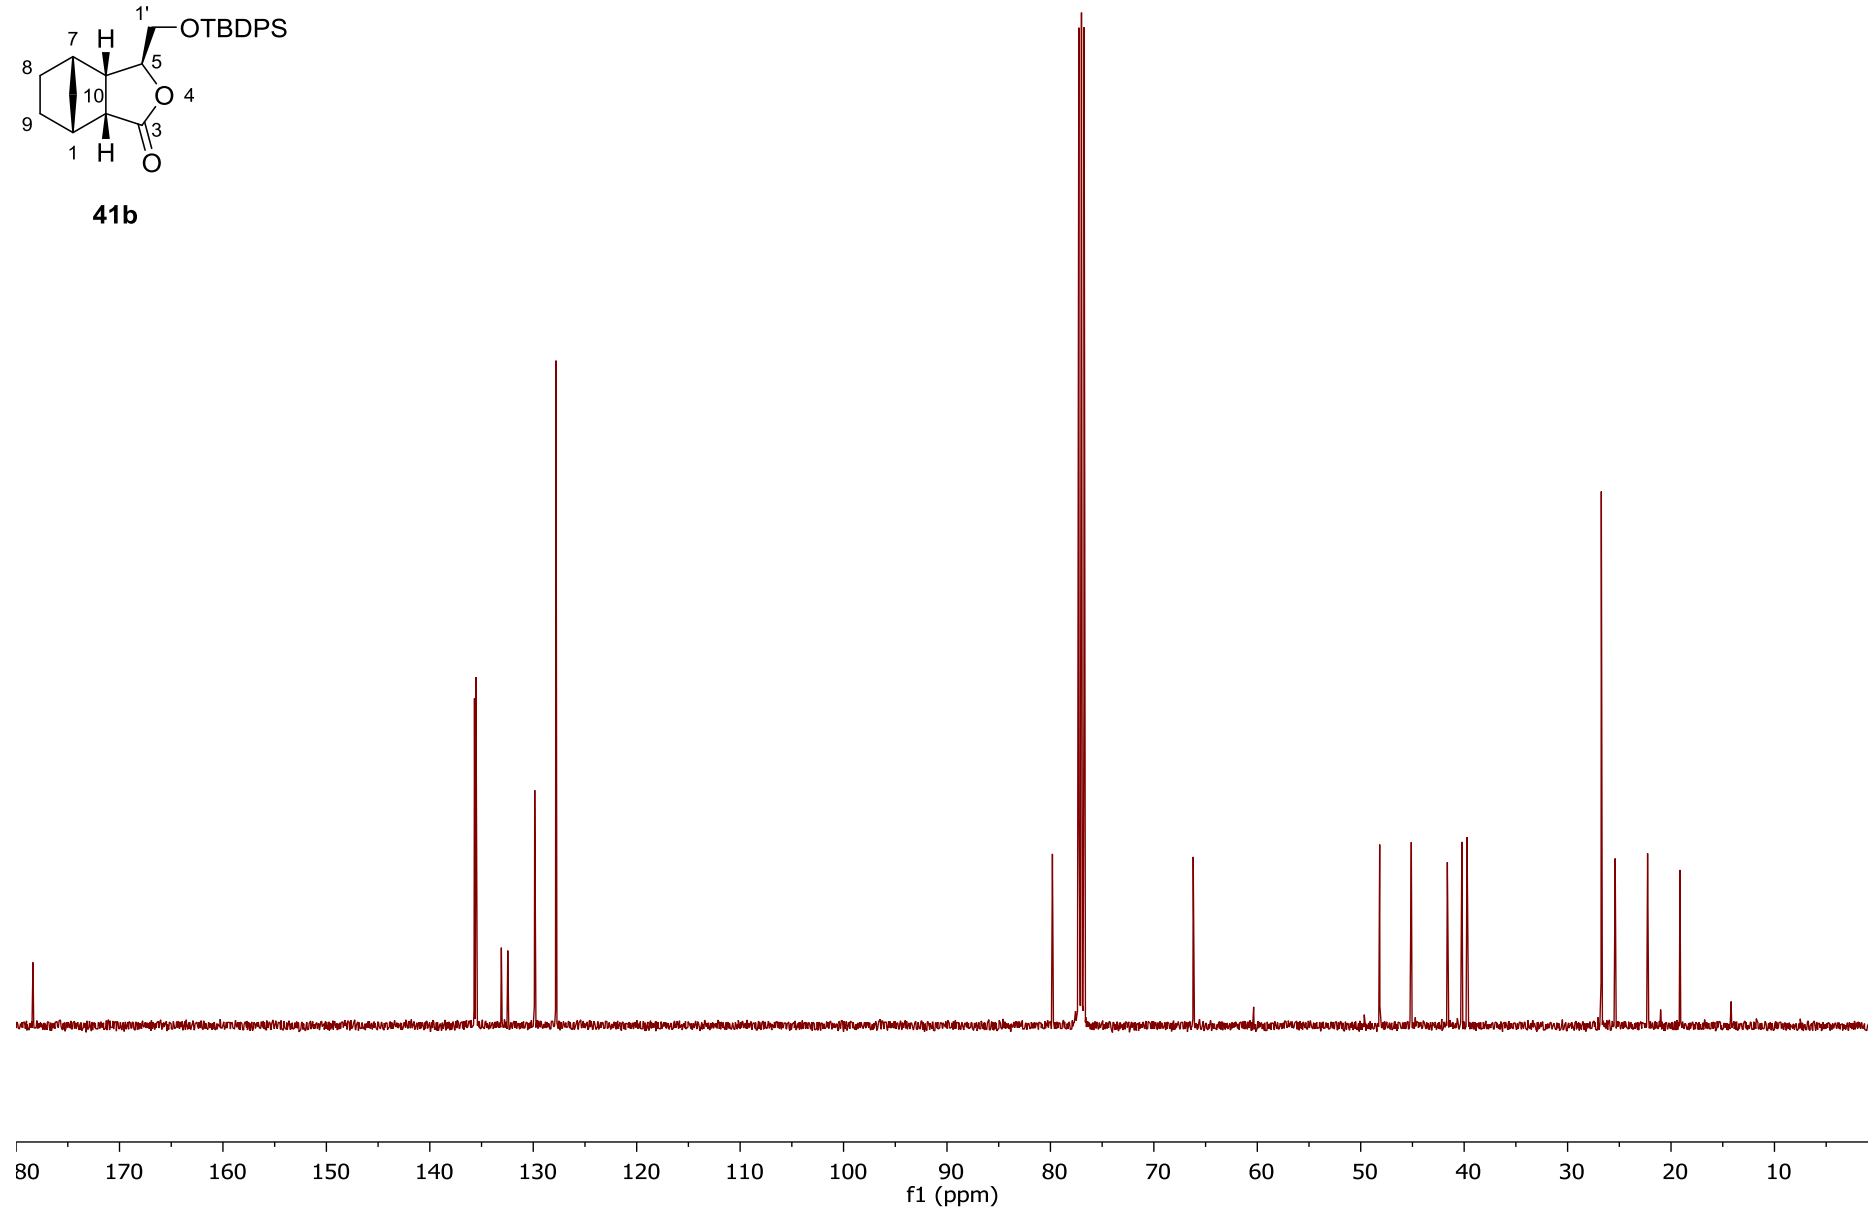

(1*S*,2*R*,5*S*,6*S*,7*R*)-5-(*tert*-Butyldiphenylsilanoxymethyl)-4-oxa-tricyclo[5.2.1.0.<sup>2,6</sup>]decan-3-ol **41c**

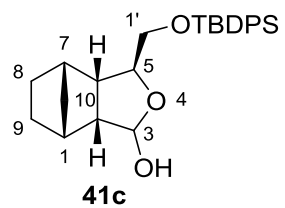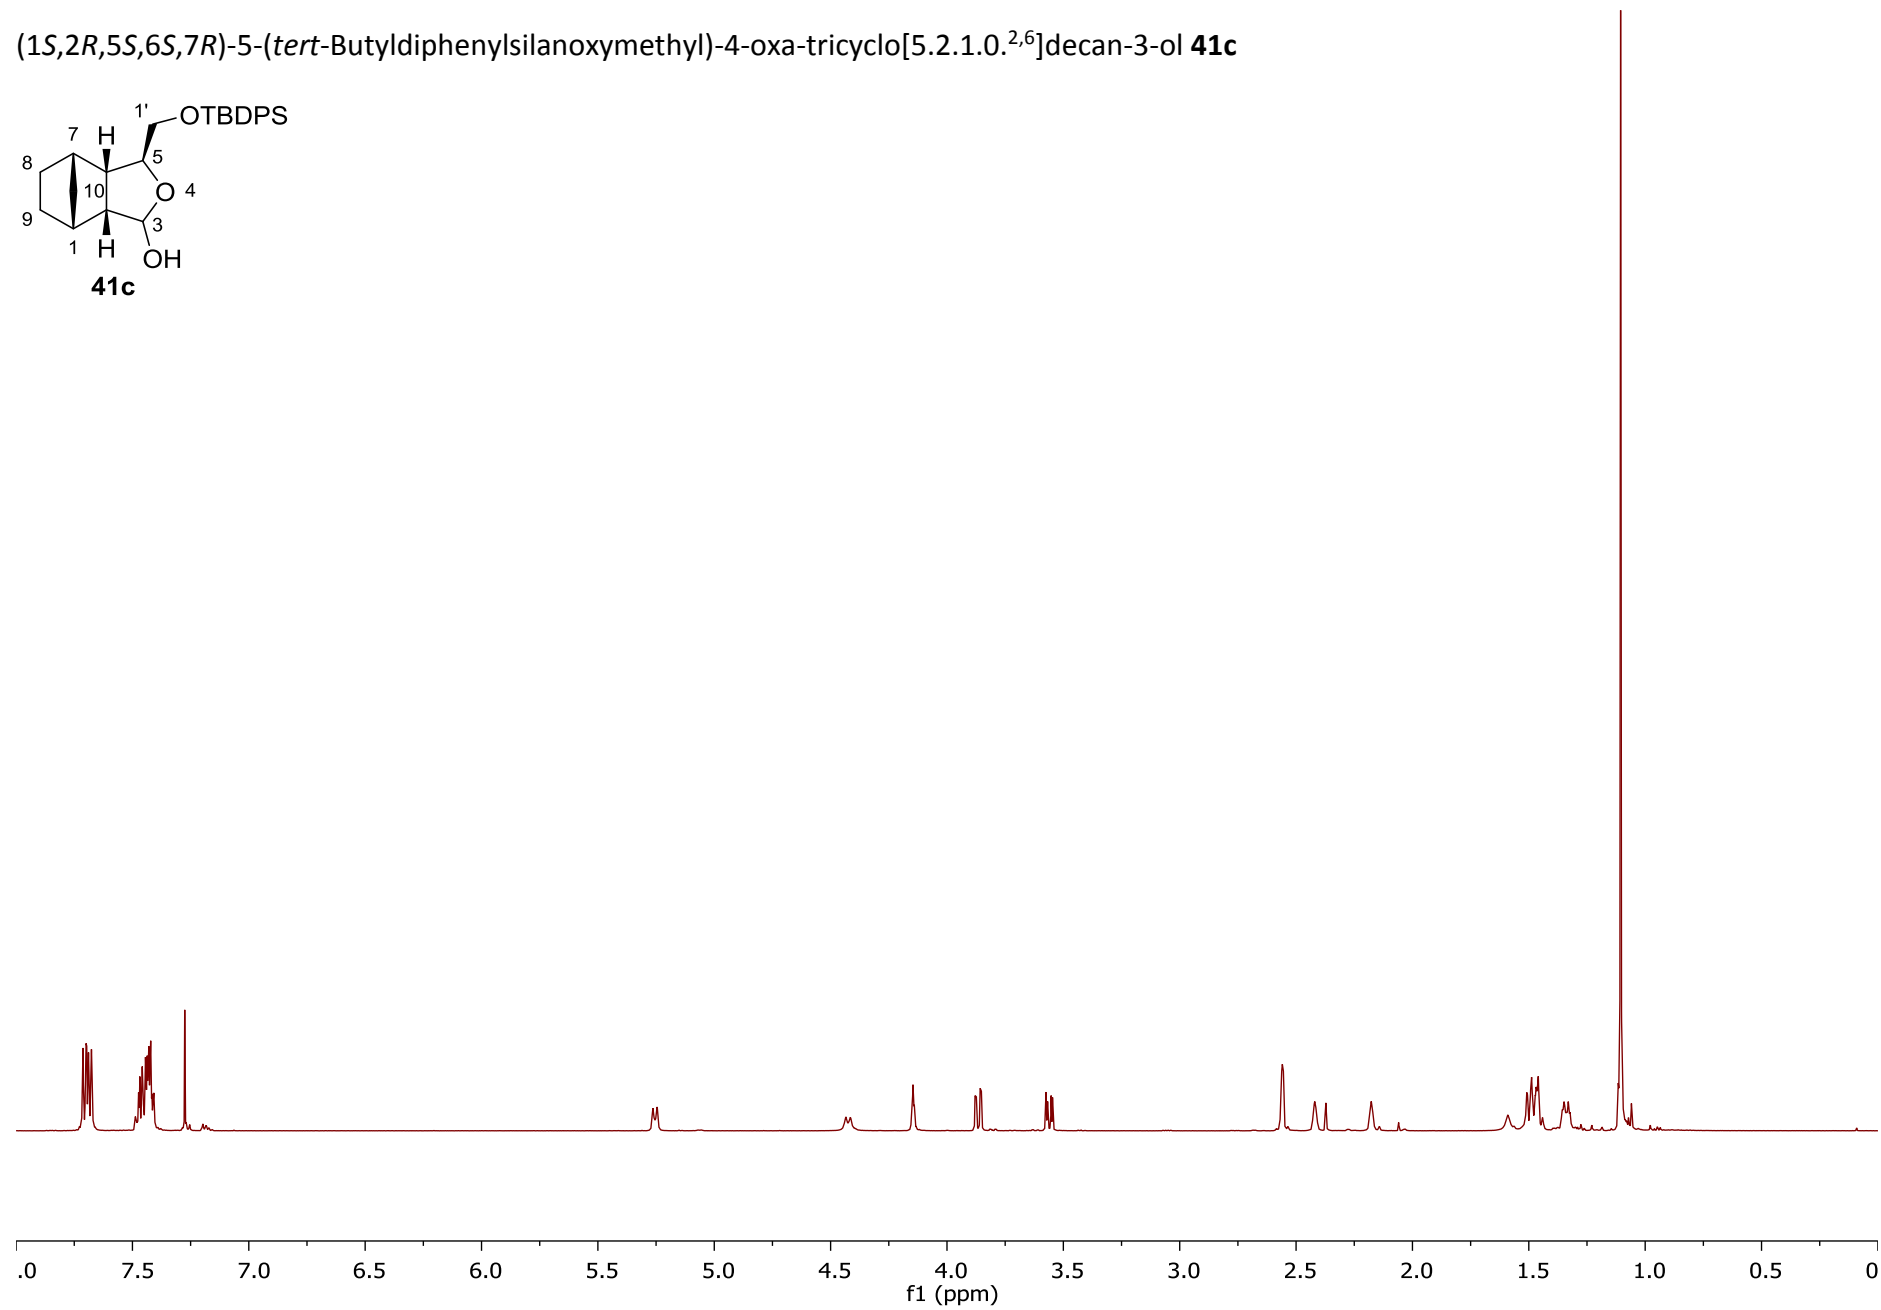

(1*S*,2*R*,5*S*,6*S*,7*R*)-5-(*tert*-Butyldiphenylsilanoxymethyl)-4-oxa-tricyclo[5.2.1.0.<sup>2,6</sup>]decan-3-ol **41c**

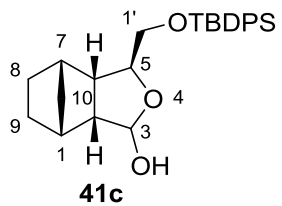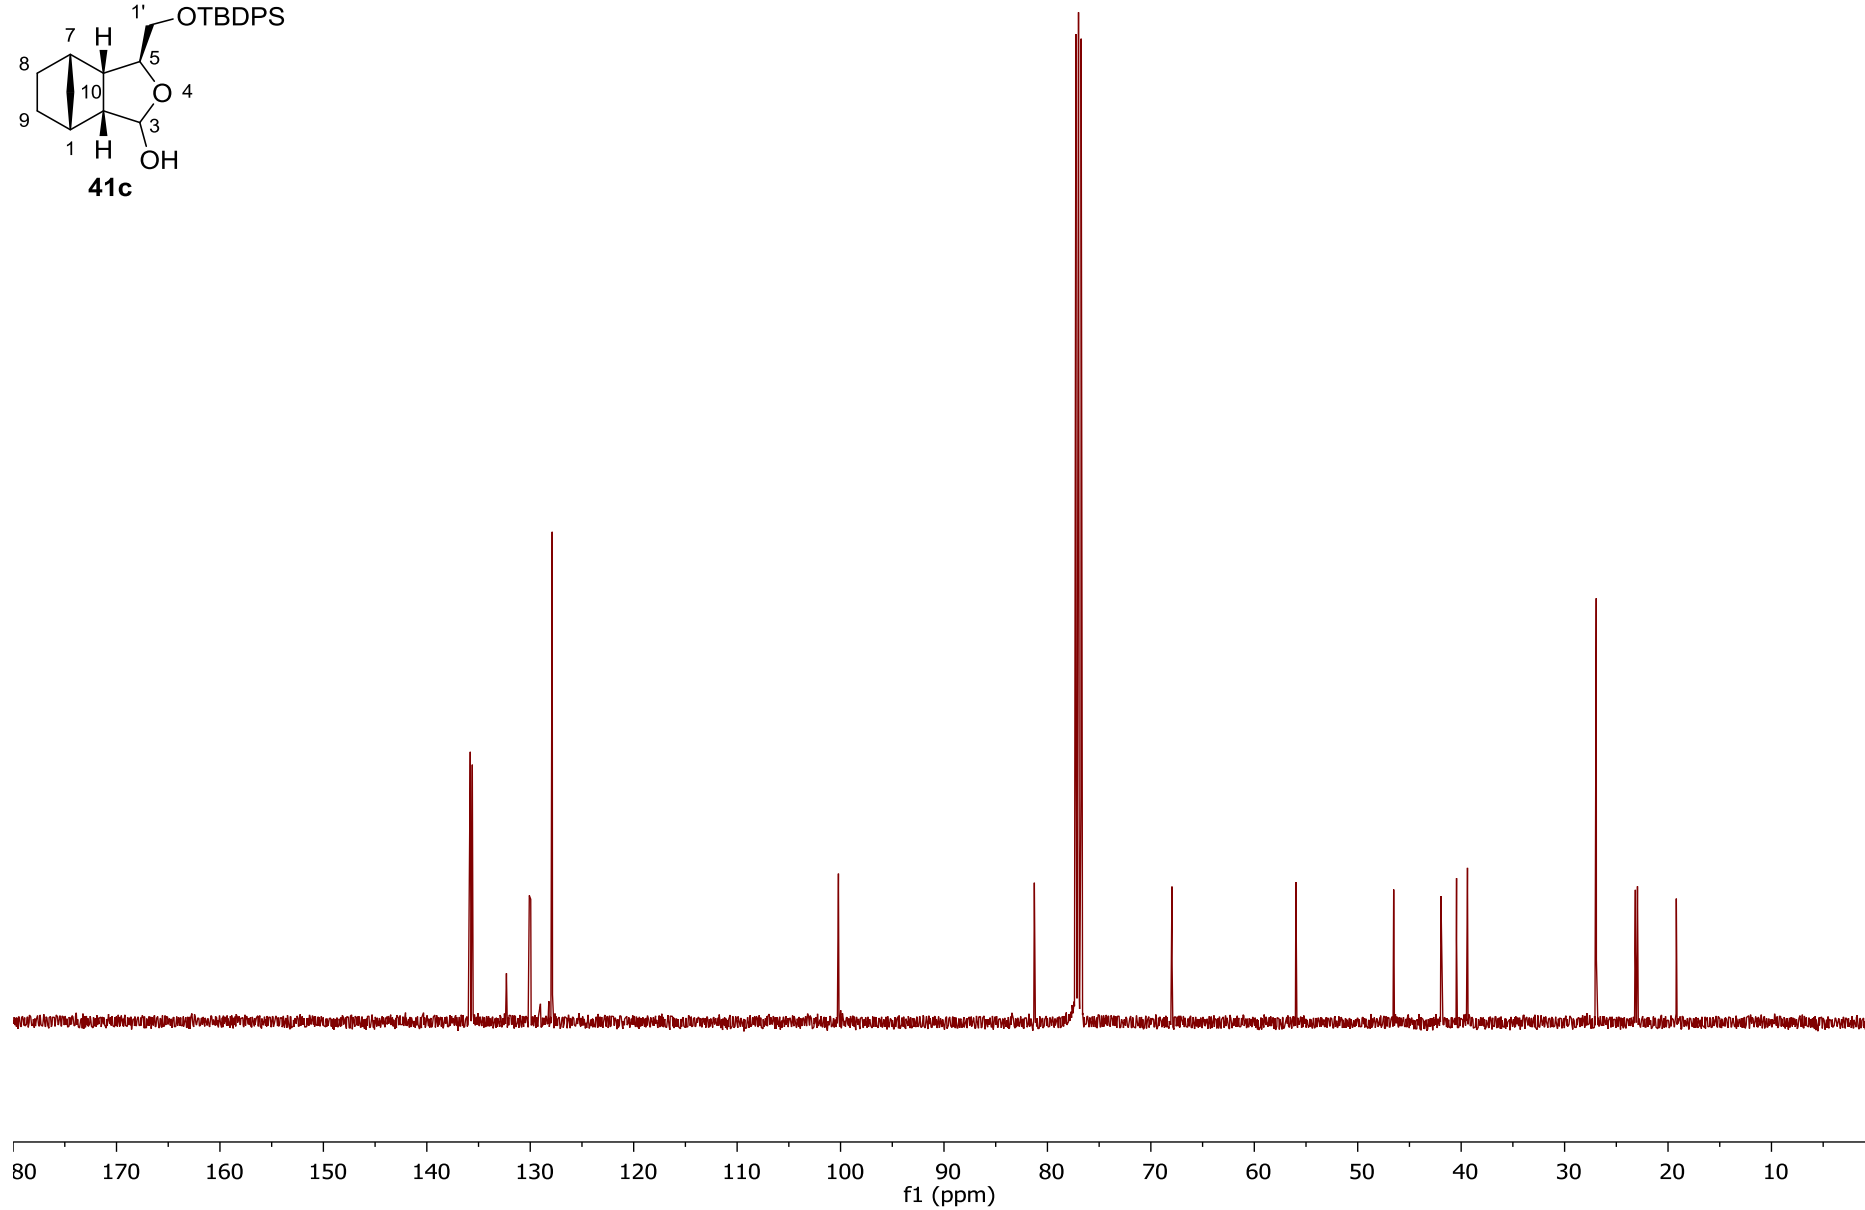



((1*R*,2*S*,3*S*,5*S*,6*R*,7*S*)-5-Allyl-4-oxa-tricyclo[5.2.1.0<sup>2,6</sup>]decane-3-ylmethoxy-*tert*-butyldiphenylsilane **41d**

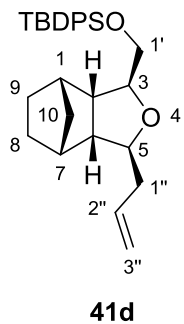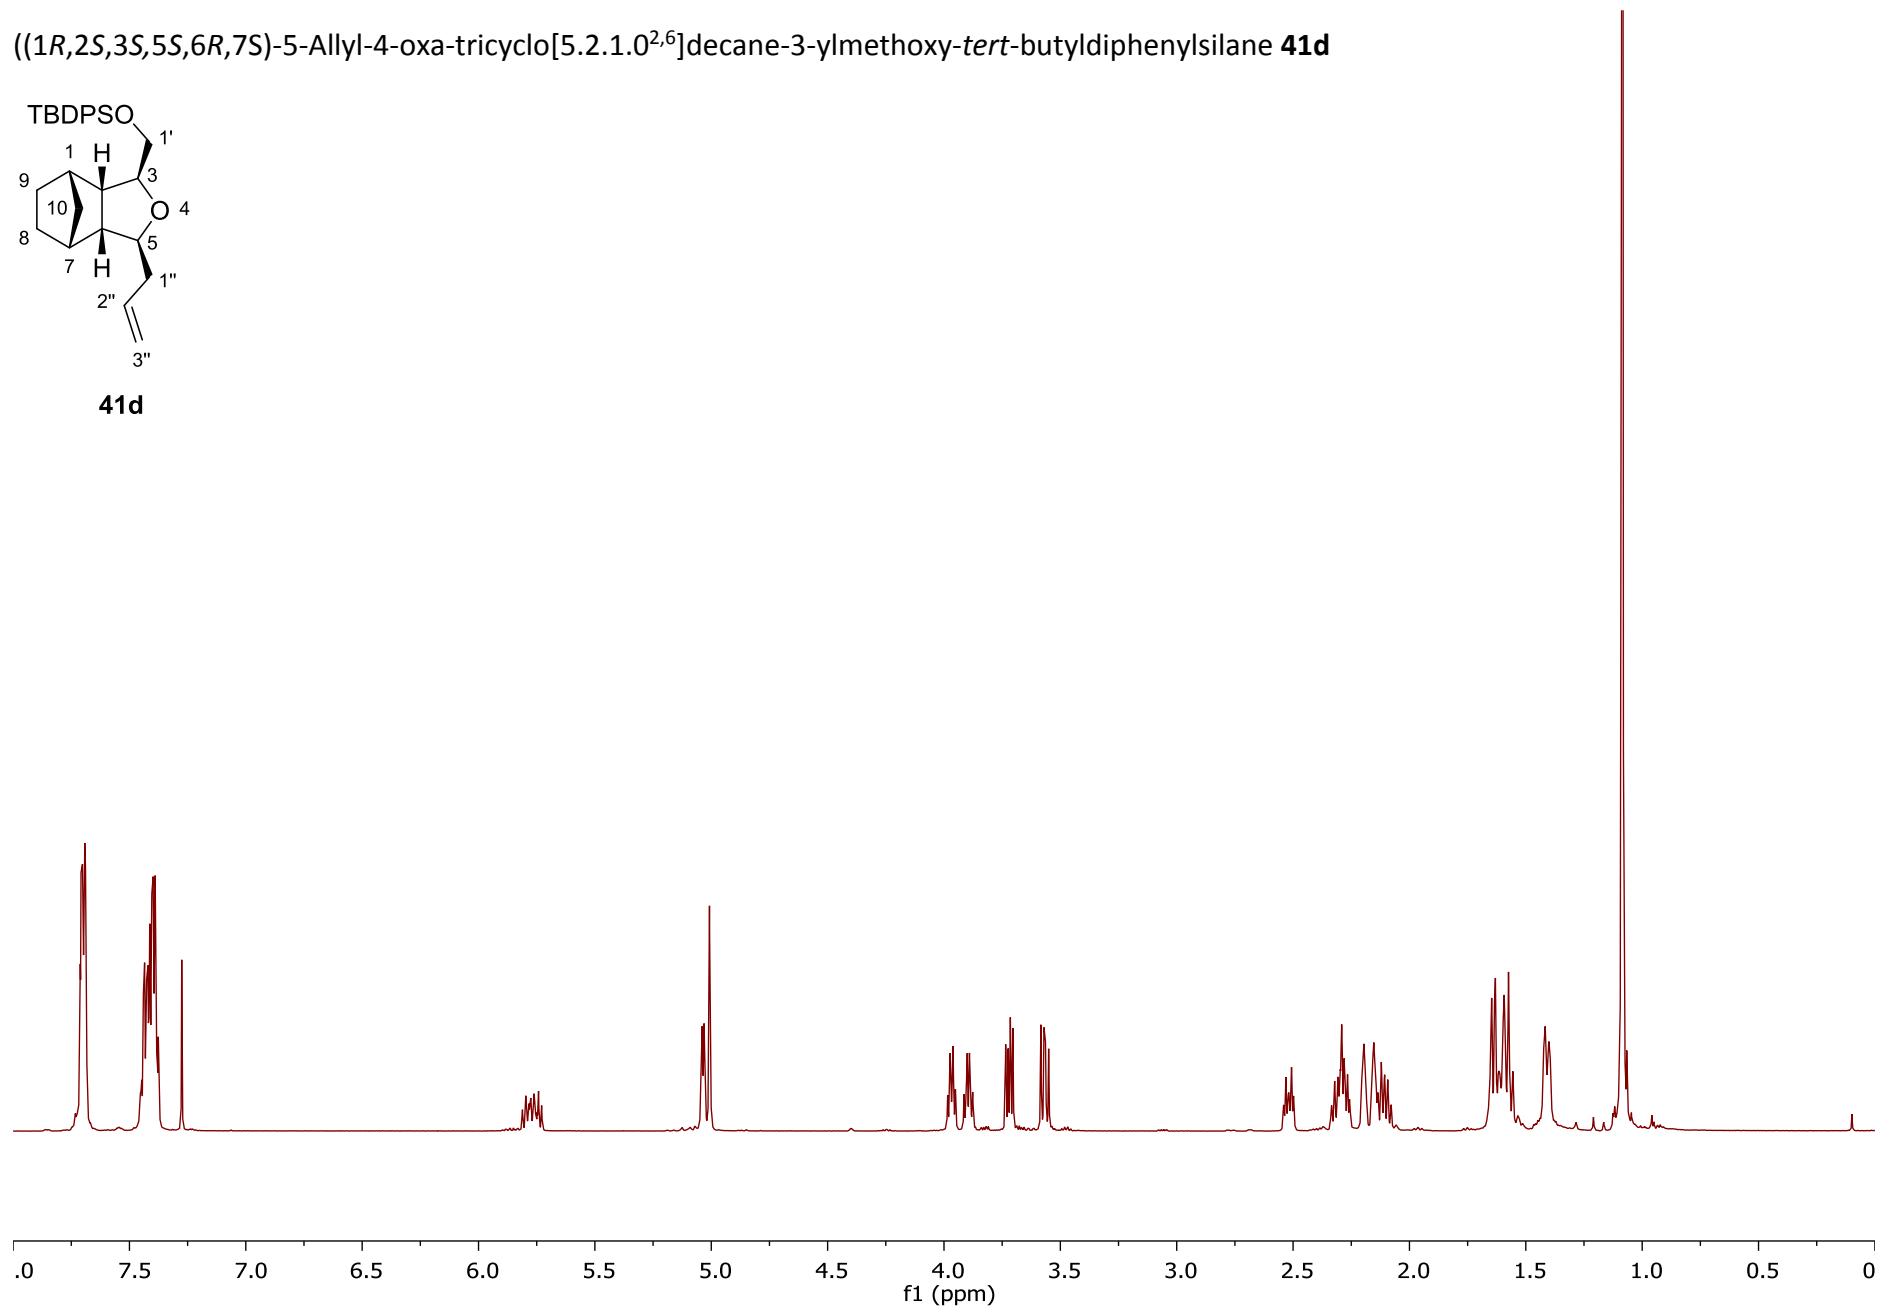

((1*R*,2*S*,3*S*,5*S*,6*R*,7*S*)-5-Allyl-4-oxa-tricyclo[5.2.1.0<sup>2,6</sup>]decane-3-ylmethoxy-*tert*-butyldiphenylsilane **41d**

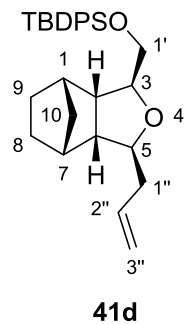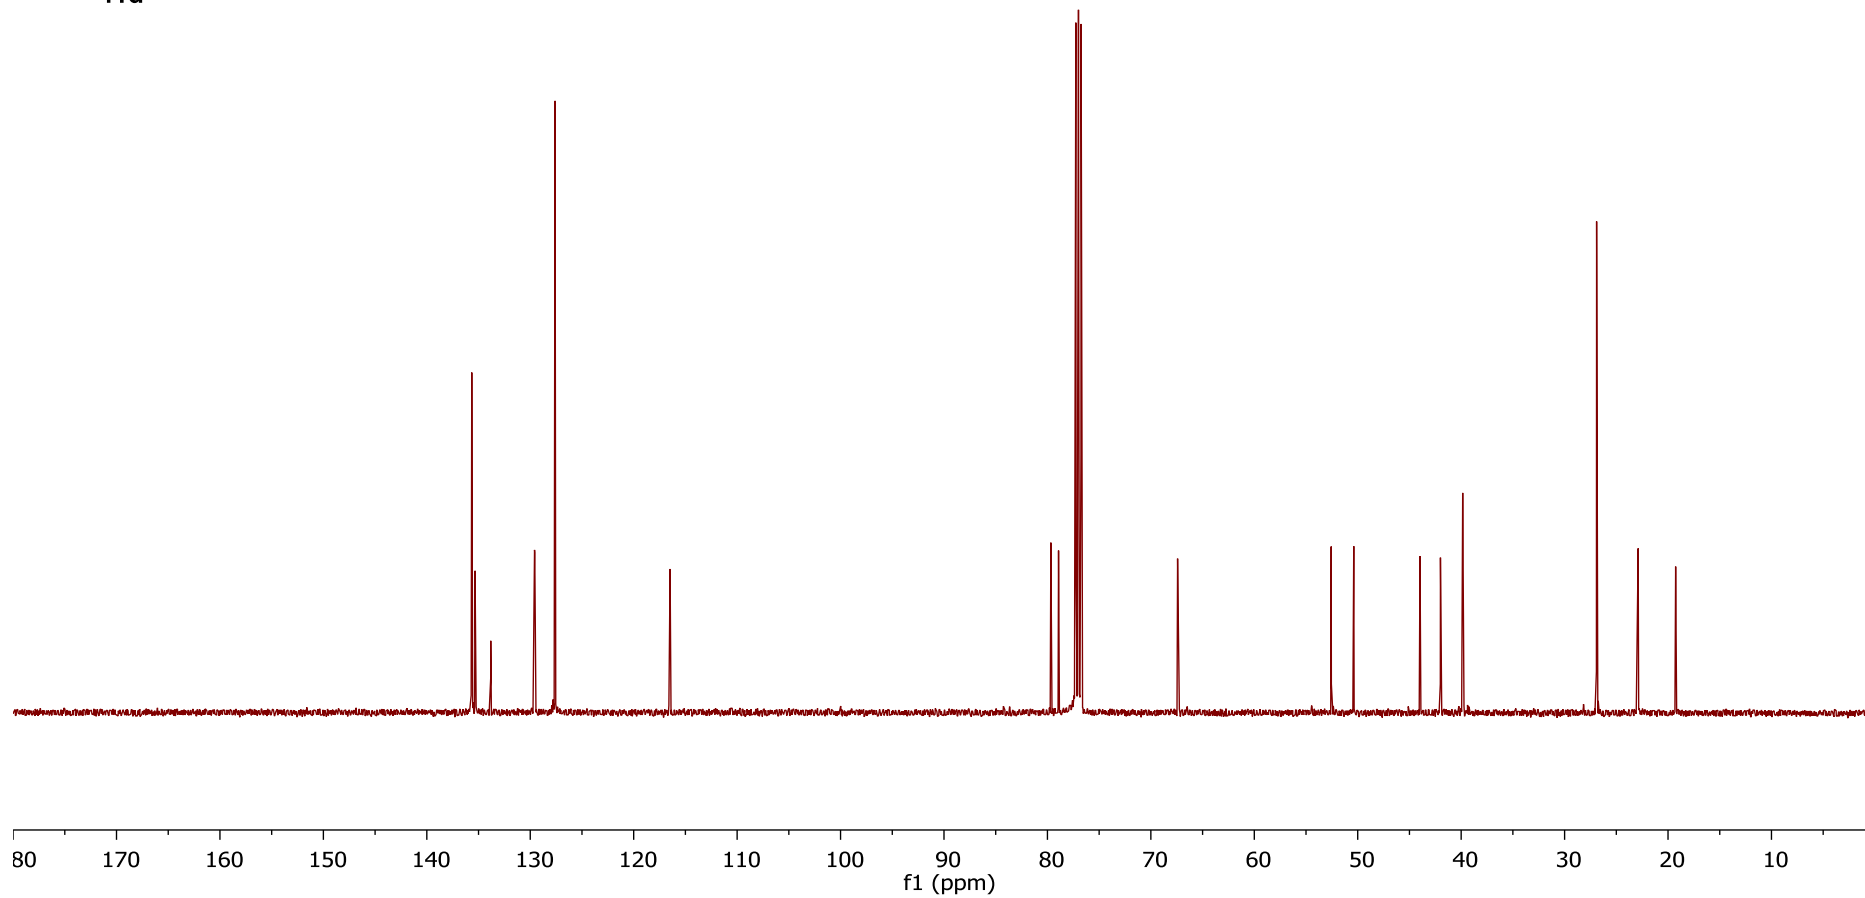

((1R,2S,3S,5S,6R,7S)-5-Allyl-4-oxa-tricyclo[5.2.1.0<sup>2,6</sup>]decan-3-yl)-methanol **41e**

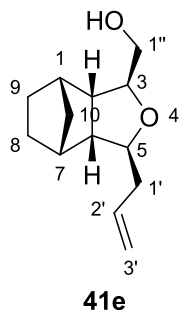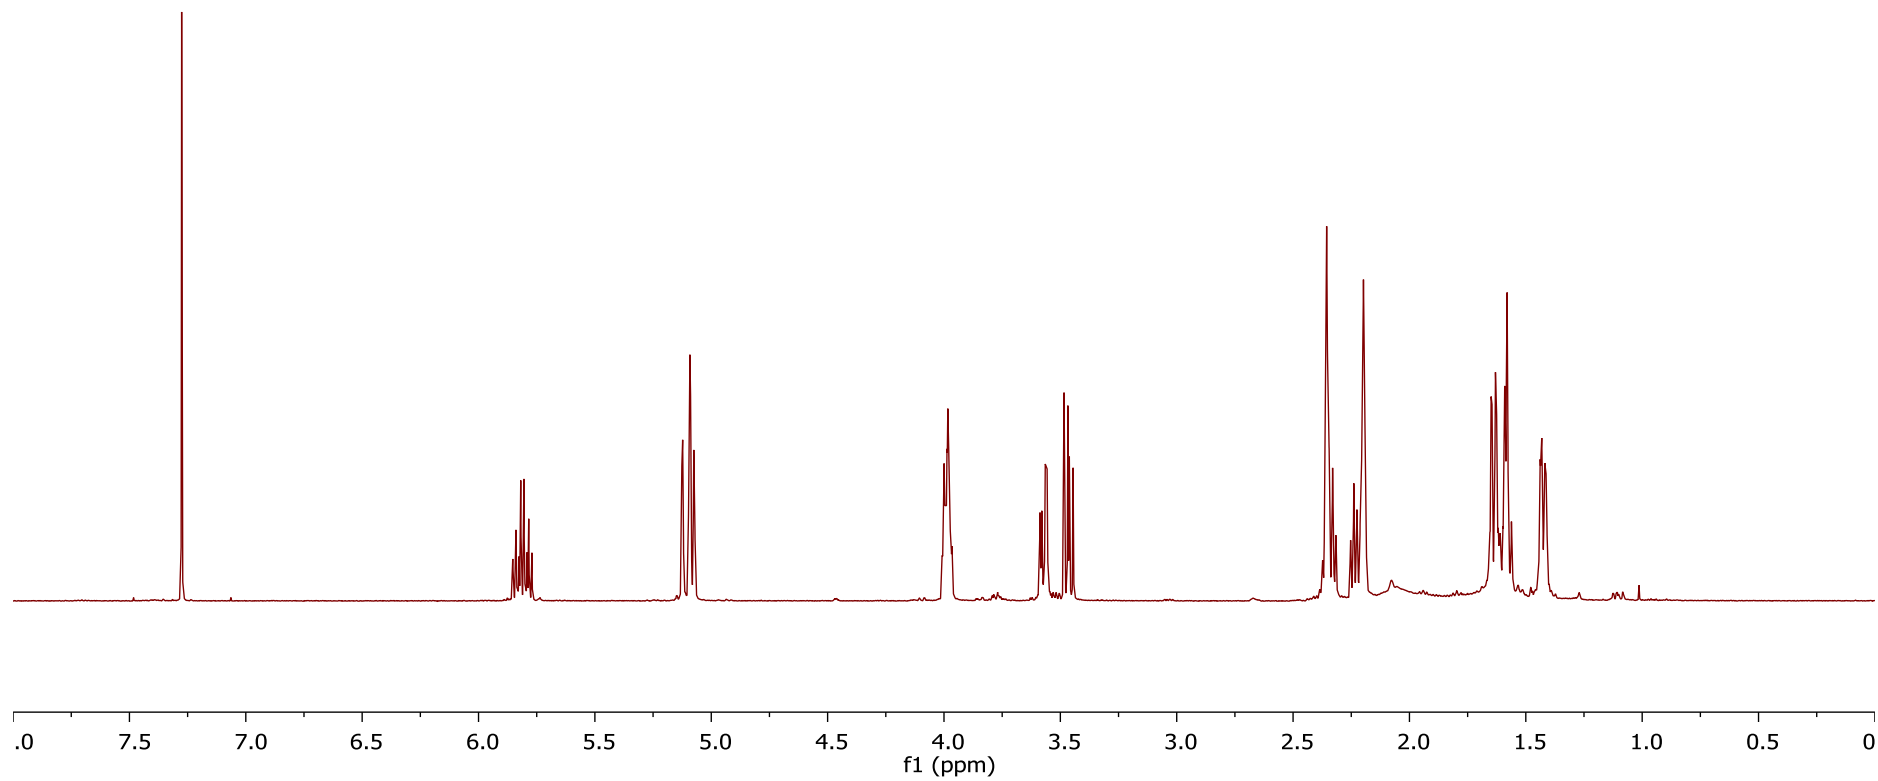

((1R,2S,3S,5S,6R,7S)-5-Allyl-4-oxa-tricyclo[5.2.1.0<sup>2,6</sup>]decan-3-yl)-methanol **41e**

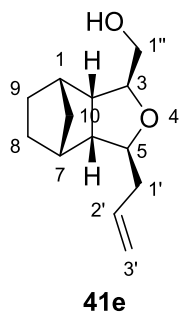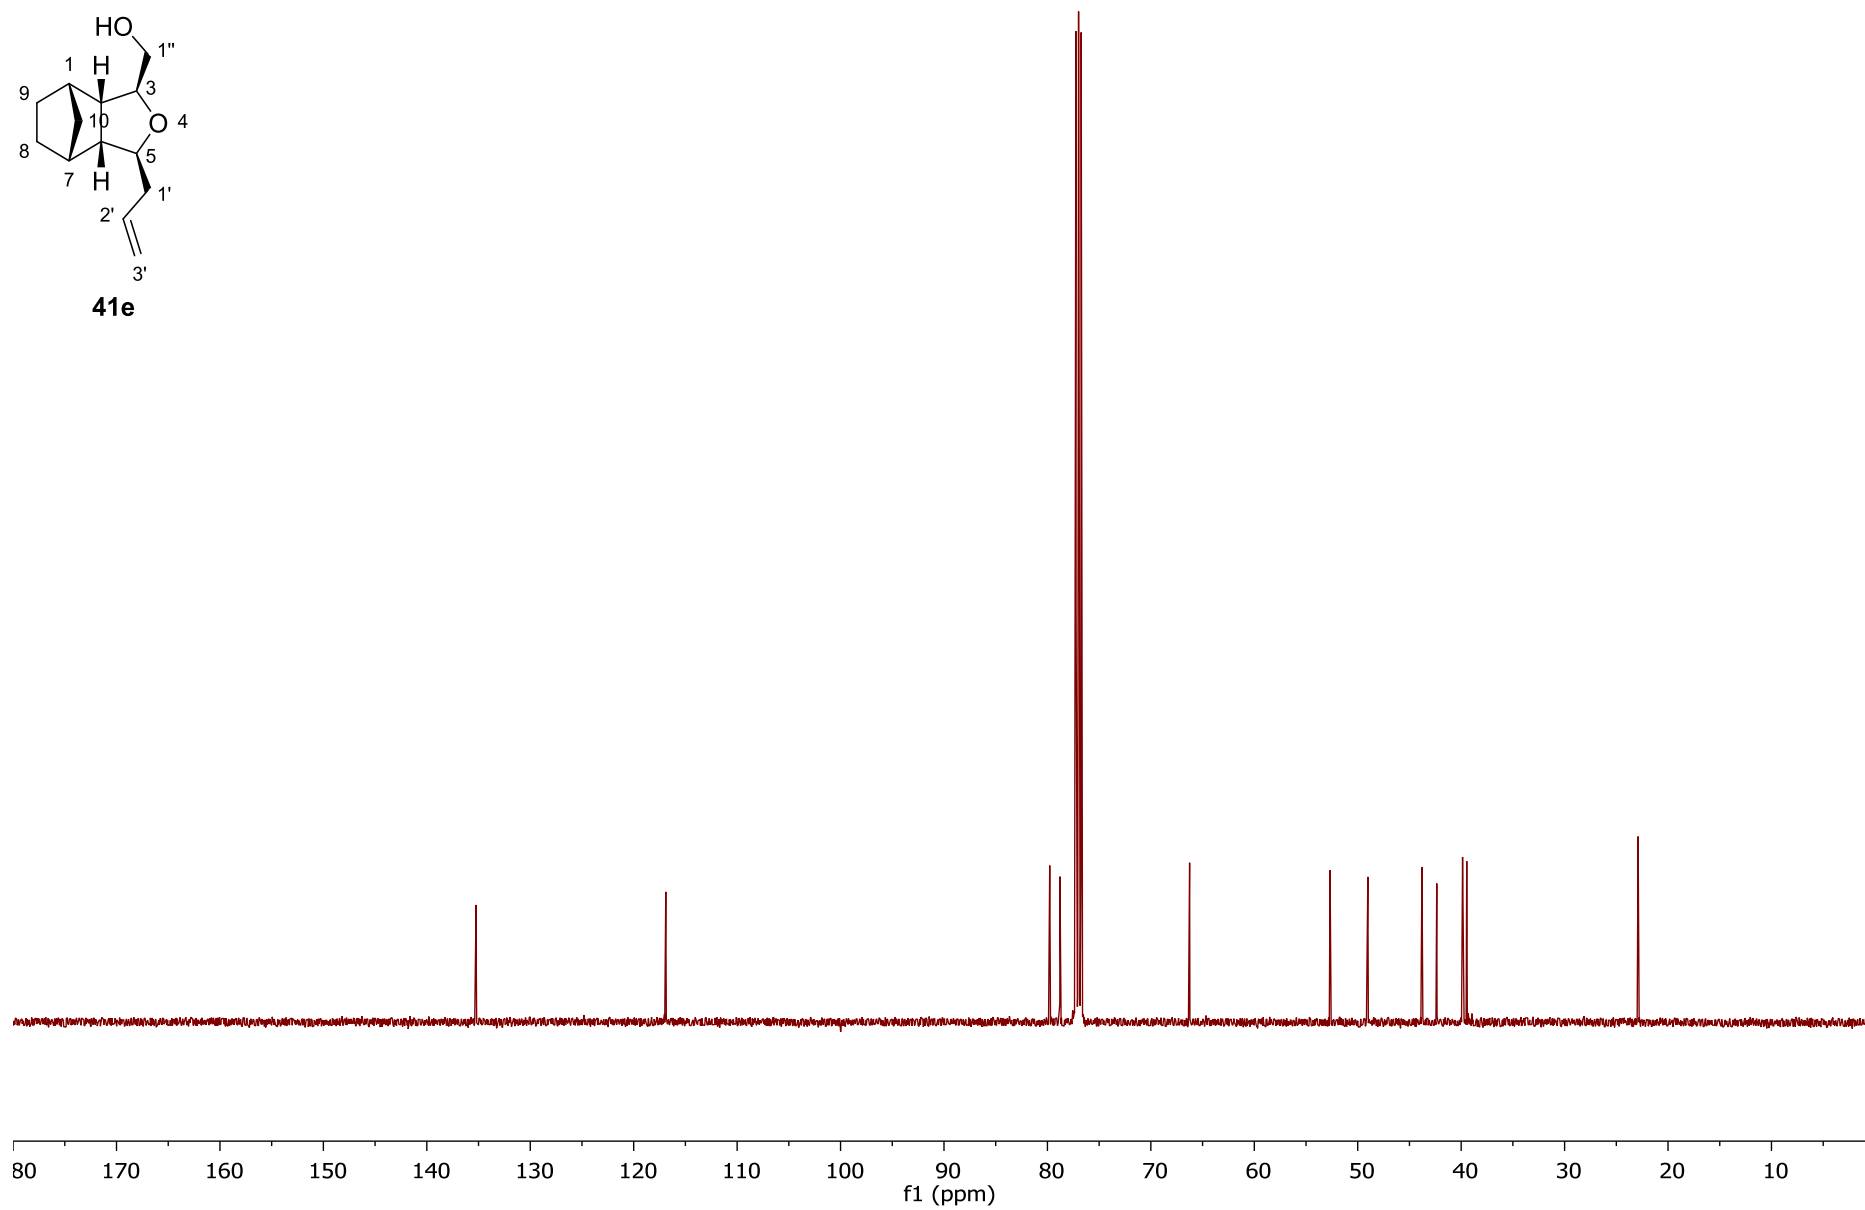

((1S,3S,3aR,4R,7S,7aS)-3-allyloctahydro-4,7-methanoisobenzofuran-1-yl)methyl pent-4-enoate **41f**

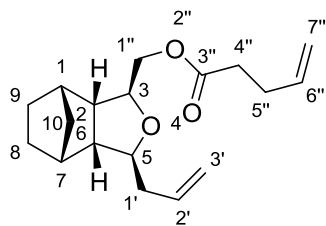

**41f**

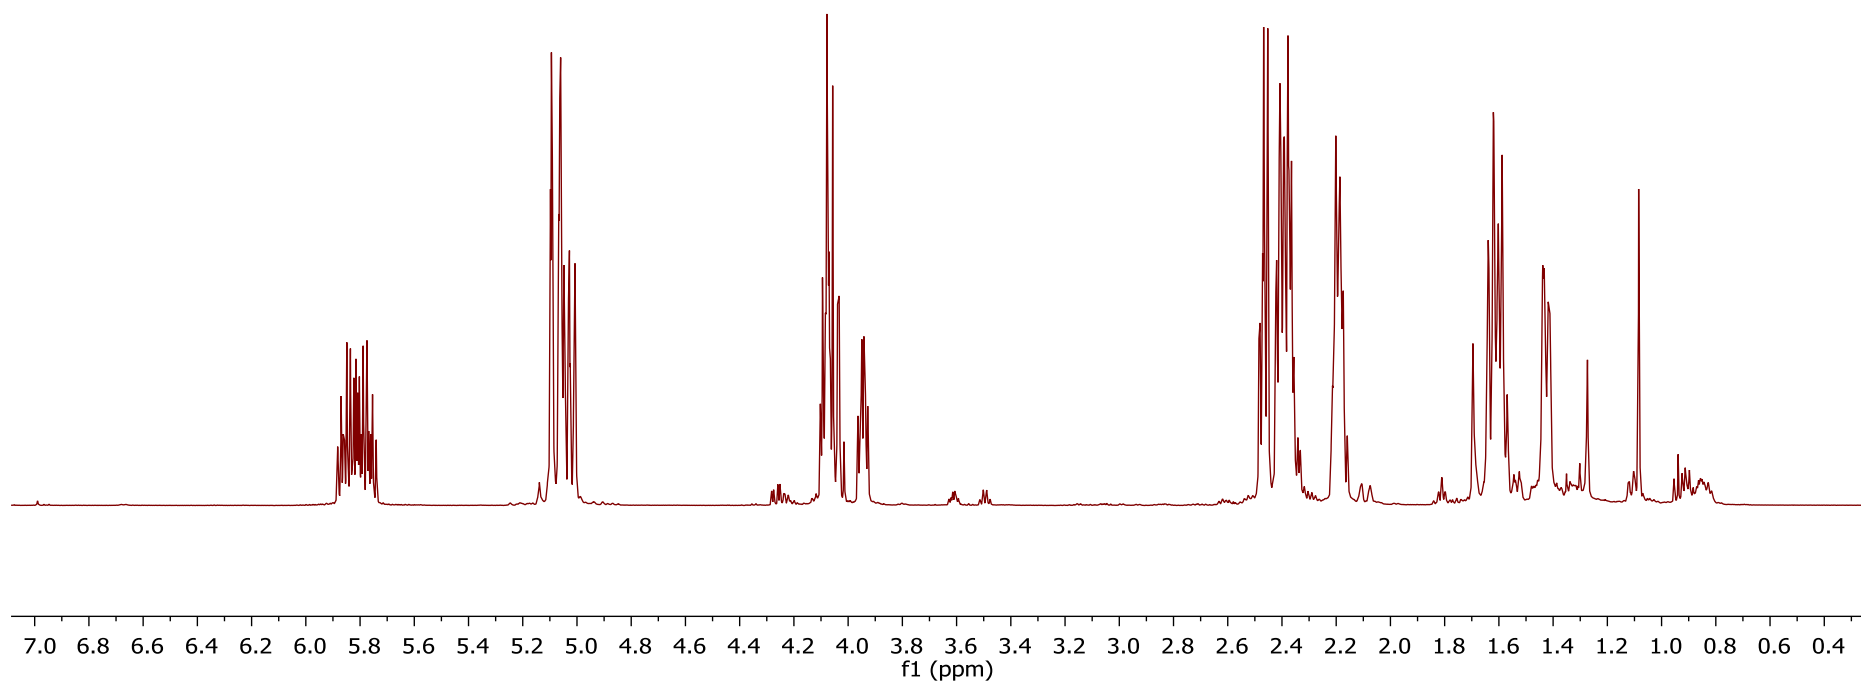

((1*S*,3*S*,3*a**R*,4*R*,7*S*,7*a**S*)-3-allyloctahydro-4,7-methanoisobenzofuran-1-yl)methyl pent-4-enoate **41f**

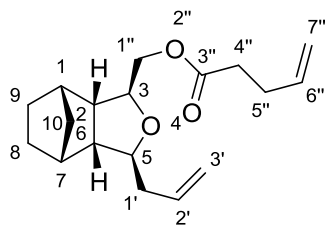

**41f**

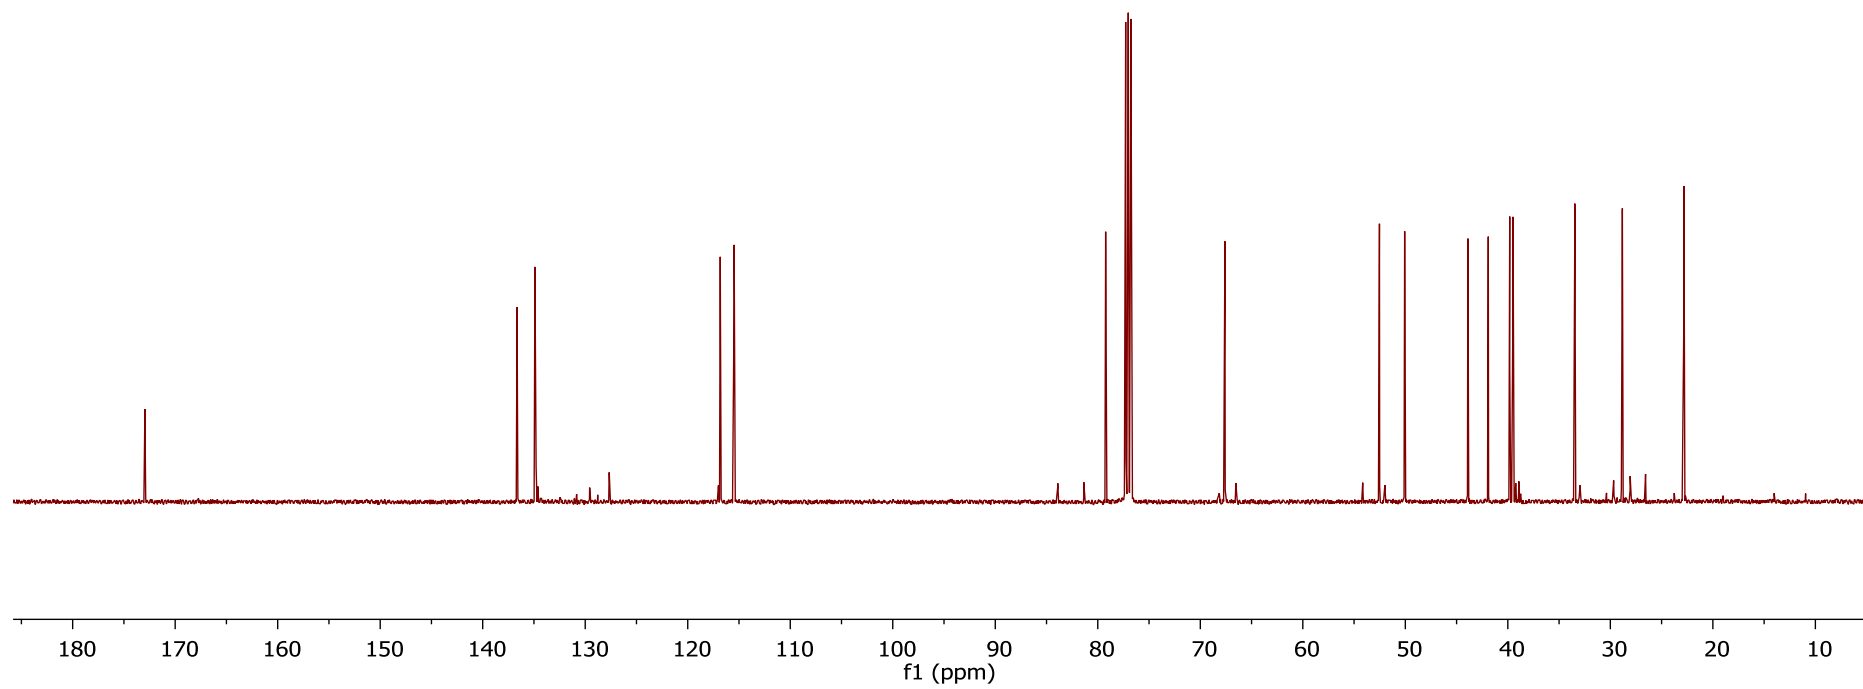

(1S,10S,10aR,11R,14S,14aS)-1,2,5,6,9,10,10a,11,12,13,14,14a-dodecahydro-4H-1,10-epoxy-11,14-methanobenzo[d][1]oxacyclododecin-4-one  
**41**

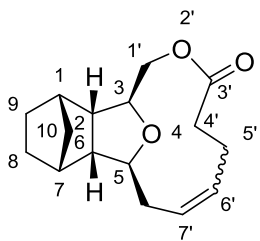

**41**

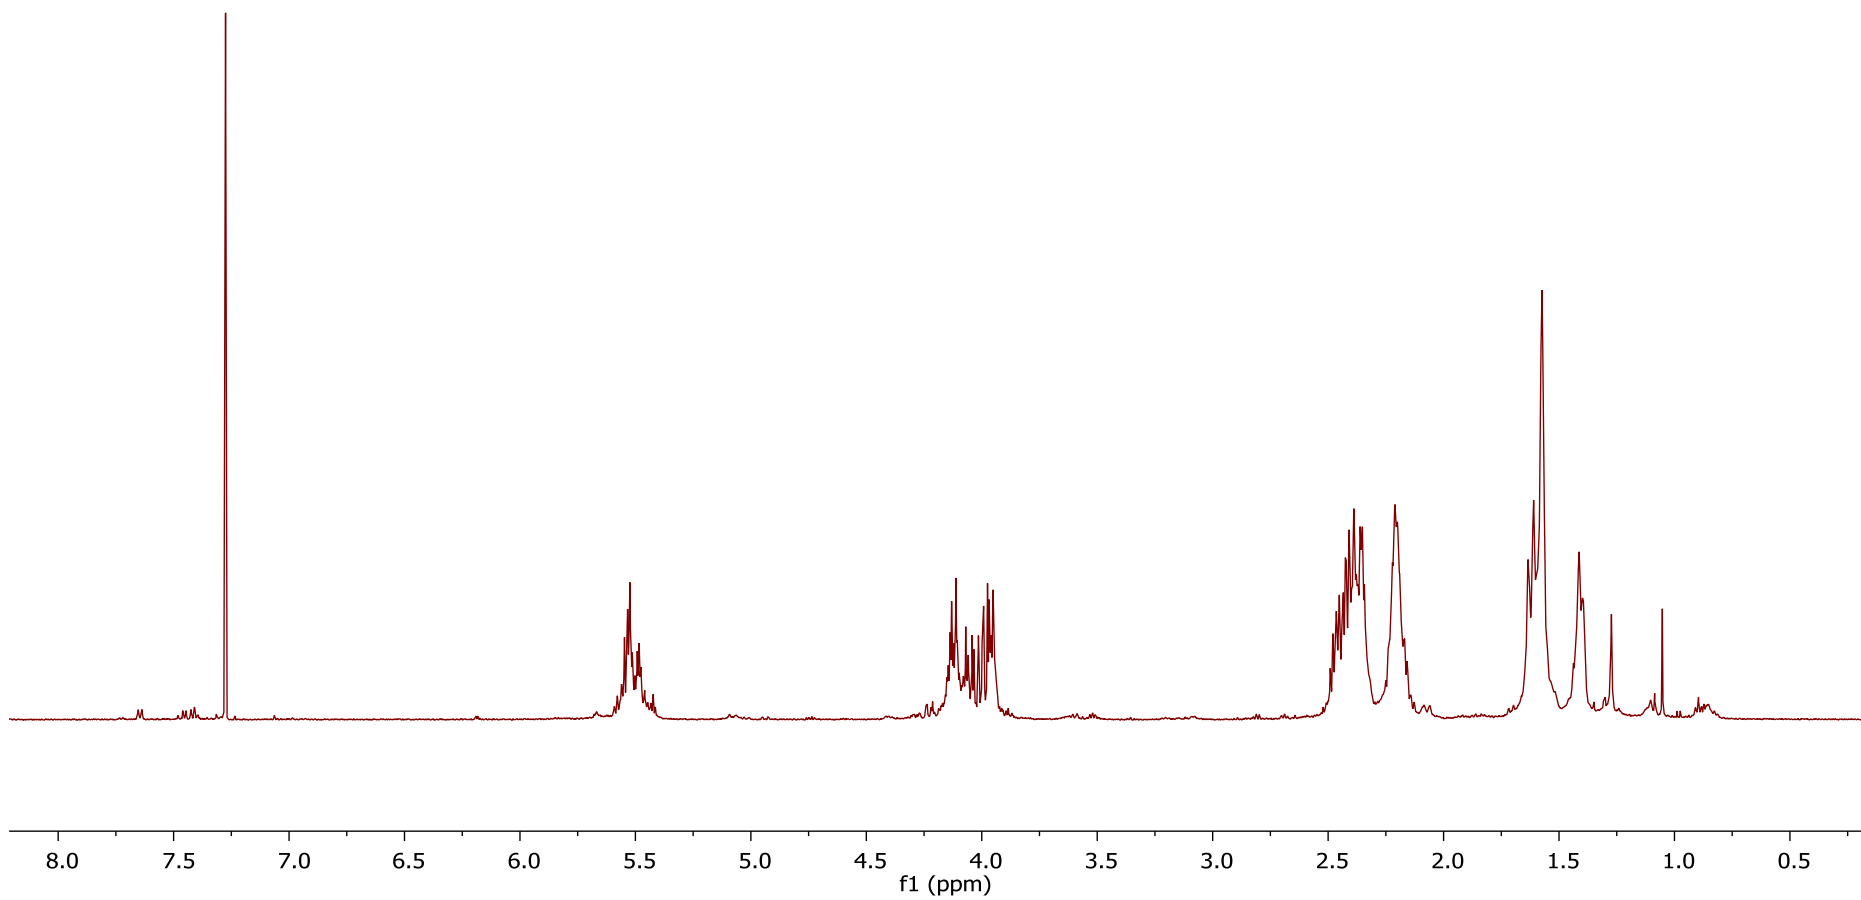

(1S,10S,10aR,11R,14S,14aS)-1,2,5,6,9,10,10a,11,12,13,14,14a-dodecahydro-4H-1,10-epoxy-11,14-methanobenzo[d][1]oxacyclododecin-4-one

**41**

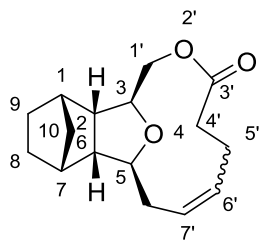

**41**

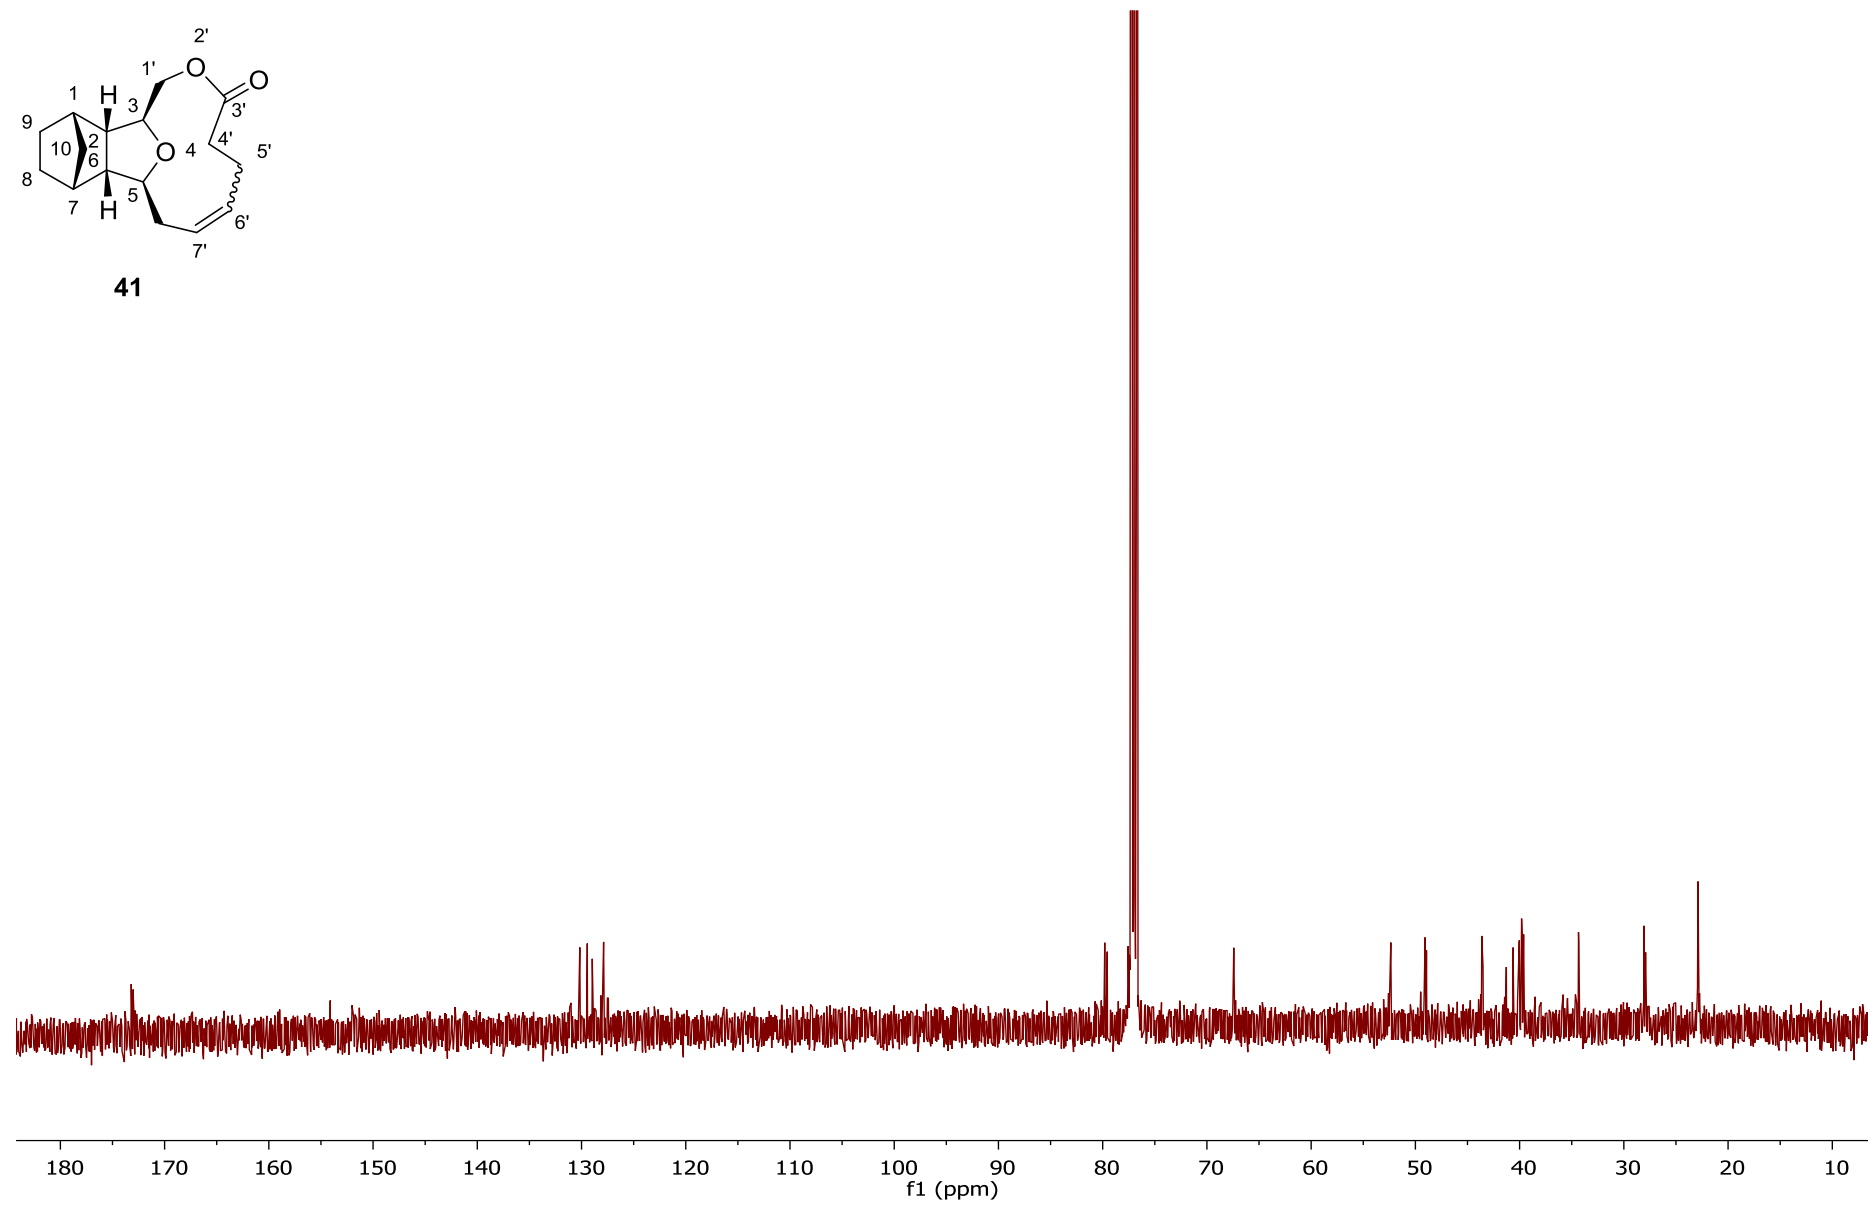



(1S,2S,3S,5S,6R,7R)-5-Allyl-4-oxatricyclo[5.2.1.0<sup>2,6</sup>]dec-3-ylmethyl hex-5-enoate **83**

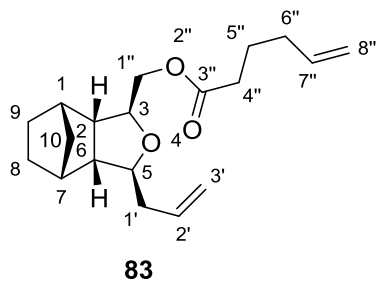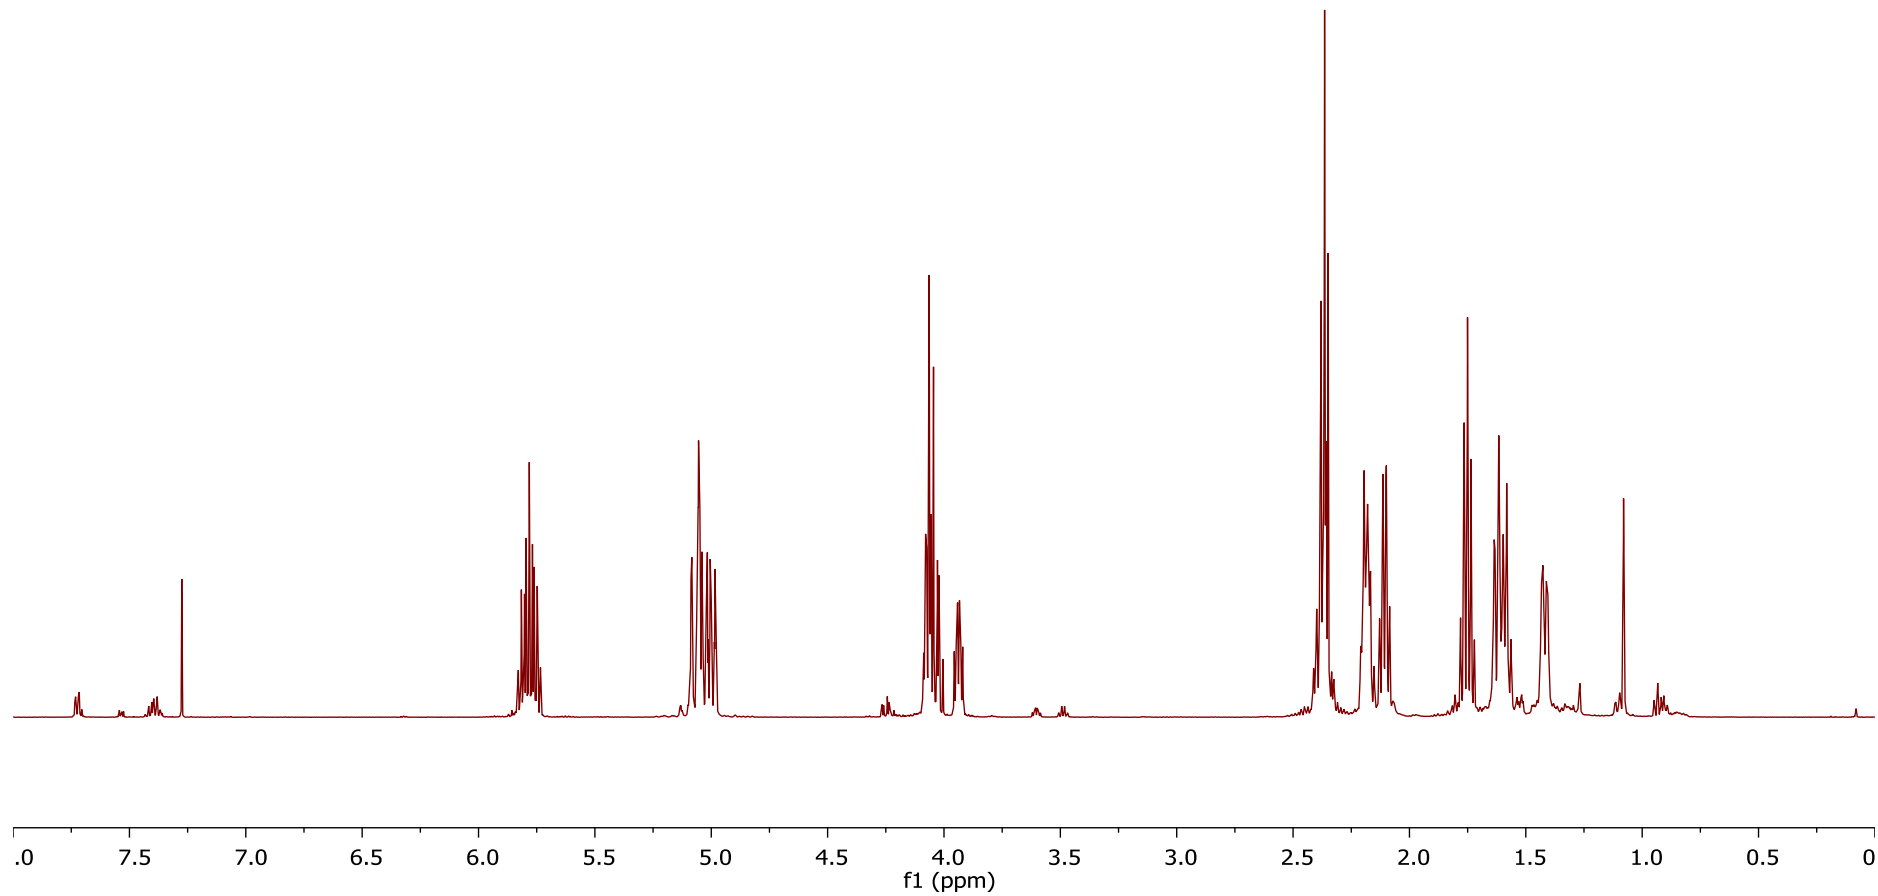

(1*S*,2*S*,3*S*,5*S*,6*R*,7*R*)-5-Allyl-4-oxatricyclo[5.2.1.0<sup>2,6</sup>]dec-3-ylmethyl hex-5-enoate **83**

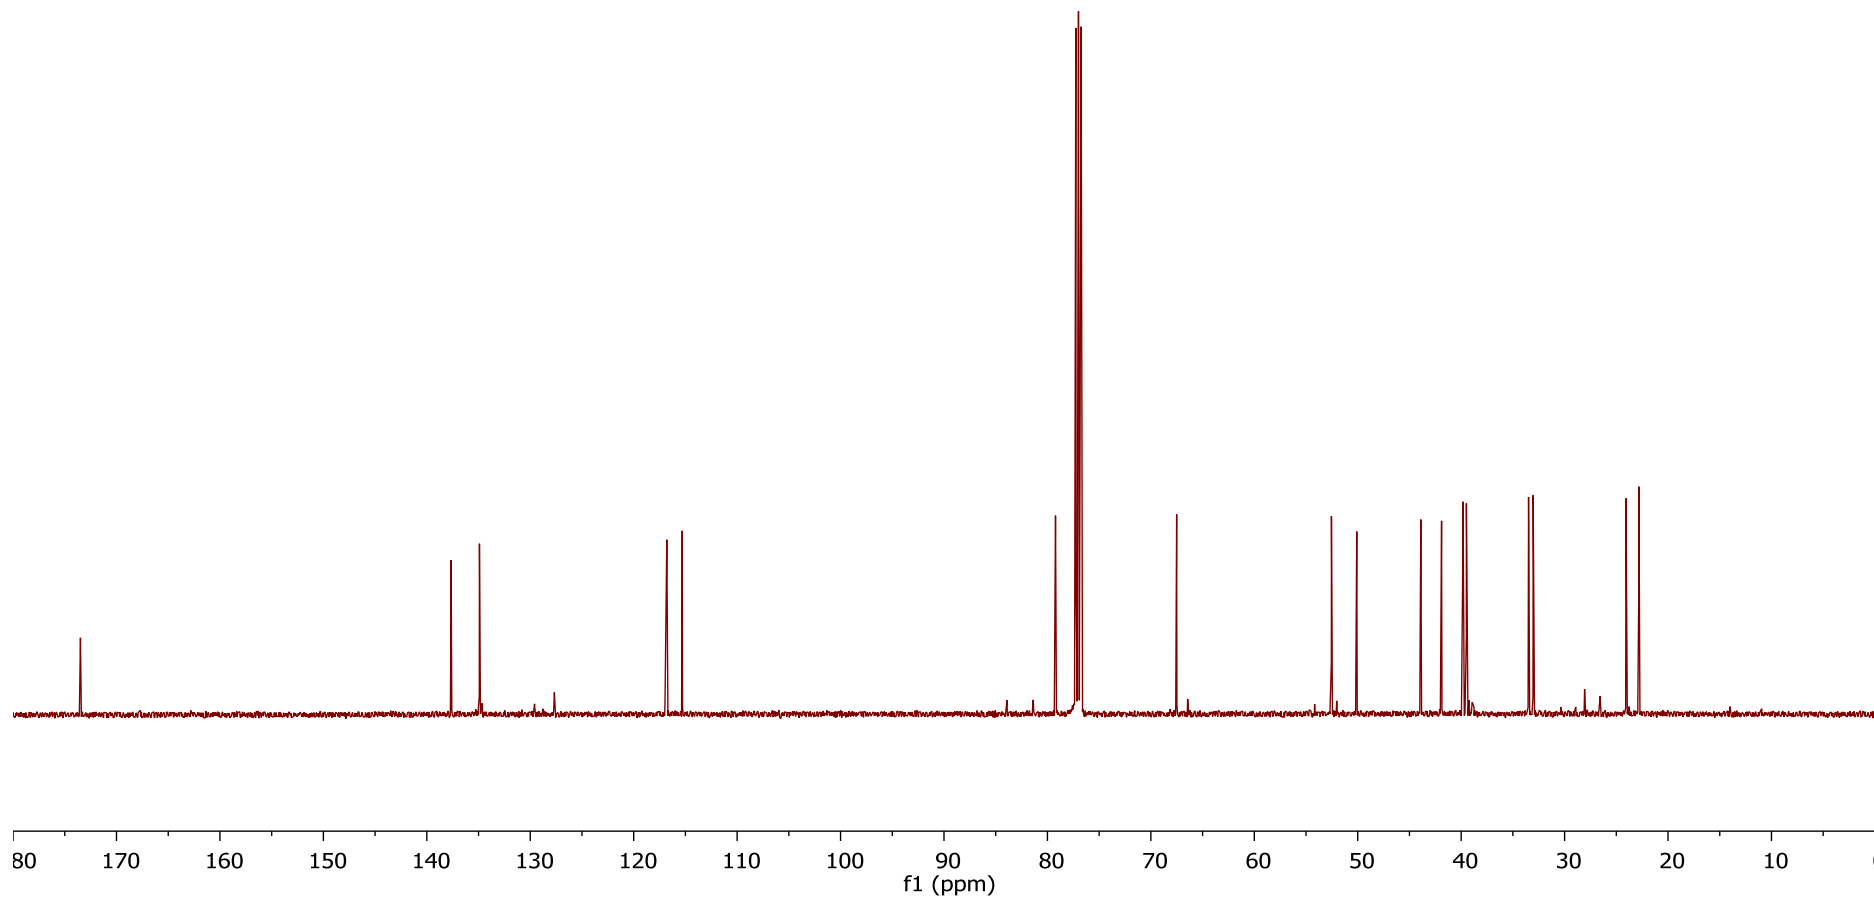

(E)-(1S,11S,12R,17S)-3,18-Dioxatetracyclo[9.6.1.1<sup>13,16</sup>.0<sup>12,17</sup>]nonadec-8-en-4-one **42**

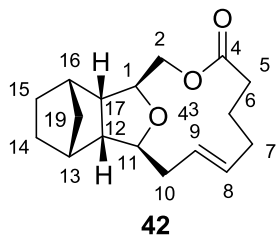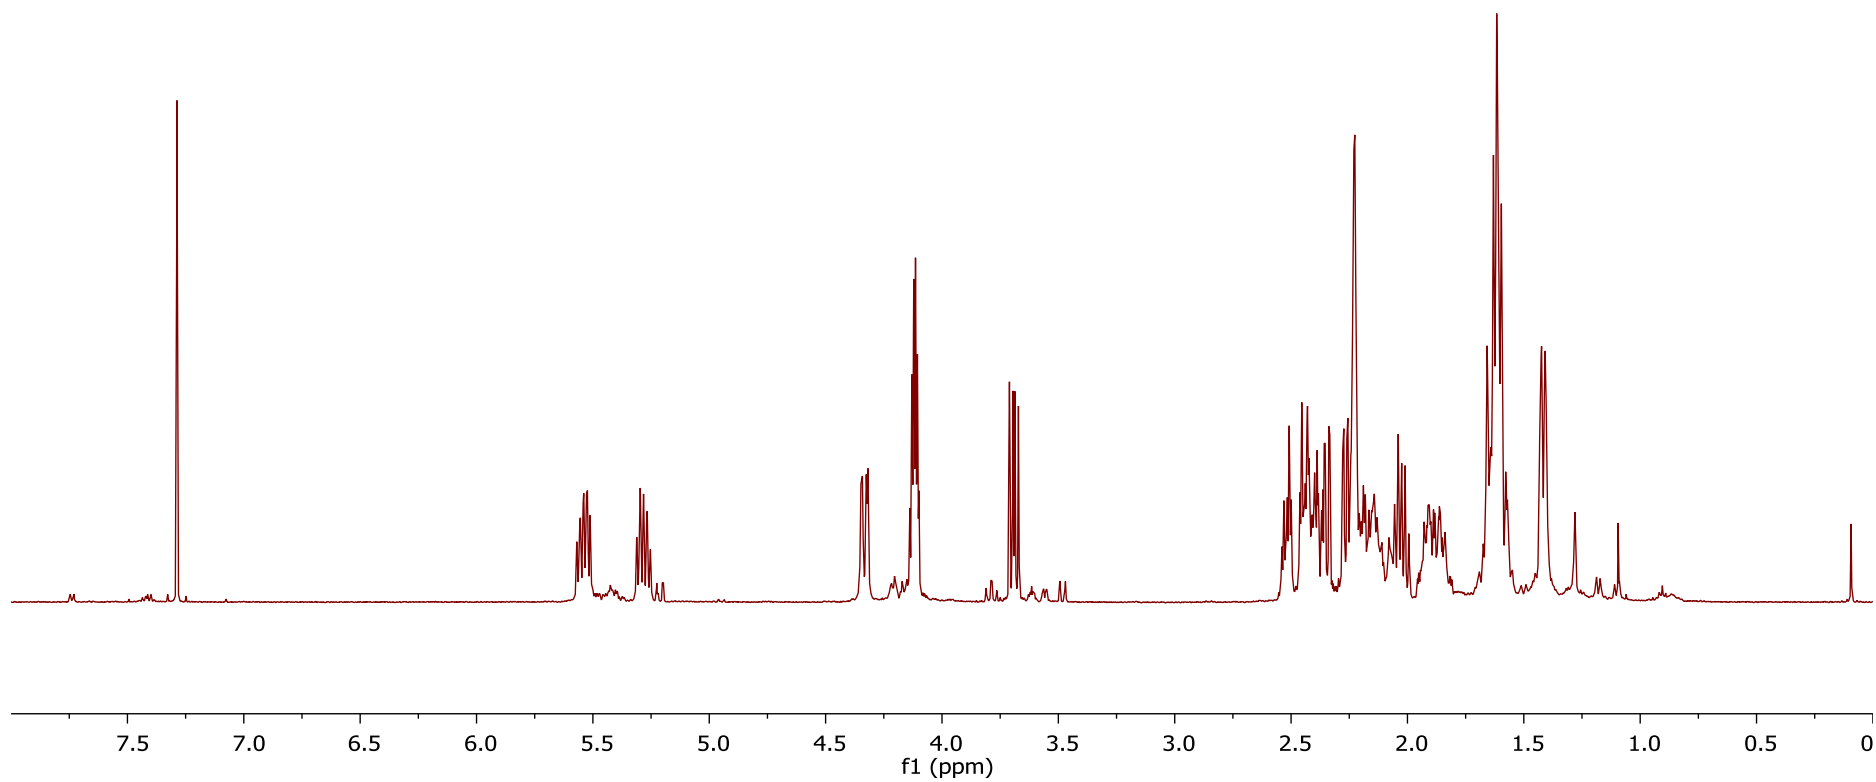

(E)-(1S,11S,12R,17S)-3,18-Dioxatetracyclo[9.6.1.1<sup>13,16</sup>.0<sup>12,17</sup>]nonadec-8-en-4-one **42**

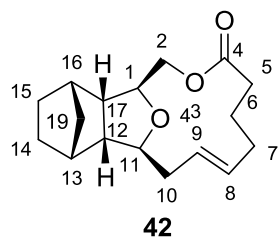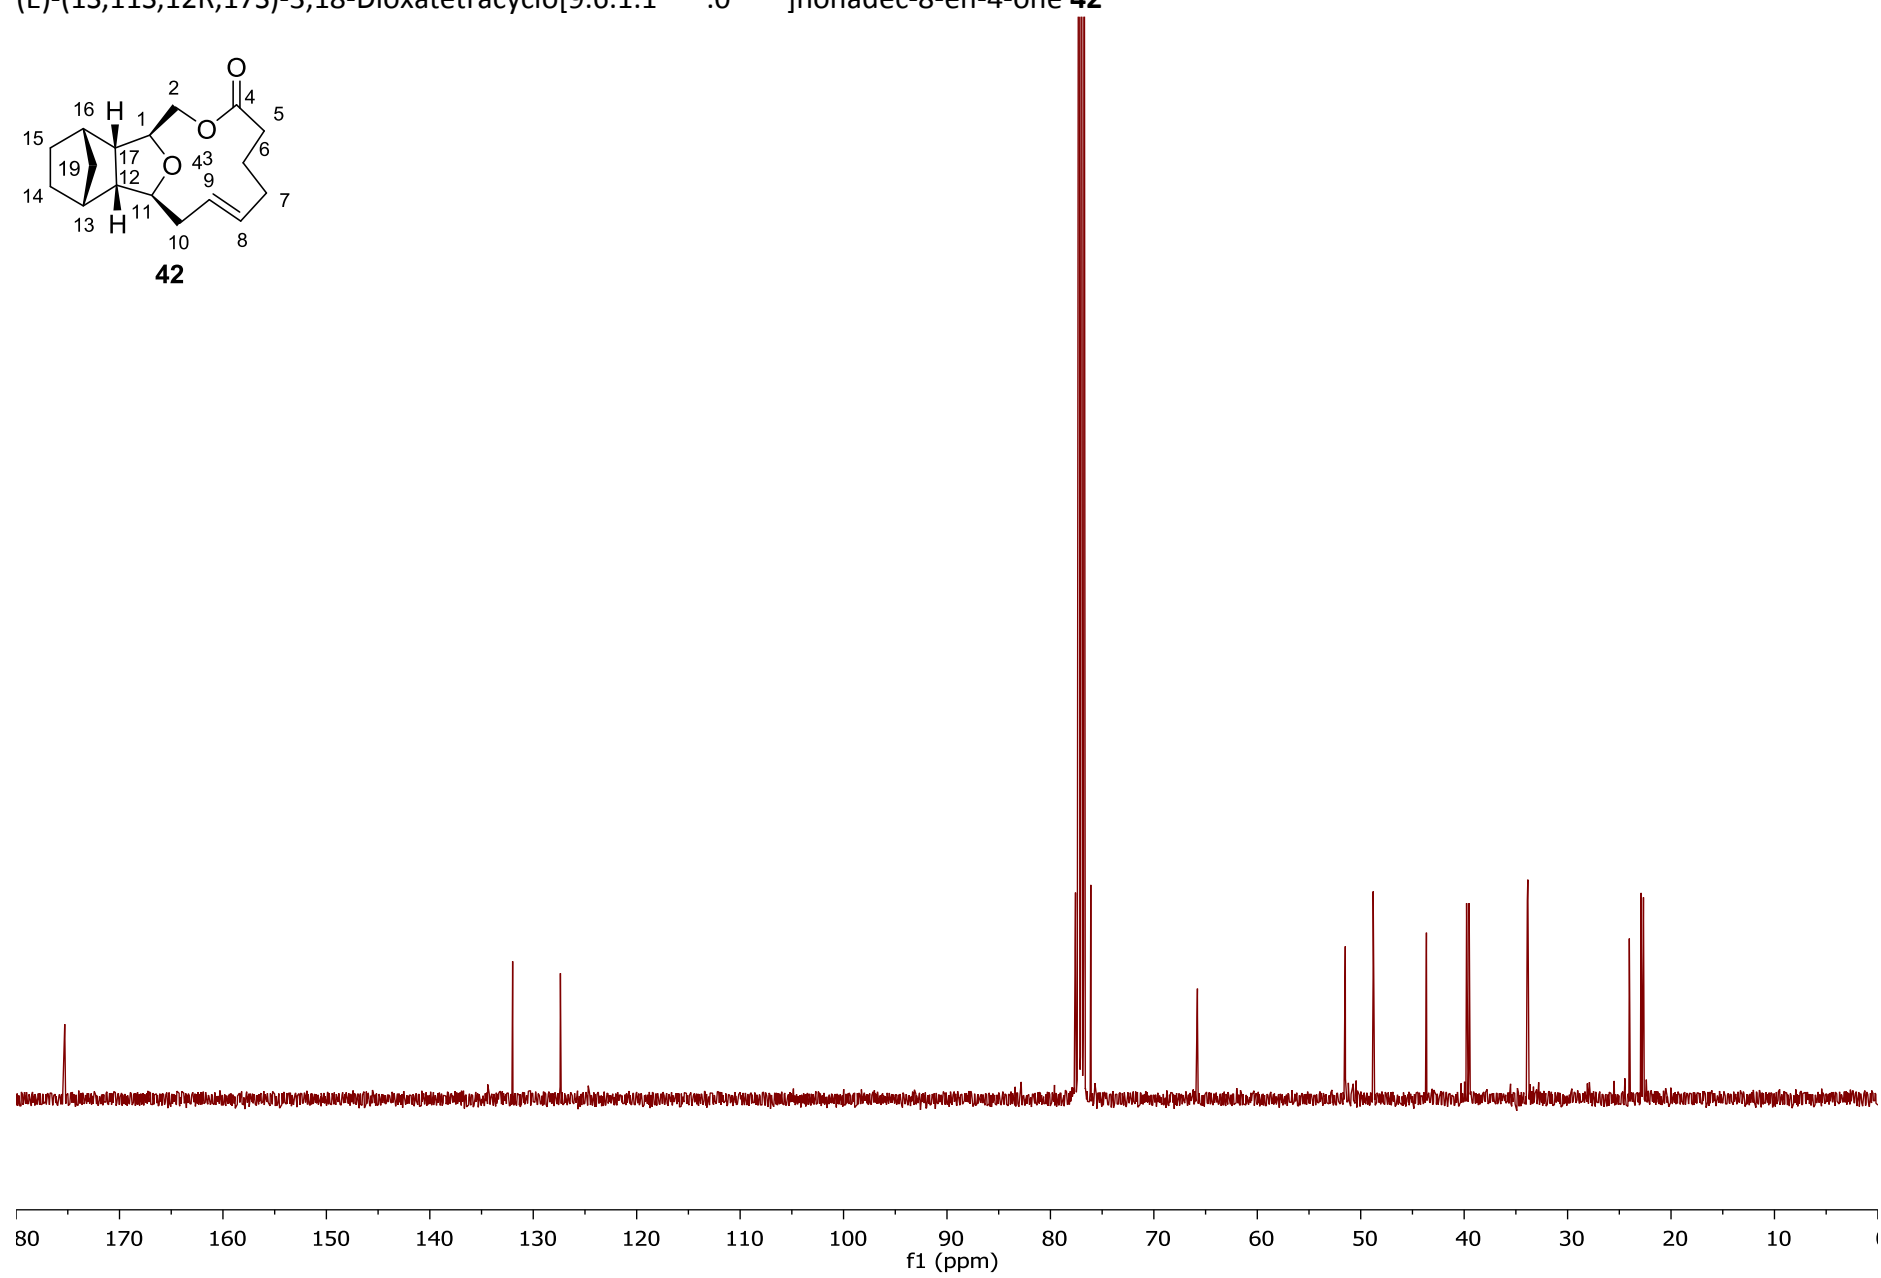

2-[(1R,3S,3aS,7aR)-3-[[tert-butyl(diphenyl)silyloxy]methyl]-1,3,3a,4,7,7a-hexahydro-2-benzofuran-1-yl]-2-methylpropanal **44**

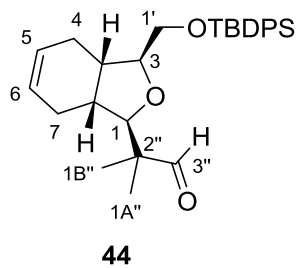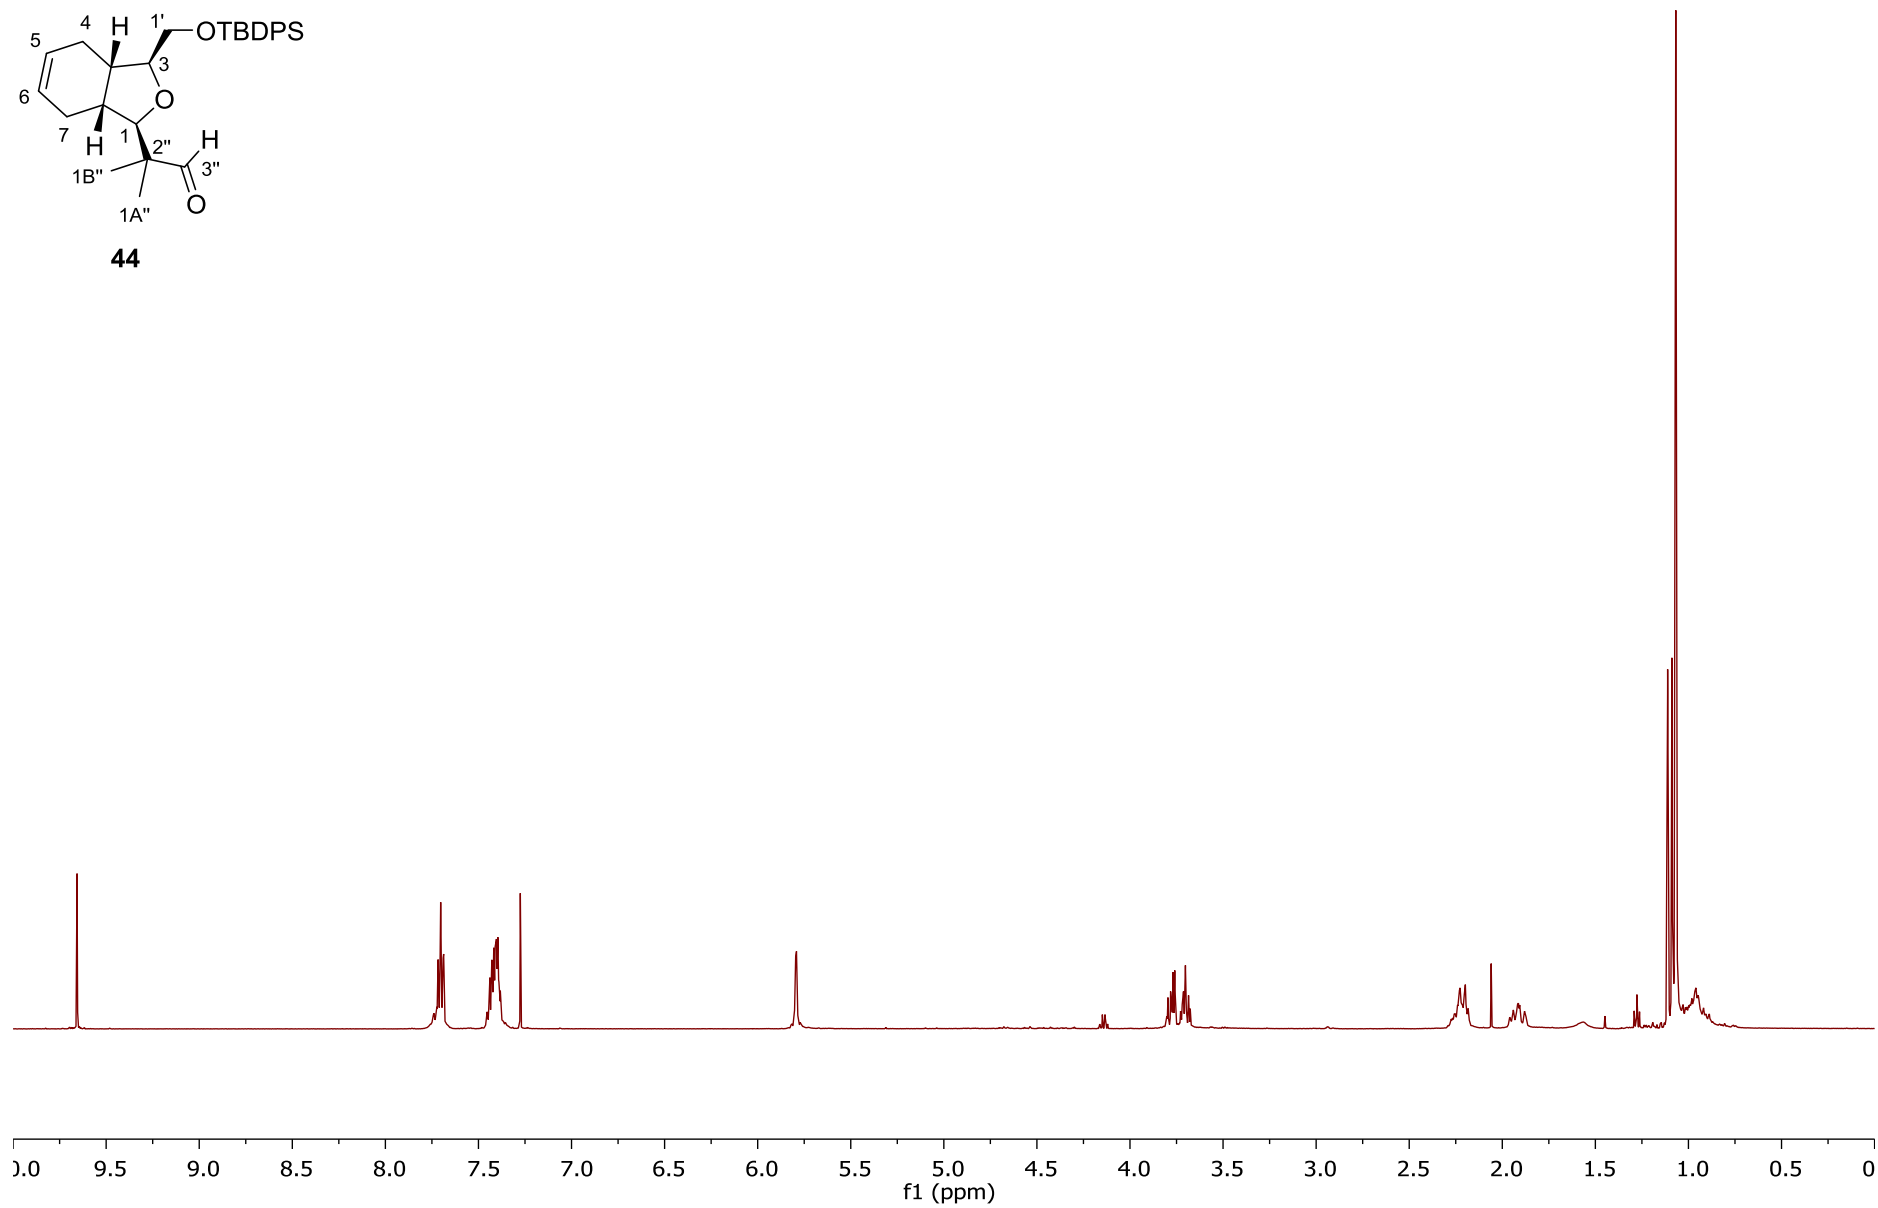

2-[(1R,3S,3aS,7aR)-3-[[tert-butyl(diphenyl)silyloxy]methyl]-1,3,3a,4,7,7a-hexahydro-2-benzofuran-1-yl]-2-methylpropanal **44**

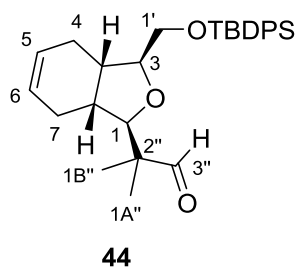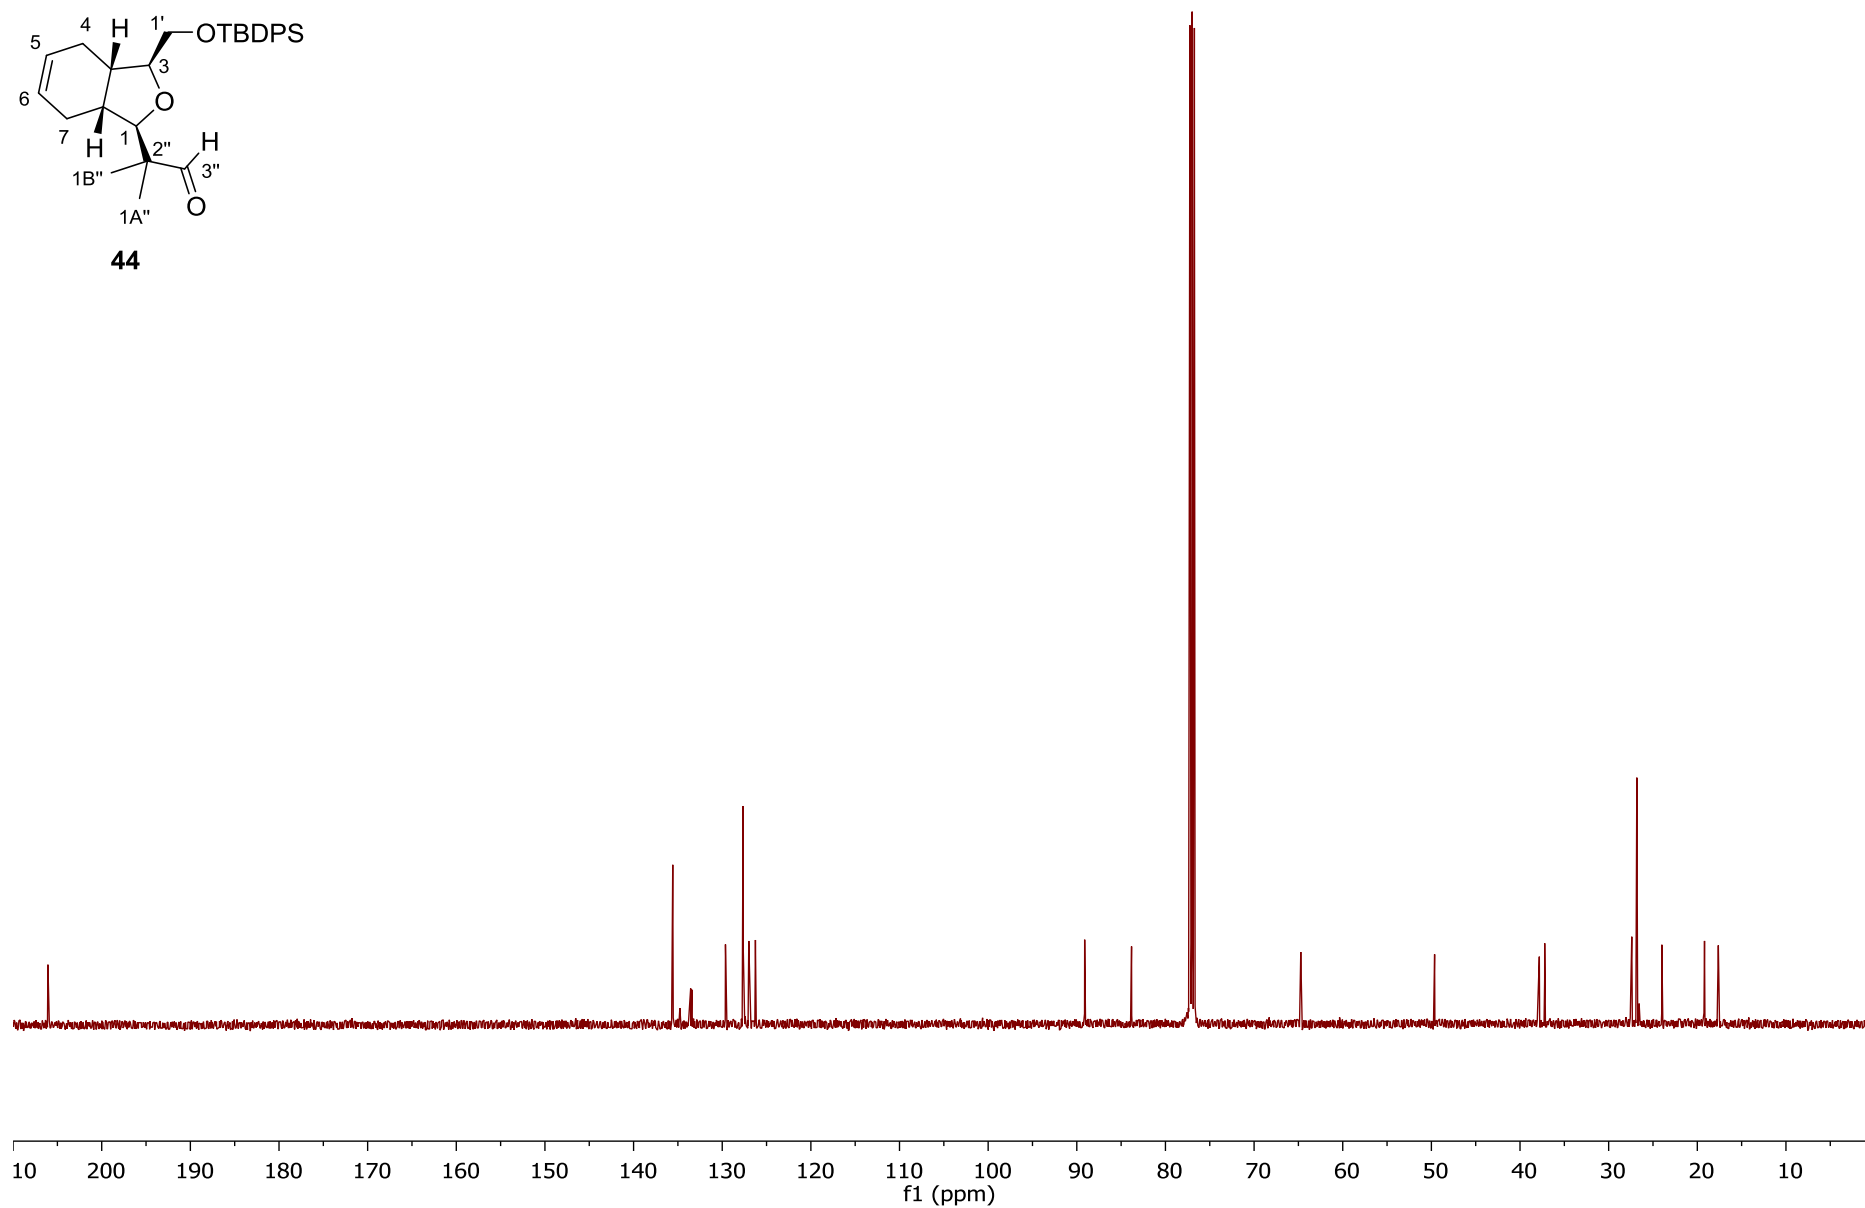

2-((1S,3S,3aS,7aR)-3-(((tert-butyldiphenylsilyl)oxy)methyl)-1,3,3a,4,7,7a-hexahydroisobenzofuran-1-yl)-1-phenylethan-1-one **45**

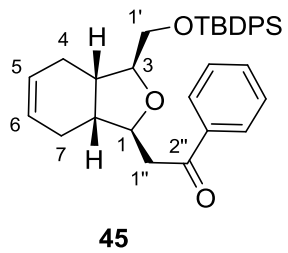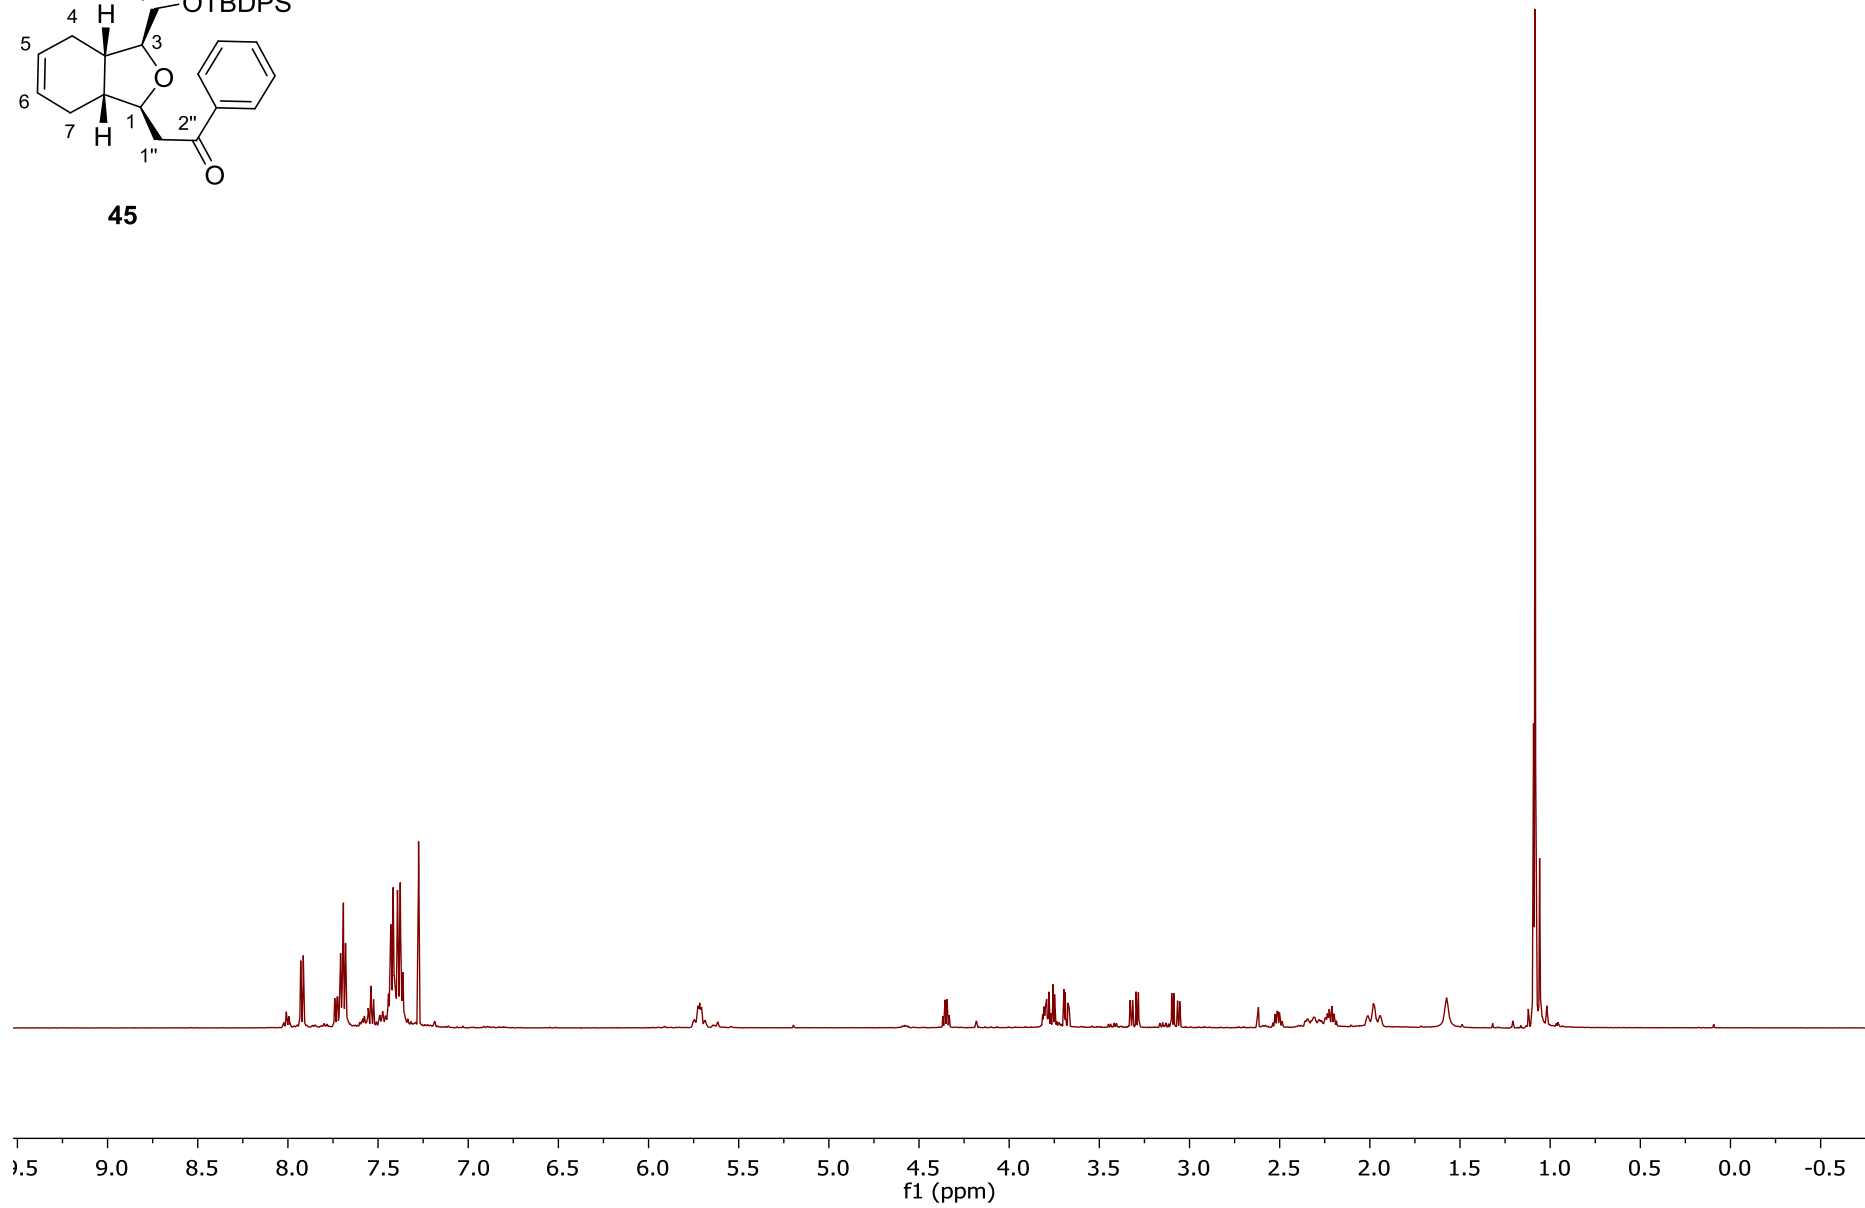

2-((1S,3S,3aS,7aR)-3-(((tert-butyldiphenylsilyl)oxy)methyl)-1,3,3a,4,7,7a-hexahydroisobenzofuran-1-yl)-1-phenylethan-1-one **45**

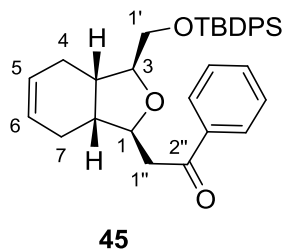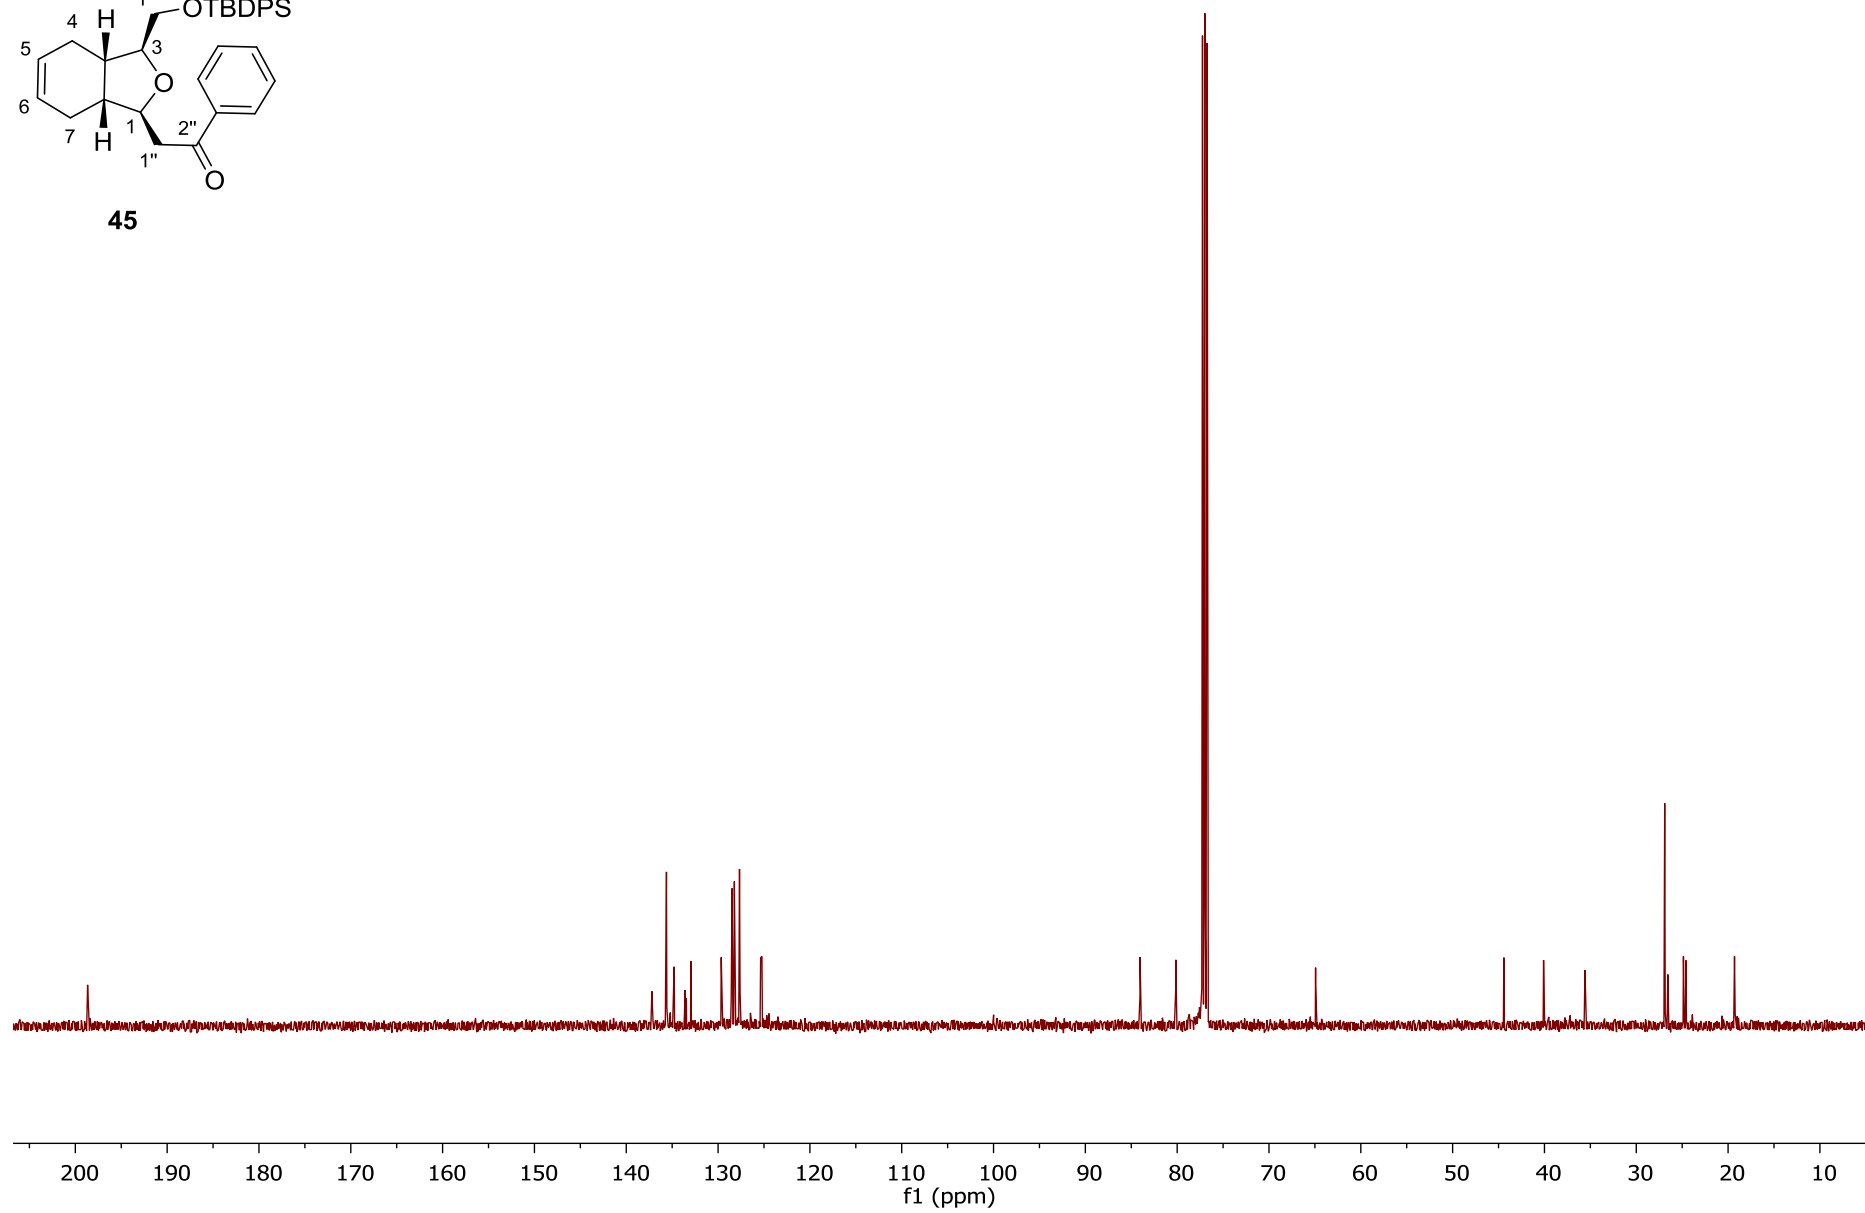



3-[(1R,3S,3aS,7aR)-3-[[*tert*-Butyldiphenylsilyl]oxy]methyl]-octahydro-2-benzofuran-1-yl]-3-methylbutan-2-one **46a**

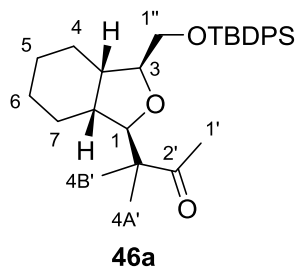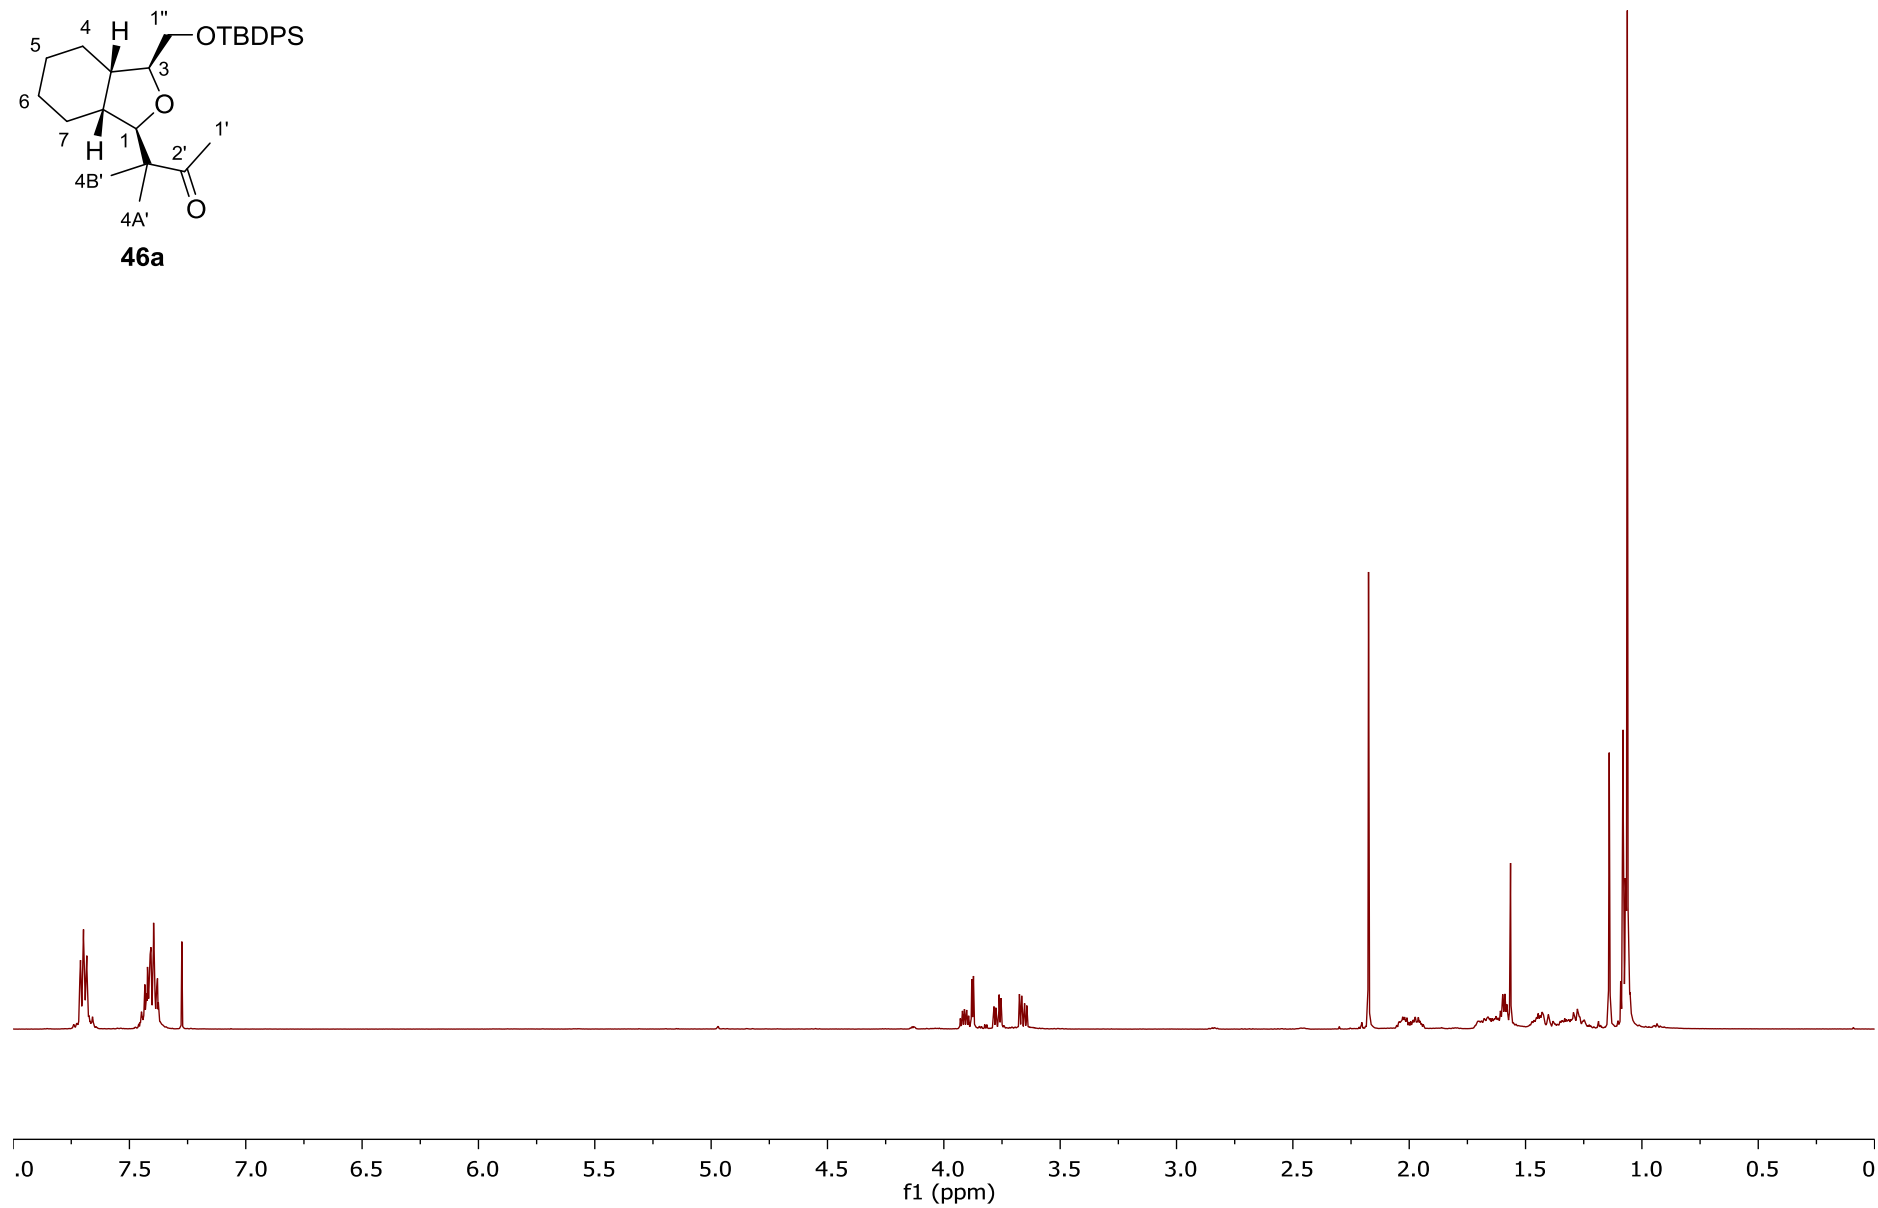

3-[(1R,3S,3aS,7aR)-3-[[*tert*-Butyldiphenylsilyl]oxy]methyl]-octahydro-2-benzofuran-1-yl]-3-methylbutan-2-one **46a**

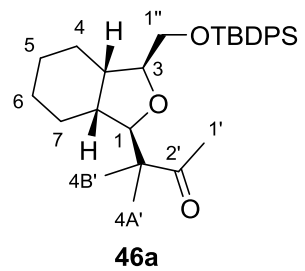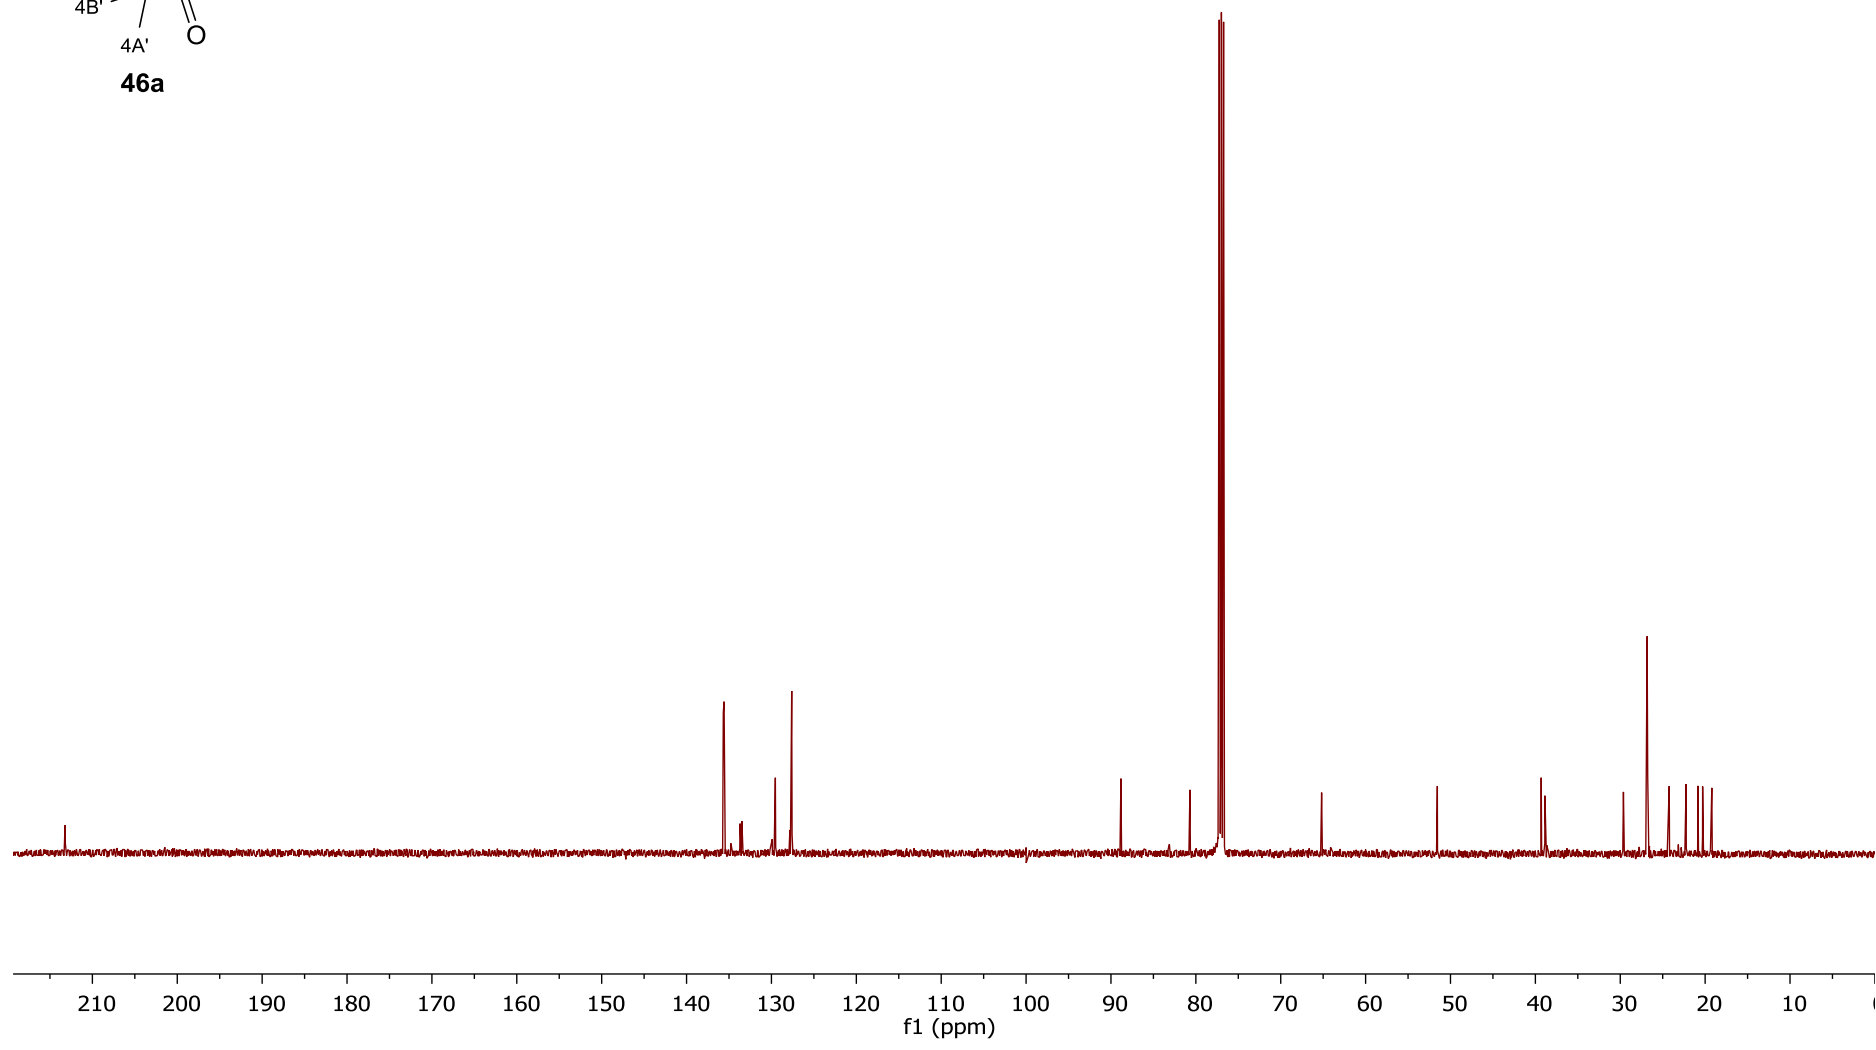

3-[(1R,3S,3aS,7aR)-3-(Hydroxymethyl)-octahydro-2-benzofuran-1-yl]-3-methylbutan-2-one **46**

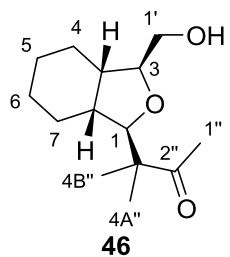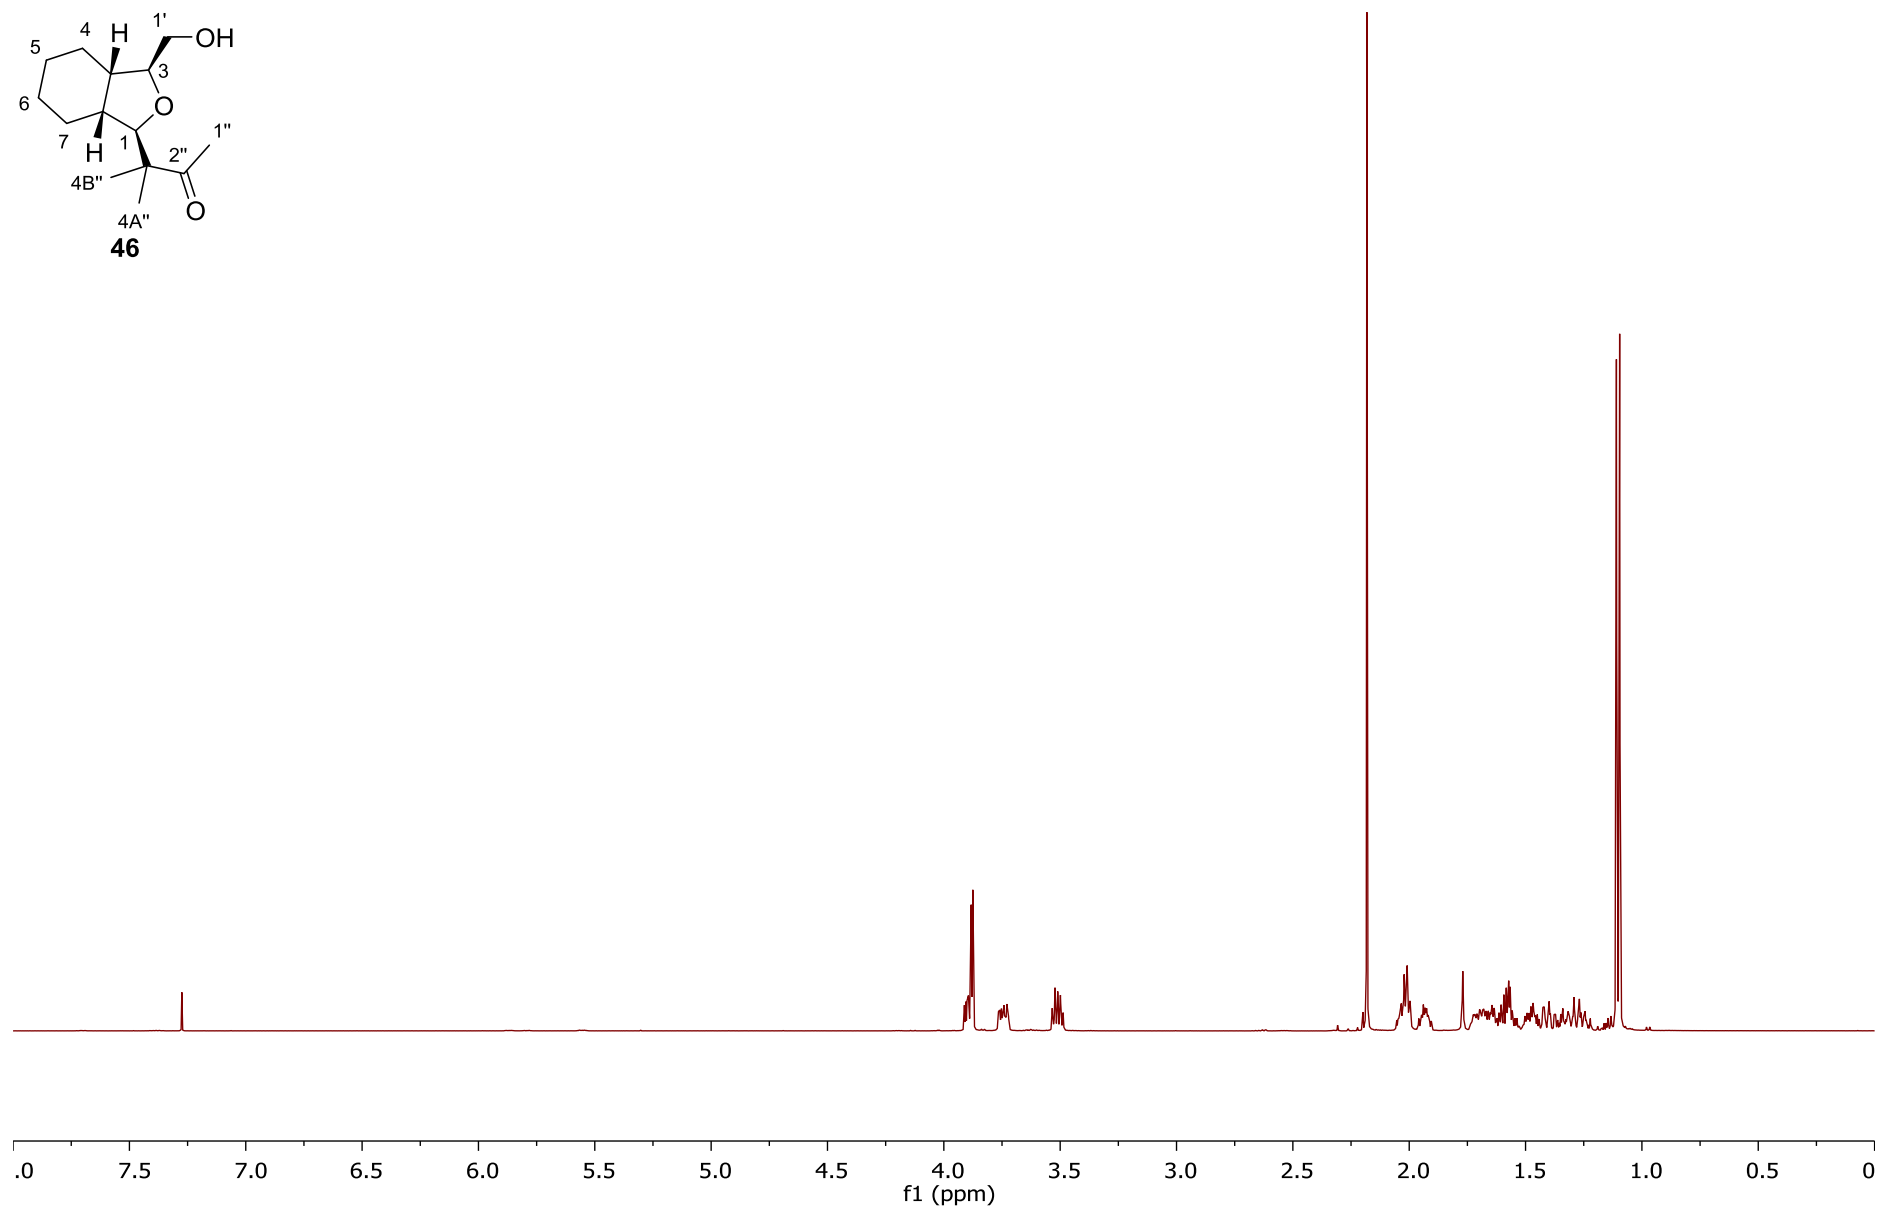

3-[(1R,3S,3aS,7aR)-3-(Hydroxymethyl)-octahydro-2-benzofuran-1-yl]-3-methylbutan-2-one **46**

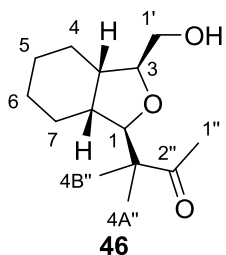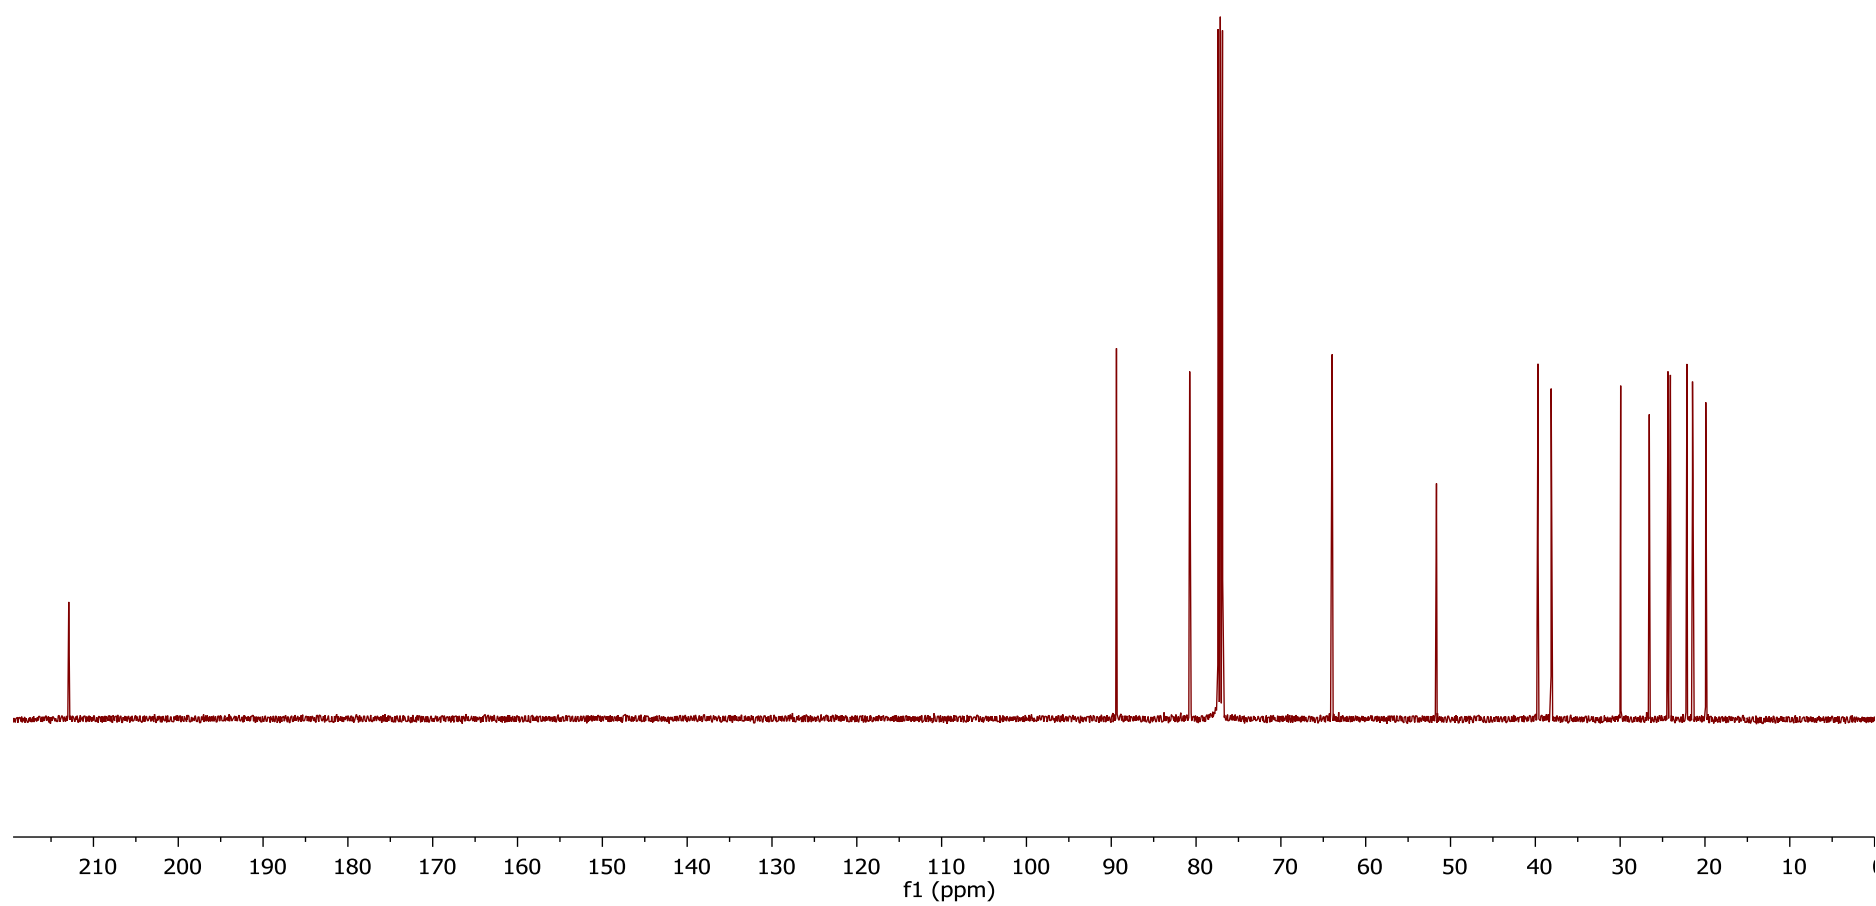

1-((1S,3S,3aS,7aR)-3-(((tert-butylidiphenylsilyl)oxy)methyl)octahydroisobenzofuran-1-yl)-3,3-dimethylbutan-2-one **47**

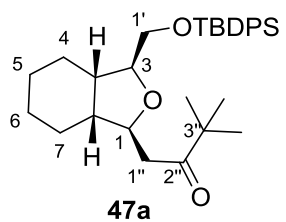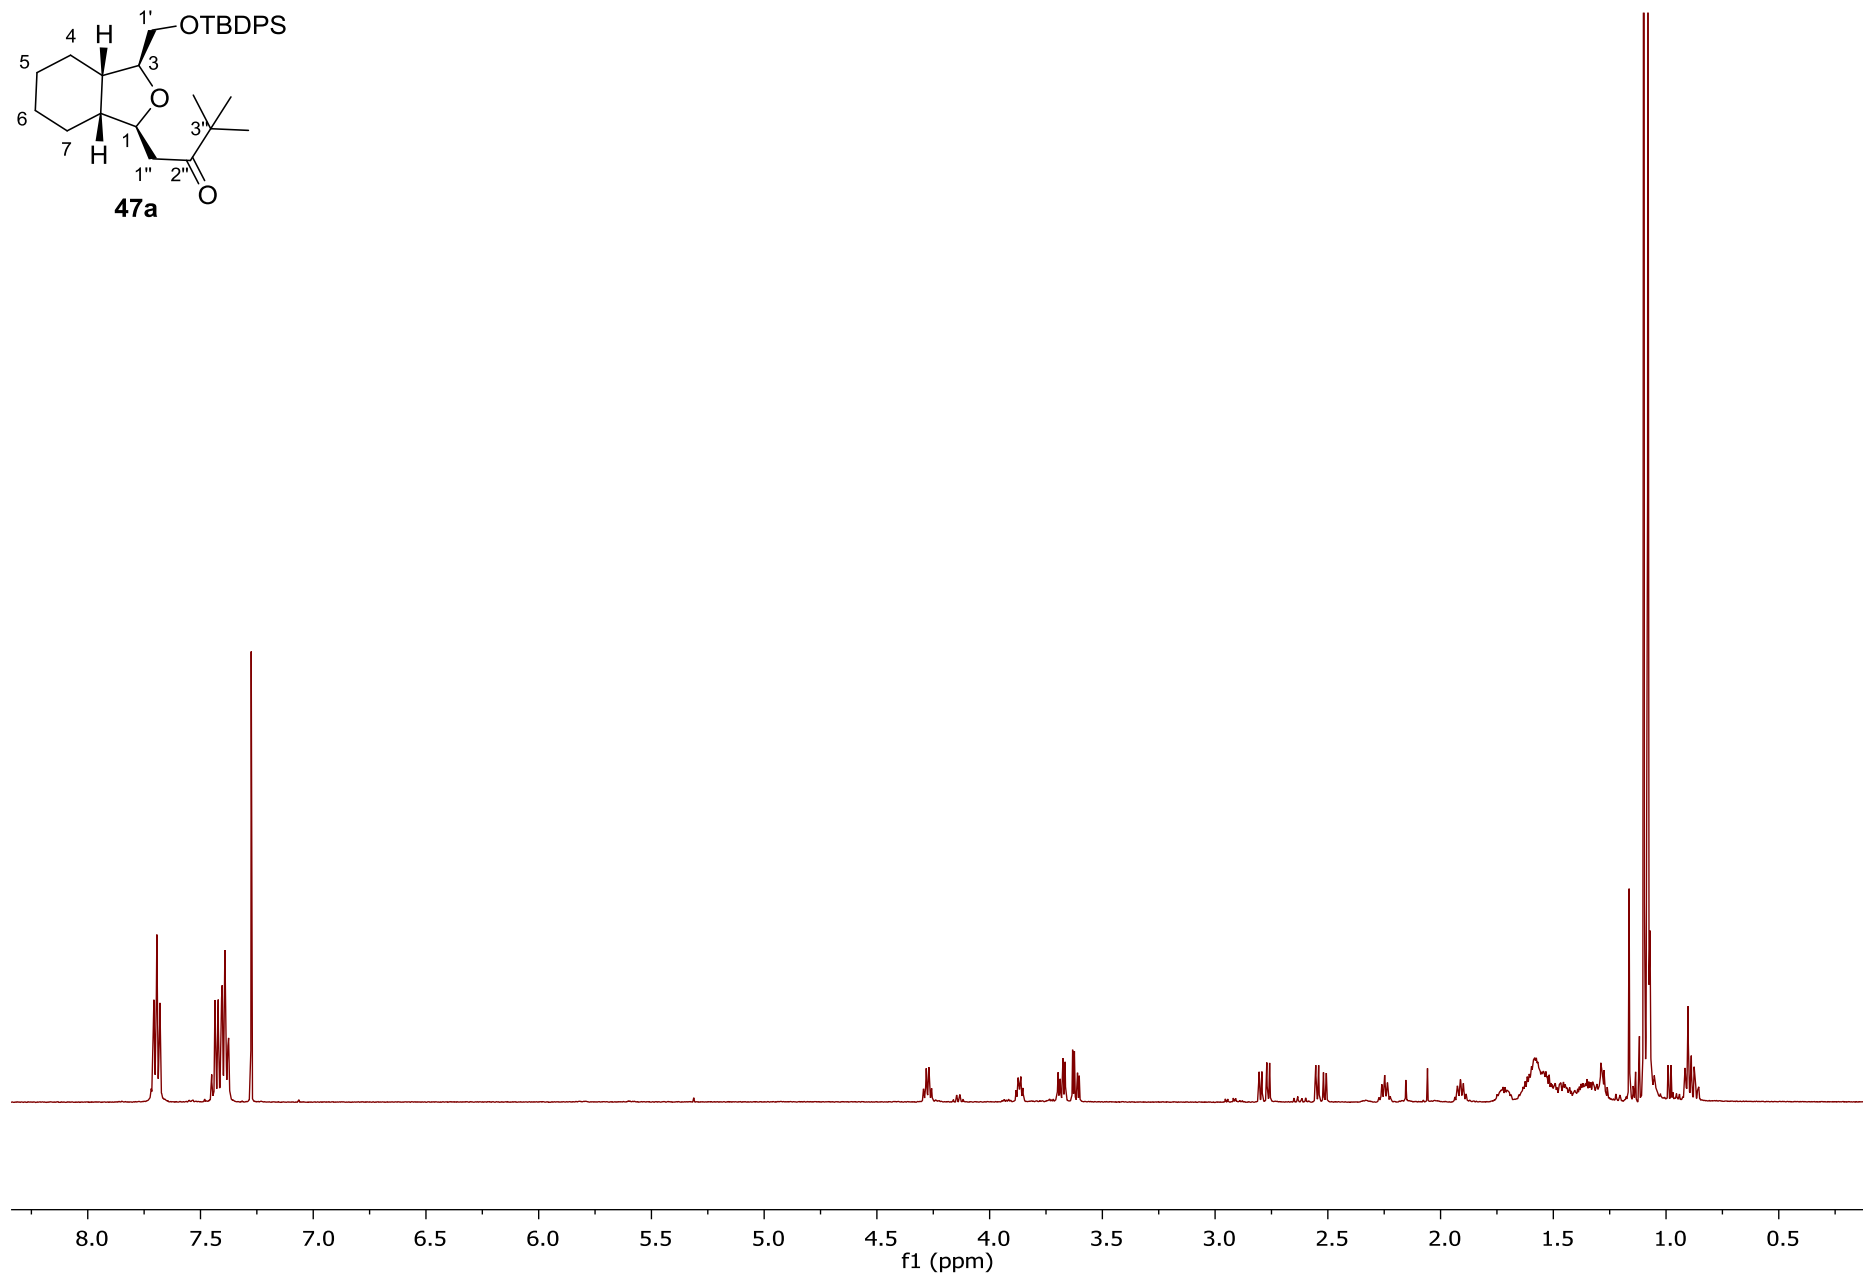

1-((1S,3S,3aS,7aR)-3-(((tert-butyldiphenylsilyl)oxy)methyl)octahydroisobenzofuran-1-yl)-3,3-dimethylbutan-2-one **47**

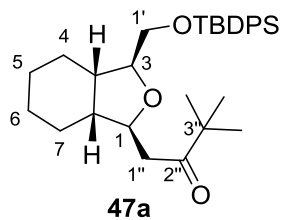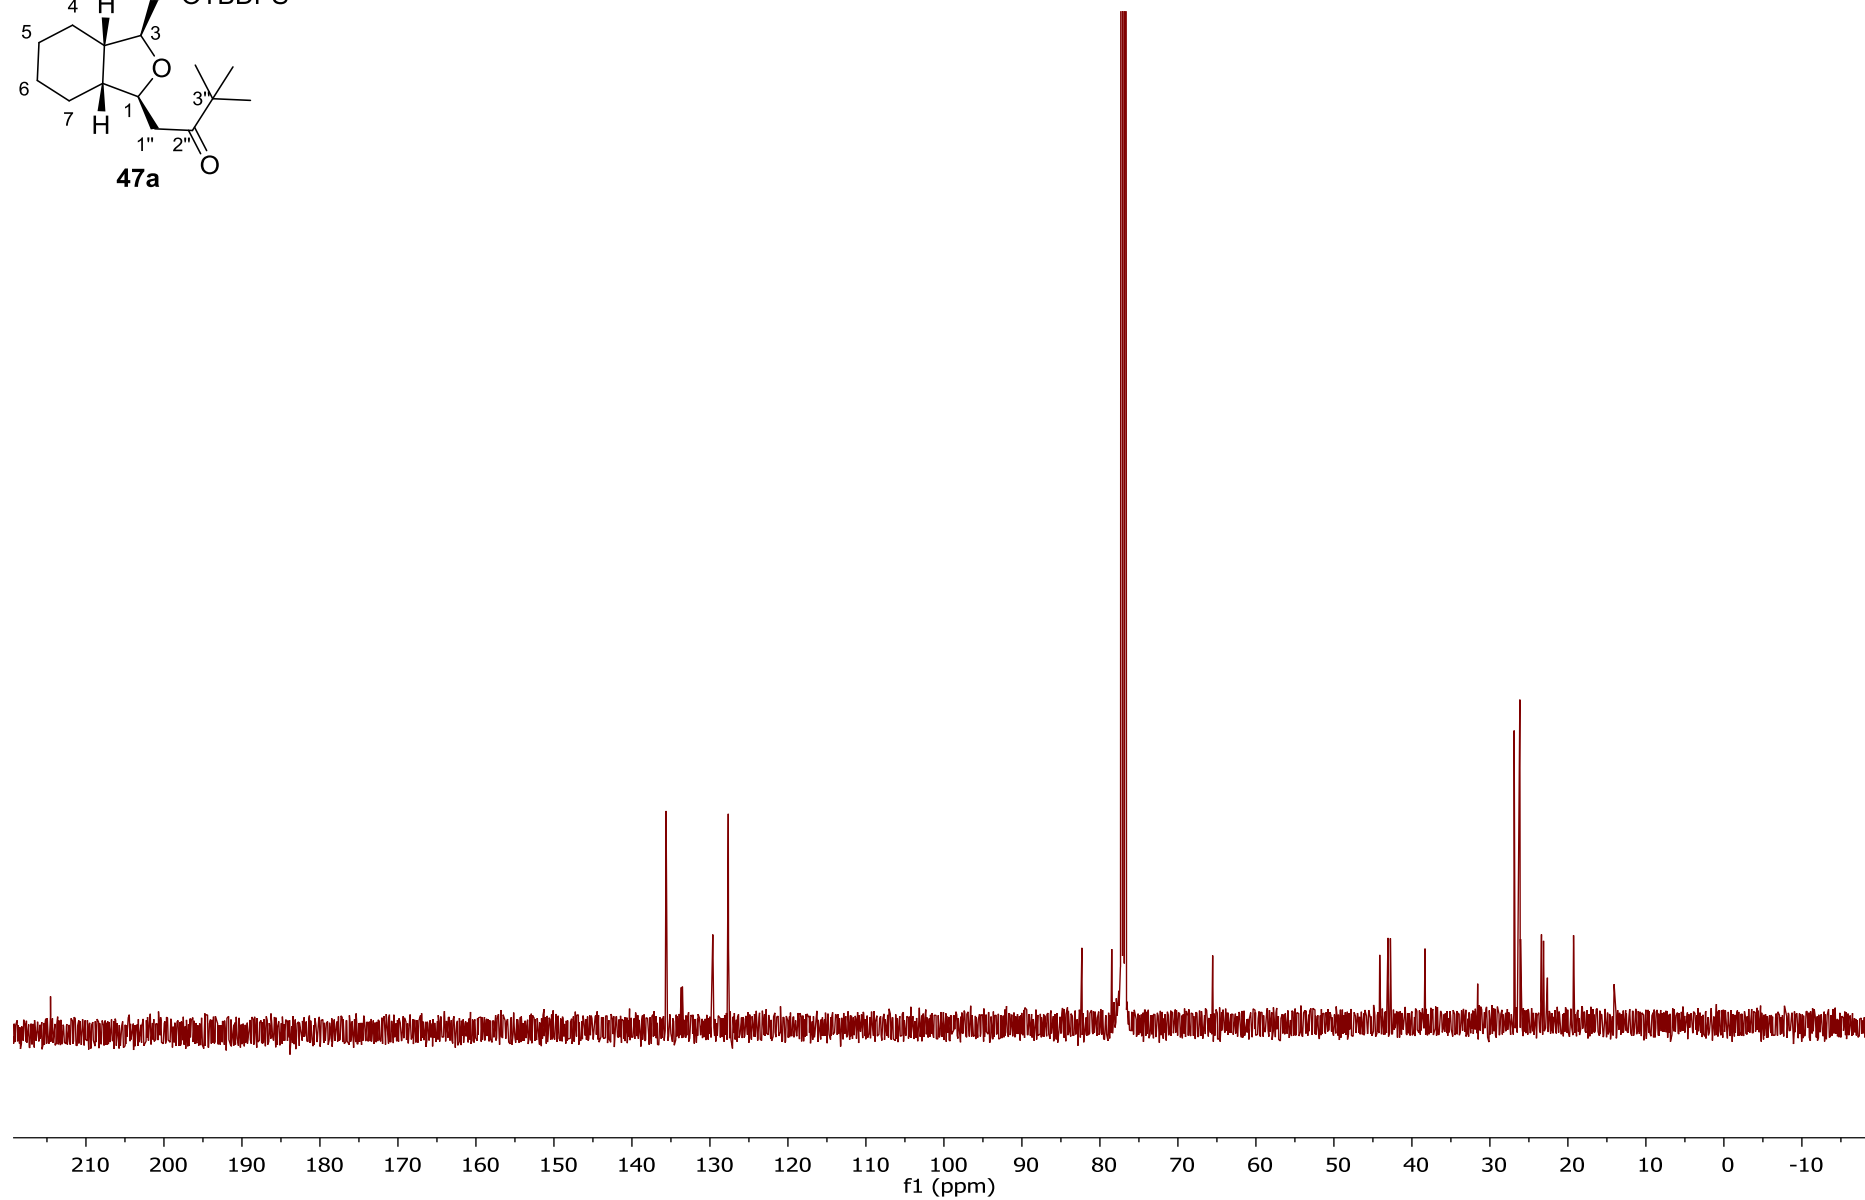

1-((1S,3S,3aS,7aR)-3-(hydroxymethyl)octahydroisobenzofuran-1-yl)-3,3-dimethylbutan-2-one **47**

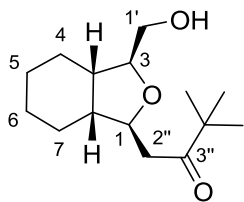

**47**

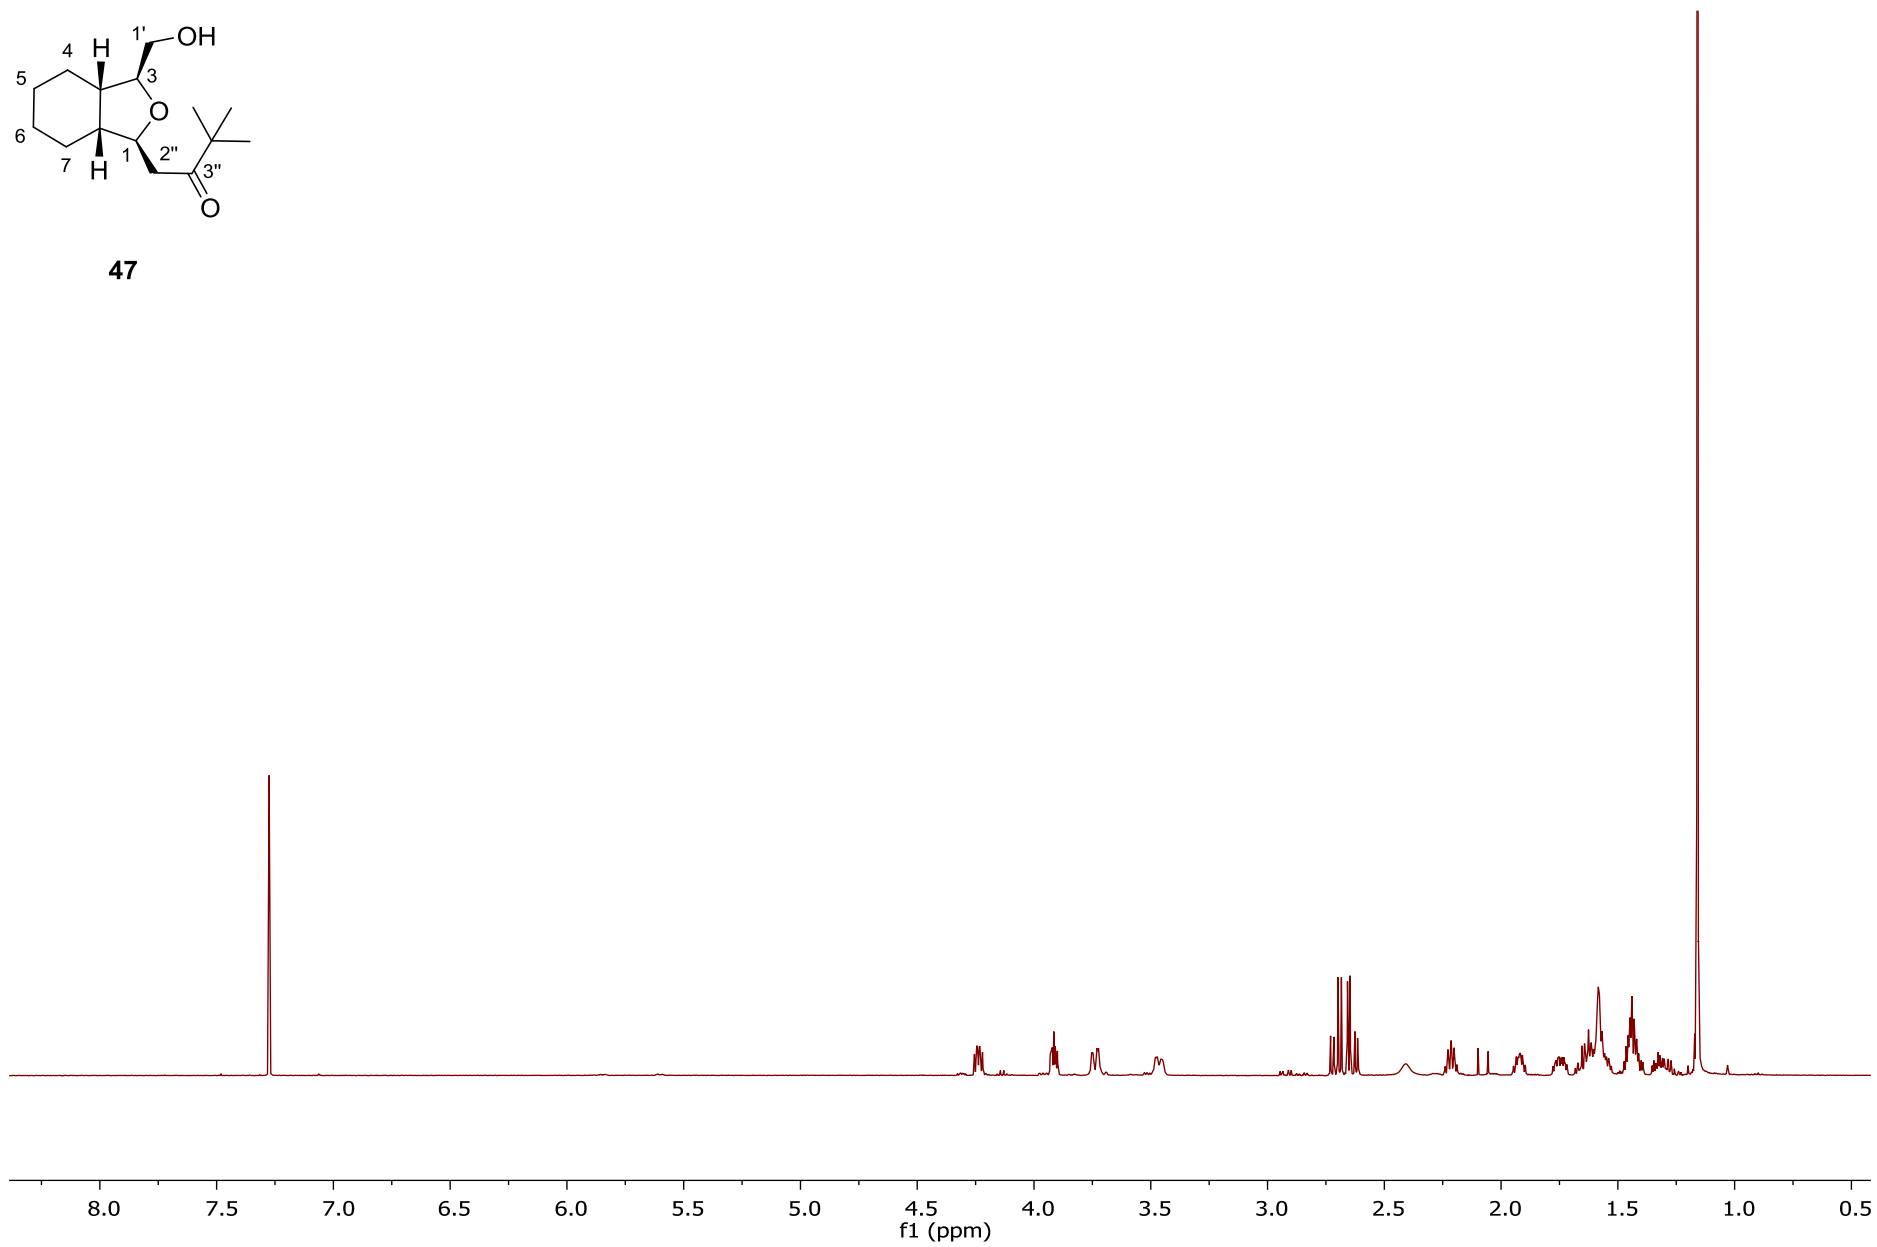

1-((1S,3S,3aS,7aR)-3-(hydroxymethyl)octahydroisobenzofuran-1-yl)-3,3-dimethylbutan-2-one **47**

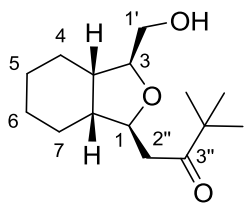

**47**

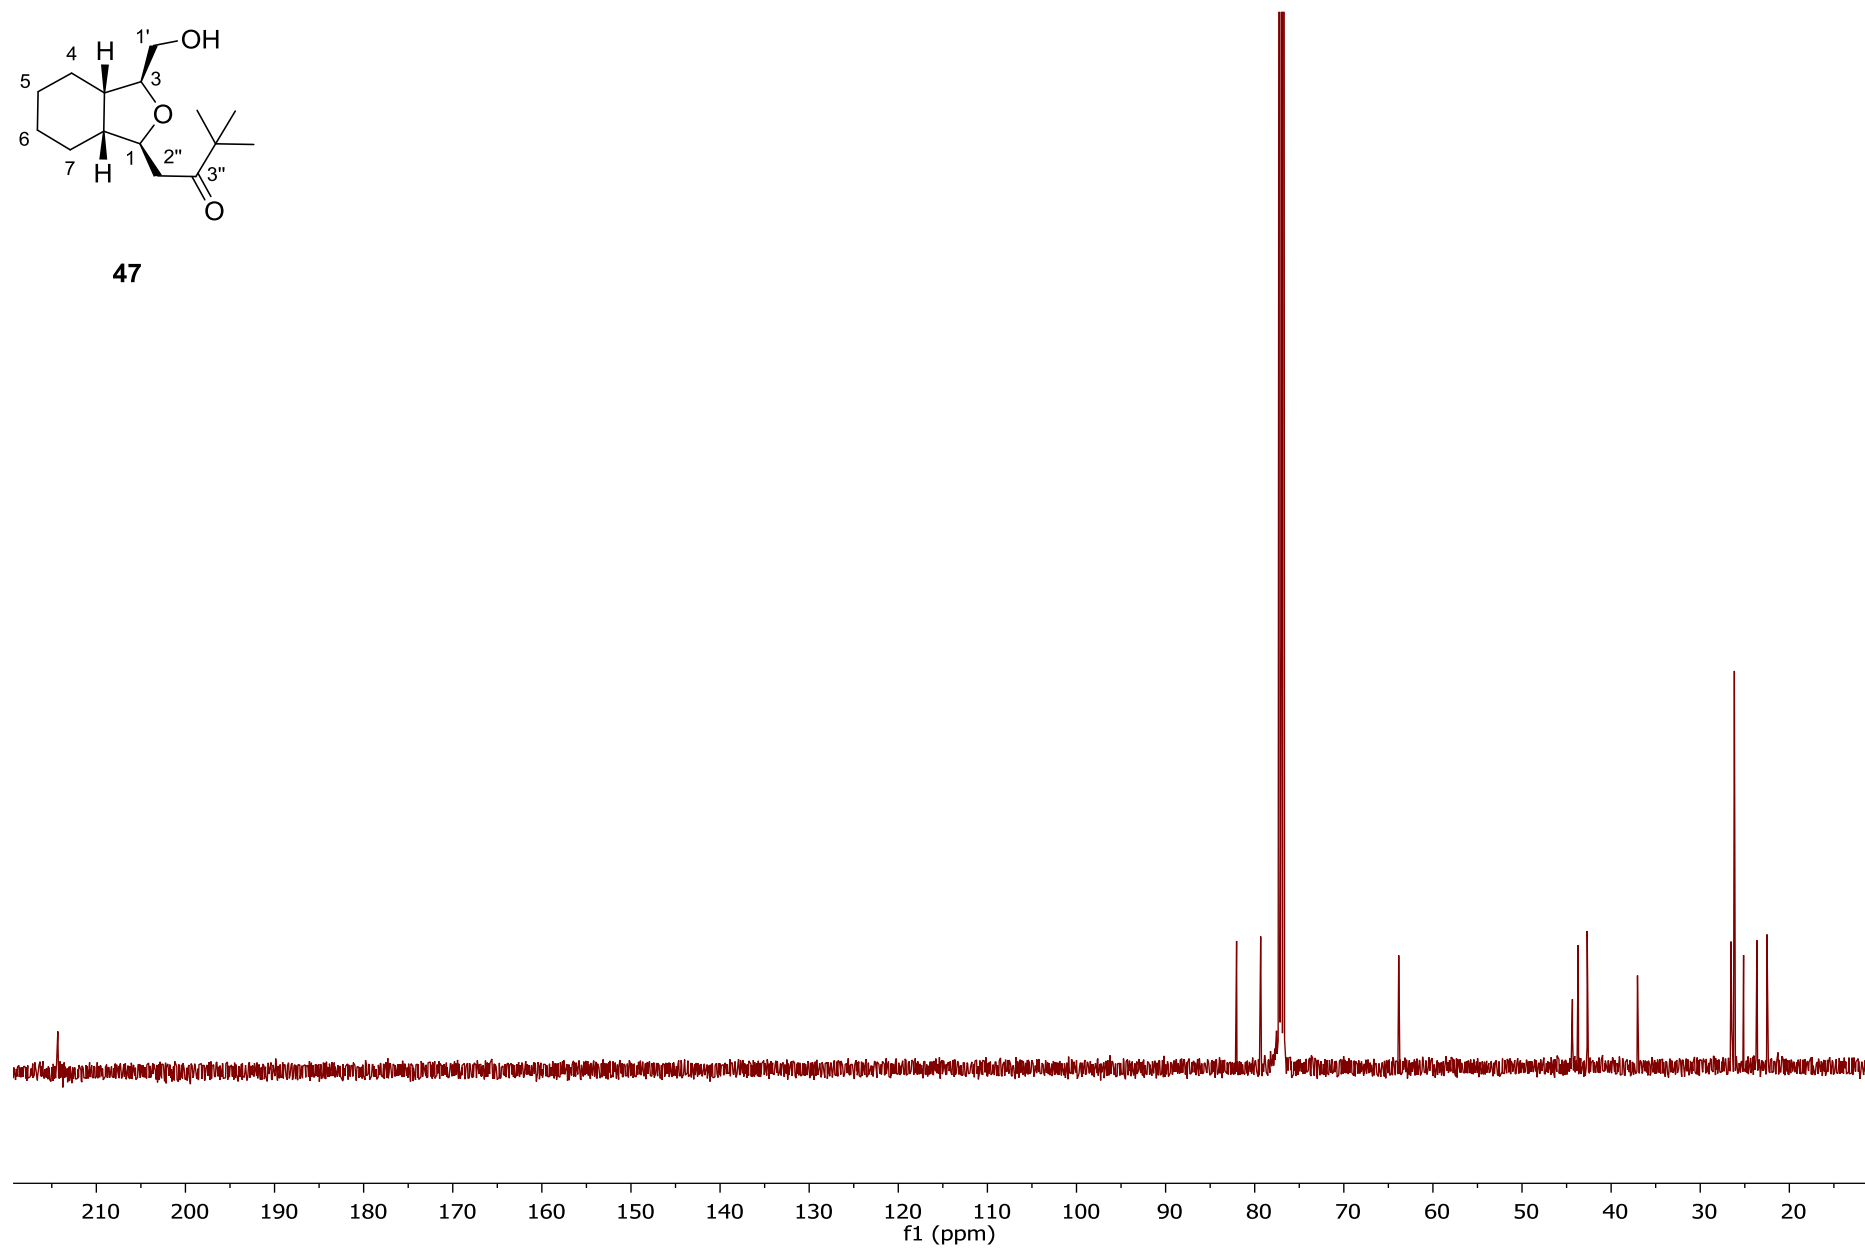



1-((1S,3S,3aS,7aR)-3-((tert-butyldiphenylsilyloxy)methyl)-1,3,3a,4,7,7a-hexahydroisobenzofuran-1-yl)-3,3-dimethylbutan-2-one **48a**

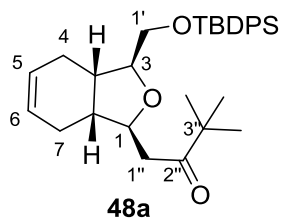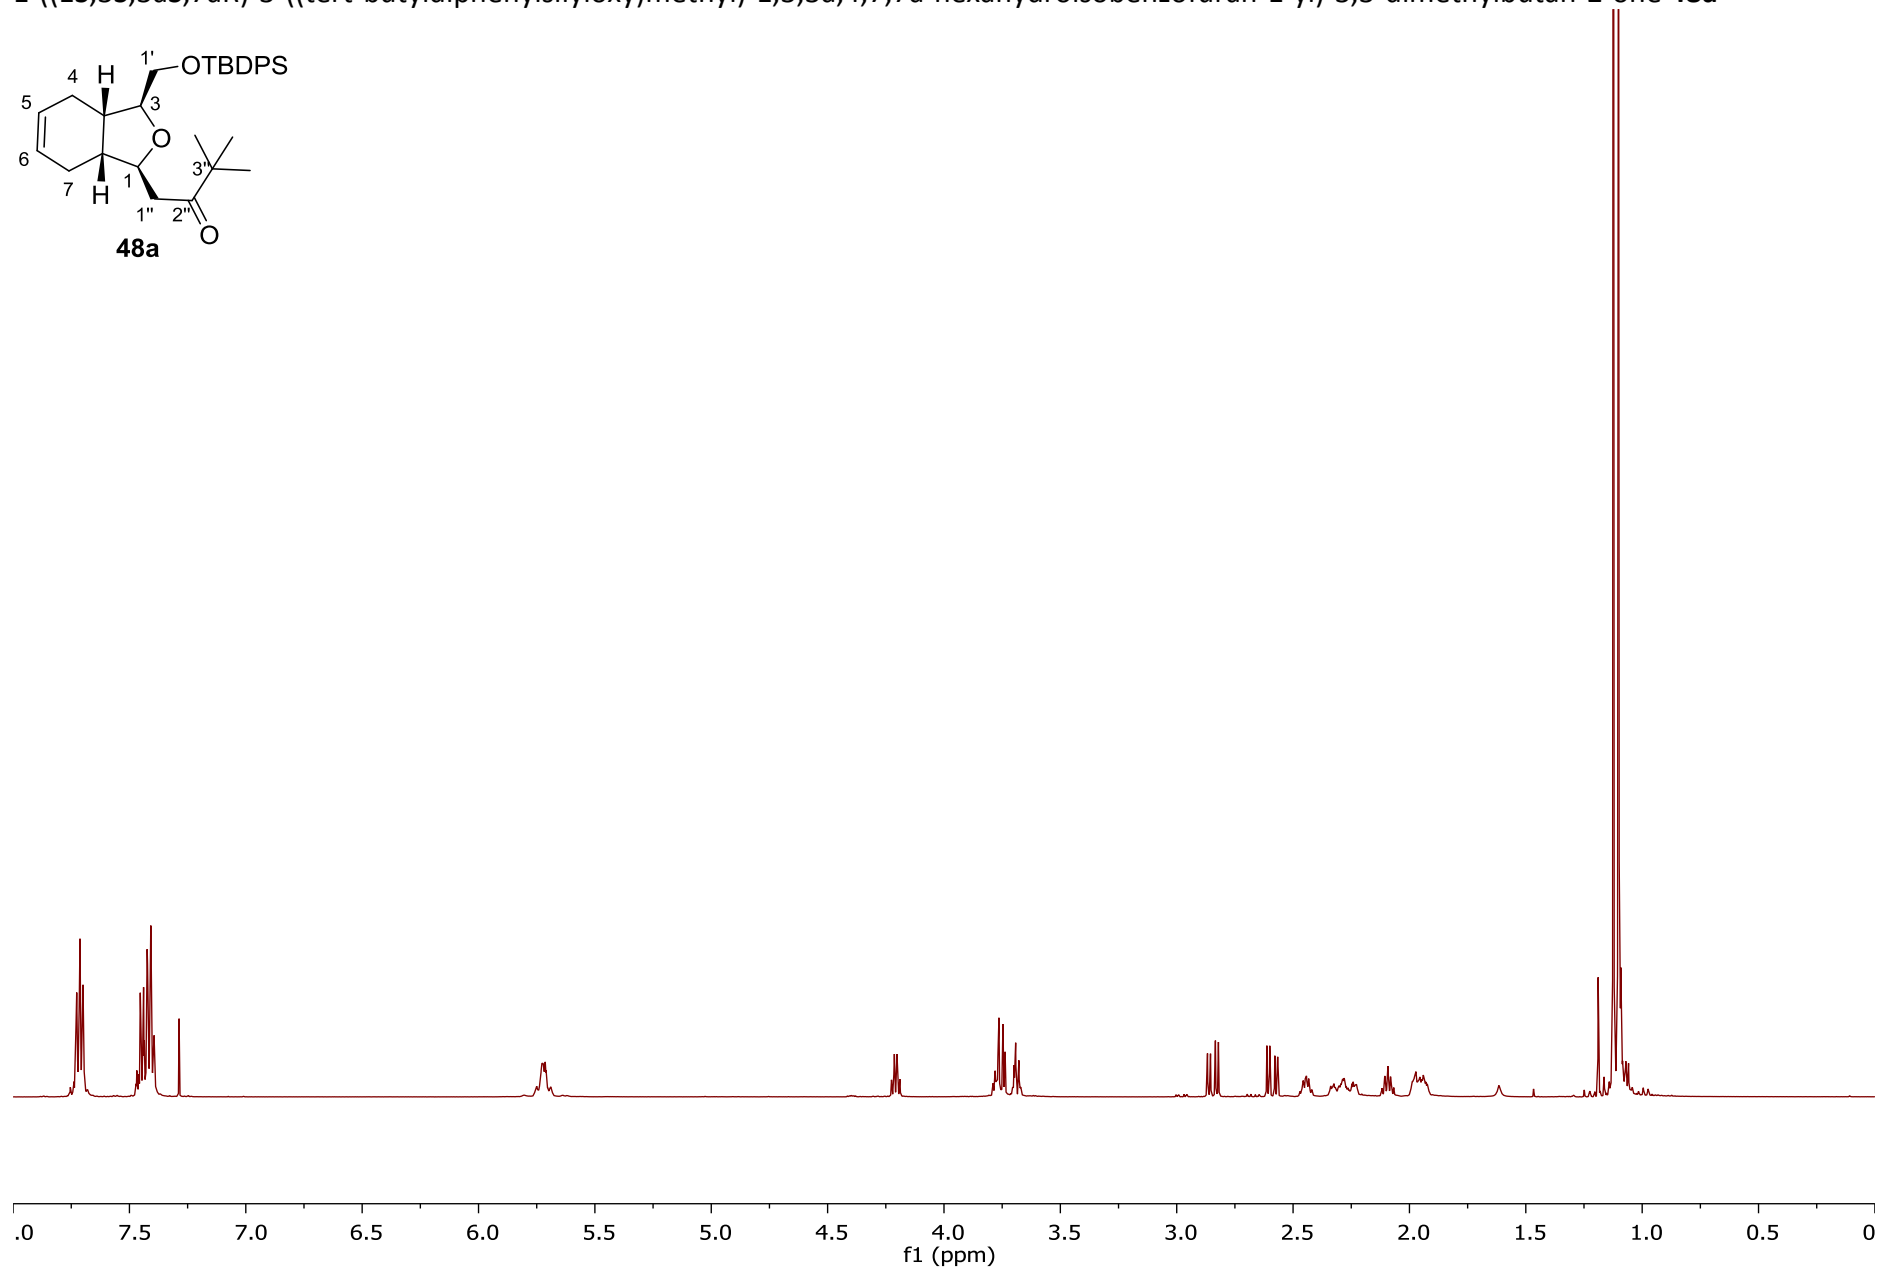

1-((1S,3S,3aS,7aR)-3-((tert-butyl-diphenylsilyloxy)methyl)-1,3,3a,4,7,7a-hexahydroisobenzofuran-1-yl)-3,3-dimethylbutan-2-one **48a**

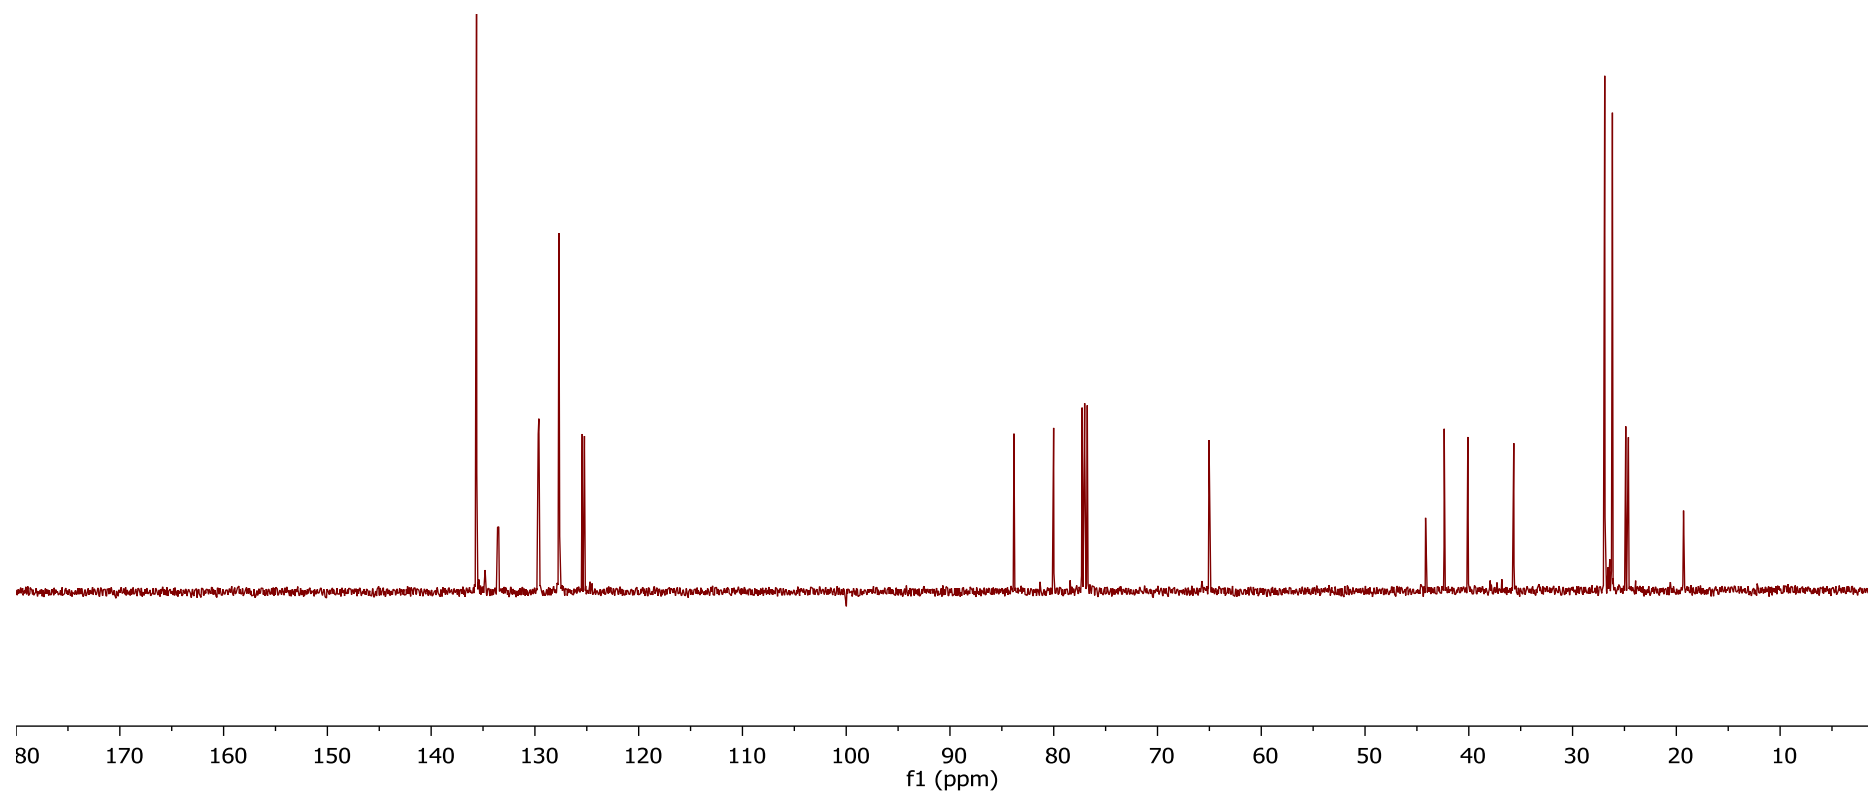

1-[(1S,3S,3aS,7aR)-3-(hydroxymethyl)-1,3,3a,4,7,7a-hexahydro-2-benzofuran-1-yl]-3,3-dimethylbutan-2-one **48**

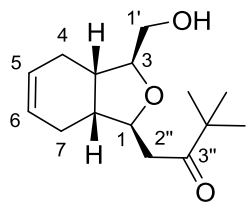

**48**

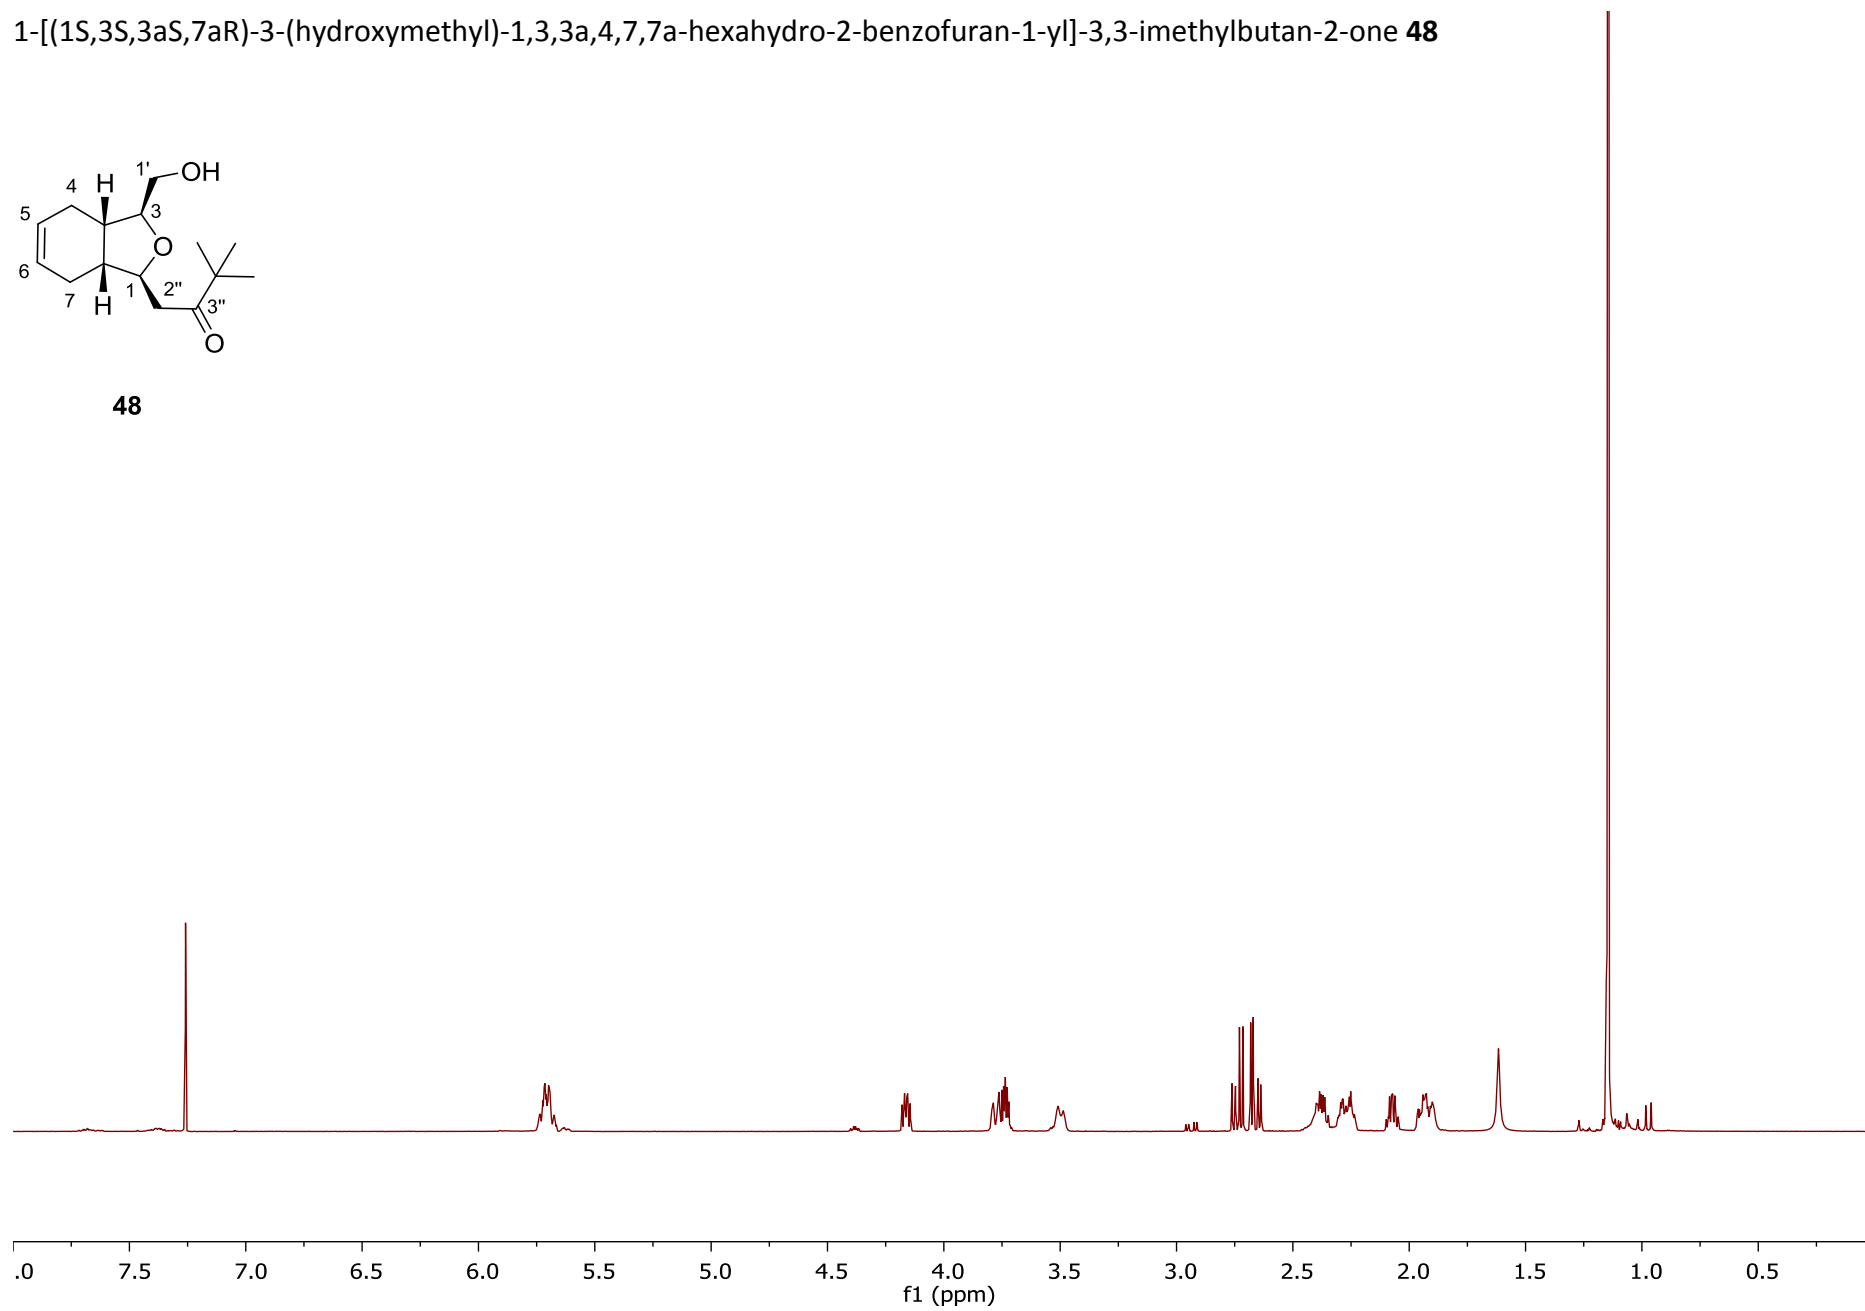

1-[(1S,3S,3aS,7aR)-3-(hydroxymethyl)-1,3,3a,4,7,7a-hexahydro-2-benzofuran-1-yl]-3,3-dimethylbutan-2-one **48**

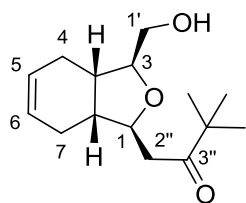

**48**

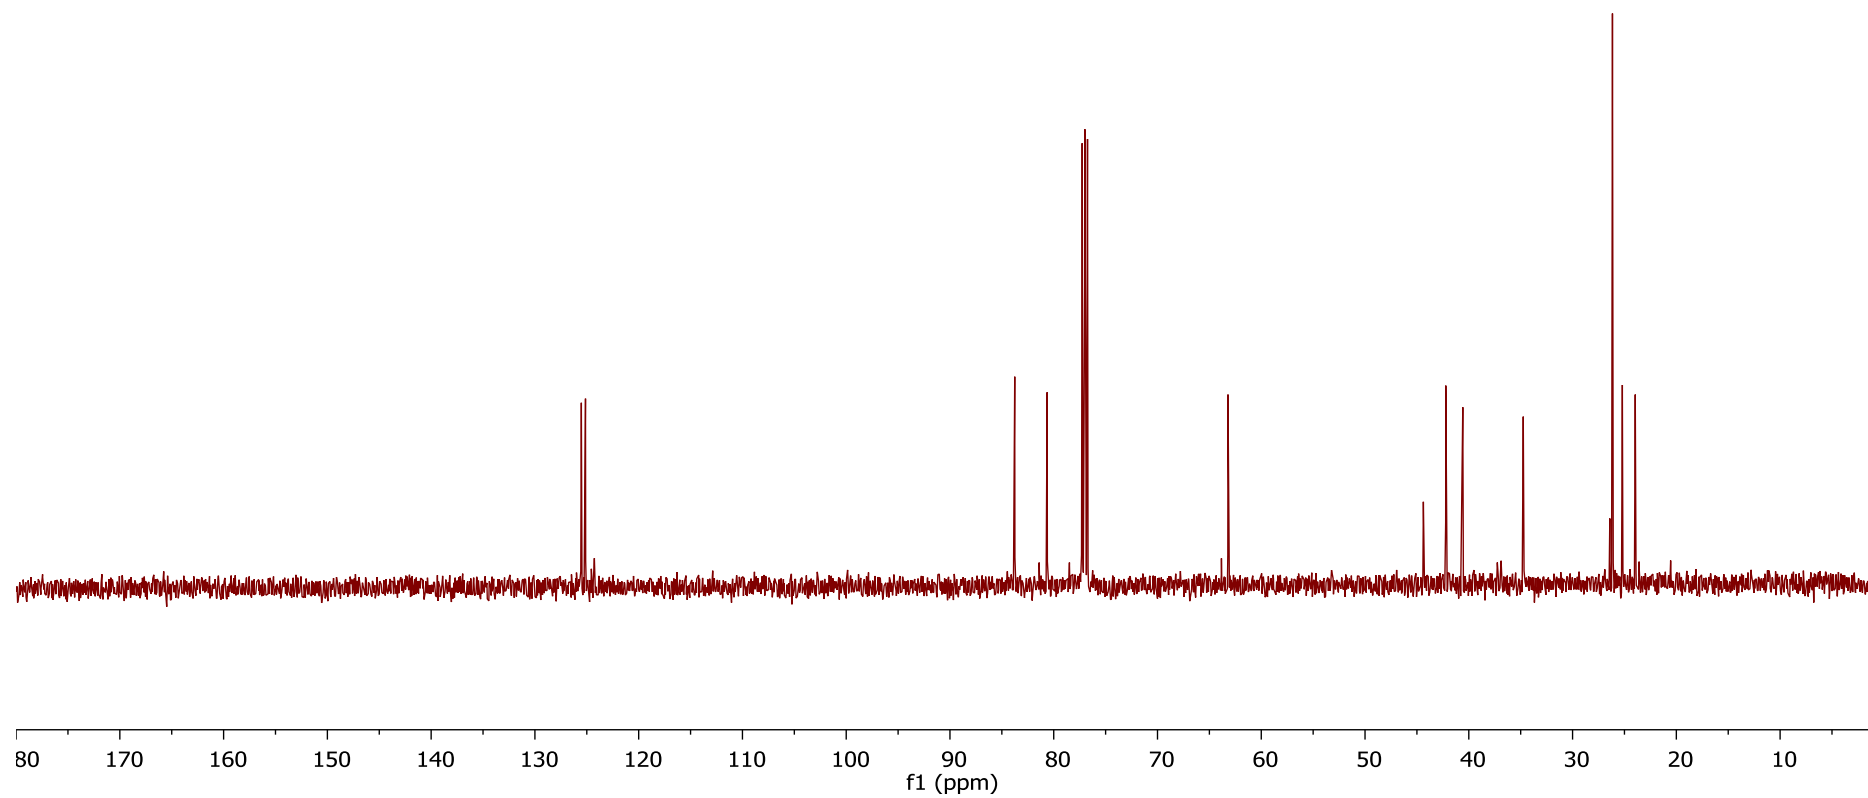

2-[(1R,3S,3aS,7aR)-3-[[*tert*-butyldiphenylsilyl]oxy]methyl]-1,3,3a,4,7,7a-hexahydro-2-benzofuran-1-yl]-2-methylpropan-1-ol **49a**

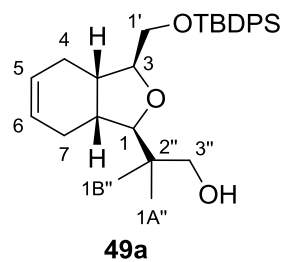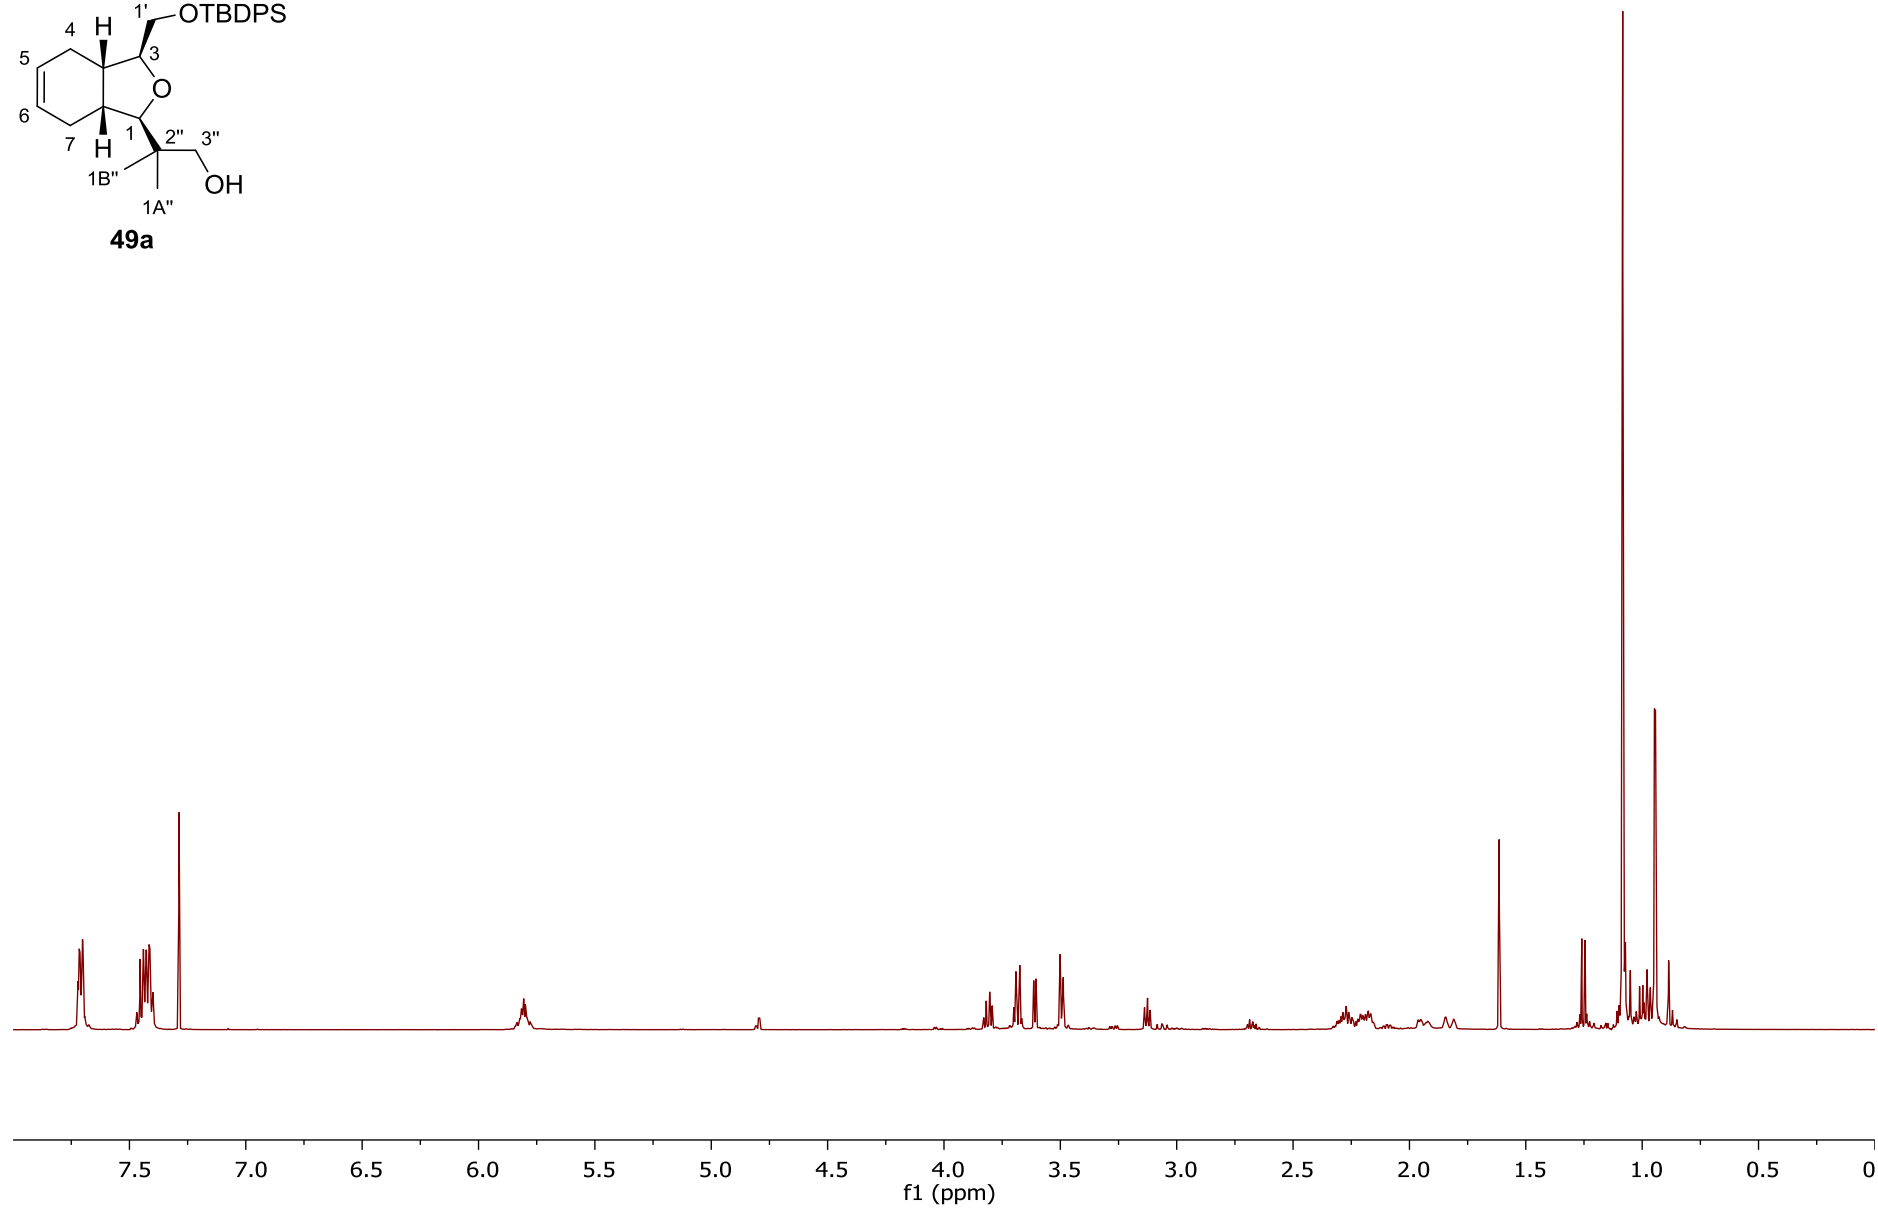

2-[(1R,3S,3aS,7aR)-3-[[*tert*-butyldiphenylsilyl]oxy]methyl]-1,3,3a,4,7,7a-hexahydro-2-benzofuran-1-yl]-2-methylpropan-1-ol **49a**

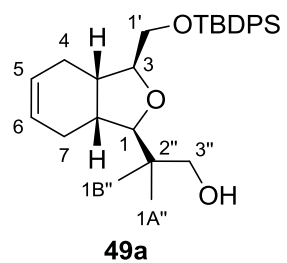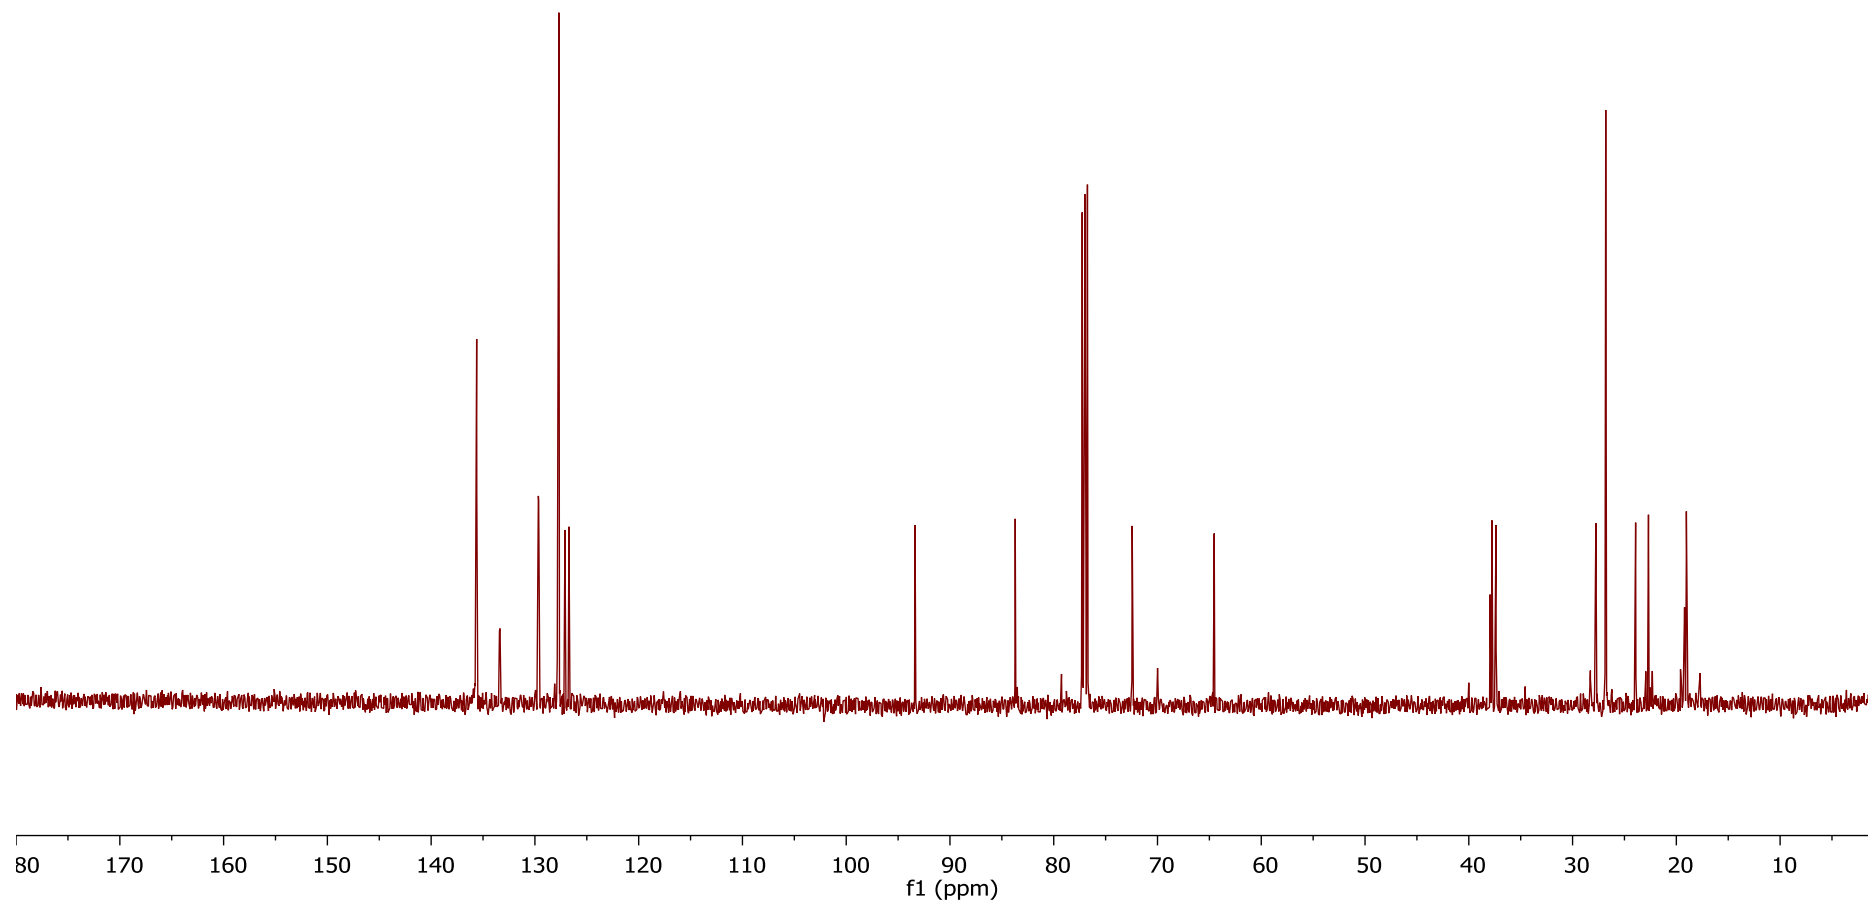

2-[(1R,3S,3aS,7aR)-3-(hydroxymethyl)-1,3,3a,4,7,7a-hexahydro-2-benzofuran-1-yl]-2-methylpropan-1-ol **49**

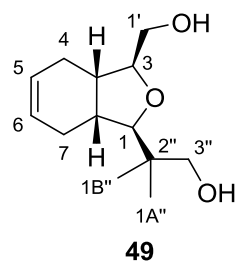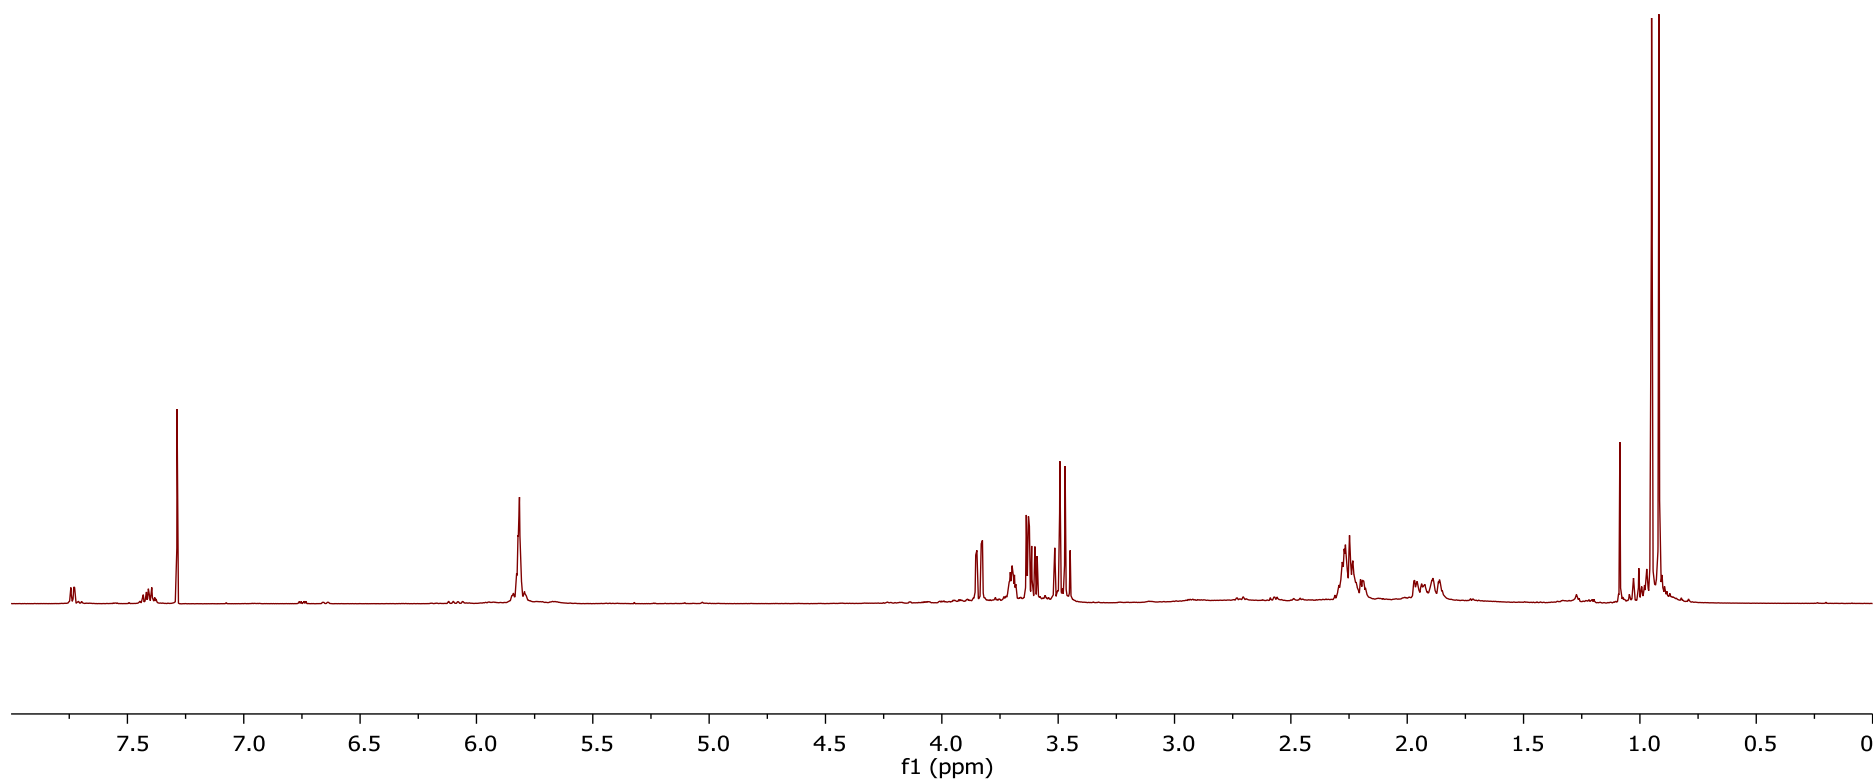

2-[(1R,3S,3aS,7aR)-3-(hydroxymethyl)-1,3,3a,4,7,7a-hexahydro-2-benzofuran-1-yl]-2-methylpropan-1-ol **49**

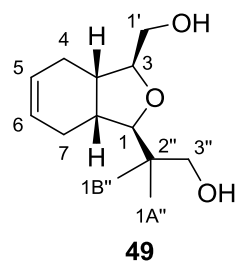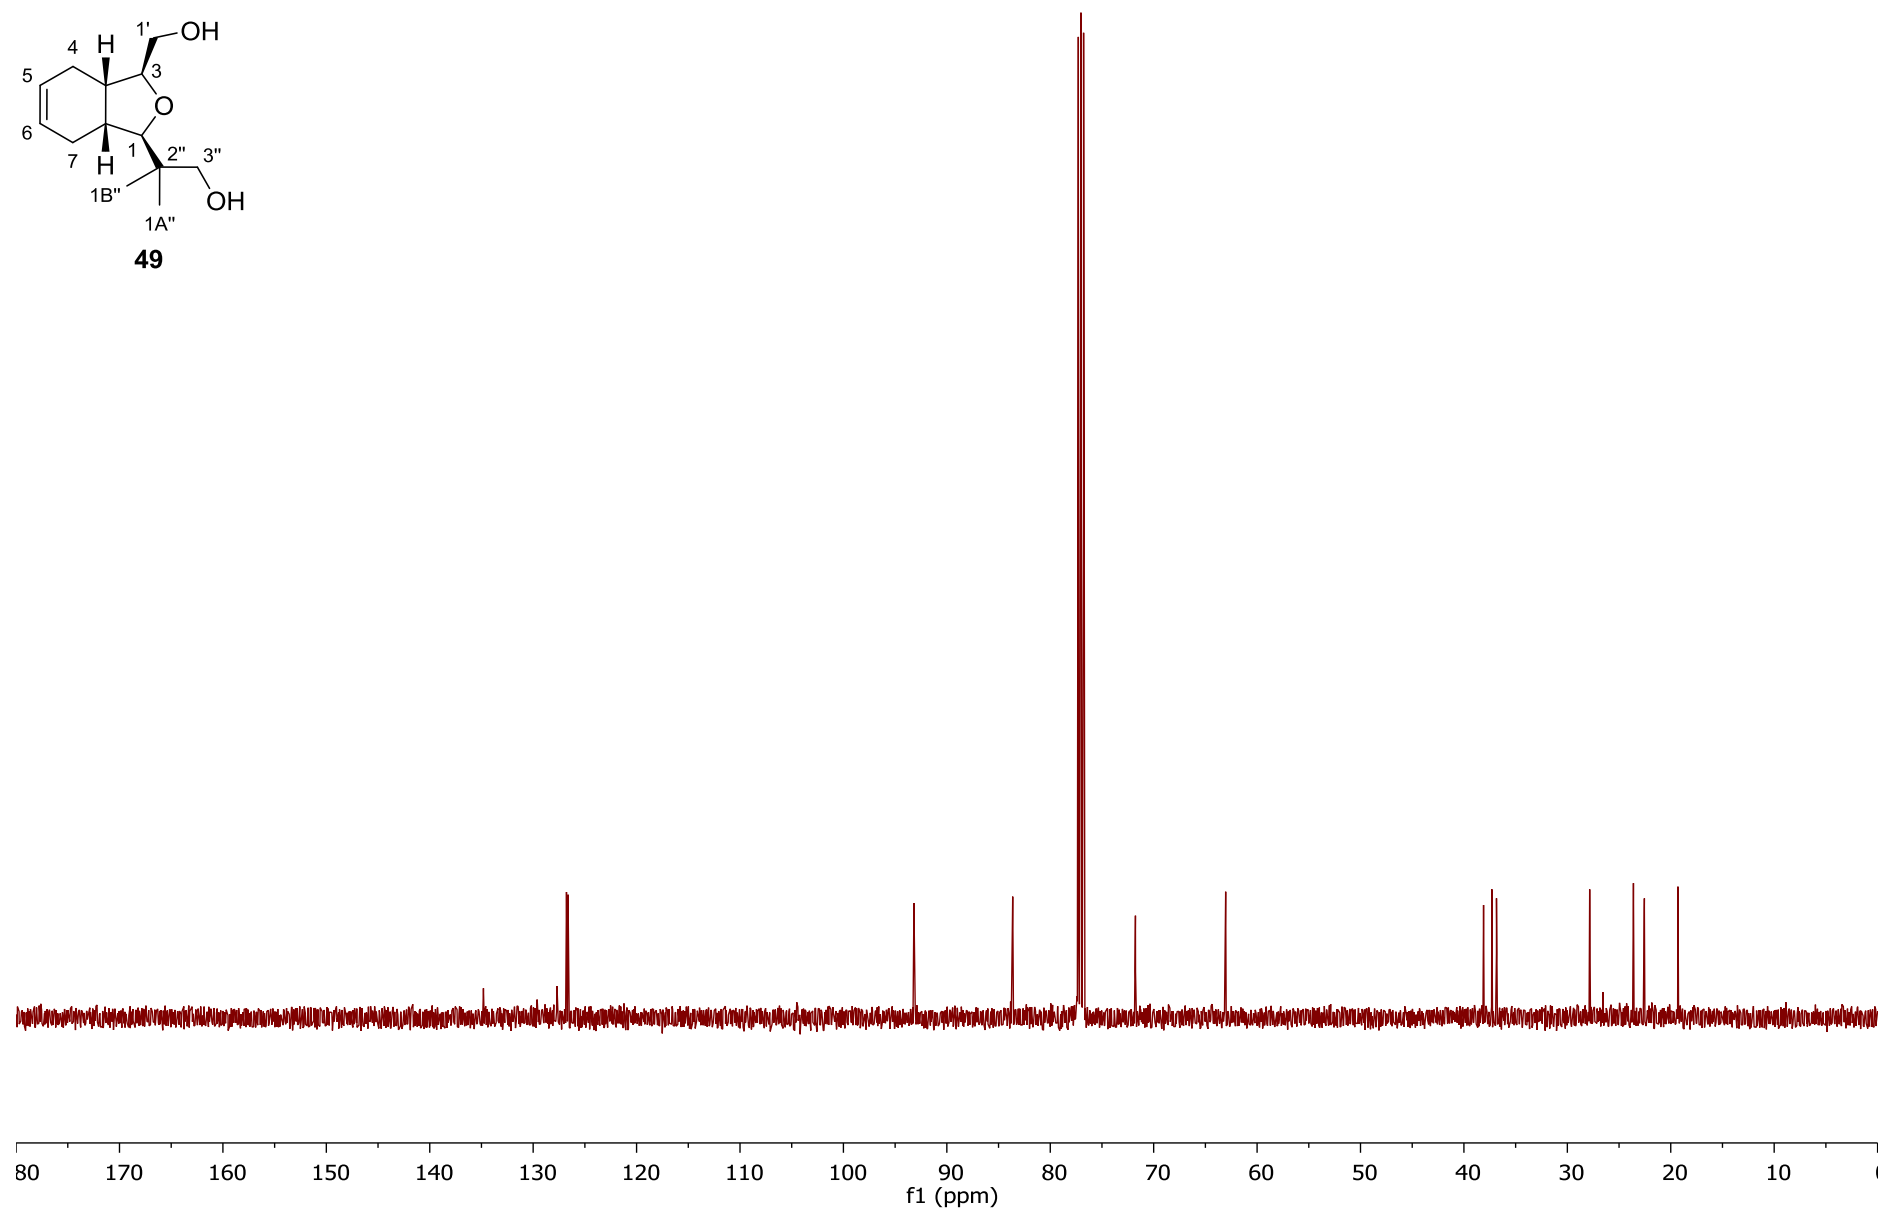



{2-[(1R,3S,3aS,7aR)-3-[[*tert*-Butyldiphenylsilyl]oxy]methyl]-1,3,3a,4,7,7a-hexahydro-2-benzofuran-1-yl]-2-methylpropyl}(benzyl)amine **50**

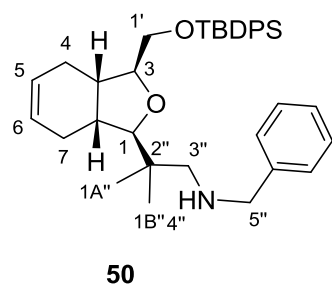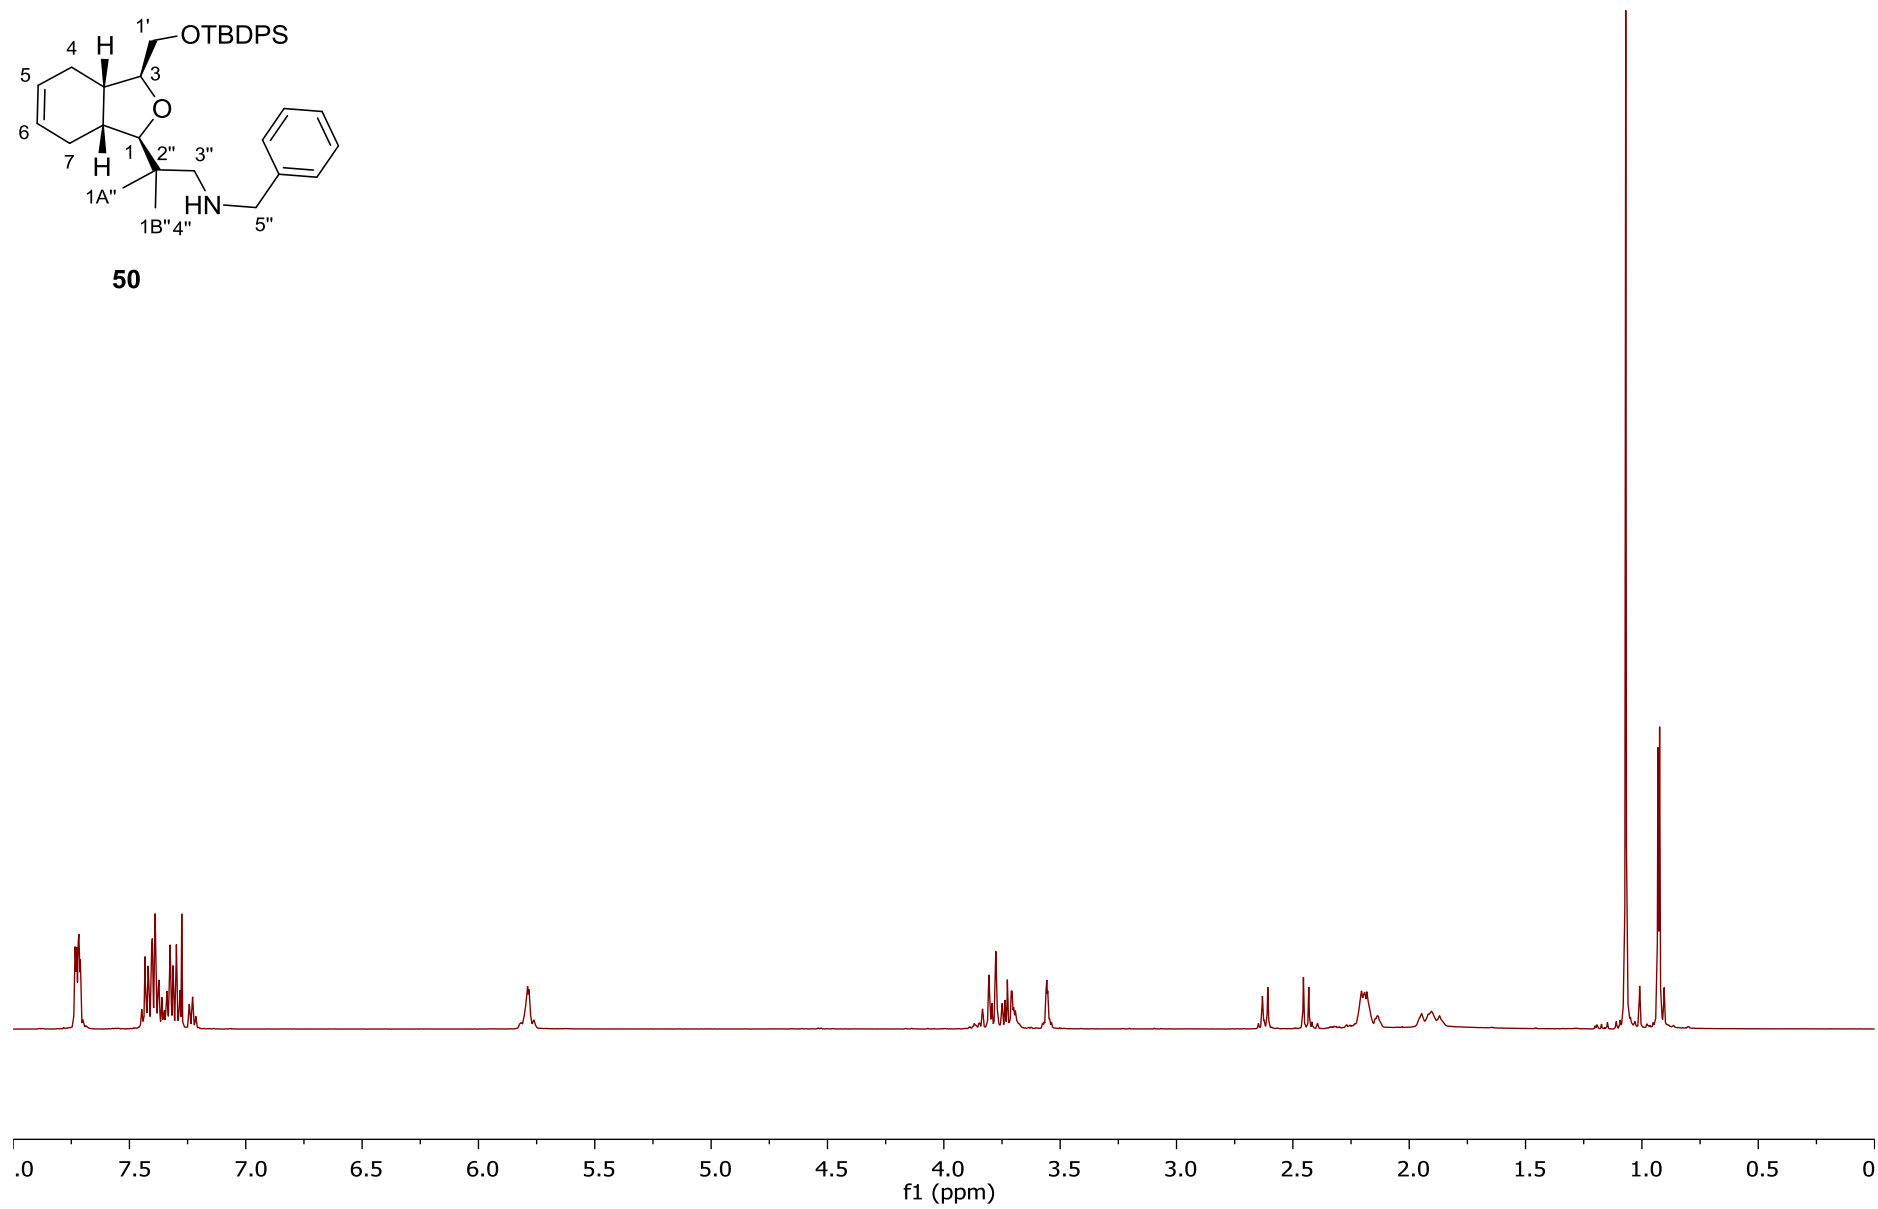

{2-[(1R,3S,3aS,7aR)-3-[[*tert*-Butyldiphenylsilyl]oxy]methyl]-1,3,3a,4,7,7a-hexahydro-2-benzofuran-1-yl]-2-methylpropyl}(benzyl)amine **50**

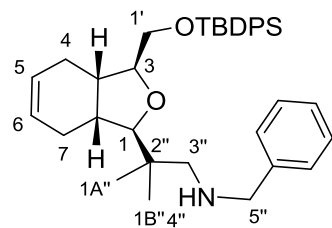

**50**

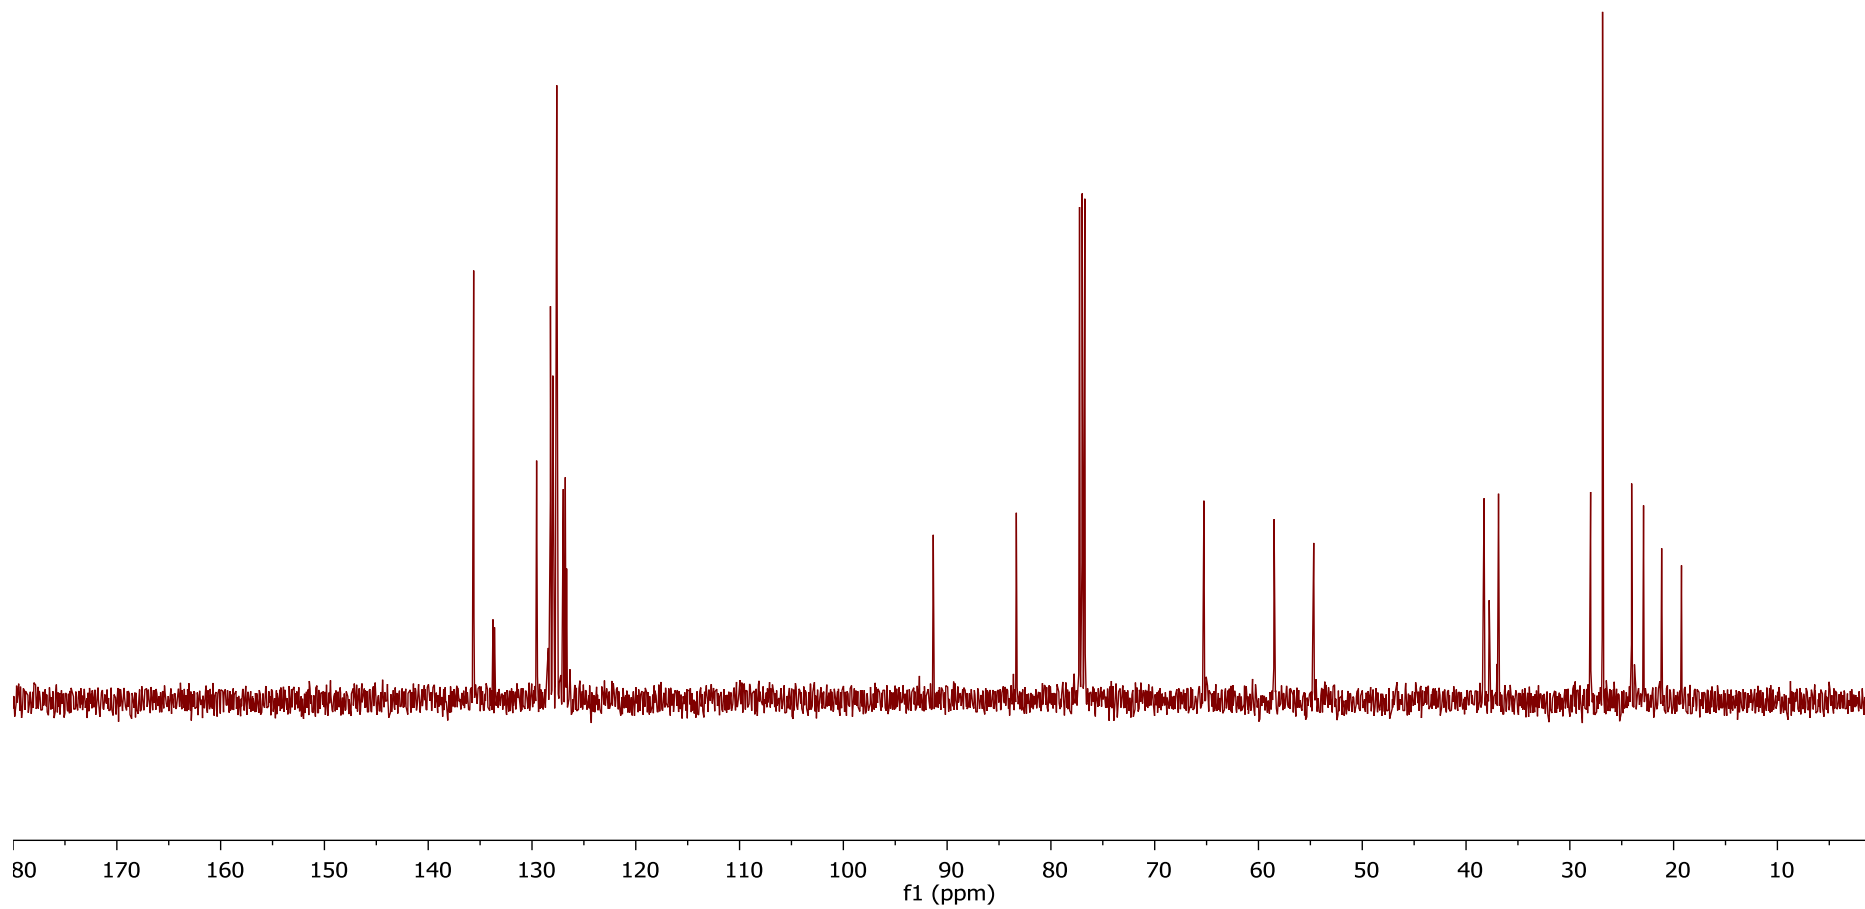

{2-[(1R,3S,3aS,7aR)-3-[[*tert*-Butyldiphenylsilyl]oxy]methyl]-1,3,3a,4,7,7a-hexahydro-2-benzofuran-1-yl]-2-methylpropyl}[(3-methoxyphenyl)methyl]amine **51**

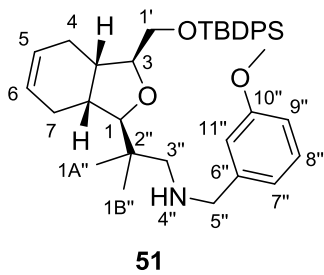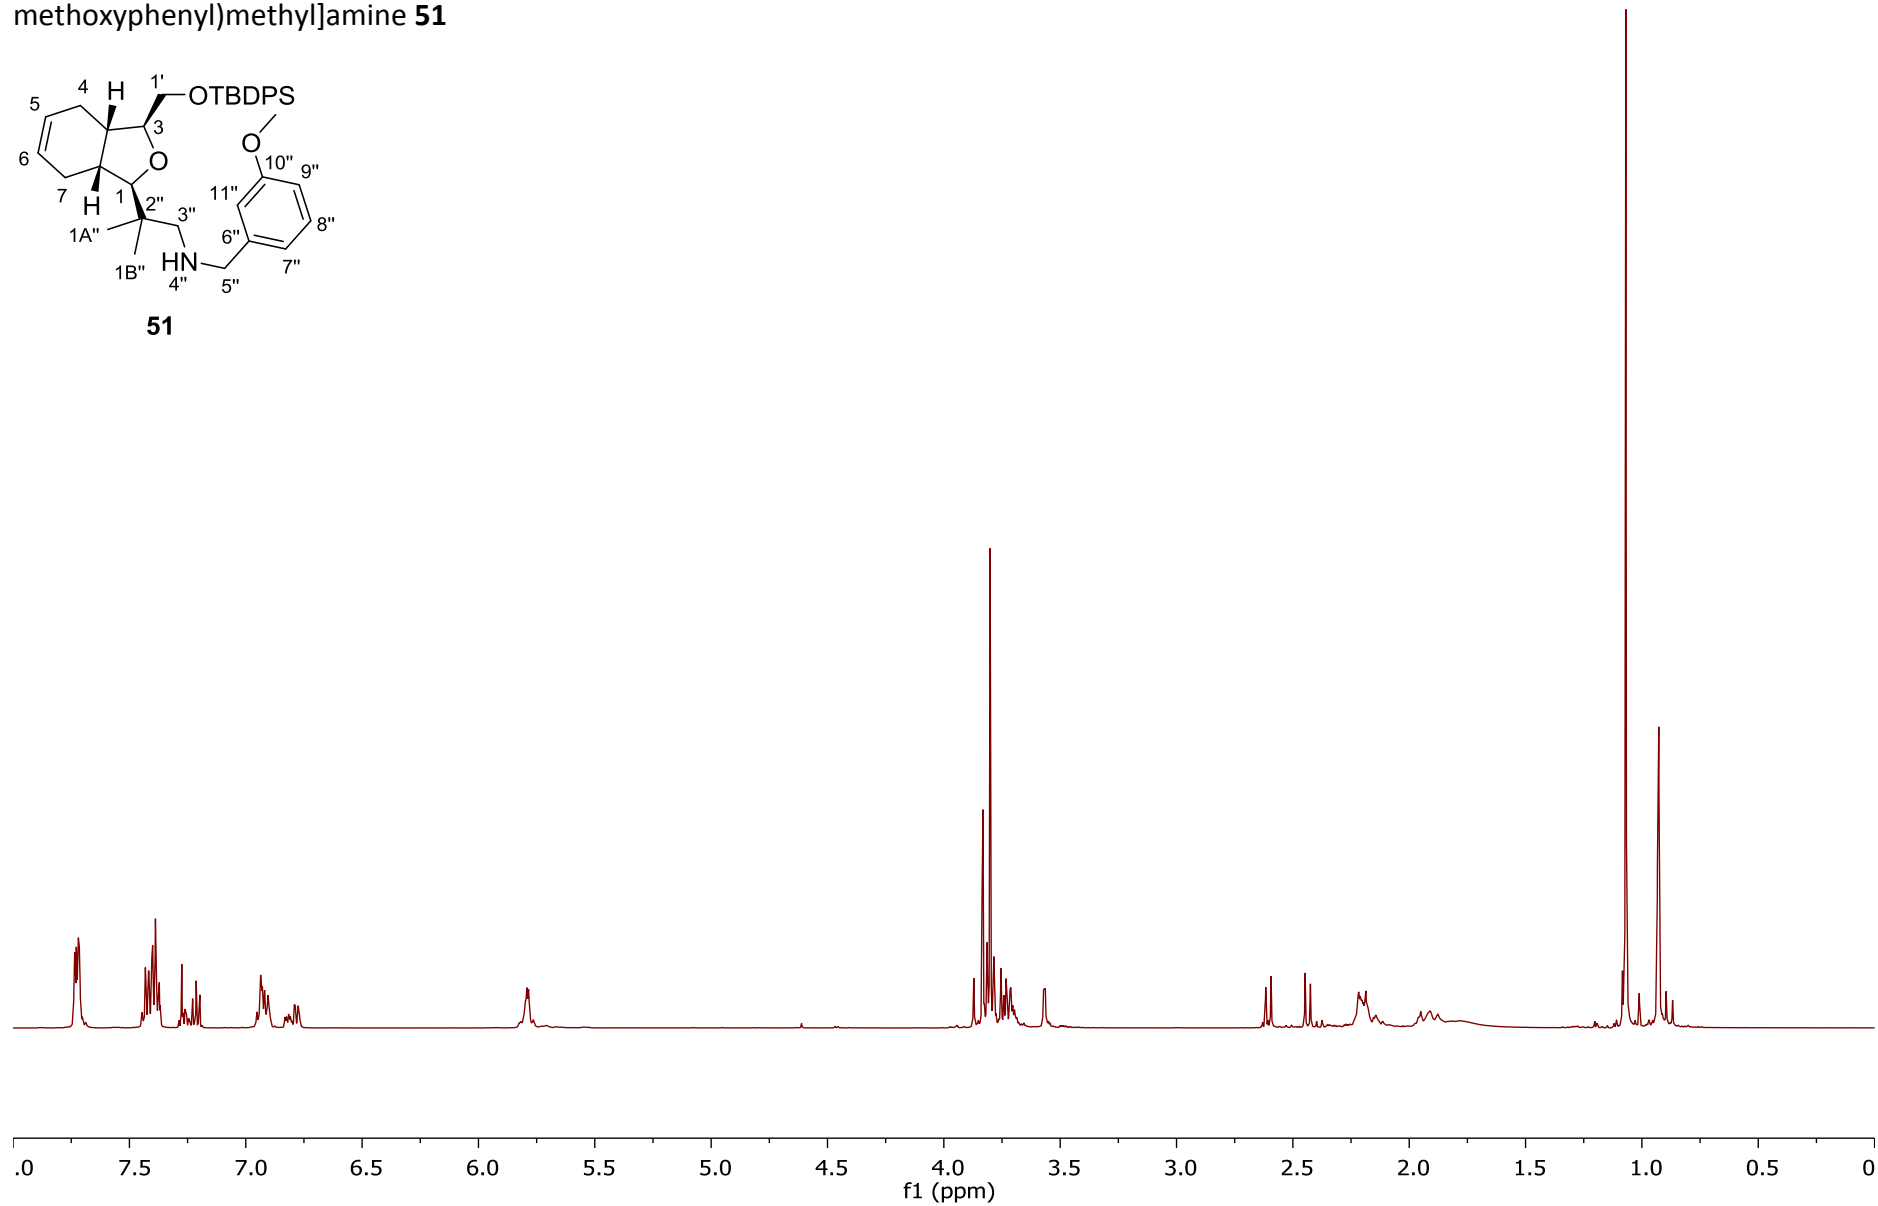

{2-[(1R,3S,3aS,7aR)-3-[[*tert*-Butyldiphenylsilyl]oxy]methyl]-1,3,3a,4,7,7a-hexahydro-2-benzofuran-1-yl]-2-methylpropyl}[(3-methoxyphenyl)methyl]amine **51**

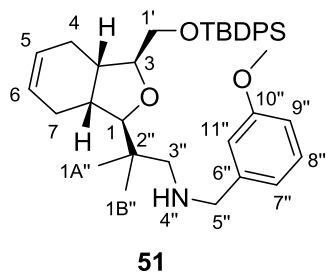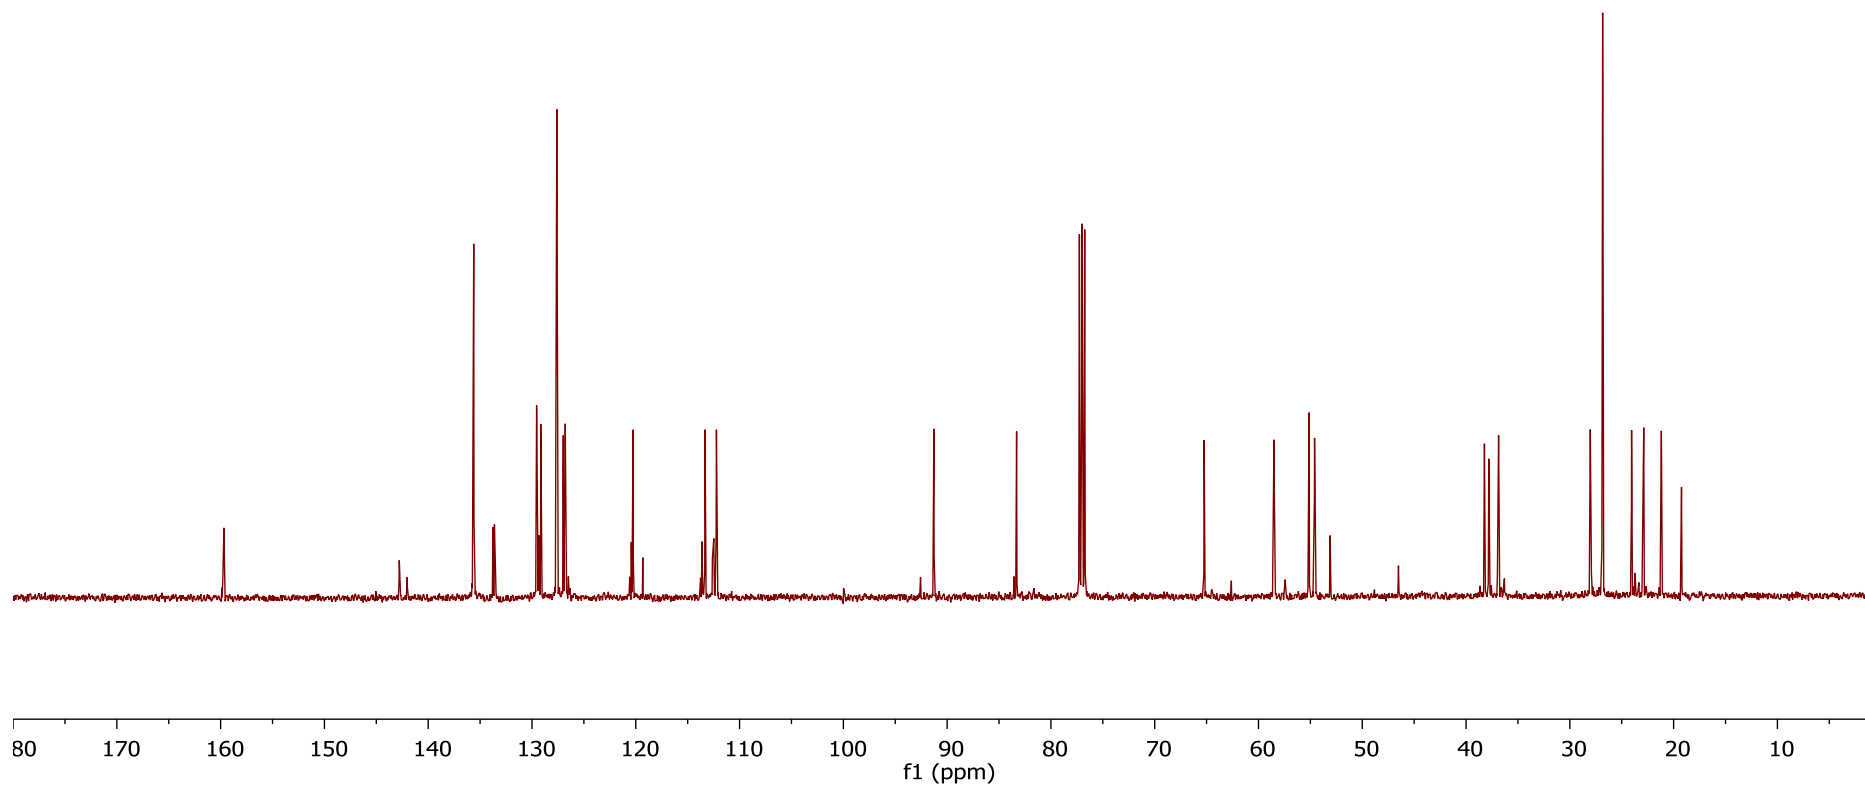

{2-[(1R,3S,3aS,7aR)-3-[[*tert*-Butyldiphenylsilyl]oxy]methyl]-1,3,3a,4,7,7a-hexahydro-2-benzofuran-1-yl]-2-methylpropyl}(methyl)amine **52**

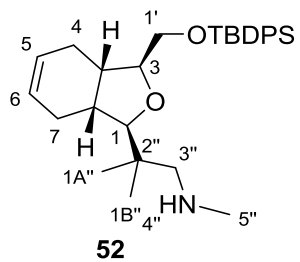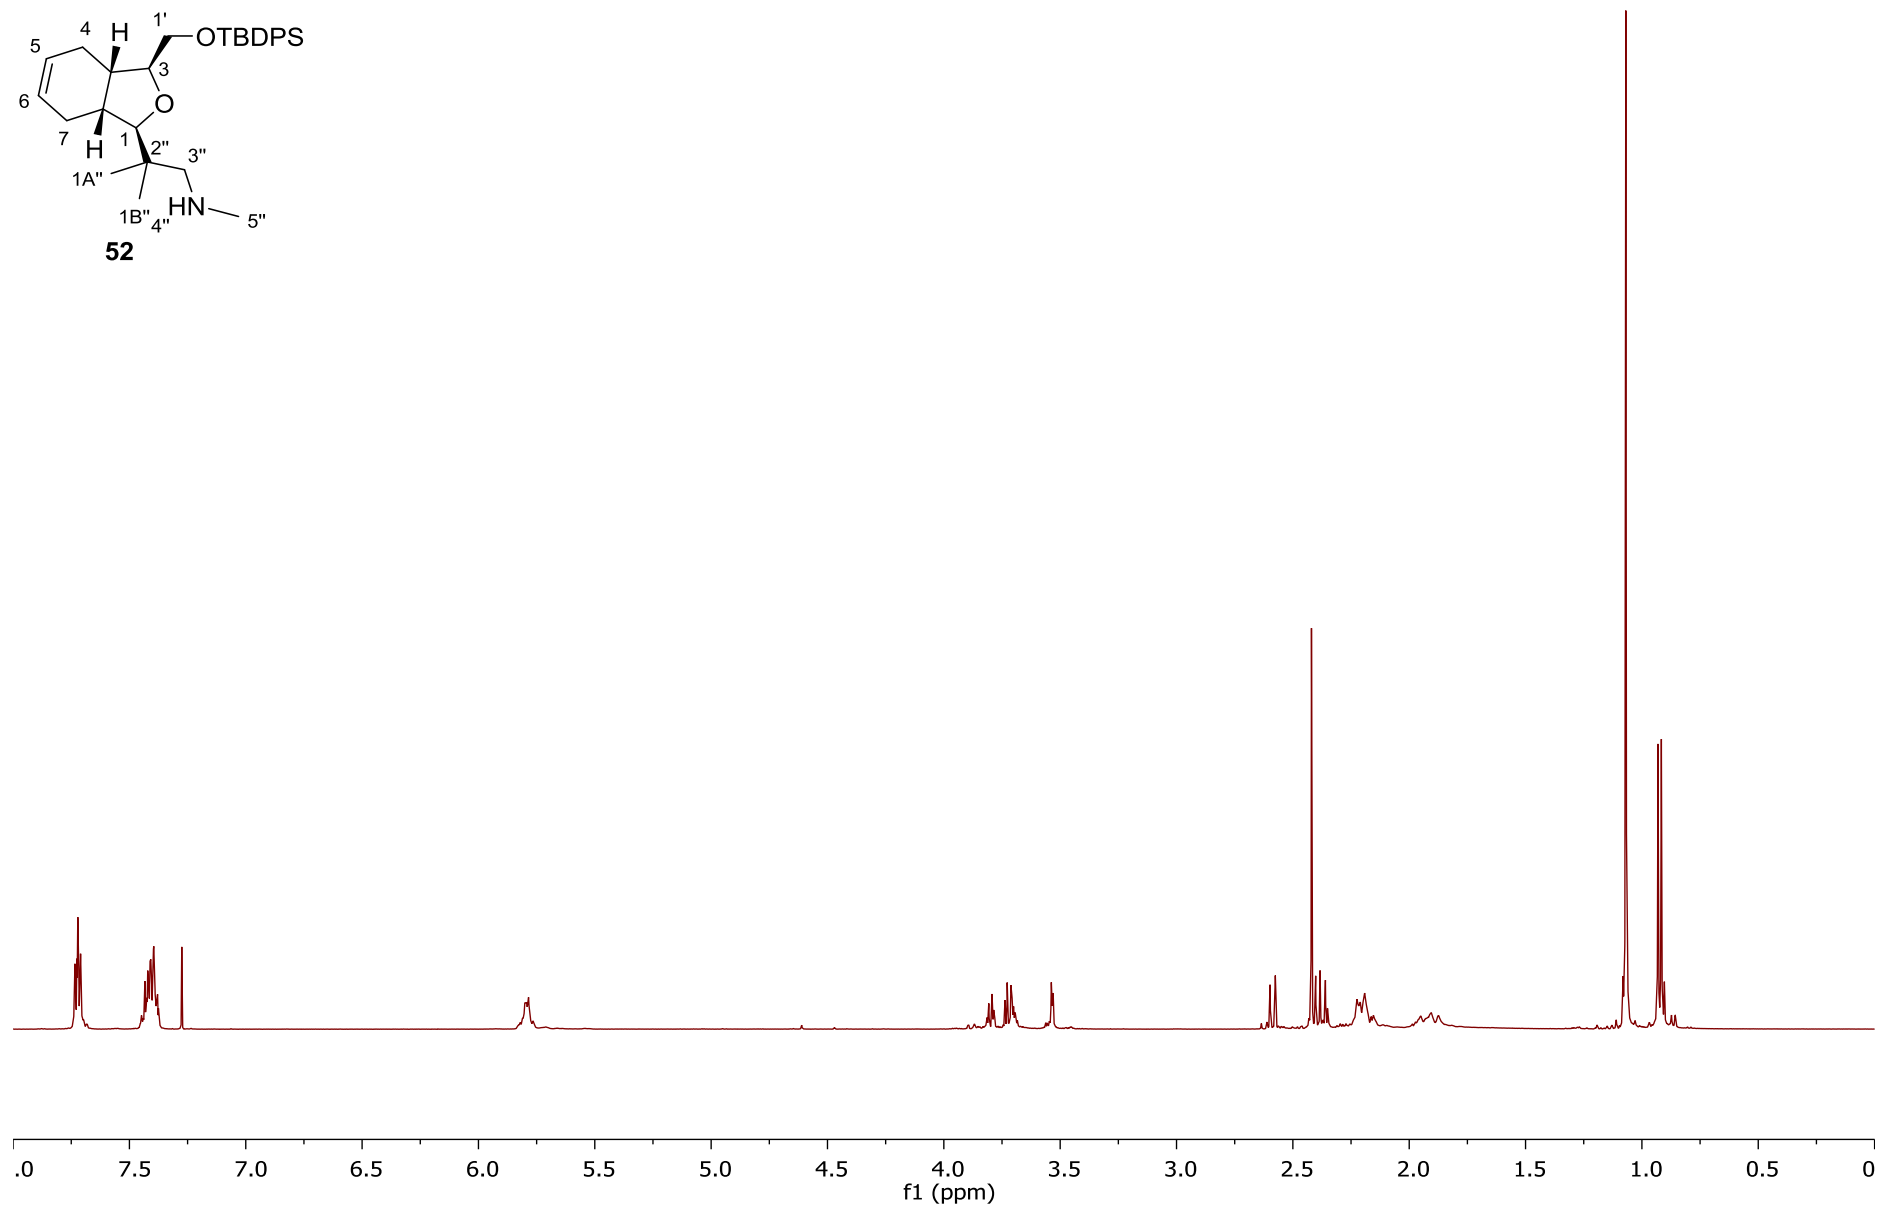

{2-[(1R,3S,3aS,7aR)-3-[[*tert*-Butyldiphenylsilyl]oxy]methyl]-1,3,3a,4,7,7a-hexahydro-2-benzofuran-1-yl]-2-methylpropyl}(methyl)amine **52**

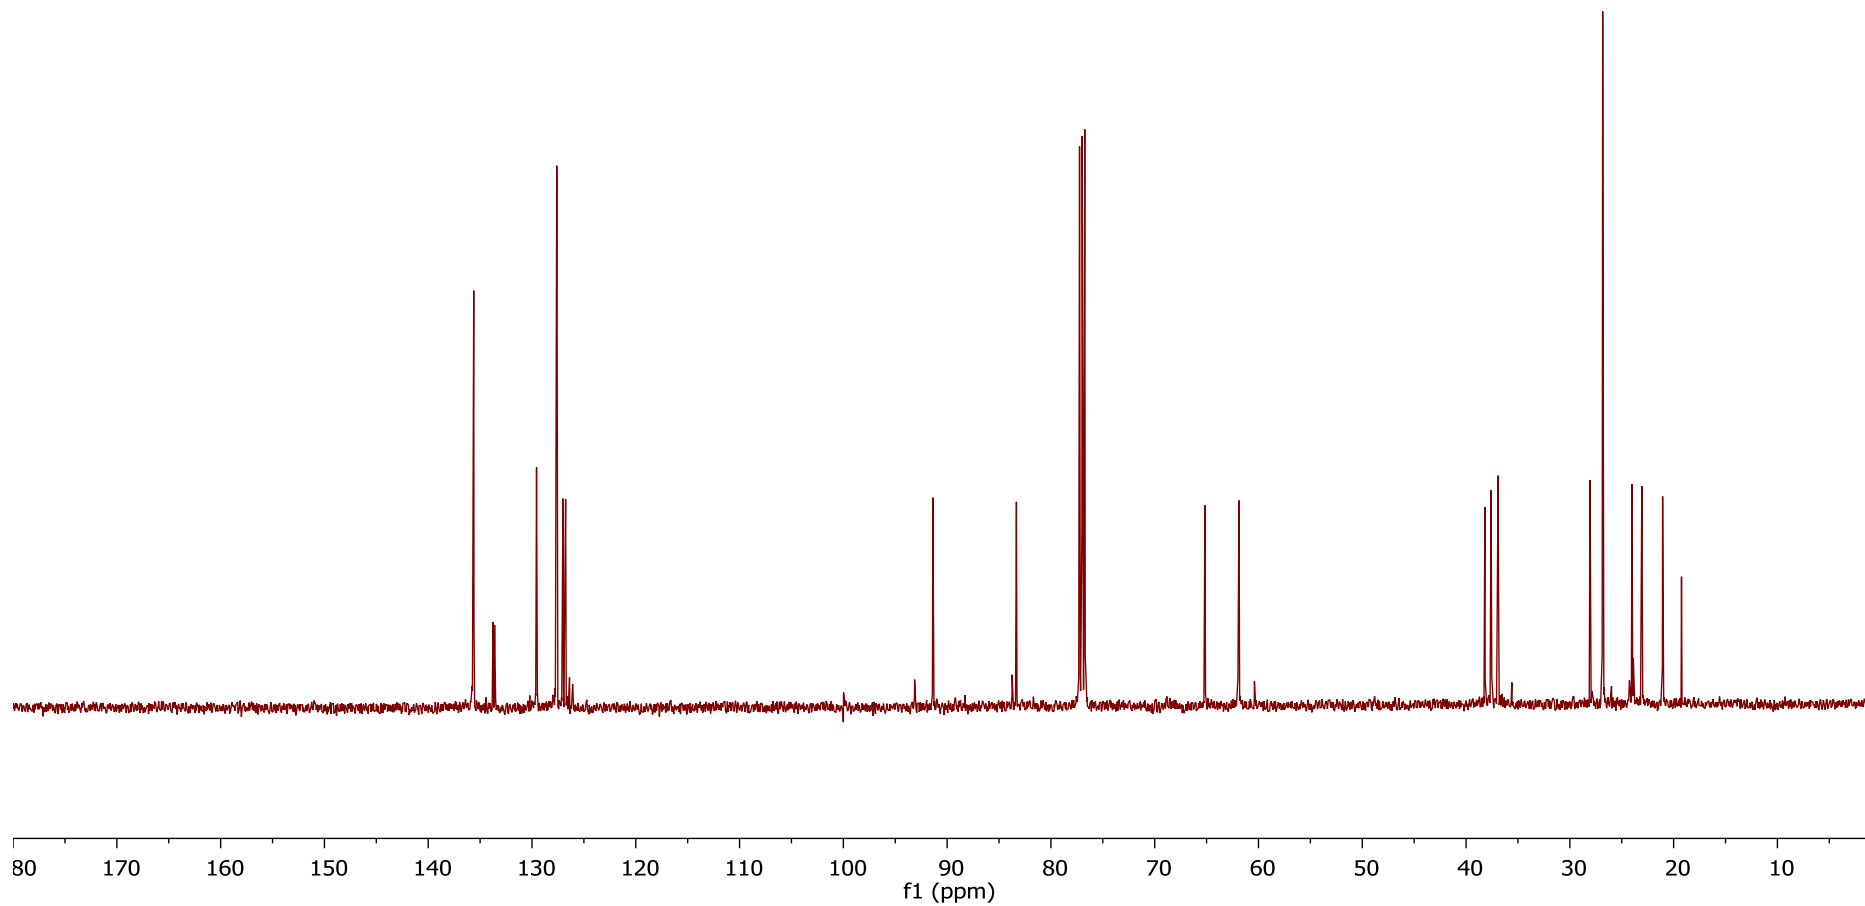

{2-[(1R,3S,3aS,7aR)-3-[[*tert*-Butyldiphenylsilyl]oxy]methyl]-1,3,3a,4,7,7a-hexahydro-2-benzofuran-1-yl]-2-methylpropyl}(propyl)amine **53**

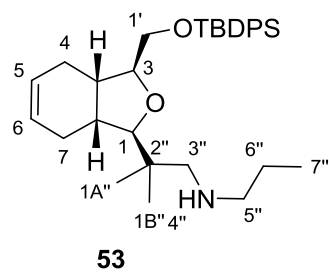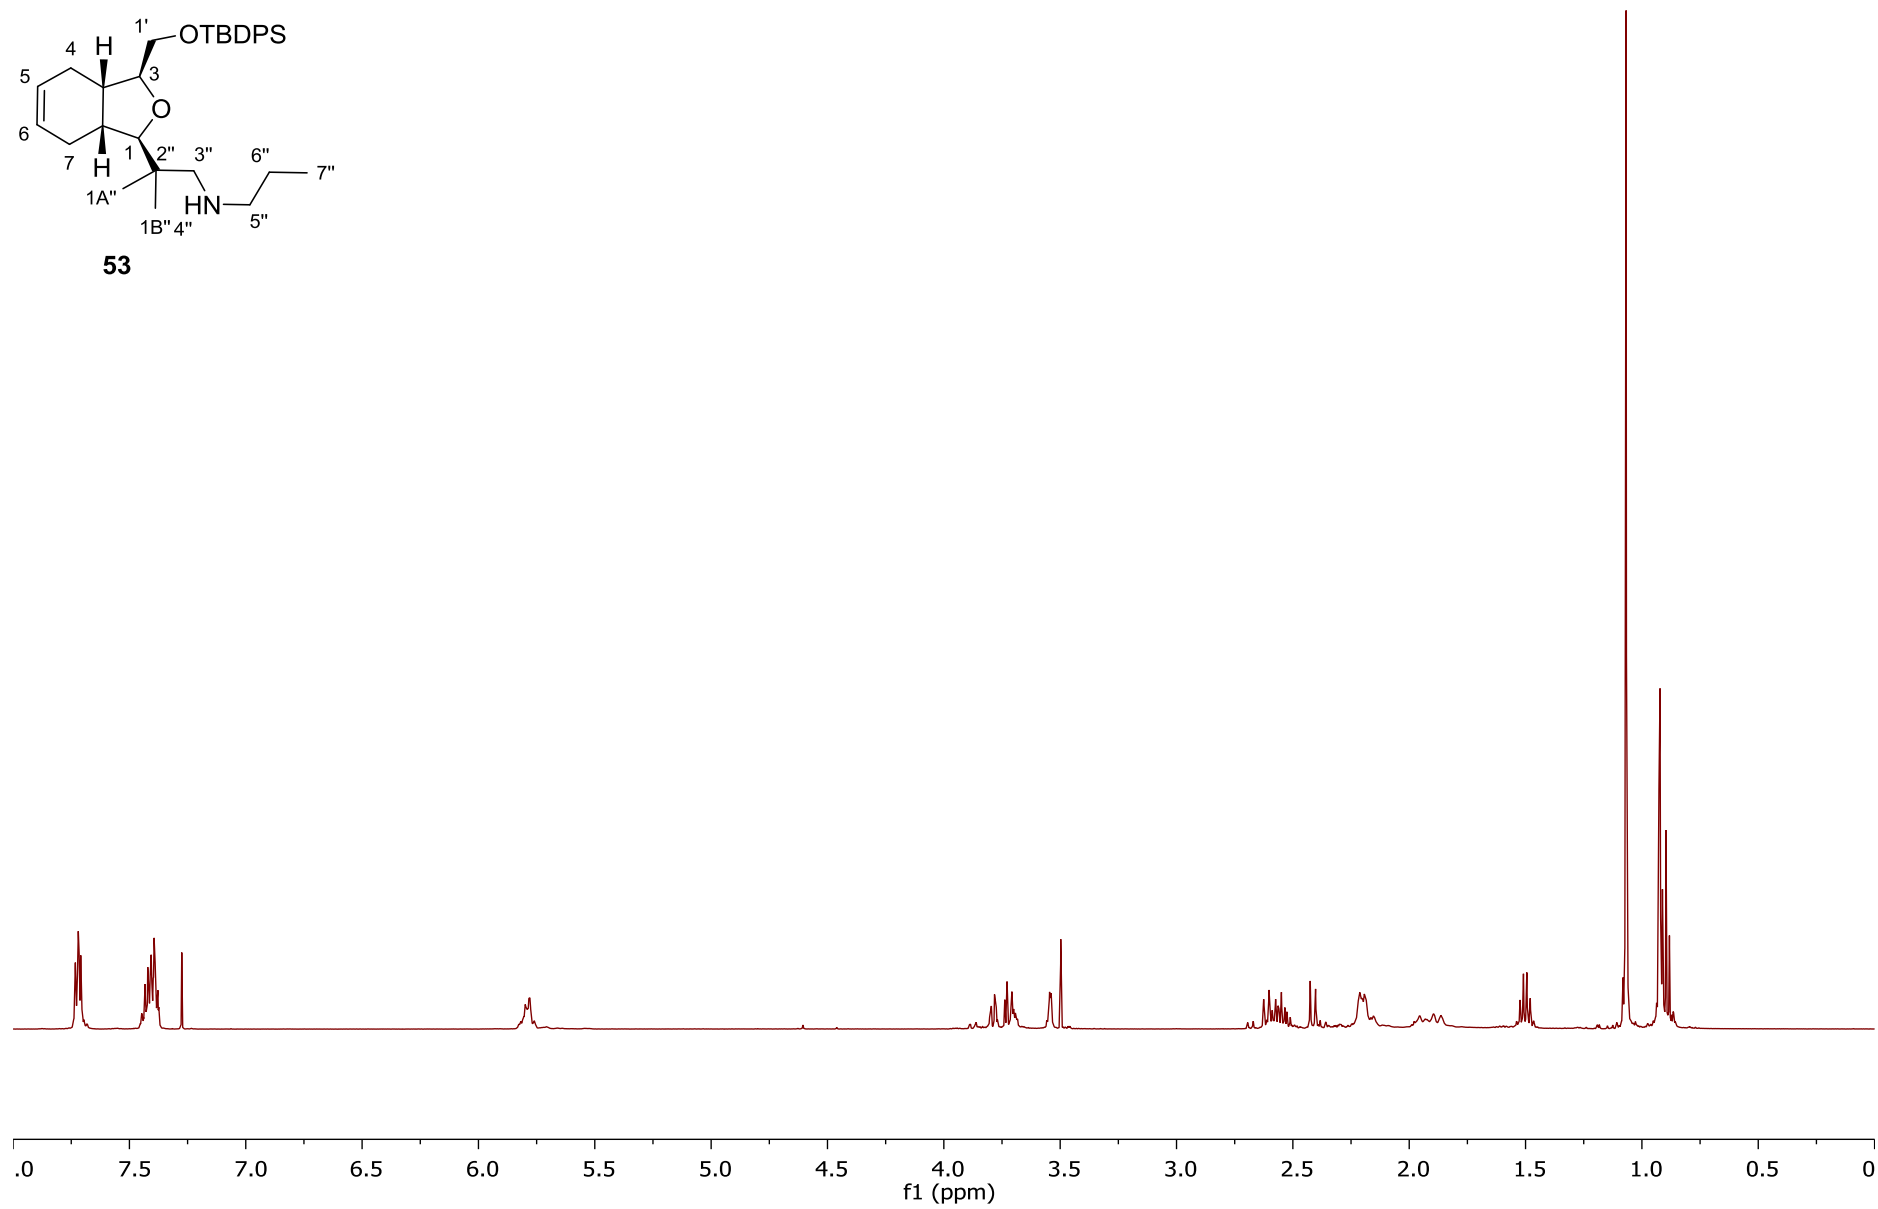

{2-[(1R,3S,3aS,7aR)-3-[[*tert*-Butyldiphenylsilyl]oxy]methyl]-1,3,3a,4,7,7a-hexahydro-2-benzofuran-1-yl]-2-methylpropyl}(propyl)amine **53**

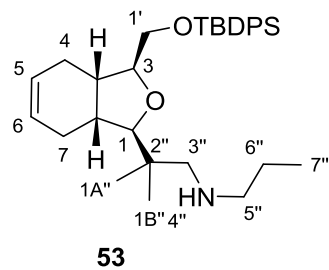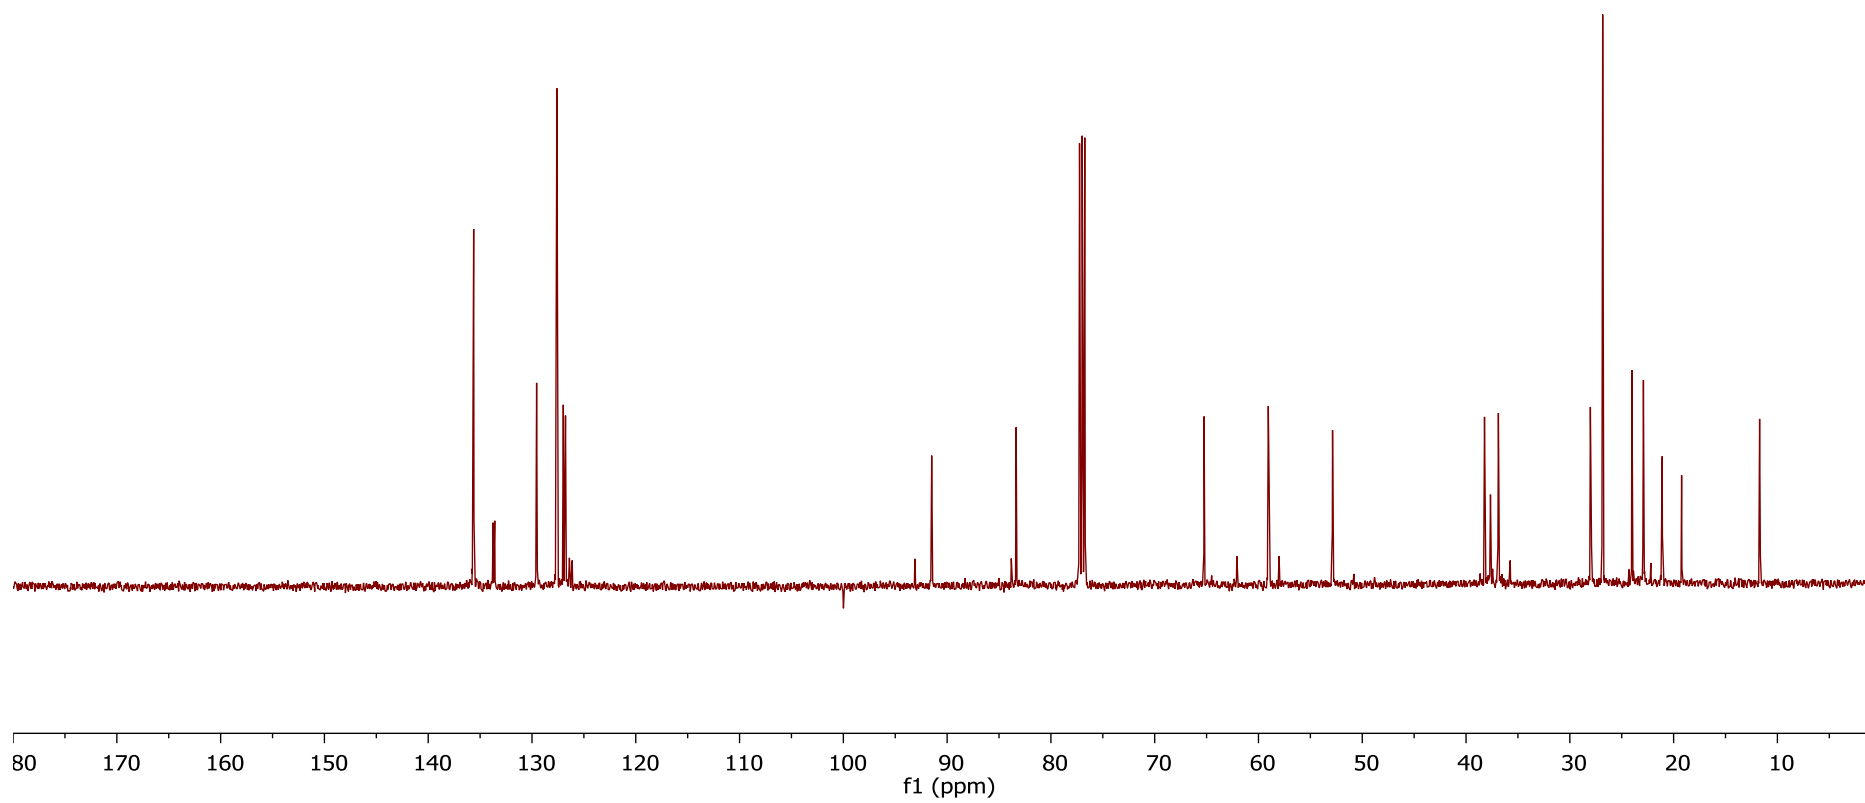



{2-[(1R,3S,3aS,7aR)-3-[[*tert*-Butyldiphenylsilyl]oxy]methyl]-1,3,3a,4,7,7a-hexahydro-2-benzofuran-1-yl]-2-methylpropyl}(2-methoxyethyl)amine **54**

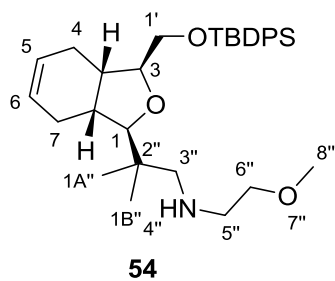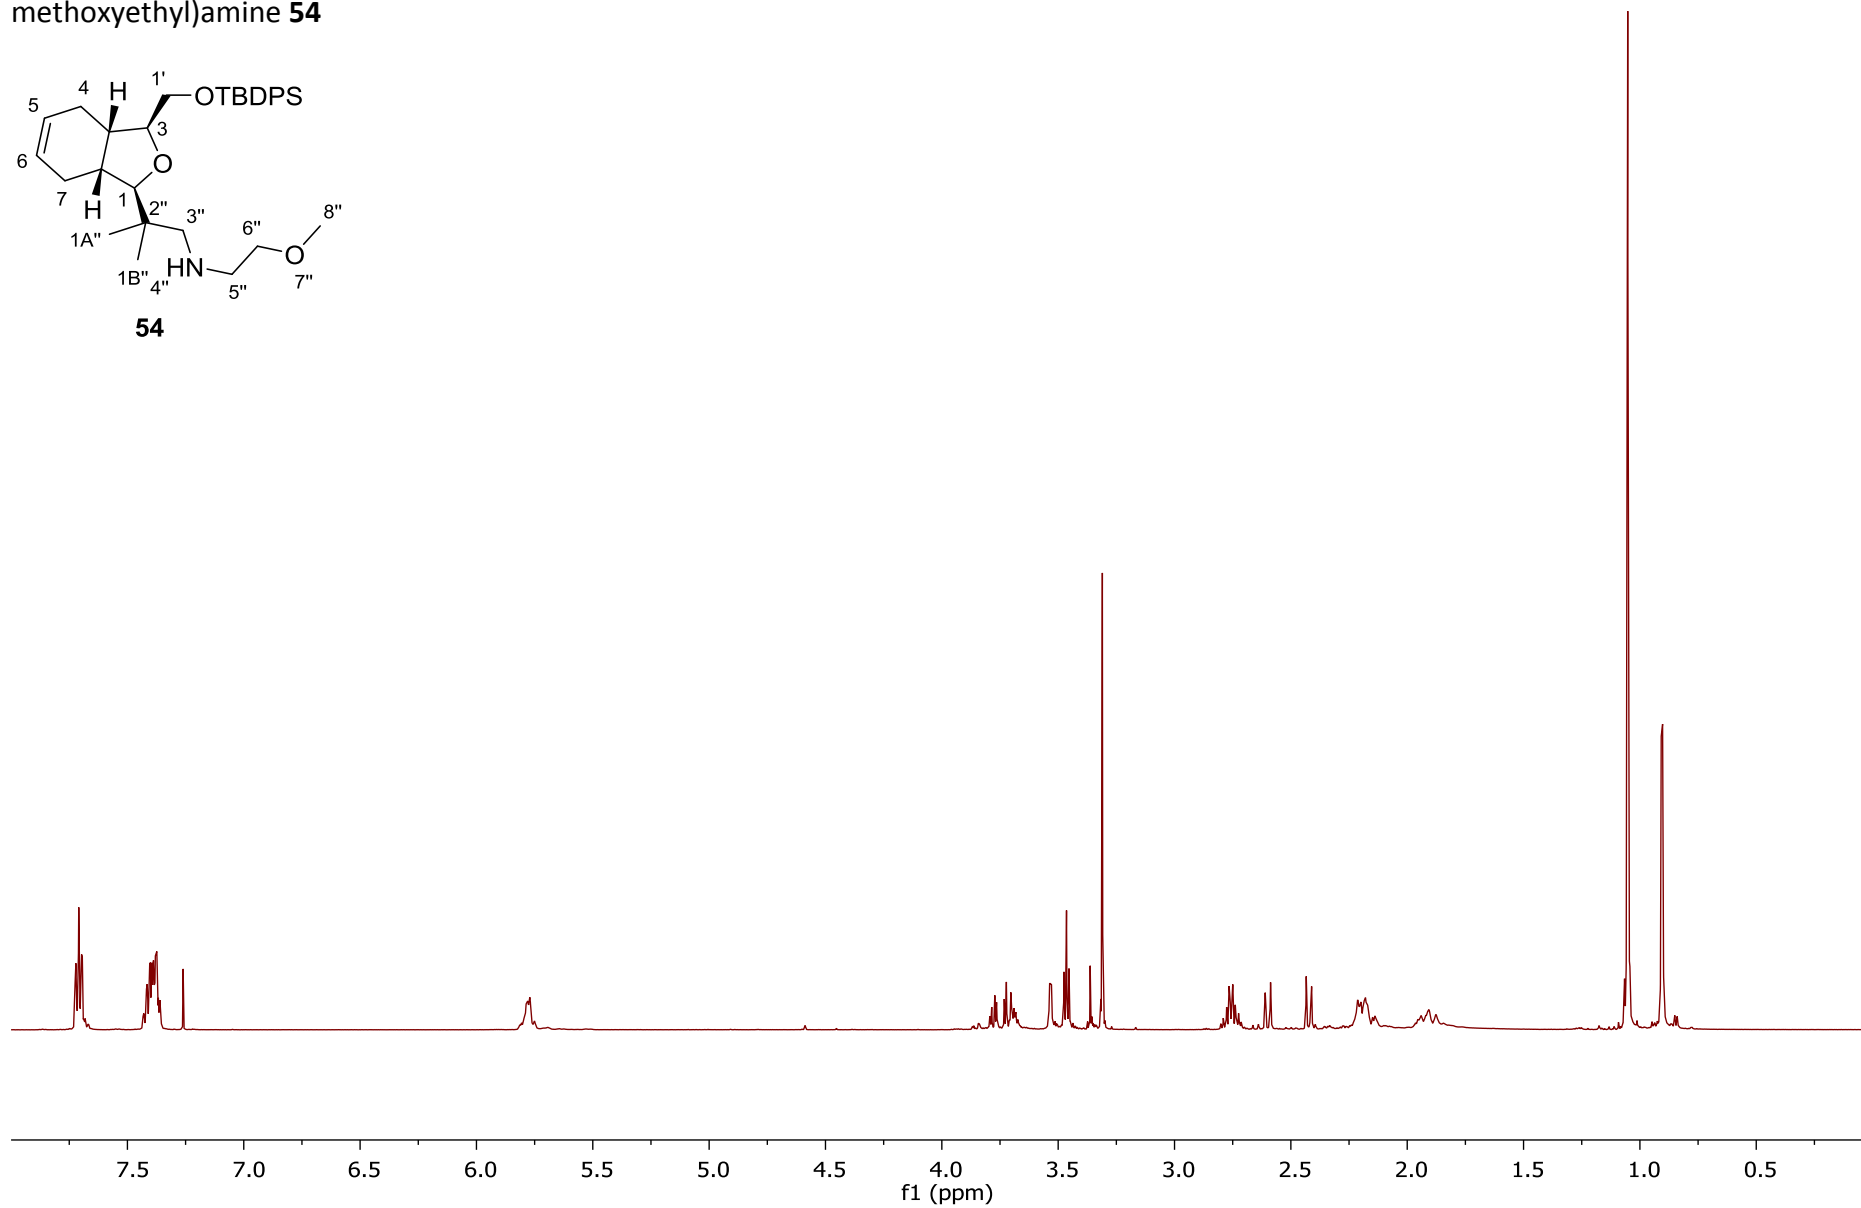

{2-[(1R,3S,3aS,7aR)-3-[[*tert*-Butyldiphenylsilyl]oxy]methyl]-1,3,3a,4,7,7a-hexahydro-2-benzofuran-1-yl]-2-methylpropyl}(2-methoxyethyl)amine **54**

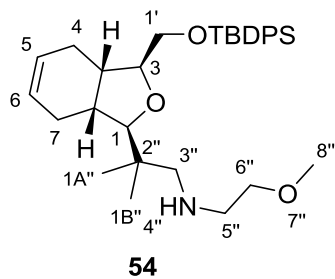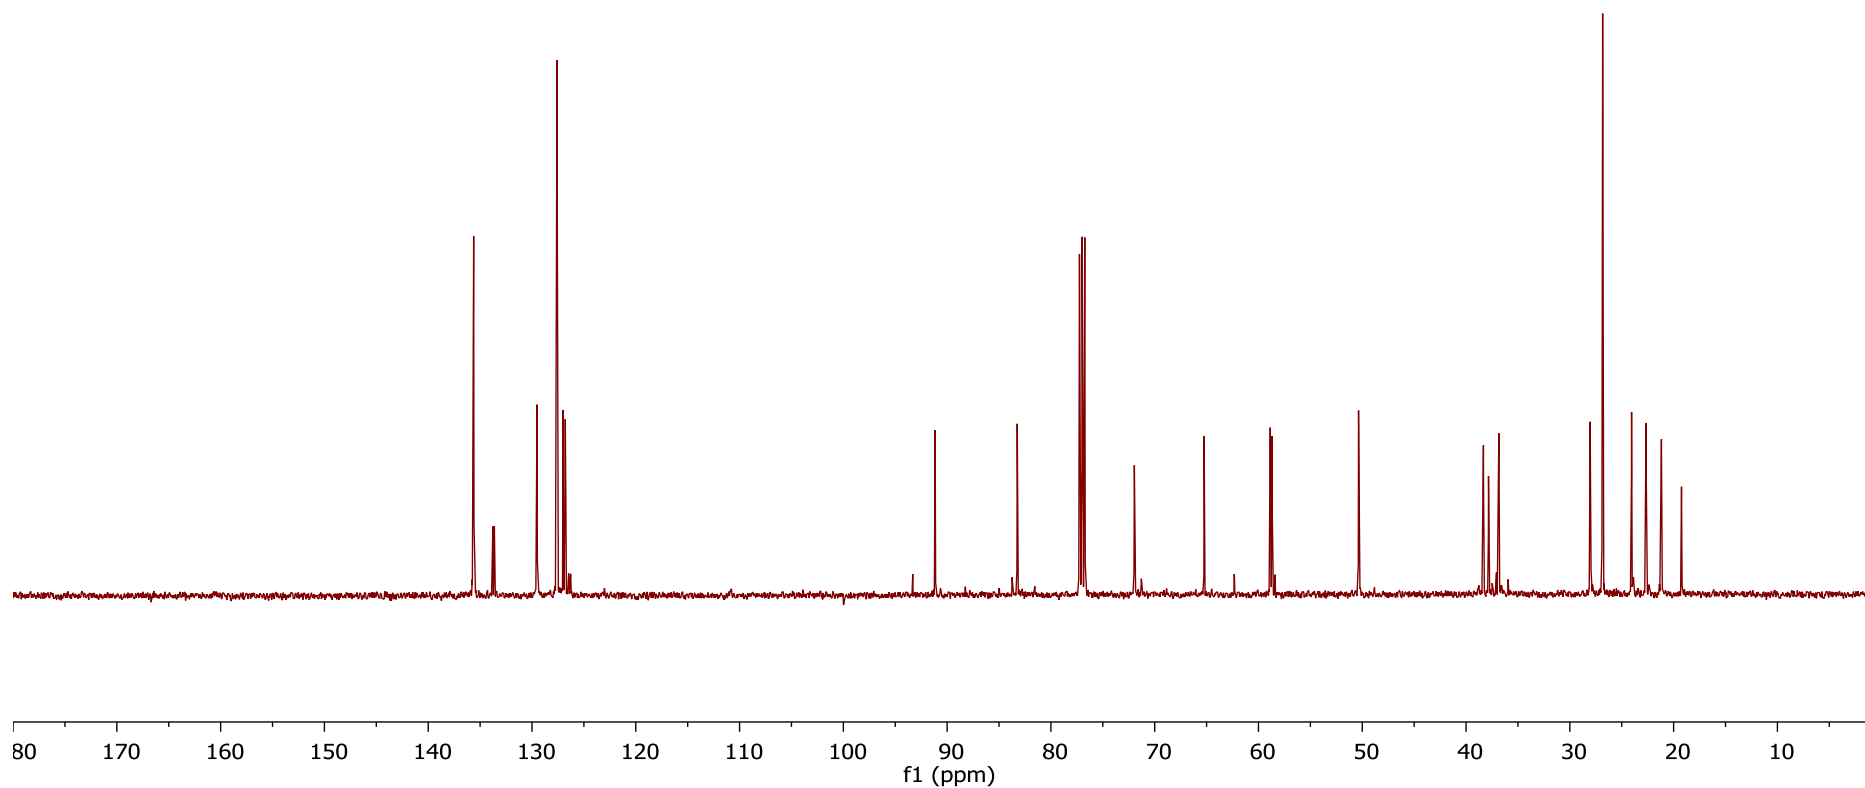

[(1S,3R,3aR,7aS)-3-[1-(benzylamino)-2-methylpropan-2-yl]-1,3,3a,4,7,7a-hexahydro-2-benzofuran-1-yl]methanol **55**

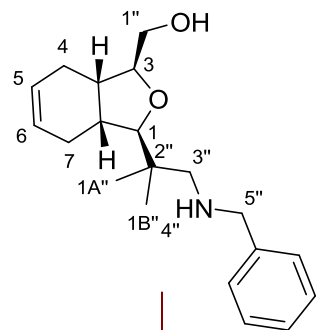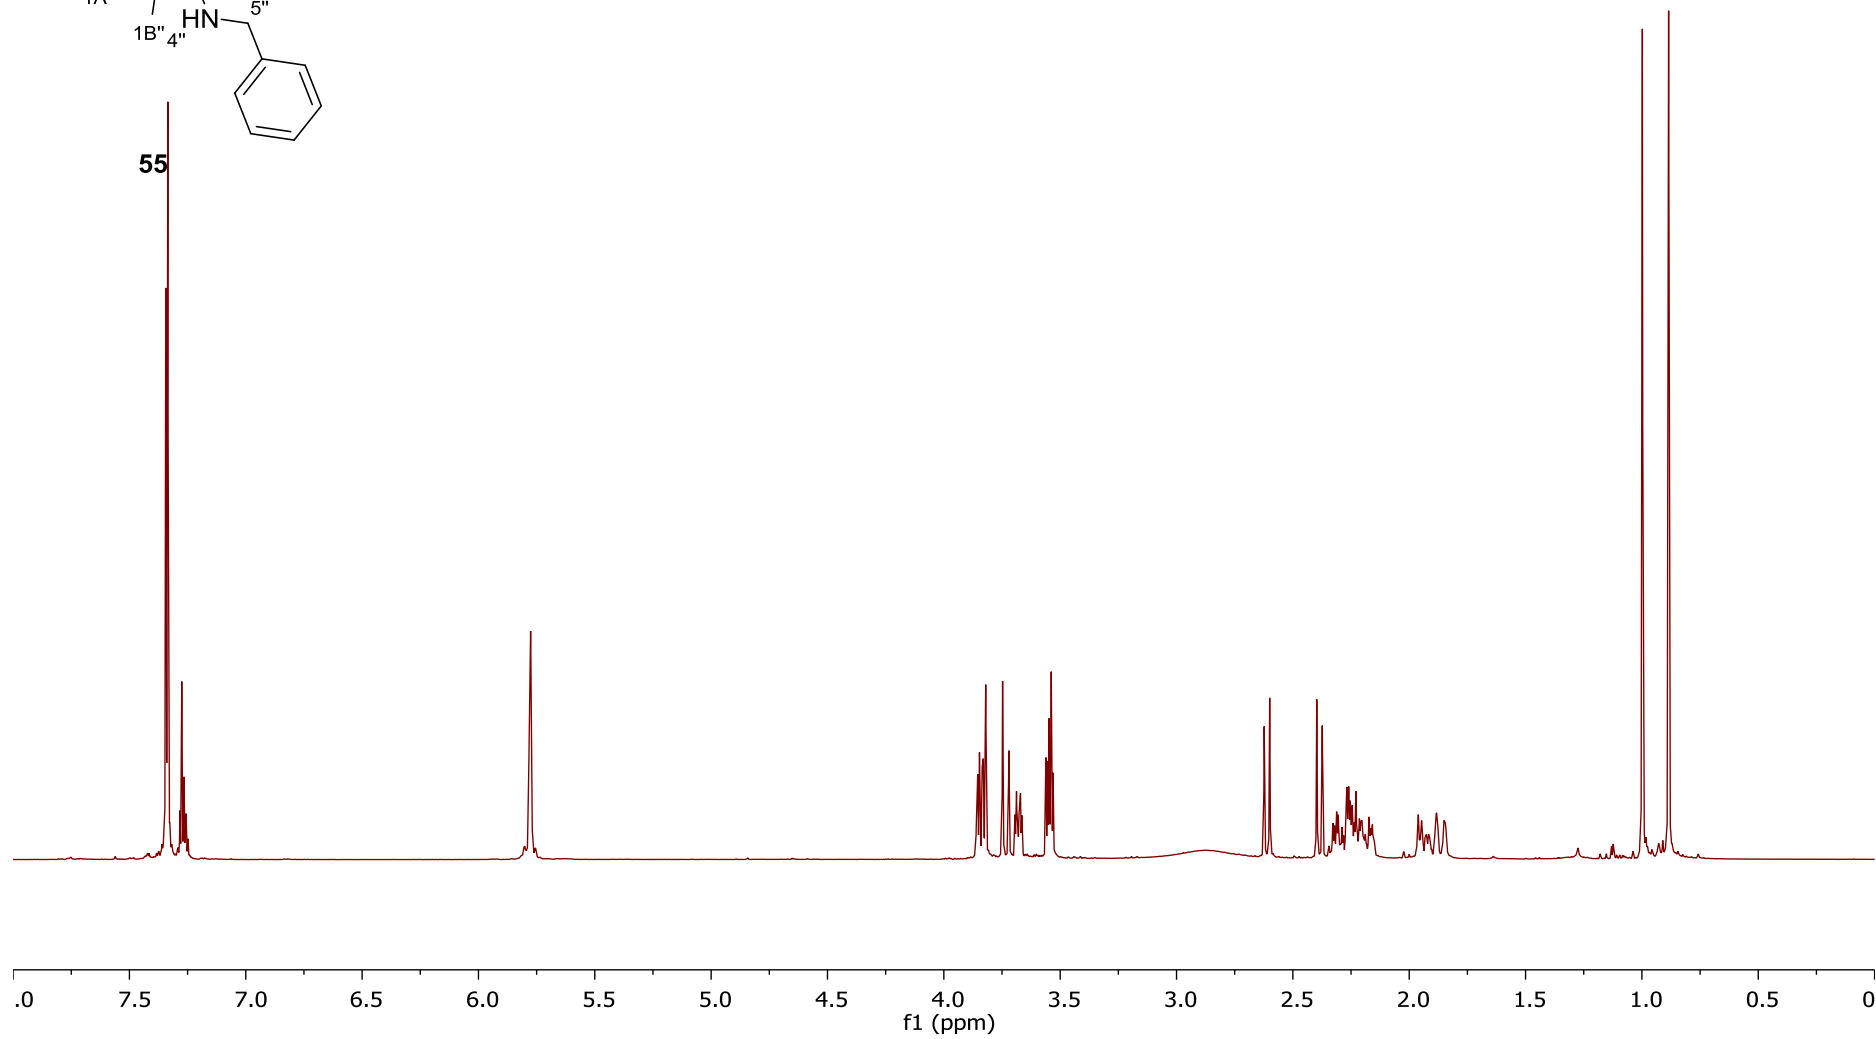

[(1S,3R,3aR,7aS)-3-[1-(benzylamino)-2-methylpropan-2-yl]-1,3,3a,4,7,7a-hexahydro-2-benzofuran-1-yl]methanol **55**

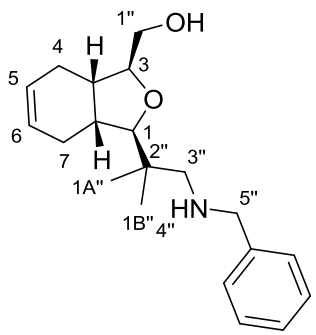

**55**

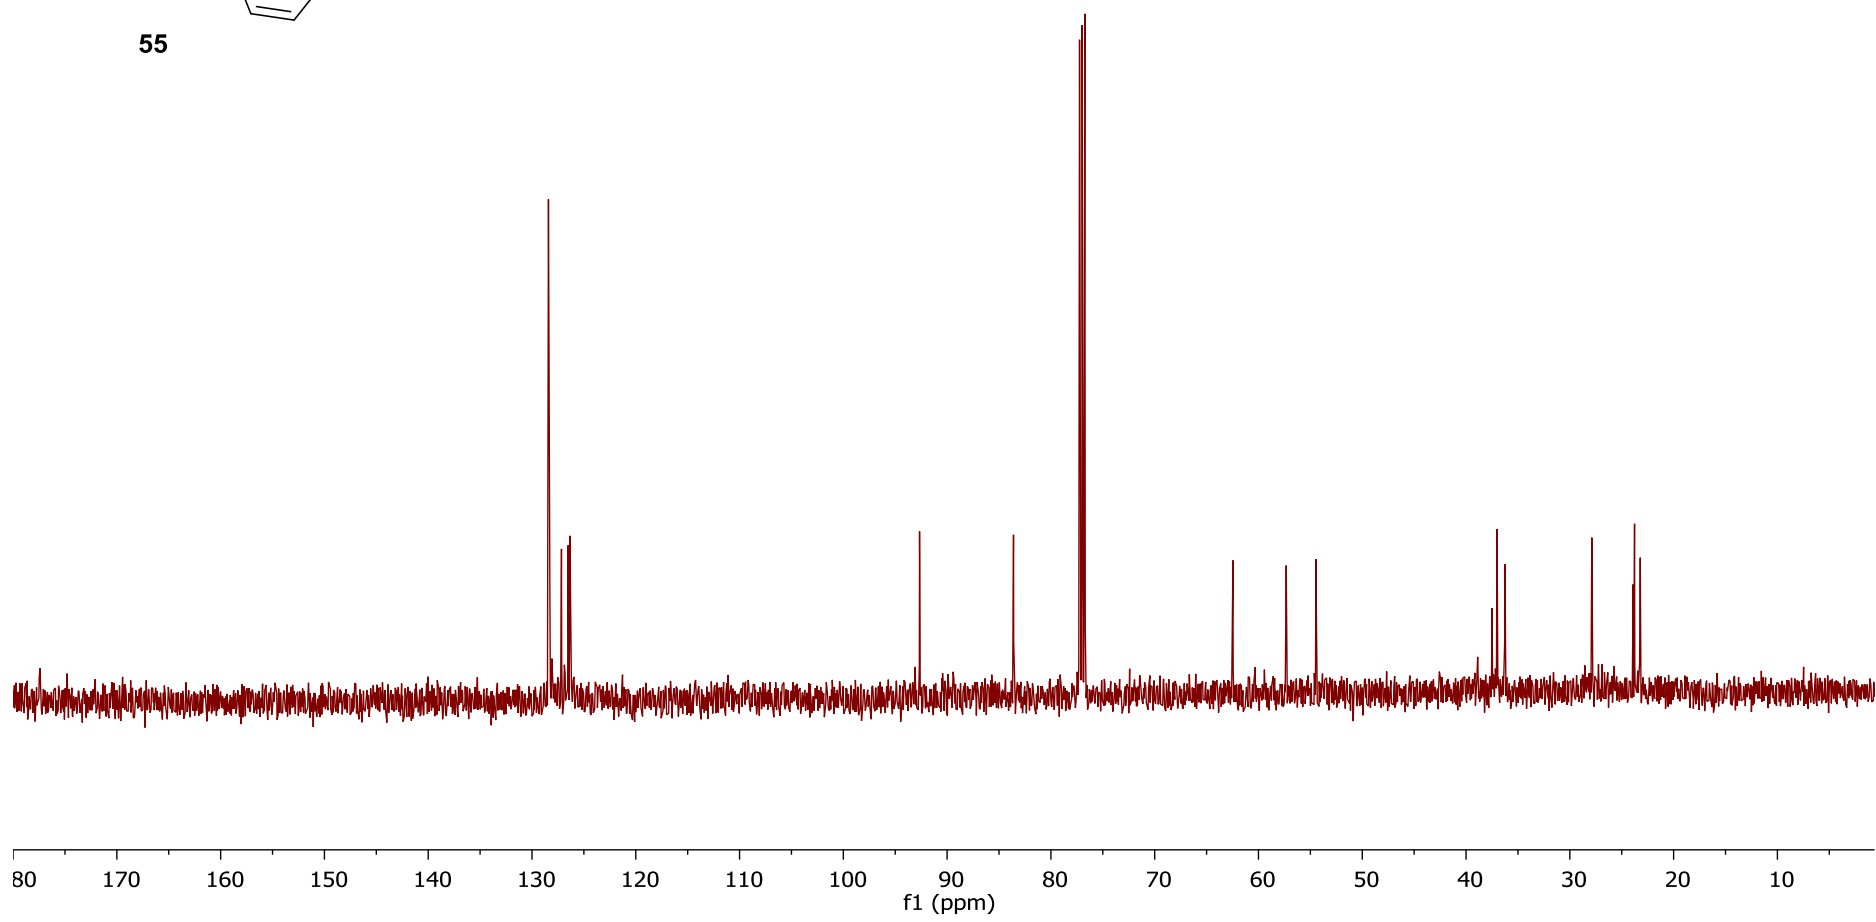

[(1S,3R,3aR,7aS)-3-(1-[[3-Methoxyphenyl]methyl]amino)-2-methylpropan-2-yl)-1,3,3a,4,7,7a-hexahydro-2-benzofuran-1-yl]methanol **56**

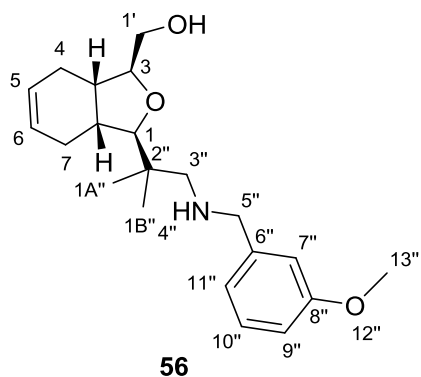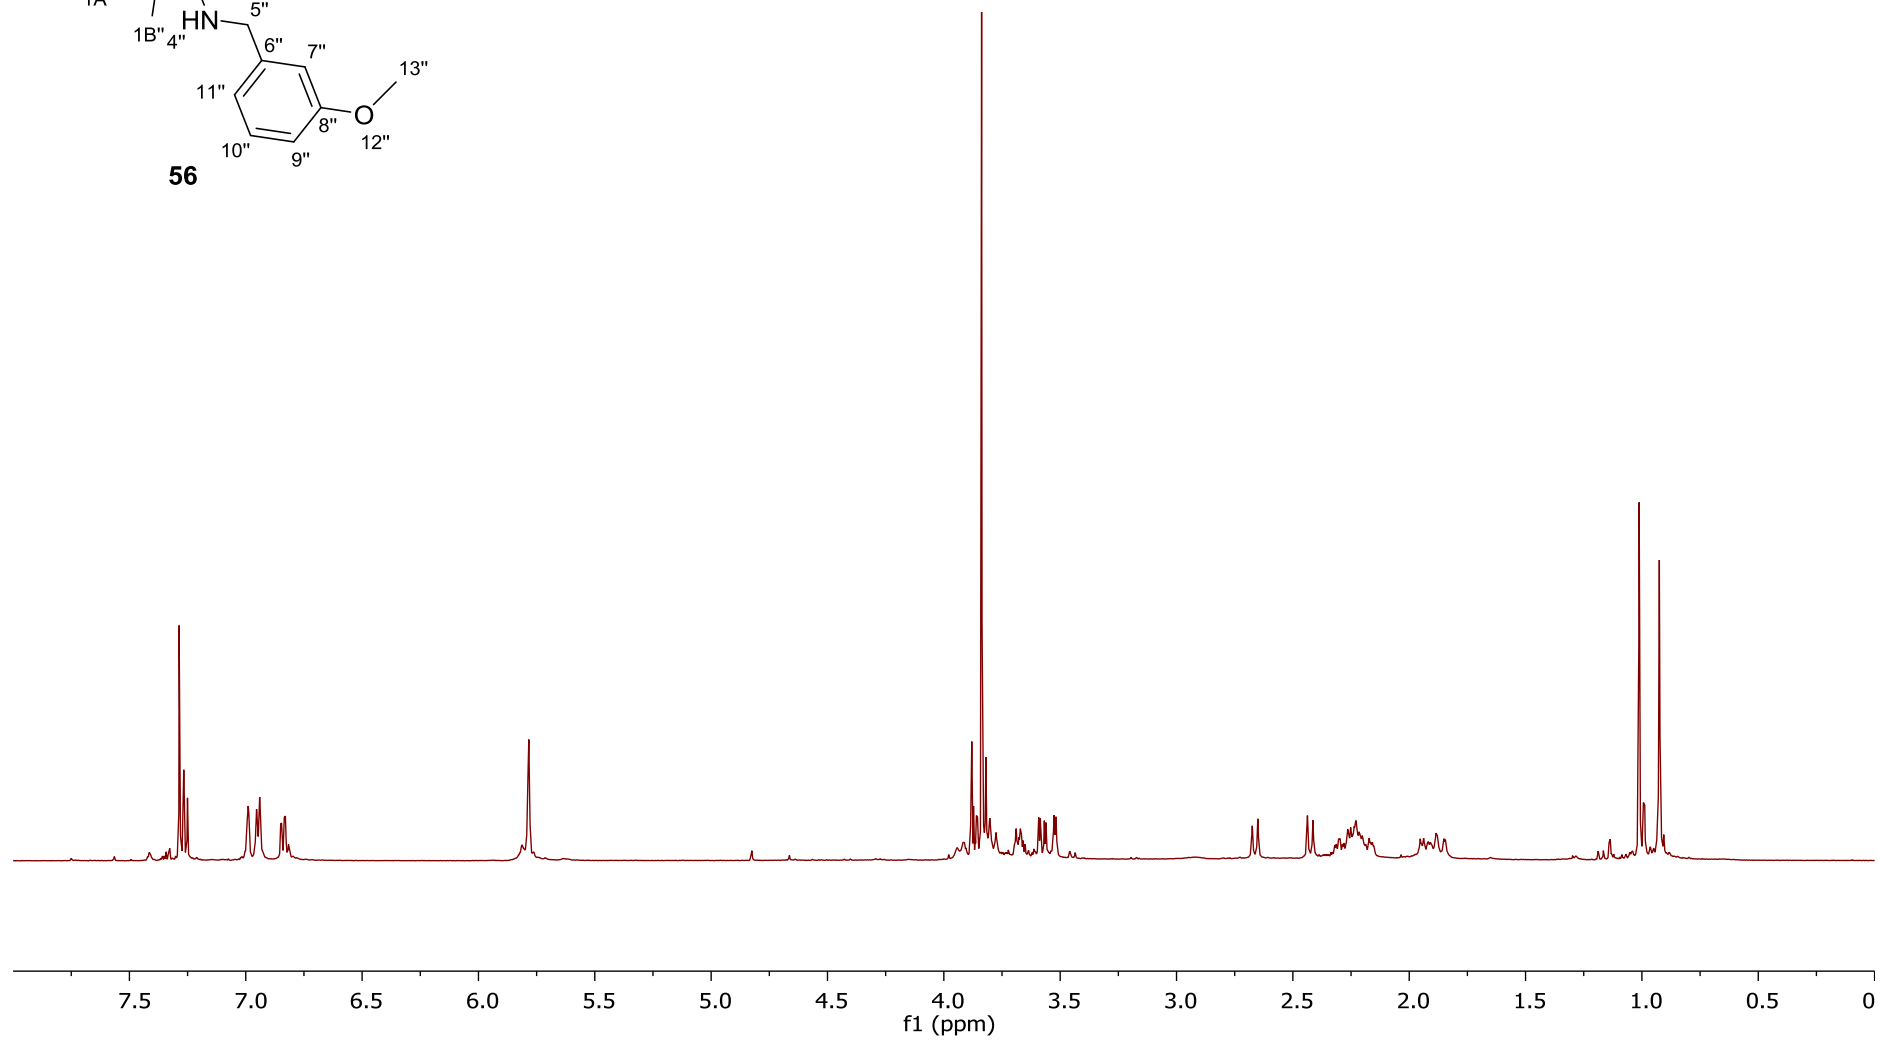

[(1S,3R,3aR,7aS)-3-(1-[[3-Methoxyphenyl]methyl]amino)-2-methylpropan-2-yl)-1,3,3a,4,7,7a-hexahydro-2-benzofuran-1-yl]methanol **56**

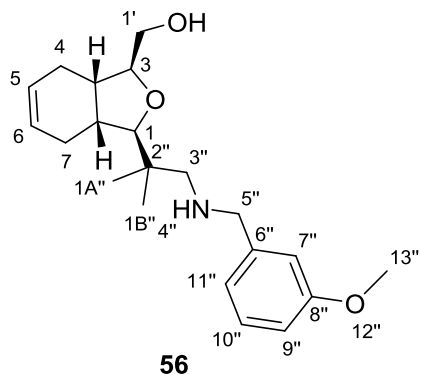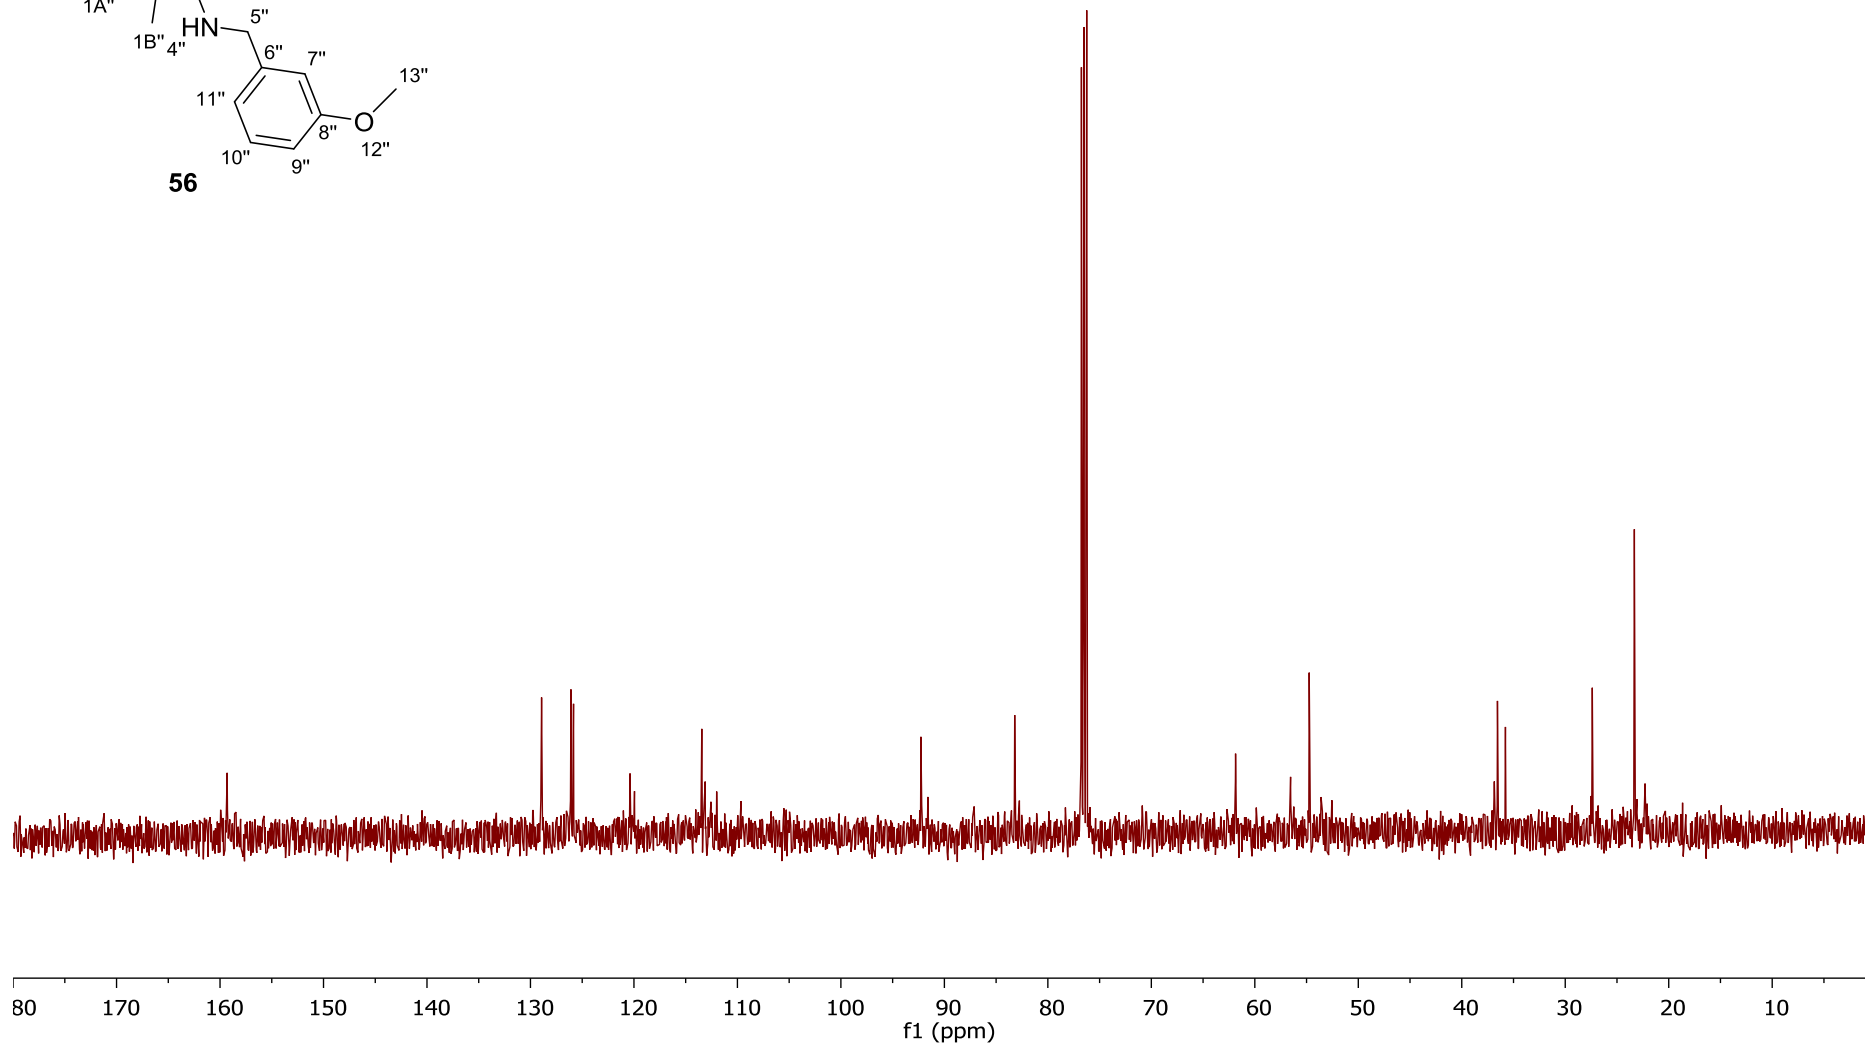

[(1S,3R,3aR,7aS)-3-[2-Methyl-1-(methylamino)propan-2-yl]-1,3,3a,4,7,7a-hexahydro-2-benzofuran-1-yl]methanol **57**

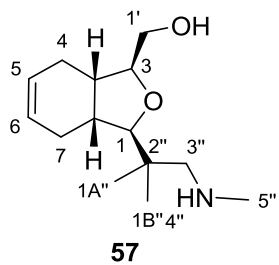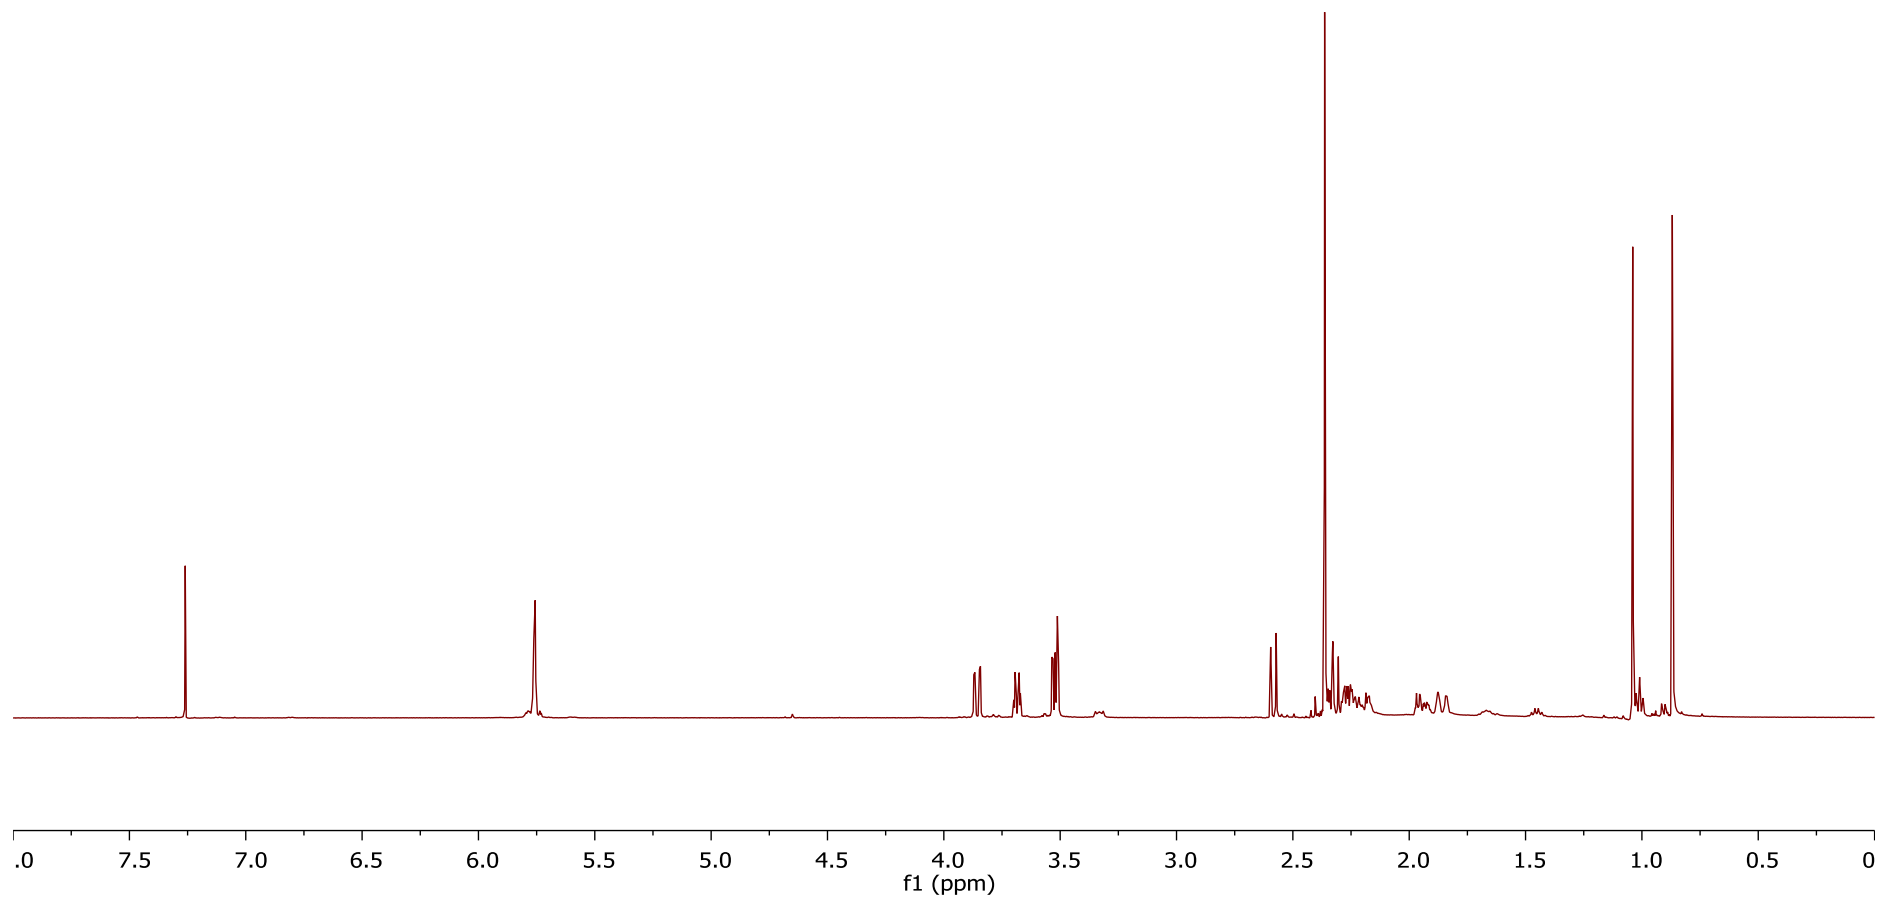

[(1S,3R,3aR,7aS)-3-[2-Methyl-1-(methylamino)propan-2-yl]-1,3,3a,4,7,7a-hexahydro-2-benzofuran-1-yl]methanol **57**

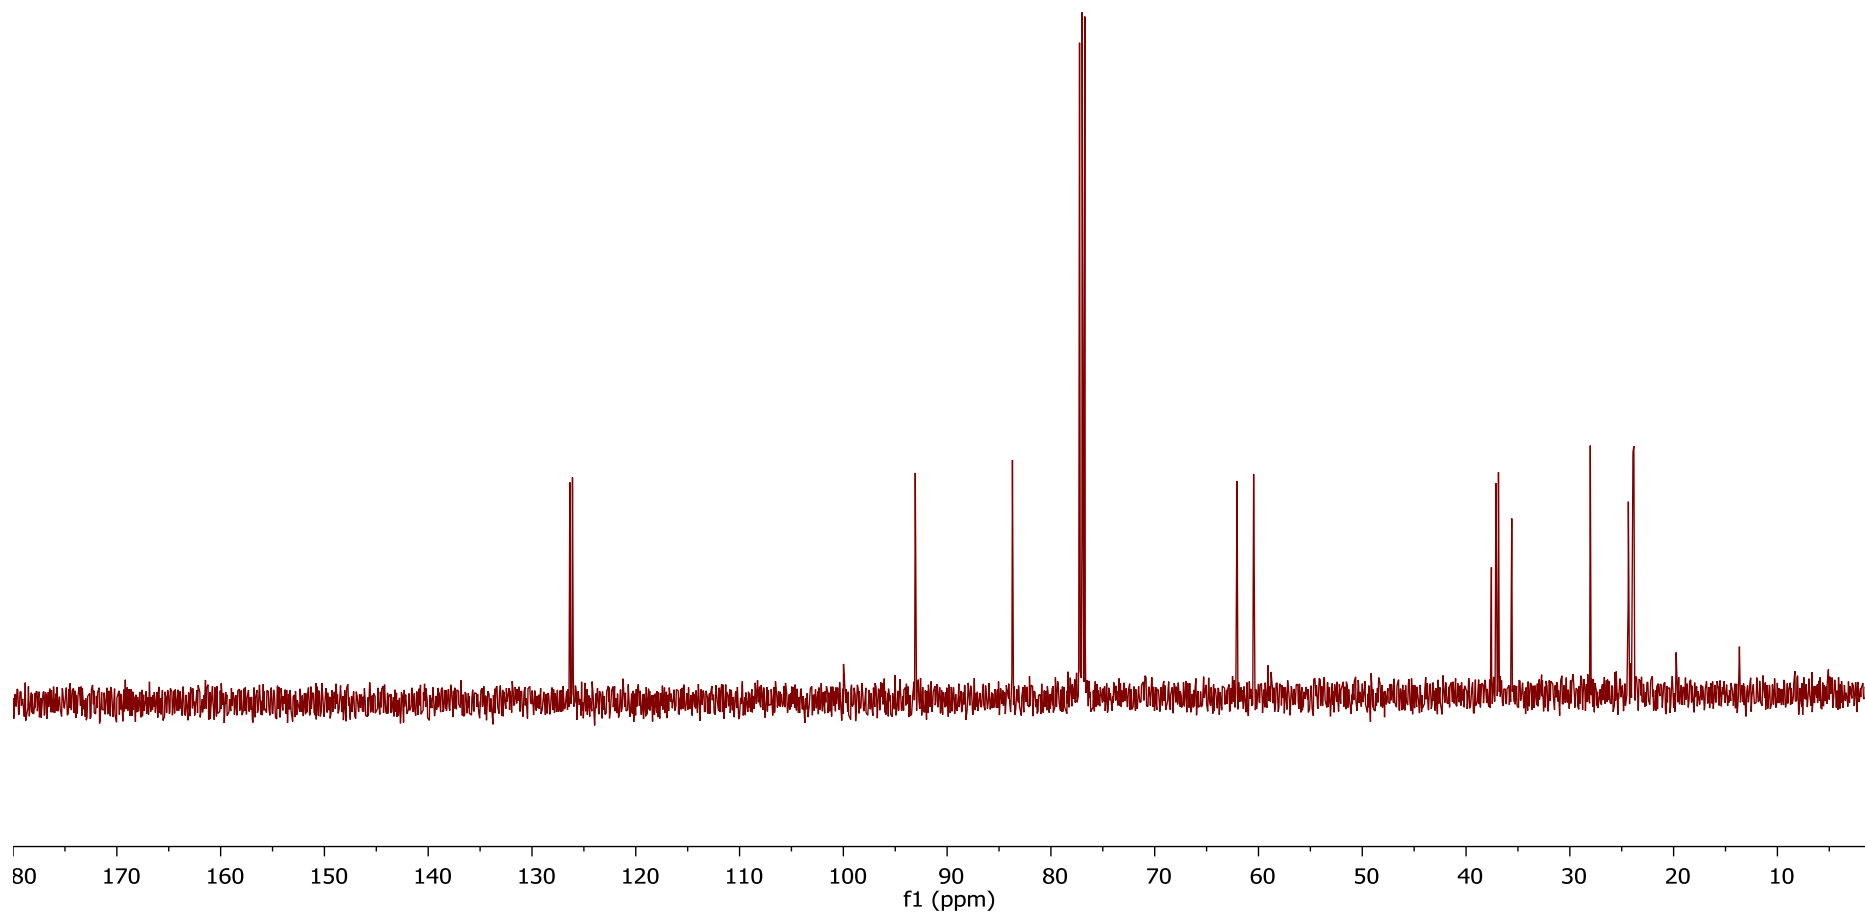



[(1S,3R,3aR,7aS)-3-[2-methyl-1-(propylamino)propan-2-yl]-1,3,3a,4,7,7a-hexahydro-2-benzofuran-1-yl]methanol **58**

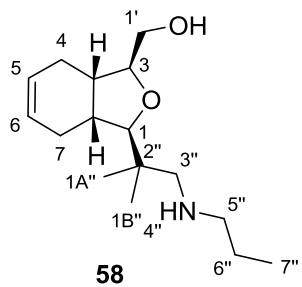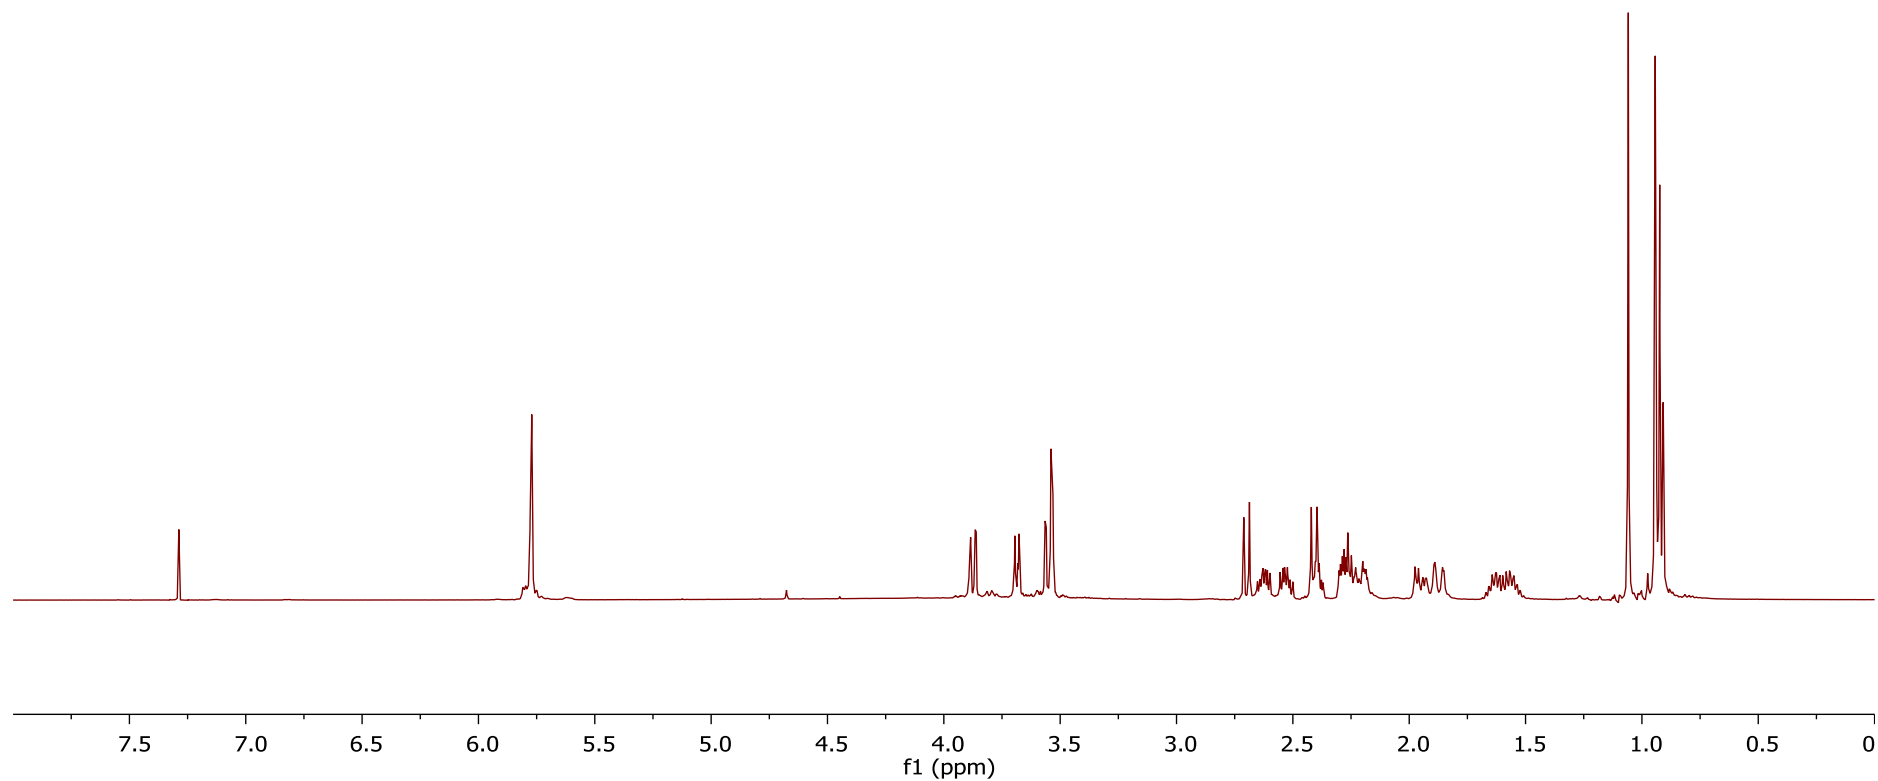

[(1S,3R,3aR,7aS)-3-[2-methyl-1-(propylamino)propan-2-yl]-1,3,3a,4,7,7a-hexahydro-2-benzofuran-1-yl]methanol **58**

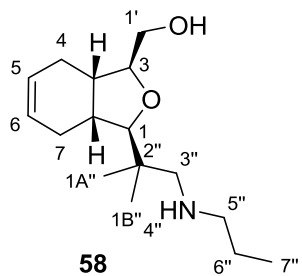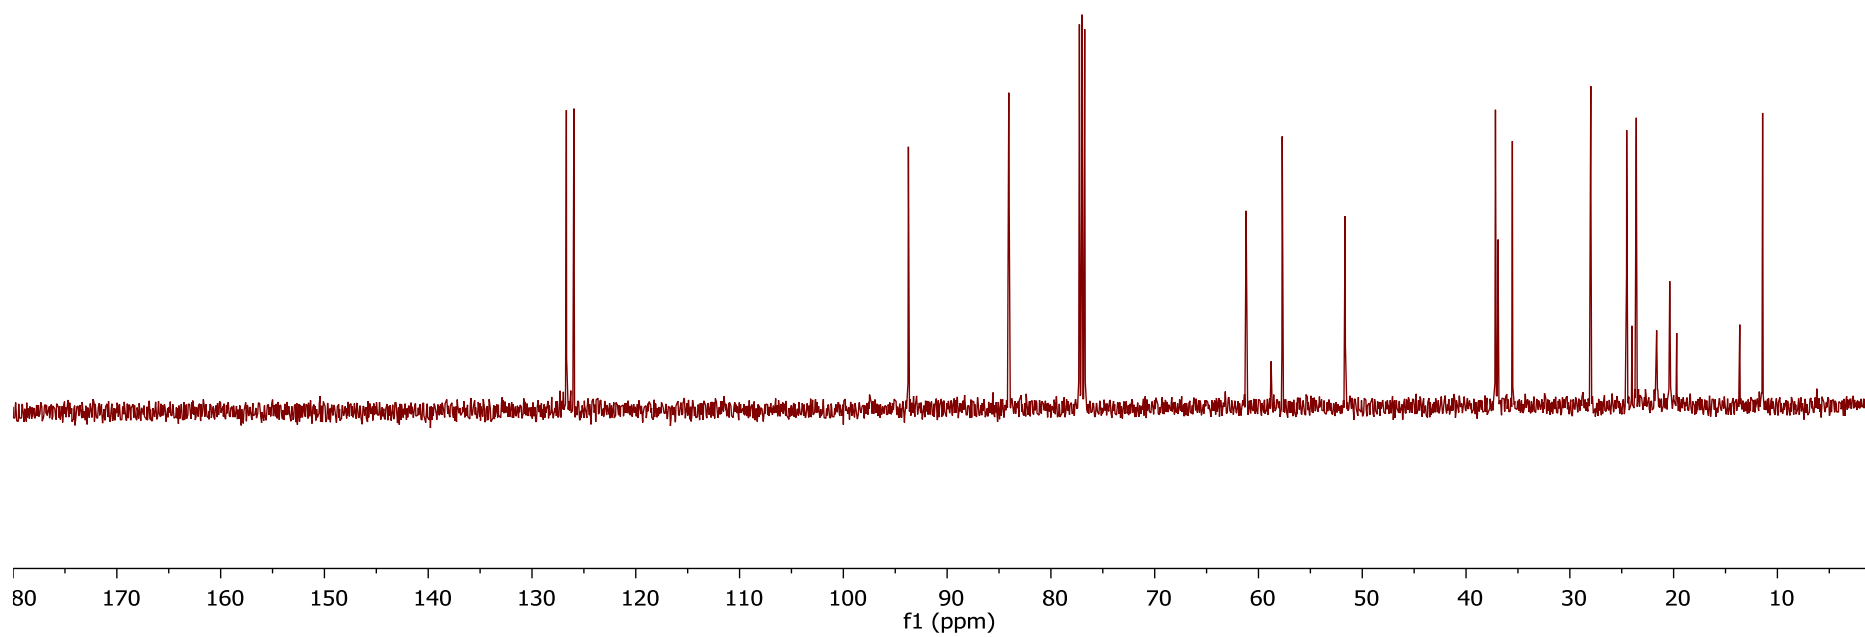

[(1S,3R,3aR,7aS)-3-{1-[(2-Methoxyethyl)amino]-2-methylpropan-2-yl}-1,3,3a,4,7,7a-hexahydro-2-benzofuran-1-yl]methanol **59**

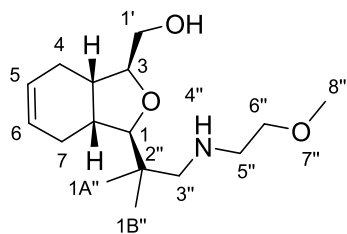

**59**

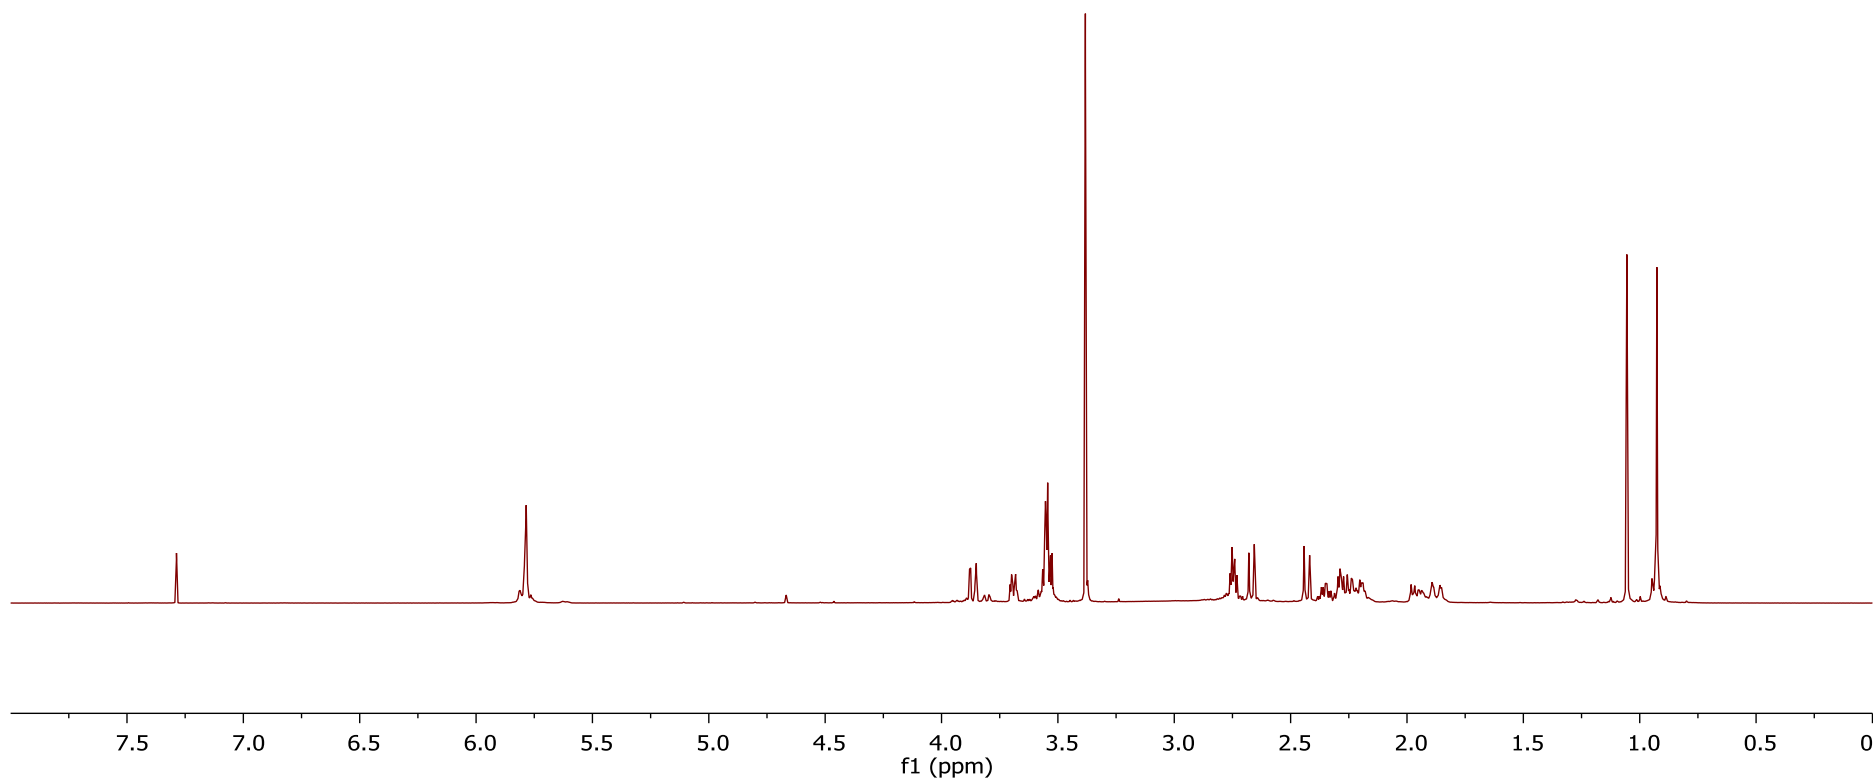

[(1S,3R,3aR,7aS)-3-{1-[(2-Methoxyethyl)amino]-2-methylpropan-2-yl}-1,3,3a,4,7,7a-hexahydro-2-benzofuran-1-yl]methanol **59**



**59**

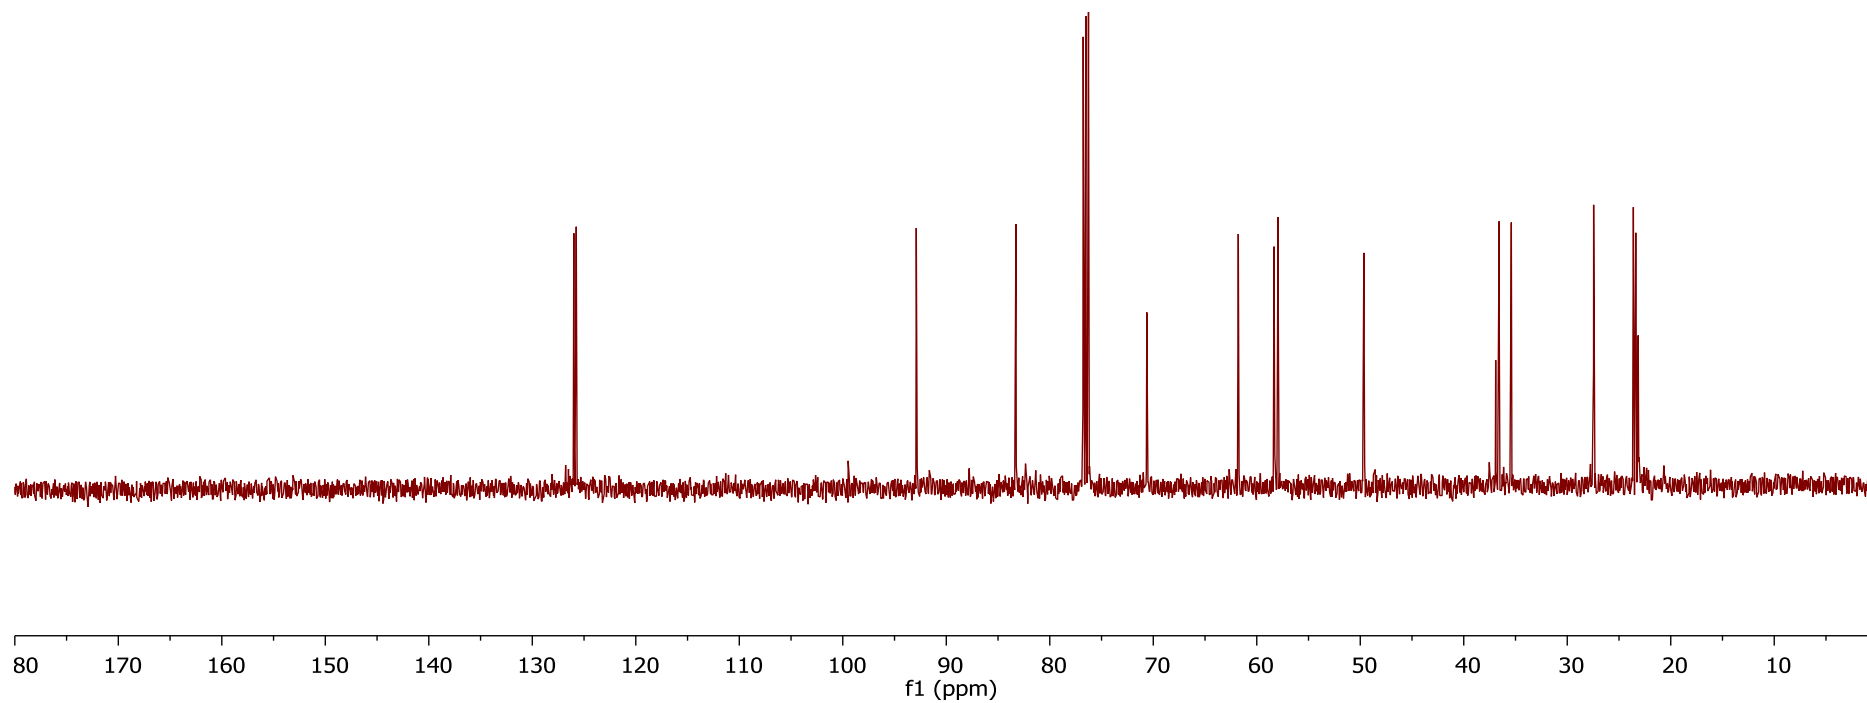

[(1*S*,3*S*,3*aR*,7*aS*)-3-(2-methoxy-3-phenylpropyl)-octahydro-2-benzofuran-1-yl]methanol **60**

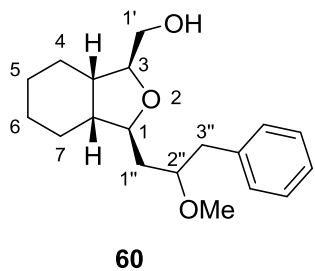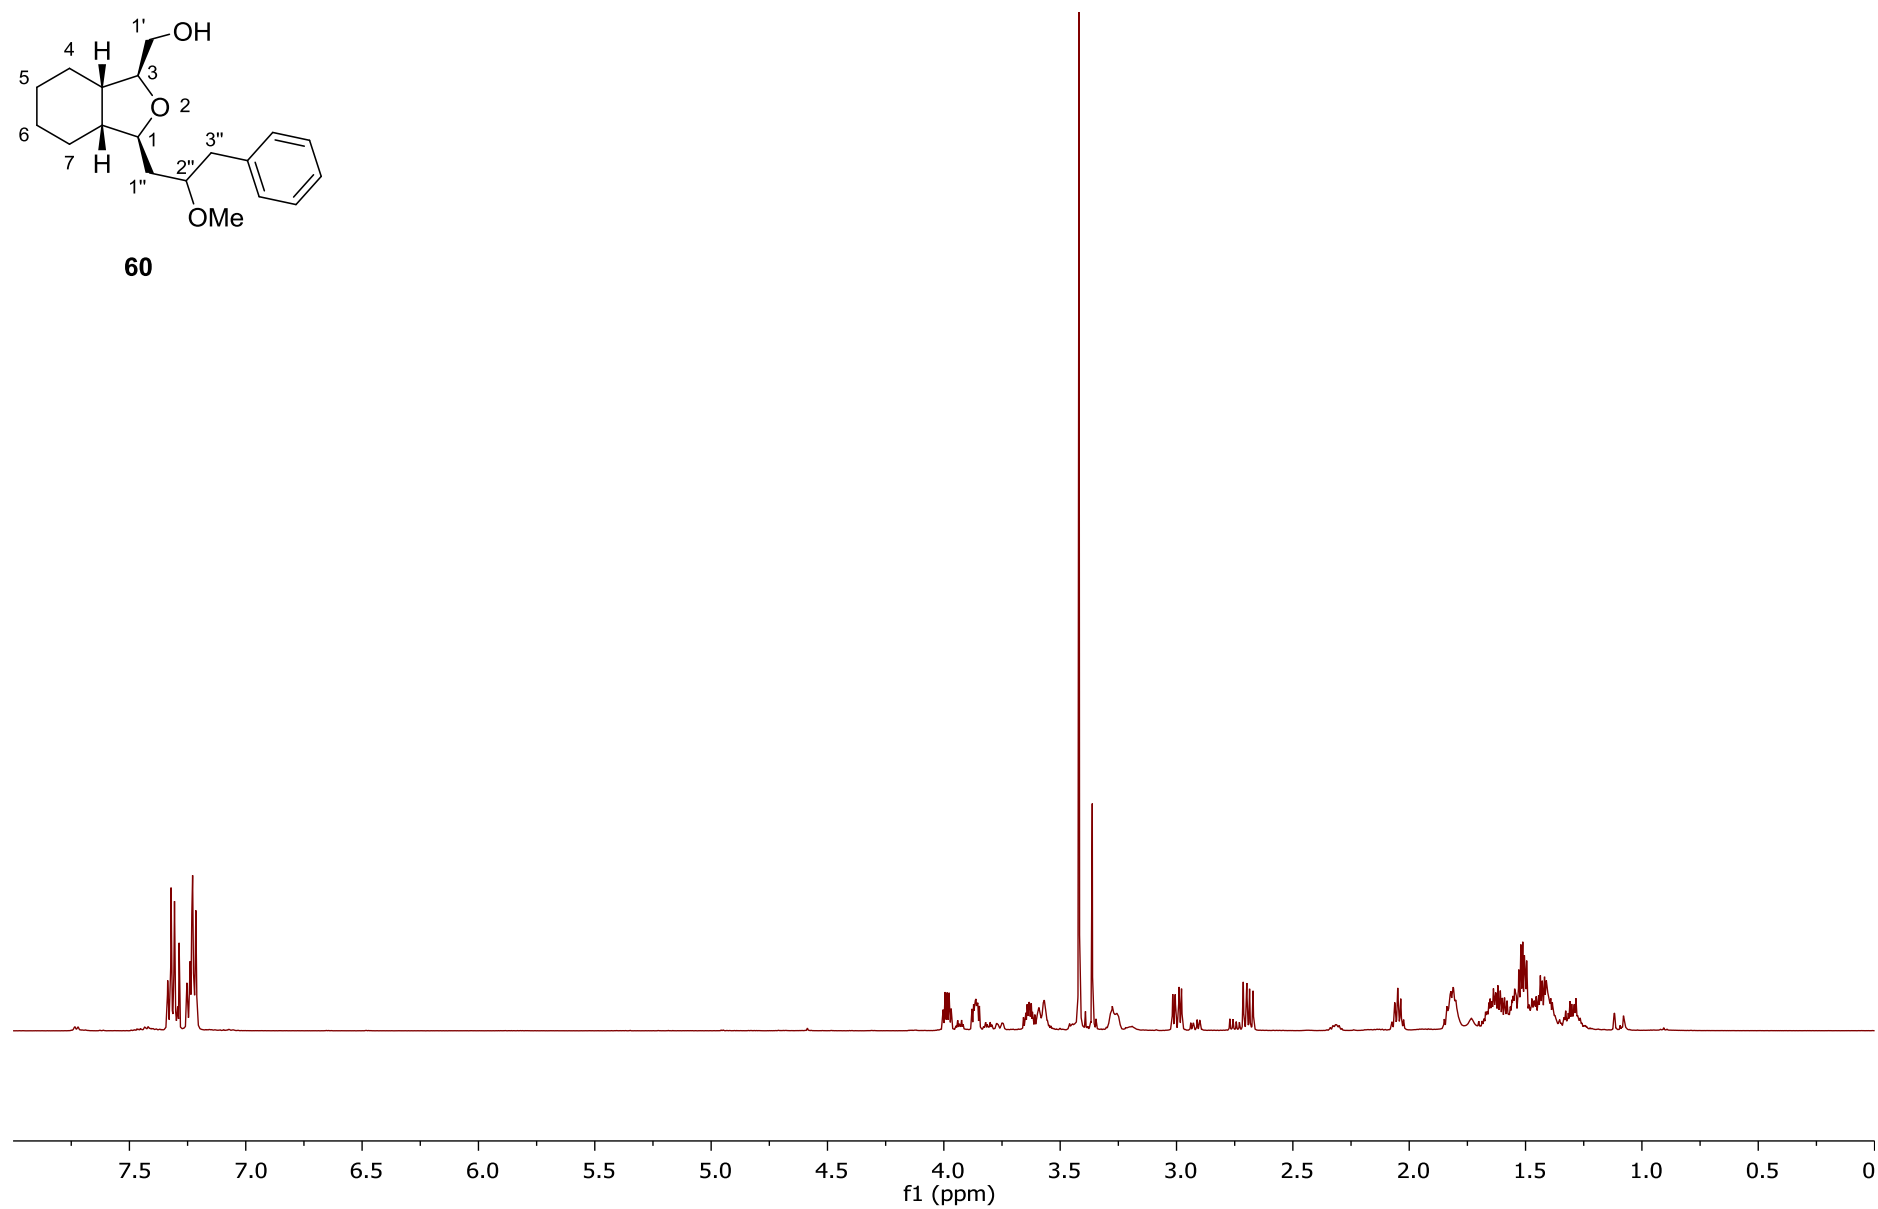

[(1S,3S,3aR,7aS)-3-(2-methoxy-3-phenylpropyl)-octahydro-2-benzofuran-1-yl]methanol **60**

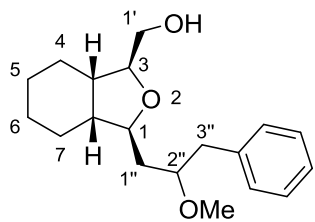

**60**

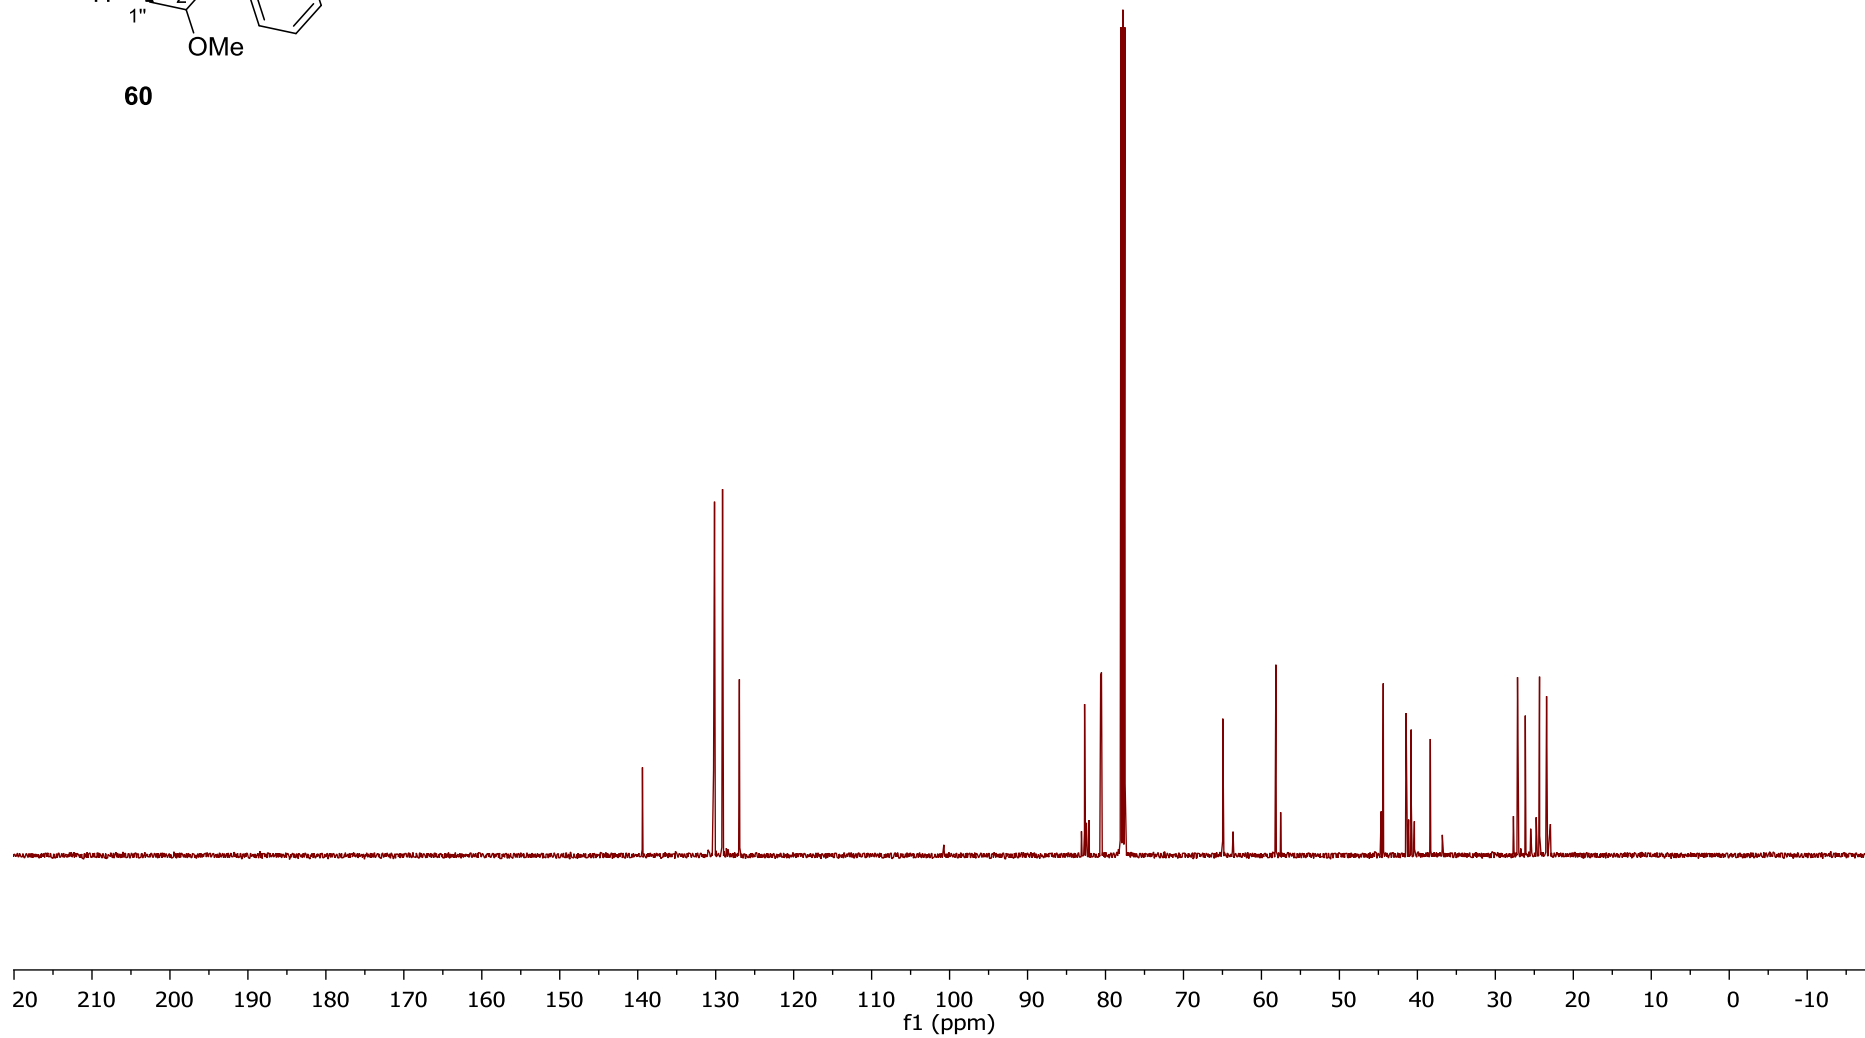

Ethyl (2E)-4-[(1R,3S,3aS,7aR)-3-[[*tert*-Butyldiphenylsilyl]oxy]methyl]-1,3,3a,4,7,7a-hexahydro-2-benzofuran-1-yl]-4-methylpent-2-enoate **61**

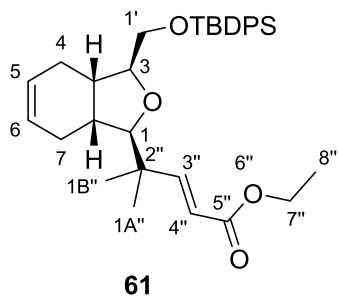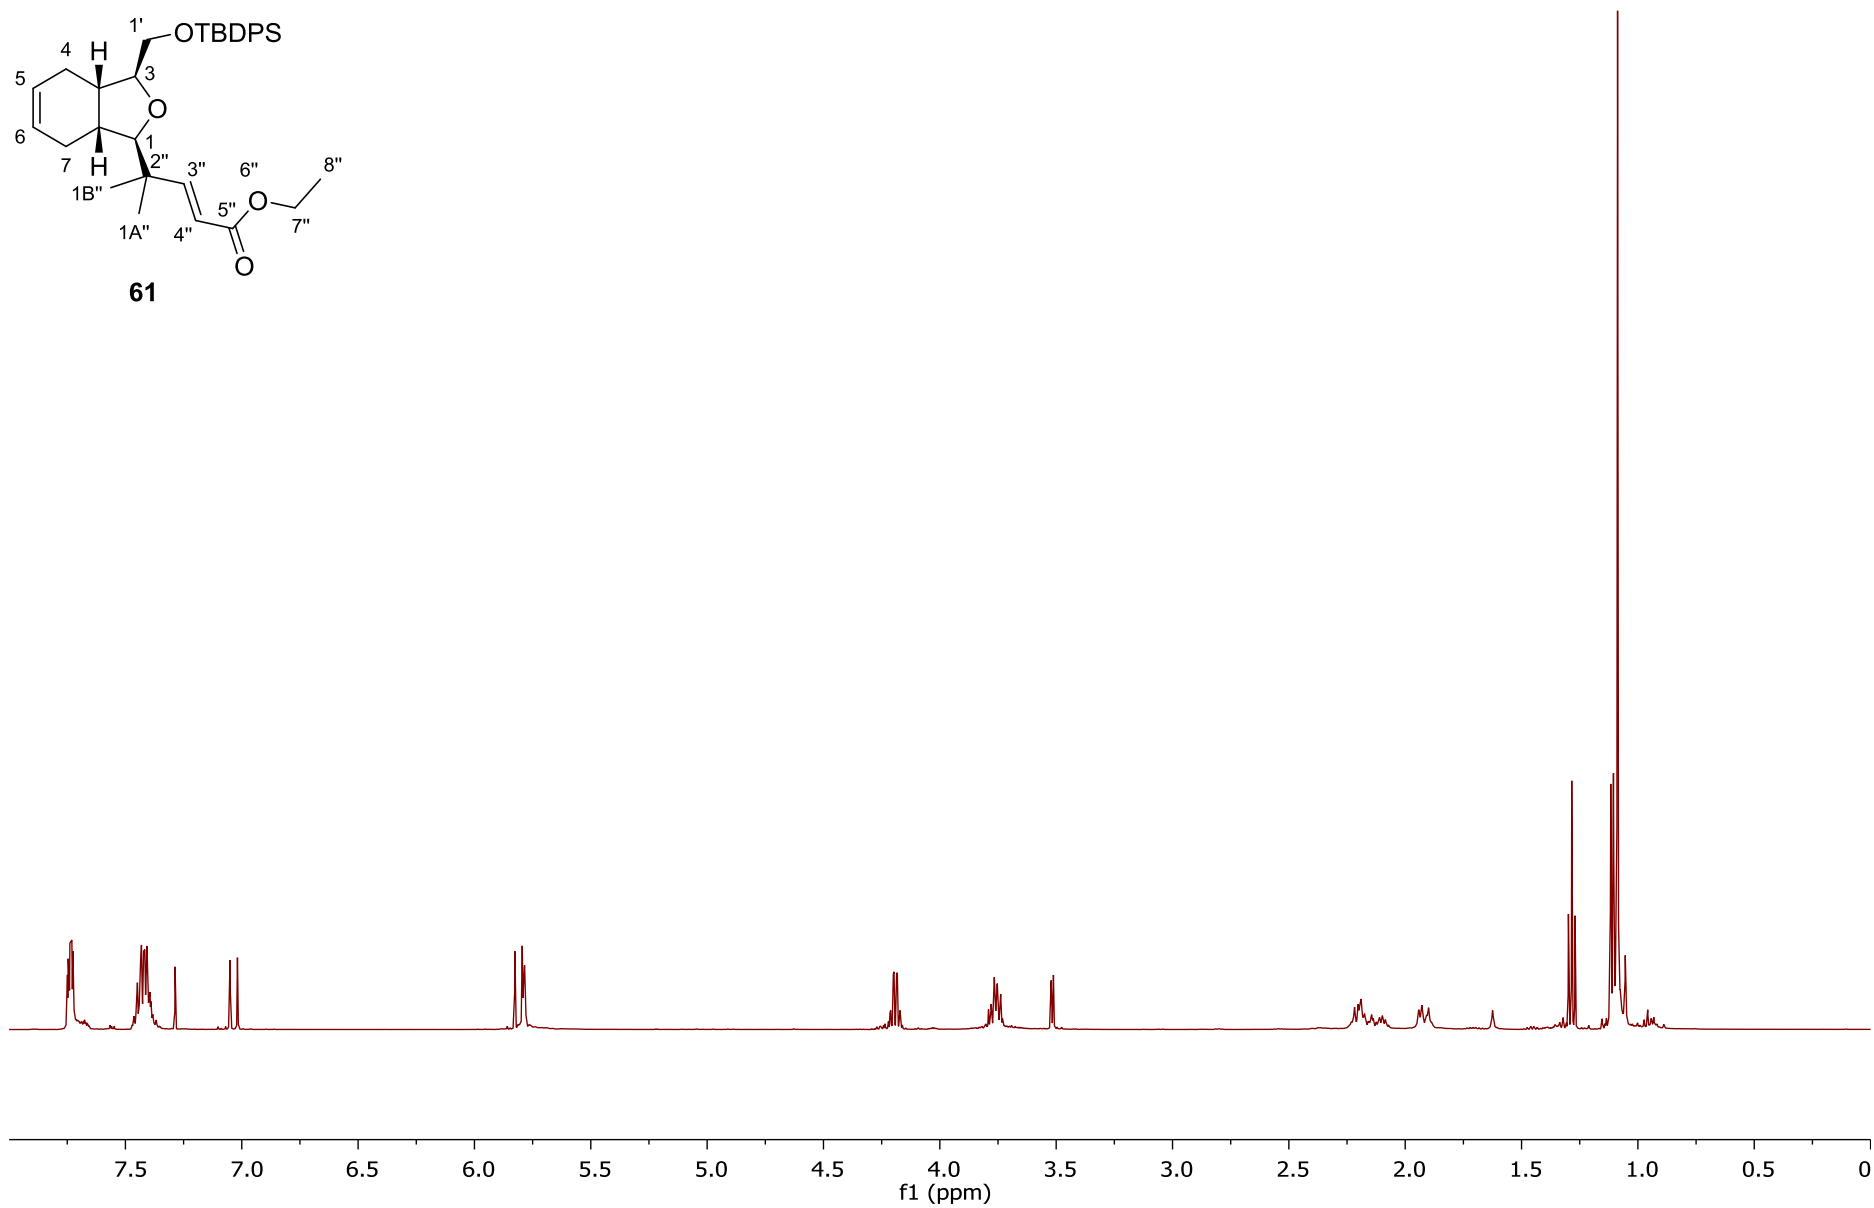





Ethyl 4-[(1R,3S,3aS,7aR)-3-[[*tert*-butyldiphenylsilyl]oxy]methyl]octahydro-2-benzofuran-1-yl]-4-methylpentanoate **62**

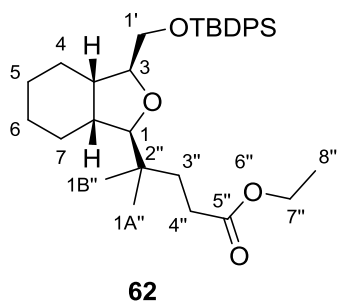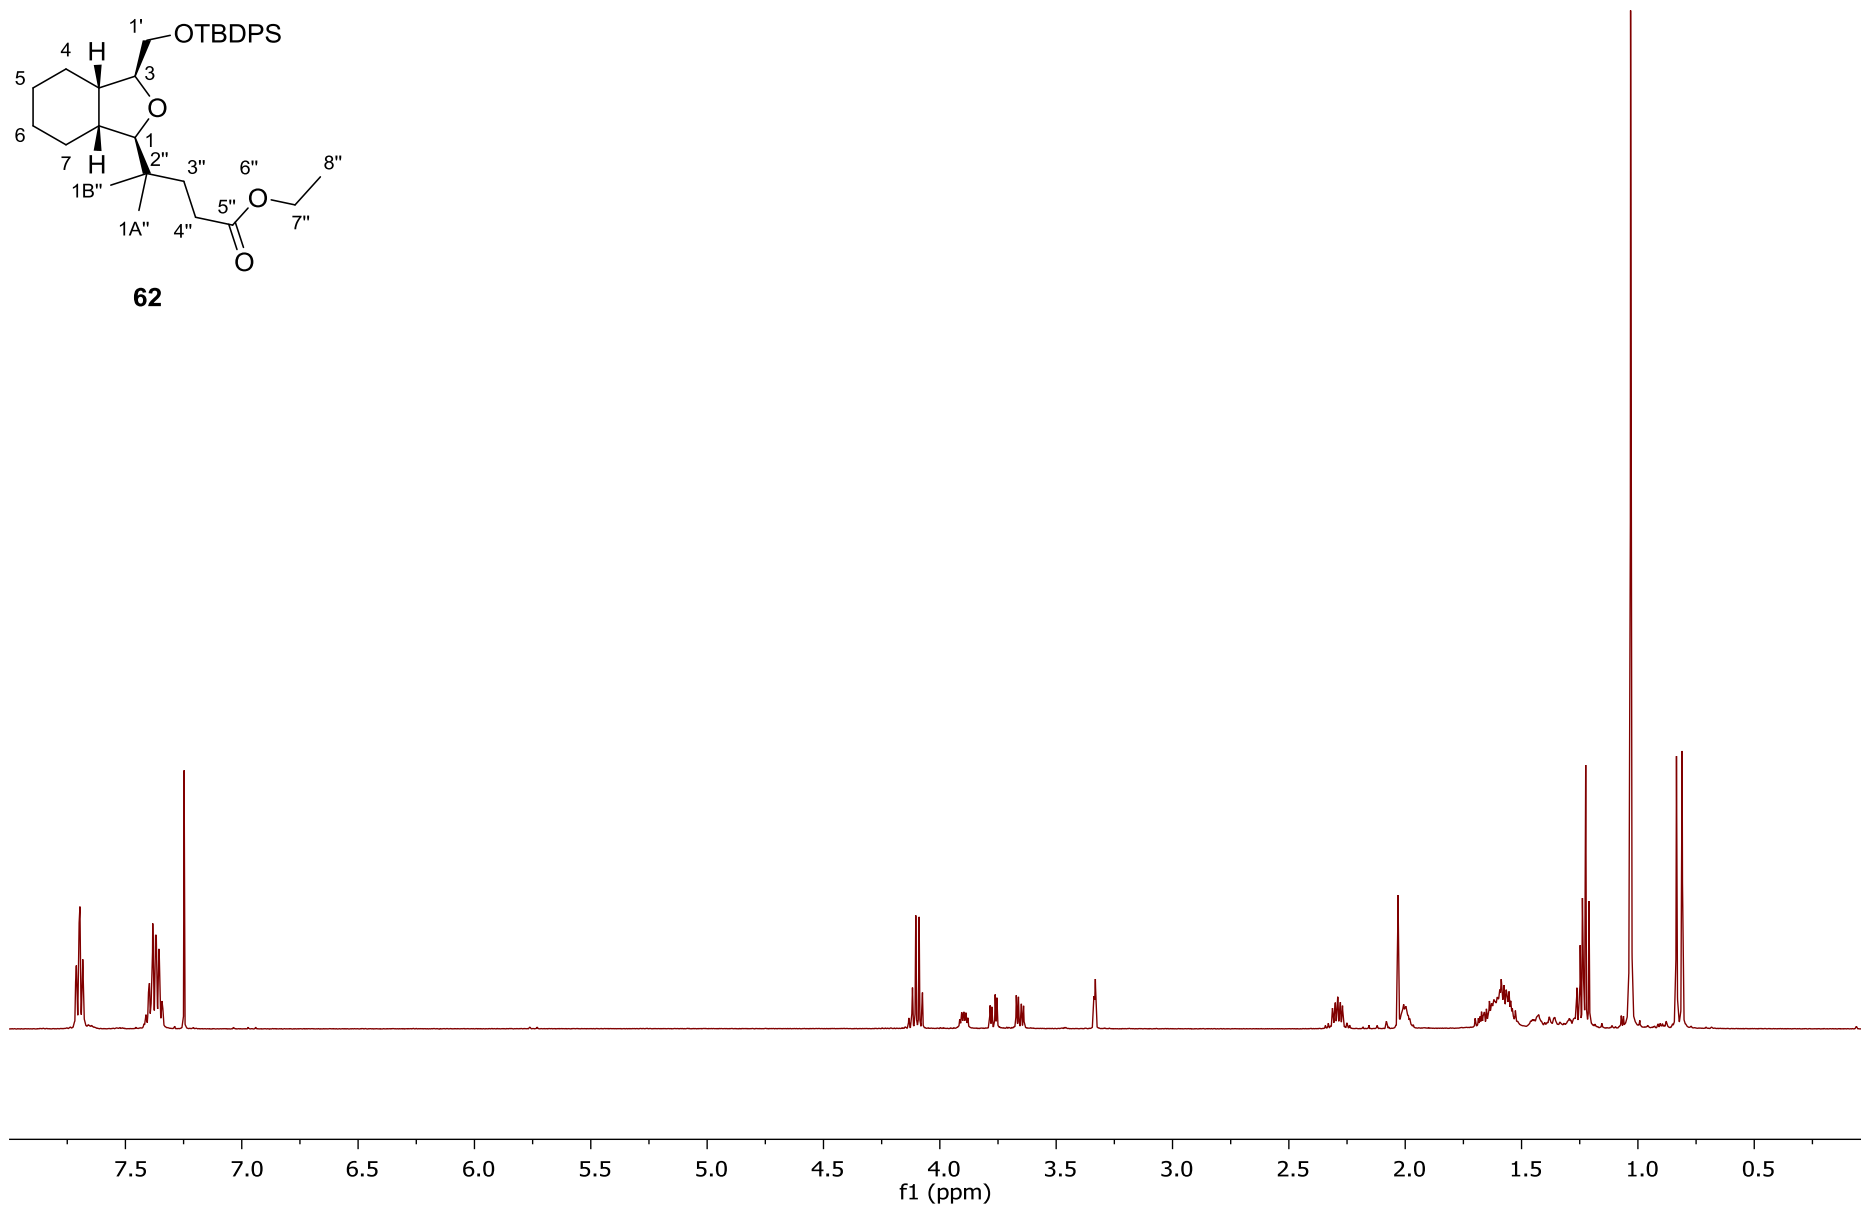

Ethyl 4-[(1R,3S,3aS,7aR)-3-[[*tert*-butyldiphenylsilyl]oxy]methyl]octahydro-2-benzofuran-1-yl]-4-methylpentanoate **62**

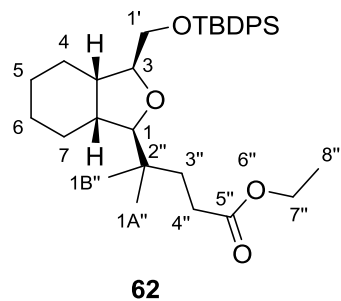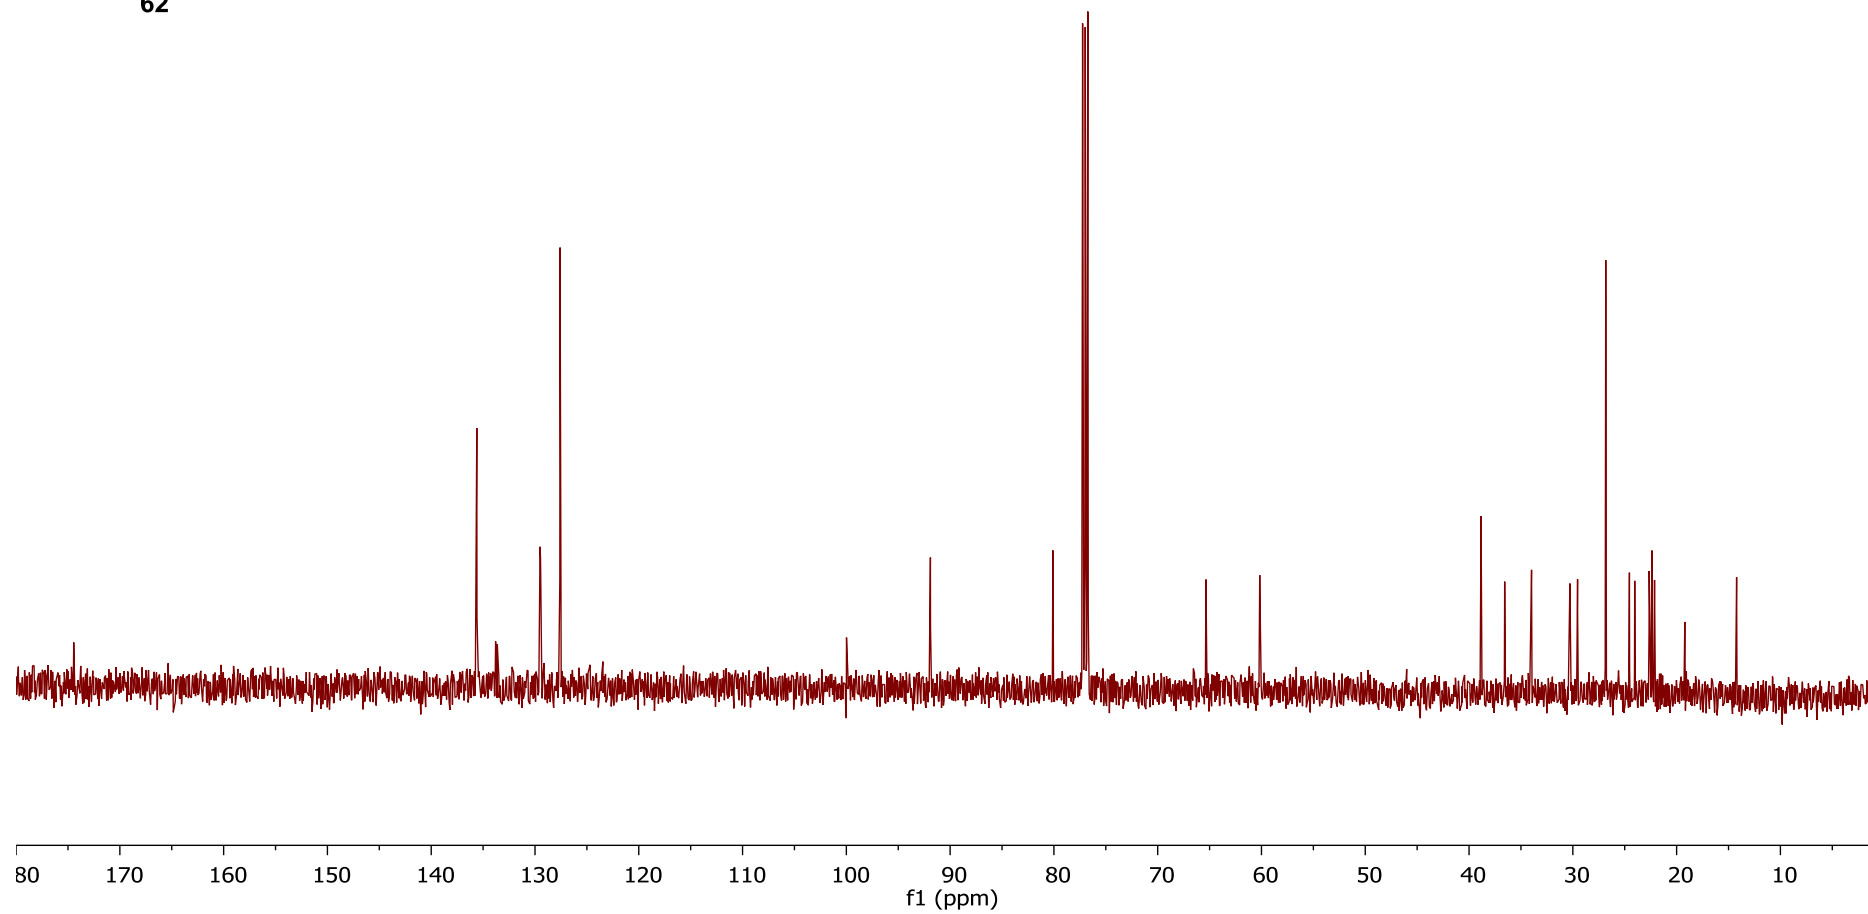

Ethyl 4-[(1R,3S)-3-(hydroxymethyl)octahydro-2-benzofuran-1-yl]-4-methylpentanoate **63**

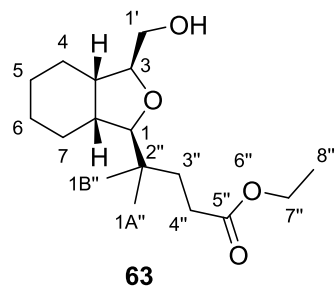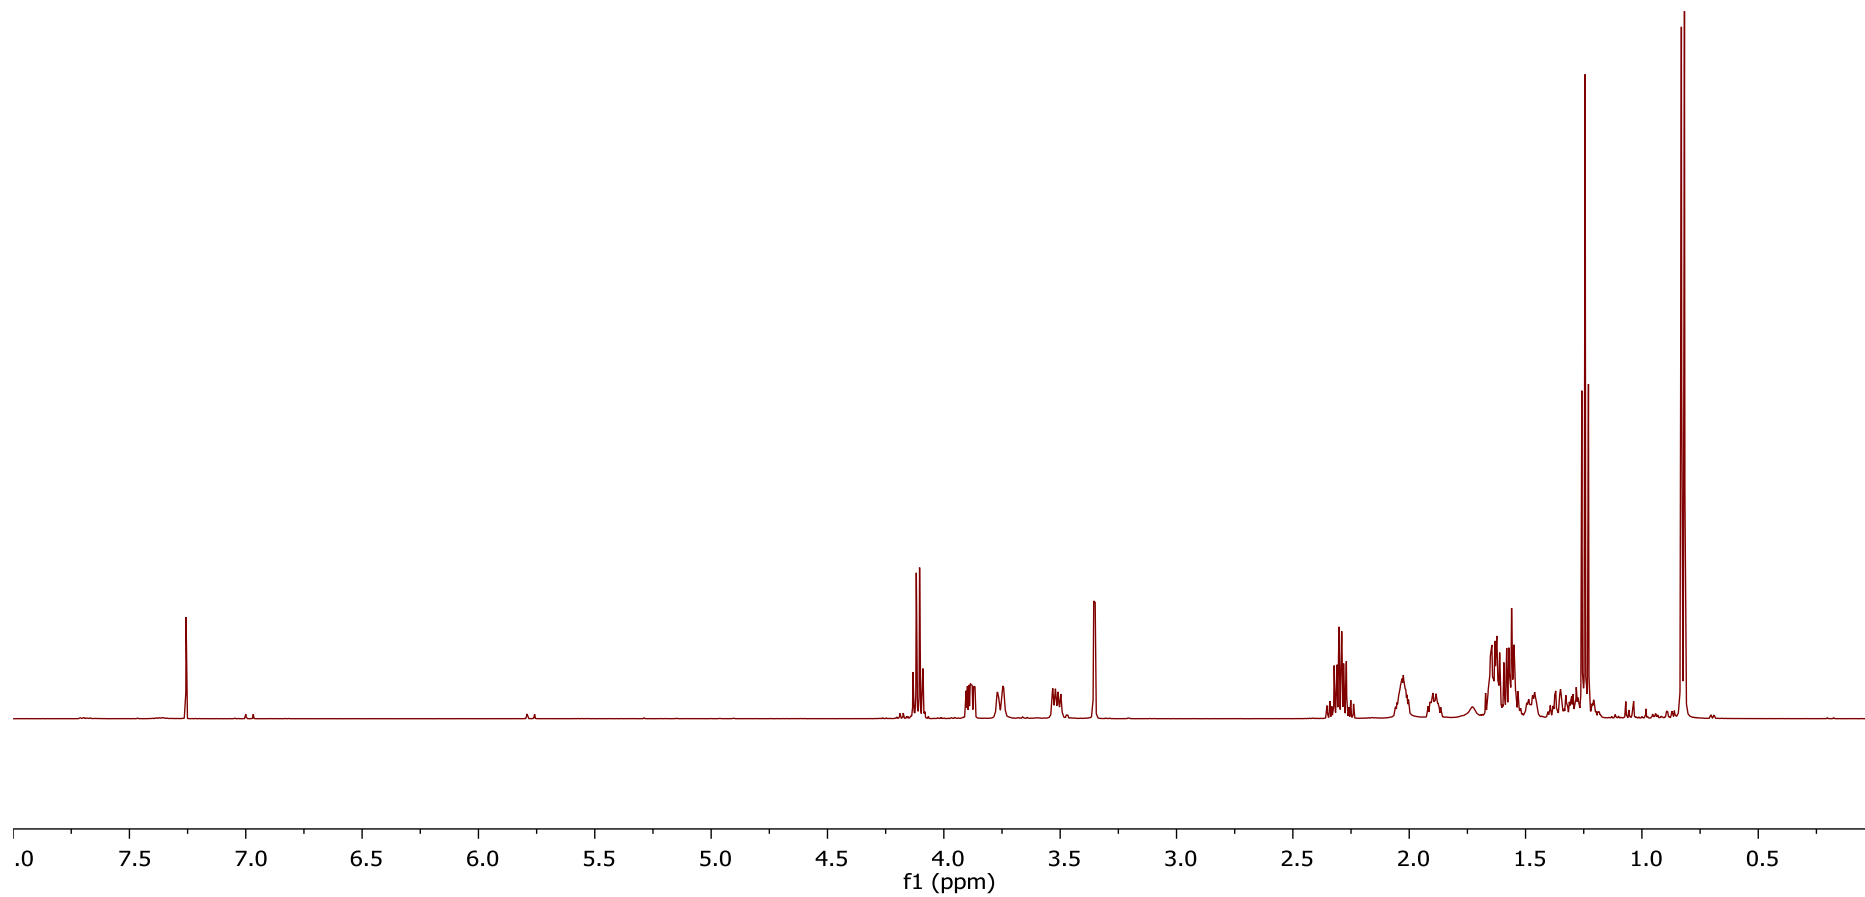

Ethyl 4-[(1R,3S)-3-(hydroxymethyl)octahydro-2-benzofuran-1-yl]-4-methylpentanoate **63**

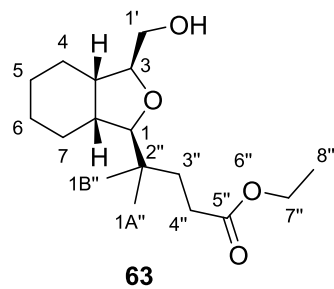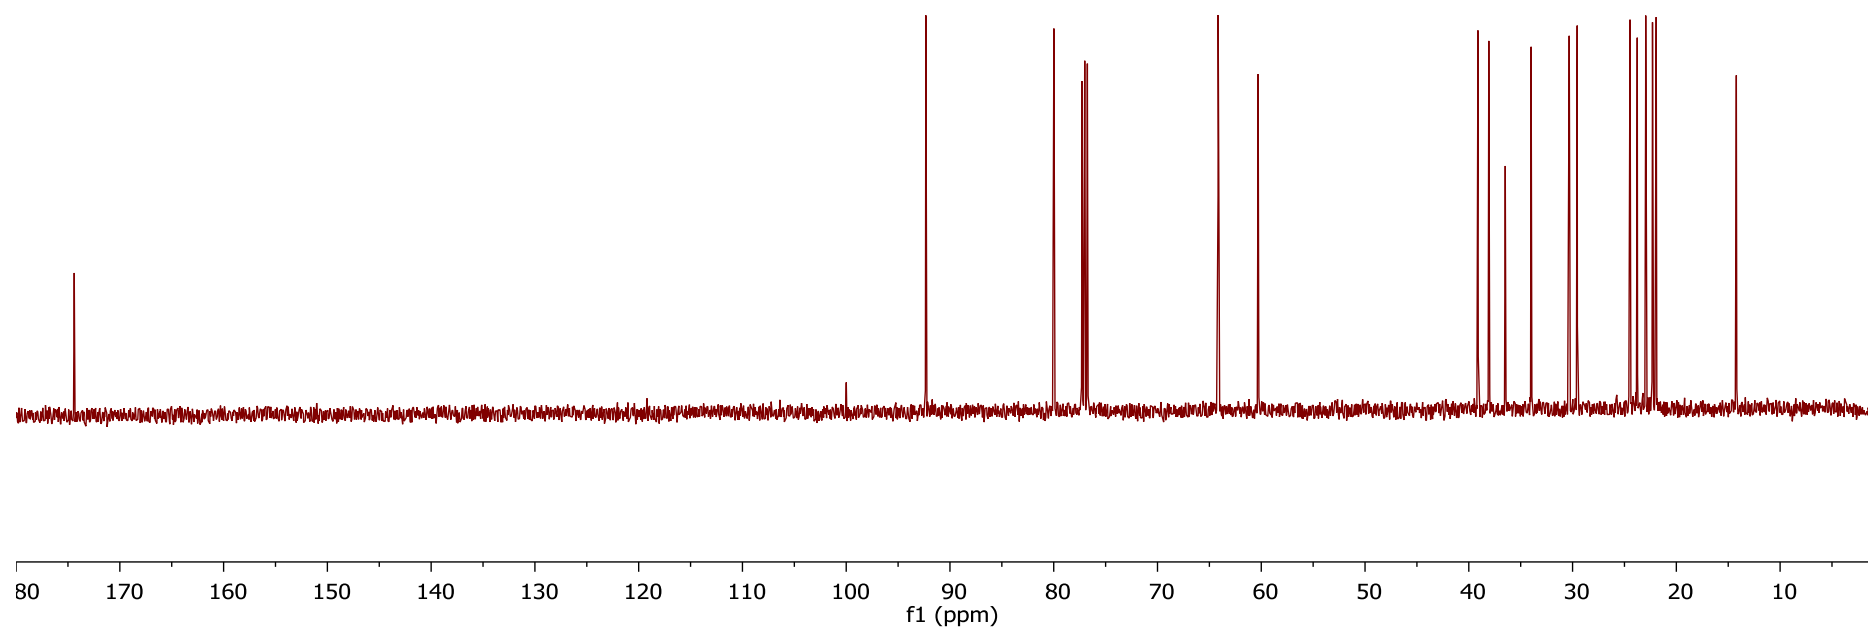

4-[(1R,3S,3aS,7aR)-3-(hydroxymethyl)-octahydro-2-benzofuran-1-yl]-4-methylpentanoic acid **64**

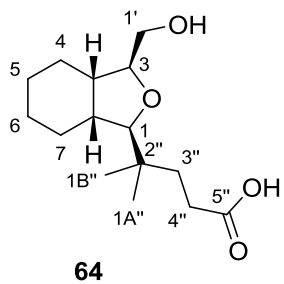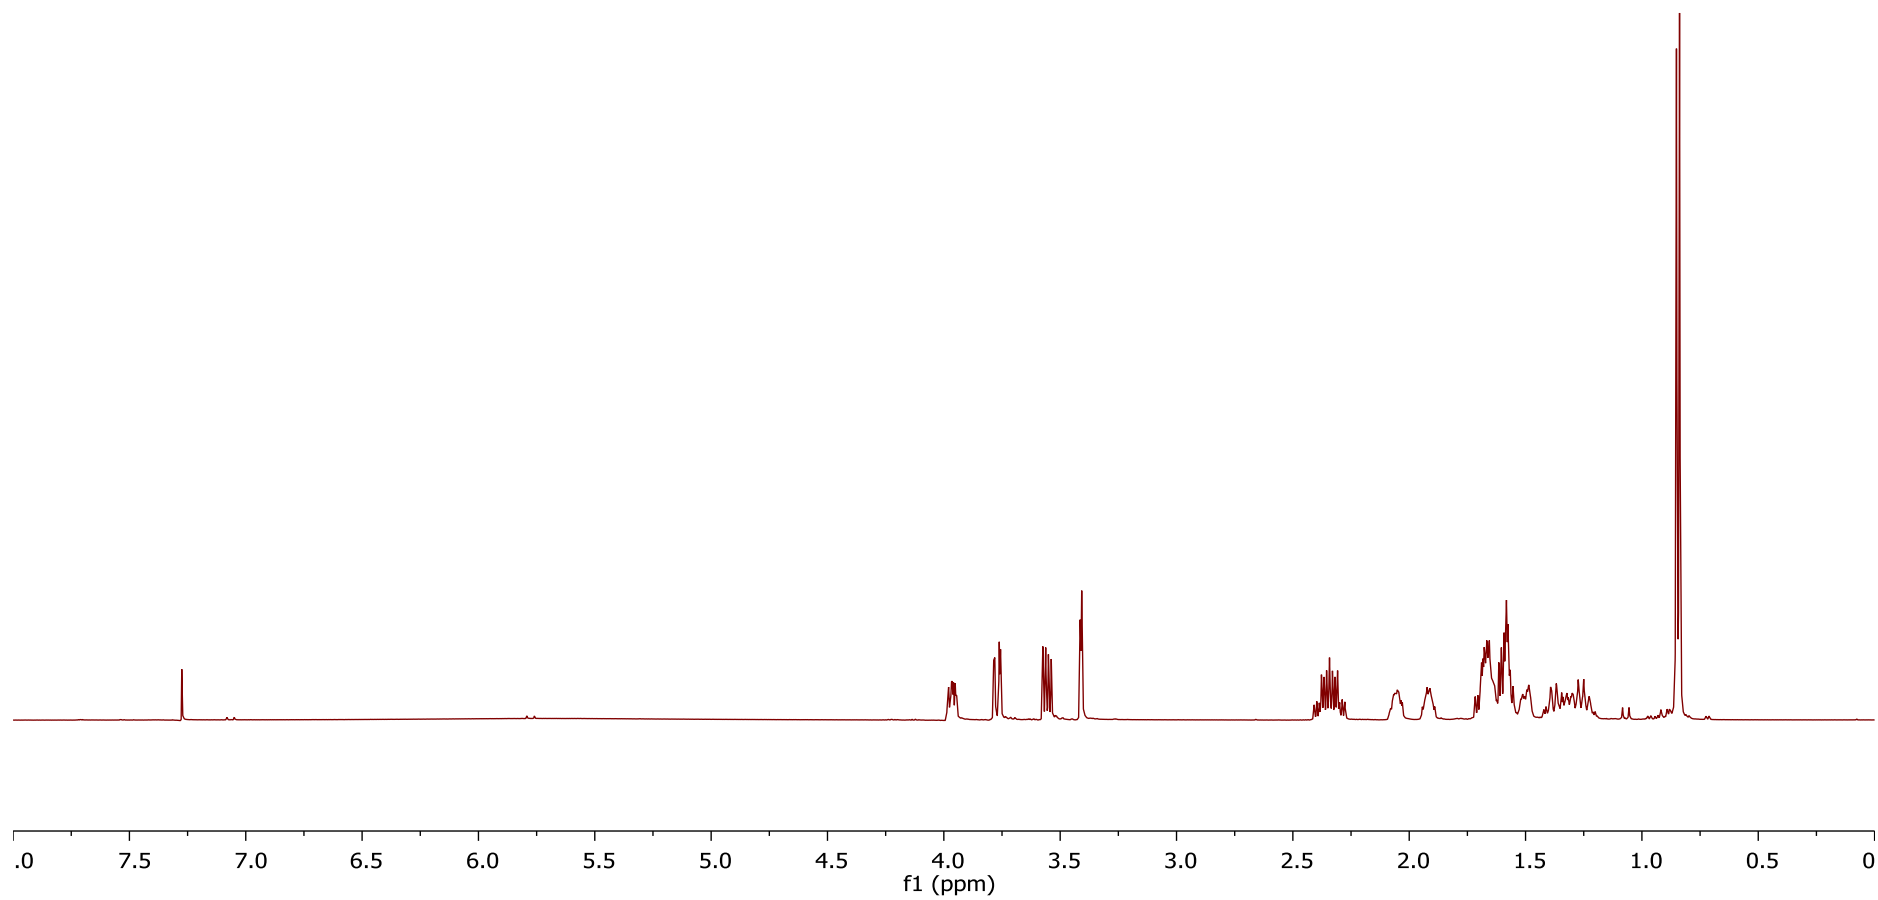

4-[(1R,3S,3aS,7aR)-3-(hydroxymethyl)-octahydro-2-benzofuran-1-yl]-4-methylpentanoic acid **64**

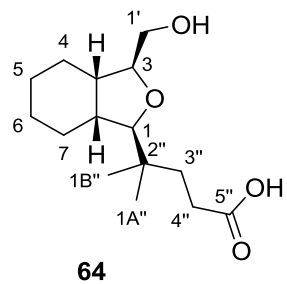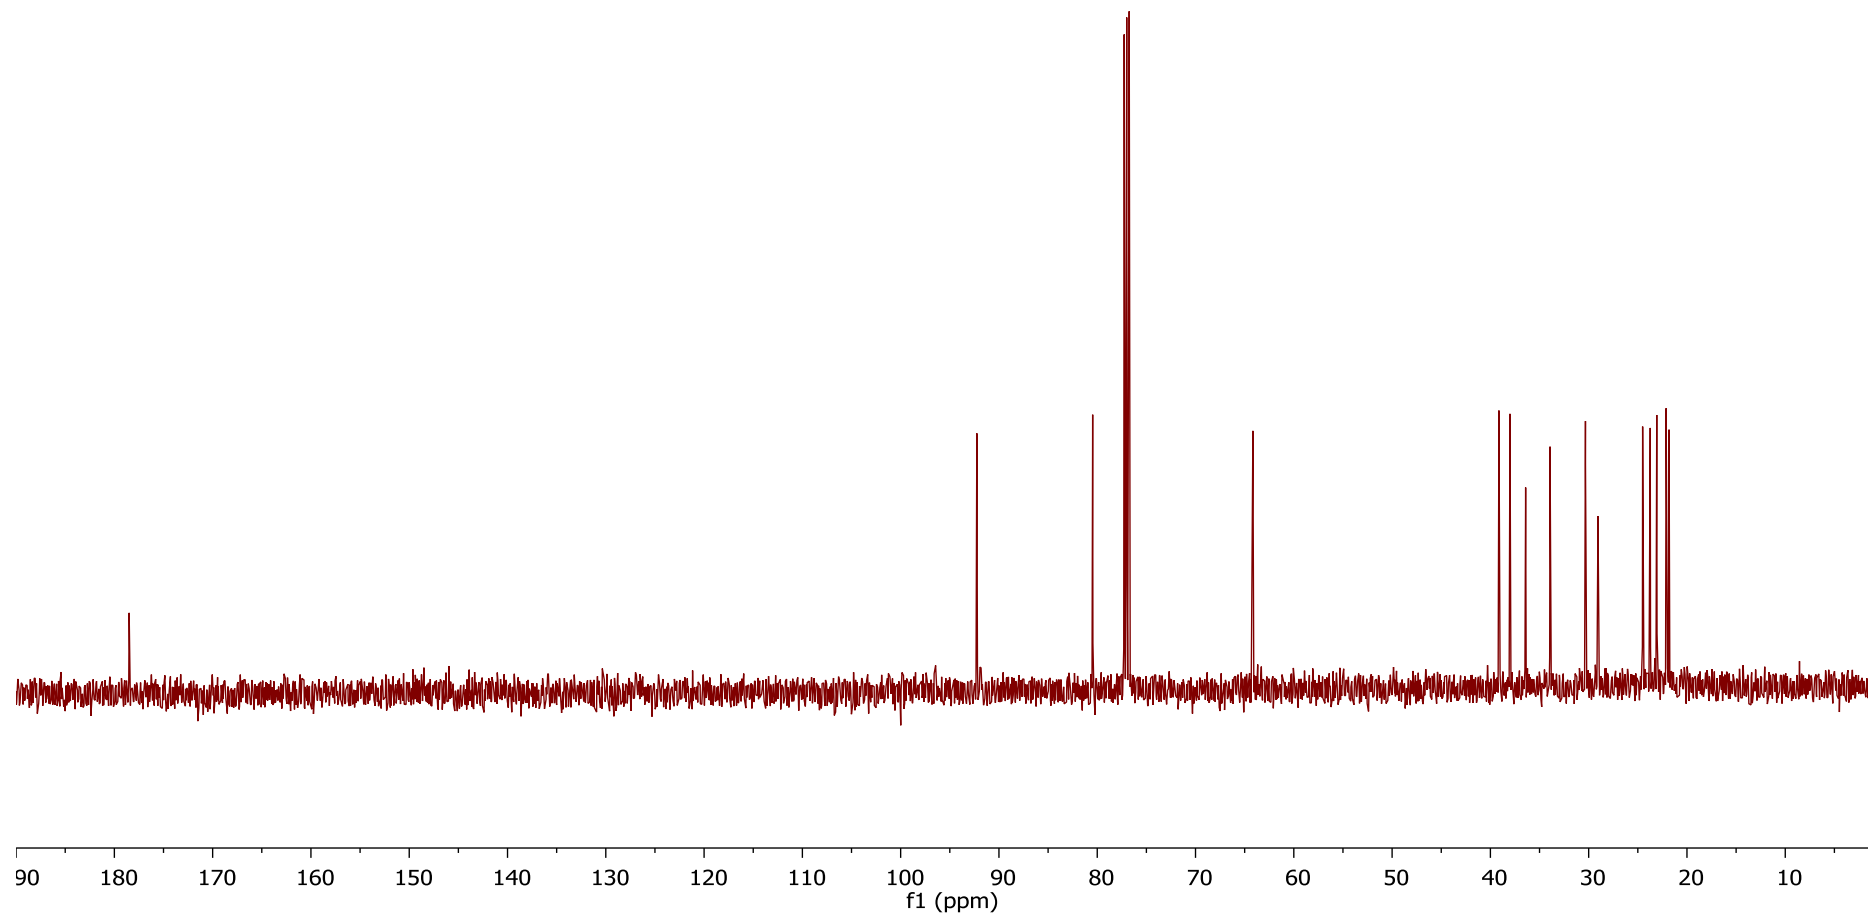

(1R,2R,7S,8S)-14,14-dimethyl-10,15-dioxatricyclo[6.6.1.0<sup>(2,7)</sup>]pentadecan-11-one **65**

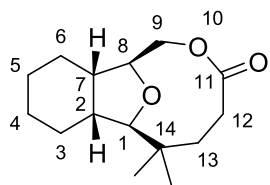

**65**

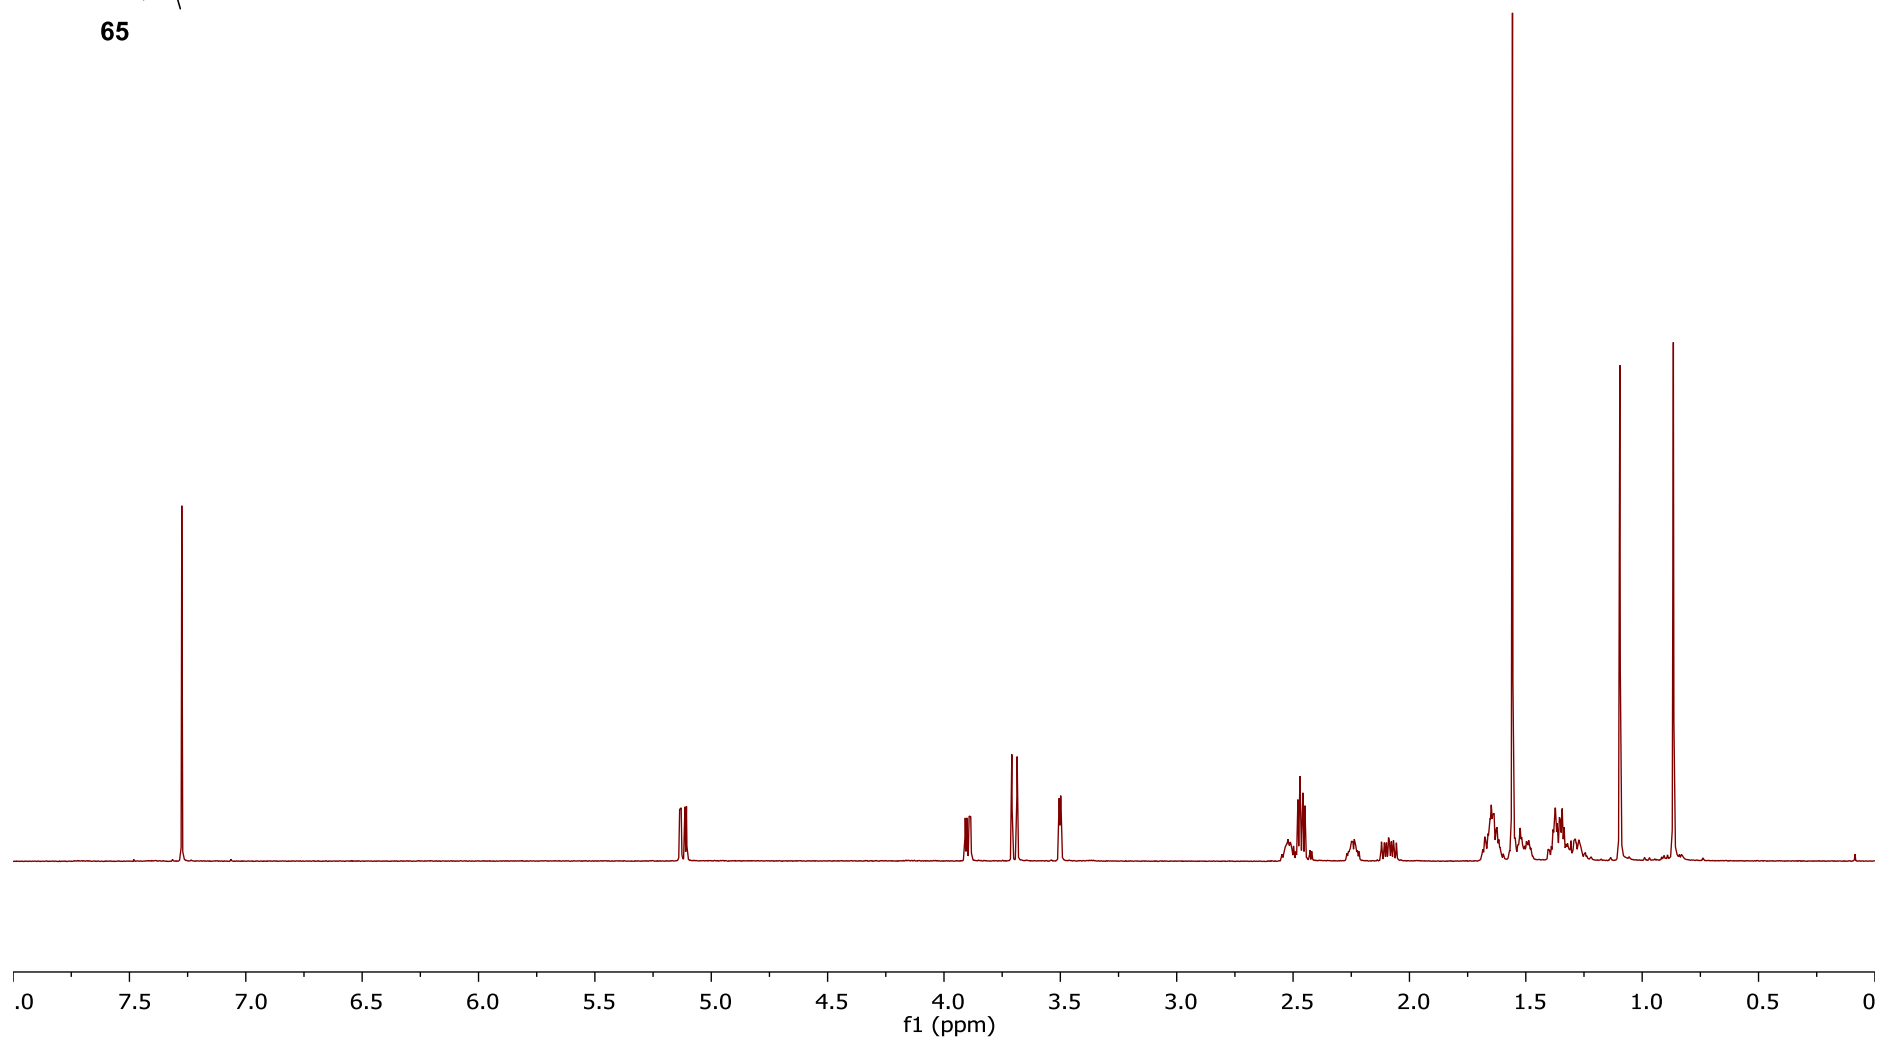

(1R,2R,7S,8S)-14,14-dimethyl-10,15-dioxatricyclo[6.6.1.0<sup>(2,7)</sup>]pentadecan-11-one **65**

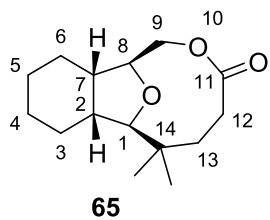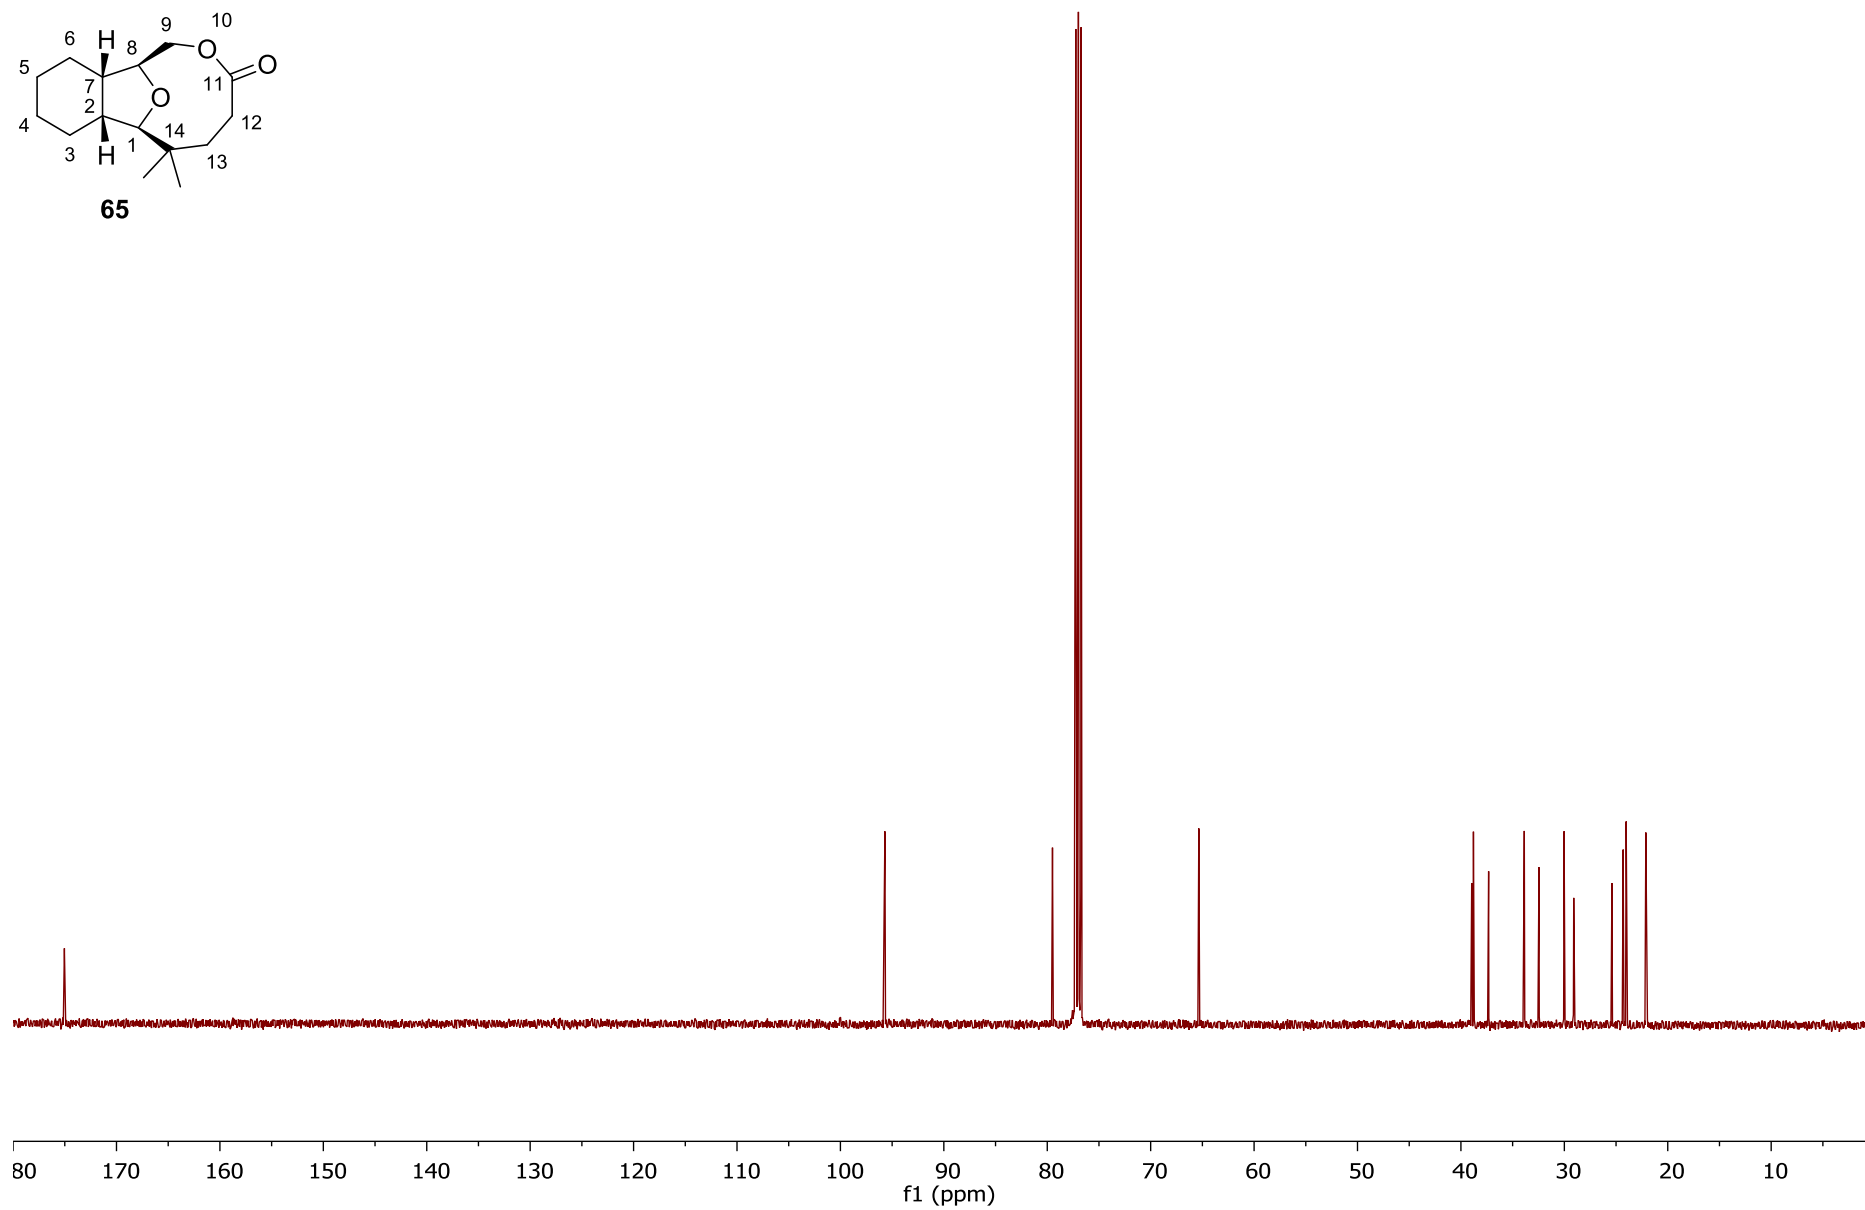



2-[(1R,3S,3aS,7aR)-3-[[*tert*-butyldiphenylsilyl]oxy]methyl]-octahydro-2-benzofuran-1-yl]-2-methylpropanal **66**

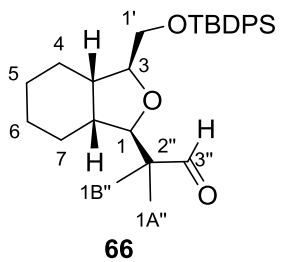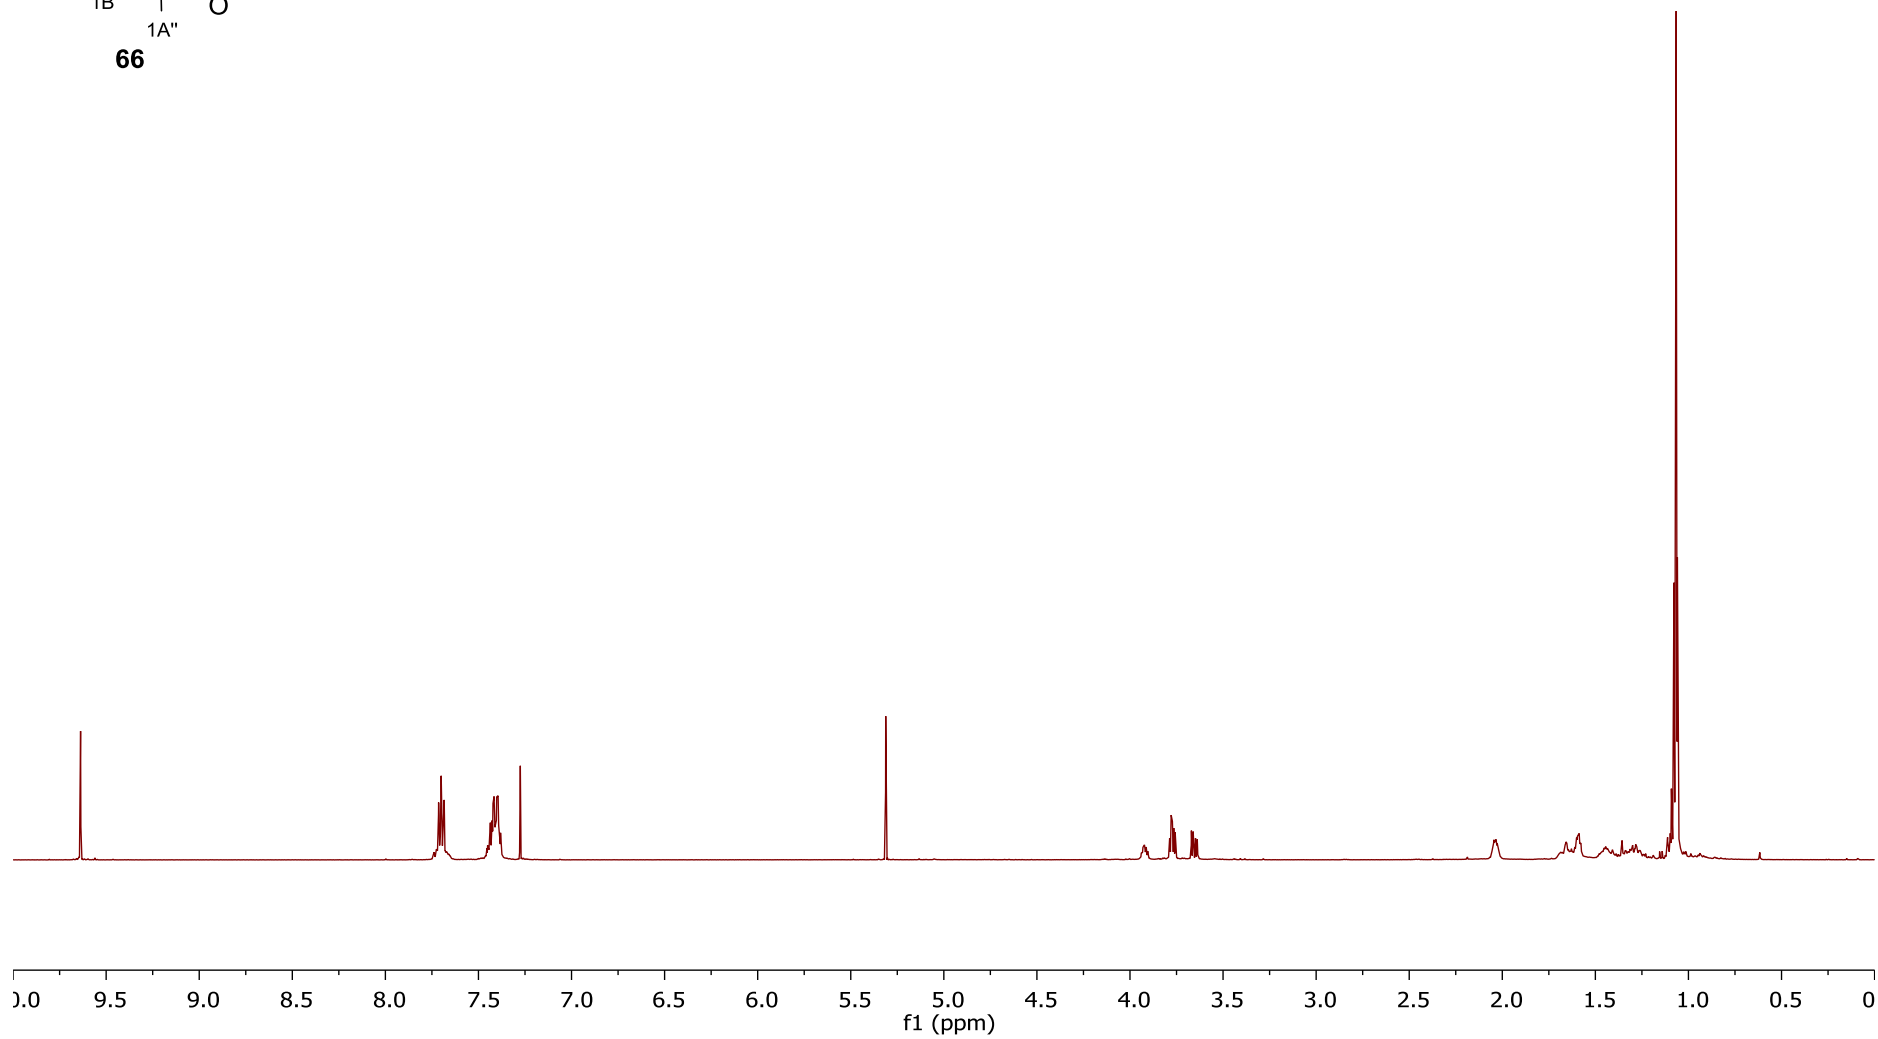

2-[(1R,3S,3aS,7aR)-3-[[*tert*-butyldiphenylsilyl]oxy]methyl]-octahydro-2-benzofuran-1-yl]-2-methylpropanal **66**

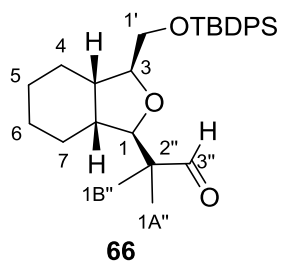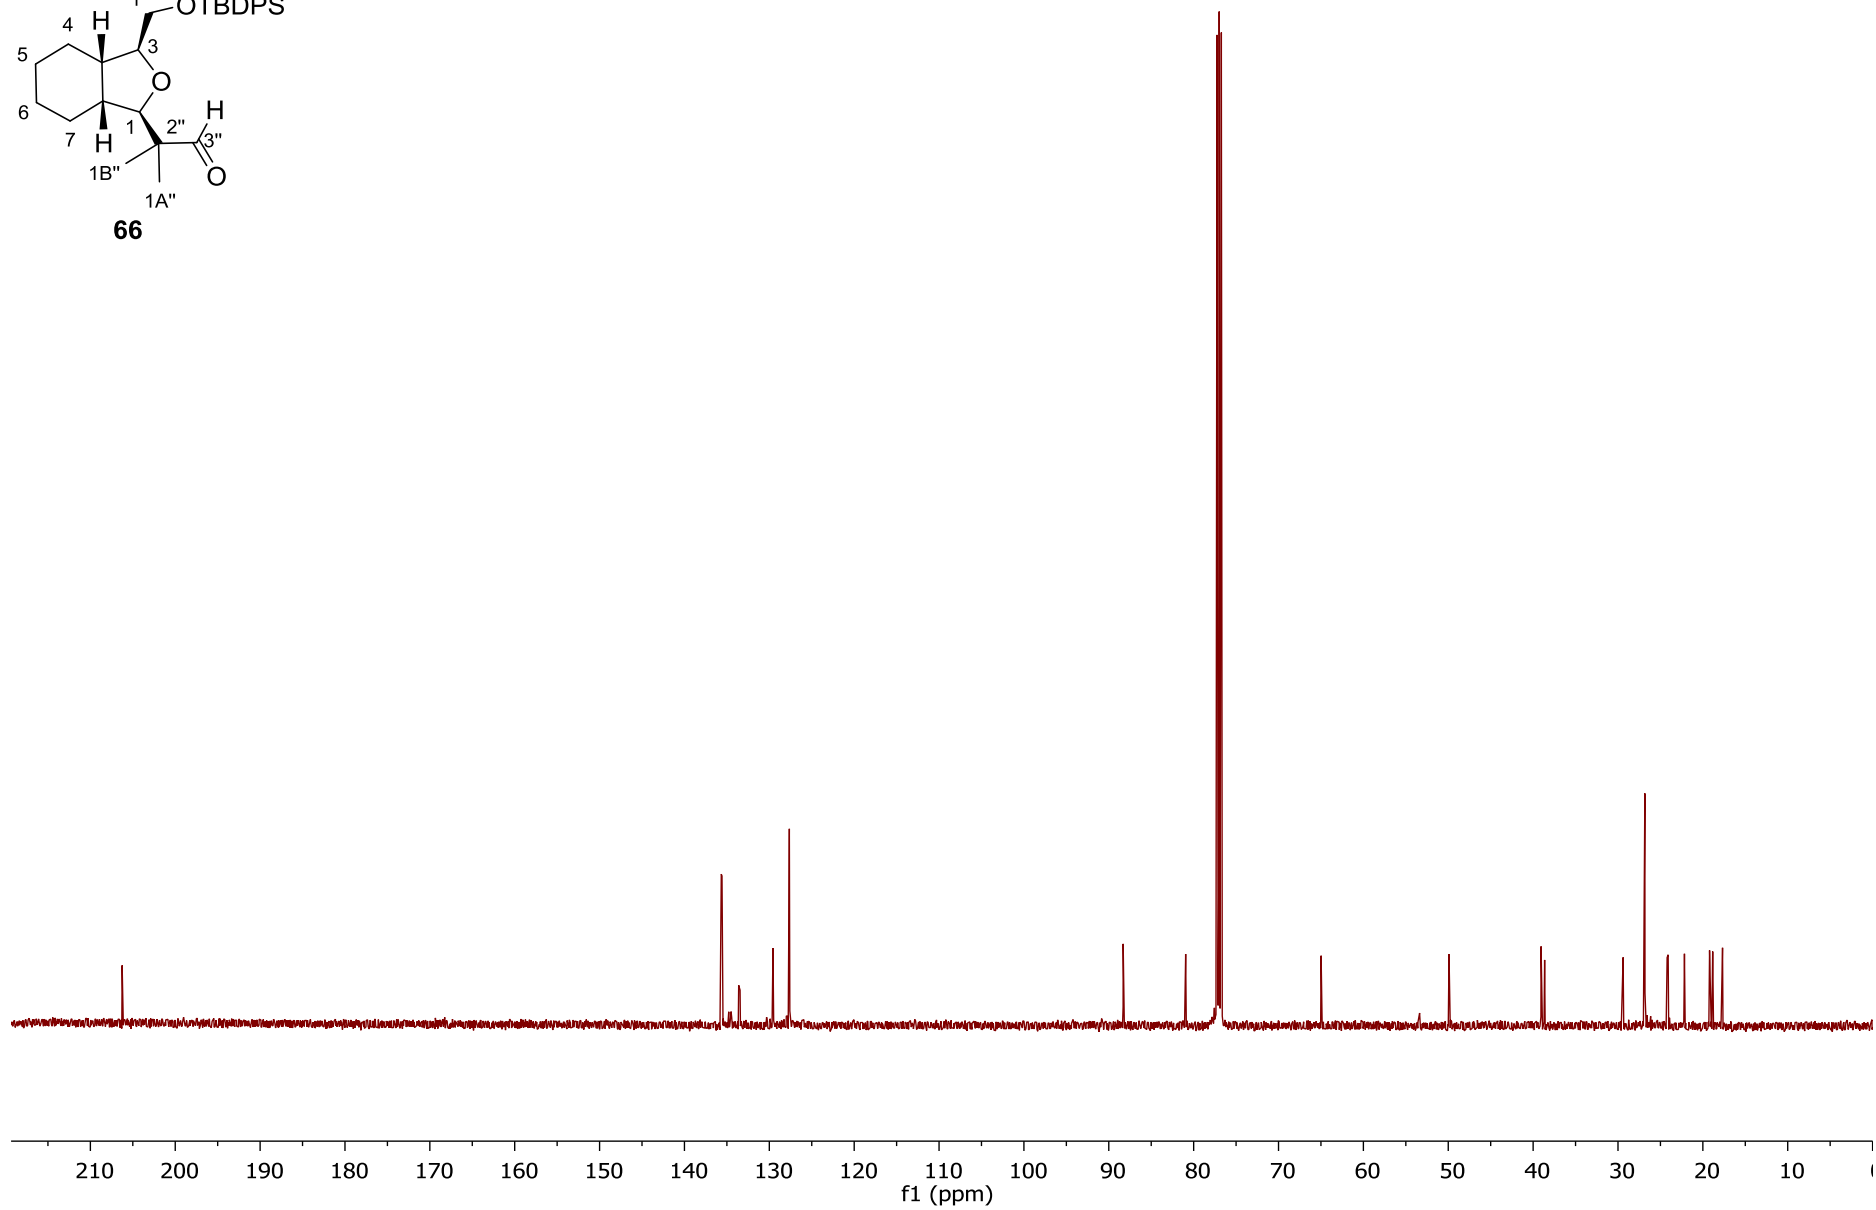

[(1S,3R,3aR,7aS)-3-(2-methyl-1-oxopropan-2-yl)octahydro-2-benzofuran-1-yl]methyl 2-bromoacetate **68**

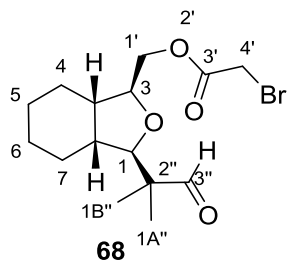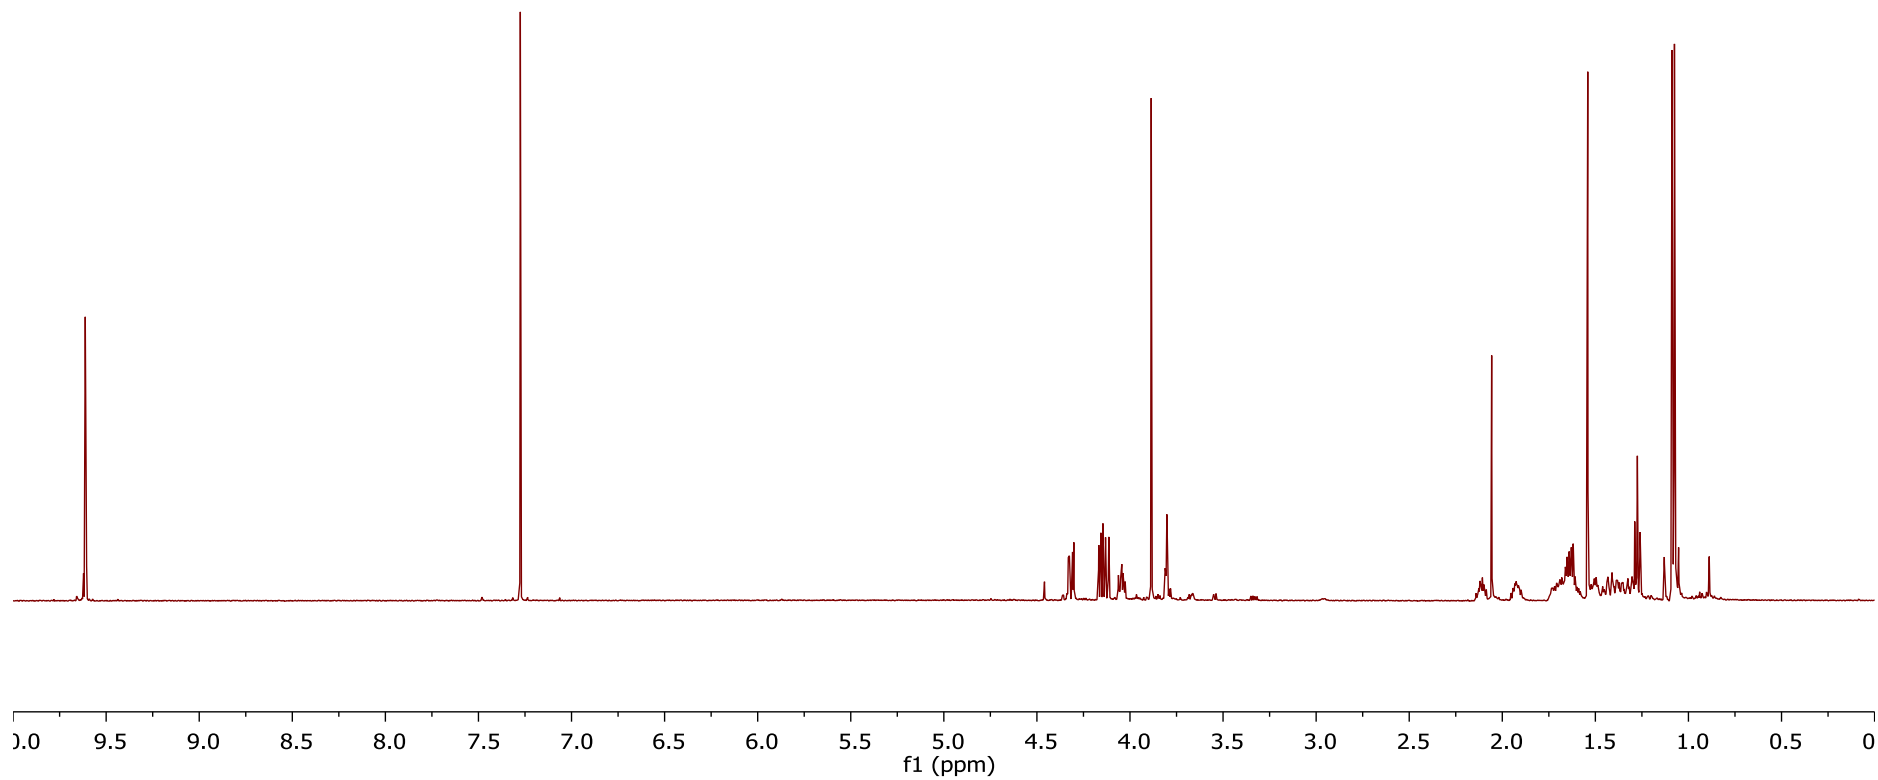

(1R,2R,7S,8S,13R)-13-hydroxy-14,14-dimethyl-10,15-dioxatricyclo[6.6.1.0<sup>2,7</sup>]pentadecan-11-one **69**

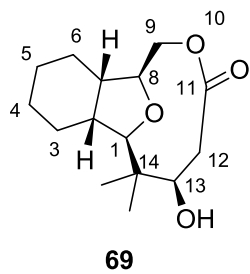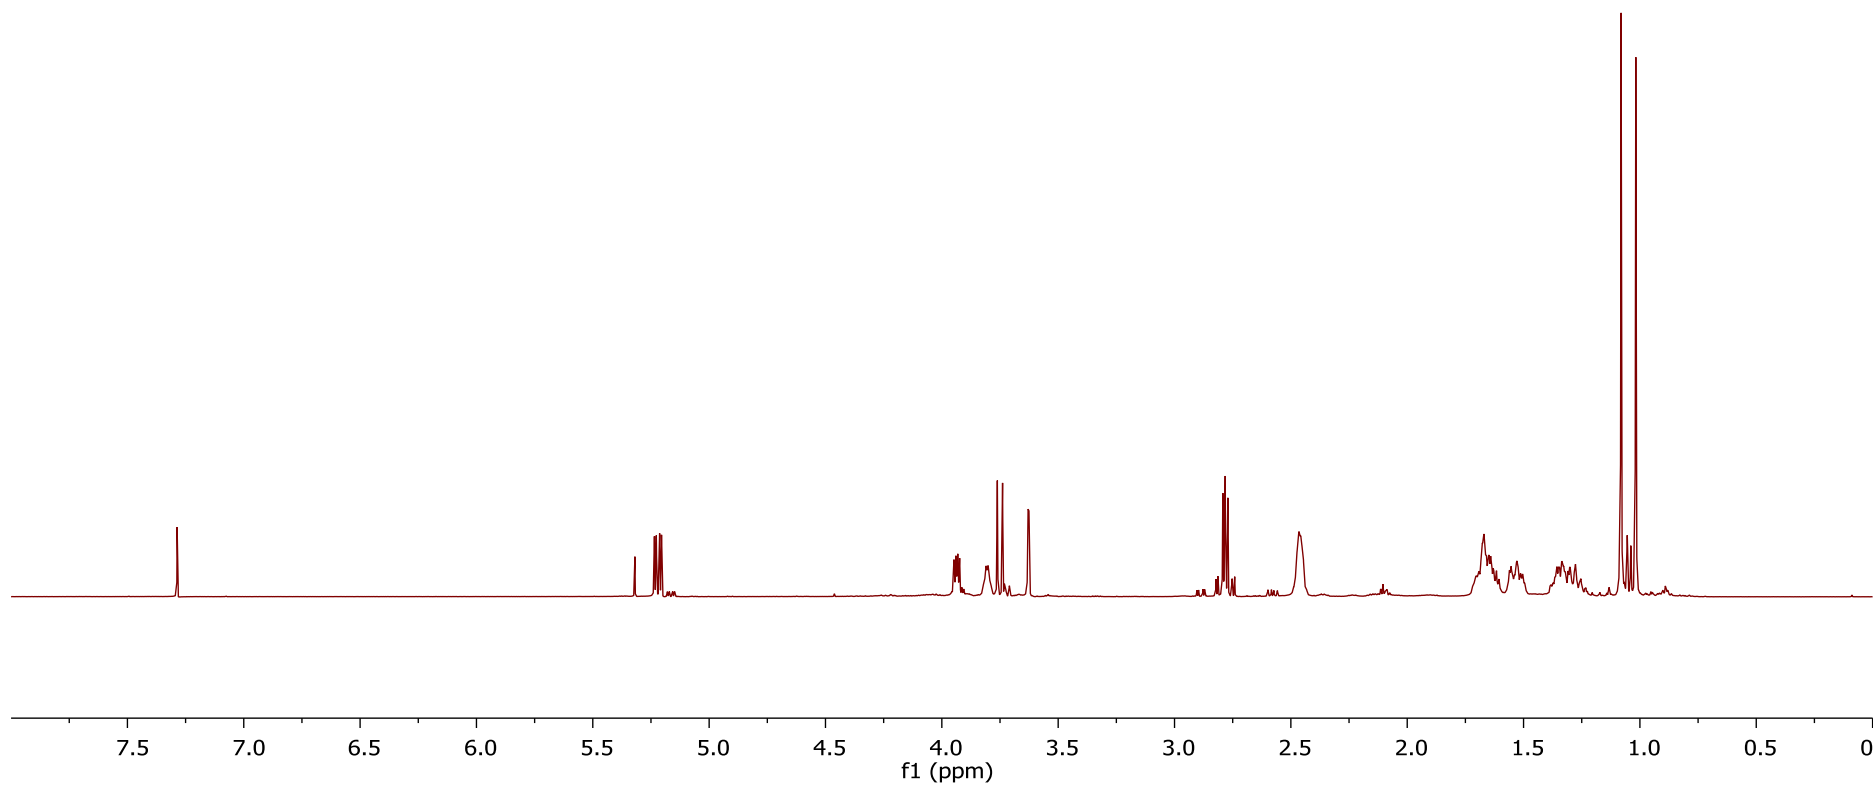

(1R,2R,7S,8S,13R)-13-hydroxy-14,14-dimethyl-10,15-dioxatricyclo[6.6.1.0<sup>{2,7}</sup>]pentadecan-11-one **69**

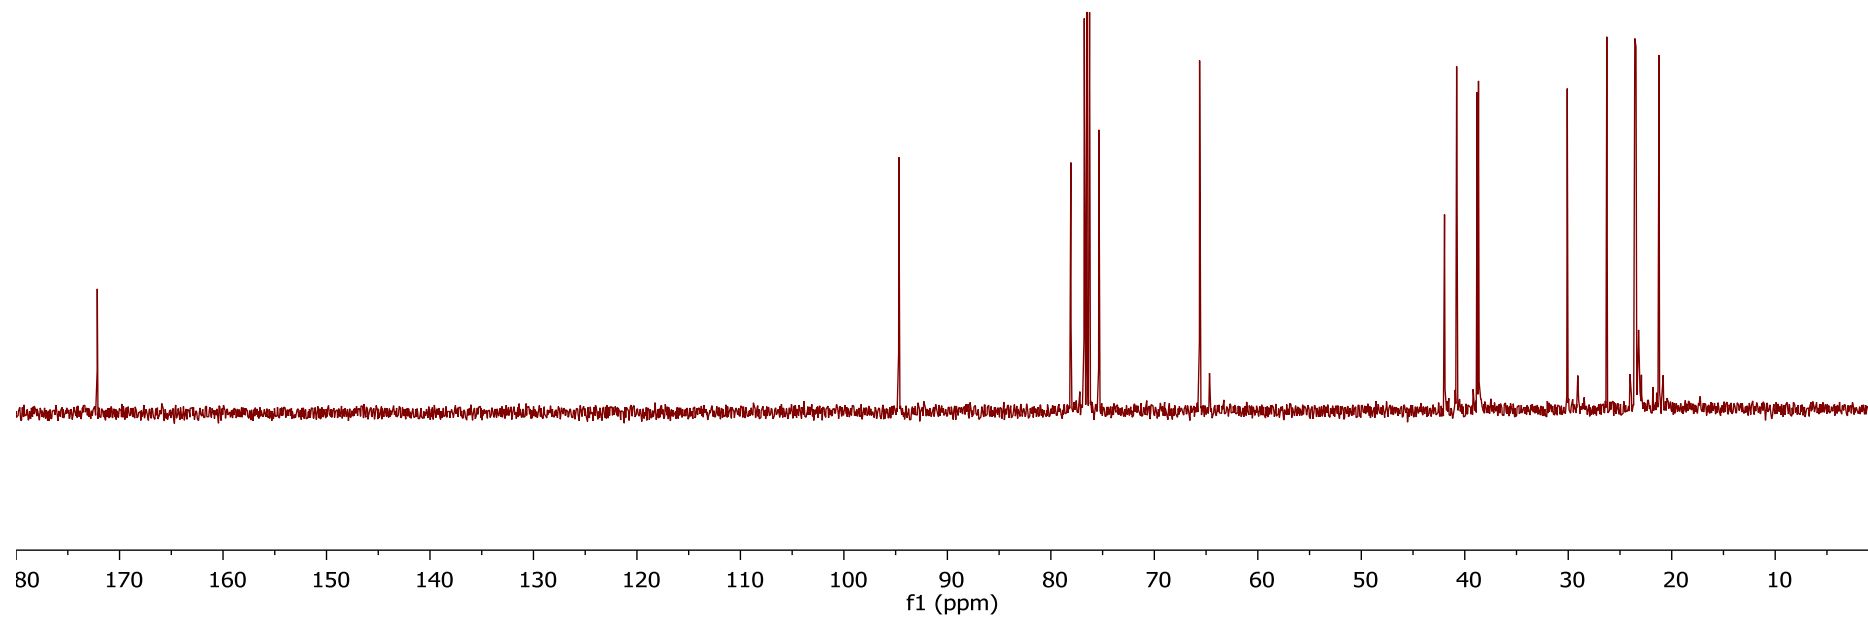

(1R,2R,7S,8S,13R)-14,14-dimethyl-11-oxo-10,15-dioxatricyclo[6.6.1.0<sup>2,7</sup>]pentadecan-13-yl acetate **70**

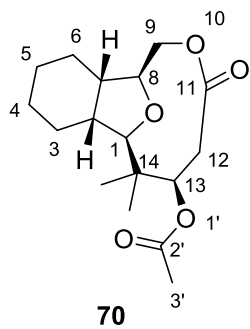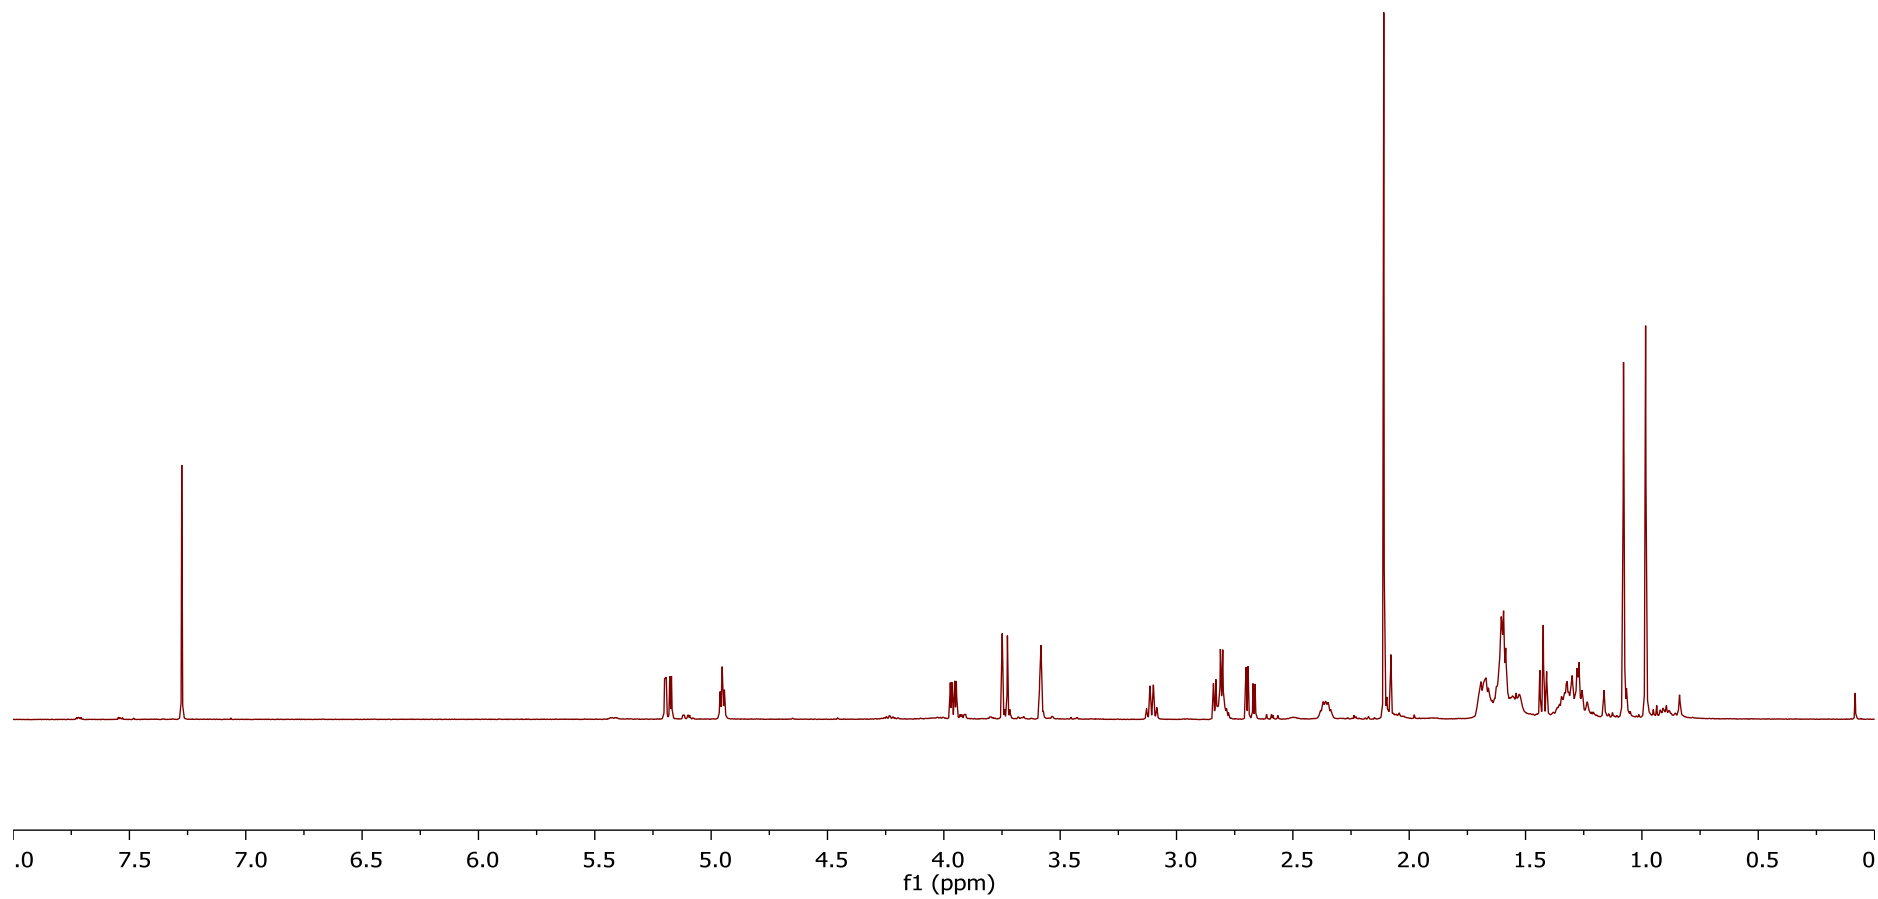

(1R,2R,7S,8S,13R)-14,14-dimethyl-11-oxo-10,15-dioxatricyclo[6.6.1.0<sup>2,7</sup>]pentadecan-13-yl acetate **70**

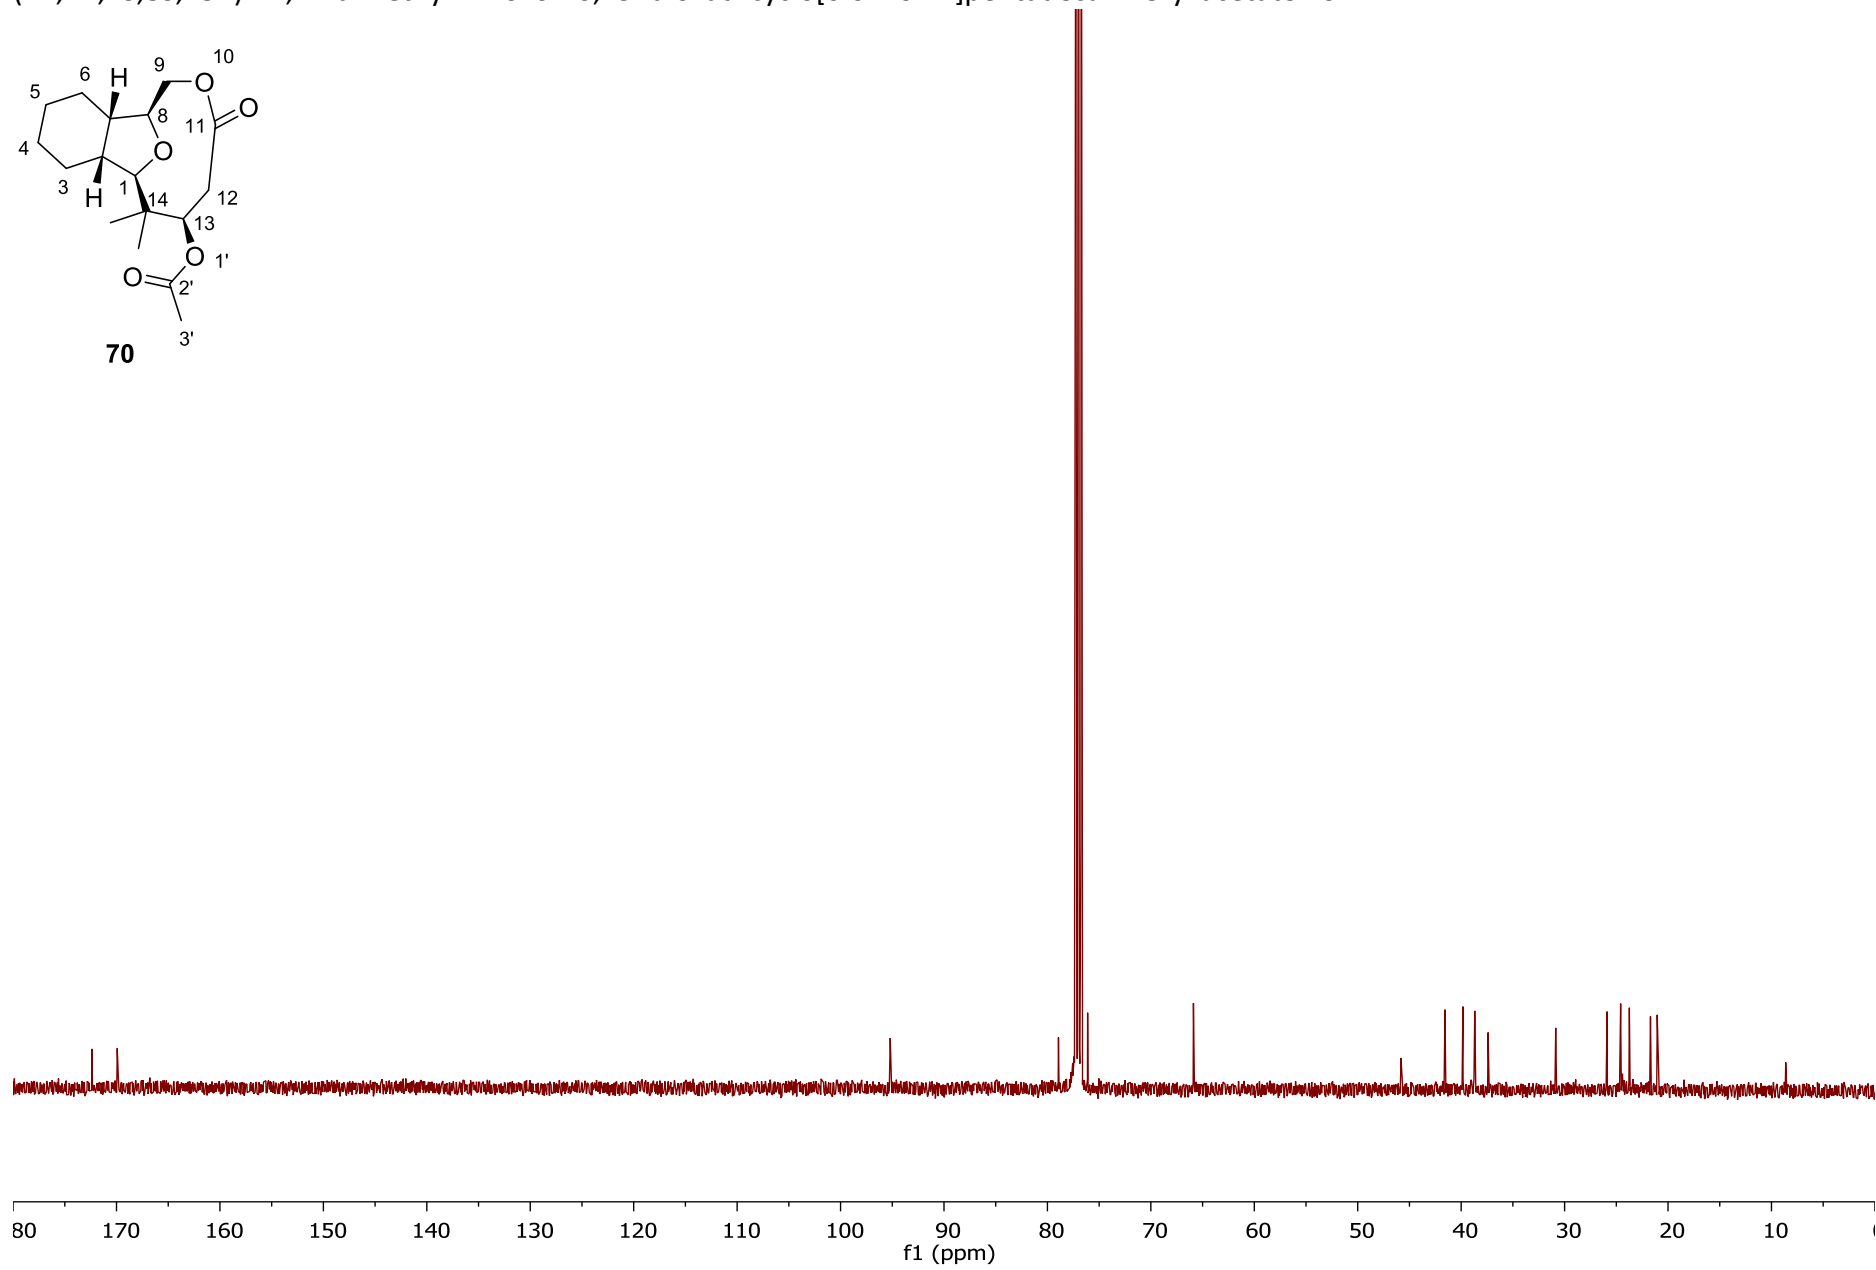

(1S,3S,3aR,7aS)-3-(Prop-2-en-1-yl)-octahydro-2-benzofuran-1-carbaldehyde **71**

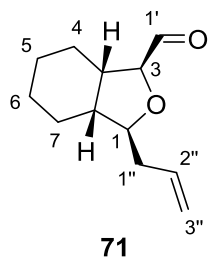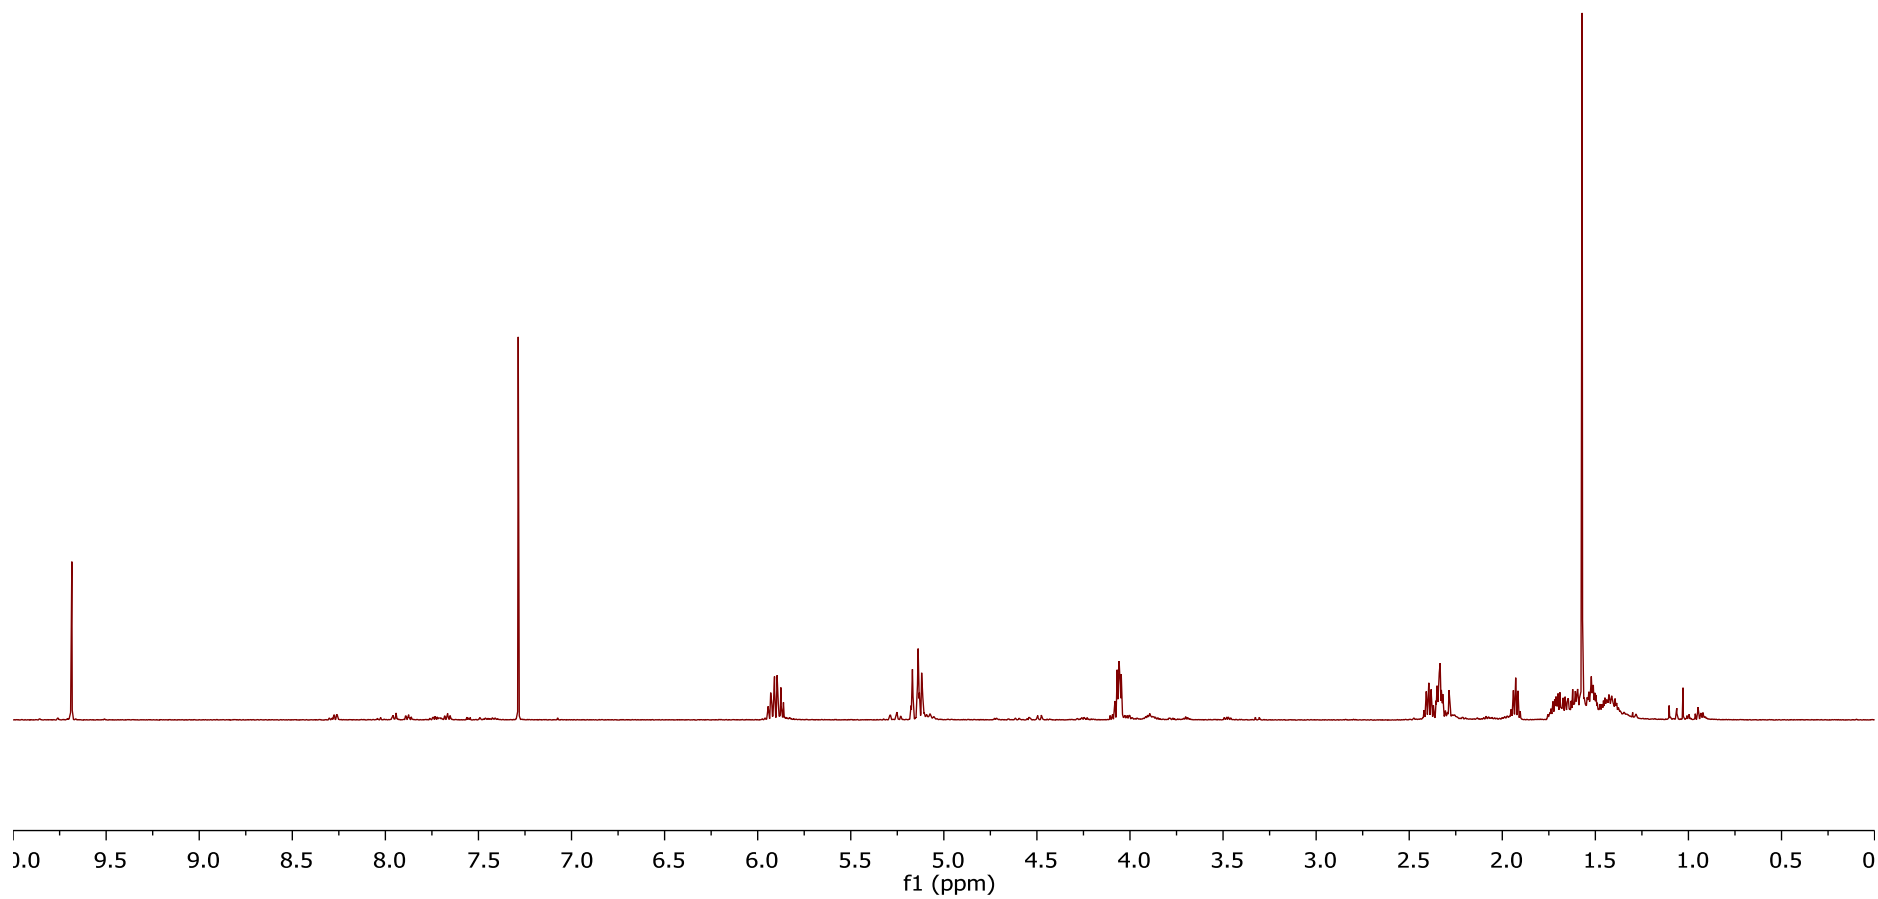



(1S,3S,3aR,7aS)-3-(Prop-2-en-1-yl)-octahydro-2-benzofuran-1-carbaldehyde **71**

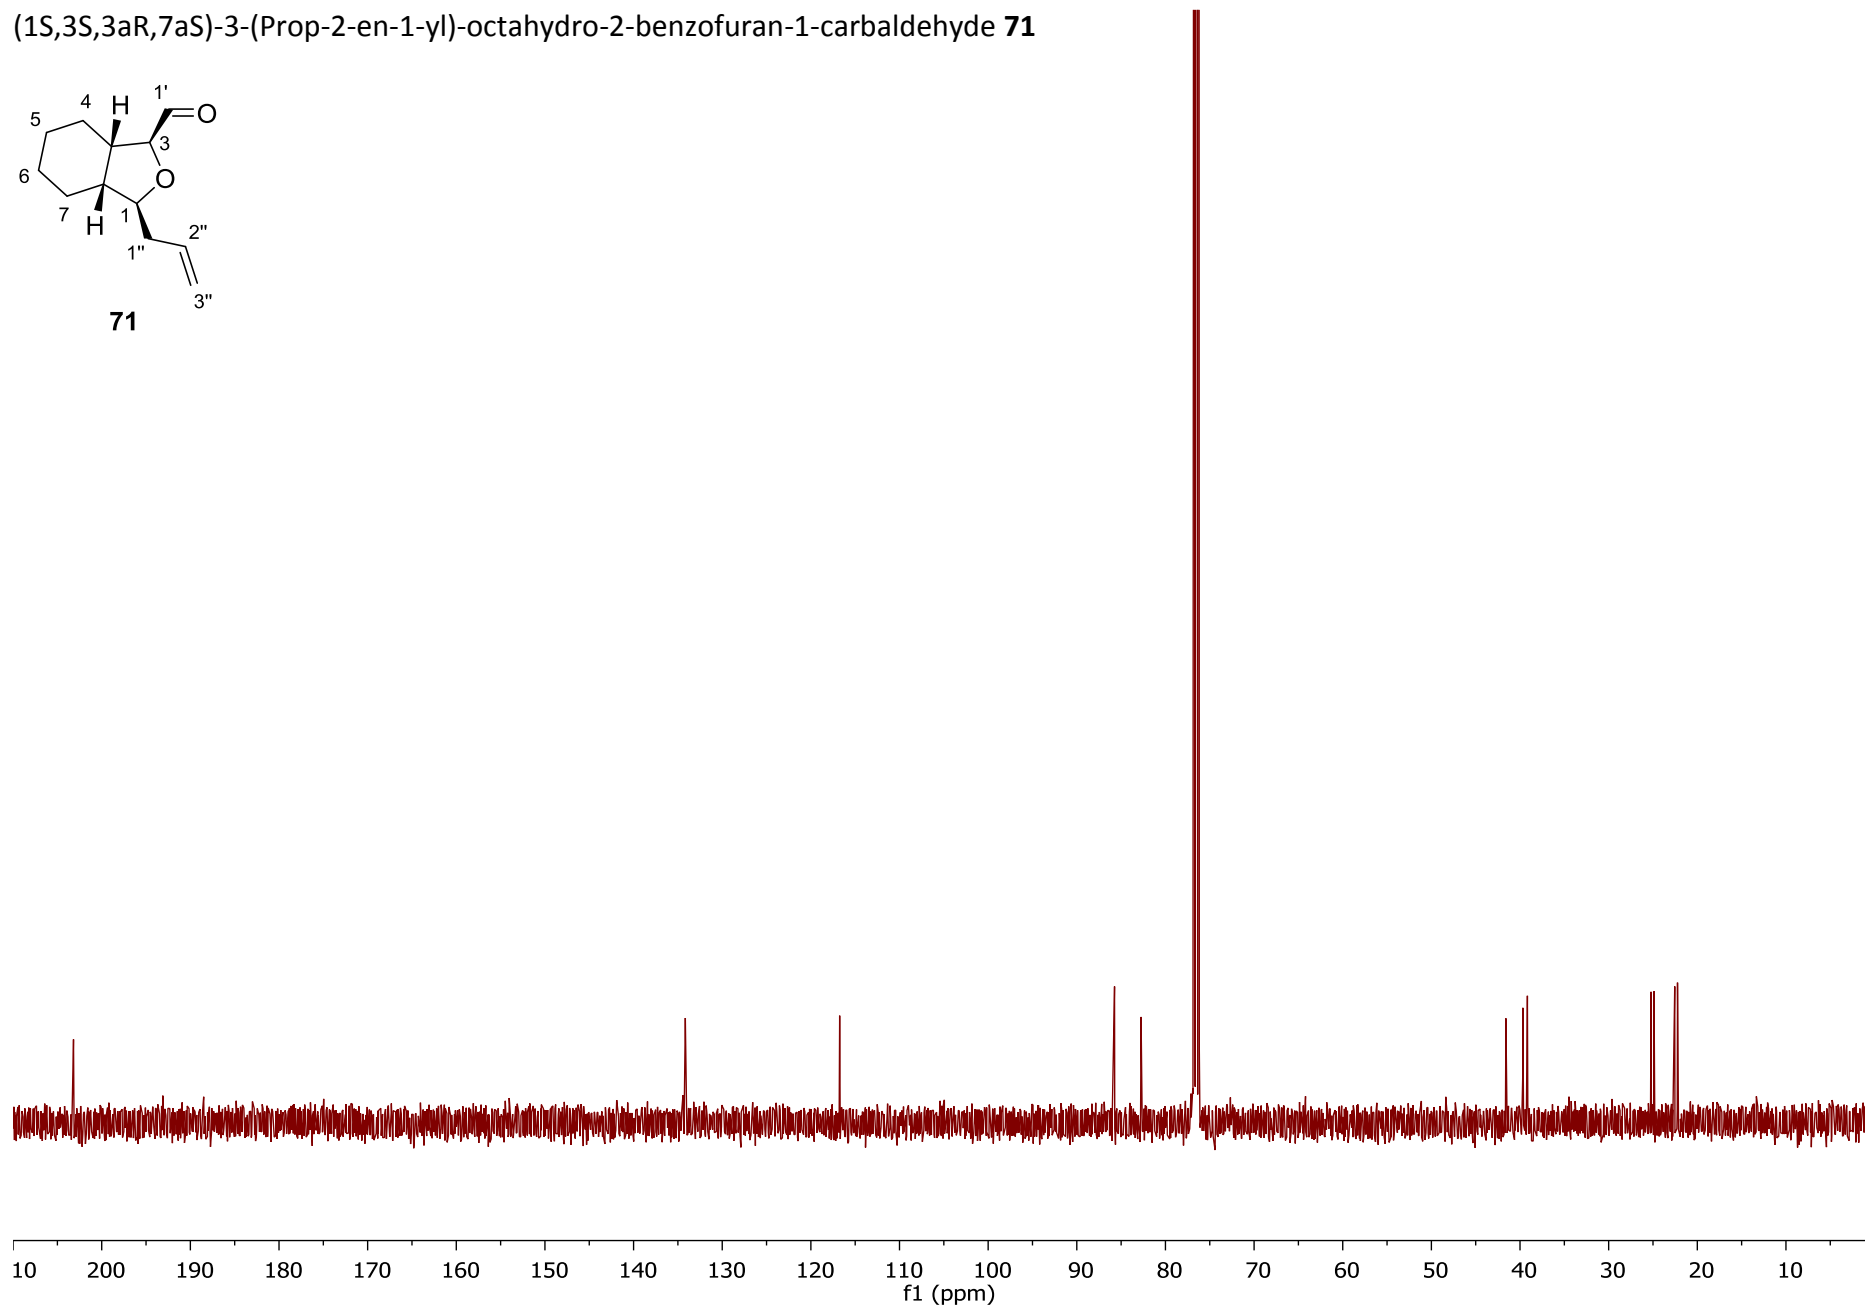

(R)-1-((1S,3S,3aR,7aS)-3-allyl-1-methyloctahydroisobenzofuran-1-yl)pent-4-en-1-ol **72**

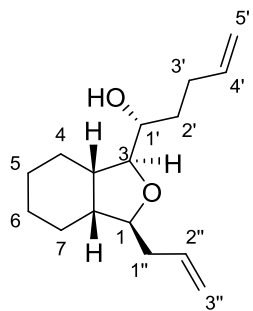

**72**

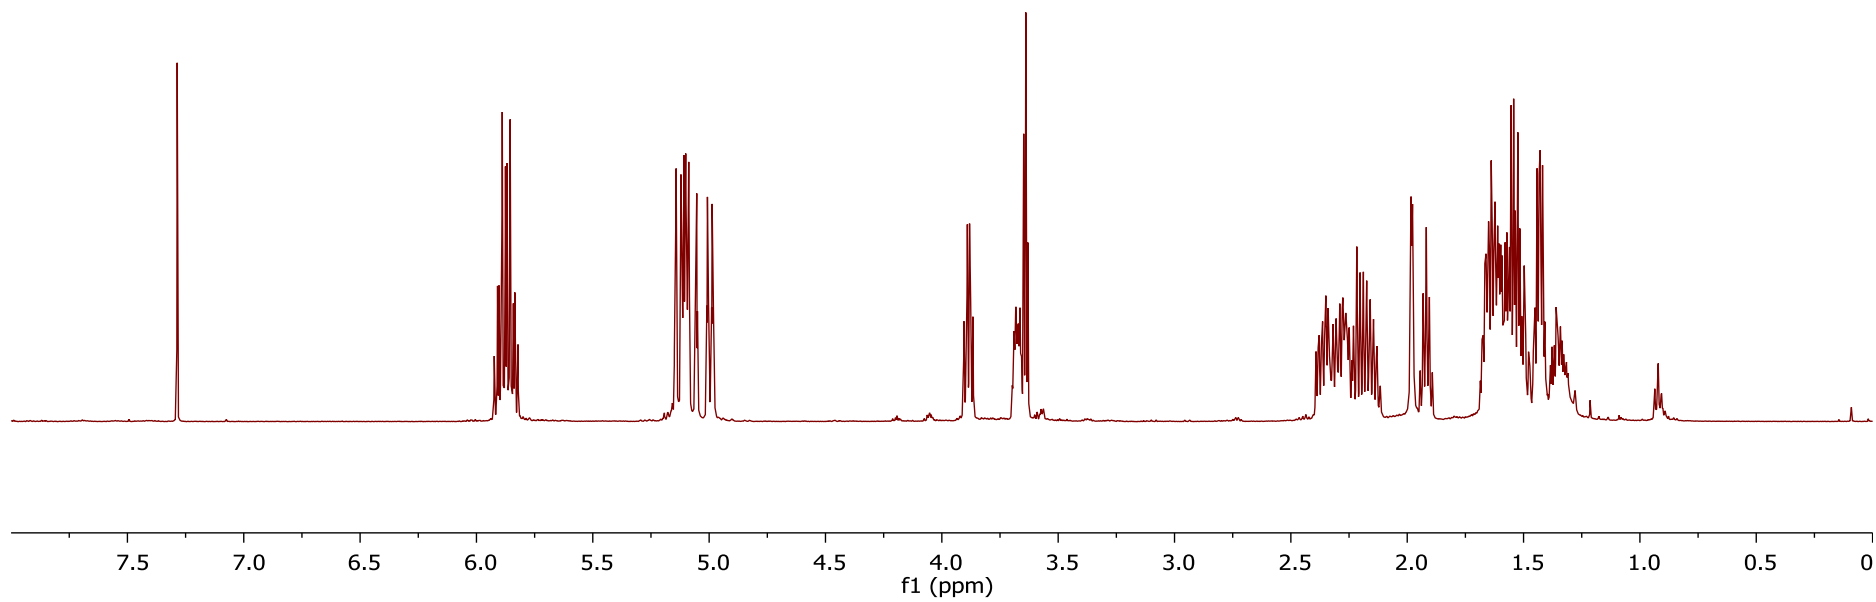

(R)-1-((1S,3S,3aR,7aS)-3-allyl-1-methyloctahydroisobenzofuran-1-yl)pent-4-en-1-ol **72**

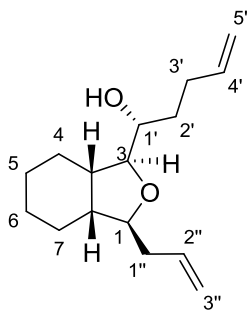

**72**

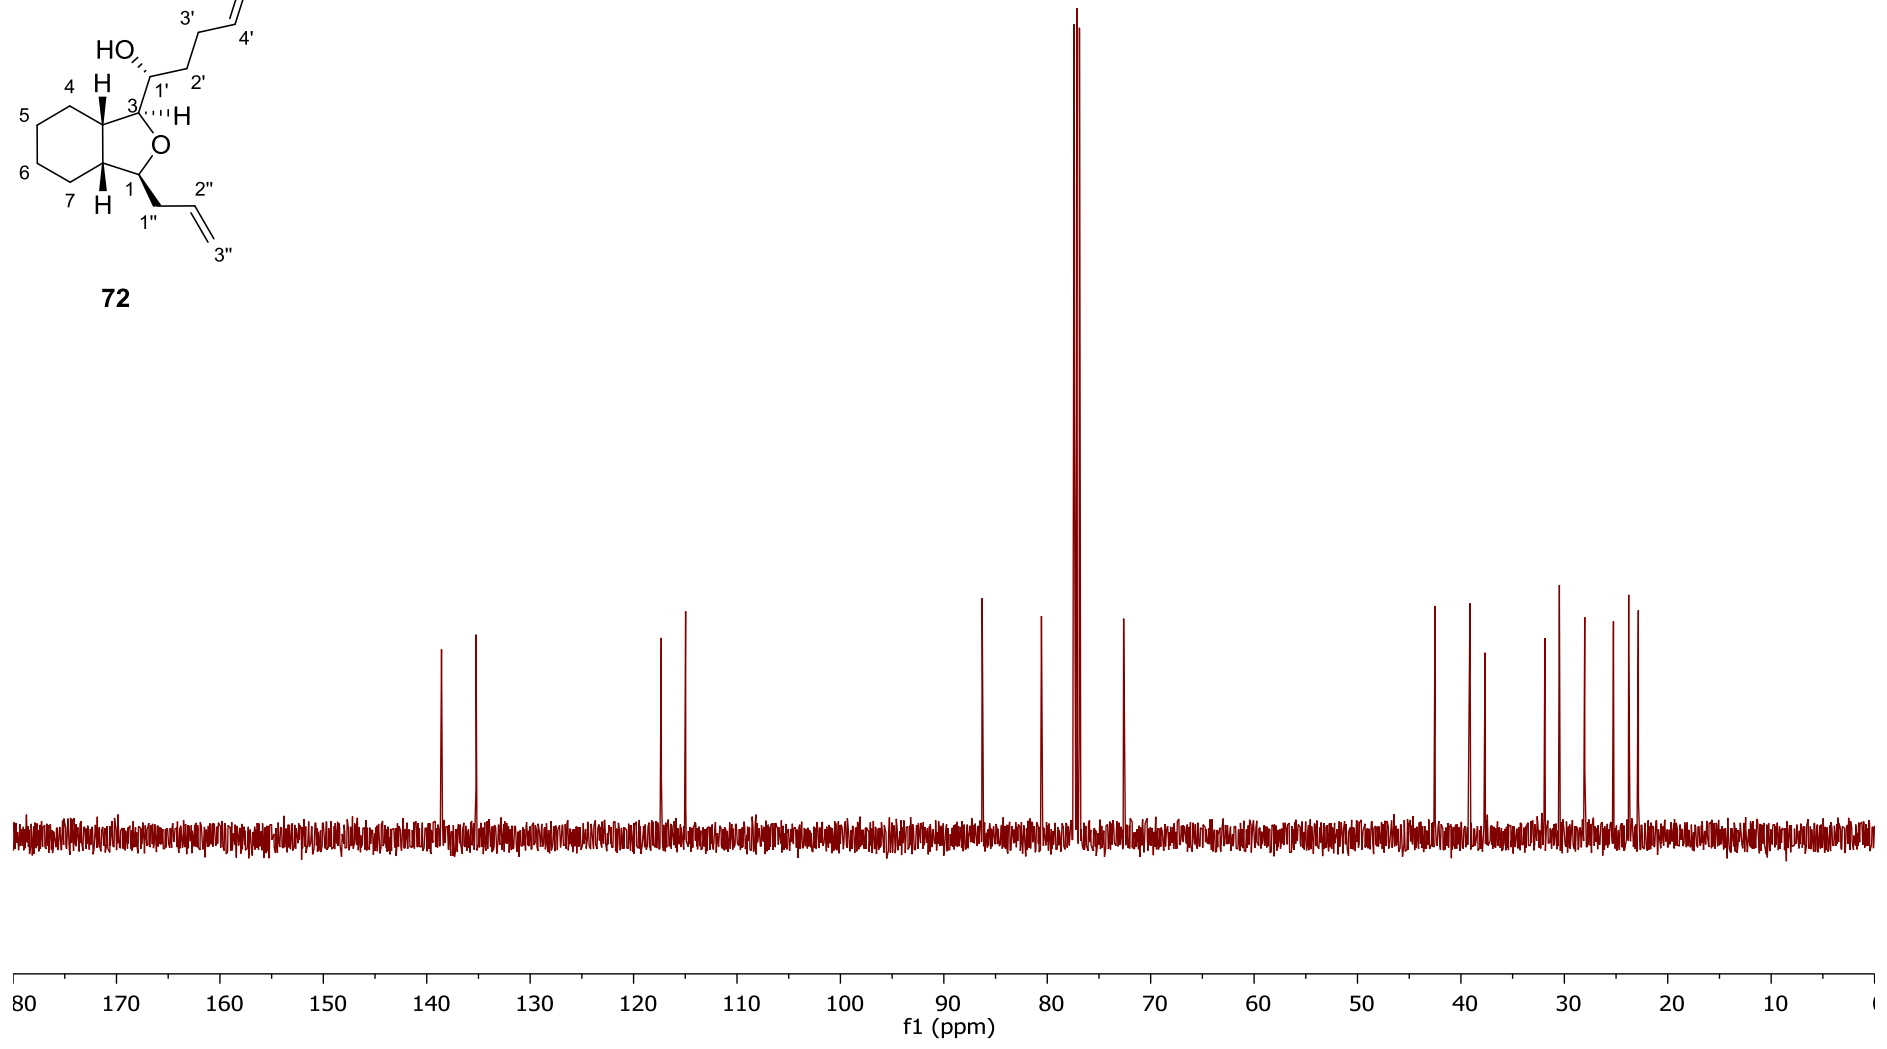

(S)-1-((1S,3S,3aR,7aS)-3-allyl-1-methyloctahydroisobenzofuran-1-yl)pent-4-en-1-ol **73**

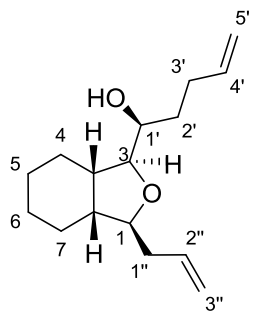

**73**

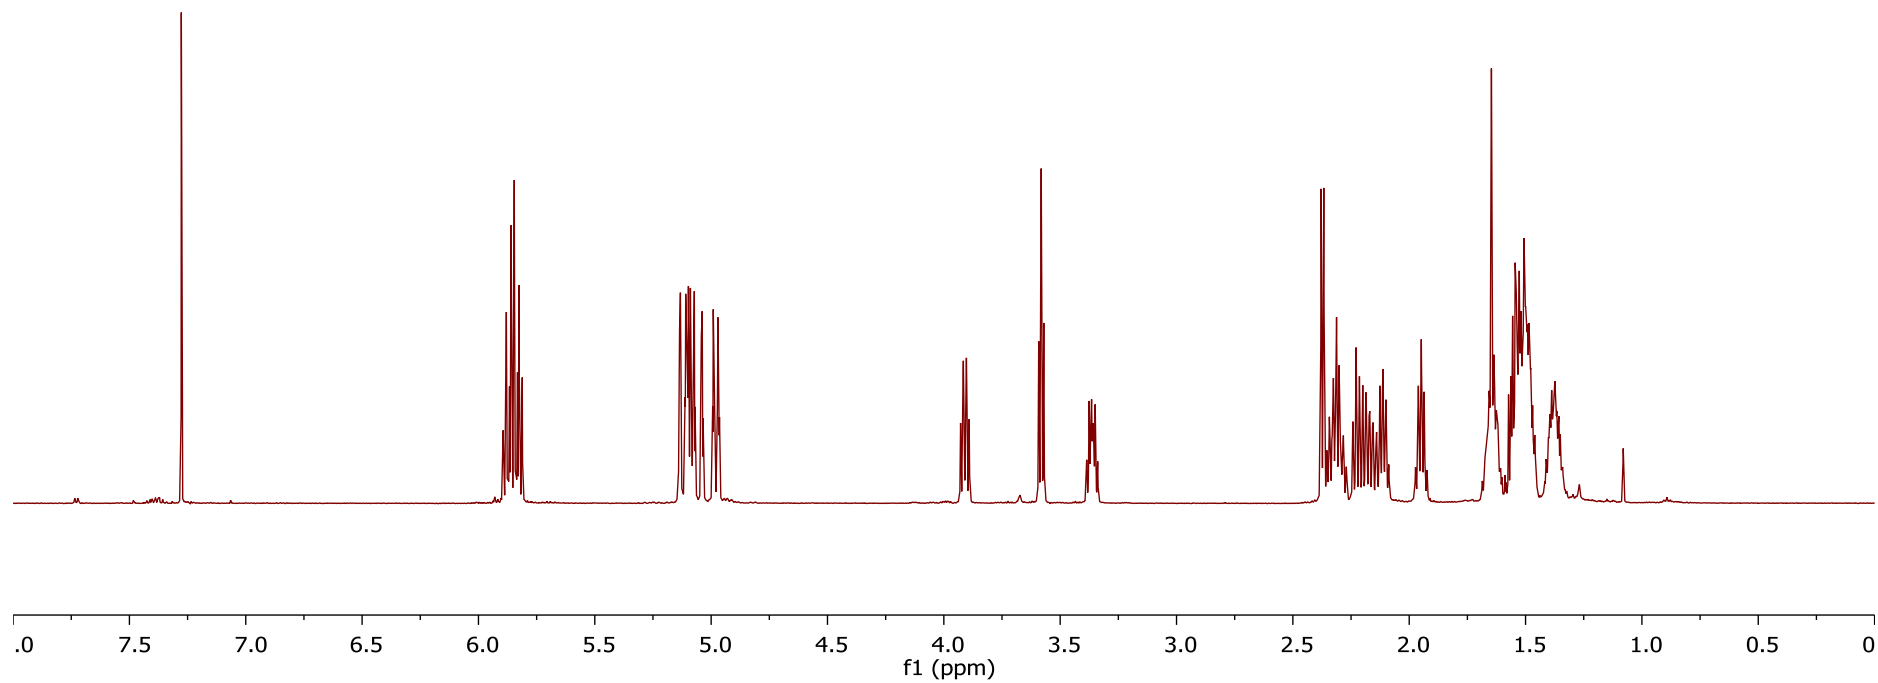

(S)-1-((1S,3S,3aR,7aS)-3-allyl-1-methyloctahydroisobenzofuran-1-yl)pent-4-en-1-ol **73**



**73**

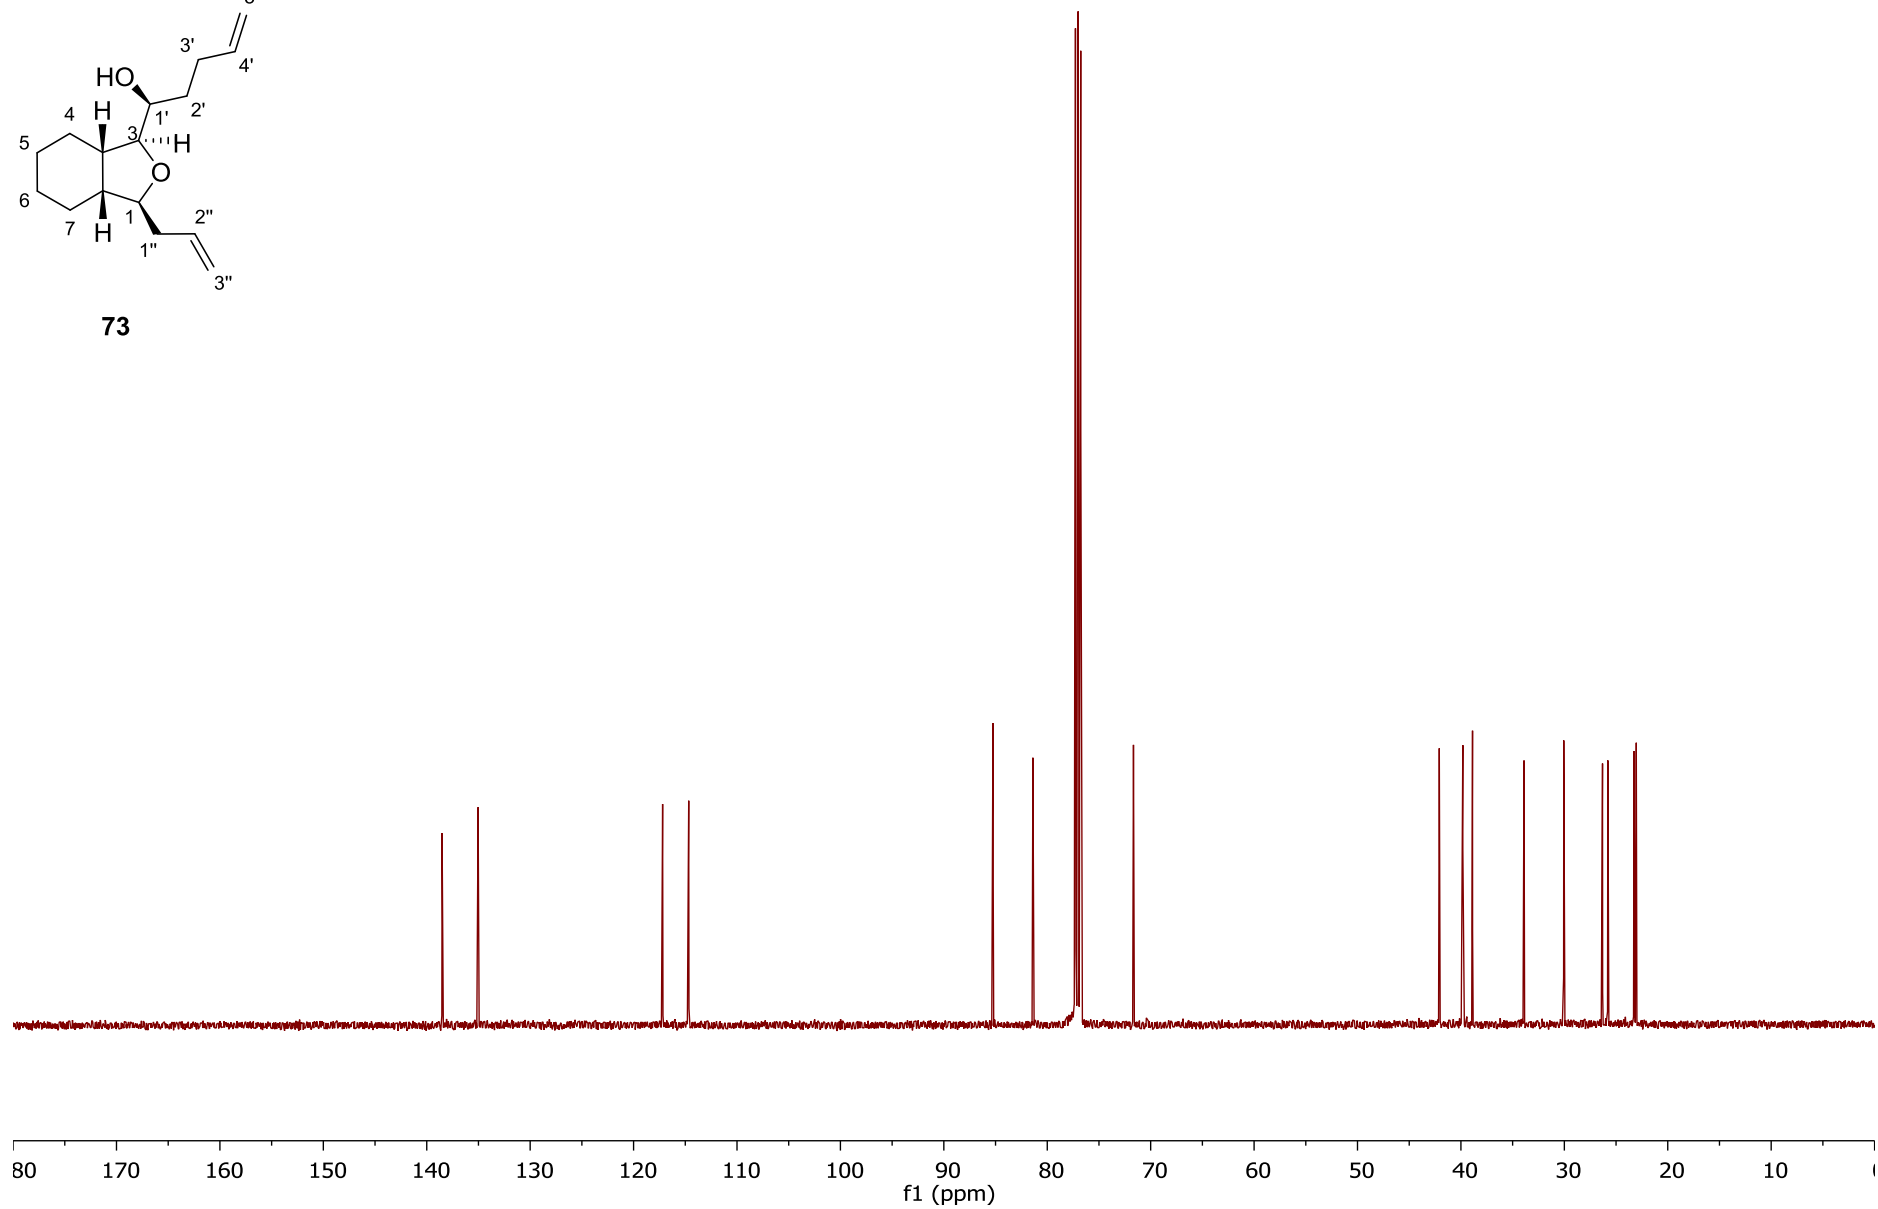

(((R)-1-((1S,3S,3aR,7aS)-3-allyl-1-methyloctahydroisobenzofuran-1-yl)pent-4-en-1-yl)oxy)(tert-butyl)dimethylsilane **74**

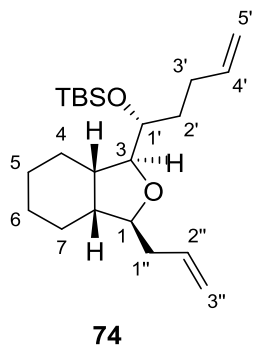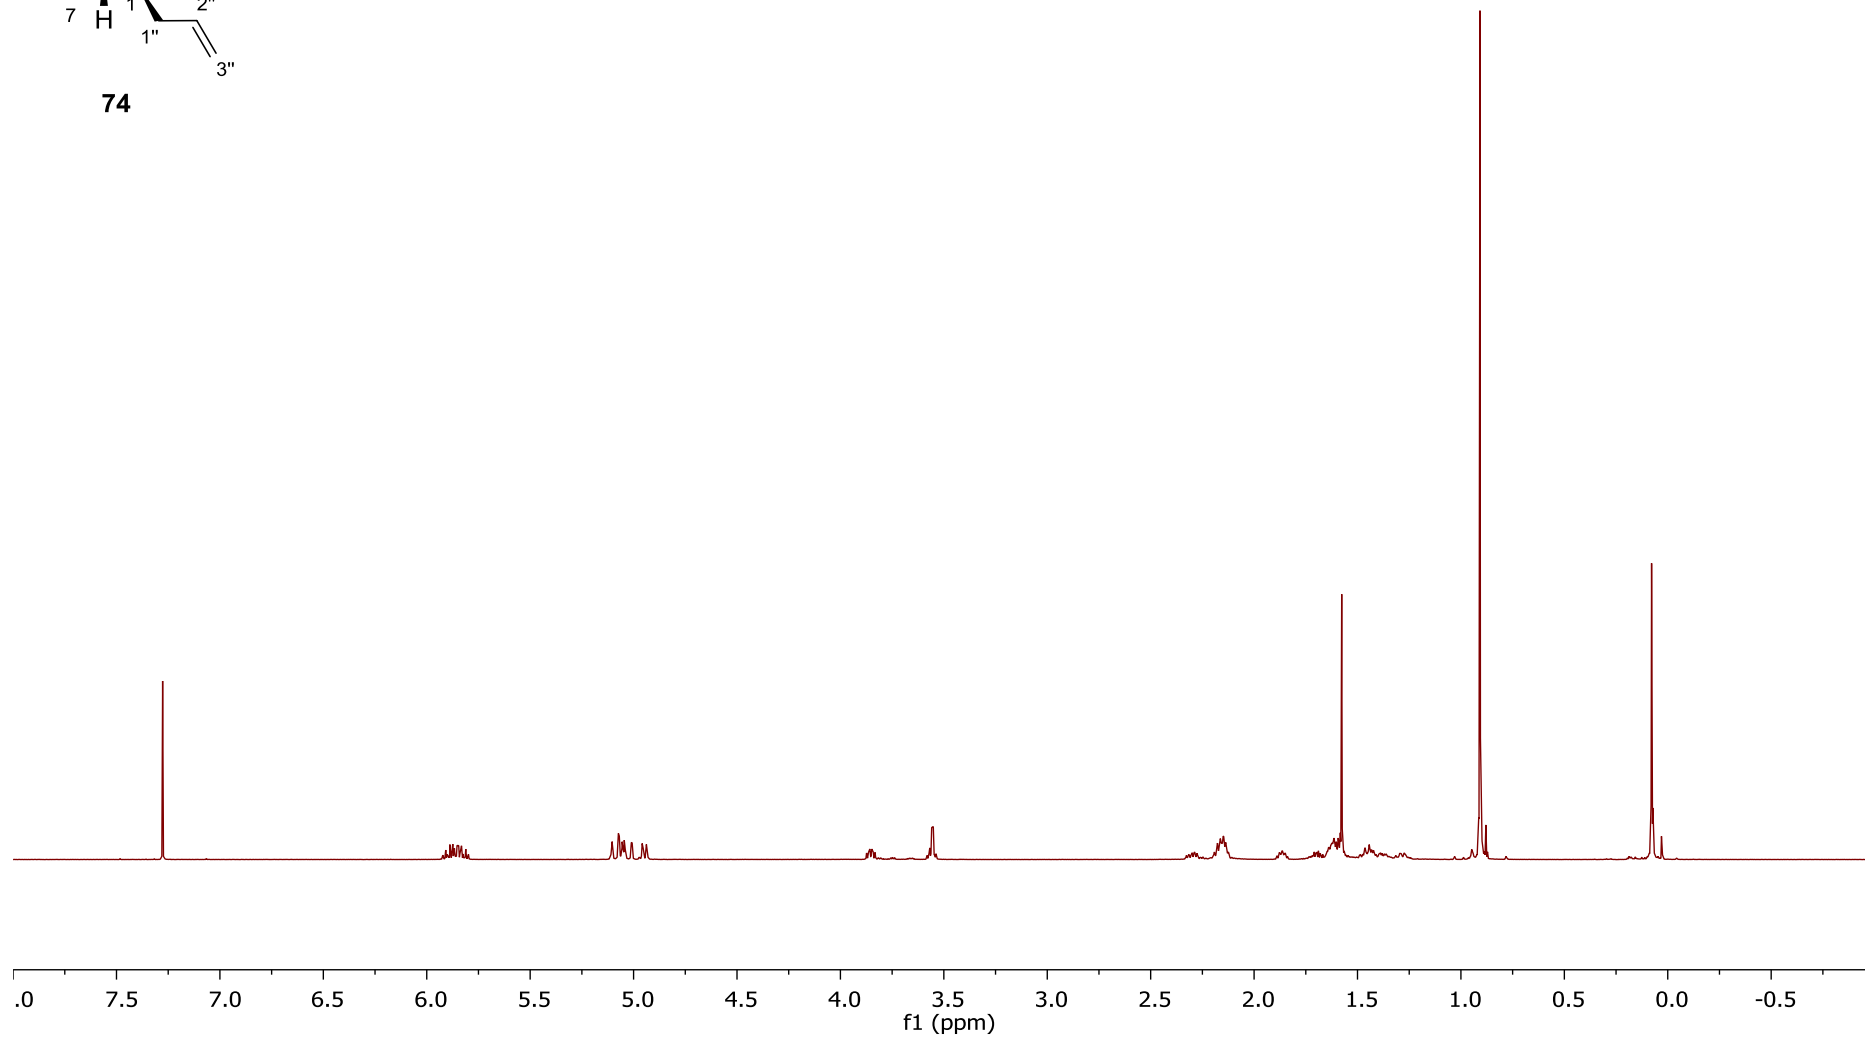

(((R)-1-((1S,3S,3aR,7aS)-3-allyl-1-methyloctahydroisobenzofuran-1-yl)oxy)(tert-butyl)dimethylsilane **74**

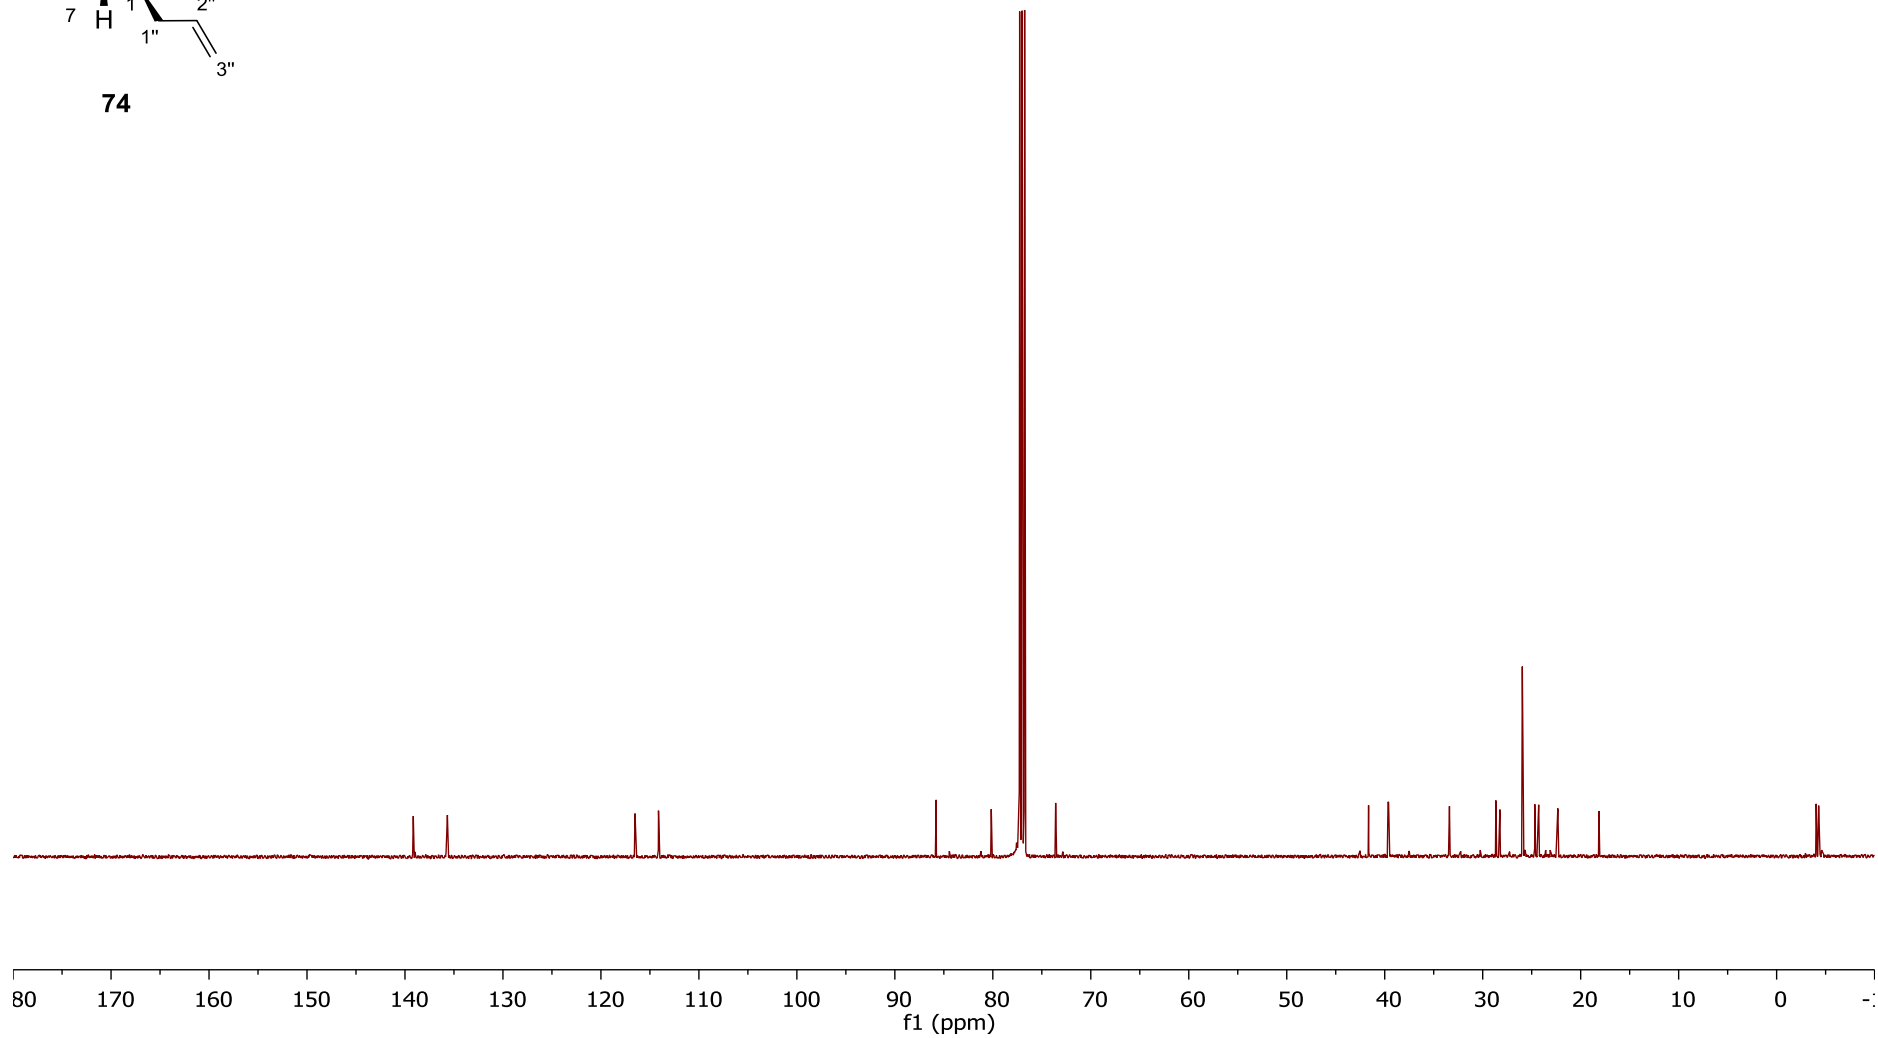

tert-butyl(((4a*S*,5*S*,6*R*,12*S*,12a*R*,*Z*)-1,2,3,4,4a,5,6,7,8,11,12,12a-dodecahydro-5,12-epoxybenzo[10]annulen-6-yl)oxy)dimethylsilane **75**

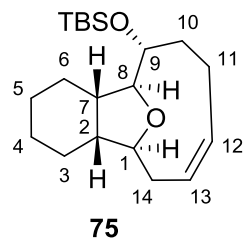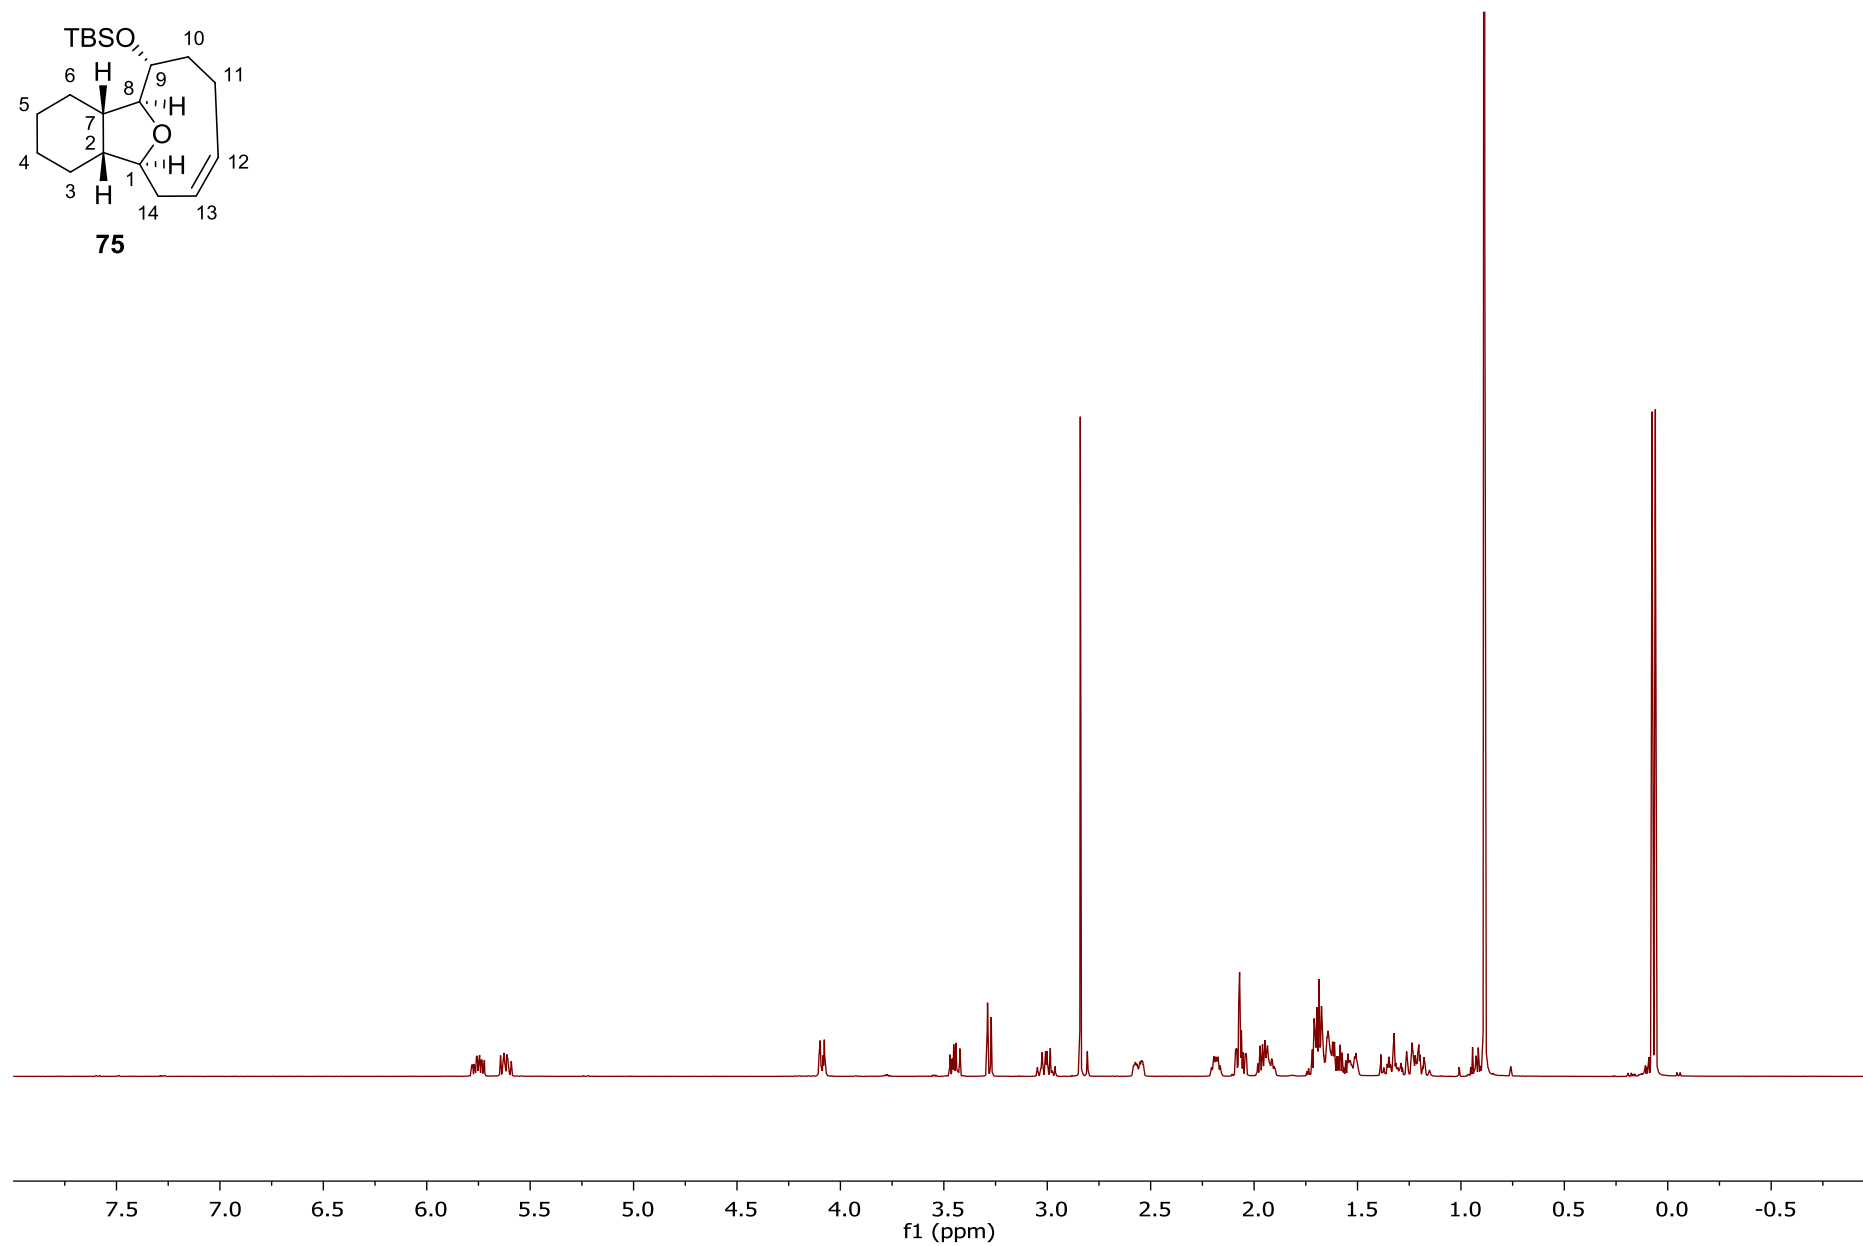



tert-butyl(((4a*S*,5*S*,6*R*,12*S*,12a*R*,*Z*)-1,2,3,4,4a,5,6,7,8,11,12,12a-dodecahydro-5,12-epoxybenzo[10]annulen-6-yl)oxy)dimethylsilane **75**

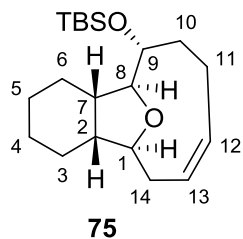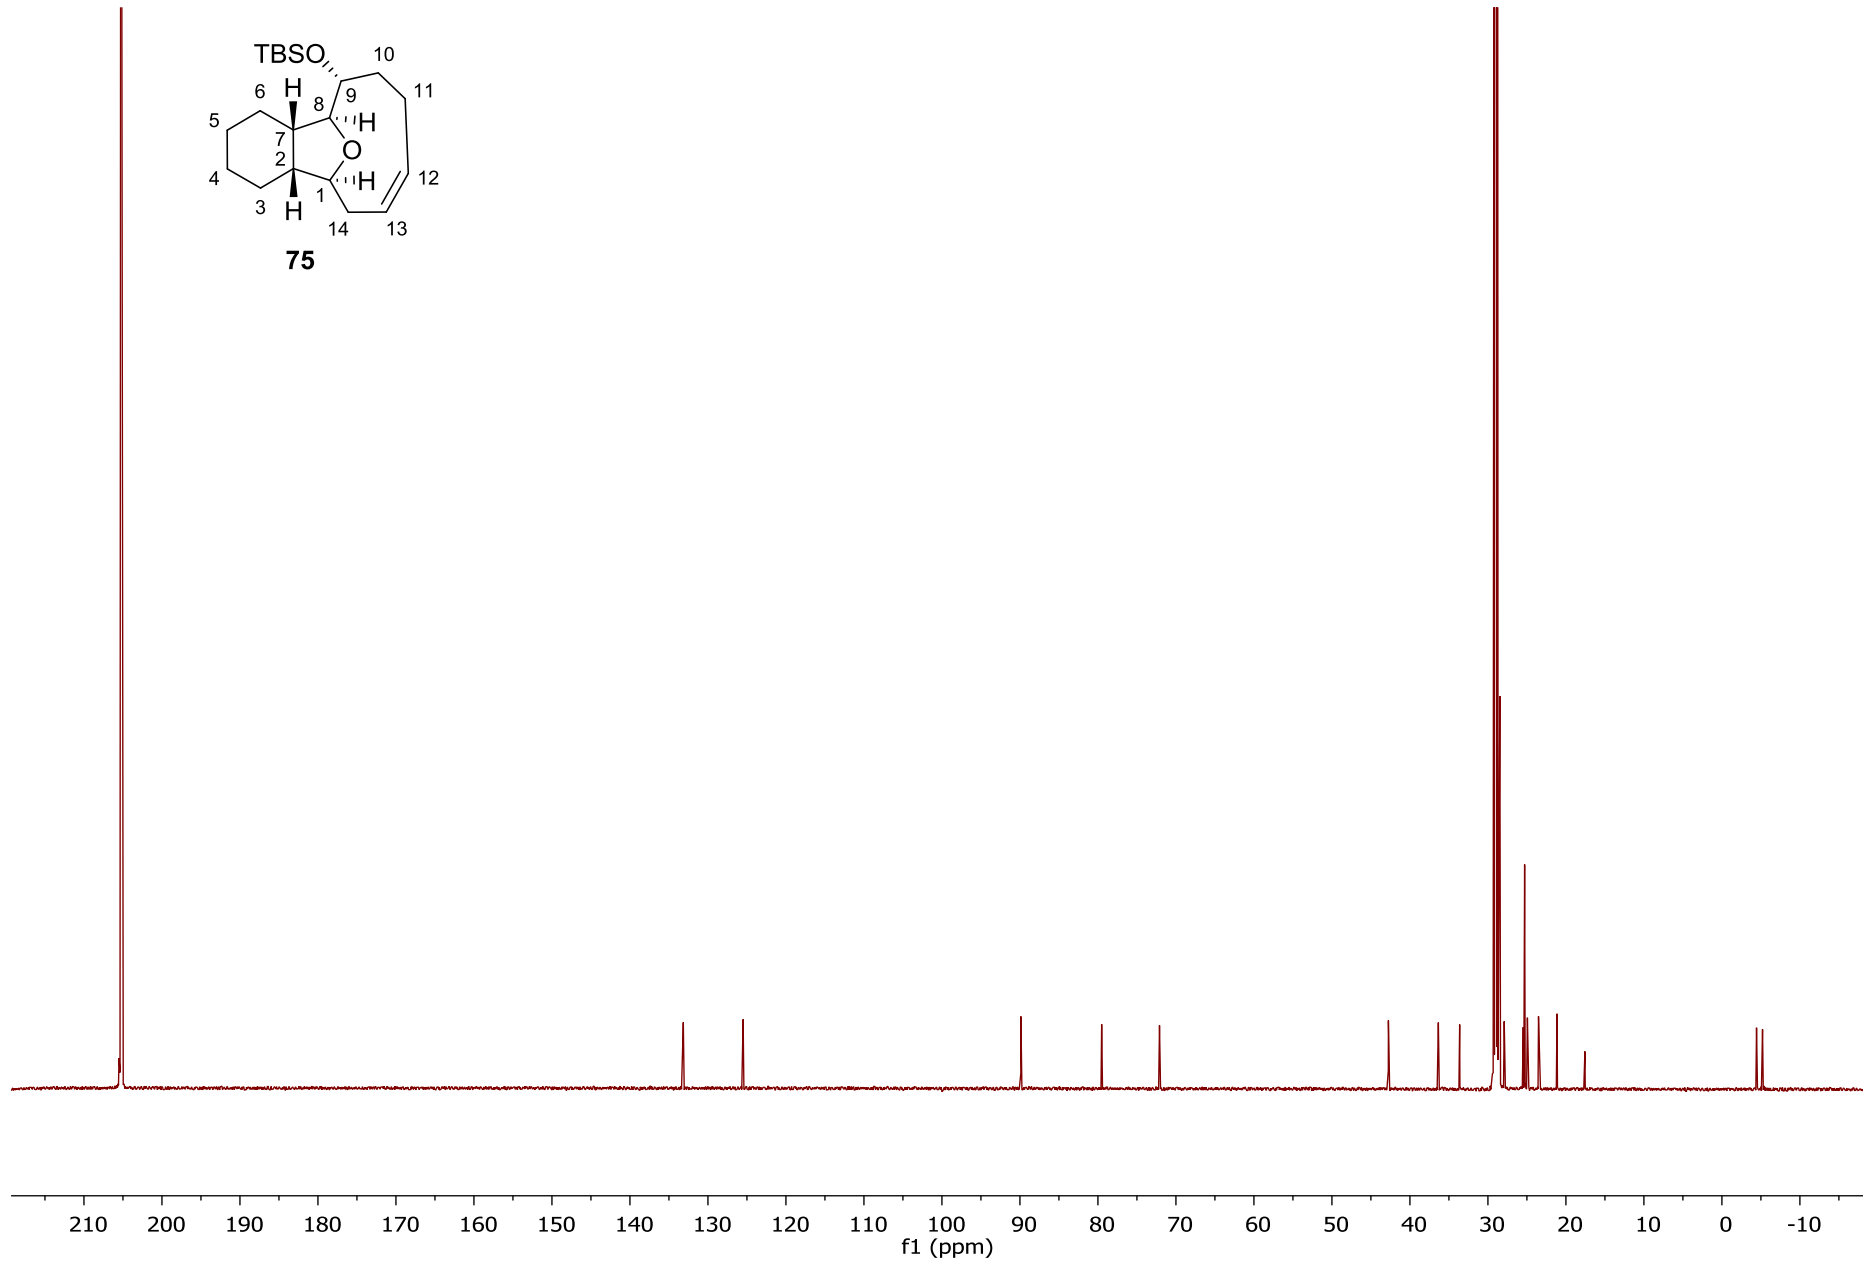

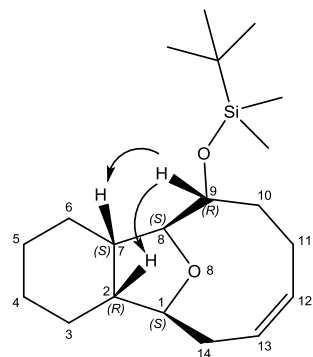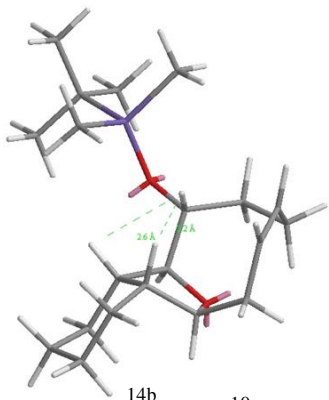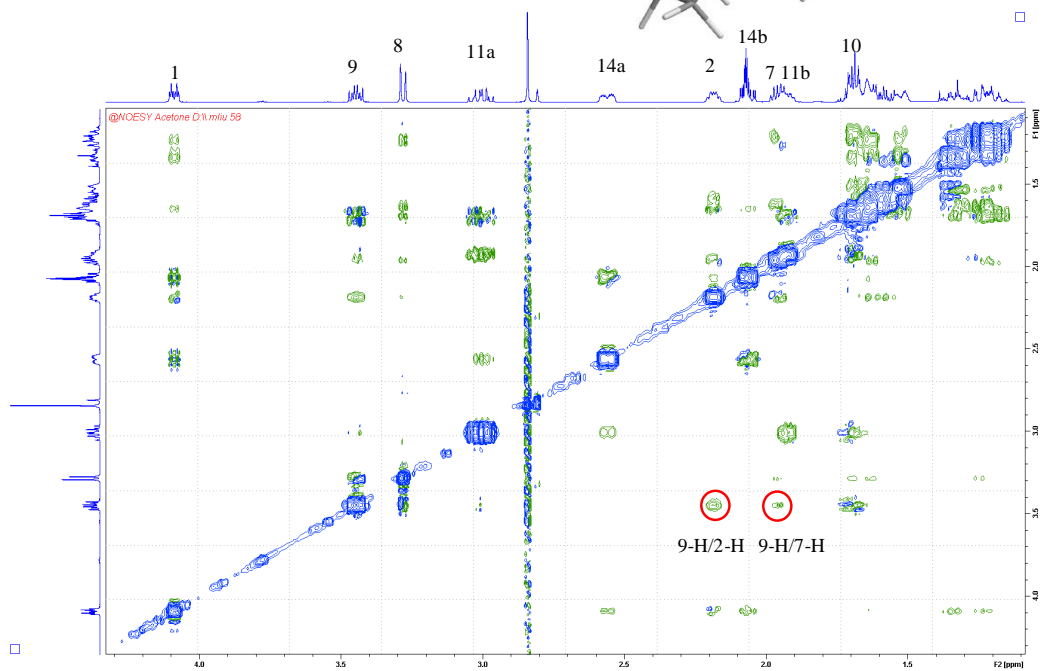

The  $^1\text{H}$ - $^1\text{H}$  NOESY spectrum for **75**

(4a*S*,5*S*,6*R*,12*S*,12a*R*,*Z*)-5,12-dimethyl-1,2,3,4,4a,5,6,7,8,11,12,12a-dodecahydro-5,12-epoxybenzo[10]annulen-6-ol **76**

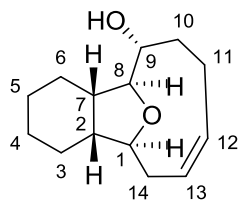

**76**

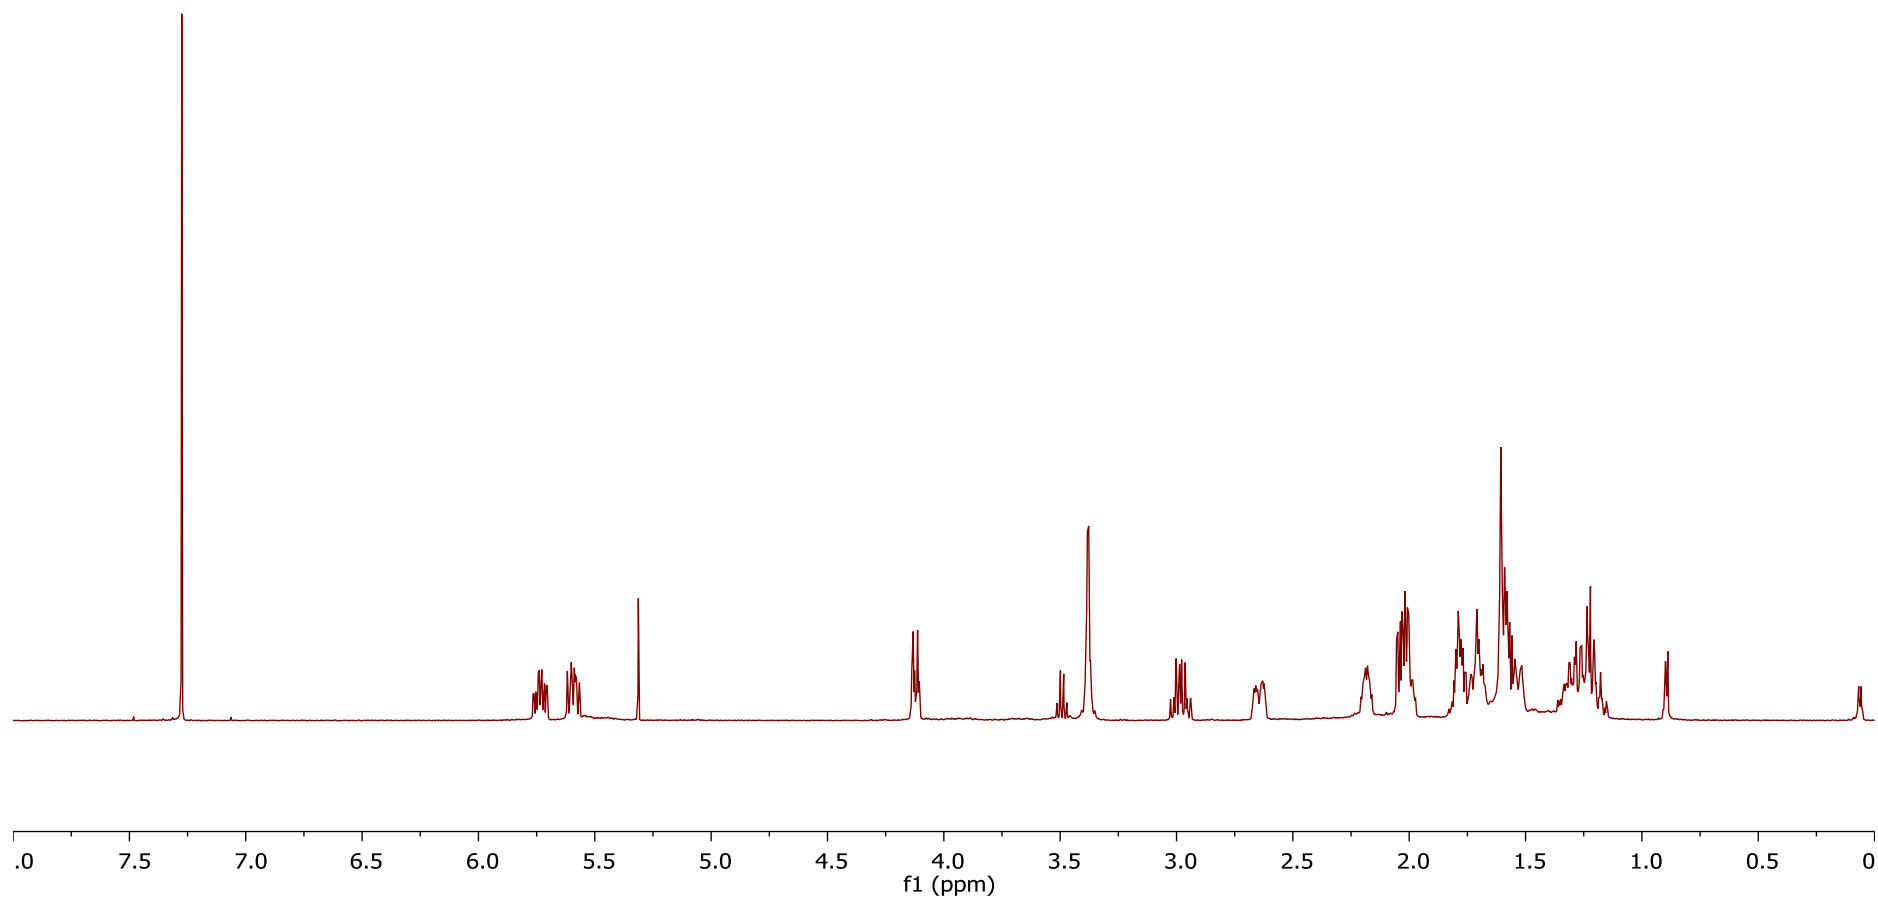

(4a*S*,5*S*,6*R*,12*S*,12a*R*,*Z*)-5,12-dimethyl-1,2,3,4,4a,5,6,7,8,11,12,12a-dodecahydro-5,12-epoxybenzo[10]annulen-6-ol **76**

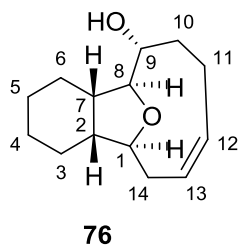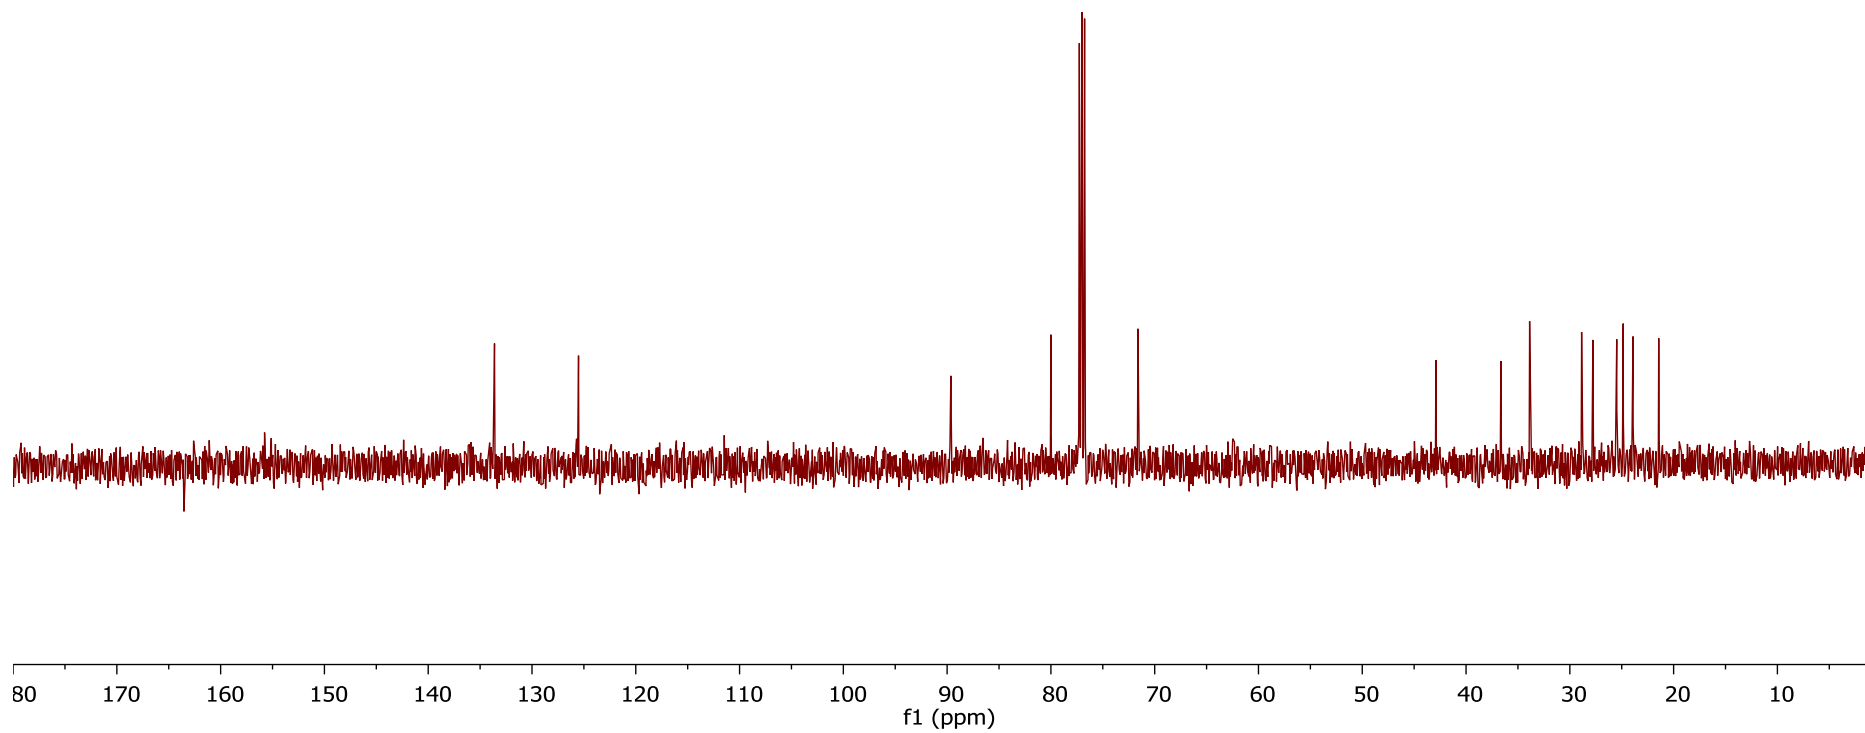

(3*S*,3*aS*,4*R*,7*S*,7*aR*)-3-(((*tert*-butyldiphenylsilyl)oxy)methyl)-1,3,3*a*,4,7,7*a*-hexahydro-4,7-methanoisobenzofuran-1-ol **79a**

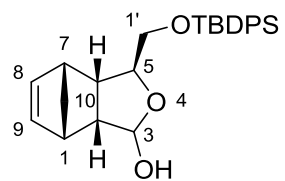

**79a**

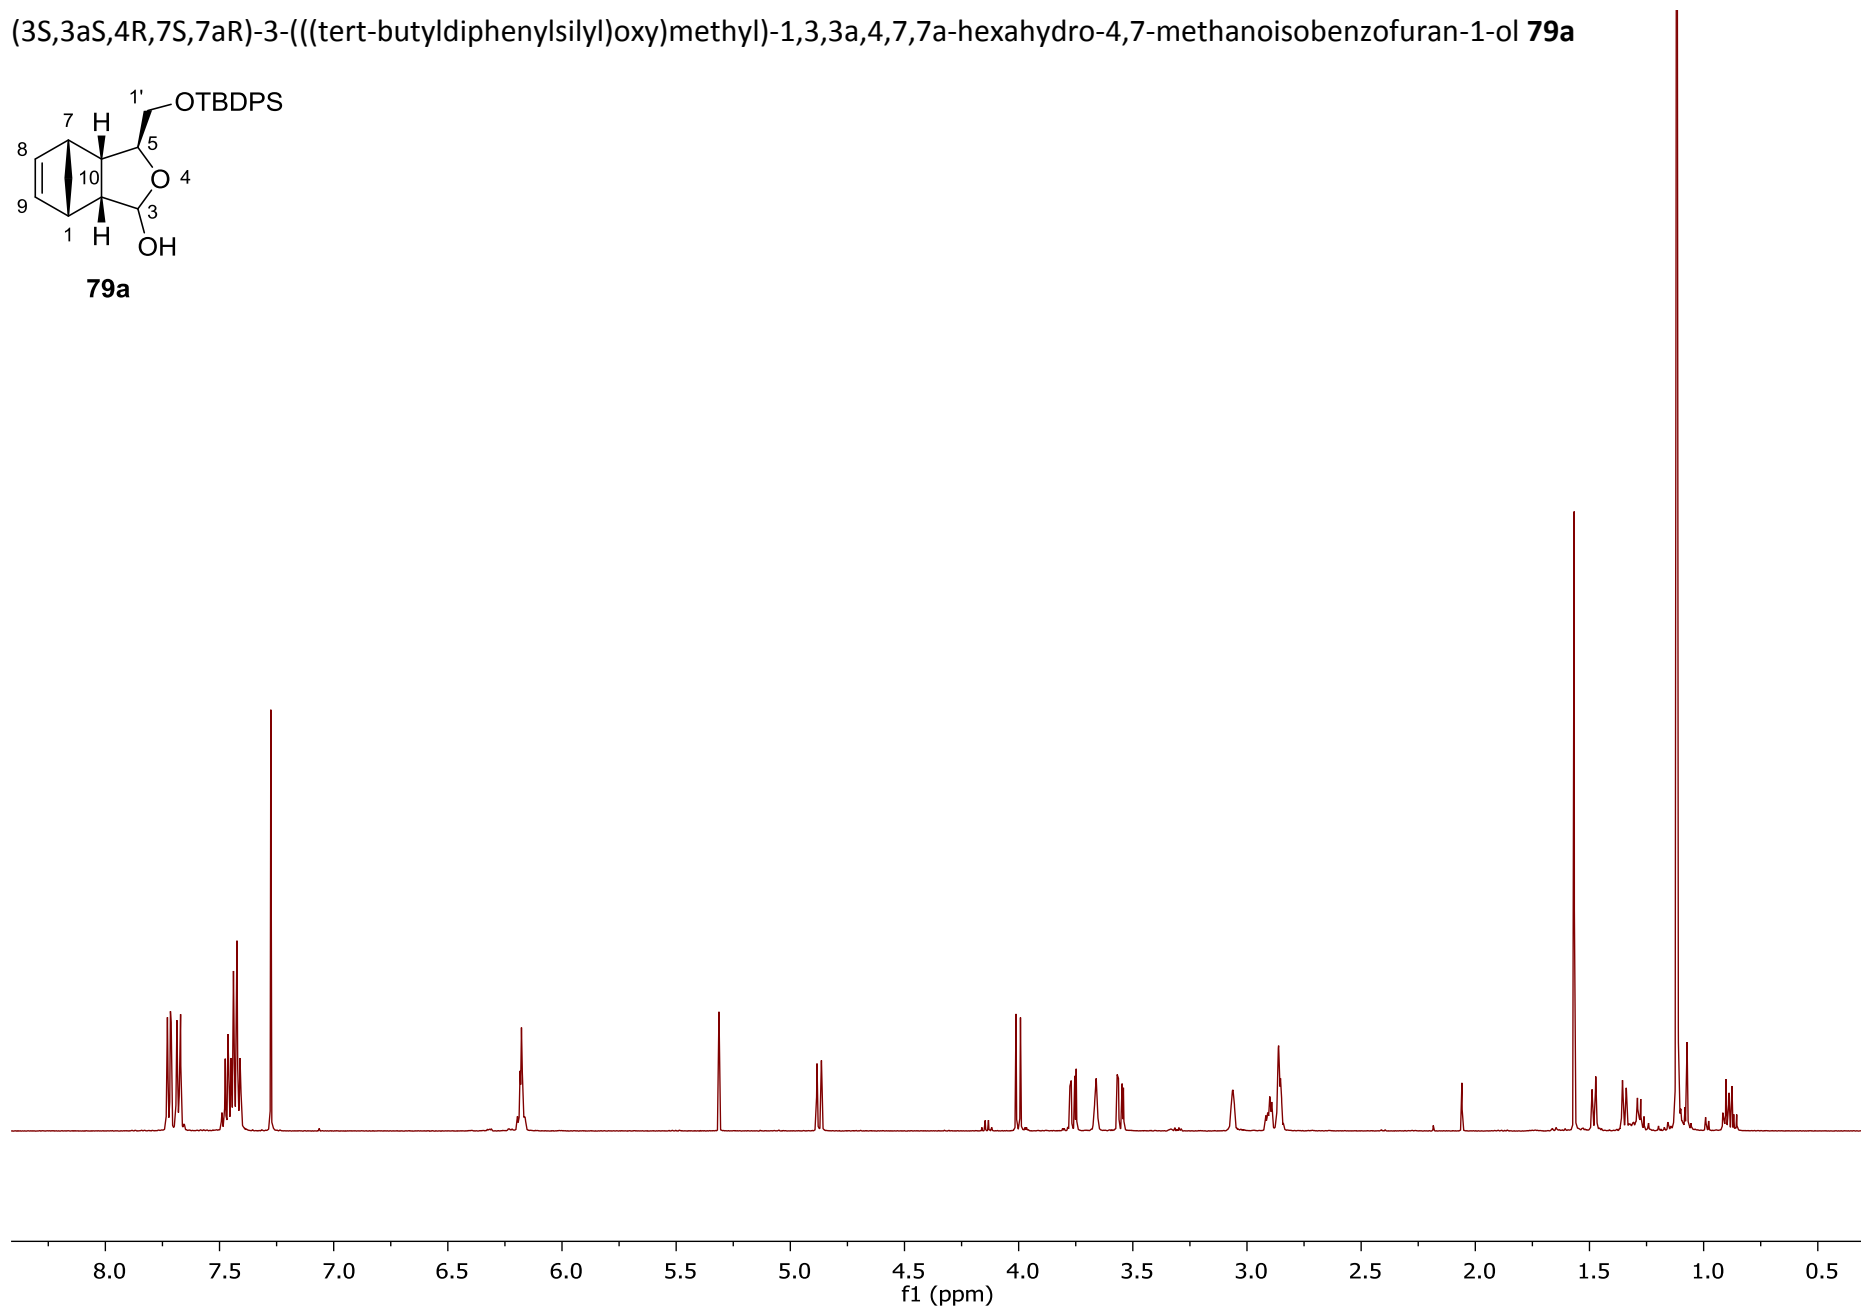

(3*S*,3*aS*,4*R*,7*S*,7*aR*)-3-(((*tert*-butyldiphenylsilyl)oxy)methyl)-1,3,3*a*,4,7,7*a*-hexahydro-4,7-methanoisobenzofuran-1-ol **79a**

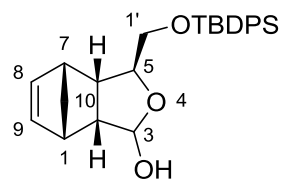

**79a**

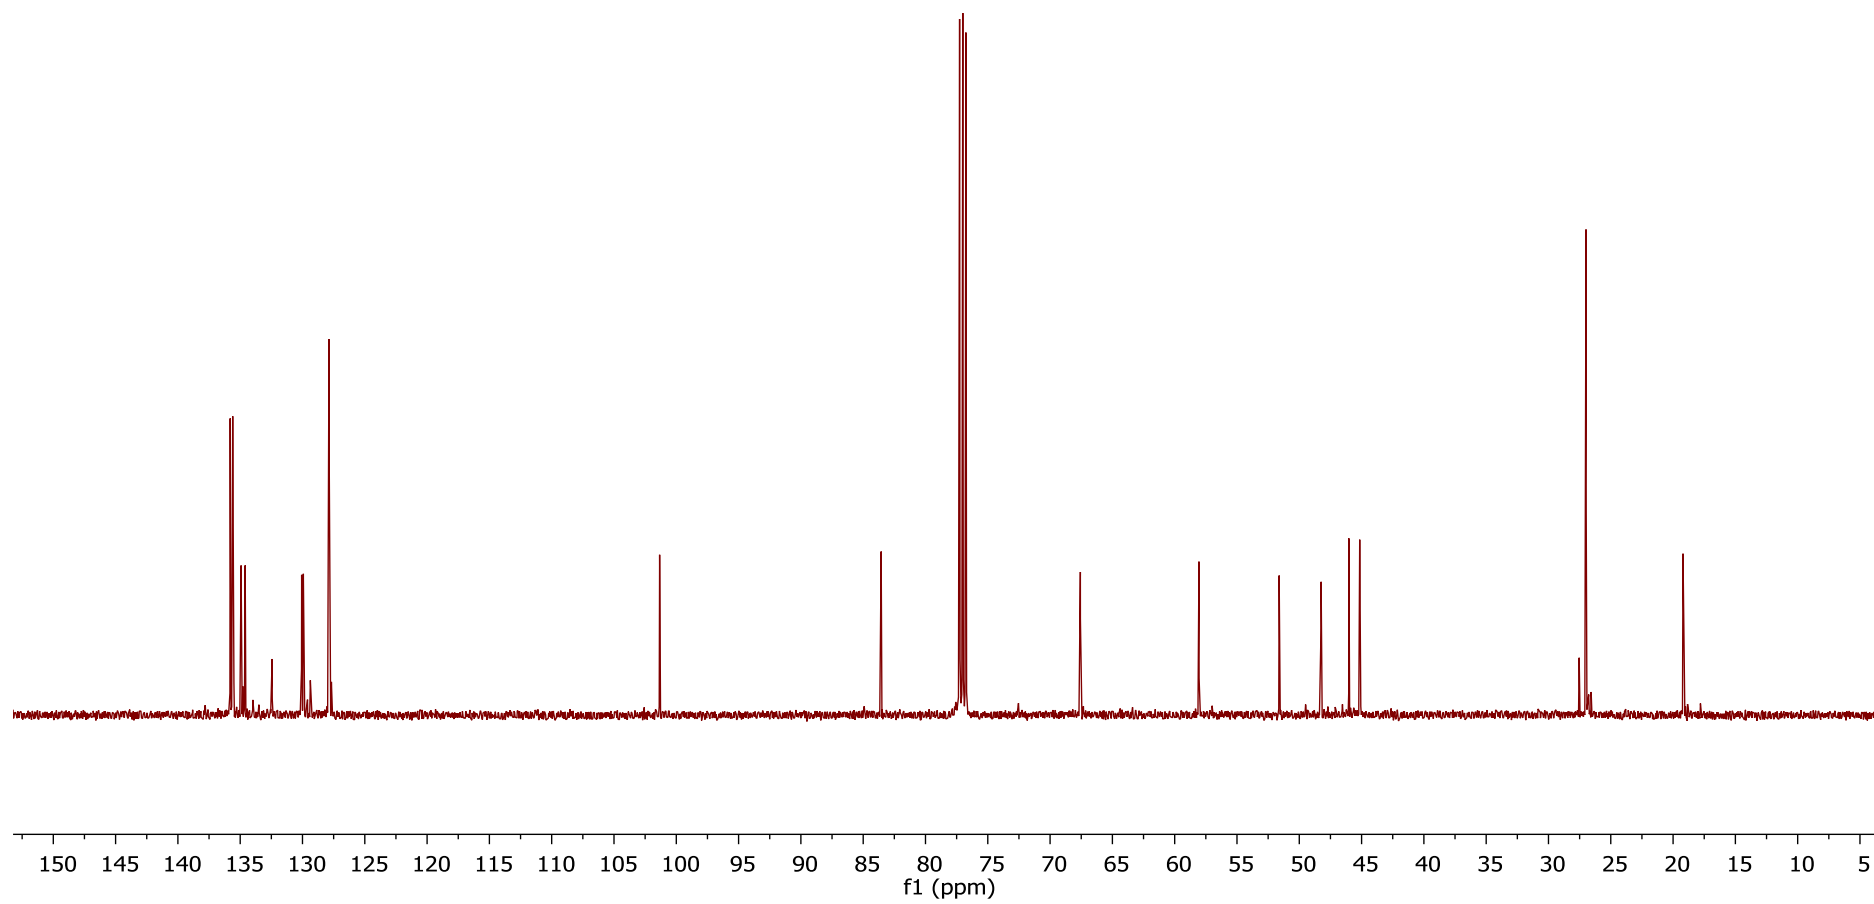

(((1S,3S,3aR,4S,7R,7aS)-3-allyl-1,3,3a,4,7,7a-hexahydro-4,7-methanoisobenzofuran-1-yl)methoxy)(tert-butyl)diphenylsilane **79b**

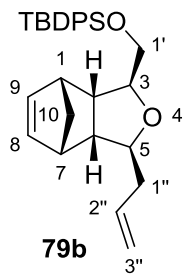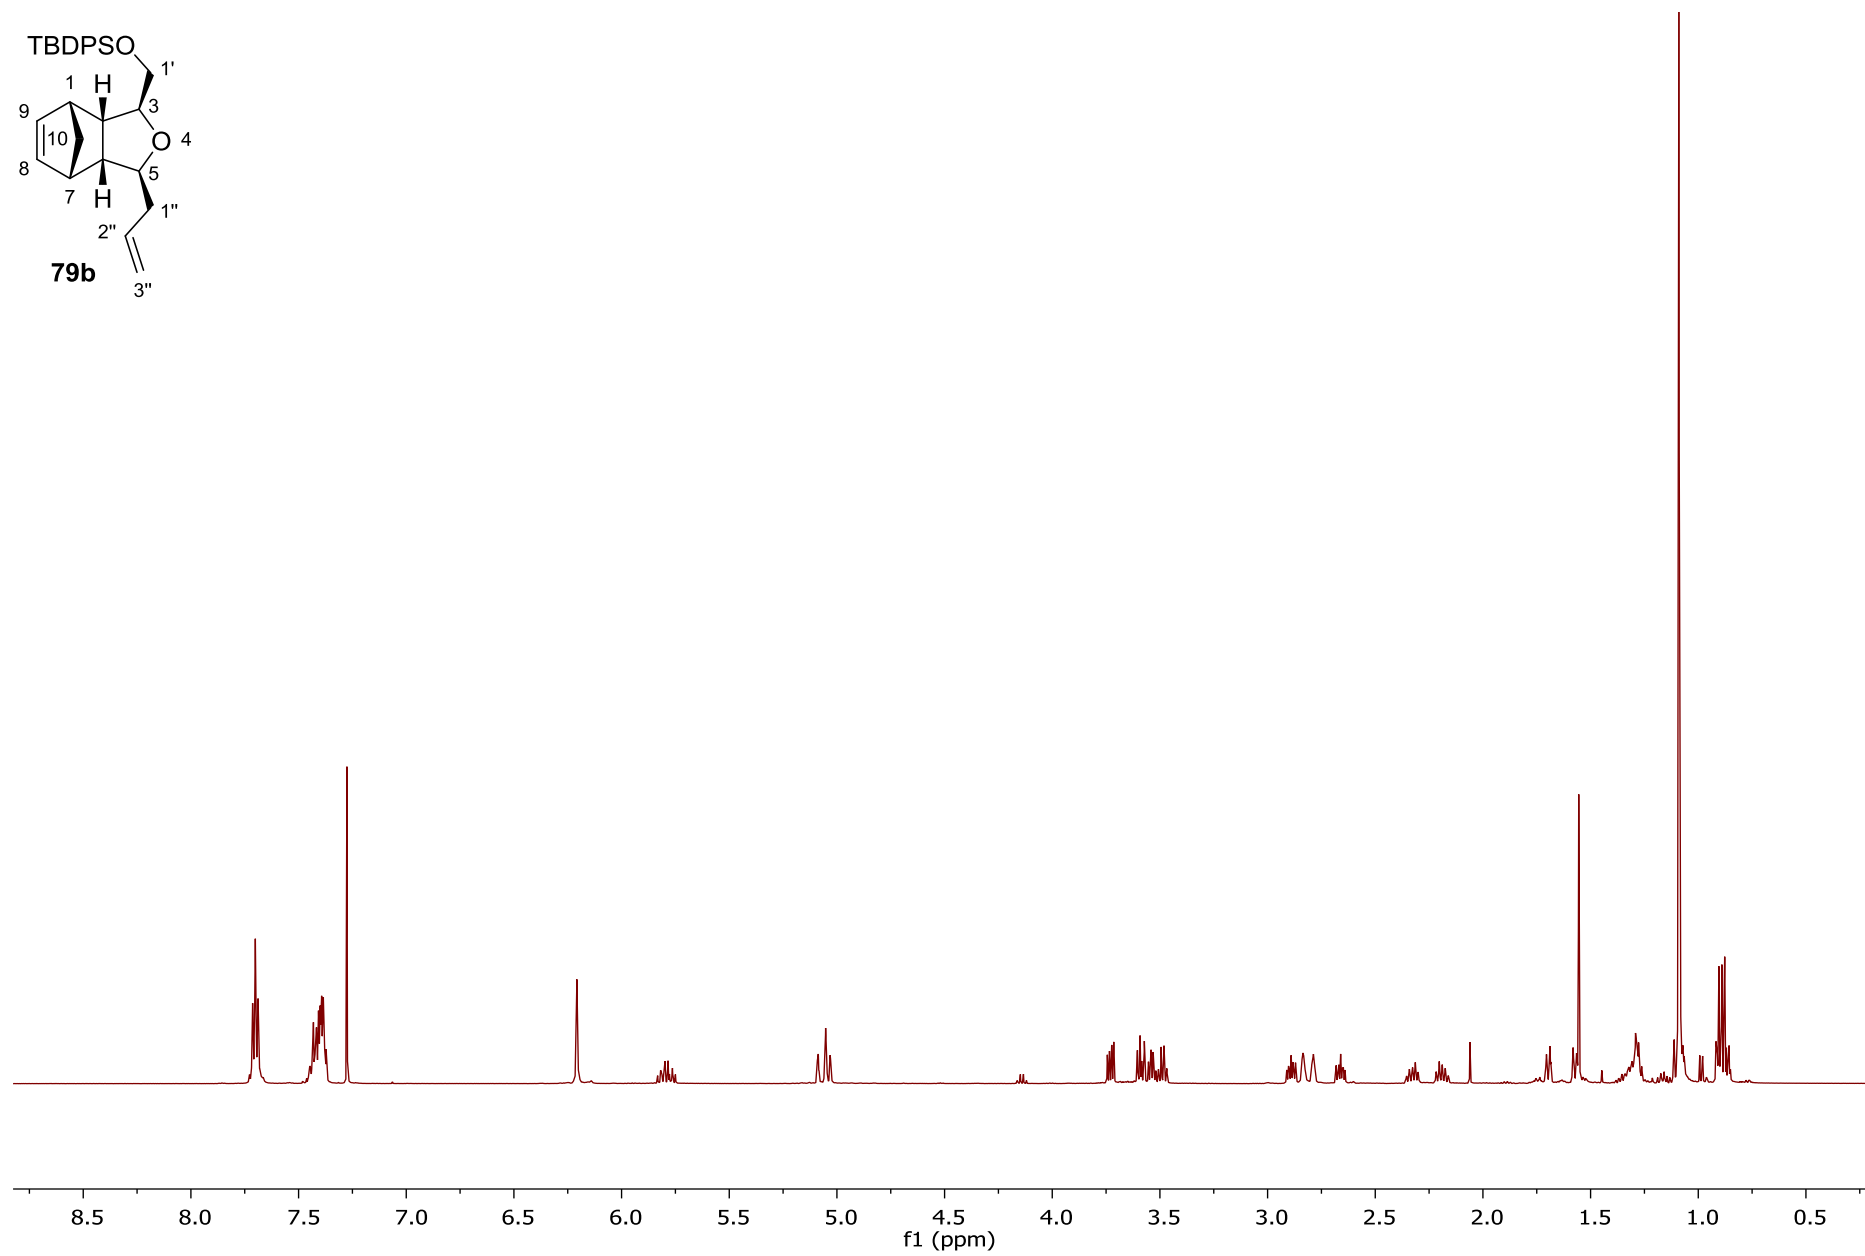

(((1S,3S,3aR,4S,7R,7aS)-3-allyl-1,3,3a,4,7,7a-hexahydro-4,7-methanoisobenzofuran-1-yl)methoxy)(tert-butyl)diphenylsilane **79b**

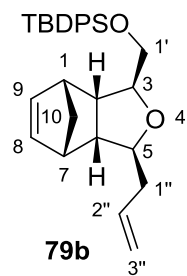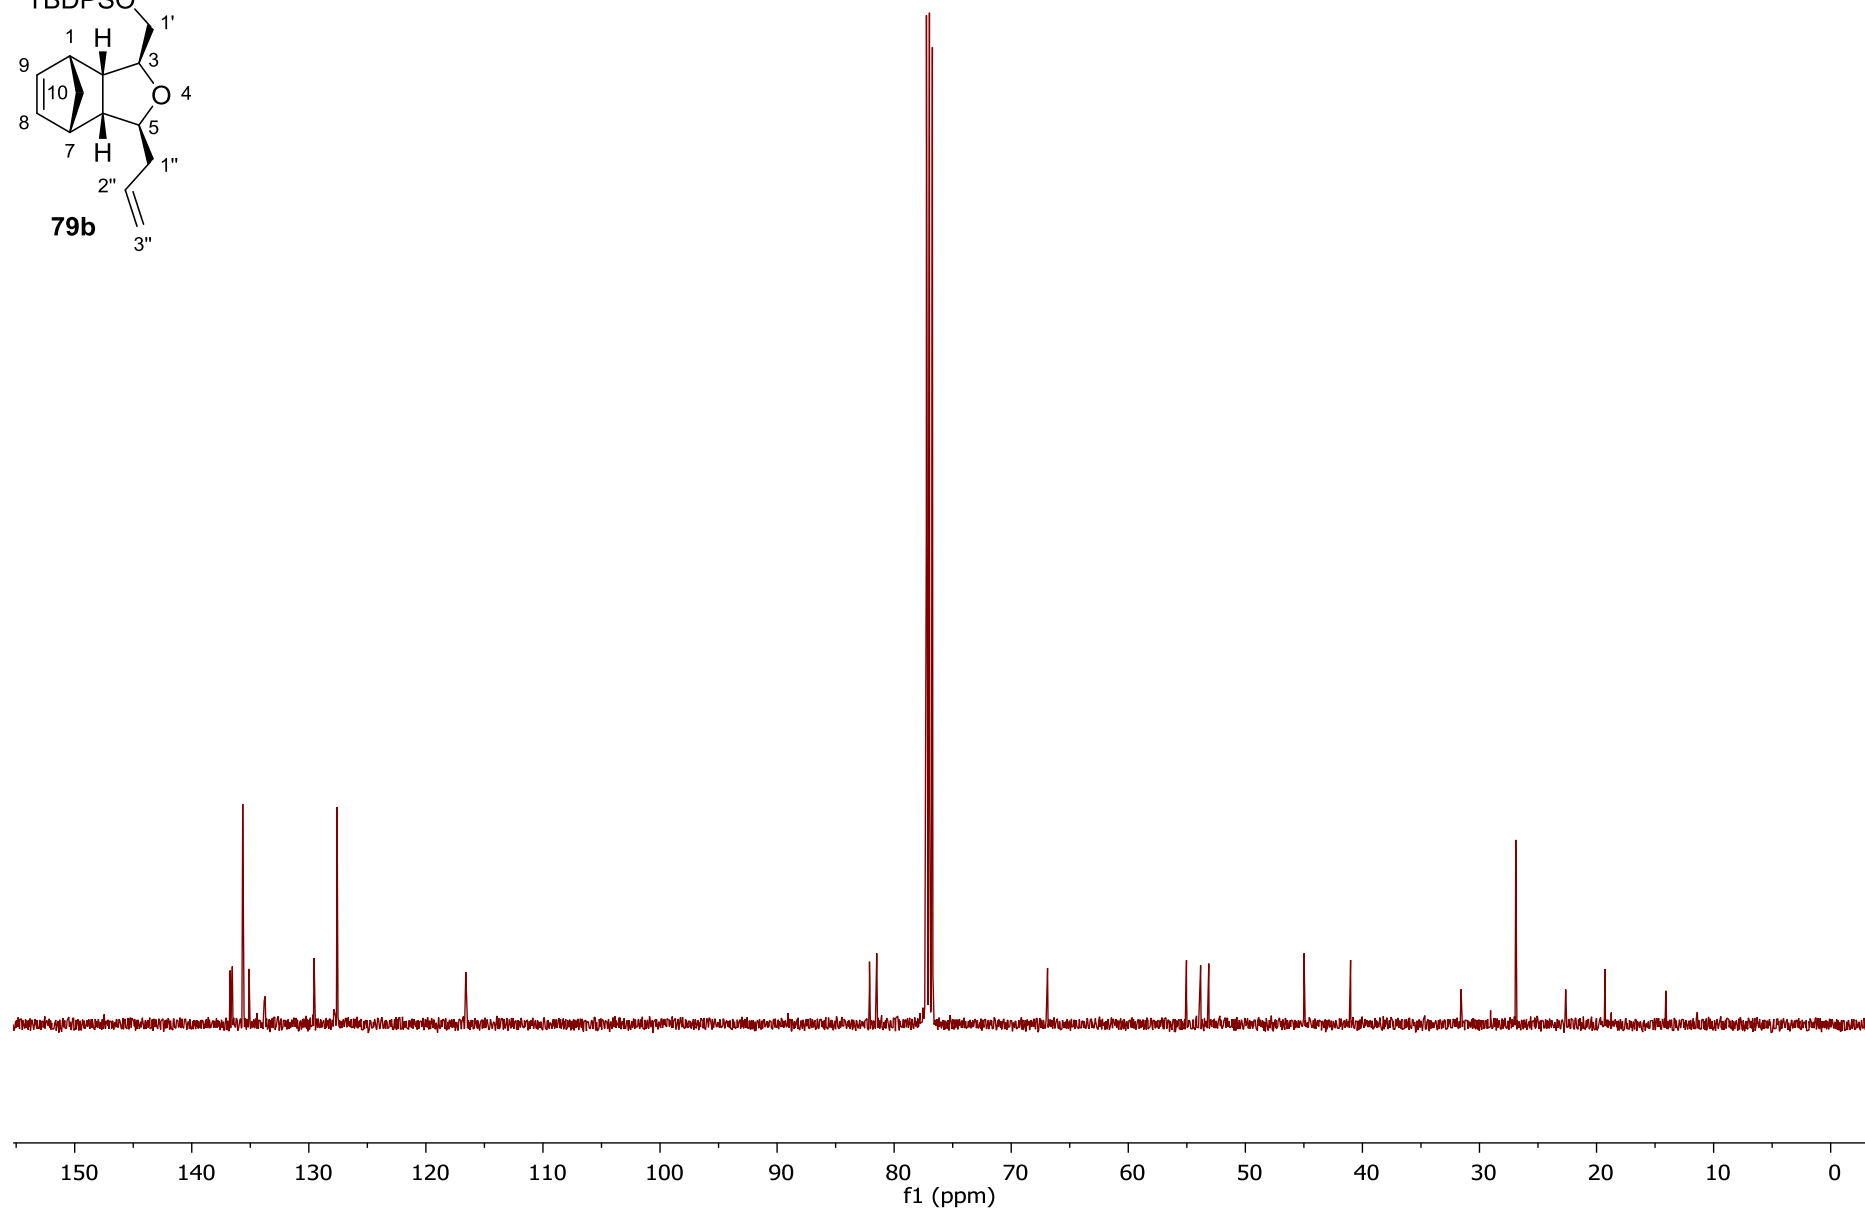



((1S,3S,3aR,4S,7R,7aS)-3-allyl-1,3,3a,4,7,7a-hexahydro-4,7-methanoisobenzofuran-1-yl)methanol **79**

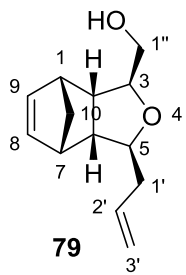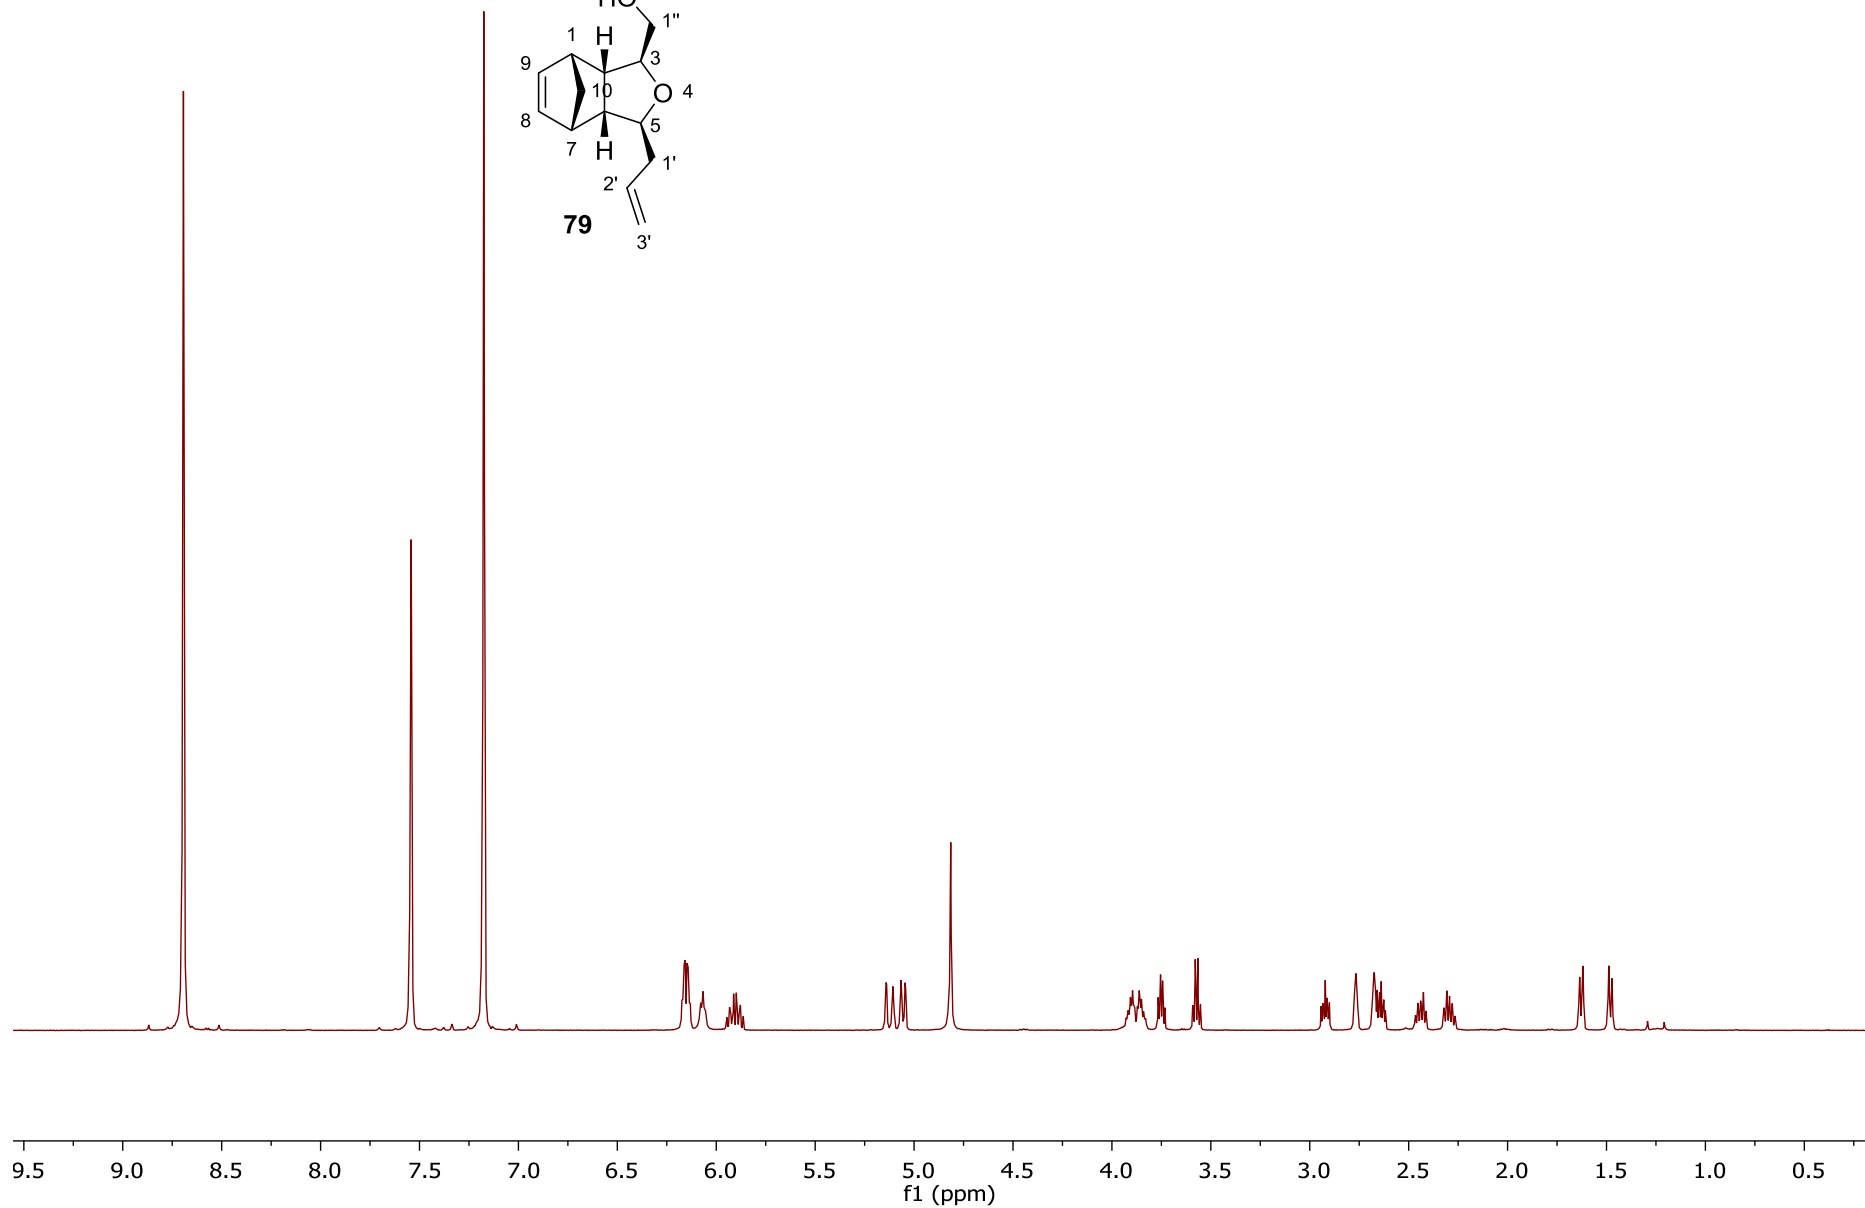

((1S,3S,3aR,4S,7R,7aS)-3-allyl-1,3,3a,4,7,7a-hexahydro-4,7-methanoisobenzofuran-1-yl)methanol **79**

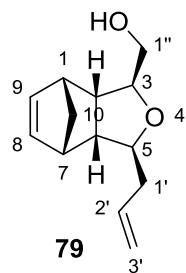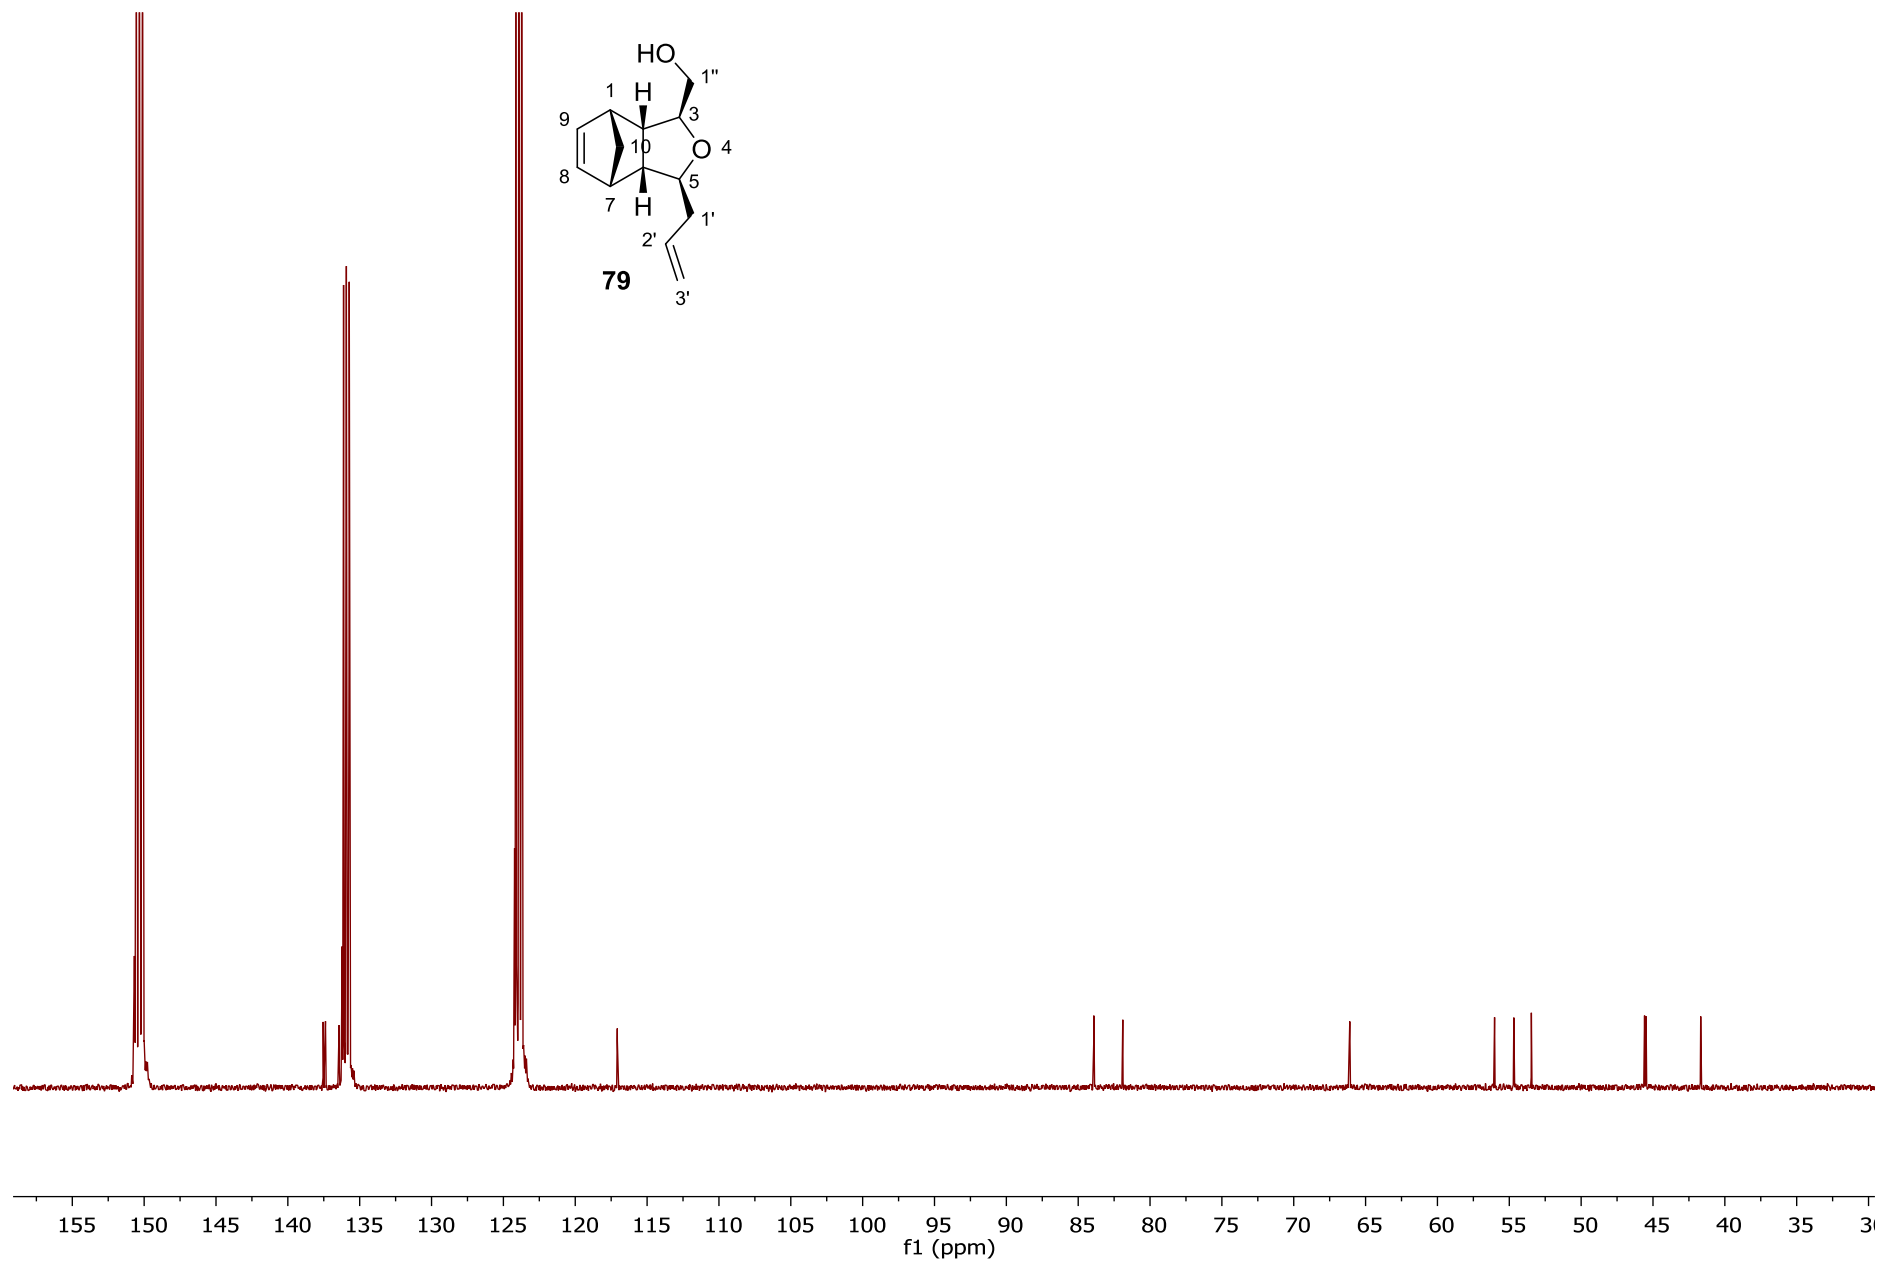

((1S,3S,3aR,4S,7R,7aS)-3-allyl-1,3,3a,4,7,7a-hexahydro-4,7-methanoisobenzofuran-1-yl)methyl but-3-enoate **80**

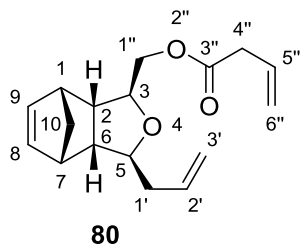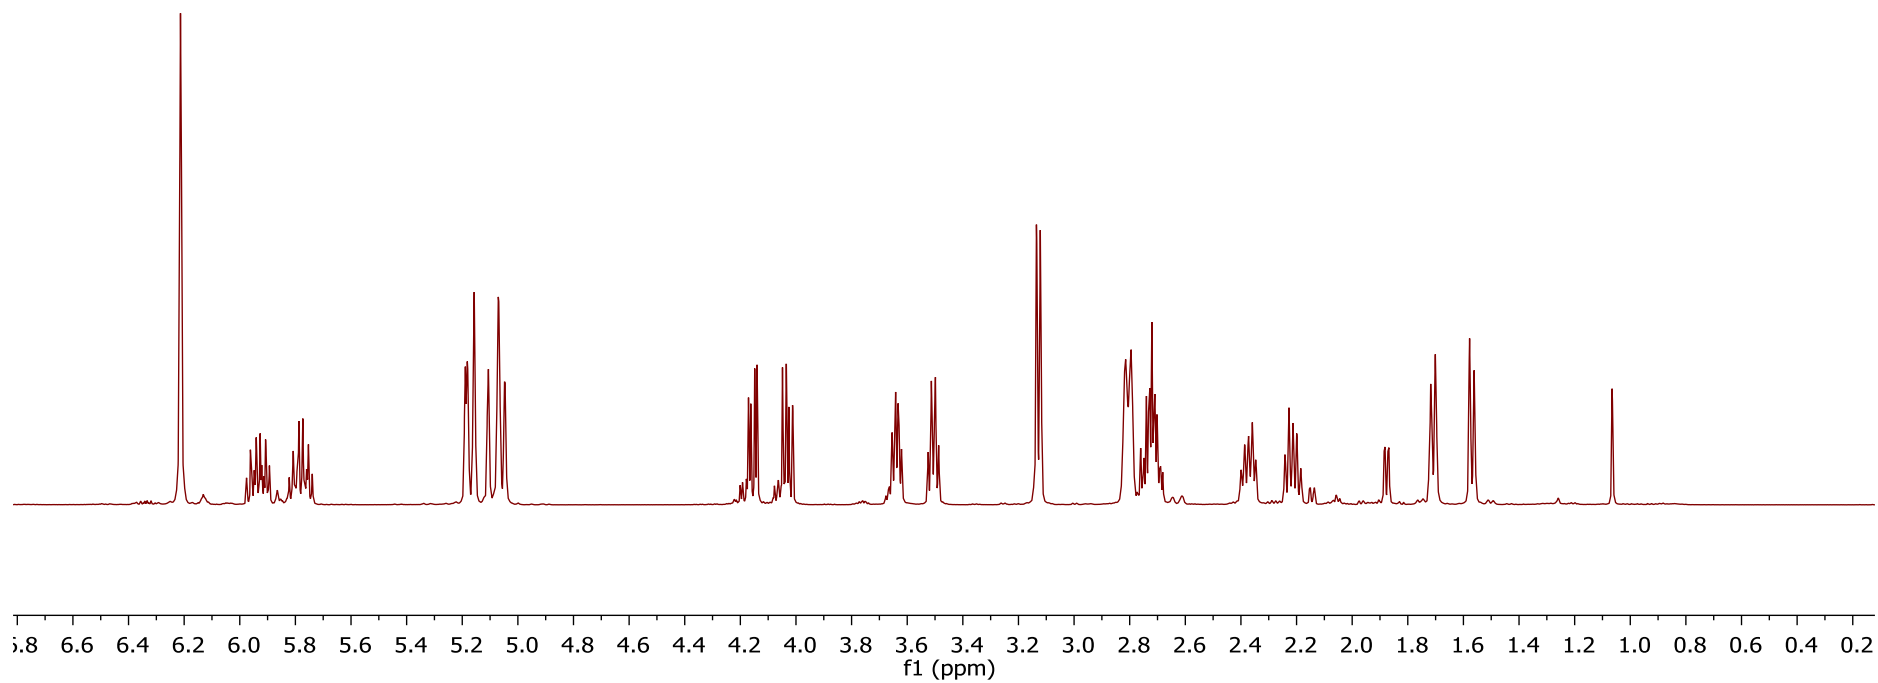

((1S,3S,3aR,4S,7R,7aS)-3-allyl-1,3,3a,4,7,7a-hexahydro-4,7-methanoisobenzofuran-1-yl)methyl but-3-enoate **80**

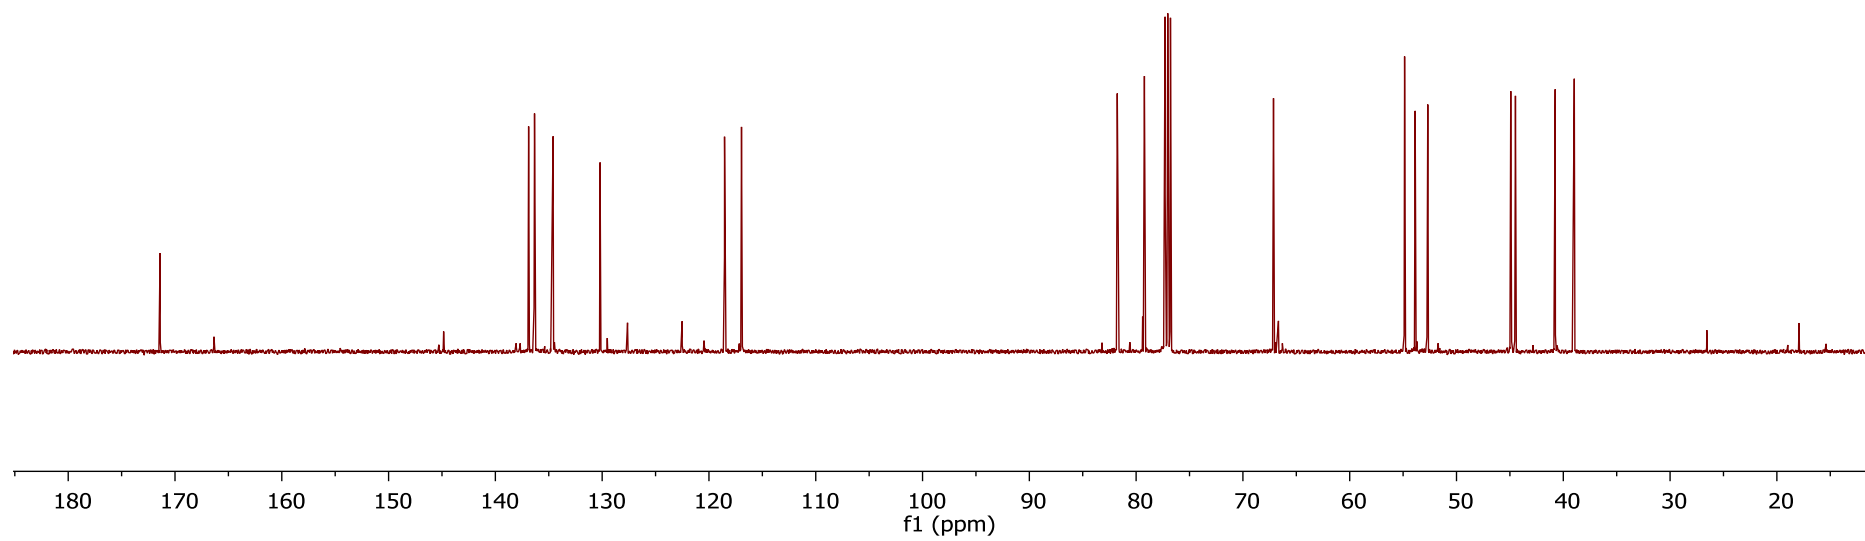

((1S,3S,3aR,4S,7R,7aS)-3-allyl-1,3,3a,4,7,7a-hexahydro-4,7-methanoisobenzofuran-1-yl)methyl pent-4-enoate **81**

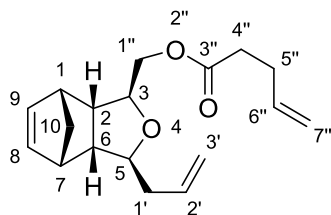

**81**

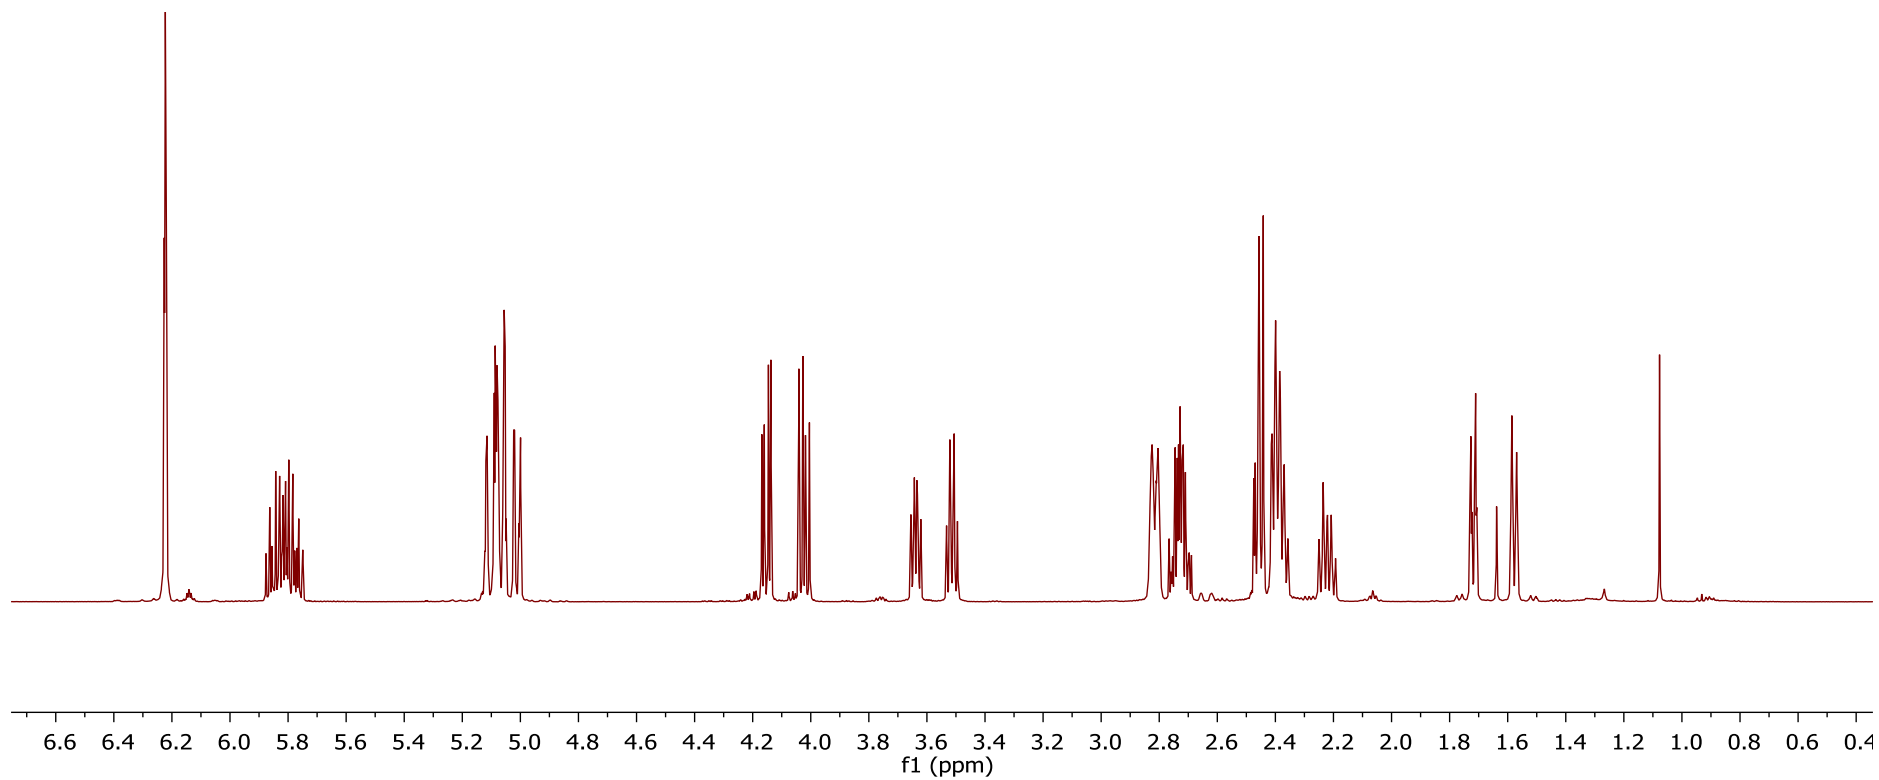

((1S,3S,3aR,4S,7R,7aS)-3-allyl-1,3,3a,4,7,7a-hexahydro-4,7-methanoisobenzofuran-1-yl)methyl pent-4-enoate **81**



**81**

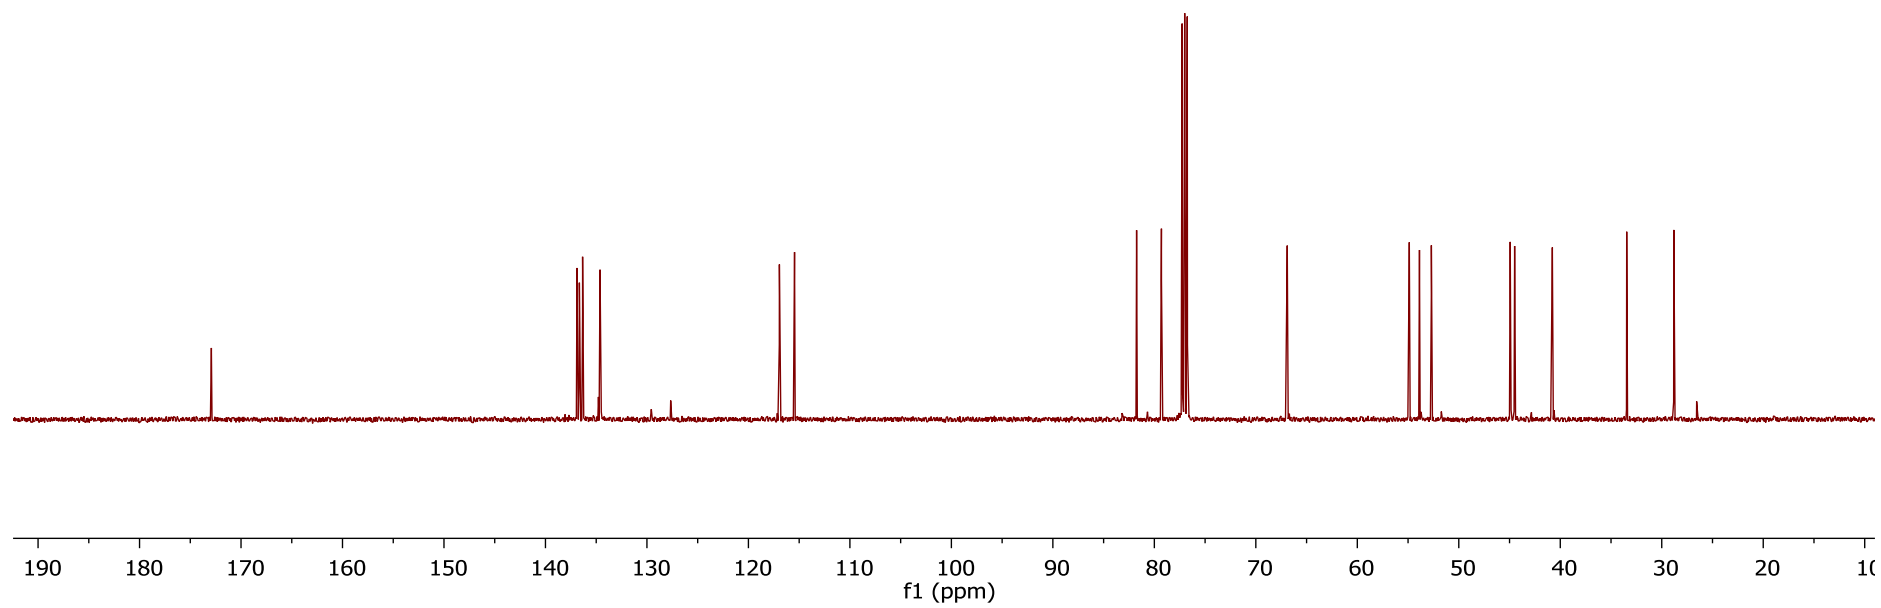

((1S,3S,3aR,4S,7R,7aS)-3-allyl-1,3,3a,4,7,7a-hexahydro-4,7-methanoisobenzofuran-1-yl)methyl hex-5-enoate **82**

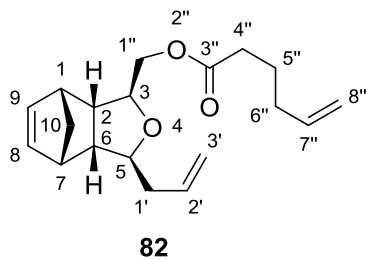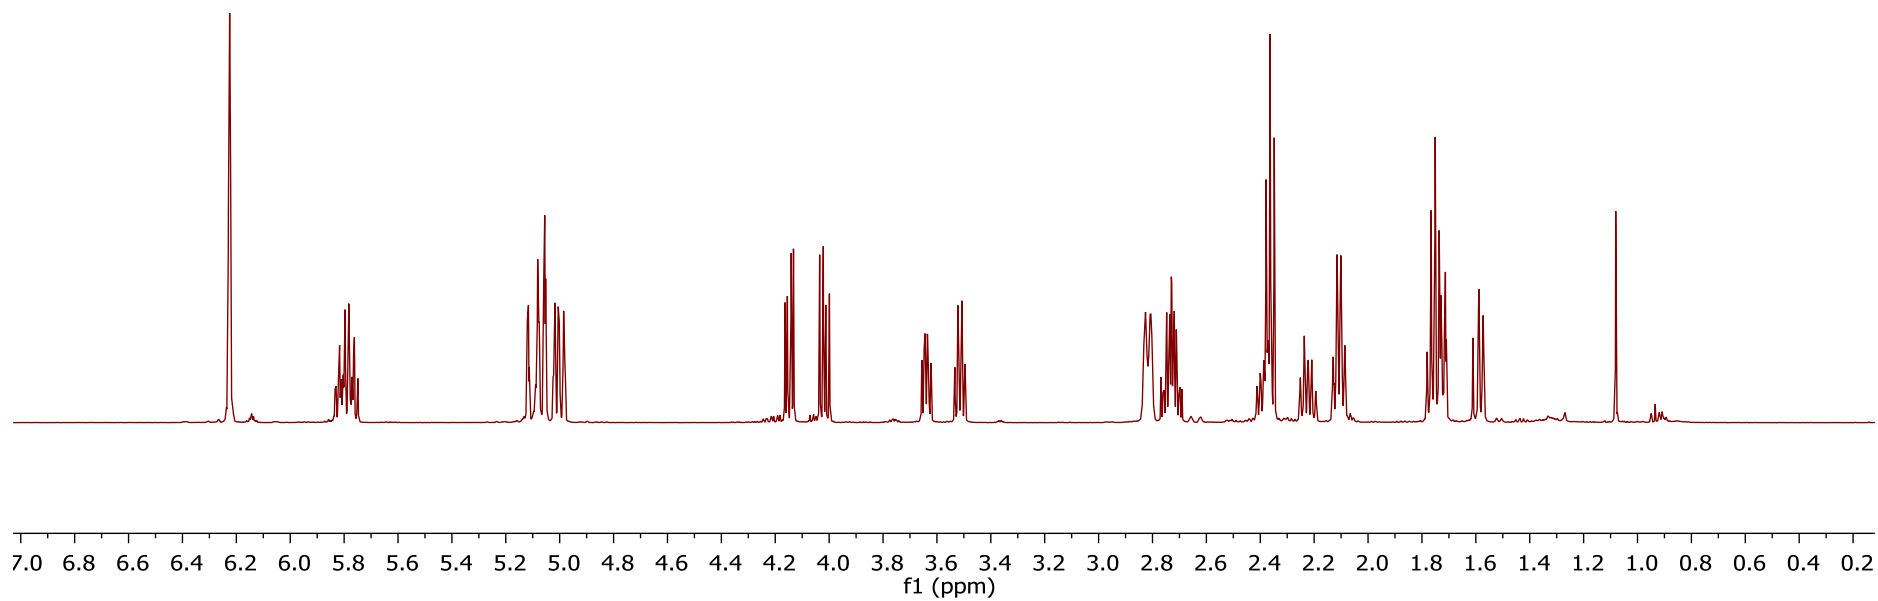

((1S,3S,3aR,4S,7R,7aS)-3-allyl-1,3,3a,4,7,7a-hexahydro-4,7-methanoisobenzofuran-1-yl)methyl hex-5-enoate **82**

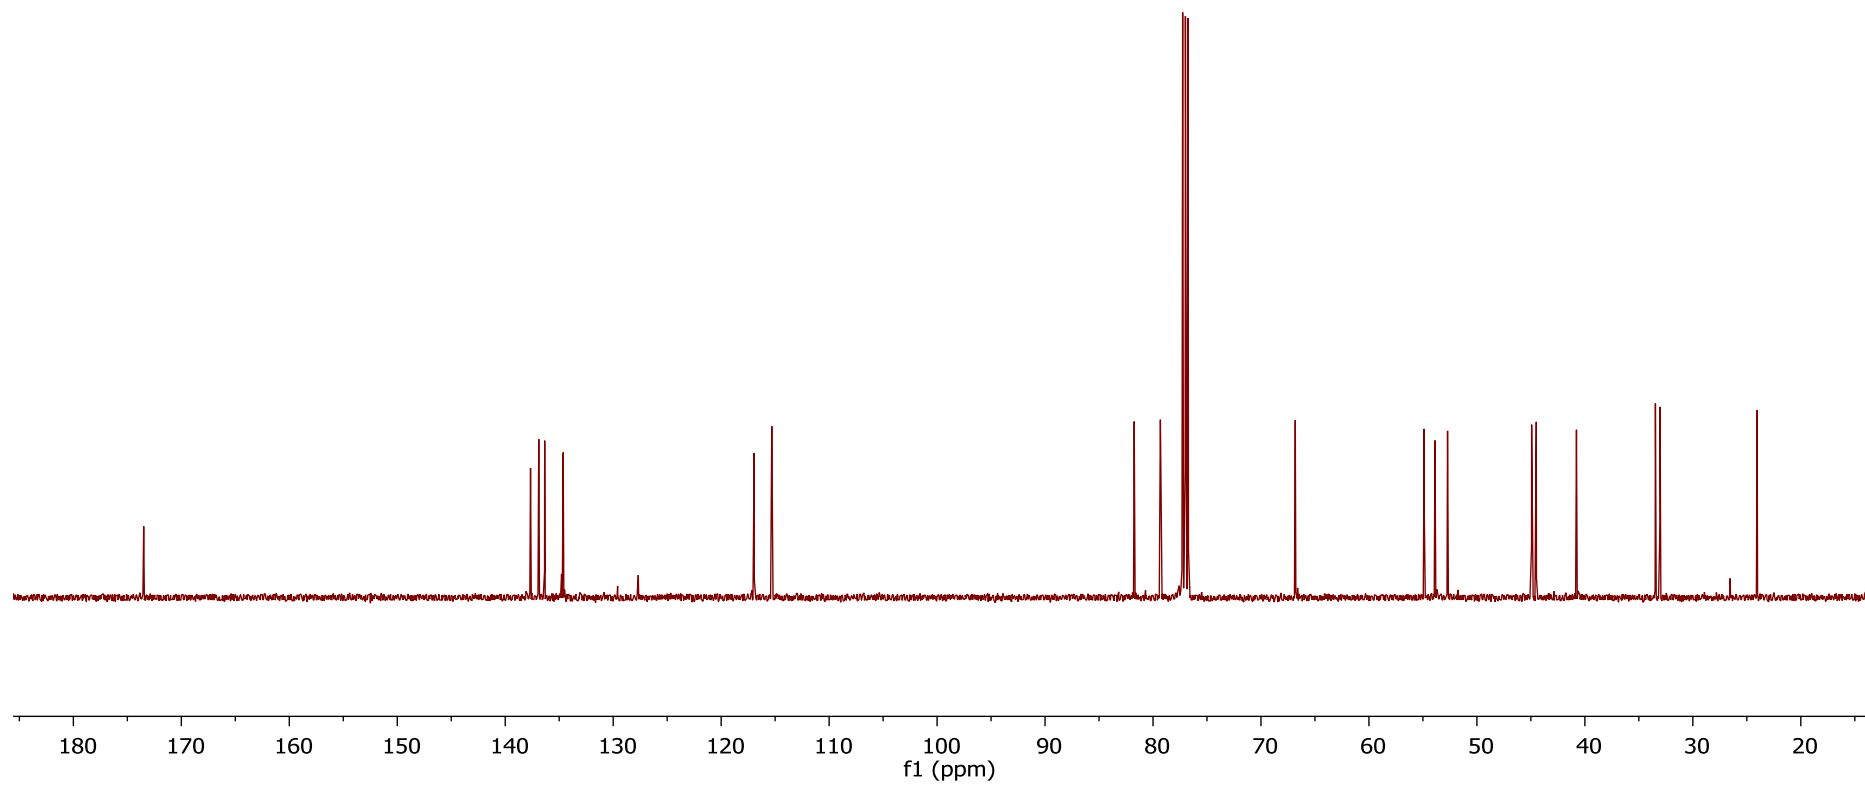



[(1S,3R,3aR,7aS)-3-(2-methyl-3-oxobutan-2-yl)-octahydro-2-benzofuran-1-yl]methyl 2-bromoacetate **89a**

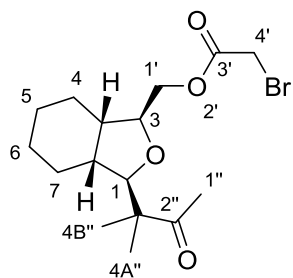

**89a**

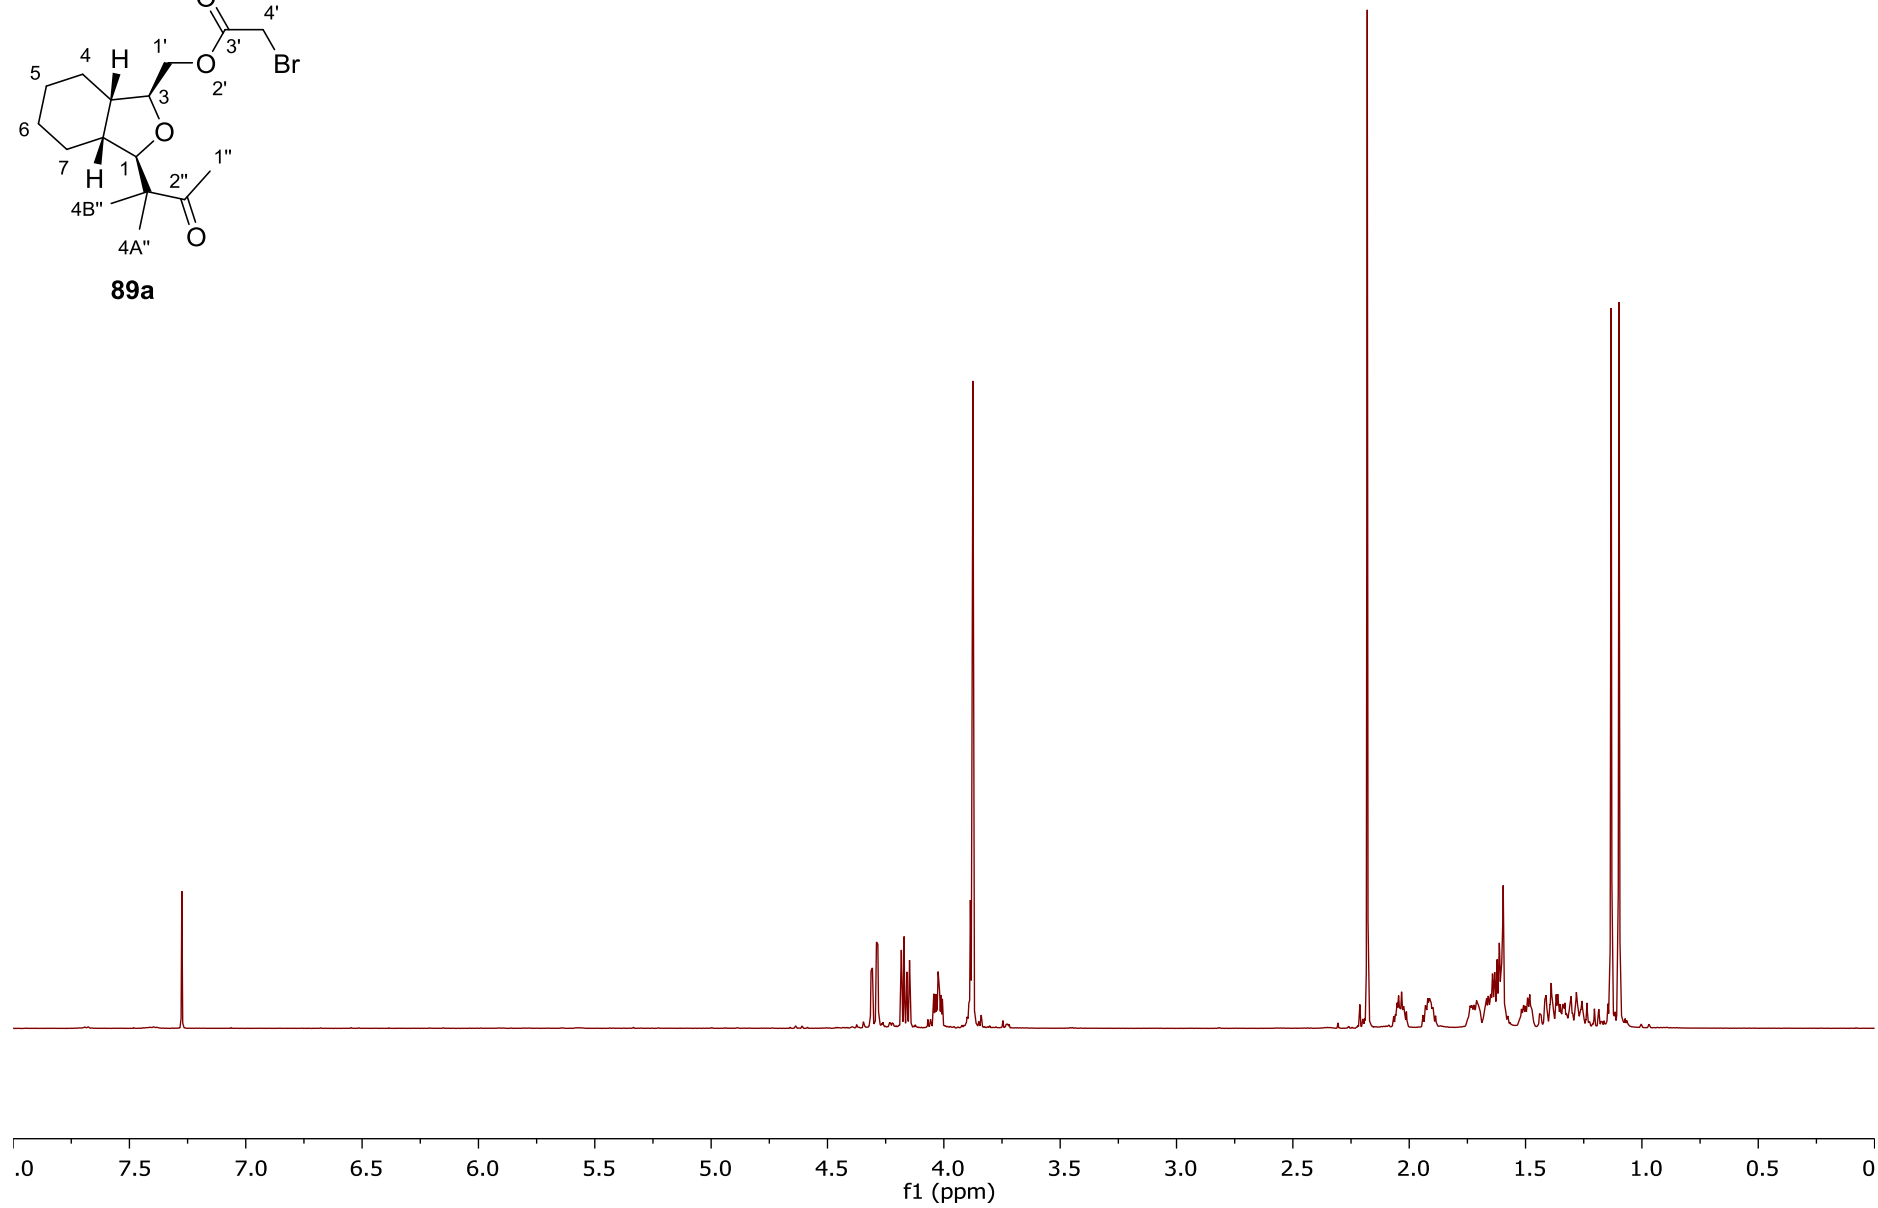

[(1S,3R,3aR,7aS)-3-(2-methyl-3-oxobutan-2-yl)-octahydro-2-benzofuran-1-yl]methyl acetate **89**

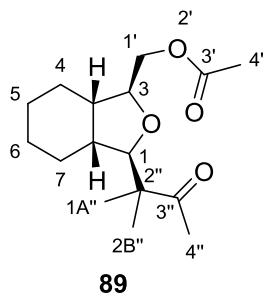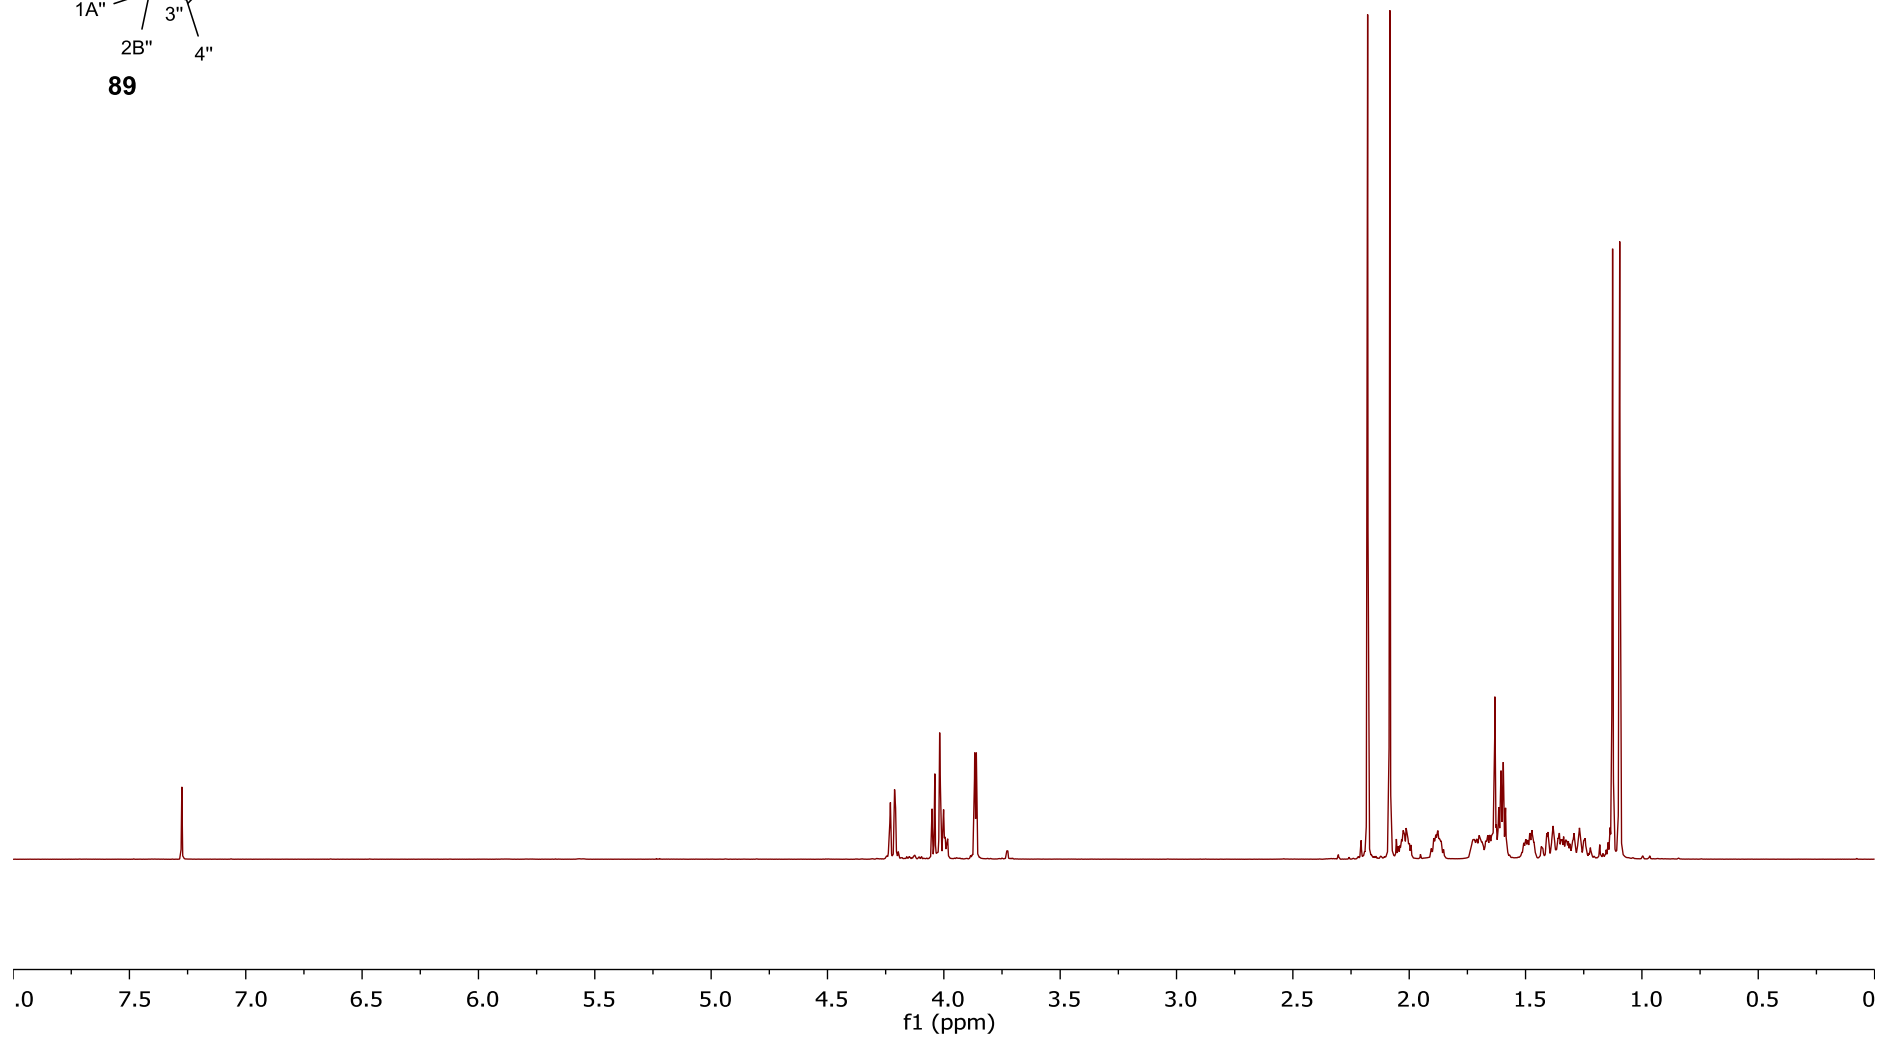

[(1S,3R,3aR,7aS)-3-(2-methyl-3-oxobutan-2-yl)-octahydro-2-benzofuran-1-yl]methyl acetate **89**

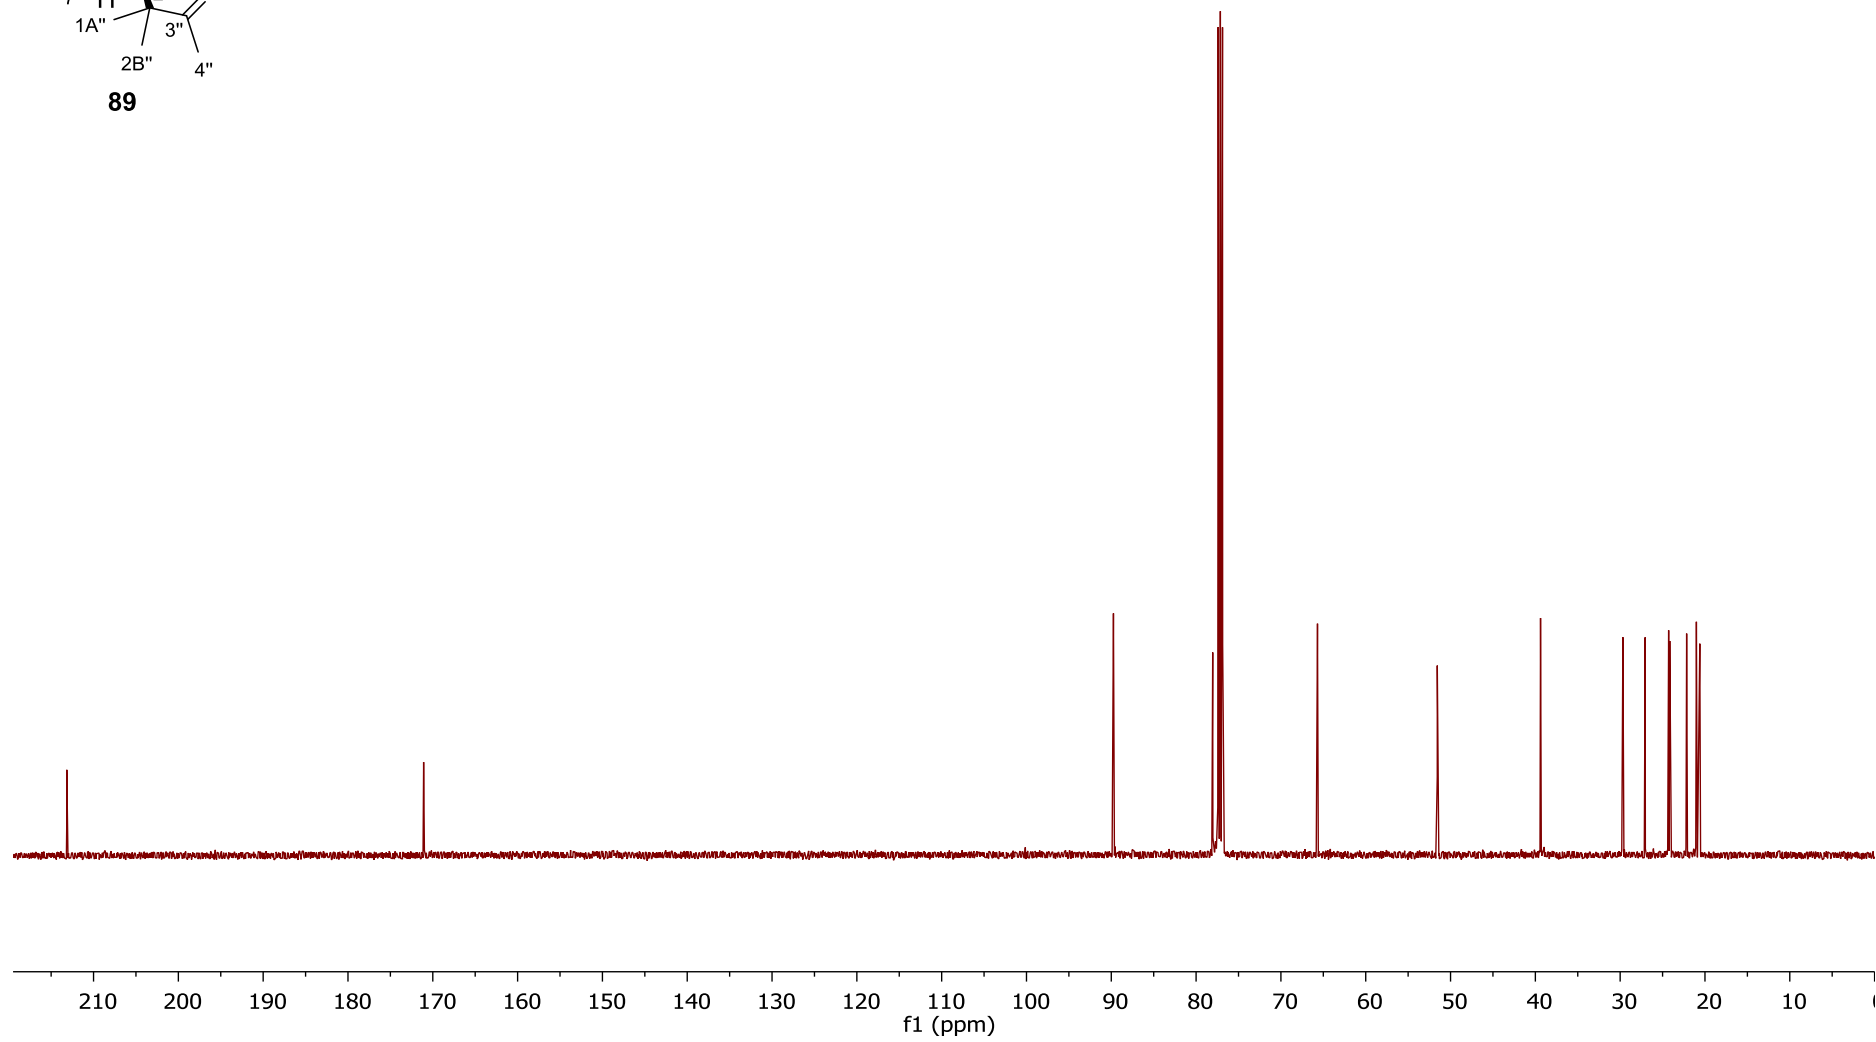

Supplement: CHEM-22-5657-s001.pdf [file CHEM-22-5657-s001.pdf]
